# Supplementary material for: Comparative Analysis of Codon Usage Patterns in Nuclear and Chloroplast Genome of Dalbergia (Fabaceae)
Source: MDPI journal article supplement (doi:10.3390/genes14051110), 2023-05-19
Supplement: s1 [file s1]

## **Description of Additional Supplementary Files**

### **Supplementary Data 1**

Description: Chloroplast genome of 25 *Dalbergia* species

### **Supplementary Data 2**

Description: Amino acids of four types of synonymous codons

### **Supplementary Data 3**

Description: Whole genome and chloroplast genome protein coding sequence information

### **Supplementary Data 4**

Description: Codon usage indices of nuclear genome and chloroplast genome

### **Supplementary Data 5**

Description: Codon GC content of 25 *Dalbergia* species

### **Supplementary Data 6**

Description: Neutral plot analysis data for nuclear and chloroplast genomes

### **Supplementary Data 7**

Description: Nuclear genome optimal codon

### **Supplementary Data 8**

Description: Statistics of gene expression at different levels

### **Supplementary Data 9**

Description: Information on the four bases of the nuclear genome in leaf tissues.

### **Supplementary Data 10**

Description: Amino acid level gene expression information statistics
