# Supplementary material for: Comparative Analysis of Codon Usage Patterns in Nuclear and Chloroplast Genome of Dalbergia (Fabaceae)
Source: MDPI journal article supplement (doi:10.3390/genes14051110), 2023-05-19
Supplement: s1 [file s1]

## Supplementary Information

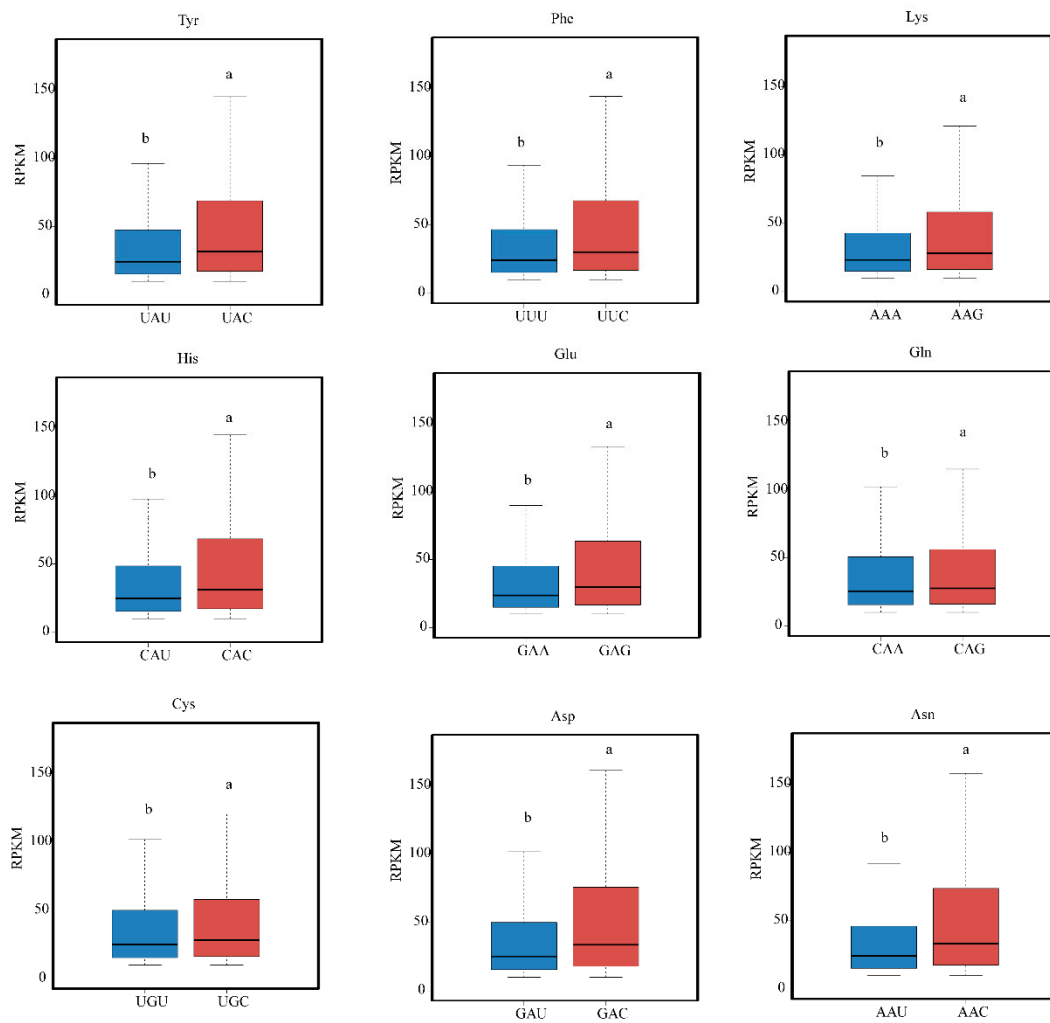

**Figure S1.** The relationship between RPKM value and synonymous codon preference in amino acid level (all amino acids with two synonymous codons, and lower a and b in boxplot meant the significant difference in statistical analysis).

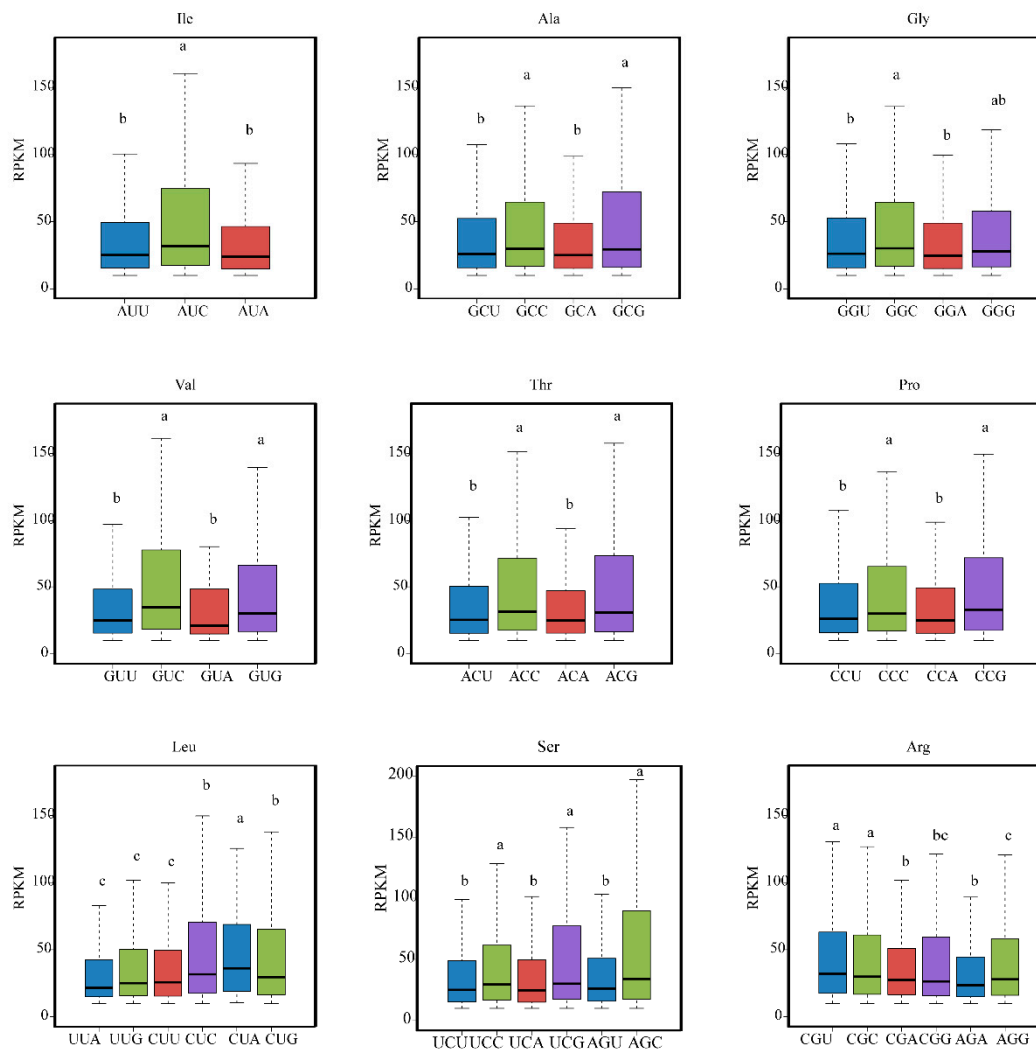

**Figure S2.** The relationship between RPKM value and synonymous codon preference in amino acid level (all amino acids with more than two synonymous codons, and lower a and b in boxplot meant the significant difference in statistical analysis).

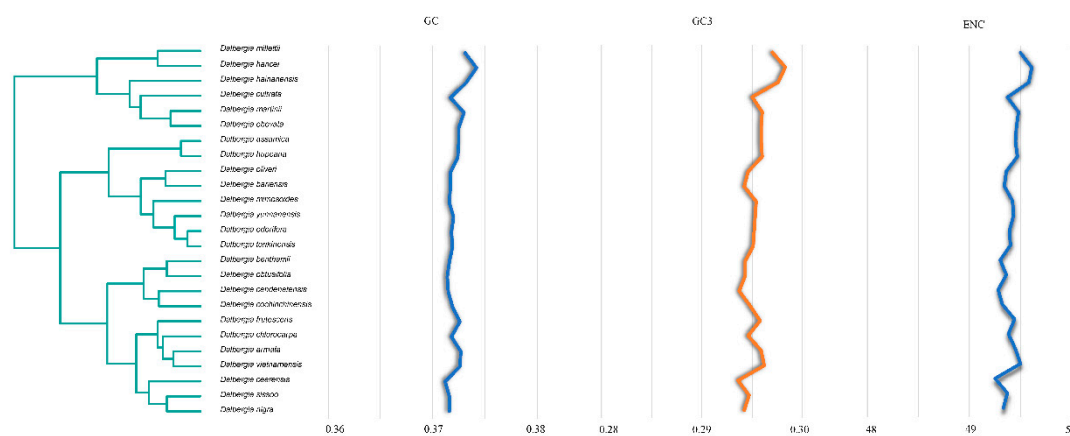

**Figure S3.** Clustering diagram based on RSCU values and its codon usage indicator

trend lines (GC content of chloroplast protein-coding sequences; GC3: content of G+C at the third position of chloroplast protein-coding sequences; ENC: number of effective codons).
