# Supplementary material for: Comparative Analysis of Codon Usage Patterns in Nuclear and Chloroplast Genome of Dalbergia (Fabaceae)
Source: Genes (Basel). 2023 May 19;14(5):1110. doi: 10.3390/genes14051110 (PMC10217945; doi:10.3390/genes14051110)
Supplement: Supplementary file 1 [file genes-14-01110-s001.zip]

Archive with 12 entries (12 files):
- Description of Additional Supplementary Files.pdf
- Supplementary Excel S1.xlsx
- Supplementary Excel S10.xlsx
- Supplementary Excel S2.xlsx
- Supplementary Excel S3.xlsx
- Supplementary Excel S4.xlsx
- Supplementary Excel S5.xlsx
- Supplementary Excel S6.xlsx
- Supplementary Excel S7.xlsx
- Supplementary Excel S8.xlsx
- Supplementary Excel S9.xlsx
- Supplementary Information.pdf
