# Supplementary material for: Comparative Analysis of Codon Usage Patterns in Nuclear and Chloroplast Genome of Dalbergia (Fabaceae)
Source: Genes (Basel). 2023 May 19;14(5):1110. doi: 10.3390/genes14051110 (PMC10217945; doi:10.3390/genes14051110)
Supplement: Supplementary file 1 [file genes-14-01110-s001.zip › Supplementary Excel S1.xlsx]

## Sheet: Sheet1
code	species	Length/bp	GenBank ID
A	Dalbergia armata	156246	NC_049048.1
B	Dalbergia cearensis	156314	NC_049046.1
C	Dalbergia chlorocarpa	155745	NC_049047.1
D	Dalbergia cultrata	156385	NC_044117.1
E	Dalbergia frutescens	156105	NC_049044.1
F	Dalbergia hainanensis	156073	NC_036961.1
G	Dalbergia martinii	157123	NC_049049.1
H	Dalbergia obovata	156012	NC_049045.1
I	Dalbergia odorifera	156049	NC_049008.1
J	Dalbergia oliveri	155838	NC_053827.1
K	Dalbergia sissoo	155863	NC_049043.1
L	Dalbergia tonkinensis	156090	NC_049007.1
M	Dalbergia vietnamensis	156088	NC_049050.1
N	Dalbergia yunnanensis	155823	NC_049009.1
O	Dalbergia candenatensis	155947	NC_062098.1
P	Dalbergia millettii	155907	NC_062097.1
Q	Dalbergia benthamii	156638	NC_062096.1
R	Dalbergia hancei	155859	NC_062095.1
S	Dalbergia assamica	155835	NC_062094.1
T	Dalbergia mimosoides	155773	NC_063304.1
U	Dalbergia obtusifolia	156419	NC_063303.1
V	Dalbergia cochinchinensis	156576	NC_058539.1
W	Dalbergia bariensis	156544	NC_058538.1
X	Dalbergia nigra	155330	NC_058537.1
Y	Dalbergia hupeana	155829	NC_058536.1
