# Supplementary material for: Comparative Analysis of Codon Usage Patterns in Nuclear and Chloroplast Genome of Dalbergia (Fabaceae)
Source: Genes (Basel). 2023 May 19;14(5):1110. doi: 10.3390/genes14051110 (PMC10217945; doi:10.3390/genes14051110)
Supplement: Supplementary file 1 [file genes-14-01110-s001.zip › Supplementary Excel S2.xlsx]

## Sheet: Sheet1
Synonymous codon types	Amino acids
2	Phe，His，Lys，Asn，Asp，Cys，Gln，Glu，Tyr
3	Ile
4	Pro,Thr, Ala, Gly, Val
6	Ser, Leu, Arg
