# Supplementary material for: Comparative Analysis of Codon Usage Patterns in Nuclear and Chloroplast Genome of Dalbergia (Fabaceae)
Source: Genes (Basel). 2023 May 19;14(5):1110. doi: 10.3390/genes14051110 (PMC10217945; doi:10.3390/genes14051110)
Supplement: Supplementary file 1 [file genes-14-01110-s001.zip › Supplementary Excel S3.xlsx]

## Sheet: Sheet1
Whole genome and chloroplast genome protein coding sequence information
Type	Number of Species	Total size	Sequence number
		(bp)	Raw	Selected
Whole genome	1	34849373	30310	27940
Chloroplast genome	25	2429751	2090	1439
