# Supplementary material for: Comparative Analysis of Codon Usage Patterns in Nuclear and Chloroplast Genome of Dalbergia (Fabaceae)
Source: Genes (Basel). 2023 May 19;14(5):1110. doi: 10.3390/genes14051110 (PMC10217945; doi:10.3390/genes14051110)
Supplement: Supplementary file 1 [file genes-14-01110-s001.zip › Supplementary Excel S4.xlsx]

## Sheet: Whole Genome
	indicators
gene	T3s	C3s	A3s	G3s	Nc	GC3s	GC
evm.model.scaffold_30.17	0.4439	0.2014	0.36	0.2828	51.45	0.369	0.453
evm.model.scaffold_30.33	0.4864	0.2035	0.3021	0.262	52.22	0.354	0.428
evm.model.scaffold_30.74	0.4645	0.1625	0.4101	0.27	52.02	0.323	0.422
evm.model.scaffold_30.62	0.4862	0.1896	0.3321	0.2829	49.01	0.345	0.393
evm.model.scaffold_30.18	0.449	0.1791	0.3384	0.328	51.28	0.385	0.419
evm.model.scaffold_30.35	0.3502	0.2857	0.3083	0.3261	58.17	0.477	0.478
evm.model.scaffold_30.6	0.3817	0.2231	0.4241	0.2331	46.05	0.354	0.422
evm.model.scaffold_30.61	0.2649	0.2848	0.3072	0.3082	52.07	0.503	0.546
evm.model.scaffold_30.99.1	0.4423	0.2356	0.3529	0.2332	50.69	0.364	0.444
evm.model.scaffold_30.93	0.3891	0.2636	0.3404	0.2936	57.08	0.423	0.44
evm.model.scaffold_30.98	0.3797	0.3924	0.241	0.2469	55.64	0.505	0.506
evm.model.scaffold_30.15	0.4711	0.1983	0.3333	0.3146	61	0.369	0.403
evm.model.scaffold_30.57	0.4681	0.2411	0.3248	0.215	50.07	0.354	0.425
evm.model.scaffold_30.38	0.3474	0.3621	0.242	0.3227	54.48	0.529	0.499
evm.model.scaffold_30.27	0.43	0.16	0.2921	0.2727	47.6	0.349	0.406
evm.model.scaffold_30.89_evm.model.scaffold_30.90	0.4534	0.2024	0.4279	0.2374	50.65	0.322	0.403
evm.model.scaffold_30.58	0.4845	0.1881	0.3035	0.2853	46.8	0.364	0.436
evm.model.scaffold_30.81	0.3933	0.2887	0.316	0.3085	55.19	0.449	0.447
evm.model.scaffold_30.3	0.4558	0.165	0.4336	0.2416	47.99	0.303	0.404
evm.model.scaffold_30.53	0.2849	0.3476	0.1696	0.4472	51.09	0.627	0.511
evm.model.scaffold_30.97	0.4397	0.1206	0.4198	0.2339	48.42	0.282	0.429
evm.model.scaffold_30.42	0.2139	0.4691	0.1831	0.3364	50.99	0.667	0.578
evm.model.scaffold_30.92	0.3843	0.2603	0.3506	0.2857	56.59	0.418	0.443
evm.model.scaffold_30.13	0.3786	0.2821	0.2797	0.4031	53.68	0.496	0.449
evm.model.scaffold_30.16	0.4041	0.1712	0.2857	0.3675	52.84	0.417	0.493
evm.model.scaffold_30.41	0.4138	0.2414	0.3439	0.2606	60.13	0.385	0.455
evm.model.scaffold_30.28	0.4517	0.2245	0.3344	0.2297	50.83	0.353	0.418
evm.model.scaffold_30.50	0.4713	0.2193	0.3208	0.2552	52.79	0.36	0.422
evm.model.scaffold_30.59	0.3333	0.2323	0.1667	0.5	45.58	0.565	0.49
evm.model.scaffold_30.64	0.4762	0.1693	0.3913	0.3288	51.45	0.366	0.407
evm.model.scaffold_30.52	0.4444	0.2011	0.3248	0.3333	49.76	0.386	0.416
evm.model.scaffold_30.69	0.4248	0.2561	0.3066	0.2537	54.88	0.4	0.435
evm.model.scaffold_30.72	0.4574	0.2461	0.3095	0.2377	55.2	0.37	0.403
evm.model.scaffold_30.63	0.4731	0.1075	0.4048	0.2346	35.94	0.271	0.449
evm.model.scaffold_405.1.1	0.3458	0.3022	0.3048	0.3263	51.89	0.485	0.493
evm.model.scaffold_389.2	0.4714	0.1744	0.3233	0.2282	52.27	0.32	0.413
evm.model.scaffold_185.490	0.4204	0.2166	0.3526	0.2585	52.23	0.373	0.437
evm.model.scaffold_185.467	0.2746	0.4718	0.1358	0.3782	42.41	0.669	0.578
evm.model.scaffold_185.428	0.3739	0.3484	0.2591	0.3007	55.62	0.495	0.458
evm.model.scaffold_185.485	0.3958	0.2164	0.3388	0.2865	51.83	0.396	0.438
evm.model.scaffold_185.420	0.3801	0.2757	0.3742	0.216	54.72	0.389	0.442
evm.model.scaffold_185.43	0.392	0.1989	0.4114	0.2162	51.84	0.333	0.434
evm.model.scaffold_185.496	0.3902	0.2569	0.306	0.2441	56.9	0.406	0.463
evm.model.scaffold_185.439	0.2348	0.4493	0.2262	0.3074	51.17	0.617	0.547
evm.model.scaffold_185.465_evm.model.scaffold_185.466	0.4596	0.1975	0.3188	0.2496	51.39	0.349	0.41
evm.model.scaffold_185.240	0.2899	0.3333	0.322	0.3551	53.85	0.519	0.462
evm.model.scaffold_185.534	0.4012	0.2705	0.3273	0.264	50.68	0.413	0.441
evm.model.scaffold_185.2	0.1825	0.5133	0.1852	0.2986	50.3	0.692	0.596
evm.model.scaffold_185.442	0.3103	0.2989	0.2597	0.2895	51.47	0.505	0.588
evm.model.scaffold_185.120	0.4144	0.2162	0.3419	0.3182	48.3	0.407	0.419
evm.model.scaffold_185.500	0.3194	0.373	0.1677	0.3584	52.87	0.59	0.532
evm.model.scaffold_185.27	0.406	0.2433	0.372	0.2528	52.07	0.379	0.434
evm.model.scaffold_185.340.1	0.4069	0.2468	0.3262	0.3099	57.92	0.42	0.443
evm.model.scaffold_185.28	0.3642	0.3148	0.2914	0.292	57.68	0.469	0.452
evm.model.scaffold_185.262	0.4414	0.2379	0.3192	0.2724	50.08	0.392	0.459
evm.model.scaffold_185.299	0.3651	0.2275	0.3813	0.3049	53.15	0.405	0.419
evm.model.scaffold_185.295	0.3772	0.2675	0.3276	0.3178	55.52	0.443	0.431
evm.model.scaffold_185.285	0.3108	0.3742	0.2776	0.2358	50.04	0.504	0.488
evm.model.scaffold_185.3	0.2589	0.4326	0.2288	0.2652	55.43	0.59	0.55
evm.model.scaffold_185.411	0.4369	0.2279	0.3216	0.2573	49.92	0.379	0.439
evm.model.scaffold_185.32	0.2018	0.5175	0.1391	0.4762	54.8	0.736	0.548
evm.model.scaffold_185.225	0.3636	0.2727	0.451	0.1633	48.7	0.348	0.436
evm.model.scaffold_185.29	0.4272	0.2488	0.311	0.2962	55.24	0.415	0.44
evm.model.scaffold_185.70	0.3721	0.1977	0.4744	0.169	39.1	0.296	0.41
evm.model.scaffold_185.6	0.3846	0.2821	0.1982	0.3868	58.27	0.525	0.486
evm.model.scaffold_185.117	0.4	0.3385	0.2719	0.1505	47.05	0.411	0.414
evm.model.scaffold_185.325	0.5191	0.1865	0.3446	0.2513	51.1	0.325	0.411
evm.model.scaffold_185.284	0.3894	0.2163	0.3839	0.3103	55.2	0.4	0.434
evm.model.scaffold_185.144	0.3593	0.3649	0.2484	0.2943	56.66	0.511	0.464
evm.model.scaffold_185.403	0.3789	0.3216	0.319	0.2784	58.77	0.454	0.443
evm.model.scaffold_185.376	0.501	0.2012	0.2871	0.281	52.42	0.364	0.431
evm.model.scaffold_185.518	0.3962	0.2496	0.3401	0.256	50.5	0.398	0.438
evm.model.scaffold_185.245	0.3042	0.3223	0.2514	0.4212	51.69	0.568	0.512
evm.model.scaffold_185.390	0.4139	0.1964	0.41	0.2727	52.89	0.35	0.413
evm.model.scaffold_185.307	0.4286	0.1353	0.4453	0.2937	44.98	0.318	0.402
evm.model.scaffold_185.375	0.5784	0.108	0.2964	0.0964	32.61	0.186	0.587
evm.model.scaffold_185.111	0.392	0.2415	0.3844	0.1825	49.5	0.344	0.416
evm.model.scaffold_185.82	0.4124	0.2558	0.3062	0.2356	54.13	0.4	0.485
evm.model.scaffold_185.494	0.4275	0.2128	0.3159	0.227	49.33	0.362	0.463
evm.model.scaffold_185.140	0.3578	0.2759	0.3571	0.2788	51.21	0.428	0.468
evm.model.scaffold_185.314	0.3812	0.2644	0.243	0.3966	50.76	0.511	0.487
evm.model.scaffold_185.129	0.2252	0.543	0.0941	0.3708	46.41	0.735	0.585
evm.model.scaffold_185.454	0.4013	0.2072	0.4163	0.3367	50.01	0.393	0.404
evm.model.scaffold_185.324	0.5407	0.1789	0.3319	0.2454	46	0.317	0.429
evm.model.scaffold_185.125	0.4352	0.2458	0.3498	0.2364	52.09	0.368	0.425
evm.model.scaffold_185.264	0.3962	0.2123	0.3762	0.2646	56.94	0.373	0.418
evm.model.scaffold_185.34	0.47	0.1767	0.2899	0.3719	49.14	0.405	0.433
evm.model.scaffold_185.115	0.2469	0.3827	0.1502	0.4078	51.92	0.658	0.616
evm.model.scaffold_185.514	0.3886	0.2668	0.3201	0.299	53.83	0.431	0.451
evm.model.scaffold_185.255	0.3846	0.3115	0.2771	0.2192	55.72	0.433	0.468
evm.model.scaffold_185.414	0.2709	0.4183	0.327	0.1809	56.25	0.507	0.498
evm.model.scaffold_185.216	0.3671	0.3092	0.3169	0.2448	51.44	0.441	0.466
evm.model.scaffold_185.99	0.4035	0.2046	0.4038	0.26	50.38	0.357	0.416
evm.model.scaffold_185.269	0.4459	0.2162	0.4545	0.1618	44.05	0.284	0.353
evm.model.scaffold_185.363	0.2778	0.4198	0.2117	0.3566	44.56	0.606	0.509
evm.model.scaffold_185.274	0.3838	0.3506	0.1882	0.3133	50.83	0.532	0.511
evm.model.scaffold_185.427	0.4187	0.2003	0.3926	0.2929	50.17	0.37	0.416
evm.model.scaffold_185.384	0.4737	0.1842	0.3333	0.129	47.13	0.277	0.485
evm.model.scaffold_185.422	0.4201	0.2604	0.2604	0.3077	54.82	0.443	0.471
evm.model.scaffold_185.246	0.4268	0.2845	0.2727	0.299	47.6	0.442	0.464
evm.model.scaffold_185.296	0.3824	0.2132	0.3636	0.3226	58.91	0.408	0.41
evm.model.scaffold_185.481	0.3268	0.2439	0.4	0.2961	57.99	0.415	0.454
evm.model.scaffold_185.444	0.3413	0.2747	0.3088	0.3293	55.64	0.471	0.479
evm.model.scaffold_185.301	0.377	0.2131	0.36	0.2544	58.24	0.377	0.487
evm.model.scaffold_185.404	0.3187	0.3593	0.2645	0.2713	53.9	0.511	0.479
evm.model.scaffold_185.105	0.3726	0.3147	0.25	0.3238	56.32	0.493	0.451
evm.model.scaffold_185.499	0.4598	0.2069	0.3517	0.2276	52.64	0.34	0.455
evm.model.scaffold_185.212	0.3478	0.2899	0.3947	0.3514	38.83	0.46	0.425
evm.model.scaffold_185.80	0.3788	0.2182	0.3481	0.3581	50.52	0.431	0.433
evm.model.scaffold_185.451	0.3905	0.2162	0.4029	0.3033	52.7	0.389	0.423
evm.model.scaffold_185.448	0.3306	0.279	0.3139	0.3635	54.76	0.489	0.473
evm.model.scaffold_185.38	0.381	0.2762	0.33	0.2632	55.52	0.425	0.453
evm.model.scaffold_185.541	0.4298	0.1842	0.2054	0.3208	56	0.433	0.538
evm.model.scaffold_185.148	0.1597	0.0903	0.3214	0.5833	31.21	0.57	0.527
evm.model.scaffold_185.397	0.2167	0.4417	0.211	0.35	55.68	0.642	0.566
evm.model.scaffold_185.48	0.4581	0.2512	0.2022	0.2831	53.97	0.43	0.468
evm.model.scaffold_185.190	0.2818	0.3636	0.2667	0.3373	53.81	0.553	0.495
evm.model.scaffold_185.163	0.4665	0.1796	0.349	0.2484	50.89	0.331	0.423
evm.model.scaffold_185.443	0.3019	0.2516	0.2282	0.4225	52.47	0.549	0.538
evm.model.scaffold_185.35	0.2035	0.5398	0.1391	0.4808	47.61	0.74	0.54
evm.model.scaffold_185.310	0.382	0.2734	0.2143	0.4627	56.17	0.546	0.51
evm.model.scaffold_185.138	0.2619	0.4296	0.2118	0.3426	54.25	0.612	0.509
evm.model.scaffold_185.116	0.4606	0.1924	0.3672	0.2456	49.39	0.337	0.432
evm.model.scaffold_185.479	0.3671	0.2464	0.3318	0.311	60.23	0.441	0.477
evm.model.scaffold_185.323	0.4366	0.2218	0.3384	0.2	48.05	0.343	0.434
evm.model.scaffold_185.336	0.2137	0.4872	0.2234	0.3529	45.57	0.654	0.531
evm.model.scaffold_185.141	0.4537	0.1685	0.4114	0.2509	50.14	0.318	0.395
evm.model.scaffold_185.293	0.3928	0.253	0.3061	0.3202	57.9	0.444	0.477
evm.model.scaffold_185.482	0.5123	0.1111	0.2065	0.3007	39.1	0.358	0.576
evm.model.scaffold_185.421	0.4505	0.2184	0.3172	0.26	49.72	0.373	0.448
evm.model.scaffold_185.386	0.4565	0.2391	0.3333	0.3	50.38	0.401	0.423
evm.model.scaffold_185.46	0.467	0.2235	0.368	0.2379	52.55	0.343	0.409
evm.model.scaffold_185.510	0.4184	0.102	0.4844	0.2584	47.64	0.279	0.421
evm.model.scaffold_185.538	0.5066	0.1579	0.3381	0.246	56.04	0.307	0.393
evm.model.scaffold_185.392.1	0.3871	0.3124	0.264	0.286	56.43	0.468	0.468
evm.model.scaffold_185.400	0.3862	0.3062	0.2683	0.2583	53.05	0.455	0.478
evm.model.scaffold_185.368	0.3598	0.2971	0.3887	0.2051	51.01	0.395	0.446
evm.model.scaffold_185.152	0.1429	0.0612	0.3918	0.5484	25.17	0.523	0.513
evm.model.scaffold_185.10	0.4051	0.2807	0.3765	0.2354	55.13	0.39	0.422
evm.model.scaffold_185.436	0.4406	0.2156	0.3598	0.2987	50.92	0.369	0.405
evm.model.scaffold_185.507	0.4327	0.2449	0.3088	0.2604	50.07	0.389	0.445
evm.model.scaffold_185.407	0.4554	0.2213	0.3122	0.2571	53.29	0.377	0.456
evm.model.scaffold_185.188	0.3359	0.2813	0.354	0.2816	61	0.439	0.486
evm.model.scaffold_185.184	0.3226	0.3602	0.284	0.2867	53.91	0.505	0.474
evm.model.scaffold_185.280	0.4731	0.1808	0.3868	0.2054	47.66	0.3	0.407
evm.model.scaffold_185.107	0.4254	0.2159	0.3289	0.2609	53.42	0.375	0.456
evm.model.scaffold_185.110	0.3837	0.3023	0.3165	0.2449	58.53	0.431	0.445
evm.model.scaffold_185.119	0.4479	0.2471	0.3114	0.2009	49.51	0.364	0.436
evm.model.scaffold_185.170	0.4893	0.1674	0.3192	0.2252	49.59	0.317	0.448
evm.model.scaffold_185.214	0.3846	0.2308	0.2976	0.3457	46.87	0.455	0.462
evm.model.scaffold_185.104	0.5504	0.0966	0.1038	0.4569	36.4	0.425	0.438
evm.model.scaffold_185.59	0.4403	0.2389	0.3191	0.2785	55.18	0.395	0.454
evm.model.scaffold_185.391	0.4611	0.1682	0.3816	0.2994	51.54	0.355	0.425
evm.model.scaffold_185.87	0.4724	0.1656	0.3326	0.2957	53.51	0.347	0.426
evm.model.scaffold_185.187	0.2696	0.3652	0.2745	0.3021	61	0.546	0.506
evm.model.scaffold_185.146	0.5	0.2035	0.2407	0.277	49.24	0.378	0.434
evm.model.scaffold_185.268	0.457	0.2219	0.3509	0.2346	54.17	0.35	0.418
evm.model.scaffold_185.446	0.3503	0.2881	0.3804	0.2105	57.12	0.401	0.484
evm.model.scaffold_185.98	0.425	0.2073	0.4086	0.221	50.75	0.328	0.387
evm.model.scaffold_185.241	0.3536	0.2679	0.2738	0.3386	55.13	0.483	0.51
evm.model.scaffold_185.480	0.3652	0.2528	0.3869	0.3026	51.07	0.412	0.442
evm.model.scaffold_185.337_evm.model.scaffold_185.338	0.4259	0.1667	0.3693	0.2771	56.78	0.356	0.455
evm.model.scaffold_185.158	0.3084	0.3738	0.1826	0.4057	58.17	0.606	0.499
evm.model.scaffold_185.237	0.4521	0.1992	0.3577	0.2821	51.7	0.364	0.418
evm.model.scaffold_185.156	0.4767	0.2578	0.3036	0.2905	49.31	0.408	0.457
evm.model.scaffold_185.335	0.4096	0.2108	0.3289	0.2593	54.89	0.374	0.453
evm.model.scaffold_185.244	0.4794	0.1712	0.382	0.2677	50.08	0.33	0.418
evm.model.scaffold_185.460	0.4062	0.2745	0.3511	0.2559	54.91	0.404	0.435
evm.model.scaffold_185.308	0.3846	0.3231	0.3167	0.2411	59.51	0.439	0.48
evm.model.scaffold_185.7	0.3844	0.2933	0.3317	0.1897	53.58	0.395	0.445
evm.model.scaffold_185.123	0.441	0.2083	0.3875	0.272	53.61	0.356	0.418
evm.model.scaffold_185.19	0.4101	0.2101	0.3745	0.2657	50.08	0.366	0.418
evm.model.scaffold_185.447	0.2078	0.5584	0.2066	0.2373	51.62	0.667	0.566
evm.model.scaffold_185.352	0.375	0.3036	0.3571	0.2396	59.01	0.425	0.451
evm.model.scaffold_185.539	0.4579	0.1869	0.3393	0.271	49.89	0.346	0.421
evm.model.scaffold_185.73	0.4039	0.1971	0.3549	0.1983	53.15	0.333	0.436
evm.model.scaffold_185.364	0.3636	0.3846	0.2051	0.25	52.74	0.522	0.524
evm.model.scaffold_185.275	0.4583	0.2381	0.3185	0.2917	55.69	0.392	0.422
evm.model.scaffold_185.516	0.3965	0.2294	0.3783	0.2484	48.74	0.373	0.443
evm.model.scaffold_185.330	0.4743	0.1938	0.3344	0.2806	51.22	0.358	0.427
evm.model.scaffold_185.71	0.468	0.225	0.3267	0.2623	53.07	0.37	0.435
evm.model.scaffold_185.182	0.3846	0.2418	0.3596	0.2289	49.78	0.38	0.464
evm.model.scaffold_185.202	0.3727	0.2727	0.45	0.1546	44.94	0.344	0.434
evm.model.scaffold_185.250	0.4325	0.225	0.2611	0.2727	49.36	0.403	0.445
evm.model.scaffold_185.358	0.4147	0.2636	0.375	0.2466	50.97	0.384	0.43
evm.model.scaffold_185.20	0.3891	0.2678	0.3727	0.2282	58.21	0.388	0.464
evm.model.scaffold_185.288	0.4826	0.1891	0.2809	0.2842	47.3	0.366	0.42
evm.model.scaffold_185.438	0.4061	0.2515	0.3253	0.3042	52.5	0.416	0.443
evm.model.scaffold_185.437	0.4375	0.2219	0.3602	0.2957	50.99	0.373	0.406
evm.model.scaffold_185.183	0.3783	0.2435	0.2762	0.3112	52.31	0.447	0.446
evm.model.scaffold_185.69	0.4026	0.2812	0.2764	0.3053	58.39	0.447	0.445
evm.model.scaffold_185.473	0.387	0.2568	0.2952	0.3108	51.87	0.442	0.448
evm.model.scaffold_185.61	0.3219	0.3531	0.2237	0.308	52.86	0.54	0.493
evm.model.scaffold_185.317	0.458	0.2443	0.2392	0.2852	51.51	0.417	0.472
evm.model.scaffold_185.74	0.2672	0.3448	0.2752	0.4019	51.63	0.576	0.526
evm.model.scaffold_185.51	0.3185	0.2444	0.404	0.3014	53.74	0.425	0.472
evm.model.scaffold_185.347	0.3303	0.2752	0.3196	0.2935	61	0.46	0.499
evm.model.scaffold_185.401	0.4513	0.2343	0.3344	0.2371	50.24	0.369	0.45
evm.model.scaffold_185.114	0.3644	0.2578	0.36	0.2704	54.8	0.412	0.439
evm.model.scaffold_185.136	0.4134	0.2173	0.3574	0.22	50.26	0.353	0.45
evm.model.scaffold_185.221	0.4868	0.1711	0.4444	0.2656	53.65	0.303	0.356
evm.model.scaffold_185.215	0.3266	0.2283	0.3938	0.2812	50.32	0.409	0.453
evm.model.scaffold_185.327	0.3108	0.2954	0.3883	0.2589	51.81	0.441	0.466
evm.model.scaffold_185.131	0.346	0.3488	0.2561	0.2394	55.79	0.491	0.554
evm.model.scaffold_185.300	0.419	0.2359	0.3272	0.2829	52.78	0.399	0.435
evm.model.scaffold_185.26	0.4	0.2587	0.2882	0.2569	54.41	0.42	0.476
evm.model.scaffold_185.456	0.4651	0.1512	0.3529	0.2525	48.89	0.318	0.42
evm.model.scaffold_185.272	0.4069	0.3438	0.2659	0.2137	46.23	0.448	0.473
evm.model.scaffold_185.521	0.3154	0.39	0.1888	0.4118	53.39	0.607	0.529
evm.model.scaffold_185.367	0.3885	0.2675	0.3382	0.2481	48.42	0.408	0.461
evm.model.scaffold_185.532	0.1751	0.3838	0.1741	0.4823	51.01	0.708	0.588
evm.model.scaffold_185.81	0.4137	0.2289	0.363	0.2547	54.28	0.377	0.42
evm.model.scaffold_185.68	0.3917	0.175	0.3739	0.3094	48.25	0.378	0.42
evm.model.scaffold_185.458	0.4317	0.2268	0.3377	0.2606	52.86	0.378	0.436
evm.model.scaffold_185.58	0.3718	0.3213	0.3361	0.2028	55.73	0.421	0.462
evm.model.scaffold_185.218	0.3087	0.255	0.3231	0.3659	54.67	0.485	0.493
evm.model.scaffold_185.1	0.26	0.455	0.2524	0.1598	49.8	0.537	0.588
evm.model.scaffold_185.416	0.4376	0.2272	0.321	0.26	49.22	0.379	0.437
evm.model.scaffold_185.238	0.3257	0.3257	0.1864	0.4156	54.87	0.582	0.511
evm.model.scaffold_185.222	0.4954	0.1651	0.4404	0.1939	56.91	0.266	0.368
evm.model.scaffold_185.84	0.3921	0.3392	0.2262	0.2254	49.81	0.473	0.542
evm.model.scaffold_185.193	0.3316	0.3112	0.3121	0.2848	58.42	0.474	0.494
evm.model.scaffold_185.30	0.1429	0.4176	0.1957	0.5217	42.53	0.735	0.587
evm.model.scaffold_185.165	0.309	0.3511	0.3009	0.3259	52.34	0.515	0.457
evm.model.scaffold_185.90	0.4264	0.2453	0.356	0.2609	53.83	0.382	0.423
evm.model.scaffold_185.270	0.35	0.2846	0.3514	0.272	53.93	0.438	0.491
evm.model.scaffold_185.15	0.2941	0.4037	0.2011	0.3258	54.41	0.591	0.531
evm.model.scaffold_185.512	0.4012	0.2965	0.3217	0.229	56.3	0.413	0.46
evm.model.scaffold_185.89	0.4337	0.3133	0.2778	0.1894	48.04	0.407	0.441
evm.model.scaffold_185.159	0.428	0.232	0.318	0.3202	54.53	0.417	0.459
evm.model.scaffold_185.354	0.4386	0.2886	0.3062	0.2944	56.28	0.429	0.441
evm.model.scaffold_185.361	0.3636	0.292	0.2833	0.3487	55.95	0.495	0.469
evm.model.scaffold_185.313	0.4984	0.1713	0.3241	0.2283	50.4	0.322	0.475
evm.model.scaffold_185.63	0.3837	0.3656	0.1713	0.2989	50.63	0.534	0.507
evm.model.scaffold_185.349	0.4248	0.281	0.354	0.2143	53.42	0.379	0.423
evm.model.scaffold_185.491	0.3349	0.3578	0.1981	0.3469	51.62	0.562	0.517
evm.model.scaffold_185.369	0.2826	0.387	0.2737	0.2866	50	0.538	0.476
evm.model.scaffold_185.145	0.163	0.4056	0.2717	0.4052	50.1	0.646	0.551
evm.model.scaffold_185.277	0.4586	0.198	0.3571	0.284	52.34	0.358	0.431
evm.model.scaffold_185.200	0.4394	0.2291	0.3769	0.2052	50.9	0.34	0.434
evm.model.scaffold_185.504	0.4383	0.2257	0.356	0.2382	53.61	0.359	0.44
evm.model.scaffold_185.149	0.1818	0.0606	0.3366	0.5625	29.47	0.536	0.505
evm.model.scaffold_185.14	0.4745	0.2237	0.3591	0.2068	51.76	0.332	0.428
evm.model.scaffold_185.172	0.4059	0.2277	0.3953	0.3086	43.61	0.39	0.388
evm.model.scaffold_185.257	0.416	0.252	0.2864	0.315	57.17	0.43	0.431
evm.model.scaffold_185.96	0.4583	0.2604	0.2018	0.4732	40.37	0.538	0.482
evm.model.scaffold_185.18	0.2464	0.4734	0.1786	0.3043	56.08	0.645	0.587
evm.model.scaffold_185.453	0.4511	0.2256	0.2	0.3858	40.74	0.479	0.493
evm.model.scaffold_185.478	0.1645	0.5329	0.1935	0.3802	48.89	0.722	0.608
evm.model.scaffold_185.388	0.4615	0.1888	0.3548	0.2	51.93	0.308	0.416
evm.model.scaffold_185.78	0.4146	0.3049	0.3226	0.3276	56.84	0.449	0.431
evm.model.scaffold_185.302	0.3069	0.2673	0.4	0.2353	55.01	0.411	0.483
evm.model.scaffold_185.322	0.35	0.38	0.253	0.2208	61	0.495	0.464
evm.model.scaffold_185.351	0.3728	0.2633	0.3257	0.2852	58.58	0.43	0.47
evm.model.scaffold_185.157	0.2136	0.3398	0.25	0.4299	51.17	0.618	0.546
evm.model.scaffold_185.529	0.4249	0.2403	0.3308	0.2857	51.76	0.399	0.424
evm.model.scaffold_185.387	0.404	0.18	0.3689	0.2208	50.73	0.334	0.485
evm.model.scaffold_185.194	0.4005	0.2069	0.3932	0.2548	51.35	0.36	0.434
evm.model.scaffold_185.227	0.4545	0.1612	0.4215	0.3005	48.31	0.329	0.381
evm.model.scaffold_185.36	0.3615	0.3065	0.2471	0.316	55	0.495	0.477
evm.model.scaffold_185.423	0.4078	0.1942	0.3579	0.2907	52.65	0.372	0.448
evm.model.scaffold_185.195	0.4832	0.255	0.2331	0.252	48.85	0.401	0.441
evm.model.scaffold_185.306	0.4433	0.2291	0.3279	0.2839	49.56	0.387	0.424
evm.model.scaffold_185.233	0.1935	0.5194	0.218	0.2982	41.82	0.664	0.585
evm.model.scaffold_185.371	0.3647	0.2471	0.403	0.3115	47.47	0.408	0.37
evm.model.scaffold_185.162	0.426	0.2321	0.3971	0.2019	48.42	0.338	0.411
evm.model.scaffold_185.260	0.457	0.2102	0.3191	0.2759	53.8	0.373	0.443
evm.model.scaffold_185.40	0.2708	0.4417	0.2783	0.2222	45.53	0.551	0.522
evm.model.scaffold_185.79	0.349	0.434	0.1517	0.3233	43.74	0.593	0.506
evm.model.scaffold_185.271	0.3974	0.2564	0.2632	0.3636	43.15	0.464	0.453
evm.model.scaffold_185.179	0.2857	0.4286	0.2479	0.2981	53.14	0.566	0.489
evm.model.scaffold_185.382	0.4601	0.1534	0.3902	0.2375	50.5	0.312	0.445
evm.model.scaffold_185.94	0.3129	0.3256	0.2821	0.3158	58.31	0.51	0.493
evm.model.scaffold_185.121	0.4553	0.1844	0.2006	0.3855	49.88	0.456	0.459
evm.model.scaffold_185.385	0.0966	0.6761	0.1	0.3529	37.15	0.84	0.64
evm.model.scaffold_185.97	0.3704	0.2901	0.2994	0.2431	44.55	0.434	0.457
evm.model.scaffold_185.134	0.475	0.225	0.274	0.3906	51.47	0.426	0.413
evm.model.scaffold_185.66_evm.model.scaffold_185.67	0.4899	0.1902	0.3771	0.2474	52.54	0.325	0.426
evm.model.scaffold_185.409	0.3579	0.3684	0.2716	0.2667	43.19	0.495	0.46
evm.model.scaffold_185.463	0.5	0.0909	0.3631	0.236	43.84	0.261	0.408
evm.model.scaffold_185.374	0.5176	0.1514	0.327	0.0769	47.47	0.213	0.605
evm.model.scaffold_185.42	0.4031	0.2857	0.3072	0.245	53.82	0.417	0.442
evm.model.scaffold_185.547	0.428	0.2353	0.3758	0.2322	52.46	0.359	0.427
evm.model.scaffold_185.201	0.3846	0.1429	0.2043	0.5341	40.2	0.526	0.496
evm.model.scaffold_185.544	0.411	0.2761	0.3775	0.2431	53.99	0.392	0.443
evm.model.scaffold_185.459.1	0.3763	0.2581	0.3054	0.2829	54.23	0.429	0.423
evm.model.scaffold_185.489	0.2912	0.4794	0.1135	0.36	48.56	0.667	0.571
evm.model.scaffold_185.77	0.4279	0.1674	0.4419	0.271	50.83	0.334	0.429
evm.model.scaffold_185.372	0.2011	0.3598	0.1264	0.4888	45.6	0.718	0.621
evm.model.scaffold_185.102	0.4131	0.2278	0.2691	0.3446	54.75	0.455	0.48
evm.model.scaffold_185.124	0.4213	0.2276	0.2831	0.3047	52.34	0.421	0.498
evm.model.scaffold_185.50	0.3691	0.3519	0.267	0.2644	56.59	0.486	0.475
evm.model.scaffold_185.211	0.3822	0.3556	0.2379	0.3	49.81	0.51	0.491
evm.model.scaffold_185.100	0.396	0.2617	0.3285	0.2581	59.19	0.406	0.415
evm.model.scaffold_185.198	0.464	0.197	0.3643	0.195	50.75	0.315	0.437
evm.model.scaffold_185.154	0.4168	0.2236	0.3193	0.2784	55.81	0.396	0.457
evm.model.scaffold_185.133	0.3972	0.2194	0.3593	0.2192	52.1	0.352	0.427
evm.model.scaffold_185.197	0.4103	0.3007	0.2618	0.2934	55.18	0.457	0.481
evm.model.scaffold_185.109	0.3899	0.2706	0.3568	0.2151	57.38	0.388	0.428
evm.model.scaffold_185.92	0.3708	0.2884	0.3205	0.3277	53.81	0.46	0.438
evm.model.scaffold_185.72	0.4233	0.203	0.3575	0.2605	50.28	0.359	0.43
evm.model.scaffold_185.434	0.4025	0.3056	0.2723	0.2892	53.6	0.457	0.439
evm.model.scaffold_185.379	0.4387	0.2454	0.3427	0.2079	52.04	0.361	0.443
evm.model.scaffold_185.204	0.4625	0.2156	0.3804	0.2578	56.89	0.341	0.402
evm.model.scaffold_185.31	0.3463	0.2557	0.447	0.2128	49.08	0.364	0.411
evm.model.scaffold_185.360	0.329	0.29	0.2304	0.3523	53.91	0.523	0.496
evm.model.scaffold_185.503	0.3059	0.2588	0.3918	0.2857	49.69	0.429	0.491
evm.model.scaffold_185.143	0.3027	0.466	0.1605	0.2944	49.32	0.616	0.545
evm.model.scaffold_185.242	0.4004	0.2176	0.3236	0.2309	51.77	0.369	0.449
evm.model.scaffold_185.135	0.3366	0.2673	0.3333	0.3444	57.46	0.468	0.485
evm.model.scaffold_185.57	0.4233	0.2614	0.2625	0.3469	52.9	0.46	0.452
evm.model.scaffold_185.432	0.2806	0.3885	0.2403	0.3065	60.9	0.568	0.553
evm.model.scaffold_185.230	0.2587	0.2736	0.261	0.4772	54.94	0.592	0.529
evm.model.scaffold_185.167	0.479	0.1597	0.2993	0.3107	49.53	0.364	0.44
evm.model.scaffold_185.44	0.487	0.213	0.2807	0.2507	54.3	0.358	0.423
evm.model.scaffold_185.472	0.4072	0.2635	0.2635	0.2671	56.77	0.437	0.471
evm.model.scaffold_185.8	0.4359	0.2393	0.2232	0.3551	58	0.465	0.469
evm.model.scaffold_185.320	0.3563	0.325	0.3371	0.2659	58.03	0.456	0.458
evm.model.scaffold_185.137	0.3663	0.1683	0.3675	0.3805	54.36	0.429	0.429
evm.model.scaffold_185.383	0.4524	0.2024	0.3312	0.2549	49.91	0.361	0.493
evm.model.scaffold_185.461	0.3133	0.3193	0.2842	0.3714	58.87	0.527	0.471
evm.model.scaffold_185.256	0.4087	0.2262	0.4314	0.2145	51.76	0.34	0.423
evm.model.scaffold_185.430	0.3767	0.2363	0.3989	0.2213	49.42	0.363	0.456
evm.model.scaffold_185.291	0.3323	0.3234	0.3506	0.2581	49.49	0.451	0.45
evm.model.scaffold_185.261	0.406	0.2343	0.3314	0.271	54.43	0.398	0.46
evm.model.scaffold_185.185	0.3669	0.2662	0.3556	0.2607	58.97	0.41	0.43
evm.model.scaffold_185.75	0.2767	0.3467	0.2096	0.3964	56.43	0.597	0.542
evm.model.scaffold_185.426	0.402	0.3355	0.2586	0.2344	45.66	0.46	0.485
evm.model.scaffold_185.506	0.3824	0.3824	0.1893	0.271	57.19	0.522	0.474
evm.model.scaffold_185.248	0.4899	0.1879	0.2976	0.3106	42.27	0.388	0.443
evm.model.scaffold_185.24	0.4645	0.1754	0.401	0.2235	50.74	0.306	0.432
evm.model.scaffold_185.527	0.2072	0.5676	0.2292	0.1648	40.43	0.634	0.565
evm.model.scaffold_185.433	0.4136	0.2583	0.2749	0.2688	56.14	0.424	0.48
evm.model.scaffold_185.373	0.2113	0.3803	0.1268	0.529	56.99	0.726	0.606
evm.model.scaffold_185.118	0.4347	0.1937	0.2929	0.2513	54.12	0.368	0.469
evm.model.scaffold_185.267	0.3514	0.2703	0.3593	0.2642	56.76	0.424	0.445
evm.model.scaffold_185.130	0.3471	0.3223	0.2843	0.3368	53.09	0.5	0.434
evm.model.scaffold_185.469	0.4657	0.194	0.3191	0.2749	50.98	0.365	0.431
evm.model.scaffold_185.366	0.3833	0.2907	0.2863	0.3116	50	0.463	0.455
evm.model.scaffold_185.112	0.4143	0.1714	0.3431	0.2769	53.3	0.364	0.464
evm.model.scaffold_185.60	0.4061	0.2848	0.2721	0.223	58.5	0.422	0.491
evm.model.scaffold_185.520	0.4793	0.2562	0.2212	0.3021	52.62	0.426	0.437
evm.model.scaffold_185.263	0.4364	0.2273	0.3	0.3034	49.82	0.4	0.429
evm.model.scaffold_185.231	0.4148	0.2963	0.2424	0.2656	51.33	0.457	0.516
evm.model.scaffold_185.292	0.455	0.2027	0.3386	0.2588	53.41	0.35	0.426
evm.model.scaffold_185.334	0.3069	0.3432	0.2376	0.2931	57.34	0.534	0.548
evm.model.scaffold_185.166	0.4671	0.1974	0.2868	0.3282	46.83	0.399	0.438
evm.model.scaffold_185.217	0.358	0.3201	0.3333	0.1851	52.64	0.419	0.451
evm.model.scaffold_185.345	0.4655	0.199	0.3232	0.2845	50.59	0.36	0.397
evm.model.scaffold_185.142	0.4202	0.2821	0.2555	0.2552	55.41	0.434	0.469
evm.model.scaffold_185.127	0.2464	0.4374	0.1667	0.3616	50.49	0.652	0.562
evm.model.scaffold_185.25	0.4753	0.2141	0.3669	0.2596	49.42	0.351	0.399
evm.model.scaffold_185.199	0.3456	0.2521	0.4325	0.2268	51.51	0.378	0.444
evm.model.scaffold_185.474	0.4569	0.2349	0.3291	0.2147	54.07	0.351	0.438
evm.model.scaffold_185.431	0.4572	0.2168	0.2964	0.2851	50.46	0.383	0.419
evm.model.scaffold_185.53	0.4702	0.2131	0.2938	0.2613	50.78	0.372	0.443
evm.model.scaffold_185.276	0.4132	0.2851	0.2589	0.2514	53.96	0.432	0.451
evm.model.scaffold_185.408	0.4668	0.2088	0.3083	0.2754	49.06	0.375	0.441
evm.model.scaffold_185.41	0.4209	0.2272	0.3056	0.2686	54.13	0.396	0.476
evm.model.scaffold_185.517	0.4181	0.2821	0.3333	0.2117	55.85	0.385	0.427
evm.model.scaffold_185.395	0.4404	0.2094	0.2481	0.3269	50.12	0.432	0.478
evm.model.scaffold_185.286	0.3684	0.2932	0.2595	0.2913	60.05	0.478	0.483
evm.model.scaffold_185.173	0.4068	0.2458	0.4286	0.1961	47.61	0.338	0.41
evm.model.scaffold_185.65	0.3419	0.2538	0.3141	0.2823	48.9	0.437	0.467
evm.model.scaffold_185.287	0.4128	0.2039	0.3425	0.2086	48.89	0.34	0.44
evm.model.scaffold_185.356	0.4221	0.2223	0.3143	0.2691	52.09	0.386	0.437
evm.model.scaffold_185.253	0.3828	0.25	0.4058	0.2206	52.45	0.371	0.465
evm.model.scaffold_185.252	0.3357	0.3286	0.2418	0.3517	49.93	0.536	0.512
evm.model.scaffold_185.21_evm.model.scaffold_185.22	0.3504	0.2863	0.3333	0.271	56.93	0.443	0.499
evm.model.scaffold_185.12_evm.model.scaffold_185.13	0.4771	0.1634	0.3376	0.2789	53.02	0.345	0.454
evm.model.scaffold_185.139	0.3648	0.2876	0.3455	0.2732	52.23	0.433	0.466
evm.model.scaffold_185.471	0.2784	0.3239	0.3276	0.35	59.65	0.516	0.486
evm.model.scaffold_185.393	0.2159	0.418	0.216	0.3587	54.09	0.639	0.569
evm.model.scaffold_185.88	0.3264	0.3333	0.3459	0.1638	55.69	0.419	0.44
evm.model.scaffold_185.93	0.4492	0.2344	0.286	0.3084	50.84	0.41	0.437
evm.model.scaffold_185.76	0.3711	0.2956	0.3018	0.255	54.76	0.44	0.493
evm.model.scaffold_185.196	0.4422	0.1973	0.3686	0.234	52.95	0.335	0.436
evm.model.scaffold_185.470	0.1222	0.5481	0.0849	0.4115	38.71	0.82	0.653
evm.model.scaffold_185.435	0.42	0.2575	0.2949	0.2995	54.91	0.432	0.475
evm.model.scaffold_185.344	0.4526	0.1971	0.3471	0.2087	55.43	0.329	0.422
evm.model.scaffold_185.380	0.1688	0.5473	0.1495	0.3773	43.55	0.741	0.581
evm.model.scaffold_185.155	0.305	0.3031	0.3353	0.2839	50.85	0.47	0.467
evm.model.scaffold_185.220	0.398	0.1837	0.3789	0.2747	50.12	0.364	0.425
evm.model.scaffold_185.224	0.3226	0.3333	0.3171	0.2564	44.74	0.477	0.49
evm.model.scaffold_185.493	0.18	0.555	0.1033	0.3391	43.98	0.756	0.63
evm.model.scaffold_185.294	0.386	0.2321	0.3402	0.3149	53.97	0.419	0.438
evm.model.scaffold_185.168	0.1496	0.6282	0.1318	0.299	37.13	0.765	0.613
evm.model.scaffold_185.398	0.3746	0.281	0.3472	0.2807	57.89	0.432	0.46
evm.model.scaffold_185.83	0.4051	0.3231	0.227	0.2404	47.19	0.469	0.534
evm.model.scaffold_185.321	0.4356	0.2493	0.3285	0.2247	52.94	0.373	0.445
evm.model.scaffold_185.95	0.3769	0.1846	0.4338	0.25	52.72	0.341	0.423
evm.model.scaffold_185.52	0.1905	0.6952	0.1034	0.2317	37.08	0.76	0.568
evm.model.scaffold_185.161	0.4694	0.2204	0.2702	0.3182	50.03	0.405	0.435
evm.model.scaffold_185.298	0.438	0.219	0.3209	0.2419	45.11	0.368	0.444
evm.model.scaffold_185.343	0.4271	0.224	0.3273	0.2838	55.67	0.396	0.48
evm.model.scaffold_185.23	0.2967	0.2925	0.2333	0.4228	54.25	0.571	0.526
evm.model.scaffold_185.210	0.4779	0.1654	0.3581	0.2633	49.35	0.335	0.441
evm.model.scaffold_185.11	0.3934	0.26	0.3432	0.2633	54.21	0.404	0.413
evm.model.scaffold_185.297	0.4503	0.1637	0.3466	0.303	52.93	0.361	0.433
evm.model.scaffold_185.309	0.4215	0.2369	0.3312	0.2644	51.95	0.389	0.44
evm.model.scaffold_185.389	0.4234	0.2387	0.3684	0.2529	46.56	0.372	0.416
evm.model.scaffold_185.108	0.4609	0.2609	0.2073	0.3291	61	0.444	0.444
evm.model.scaffold_185.519	0.3515	0.288	0.3785	0.248	54.66	0.418	0.449
evm.model.scaffold_185.209	0.4386	0.2052	0.3326	0.2718	53	0.366	0.428
evm.model.scaffold_185.475	0.4167	0.2	0.366	0.3189	46.88	0.394	0.426
evm.model.scaffold_185.342	0.4289	0.2284	0.2924	0.3115	55.4	0.421	0.481
evm.model.scaffold_185.333	0.3593	0.3196	0.3079	0.2556	57.19	0.457	0.486
evm.model.scaffold_185.101	0.4667	0.219	0.3936	0.2127	50.76	0.327	0.408
evm.model.scaffold_185.455	0.4118	0.2206	0.3471	0.3303	47.37	0.402	0.415
evm.model.scaffold_185.311	0.4248	0.1327	0.376	0.3388	51.81	0.371	0.439
evm.model.scaffold_185.213	0.3571	0.2302	0.3734	0.2838	50.67	0.406	0.443
evm.model.scaffold_185.147	0.3918	0.231	0.3411	0.2185	49.86	0.368	0.442
evm.model.scaffold_185.219	0.4084	0.3194	0.1481	0.34	54.23	0.523	0.476
evm.model.scaffold_185.304	0.423	0.2212	0.3385	0.2943	52.11	0.396	0.447
evm.model.scaffold_185.483	0.3636	0.2703	0.25	0.3304	56.66	0.48	0.471
evm.model.scaffold_185.91	0.3544	0.2848	0.3179	0.2797	55.12	0.45	0.465
evm.model.scaffold_185.508	0.2256	0.3872	0.1761	0.4477	49.52	0.669	0.568
evm.model.scaffold_185.402	0.3804	0.2935	0.2571	0.4479	47.62	0.53	0.444
evm.model.scaffold_185.365	0.3415	0.3211	0.2837	0.2821	55.15	0.484	0.49
evm.model.scaffold_185.126	0.3739	0.2522	0.3012	0.2681	54.38	0.429	0.484
evm.model.scaffold_185.171	0.3333	0.2632	0.3548	0.2761	51.85	0.423	0.418
evm.model.scaffold_185.223	0.4411	0.2274	0.3628	0.2292	53.9	0.349	0.416
evm.model.scaffold_185.405	0.3798	0.2448	0.396	0.237	51.06	0.375	0.42
evm.model.scaffold_185.49	0.4632	0.2075	0.3154	0.2484	51.28	0.357	0.441
evm.model.scaffold_185.239	0.4984	0.1738	0.3422	0.23	50.87	0.314	0.433
evm.model.scaffold_185.5	0.3943	0.2745	0.3397	0.1947	51.59	0.381	0.44
evm.model.scaffold_185.419	0.4109	0.2984	0.3239	0.2	51.62	0.401	0.44
evm.model.scaffold_185.495	0.2913	0.2184	0.3871	0.3381	53.86	0.446	0.489
evm.model.scaffold_185.160	0.4538	0.2692	0.2596	0.2451	51.97	0.411	0.547
evm.model.scaffold_185.341	0.4045	0.2921	0.284	0.2078	49.78	0.416	0.497
evm.model.scaffold_185.289	0.3952	0.2336	0.3539	0.2685	51.77	0.388	0.423
evm.model.scaffold_185.62	0.35	0.375	0.1746	0.3624	53.3	0.57	0.467
evm.model.scaffold_185.359	0.229	0.4161	0.1079	0.5287	46.97	0.726	0.566
evm.model.scaffold_185.316	0.31	0.39	0.3125	0.2379	57.96	0.504	0.486
evm.model.scaffold_185.449	0.4044	0.1944	0.3362	0.2565	49.9	0.365	0.454
evm.model.scaffold_185.530	0.4363	0.2046	0.3284	0.2683	52.39	0.37	0.436
evm.model.scaffold_185.545	0.418	0.2578	0.3431	0.3122	51.04	0.417	0.421
evm.model.scaffold_185.175	0.3775	0.2203	0.4023	0.2304	50.41	0.36	0.452
evm.model.scaffold_185.174	0.5122	0.1789	0.367	0.2255	52.94	0.304	0.383
evm.model.scaffold_185.468	0.3554	0.2169	0.3656	0.3409	50.11	0.43	0.437
evm.model.scaffold_185.103	0.423	0.2437	0.2896	0.3168	51.03	0.427	0.458
evm.model.scaffold_185.399.1	0.3564	0.2561	0.3619	0.2885	52.53	0.424	0.435
evm.model.scaffold_185.362.1	0.2521	0.3504	0.2707	0.3641	53.28	0.571	0.544
evm.model.scaffold_185.9	0.3256	0.3488	0.3712	0.2419	50.15	0.452	0.424
evm.model.scaffold_185.243	0.4269	0.1762	0.3511	0.249	51.84	0.347	0.475
evm.model.scaffold_185.303	0.4094	0.2785	0.3123	0.2794	58.54	0.424	0.438
evm.model.scaffold_185.457	0.4242	0.2045	0.3946	0.2172	52.43	0.332	0.437
evm.model.scaffold_185.418	0.3318	0.3363	0.3169	0.2151	56.95	0.459	0.48
evm.model.scaffold_185.355	0.4427	0.1927	0.3261	0.2229	48.95	0.338	0.422
evm.model.scaffold_185.228	0.4219	0.3438	0.2931	0.1275	49.96	0.393	0.428
evm.model.scaffold_185.502	0.3074	0.3	0.2016	0.3976	55.23	0.573	0.568
evm.model.scaffold_185.370	0.3068	0.358	0.2739	0.3425	51.11	0.538	0.49
evm.model.scaffold_185.450	0.4549	0.1885	0.3542	0.2888	52.79	0.366	0.449
evm.model.scaffold_185.56	0.3867	0.2928	0.2983	0.2826	56.31	0.445	0.473
evm.model.scaffold_185.511	0.3558	0.3558	0.2081	0.3345	51.65	0.54	0.494
evm.model.scaffold_185.54	0.3621	0.2759	0.3309	0.3154	57.57	0.456	0.465
evm.model.scaffold_185.410	0.2883	0.2945	0.4497	0.2727	49.64	0.421	0.427
evm.model.scaffold_185.278	0.3027	0.293	0.2538	0.3579	58.85	0.532	0.552
evm.model.scaffold_287.4	0.478	0.1761	0.3255	0.2612	53.38	0.336	0.433
evm.model.scaffold_287.3	0.4533	0.2318	0.2814	0.3233	51.28	0.409	0.444
evm.model.scaffold_287.5.1	0.4491	0.1847	0.3774	0.2981	52.37	0.362	0.409
evm.model.scaffold_287.1	0.3427	0.3147	0.2701	0.3385	57.5	0.507	0.485
evm.model.scaffold_35.82	0.4198	0.226	0.3679	0.185	49.74	0.336	0.445
evm.model.scaffold_35.1161	0.3139	0.3358	0.2566	0.2404	49.64	0.497	0.499
evm.model.scaffold_35.30	0.4484	0.1973	0.3623	0.2969	50.47	0.366	0.427
evm.model.scaffold_35.330	0.4152	0.1988	0.4076	0.2098	52.4	0.322	0.42
evm.model.scaffold_35.873	0.4745	0.2462	0.227	0.3204	46.6	0.438	0.456
evm.model.scaffold_35.309	0.3115	0.3279	0.4249	0.276	52.96	0.446	0.427
evm.model.scaffold_35.1064	0.3641	0.337	0.2135	0.2722	52.36	0.507	0.52
evm.model.scaffold_35.905	0.4354	0.2338	0.3528	0.1927	54.3	0.345	0.42
evm.model.scaffold_35.152	0.321	0.2593	0.4605	0.2353	47.34	0.378	0.401
evm.model.scaffold_35.1151	0.4387	0.2	0.331	0.35	51.82	0.408	0.454
evm.model.scaffold_35.449	0.4275	0.2217	0.3416	0.2518	54.83	0.368	0.411
evm.model.scaffold_35.631	0.4686	0.1802	0.3622	0.2791	50.08	0.344	0.417
evm.model.scaffold_35.417	0.4096	0.2048	0.3784	0.2464	49.44	0.354	0.427
evm.model.scaffold_35.872	0.3426	0.2639	0.3786	0.2881	50.65	0.422	0.437
evm.model.scaffold_35.89	0.3304	0.2783	0.38	0.2747	43.65	0.429	0.412
evm.model.scaffold_35.548	0.0816	0.6122	0.1798	0.3086	29.82	0.78	0.597
evm.model.scaffold_35.436	0.422	0.1835	0.3448	0.2294	48.35	0.344	0.448
evm.model.scaffold_35.192	0.4928	0.1667	0.2913	0.313	57.63	0.36	0.44
evm.model.scaffold_35.141	0.4454	0.1891	0.3607	0.2899	57.9	0.362	0.42
evm.model.scaffold_35.713	0.4884	0.2326	0.2703	0.2258	52.32	0.354	0.403
evm.model.scaffold_35.1176	0.44	0.144	0.3947	0.269	49.21	0.331	0.454
evm.model.scaffold_35.1079	0.4663	0.1604	0.3873	0.3072	49.65	0.349	0.45
evm.model.scaffold_35.719	0.3333	0.3367	0.244	0.2603	50.66	0.505	0.549
evm.model.scaffold_35.400	0.3474	0.2917	0.272	0.307	56.67	0.476	0.473
evm.model.scaffold_35.1185	0.4397	0.227	0.2962	0.252	54.18	0.385	0.449
evm.model.scaffold_35.753	0.42	0.09	0.3542	0.2556	42.46	0.296	0.442
evm.model.scaffold_35.254	0.5022	0.1905	0.3458	0.262	45.54	0.329	0.381
evm.model.scaffold_35.608	0.16	0.72	0.1184	0.3	34.47	0.788	0.536
evm.model.scaffold_35.697	0.4398	0.1885	0.4146	0.242	48.93	0.327	0.425
evm.model.scaffold_35.302	0.4656	0.1527	0.375	0.2871	52.14	0.322	0.398
evm.model.scaffold_35.545	0.3902	0.2363	0.3633	0.2481	50.45	0.378	0.415
evm.model.scaffold_35.21	0.2445	0.4017	0.2308	0.3567	54.54	0.602	0.502
evm.model.scaffold_35.273	0.46	0.228	0.3128	0.2813	52.82	0.38	0.404
evm.model.scaffold_35.266	0.5227	0.1288	0.3182	0.3465	41.65	0.333	0.39
evm.model.scaffold_35.307	0.3591	0.332	0.3489	0.2768	50.63	0.458	0.434
evm.model.scaffold_35.369	0.4721	0.2193	0.3106	0.2523	53.6	0.363	0.436
evm.model.scaffold_35.427	0.4944	0.2472	0.375	0.1493	53.53	0.311	0.384
evm.model.scaffold_35.94	0.5061	0.2073	0.2581	0.3169	53.95	0.391	0.444
evm.model.scaffold_35.957	0.4545	0.3636	0.2133	0.2429	51.98	0.469	0.44
evm.model.scaffold_35.177	0.4318	0.2386	0.3415	0.2215	57.51	0.362	0.437
evm.model.scaffold_35.349	0.4164	0.2356	0.3713	0.2434	47.68	0.364	0.416
evm.model.scaffold_35.1077	0.3724	0.4138	0.1579	0.178	54.26	0.519	0.533
evm.model.scaffold_35.110	0.4223	0.2289	0.3313	0.2626	51.76	0.38	0.42
evm.model.scaffold_35.296	0.4958	0.1708	0.3729	0.2478	50.27	0.319	0.412
evm.model.scaffold_35.834	0.4468	0.2482	0.1865	0.3506	47.54	0.466	0.467
evm.model.scaffold_35.297.1	0.3542	0.2708	0.3936	0.2584	54.92	0.408	0.462
evm.model.scaffold_35.878	0.4238	0.2429	0.25	0.3364	53.02	0.459	0.476
evm.model.scaffold_35.1136	0.2857	0.4031	0.1526	0.4041	50.66	0.639	0.542
evm.model.scaffold_35.1081	0.5097	0.1613	0.4196	0.1694	47.92	0.249	0.361
evm.model.scaffold_35.34	0.3348	0.3004	0.274	0.2984	56.83	0.485	0.49
evm.model.scaffold_35.304	0.4409	0.1613	0.4021	0.3556	41.13	0.37	0.385
evm.model.scaffold_35.318	0.4191	0.2483	0.374	0.2557	56.54	0.379	0.443
evm.model.scaffold_35.958	0.4161	0.2516	0.2753	0.261	58.81	0.416	0.496
evm.model.scaffold_35.176	0.3311	0.3907	0.2264	0.4	51.07	0.585	0.519
evm.model.scaffold_35.1026	0.447	0.2159	0.3471	0.1991	53.04	0.336	0.444
evm.model.scaffold_35.354	0.4474	0.1814	0.3888	0.2593	51.62	0.334	0.426
evm.model.scaffold_35.646	0.3974	0.2788	0.3294	0.2652	50.78	0.417	0.441
evm.model.scaffold_35.709	0.3862	0.2966	0.2901	0.2613	51.78	0.434	0.415
evm.model.scaffold_35.301	0.3943	0.2602	0.4128	0.2523	53.71	0.382	0.404
evm.model.scaffold_35.416	0.1864	0.5545	0.1709	0.2872	45.07	0.701	0.6
evm.model.scaffold_35.283	0.3797	0.1646	0.3974	0.3649	51.88	0.396	0.444
evm.model.scaffold_35.689	0.4724	0.1575	0.2167	0.3729	42.78	0.427	0.468
evm.model.scaffold_35.113	0.4658	0.2192	0.3507	0.3031	55.54	0.383	0.441
evm.model.scaffold_35.955	0.2751	0.4709	0.2346	0.2616	57.58	0.588	0.527
evm.model.scaffold_35.1124	0.5294	0.1412	0.4494	0.175	46.15	0.234	0.365
evm.model.scaffold_35.285	0.417	0.2165	0.3316	0.325	53.75	0.412	0.453
evm.model.scaffold_35.1059	0.4618	0.2233	0.2731	0.3152	53.47	0.411	0.461
evm.model.scaffold_35.383	0.3699	0.2985	0.3472	0.2395	52.51	0.422	0.452
evm.model.scaffold_35.1090	0.3289	0.1842	0.3333	0.369	59.62	0.455	0.482
evm.model.scaffold_35.248	0.3921	0.3132	0.2769	0.2693	50.36	0.457	0.443
evm.model.scaffold_35.298	0.4331	0.2413	0.2941	0.2508	53.31	0.395	0.476
evm.model.scaffold_35.16	0.4091	0.2297	0.3408	0.2025	52.41	0.354	0.405
evm.model.scaffold_35.1139	0.4758	0.1801	0.3092	0.2429	49.96	0.343	0.463
evm.model.scaffold_35.1104	0.4923	0.1676	0.3663	0.198	47.83	0.292	0.422
evm.model.scaffold_35.911	0.4228	0.245	0.2519	0.2771	44.98	0.426	0.472
evm.model.scaffold_35.760	0.4173	0.2218	0.3592	0.2	59.46	0.339	0.43
evm.model.scaffold_35.386	0.4219	0.1772	0.4115	0.2227	49.2	0.316	0.437
evm.model.scaffold_35.342	0.4231	0.1731	0.3228	0.3298	48.37	0.391	0.43
evm.model.scaffold_35.659	0.3932	0.3846	0.2752	0.297	61	0.497	0.466
evm.model.scaffold_35.948	0.4464	0.1746	0.3681	0.2427	44.54	0.323	0.396
evm.model.scaffold_35.539	0.4608	0.2028	0.3655	0.1848	45.56	0.312	0.422
evm.model.scaffold_35.112	0.4041	0.2238	0.3814	0.197	50.64	0.335	0.415
evm.model.scaffold_35.522	0.3012	0.2129	0.2716	0.4298	55.67	0.517	0.529
evm.model.scaffold_35.53	0.3196	0.3465	0.2527	0.2583	58.36	0.507	0.497
evm.model.scaffold_35.749	0.4343	0.2072	0.3541	0.1989	49.43	0.327	0.425
evm.model.scaffold_35.477	0.4565	0.2079	0.3511	0.2578	52.72	0.358	0.448
evm.model.scaffold_35.695	0.4503	0.1948	0.3614	0.2601	51.87	0.35	0.436
evm.model.scaffold_35.712	0.4236	0.25	0.3543	0.2072	52.93	0.358	0.411
evm.model.scaffold_35.411	0.4366	0.23	0.2969	0.2931	46.31	0.4	0.425
evm.model.scaffold_35.55	0.4779	0.1691	0.2712	0.3243	48.67	0.378	0.42
evm.model.scaffold_35.1016	0.4296	0.2	0.4961	0.1899	43.03	0.289	0.368
evm.model.scaffold_35.404	0.4175	0.1845	0.3158	0.375	50.45	0.416	0.433
evm.model.scaffold_35.101	0.4224	0.2708	0.343	0.1991	53.44	0.375	0.445
evm.model.scaffold_35.138	0.28	0.288	0.3846	0.3119	52.34	0.467	0.437
evm.model.scaffold_35.495	0.3186	0.2566	0.4464	0.2952	50.02	0.411	0.44
evm.model.scaffold_35.469	0.4055	0.2384	0.3569	0.2318	51.18	0.369	0.431
evm.model.scaffold_35.917	0.4643	0.2619	0.2468	0.2568	46.07	0.414	0.538
evm.model.scaffold_35.803	0.4645	0.2198	0.3053	0.2234	47.57	0.359	0.471
evm.model.scaffold_35.1027	0.3992	0.2674	0.3656	0.2341	54.77	0.386	0.445
evm.model.scaffold_35.1132	0.5238	0.2571	0.2872	0.1818	52.71	0.344	0.426
evm.model.scaffold_35.213	0.4512	0.2348	0.322	0.2045	52.09	0.357	0.483
evm.model.scaffold_35.933	0.2744	0.3659	0.2545	0.3333	55.35	0.56	0.488
evm.model.scaffold_35.168	0.4303	0.2353	0.2295	0.3474	54.39	0.456	0.487
evm.model.scaffold_35.906	0.409	0.2319	0.3871	0.2042	50.8	0.347	0.42
evm.model.scaffold_35.227	0.2955	0.375	0.2791	0.3214	51.71	0.545	0.508
evm.model.scaffold_35.507	0.4405	0.2026	0.3619	0.2462	50.28	0.348	0.418
evm.model.scaffold_35.782	0.4385	0.2095	0.3526	0.2557	53.32	0.359	0.443
evm.model.scaffold_35.1181	0.4892	0.1519	0.3392	0.2653	47.62	0.33	0.446
evm.model.scaffold_35.643	0.4398	0.1639	0.4257	0.222	47.87	0.296	0.418
evm.model.scaffold_35.772	0.4941	0.1412	0.4158	0.2526	48.67	0.3	0.399
evm.model.scaffold_35.855	0.3689	0.2233	0.3711	0.2791	51.43	0.388	0.415
evm.model.scaffold_35.413.1	0.4099	0.2333	0.327	0.2794	49.62	0.406	0.461
evm.model.scaffold_35.593	0.3604	0.3019	0.3196	0.263	57.54	0.446	0.441
evm.model.scaffold_35.947	0.4468	0.234	0.2958	0.2104	54.14	0.365	0.467
evm.model.scaffold_35.103	0.4397	0.2414	0.3	0.2364	49.58	0.383	0.465
evm.model.scaffold_35.999	0.3306	0.3548	0.36	0.3158	53.28	0.49	0.465
evm.model.scaffold_35.692	0.4693	0.1844	0.3727	0.2419	50.42	0.326	0.415
evm.model.scaffold_35.733	0.3945	0.3119	0.3333	0.25	46.18	0.427	0.438
evm.model.scaffold_35.119	0.4231	0.2769	0.3793	0.165	48.75	0.349	0.391
evm.model.scaffold_35.683	0.4282	0.2746	0.3129	0.2	46.49	0.383	0.443
evm.model.scaffold_35.244	0.4409	0.2244	0.3197	0.2383	49.36	0.373	0.45
evm.model.scaffold_35.243	0.4453	0.1642	0.3669	0.2489	50.88	0.326	0.423
evm.model.scaffold_35.451	0.4392	0.1882	0.324	0.3515	52.62	0.406	0.415
evm.model.scaffold_35.931	0.2957	0.2174	0.28	0.4624	49.74	0.523	0.485
evm.model.scaffold_35.953	0.3969	0.2672	0.4439	0.1684	52.81	0.337	0.415
evm.model.scaffold_35.907	0.4492	0.2217	0.2358	0.3787	51.56	0.459	0.471
evm.model.scaffold_35.61	0.314	0.375	0.2095	0.3878	56.44	0.583	0.501
evm.model.scaffold_35.338	0.4329	0.1463	0.3988	0.3313	47.64	0.358	0.399
evm.model.scaffold_35.105	0.4938	0.1688	0.3937	0.2039	51.43	0.29	0.44
evm.model.scaffold_35.1046	0.3764	0.2952	0.3643	0.3086	57.65	0.439	0.428
evm.model.scaffold_35.796	0.4096	0.2289	0.3738	0.2509	47.91	0.367	0.415
evm.model.scaffold_35.542	0.4333	0.2606	0.3698	0.2054	49.22	0.363	0.431
evm.model.scaffold_35.848	0.3779	0.2995	0.2809	0.2532	52.02	0.443	0.435
evm.model.scaffold_35.1001	0.4395	0.2579	0.3657	0.2453	56.13	0.375	0.442
evm.model.scaffold_35.837	0.3877	0.2074	0.4356	0.2336	50.23	0.337	0.41
evm.model.scaffold_35.974	0.3917	0.3417	0.2727	0.3333	51.01	0.497	0.487
evm.model.scaffold_35.195	0.4159	0.2064	0.4047	0.2292	47.59	0.336	0.411
evm.model.scaffold_35.489	0.3887	0.3298	0.2696	0.2419	55.3	0.459	0.459
evm.model.scaffold_35.197	0.4746	0.2126	0.3587	0.223	50.57	0.332	0.424
evm.model.scaffold_35.239	0.4711	0.1963	0.3461	0.2192	49.83	0.325	0.423
evm.model.scaffold_35.172	0.3719	0.3554	0.2525	0.2418	56.7	0.481	0.48
evm.model.scaffold_35.305	0.4553	0.2062	0.3383	0.258	53.08	0.359	0.446
evm.model.scaffold_35.556	0.429	0.2	0.4349	0.2635	53.91	0.333	0.381
evm.model.scaffold_35.600	0.1897	0.4784	0.2367	0.33	50.06	0.656	0.571
evm.model.scaffold_35.832	0.4228	0.1944	0.3975	0.2277	53.7	0.334	0.45
evm.model.scaffold_35.478	0.4463	0.2562	0.2931	0.2259	51.7	0.383	0.453
evm.model.scaffold_35.820	0.1854	0.5534	0.0931	0.3859	42.48	0.766	0.601
evm.model.scaffold_35.209	0.4115	0.2109	0.3502	0.227	51.62	0.354	0.443
evm.model.scaffold_35.86	0.3722	0.2361	0.2919	0.2929	55.3	0.423	0.436
evm.model.scaffold_35.1075	0.3724	0.4138	0.1579	0.178	54.26	0.519	0.533
evm.model.scaffold_35.121	0.3875	0.1625	0.4539	0.25	42.57	0.314	0.379
evm.model.scaffold_35.1021	0.4457	0.2109	0.3278	0.2423	52.59	0.359	0.447
evm.model.scaffold_35.23	0.3237	0.2488	0.3186	0.3726	52.47	0.493	0.49
evm.model.scaffold_35.1014	0.422	0.1965	0.4012	0.3268	55.59	0.375	0.416
evm.model.scaffold_35.381	0.4252	0.243	0.3953	0.1013	53.4	0.3	0.424
evm.model.scaffold_35.870	0.4185	0.2423	0.2333	0.4124	47.87	0.484	0.447
evm.model.scaffold_35.188	0.3951	0.2901	0.2697	0.3022	52.91	0.459	0.448
evm.model.scaffold_35.463	0.4054	0.2973	0.241	0.2368	46.22	0.44	0.497
evm.model.scaffold_35.130.3	0.4689	0.1969	0.3396	0.2603	51.67	0.345	0.421
evm.model.scaffold_35.392	0.4203	0.1739	0.3284	0.3385	46.31	0.4	0.484
evm.model.scaffold_35.586	0.3607	0.3973	0.3089	0.2222	50.8	0.479	0.458
evm.model.scaffold_35.943	0.4796	0.2347	0.2222	0.25	40.31	0.387	0.424
evm.model.scaffold_35.11	0.1288	0.5833	0.0938	0.4917	37.4	0.824	0.612
evm.model.scaffold_35.36	0.3874	0.253	0.3582	0.2617	57.76	0.403	0.49
evm.model.scaffold_35.747	0.4171	0.2211	0.3563	0.2241	48.2	0.352	0.418
evm.model.scaffold_35.510	0.4541	0.1907	0.3299	0.2353	51.32	0.344	0.449
evm.model.scaffold_35.100	0.3892	0.202	0.2916	0.3634	55.92	0.444	0.443
evm.model.scaffold_35.578	0.4881	0.2299	0.2951	0.1429	54.42	0.32	0.537
evm.model.scaffold_35.1041	0.4251	0.2104	0.3807	0.2346	49.68	0.346	0.442
evm.model.scaffold_35.186	0.3741	0.2517	0.4173	0.2089	50.7	0.359	0.405
evm.model.scaffold_35.234	0.4576	0.1642	0.3528	0.2865	51.42	0.351	0.461
evm.model.scaffold_35.559	0.4202	0.2437	0.3362	0.2212	56.8	0.378	0.479
evm.model.scaffold_35.465	0.4444	0.2005	0.3504	0.3352	47.77	0.394	0.421
evm.model.scaffold_35.574	0.3497	0.2568	0.3401	0.3131	55.81	0.439	0.459
evm.model.scaffold_35.641	0.4263	0.2316	0.2529	0.3125	48.6	0.431	0.466
evm.model.scaffold_35.1028	0.1932	0.5341	0.1932	0.3765	45.77	0.699	0.595
evm.model.scaffold_35.670	0.2696	0.3525	0.2596	0.3813	54.02	0.575	0.515
evm.model.scaffold_35.714	0.4578	0.1928	0.3684	0.2308	55.59	0.32	0.426
evm.model.scaffold_35.128	0.3473	0.2678	0.3647	0.3208	53.97	0.445	0.424
evm.model.scaffold_35.166	0.4192	0.2677	0.2542	0.2579	53.11	0.423	0.46
evm.model.scaffold_35.420	0.443	0.2325	0.2953	0.2443	51.1	0.378	0.405
evm.model.scaffold_35.902	0.3349	0.3558	0.2566	0.2784	57.65	0.51	0.506
evm.model.scaffold_35.287	0.3962	0.283	0.3965	0.2019	51.3	0.377	0.416
evm.model.scaffold_35.602	0.4458	0.1928	0.3861	0.2069	44.33	0.315	0.419
evm.model.scaffold_35.490	0.4044	0.2404	0.2819	0.3667	43.51	0.464	0.455
evm.model.scaffold_35.407	0.3294	0.2941	0.2326	0.3333	53.14	0.52	0.524
evm.model.scaffold_35.502	0.4307	0.2448	0.3231	0.3085	51.9	0.409	0.419
evm.model.scaffold_35.986	0.1899	0.2785	0.3708	0.3523	47.05	0.525	0.542
evm.model.scaffold_35.224	0.3849	0.255	0.3912	0.2064	48.21	0.368	0.424
evm.model.scaffold_35.871	0.4858	0.2241	0.2674	0.2024	51.15	0.351	0.459
evm.model.scaffold_35.620	0.3562	0.2466	0.3817	0.28	54.77	0.41	0.46
evm.model.scaffold_35.1058	0.3783	0.2322	0.3829	0.249	49.91	0.376	0.444
evm.model.scaffold_35.1145	0.4897	0.2066	0.3095	0.2462	52.5	0.347	0.427
evm.model.scaffold_35.62	0.3614	0.3133	0.2308	0.3649	57.85	0.525	0.464
evm.model.scaffold_35.808	0.3513	0.2516	0.3755	0.288	52.03	0.417	0.437
evm.model.scaffold_35.679	0.4572	0.2353	0.3249	0.2516	54.01	0.371	0.452
evm.model.scaffold_35.1101	0.4016	0.3092	0.3248	0.2396	53.91	0.423	0.451
evm.model.scaffold_35.268	0.4532	0.1608	0.3456	0.247	50.54	0.318	0.416
evm.model.scaffold_35.1189	0.2885	0.2115	0.4352	0.3301	46.17	0.421	0.431
evm.model.scaffold_35.626	0.4955	0.2024	0.2469	0.2797	49.6	0.388	0.478
evm.model.scaffold_35.263	0.3213	0.1667	0.4909	0.1169	40.7	0.256	0.483
evm.model.scaffold_35.78	0.435	0.23	0.2189	0.3525	52.2	0.455	0.466
evm.model.scaffold_35.694.1	0.377	0.2322	0.293	0.246	53.11	0.412	0.489
evm.model.scaffold_35.378	0.3879	0.2975	0.352	0.2467	57.62	0.416	0.446
evm.model.scaffold_35.242	0.4761	0.1458	0.3737	0.4025	46.41	0.392	0.403
evm.model.scaffold_35.13	0.3043	0.3913	0.2757	0.2857	59.7	0.536	0.502
evm.model.scaffold_35.784_evm.model.scaffold_35.785	0.5013	0.1688	0.3035	0.3234	48.75	0.353	0.411
evm.model.scaffold_35.630	0.3624	0.289	0.3169	0.2941	51.71	0.452	0.466
evm.model.scaffold_35.710	0.3136	0.3644	0.3421	0.233	60.24	0.469	0.449
evm.model.scaffold_35.286	0.4617	0.2219	0.3275	0.2898	50.16	0.386	0.425
evm.model.scaffold_35.1074	0.3987	0.2142	0.3769	0.2564	52.13	0.37	0.438
evm.model.scaffold_35.985	0.3684	0.3008	0.1885	0.4348	50	0.556	0.473
evm.model.scaffold_35.289	0.5	0.1389	0.31	0.2283	41.7	0.298	0.435
evm.model.scaffold_35.611	0.4444	0.2	0.3218	0.2706	55.25	0.376	0.467
evm.model.scaffold_35.540	0.2647	0.3309	0.2813	0.3252	52.6	0.541	0.537
evm.model.scaffold_35.612	0.4775	0.1517	0.284	0.358	43.64	0.39	0.441
evm.model.scaffold_35.421	0.5484	0.0968	0.2432	0.3475	40.09	0.346	0.435
evm.model.scaffold_35.566	0.358	0.2469	0.3462	0.2917	42.46	0.423	0.394
evm.model.scaffold_35.373	0.445	0.1914	0.3488	0.2549	51.83	0.352	0.439
evm.model.scaffold_35.236	0.2642	0.5094	0.24	0.2165	39.09	0.591	0.561
evm.model.scaffold_35.756	0.4062	0.235	0.3355	0.2633	54.14	0.394	0.466
evm.model.scaffold_35.445	0.3644	0.2915	0.3323	0.2465	57.1	0.425	0.446
evm.model.scaffold_35.448	0.3446	0.322	0.2424	0.3526	56.03	0.526	0.509
evm.model.scaffold_35.757	0.4669	0.1703	0.3344	0.2919	53.56	0.356	0.445
evm.model.scaffold_35.315	0.4271	0.2604	0.3133	0.3117	61	0.422	0.444
evm.model.scaffold_35.347	0.3833	0.2944	0.3711	0.2772	54.96	0.424	0.439
evm.model.scaffold_35.38.5	0.4417	0.2109	0.2938	0.3542	53.54	0.424	0.429
evm.model.scaffold_35.752	0.4016	0.1885	0.3547	0.27	53.21	0.363	0.43
evm.model.scaffold_35.941	0.3131	0.1616	0.3229	0.3889	43.47	0.451	0.507
evm.model.scaffold_35.844	0.3585	0.2604	0.2622	0.3494	47.46	0.489	0.495
evm.model.scaffold_35.403	0.3548	0.2258	0.3426	0.42	45.2	0.474	0.423
evm.model.scaffold_35.663	0.398	0.2143	0.3873	0.3082	49.79	0.386	0.416
evm.model.scaffold_35.290	0.45	0.175	0.3814	0.2857	41.1	0.349	0.398
evm.model.scaffold_35.481	0.452	0.256	0.3226	0.199	49.59	0.365	0.463
evm.model.scaffold_35.320	0.1882	0.5353	0.1959	0.3333	43.25	0.692	0.566
evm.model.scaffold_35.145	0.3754	0.2405	0.3705	0.2308	49.14	0.381	0.445
evm.model.scaffold_35.69	0.3426	0.3454	0.3275	0.2753	53.47	0.472	0.446
evm.model.scaffold_35.667	0.4193	0.1941	0.4273	0.246	48.39	0.333	0.408
evm.model.scaffold_35.1025	0.331	0.3627	0.3388	0.2098	54.66	0.459	0.455
evm.model.scaffold_35.1037	0.6198	0.1364	0.2828	0.2247	44.17	0.262	0.411
evm.model.scaffold_35.690	0.3252	0.2577	0.2617	0.4113	50.71	0.521	0.497
evm.model.scaffold_35.397	0.3647	0.3176	0.2237	0.3582	53.42	0.515	0.443
evm.model.scaffold_35.1005	0.1709	0.5427	0.1503	0.3757	45.67	0.736	0.593
evm.model.scaffold_35.1108	0.3448	0.2819	0.3855	0.21	54	0.396	0.452
evm.model.scaffold_35.1166	0.5149	0.1881	0.3238	0.2632	61	0.338	0.413
evm.model.scaffold_35.1164	0.43	0.24	0.4028	0.2754	55.11	0.374	0.402
evm.model.scaffold_35.162	0.4626	0.2098	0.303	0.2868	52.44	0.376	0.436
evm.model.scaffold_35.564	0.4397	0.2695	0.344	0.1935	54.34	0.371	0.475
evm.model.scaffold_35.864.1	0.4206	0.2148	0.351	0.3003	51.83	0.387	0.431
evm.model.scaffold_35.245	0.4216	0.2761	0.3107	0.3118	53.94	0.438	0.435
evm.model.scaffold_35.1022.2	0.4405	0.2202	0.35	0.2305	54.71	0.355	0.45
evm.model.scaffold_35.171	0.3586	0.3249	0.3021	0.2393	59.36	0.457	0.476
evm.model.scaffold_35.618	0.4026	0.2922	0.2761	0.1883	51.22	0.405	0.446
evm.model.scaffold_35.535	0.4534	0.2242	0.3081	0.2478	53.82	0.372	0.459
evm.model.scaffold_35.575	0.328	0.336	0.2574	0.3333	55.67	0.525	0.503
evm.model.scaffold_35.909.2	0.5043	0.1923	0.2857	0.2961	47.03	0.368	0.424
evm.model.scaffold_35.674	0.4161	0.2192	0.3015	0.2541	53.9	0.385	0.46
evm.model.scaffold_35.362	0.3713	0.2704	0.3905	0.2262	50.83	0.388	0.428
evm.model.scaffold_35.123	0.3488	0.3488	0.1839	0.3875	46.39	0.57	0.456
evm.model.scaffold_35.660	0.4047	0.2441	0.2879	0.3455	47.5	0.445	0.437
evm.model.scaffold_35.743	0.4807	0.1718	0.3407	0.233	50.16	0.318	0.409
evm.model.scaffold_35.671	0.4665	0.221	0.33	0.2823	49.46	0.374	0.427
evm.model.scaffold_35.802	0.3467	0.2688	0.3934	0.247	50.53	0.403	0.417
evm.model.scaffold_35.1019	0.4333	0.2889	0.2165	0.4149	43.86	0.52	0.454
evm.model.scaffold_35.875	0.4158	0.1474	0.4727	0.2617	49.97	0.315	0.422
evm.model.scaffold_35.682	0.44	0.232	0.3362	0.2556	49.48	0.378	0.44
evm.model.scaffold_35.321	0.42	0.224	0.3033	0.2284	53.22	0.378	0.498
evm.model.scaffold_35.20	0.4068	0.2881	0.3348	0.2036	55.87	0.395	0.476
evm.model.scaffold_35.1131	0.4254	0.2169	0.3705	0.2396	53.8	0.356	0.442
evm.model.scaffold_35.382	0.3829	0.2359	0.4178	0.2166	53.96	0.354	0.432
evm.model.scaffold_35.881	0.3902	0.3598	0.3032	0.1626	53.39	0.43	0.467
evm.model.scaffold_35.269	0.4119	0.2075	0.4063	0.2239	47.96	0.337	0.416
evm.model.scaffold_35.673	0.2011	0.4693	0.2154	0.3377	49.05	0.655	0.544
evm.model.scaffold_35.786	0.4268	0.2077	0.3846	0.2479	50.12	0.352	0.421
evm.model.scaffold_35.861	0.2889	0.2	0.378	0.3836	45.76	0.447	0.429
evm.model.scaffold_35.47	0.4257	0.277	0.304	0.2735	56.2	0.42	0.473
evm.model.scaffold_35.849	0.2353	0.2689	0.2232	0.4182	46.38	0.595	0.641
evm.model.scaffold_35.1175	0.4692	0.1692	0.3846	0.1653	51.15	0.275	0.456
evm.model.scaffold_35.592	0.4767	0.2275	0.2854	0.2824	52.3	0.386	0.437
evm.model.scaffold_35.500	0.3774	0.2432	0.4361	0.25	50.67	0.368	0.415
evm.model.scaffold_35.1044	0.3925	0.3082	0.2773	0.3003	53.66	0.464	0.441
evm.model.scaffold_35.821	0.3895	0.2187	0.3804	0.2632	52.35	0.373	0.437
evm.model.scaffold_35.255	0.4578	0.1807	0.2797	0.3511	52.08	0.396	0.425
evm.model.scaffold_35.499	0.4306	0.2917	0.3107	0.1747	46.96	0.383	0.471
evm.model.scaffold_35.157	0.5226	0.2258	0.3224	0.2162	46.97	0.34	0.415
evm.model.scaffold_35.621	0.3012	0.3052	0.3365	0.3503	42.89	0.498	0.449
evm.model.scaffold_35.253	0.3201	0.4214	0.1483	0.3537	50.8	0.612	0.532
evm.model.scaffold_35.932	0.2632	0.3355	0.3033	0.3571	61	0.542	0.497
evm.model.scaffold_35.853	0.405	0.2273	0.4036	0.2564	51.15	0.358	0.387
evm.model.scaffold_35.41	0.3077	0.3147	0.4387	0.2209	49.01	0.413	0.434
evm.model.scaffold_35.292	0.4064	0.1873	0.3682	0.3243	48.88	0.385	0.415
evm.model.scaffold_35.1127	0.3885	0.1894	0.389	0.2547	50.05	0.346	0.4
evm.model.scaffold_35.1133	0.3984	0.1951	0.4569	0.2523	53.12	0.338	0.426
evm.model.scaffold_35.343	0.4002	0.2065	0.3209	0.3614	53.26	0.437	0.466
evm.model.scaffold_35.711	0.4041	0.2877	0.3101	0.2315	56.57	0.404	0.405
evm.model.scaffold_35.1062	0.0317	0.0476	0.1321	0.8381	29.02	0.85	0.681
evm.model.scaffold_35.1072	0.4431	0.245	0.3324	0.2553	56.92	0.383	0.441
evm.model.scaffold_35.165	0.472	0.1863	0.3197	0.2806	53.78	0.359	0.44
evm.model.scaffold_35.466	0.433	0.2309	0.3254	0.2121	52.45	0.361	0.46
evm.model.scaffold_35.12	0.4012	0.2326	0.3384	0.2477	53.68	0.38	0.441
evm.model.scaffold_35.95	0.3154	0.3154	0.2657	0.3321	56.58	0.519	0.499
evm.model.scaffold_35.544	0.4151	0.2325	0.342	0.225	51.68	0.366	0.421
evm.model.scaffold_35.498	0.4386	0.2018	0.3402	0.3182	49.57	0.381	0.411
evm.model.scaffold_35.668	0.2148	0.5259	0.187	0.322	42.88	0.677	0.569
evm.model.scaffold_35.472	0.3836	0.2956	0.2911	0.3793	53.79	0.488	0.445
evm.model.scaffold_35.731	0.2645	0.2149	0.5	0.2368	45.51	0.363	0.434
evm.model.scaffold_35.185	0.4061	0.1921	0.2457	0.3705	52.88	0.458	0.496
evm.model.scaffold_35.96	0.4448	0.2146	0.3552	0.2379	50.12	0.352	0.423
evm.model.scaffold_35.379	0.456	0.208	0.2523	0.3267	48.06	0.413	0.493
evm.model.scaffold_35.729	0.4679	0.1881	0.3053	0.2826	53.45	0.368	0.47
evm.model.scaffold_35.894	0.3902	0.3636	0.3045	0.1576	50.45	0.43	0.468
evm.model.scaffold_35.581.1	0.4536	0.2131	0.3305	0.2156	57.43	0.341	0.425
evm.model.scaffold_35.267	0.4171	0.2581	0.3416	0.2676	47.5	0.4	0.423
evm.model.scaffold_35.25	0.2971	0.3902	0.2381	0.2595	53.29	0.543	0.515
evm.model.scaffold_35.751	0.423	0.1802	0.3692	0.2484	53.38	0.337	0.414
evm.model.scaffold_35.346	0.4361	0.2124	0.3504	0.2914	52.06	0.375	0.405
evm.model.scaffold_35.792	0.5387	0.1589	0.3286	0.2382	49.14	0.309	0.441
evm.model.scaffold_35.520	0.3584	0.2601	0.3526	0.2973	53.99	0.432	0.45
evm.model.scaffold_35.205	0.2986	0.3561	0.265	0.2818	61	0.526	0.538
evm.model.scaffold_35.76	0.3664	0.2691	0.3115	0.28	51.06	0.437	0.446
evm.model.scaffold_35.279	0.4267	0.2267	0.3079	0.3003	52.9	0.403	0.431
evm.model.scaffold_35.926	0.2662	0.3052	0.2168	0.4148	59.28	0.589	0.537
evm.model.scaffold_35.780	0.3098	0.282	0.3173	0.3899	52.74	0.504	0.443
evm.model.scaffold_35.328	0.3358	0.3097	0.3465	0.2679	55.29	0.451	0.447
evm.model.scaffold_35.758	0.462	0.2222	0.25	0.3355	50.52	0.425	0.444
evm.model.scaffold_35.528	0.4161	0.2548	0.3221	0.246	51.53	0.394	0.414
evm.model.scaffold_35.942	0.4387	0.2395	0.3447	0.2661	52.67	0.381	0.433
evm.model.scaffold_35.443	0.37	0.2379	0.3807	0.2808	51.5	0.399	0.431
evm.model.scaffold_35.187	0.3746	0.2667	0.444	0.1688	46.94	0.346	0.403
evm.model.scaffold_35.536	0.427	0.1622	0.2978	0.3393	55.36	0.397	0.444
evm.model.scaffold_35.293	0.5115	0.1739	0.2994	0.257	48.85	0.33	0.408
evm.model.scaffold_35.108	0.4727	0.2412	0.3542	0.2119	51.3	0.346	0.435
evm.model.scaffold_35.217.2	0.4134	0.2004	0.3426	0.3395	50.35	0.404	0.428
evm.model.scaffold_35.601	0.4031	0.2713	0.3871	0.2203	48.39	0.379	0.442
evm.model.scaffold_35.547	0.2756	0.3799	0.1992	0.4159	53.5	0.616	0.529
evm.model.scaffold_35.122	0.3922	0.2353	0.3956	0.1923	51.68	0.339	0.392
evm.model.scaffold_35.329	0.5191	0.1421	0.3059	0.2722	44.71	0.319	0.405
evm.model.scaffold_35.262	0.3795	0.2803	0.3784	0.2669	52.83	0.412	0.414
evm.model.scaffold_35.116	0.4873	0.1921	0.3739	0.2096	49.4	0.308	0.412
evm.model.scaffold_35.823	0.494	0.1796	0.2414	0.314	47.16	0.392	0.526
evm.model.scaffold_35.850	0.4209	0.2401	0.3799	0.2431	49.29	0.361	0.396
evm.model.scaffold_35.1094	0.3687	0.3017	0.2912	0.355	52.89	0.489	0.461
evm.model.scaffold_35.744	0.4577	0.1385	0.3715	0.2616	51.13	0.315	0.418
evm.model.scaffold_35.142	0.3836	0.2201	0.3929	0.308	51.11	0.396	0.422
evm.model.scaffold_35.561	0.3611	0.287	0.3407	0.2099	54.89	0.407	0.406
evm.model.scaffold_35.367	0.3231	0.3026	0.2612	0.3836	56.02	0.523	0.464
evm.model.scaffold_35.992	0.4132	0.1974	0.3831	0.2781	53.13	0.366	0.443
evm.model.scaffold_35.252	0.429	0.2131	0.3557	0.231	51.65	0.356	0.474
evm.model.scaffold_35.419	0.3293	0.2622	0.3086	0.3379	52.02	0.469	0.467
evm.model.scaffold_35.1020	0.3427	0.243	0.4073	0.2667	53.97	0.396	0.425
evm.model.scaffold_35.231	0.3395	0.3727	0.2883	0.2969	54.52	0.509	0.468
evm.model.scaffold_35.155	0.4198	0.2191	0.3727	0.246	59.06	0.358	0.413
evm.model.scaffold_35.66	0.3846	0.2244	0.3553	0.2462	46.19	0.37	0.414
evm.model.scaffold_35.761	0.4296	0.2222	0.4	0.1695	49.6	0.316	0.437
evm.model.scaffold_35.235	0.3737	0.2789	0.3465	0.2102	57.72	0.399	0.466
evm.model.scaffold_35.284	0.4505	0.239	0.2733	0.2053	51.88	0.364	0.424
evm.model.scaffold_35.633	0.3793	0.3678	0.3378	0.2687	60.78	0.463	0.464
evm.model.scaffold_35.691	0.1694	0.5806	0.1204	0.3238	38.5	0.757	0.648
evm.model.scaffold_35.977	0.4699	0.203	0.3851	0.2454	48.86	0.336	0.395
evm.model.scaffold_35.765	0.3445	0.3684	0.2217	0.337	48.18	0.543	0.487
evm.model.scaffold_35.39	0.4295	0.2442	0.3088	0.2953	54.16	0.408	0.445
evm.model.scaffold_35.144	0.329	0.3811	0.2613	0.2509	50.33	0.512	0.504
evm.model.scaffold_35.79	0.4167	0.2061	0.3223	0.2857	60.92	0.383	0.457
evm.model.scaffold_35.1067	0.4201	0.197	0.3519	0.2387	51.8	0.353	0.458
evm.model.scaffold_35.150	0.3971	0.2647	0.3673	0.2264	60.76	0.386	0.474
evm.model.scaffold_35.818	0.4439	0.2063	0.3578	0.2673	51.63	0.361	0.431
evm.model.scaffold_35.88	0.3894	0.2538	0.2776	0.3077	55.73	0.448	0.492
evm.model.scaffold_35.311	0.4348	0.2446	0.3514	0.2208	52.12	0.363	0.428
evm.model.scaffold_35.372	0.4368	0.1868	0.3788	0.2846	51.91	0.362	0.436
evm.model.scaffold_35.1076	0.3994	0.2062	0.3869	0.261	51.42	0.366	0.428
evm.model.scaffold_35.787	0.3787	0.2769	0.3434	0.216	48.55	0.397	0.431
evm.model.scaffold_35.143	0.4749	0.1605	0.347	0.2358	50.11	0.311	0.435
evm.model.scaffold_35.281	0.4184	0.2342	0.3246	0.2908	53.74	0.4	0.428
evm.model.scaffold_35.1008	0.4075	0.2226	0.2935	0.3035	54.63	0.417	0.458
evm.model.scaffold_35.67	0.4234	0.2482	0.3357	0.2782	47.26	0.403	0.432
evm.model.scaffold_35.1100	0.2155	0.5668	0.157	0.2799	42.43	0.693	0.55
evm.model.scaffold_35.87	0.5028	0.1525	0.3636	0.2273	47.64	0.299	0.434
evm.model.scaffold_35.129	0.4258	0.2473	0.2939	0.2919	49.76	0.419	0.442
evm.model.scaffold_35.622	0.3214	0.3143	0.1903	0.3761	53.65	0.558	0.521
evm.model.scaffold_35.908	0.3554	0.2671	0.3699	0.2133	52.48	0.389	0.423
evm.model.scaffold_35.49	0.4241	0.2384	0.3048	0.2595	55.97	0.392	0.461
evm.model.scaffold_35.952	0.4206	0.2056	0.3866	0.2717	51.43	0.366	0.439
evm.model.scaffold_35.335.1	0.4554	0.2123	0.3714	0.2008	49.73	0.324	0.419
evm.model.scaffold_35.450	0.4181	0.2273	0.3385	0.2387	53.99	0.37	0.415
evm.model.scaffold_35.355	0.6	0.1	0.3882	0.1852	52.13	0.212	0.413
evm.model.scaffold_35.44	0.454	0.1989	0.3376	0.2625	52.83	0.362	0.448
evm.model.scaffold_35.805	0.3257	0.2912	0.377	0.3318	55.79	0.459	0.436
evm.model.scaffold_35.198	0.4785	0.1914	0.3155	0.2739	52.15	0.365	0.468
evm.model.scaffold_35.764	0.3571	0.3714	0.2069	0.3315	49.95	0.543	0.487
evm.model.scaffold_35.99	0.497	0.1941	0.2867	0.2887	50.23	0.369	0.416
evm.model.scaffold_35.351	0.2596	0.3234	0.4115	0.148	50.94	0.417	0.505
evm.model.scaffold_35.721	0.5048	0.1048	0.3646	0.3297	48.06	0.318	0.425
evm.model.scaffold_35.568	0.4	0.2239	0.3846	0.2183	50.97	0.349	0.408
evm.model.scaffold_35.919	0.1789	0.4526	0.3061	0.2766	60.92	0.595	0.567
evm.model.scaffold_35.852	0.397	0.2513	0.2132	0.3533	55	0.487	0.509
evm.model.scaffold_35.703.1	0.4718	0.2177	0.2833	0.2304	52.81	0.362	0.446
evm.model.scaffold_35.135	0.4573	0.2369	0.2874	0.236	52.31	0.38	0.473
evm.model.scaffold_35.793	0.4016	0.2126	0.3604	0.2264	53.01	0.359	0.499
evm.model.scaffold_35.84	0.3954	0.2319	0.3306	0.2883	52.83	0.405	0.442
evm.model.scaffold_35.550	0.3941	0.2516	0.3102	0.3393	52.23	0.439	0.408
evm.model.scaffold_35.833	0.5286	0.1908	0.2929	0.2924	49.15	0.356	0.429
evm.model.scaffold_35.624	0.4672	0.2418	0.2692	0.2751	54.86	0.395	0.447
evm.model.scaffold_35.488	0.4943	0.1034	0.236	0.4494	43.5	0.434	0.494
evm.model.scaffold_35.344	0.3238	0.2857	0.3596	0.3125	55.28	0.455	0.433
evm.model.scaffold_35.675	0.2458	0.4186	0.1536	0.4211	50.39	0.67	0.552
evm.model.scaffold_35.202	0.3707	0.2568	0.2828	0.3213	55.62	0.452	0.463
evm.model.scaffold_35.15	0.3283	0.3245	0.3363	0.281	56.67	0.471	0.494
evm.model.scaffold_35.1129	0.34	0.308	0.2489	0.3349	55.78	0.51	0.511
evm.model.scaffold_35.414	0.4638	0.1913	0.42	0.1513	49.05	0.276	0.433
evm.model.scaffold_35.629	0.4211	0.2737	0.3381	0.2358	53.84	0.393	0.451
evm.model.scaffold_35.461	0.4976	0.1756	0.2947	0.3132	47.99	0.371	0.446
evm.model.scaffold_35.19	0.4403	0.2642	0.2772	0.2415	52.99	0.403	0.476
evm.model.scaffold_35.348	0.4047	0.2471	0.3316	0.2689	57.46	0.402	0.444
evm.model.scaffold_35.1102	0.4426	0.1824	0.3457	0.2362	52.24	0.337	0.464
evm.model.scaffold_35.85	0.4	0.2167	0.3045	0.2522	49.36	0.38	0.425
evm.model.scaffold_35.1130	0.327	0.3188	0.3306	0.2611	53.63	0.458	0.461
evm.model.scaffold_35.1070	0.4079	0.1535	0.36	0.2976	55.43	0.356	0.418
evm.model.scaffold_35.1048	0.4262	0.2548	0.321	0.2423	52.05	0.389	0.444
evm.model.scaffold_35.840	0.3939	0.197	0.4031	0.2751	49.02	0.36	0.418
evm.model.scaffold_35.924	0.3486	0.3028	0.2883	0.2981	56.8	0.478	0.518
evm.model.scaffold_35.755	0.1128	0.3609	0.2066	0.5175	47.71	0.728	0.618
evm.model.scaffold_35.946	0.4197	0.2179	0.3835	0.2073	52.81	0.338	0.435
evm.model.scaffold_35.408	0.4294	0.2034	0.325	0.2789	42.25	0.376	0.447
evm.model.scaffold_35.181	0.3186	0.4779	0.0789	0.4854	41.34	0.698	0.525
evm.model.scaffold_35.653	0.4512	0.2178	0.2676	0.2786	48.59	0.395	0.454
evm.model.scaffold_35.874	0.4312	0.2139	0.375	0.2703	53.34	0.365	0.408
evm.model.scaffold_35.226	0.3866	0.2639	0.2491	0.4015	49.36	0.504	0.474
evm.model.scaffold_35.319	0.3838	0.1351	0.295	0.3015	40.33	0.395	0.616
evm.model.scaffold_35.1150	0.4004	0.2146	0.3085	0.348	55.86	0.437	0.475
evm.model.scaffold_35.3	0.3956	0.2711	0.3263	0.2759	60.42	0.421	0.461
evm.model.scaffold_35.190	0.4235	0.2118	0.3041	0.319	54.4	0.415	0.451
evm.model.scaffold_35.1171	0.4299	0.2448	0.2844	0.2952	54.82	0.423	0.457
evm.model.scaffold_35.847	0.3695	0.2463	0.4188	0.2469	50.18	0.367	0.398
evm.model.scaffold_35.745	0.3508	0.3306	0.368	0.2512	53.27	0.442	0.466
evm.model.scaffold_35.971	0.3917	0.3086	0.2254	0.2955	52.48	0.481	0.495
evm.model.scaffold_35.1040	0.4933	0.24	0.3857	0.194	55.69	0.326	0.41
evm.model.scaffold_35.737	0.5178	0.1937	0.3198	0.2167	49.57	0.325	0.475
evm.model.scaffold_35.846	0.3864	0.2642	0.3052	0.2748	53.63	0.424	0.435
evm.model.scaffold_35.401	0.4694	0.2095	0.3549	0.2908	51.89	0.369	0.423
evm.model.scaffold_35.115	0.4529	0.2238	0.3188	0.2512	53.53	0.368	0.44
evm.model.scaffold_35.371	0.4555	0.1937	0.4078	0.2342	53.96	0.316	0.389
evm.model.scaffold_35.811	0.4072	0.2455	0.4014	0.2727	51.31	0.377	0.421
evm.model.scaffold_35.806	0.3493	0.3013	0.3744	0.2579	55.9	0.431	0.453
evm.model.scaffold_35.788	0.3782	0.2953	0.2367	0.275	53.66	0.472	0.469
evm.model.scaffold_35.8	0.3757	0.2486	0.3182	0.3099	58.25	0.433	0.46
evm.model.scaffold_35.688	0.3857	0.1857	0.2706	0.4699	52.73	0.51	0.506
evm.model.scaffold_35.458	0.367	0.3028	0.2299	0.3506	52.92	0.508	0.463
evm.model.scaffold_35.1057	0.4253	0.2529	0.4211	0.1618	46.89	0.324	0.387
evm.model.scaffold_35.634	0.3912	0.1871	0.4607	0.239	47.79	0.326	0.405
evm.model.scaffold_35.210	0.4337	0.2169	0.4247	0.2308	51.74	0.33	0.395
evm.model.scaffold_35.759	0.4459	0.1824	0.3828	0.2583	49.2	0.335	0.392
evm.model.scaffold_35.24	0.3905	0.256	0.3012	0.1954	53.48	0.388	0.474
evm.model.scaffold_35.801	0.3187	0.3538	0.1733	0.3506	54.65	0.575	0.494
evm.model.scaffold_35.783	0.293	0.2977	0.3673	0.2584	49.85	0.449	0.434
evm.model.scaffold_35.1034	0.4977	0.2581	0.3333	0.2604	45.75	0.37	0.38
evm.model.scaffold_35.140	0.4611	0.2167	0.3291	0.2653	53.8	0.366	0.423
evm.model.scaffold_35.558	0.3497	0.2761	0.3741	0.2463	52.98	0.411	0.454
evm.model.scaffold_35.72	0.4566	0.1908	0.3668	0.2547	51.49	0.338	0.423
evm.model.scaffold_35.676	0.1429	0.5714	0.2222	0.2745	55.92	0.707	0.566
evm.model.scaffold_35.1141	0.4634	0.1707	0.3101	0.2701	44.7	0.342	0.421
evm.model.scaffold_35.961	0.3558	0.3558	0.2969	0.2083	53.66	0.462	0.471
evm.model.scaffold_35.339	0.4108	0.2277	0.2929	0.2869	56.27	0.41	0.468
evm.model.scaffold_35.762	0.3631	0.3095	0.2662	0.4021	54.75	0.515	0.456
evm.model.scaffold_35.1165	0.4127	0.2575	0.2884	0.247	53.9	0.403	0.455
evm.model.scaffold_35.530	0.3964	0.2928	0.3291	0.1704	53.14	0.384	0.421
evm.model.scaffold_35.359	0.4194	0.2903	0.4189	0.169	51.78	0.358	0.441
evm.model.scaffold_35.29	0.4444	0.3403	0.224	0.1491	52.14	0.418	0.471
evm.model.scaffold_35.322	0.403	0.2149	0.43	0.2517	50.5	0.353	0.417
evm.model.scaffold_35.527	0.4177	0.3101	0.3008	0.264	53.35	0.436	0.423
evm.model.scaffold_35.230	0.4984	0.1719	0.3294	0.2504	51.9	0.327	0.427
evm.model.scaffold_35.508	0.4605	0.1993	0.3077	0.1772	54.76	0.318	0.451
evm.model.scaffold_35.1045	0.3315	0.3149	0.2304	0.4167	50.92	0.563	0.48
evm.model.scaffold_35.1066	0.2047	0.4494	0.197	0.3924	51.7	0.67	0.559
evm.model.scaffold_35.139	0.4397	0.1915	0.4206	0.2566	49.38	0.327	0.392
evm.model.scaffold_35.492	0.3731	0.3284	0.2941	0.359	36.22	0.5	0.434
evm.model.scaffold_35.814	0.3984	0.3066	0.3126	0.2696	57.67	0.439	0.44
evm.model.scaffold_35.453	0.3839	0.3601	0.2338	0.2833	53.88	0.501	0.494
evm.model.scaffold_35.409	0.4379	0.2012	0.3052	0.2867	41.26	0.383	0.448
evm.model.scaffold_35.2	0.4858	0.1987	0.3355	0.2733	51.1	0.357	0.429
evm.model.scaffold_35.825	0.4796	0.1674	0.3943	0.3189	48.2	0.36	0.408
evm.model.scaffold_35.482	0.3953	0.2279	0.4187	0.2265	50.22	0.346	0.413
evm.model.scaffold_35.291	0.4118	0.2222	0.3615	0.2957	52.83	0.382	0.409
evm.model.scaffold_35.395	0.1141	0.7228	0.1103	0.2016	35	0.814	0.609
evm.model.scaffold_35.925	0.4916	0.1834	0.3124	0.3077	51.15	0.368	0.435
evm.model.scaffold_35.964	0.3404	0.3712	0.2954	0.2	52.76	0.471	0.475
evm.model.scaffold_35.896	0.3793	0.3218	0.2561	0.2727	59.34	0.476	0.481
evm.model.scaffold_35.81	0.4695	0.1481	0.4138	0.2546	48.83	0.304	0.394
evm.model.scaffold_35.740.1	0.5	0.2244	0.2922	0.2563	55.53	0.361	0.437
evm.model.scaffold_35.794	0.5022	0.1938	0.3413	0.2704	52.02	0.344	0.412
evm.model.scaffold_35.1128	0.4314	0.2255	0.3109	0.2737	51.36	0.391	0.467
evm.model.scaffold_35.161	0.4615	0.1731	0.3505	0.2727	51.89	0.339	0.408
evm.model.scaffold_35.572	0.4046	0.2697	0.3056	0.2278	56.66	0.404	0.48
evm.model.scaffold_35.1187	0.2727	0.3909	0.2692	0.24	59.98	0.536	0.583
evm.model.scaffold_35.341	0.4626	0.1659	0.3766	0.2799	53.53	0.335	0.422
evm.model.scaffold_35.610	0.2816	0.2233	0.33	0.4043	57.64	0.496	0.456
evm.model.scaffold_35.114	0.4134	0.2158	0.3698	0.1866	55.24	0.325	0.414
evm.model.scaffold_35.496_evm.model.scaffold_35.497	0.4809	0.2251	0.3374	0.268	52.03	0.364	0.417
evm.model.scaffold_35.317	0.4574	0.186	0.3529	0.2299	49.28	0.335	0.445
evm.model.scaffold_35.968	0.2258	0.457	0.098	0.404	48.58	0.719	0.644
evm.model.scaffold_35.666	0.306	0.3659	0.2234	0.3668	54.41	0.57	0.51
evm.model.scaffold_35.722	0.219	0.3719	0.3562	0.2332	52.38	0.511	0.545
evm.model.scaffold_35.513	0.3363	0.2212	0.4453	0.265	53.69	0.371	0.421
evm.model.scaffold_35.778	0.3228	0.3133	0.2961	0.3663	52.09	0.509	0.449
evm.model.scaffold_35.394	0.4279	0.2106	0.3946	0.2121	53.14	0.335	0.446
evm.model.scaffold_35.651	0.3578	0.2998	0.2983	0.2895	57.17	0.467	0.476
evm.model.scaffold_35.533	0.4125	0.2302	0.3333	0.2703	49.53	0.389	0.432
evm.model.scaffold_35.278.1	0.5012	0.1439	0.3645	0.2449	48.06	0.303	0.444
evm.model.scaffold_35.1188	0.3448	0.2328	0.375	0.2917	54.86	0.41	0.453
evm.model.scaffold_35.59	0.4541	0.1812	0.3813	0.2341	48.45	0.325	0.416
evm.model.scaffold_35.370	0.4088	0.2783	0.2979	0.2928	53.37	0.436	0.453
evm.model.scaffold_35.258	0.4601	0.2113	0.3422	0.2023	52.5	0.331	0.432
evm.model.scaffold_35.944	0.3693	0.283	0.3779	0.2412	51.58	0.403	0.415
evm.model.scaffold_35.797	0.4784	0.1643	0.3689	0.2764	48.23	0.332	0.412
evm.model.scaffold_35.60	0.3757	0.3006	0.2933	0.2741	54.78	0.449	0.455
evm.model.scaffold_35.959	0.2035	0.4246	0.1697	0.4389	52.3	0.688	0.54
evm.model.scaffold_35.206	0.3133	0.2651	0.4881	0.1899	49.13	0.356	0.409
evm.model.scaffold_35.264	0.4112	0.242	0.3566	0.2735	51.66	0.388	0.413
evm.model.scaffold_35.702	0.244	0.374	0.25	0.4016	54.47	0.606	0.529
evm.model.scaffold_35.546	0.3429	0.3071	0.306	0.2846	51.72	0.467	0.477
evm.model.scaffold_35.272	0.4069	0.2379	0.375	0.2422	50.23	0.373	0.423
evm.model.scaffold_35.511	0.4057	0.3025	0.2996	0.2098	49.77	0.416	0.443
evm.model.scaffold_35.360	0.3286	0.3357	0.3409	0.2677	49.42	0.471	0.496
evm.model.scaffold_35.804	0.4505	0.1978	0.3682	0.2803	53.45	0.364	0.432
evm.model.scaffold_35.571	0.2656	0.3594	0.2301	0.4537	53.95	0.613	0.552
evm.model.scaffold_35.334	0.4668	0.1966	0.3398	0.241	50.8	0.339	0.408
evm.model.scaffold_35.700	0.3435	0.3282	0.3982	0.3119	50.6	0.461	0.445
evm.model.scaffold_35.459	0.3559	0.322	0.2569	0.32	55.02	0.5	0.486
evm.model.scaffold_35.577	0.3128	0.3231	0.3333	0.2762	56.01	0.477	0.462
evm.model.scaffold_35.350	0.4649	0.2334	0.2863	0.3086	45.76	0.401	0.414
evm.model.scaffold_35.194	0.3652	0.1913	0.3714	0.2959	60.41	0.386	0.48
evm.model.scaffold_35.554	0.4302	0.2674	0.2361	0.3594	59.76	0.46	0.413
evm.model.scaffold_35.750	0.3648	0.2605	0.3821	0.2088	50.04	0.378	0.435
evm.model.scaffold_35.552	0.4436	0.1946	0.4177	0.2611	50.87	0.333	0.394
evm.model.scaffold_35.233	0.4321	0.2531	0.3951	0.2752	53.22	0.38	0.412
evm.model.scaffold_35.352	0.385	0.28	0.3333	0.2789	49.48	0.425	0.442
evm.model.scaffold_35.886	0.3991	0.3433	0.2865	0.1751	47.28	0.429	0.47
evm.model.scaffold_35.363	0.3623	0.3575	0.2486	0.2549	60.73	0.489	0.451
evm.model.scaffold_35.1121	0.4	0.26	0.356	0.233	54.98	0.386	0.424
evm.model.scaffold_35.687	0.362	0.274	0.3389	0.2588	52.9	0.42	0.441
evm.model.scaffold_35.880	0.53	0.18	0.28	0.3333	41.76	0.357	0.4
evm.model.scaffold_35.635	0.5227	0.1818	0.3944	0.1912	30.7	0.282	0.462
evm.model.scaffold_35.17	0.3527	0.2857	0.3191	0.2883	57.73	0.454	0.472
evm.model.scaffold_35.698	0.4365	0.2541	0.3333	0.2105	54.97	0.368	0.455
evm.model.scaffold_35.742	0.4241	0.2135	0.3401	0.2707	51.8	0.374	0.426
evm.model.scaffold_35.300	0.3941	0.2288	0.3945	0.2451	55.32	0.367	0.418
evm.model.scaffold_35.815.1	0.4412	0.2112	0.3646	0.2455	52.97	0.352	0.426
evm.model.scaffold_35.257	0.4095	0.181	0.2136	0.3505	45.29	0.449	0.497
evm.model.scaffold_35.222	0.4659	0.1477	0.375	0.2874	46.19	0.33	0.389
evm.model.scaffold_35.1033	0.2465	0.3993	0.2567	0.3123	52.38	0.584	0.575
evm.model.scaffold_35.90	0.2764	0.4526	0.175	0.2742	53.37	0.612	0.556
evm.model.scaffold_35.175	0.5165	0.1802	0.3754	0.3081	48.21	0.352	0.408
evm.model.scaffold_35.22	0.2416	0.4157	0.2195	0.4052	53.13	0.633	0.526
evm.model.scaffold_35.259	0.4684	0.2359	0.2703	0.3306	48.06	0.415	0.414
evm.model.scaffold_35.1055	0.4167	0.2963	0.2245	0.3034	48.6	0.468	0.471
evm.model.scaffold_35.1178	0.4175	0.2972	0.3233	0.2006	53.92	0.399	0.444
evm.model.scaffold_35.895	0.3738	0.3084	0.2632	0.2809	48.31	0.472	0.46
evm.model.scaffold_35.604	0.4351	0.2086	0.3424	0.3029	49.23	0.387	0.427
evm.model.scaffold_35.998	0.4933	0.1867	0.3814	0.2527	47.38	0.333	0.439
evm.model.scaffold_35.37	0.3094	0.337	0.2562	0.394	52.81	0.549	0.453
evm.model.scaffold_35.340.3	0.4689	0.1798	0.3865	0.2342	50.27	0.315	0.432
evm.model.scaffold_35.271	0.4207	0.2414	0.3045	0.296	52.43	0.415	0.446
evm.model.scaffold_35.164	0.4135	0.188	0.3725	0.2819	47.62	0.374	0.438
evm.model.scaffold_35.1052_evm.model.scaffold_35.1053	0.4328	0.2364	0.34	0.2492	55.09	0.376	0.432
evm.model.scaffold_35.58	0.4455	0.1943	0.3866	0.194	49.52	0.311	0.438
evm.model.scaffold_35.332	0.4987	0.179	0.2857	0.2657	48.38	0.351	0.455
evm.model.scaffold_35.247	0.3792	0.2379	0.3849	0.255	51.75	0.386	0.437
evm.model.scaffold_35.891	0.5053	0.1053	0.2603	0.3692	40.26	0.337	0.387
evm.model.scaffold_35.573	0.38	0.3007	0.2734	0.2853	56.88	0.46	0.46
evm.model.scaffold_35.728	0.4096	0.241	0.2866	0.3548	52.43	0.452	0.45
evm.model.scaffold_35.625	0.4183	0.1713	0.4071	0.2883	53.13	0.34	0.416
evm.model.scaffold_35.537	0.4103	0.2147	0.3565	0.2654	47.58	0.376	0.433
evm.model.scaffold_35.447	0.4036	0.2218	0.39	0.2456	54.24	0.356	0.412
evm.model.scaffold_35.306	0.3902	0.2683	0.4	0.2234	50.17	0.37	0.418
evm.model.scaffold_35.442	0.4218	0.1709	0.3452	0.2605	45.26	0.349	0.438
evm.model.scaffold_35.900	0.3968	0.1984	0.3839	0.2817	46.79	0.372	0.432
evm.model.scaffold_35.879	0.25	0.2803	0.1667	0.4661	52.51	0.634	0.622
evm.model.scaffold_35.1000	0.3073	0.276	0.3016	0.3575	61	0.502	0.497
evm.model.scaffold_35.938	0.2753	0.3671	0.295	0.293	56.23	0.531	0.48
evm.model.scaffold_35.826	0.3627	0.2585	0.3454	0.3139	55.28	0.437	0.434
evm.model.scaffold_35.331	0.4233	0.2434	0.3613	0.2446	58.59	0.379	0.467
evm.model.scaffold_35.126.1	0.4091	0.1818	0.4314	0.2411	48.42	0.325	0.394
evm.model.scaffold_35.658	0.4861	0.1696	0.2831	0.3636	48.77	0.4	0.427
evm.model.scaffold_35.184	0.4816	0.1794	0.3417	0.2725	49.35	0.343	0.426
evm.model.scaffold_35.460	0.248	0.3618	0.2247	0.3907	54.45	0.607	0.564
evm.model.scaffold_35.1018	0.433	0.2242	0.2949	0.3015	52.83	0.404	0.45
evm.model.scaffold_35.628	0.4905	0.1948	0.3046	0.2998	51.95	0.369	0.426
evm.model.scaffold_35.1134	0.3737	0.2727	0.3776	0.2527	51.89	0.403	0.474
evm.model.scaffold_35.170	0.3909	0.2364	0.4242	0.1895	58.45	0.341	0.437
evm.model.scaffold_35.456	0.478	0.2375	0.2878	0.2829	44.31	0.387	0.417
evm.model.scaffold_35.196	0.2542	0.3559	0.2054	0.4181	54.35	0.623	0.547
evm.model.scaffold_35.789.1	0.3988	0.1667	0.4074	0.2568	53.77	0.332	0.422
evm.model.scaffold_35.830	0.3292	0.3542	0.2037	0.3083	59.12	0.539	0.508
evm.model.scaffold_35.43	0.3007	0.3856	0.2845	0.271	55.32	0.527	0.479
evm.model.scaffold_35.650	0.4937	0.1946	0.2616	0.2709	47.79	0.371	0.467
evm.model.scaffold_35.735	0.4265	0.2868	0.2353	0.211	49.23	0.419	0.455
evm.model.scaffold_35.983	0.4488	0.2293	0.3348	0.2995	49.83	0.396	0.429
evm.model.scaffold_35.412	0.3479	0.326	0.2695	0.2194	55.17	0.466	0.501
evm.model.scaffold_35.726	0.4766	0.2125	0.3339	0.2248	52.7	0.339	0.437
evm.model.scaffold_35.387	0.4211	0.193	0.4352	0.23	56.11	0.321	0.389
evm.model.scaffold_35.576	0.4444	0.2741	0.3333	0.2101	51.97	0.378	0.442
evm.model.scaffold_35.1083	0.3514	0.455	0.1422	0.25	48.39	0.582	0.567
evm.model.scaffold_35.454	0.4422	0.2538	0.2698	0.2429	51.99	0.401	0.449
evm.model.scaffold_35.32	0.3813	0.2451	0.3622	0.2629	49.88	0.395	0.441
evm.model.scaffold_35.106	0.4373	0.1613	0.4068	0.1773	48.29	0.282	0.47
evm.model.scaffold_35.56.2	0.404	0.2436	0.4097	0.2052	50.86	0.351	0.432
evm.model.scaffold_35.494	0.3778	0.237	0.3899	0.3586	44.37	0.426	0.41
evm.model.scaffold_35.484	0.3323	0.3535	0.2648	0.2654	56.66	0.505	0.536
evm.model.scaffold_35.868	0.4787	0.1809	0.3093	0.2442	43.43	0.336	0.462
evm.model.scaffold_35.1117	0.4456	0.1347	0.3439	0.2938	50	0.341	0.431
evm.model.scaffold_35.704	0.3559	0.2342	0.3235	0.2623	57.92	0.408	0.44
evm.model.scaffold_35.1039	0.4358	0.2016	0.351	0.2734	53.22	0.363	0.436
evm.model.scaffold_35.773	0.4537	0.1713	0.3877	0.2823	47.86	0.34	0.379
evm.model.scaffold_35.48	0.4179	0.1812	0.3894	0.2702	51.49	0.342	0.412
evm.model.scaffold_35.65	0.3976	0.2003	0.3855	0.2625	46.88	0.364	0.442
evm.model.scaffold_35.221	0.4681	0.2632	0.309	0.2896	50.21	0.409	0.424
evm.model.scaffold_35.669	0.3728	0.2288	0.3557	0.2885	54.53	0.404	0.45
evm.model.scaffold_35.863	0.4085	0.2195	0.3659	0.3092	56.76	0.395	0.412
evm.model.scaffold_35.989	0.4545	0.2584	0.3464	0.2048	54.99	0.359	0.425
evm.model.scaffold_35.154	0.4156	0.2437	0.3459	0.2286	56.05	0.373	0.425
evm.model.scaffold_35.915	0.2442	0.3605	0.1646	0.4211	55.74	0.649	0.641
evm.model.scaffold_35.156	0.4381	0.2794	0.2379	0.3092	49.43	0.45	0.453
evm.model.scaffold_35.930	0.2908	0.366	0.3023	0.2735	53.87	0.513	0.476
evm.model.scaffold_35.441	0.4101	0.2528	0.2949	0.3009	56.32	0.433	0.467
evm.model.scaffold_35.410	0.4509	0.1965	0.2975	0.3061	44.98	0.387	0.45
evm.model.scaffold_35.1123	0.4615	0.2436	0.2295	0.35	40.29	0.444	0.438
evm.model.scaffold_35.169	0.3427	0.3343	0.1729	0.3839	54.8	0.566	0.5
evm.model.scaffold_35.28	0.4353	0.1918	0.397	0.2393	49.02	0.333	0.425
evm.model.scaffold_35.1013	0.388	0.3205	0.3107	0.2786	56.88	0.454	0.443
evm.model.scaffold_35.822	0.177	0.1062	0.1214	0.777	33.63	0.764	0.635
evm.model.scaffold_35.526	0.3964	0.2523	0.3118	0.2353	55.97	0.397	0.415
evm.model.scaffold_35.336_evm.model.scaffold_35.337	0.36	0.3158	0.2681	0.2357	54.2	0.461	0.514
evm.model.scaffold_35.1115	0.495	0.1762	0.3351	0.2055	48.95	0.306	0.433
evm.model.scaffold_35.201	0.3549	0.2618	0.29	0.3216	57.4	0.458	0.47
evm.model.scaffold_35.824	0.486	0.1871	0.2203	0.3327	48.02	0.413	0.536
evm.model.scaffold_35.406	0.4379	0.2249	0.3061	0.2647	47.41	0.383	0.449
evm.model.scaffold_35.1047	0.344	0.28	0.2832	0.2685	58.85	0.46	0.476
evm.model.scaffold_35.33	0.4048	0.2917	0.3248	0.2828	58.69	0.431	0.442
evm.model.scaffold_35.856	0.3763	0.2581	0.4012	0.2349	50.34	0.374	0.411
evm.model.scaffold_35.218_evm.model.scaffold_35.219	0.4811	0.1874	0.3342	0.2399	50.17	0.336	0.459
evm.model.scaffold_35.531	0.4229	0.163	0.21	0.4624	47.05	0.471	0.472
evm.model.scaffold_35.845	0.4342	0.1842	0.4237	0.2788	45.78	0.345	0.414
evm.model.scaffold_35.665	0.3478	0.2319	0.4648	0.3182	47.89	0.394	0.413
evm.model.scaffold_35.1011	0.2571	0.5071	0.1557	0.2167	45.03	0.638	0.58
evm.model.scaffold_35.83	0.3386	0.252	0.3643	0.3226	49.52	0.444	0.43
evm.model.scaffold_35.501	0.4356	0.2277	0.3636	0.2397	51.65	0.36	0.406
evm.model.scaffold_35.644	0.3974	0.2559	0.2657	0.314	55.71	0.454	0.474
evm.model.scaffold_35.216	0.115	0.6195	0.1359	0.4	34.77	0.8	0.579
evm.model.scaffold_35.316	0.2825	0.3672	0.1798	0.4209	50.16	0.624	0.539
evm.model.scaffold_35.57	0.4094	0.2125	0.4023	0.2389	52.07	0.348	0.442
evm.model.scaffold_35.485	0.3762	0.2871	0.3373	0.2208	53.84	0.411	0.479
evm.model.scaffold_35.570.1	0.5	0.213	0.2764	0.2167	46.39	0.341	0.432
evm.model.scaffold_35.303	0.3333	0.3667	0.3976	0.1948	48.05	0.432	0.42
evm.model.scaffold_35.399	0.4221	0.1926	0.3632	0.3032	55.96	0.377	0.426
evm.model.scaffold_35.903	0.4262	0.1983	0.3853	0.2465	47.54	0.345	0.444
evm.model.scaffold_35.579	0.3943	0.323	0.2746	0.2353	55.06	0.448	0.453
evm.model.scaffold_35.725	0.3853	0.2477	0.37	0.241	61	0.373	0.398
evm.model.scaffold_35.1142	0.4752	0.1838	0.3484	0.2838	50.1	0.348	0.418
evm.model.scaffold_35.591	0.4339	0.1852	0.3636	0.2989	57.93	0.367	0.443
evm.model.scaffold_35.70	0.3819	0.2361	0.3443	0.2863	49.2	0.405	0.424
evm.model.scaffold_35.970	0.4885	0.2154	0.311	0.2387	53.54	0.356	0.474
evm.model.scaffold_35.323	0.4804	0.2033	0.3397	0.2507	50.07	0.346	0.426
evm.model.scaffold_35.681	0.4706	0.2098	0.3415	0.1995	49.03	0.324	0.437
evm.model.scaffold_35.487	0.5185	0.1037	0.4141	0.2269	47.78	0.25	0.389
evm.model.scaffold_35.124	0.436	0.2271	0.3767	0.2321	50.25	0.349	0.4
evm.model.scaffold_35.46	0.3023	0.3101	0.3095	0.3525	53.09	0.516	0.509
evm.model.scaffold_35.127	0.3551	0.2383	0.3281	0.3571	55.29	0.455	0.479
evm.model.scaffold_35.1003	0.396	0.2772	0.2842	0.2826	52.74	0.446	0.434
evm.model.scaffold_35.504	0.2756	0.2415	0.216	0.5265	52.76	0.599	0.531
evm.model.scaffold_35.901	0.2935	0.3315	0.4129	0.1513	45.6	0.416	0.533
evm.model.scaffold_35.790	0.3776	0.3986	0.1439	0.3305	50.75	0.568	0.487
evm.model.scaffold_35.325	0.3888	0.2224	0.3657	0.2862	54.1	0.397	0.457
evm.model.scaffold_35.35.2	0.4258	0.2323	0.3185	0.2083	48.68	0.359	0.447
evm.model.scaffold_35.438	0.3583	0.2406	0.352	0.2814	52.86	0.414	0.482
evm.model.scaffold_35.589	0.5193	0.1529	0.3632	0.2376	47.47	0.299	0.416
evm.model.scaffold_35.160	0.4085	0.1972	0.4179	0.322	60.07	0.367	0.404
evm.model.scaffold_35.327	0.3819	0.3194	0.2901	0.2583	53.43	0.453	0.473
evm.model.scaffold_35.1125	0.4754	0.2377	0.2381	0.2727	51.97	0.403	0.474
evm.model.scaffold_35.280	0.439	0.2033	0.3471	0.2432	52.96	0.351	0.443
evm.model.scaffold_35.829	0.4218	0.2436	0.3607	0.2227	54.65	0.366	0.445
evm.model.scaffold_35.117	0.4583	0.2292	0.3212	0.252	49.18	0.371	0.393
evm.model.scaffold_35.104	0.4503	0.2019	0.3415	0.1758	48.84	0.312	0.432
evm.model.scaffold_35.455	0.3564	0.2871	0.3	0.3204	61	0.473	0.488
evm.model.scaffold_35.182	0.4458	0.2198	0.3107	0.3275	51.37	0.406	0.43
evm.model.scaffold_35.467	0.2321	0.5154	0.1401	0.4	47.23	0.702	0.514
evm.model.scaffold_35.276	0.4253	0.3218	0.3562	0.1765	53.52	0.388	0.458
evm.model.scaffold_35.232	0.4041	0.2329	0.31	0.3279	47.08	0.423	0.434
evm.model.scaffold_35.1190	0.4065	0.2944	0.3556	0.2857	55.5	0.424	0.424
evm.model.scaffold_35.64	0.4268	0.3293	0.2432	0.3077	55.52	0.47	0.448
evm.model.scaffold_35.869	0.4347	0.2339	0.3297	0.2271	56.72	0.37	0.47
evm.model.scaffold_35.418	0.4353	0.2768	0.3464	0.2301	52.37	0.385	0.425
evm.model.scaffold_35.739	0.3306	0.281	0.3833	0.2752	49.51	0.427	0.444
evm.model.scaffold_35.678	0.3571	0.2946	0.3163	0.2717	52.16	0.45	0.433
evm.model.scaffold_35.1186	0.4191	0.2904	0.3439	0.2265	49.63	0.397	0.42
evm.model.scaffold_35.706	0.4013	0.2357	0.4156	0.209	46.92	0.339	0.408
evm.model.scaffold_35.159	0.3115	0.2787	0.4068	0.2222	52.58	0.403	0.448
evm.model.scaffold_35.538	0.3641	0.3193	0.3077	0.2317	57.57	0.448	0.487
evm.model.scaffold_35.649	0.4613	0.1719	0.3471	0.2902	43.54	0.359	0.411
evm.model.scaffold_35.807	0.4309	0.1499	0.3739	0.3232	46.9	0.379	0.445
evm.model.scaffold_35.153	0.3882	0.2147	0.3363	0.323	51.41	0.417	0.465
evm.model.scaffold_35.693	0.4414	0.2057	0.3557	0.2685	52.15	0.362	0.437
evm.model.scaffold_35.294	0.4455	0.1946	0.2679	0.3508	50.38	0.42	0.464
evm.model.scaffold_35.877	0.3452	0.3858	0.2273	0.2012	56.14	0.505	0.518
evm.model.scaffold_35.374	0.4455	0.1708	0.3018	0.3288	52.73	0.388	0.436
evm.model.scaffold_35.193	0.3466	0.2619	0.3422	0.3258	52.97	0.451	0.461
evm.model.scaffold_35.1043	0.4158	0.2394	0.4242	0.206	52.36	0.341	0.416
evm.model.scaffold_35.431	0.4575	0.2026	0.3904	0.2518	58.03	0.342	0.427
evm.model.scaffold_35.763	0.3797	0.2857	0.3235	0.2952	54.86	0.437	0.434
evm.model.scaffold_35.275	0.4682	0.1768	0.3522	0.231	50.75	0.319	0.422
evm.model.scaffold_35.167	0.4153	0.209	0.4294	0.2284	46.61	0.331	0.397
evm.model.scaffold_35.345	0.3657	0.2164	0.3008	0.3571	56.27	0.454	0.476
evm.model.scaffold_35.1097	0.4472	0.1955	0.2681	0.3343	52.47	0.406	0.449
evm.model.scaffold_35.229	0.4854	0.2	0.363	0.2384	51.56	0.332	0.424
evm.model.scaffold_35.738	0.4325	0.2111	0.3538	0.272	52.15	0.372	0.434
evm.model.scaffold_35.512	0.4163	0.1483	0.3871	0.303	50.99	0.347	0.426
evm.model.scaffold_35.1004	0.4524	0.2113	0.2805	0.2938	55.19	0.404	0.484
evm.model.scaffold_35.313	0.458	0.1783	0.2727	0.2784	46.94	0.375	0.501
evm.model.scaffold_35.962	0.3687	0.3301	0.2955	0.2326	58.33	0.454	0.473
evm.model.scaffold_35.211	0.3803	0.2864	0.373	0.2071	52.18	0.39	0.454
evm.model.scaffold_35.256	0.3724	0.2897	0.2955	0.2222	47.54	0.429	0.442
evm.model.scaffold_35.587	0.3054	0.335	0.1919	0.3333	49.61	0.569	0.586
evm.model.scaffold_35.377	0.3894	0.296	0.352	0.2467	57.89	0.415	0.446
evm.model.scaffold_35.1170	0.3103	0.4253	0.1489	0.4598	60	0.653	0.527
evm.model.scaffold_35.146	0.4337	0.2289	0.3457	0.2778	41	0.379	0.433
evm.model.scaffold_35.940	0.3642	0.1975	0.3709	0.2986	57.98	0.395	0.459
evm.model.scaffold_35.452.1	0.2329	0.4167	0.1429	0.468	48.49	0.691	0.547
evm.model.scaffold_35.203	0.4508	0.2614	0.3229	0.2319	52.57	0.38	0.417
evm.model.scaffold_35.727	0.4255	0.2819	0.2603	0.2473	54.83	0.425	0.459
evm.model.scaffold_35.333.1	0.4231	0.1982	0.2987	0.2888	49.41	0.385	0.438
evm.model.scaffold_35.990	0.4707	0.1824	0.396	0.2274	51.43	0.316	0.417
evm.model.scaffold_35.736	0.4359	0.2436	0.403	0.2623	54.46	0.365	0.396
evm.model.scaffold_35.1010	0.4601	0.1812	0.4082	0.2149	51.37	0.304	0.415
evm.model.scaffold_35.555	0.4427	0.1771	0.3829	0.3484	48.26	0.367	0.367
evm.model.scaffold_35.655	0.3916	0.241	0.3933	0.2278	52.4	0.367	0.428
evm.model.scaffold_35.724	0.4588	0.1412	0.4474	0.1884	42.33	0.255	0.414
evm.model.scaffold_35.208	0.2835	0.3573	0.1701	0.4366	54.63	0.63	0.549
evm.model.scaffold_35.474	0.4351	0.223	0.4331	0.2243	49.52	0.335	0.408
evm.model.scaffold_35.274	0.3659	0.3476	0.3014	0.2374	44.09	0.464	0.465
evm.model.scaffold_35.1158	0.4676	0.1716	0.3484	0.2752	49.72	0.336	0.389
evm.model.scaffold_35.828	0.4229	0.2457	0.419	0.2455	51.8	0.361	0.394
evm.model.scaffold_35.748	0.3926	0.237	0.3419	0.2667	52.86	0.392	0.398
evm.model.scaffold_35.199	0.3689	0.2295	0.2677	0.4202	49.72	0.497	0.48
evm.model.scaffold_35.246	0.3636	0.2818	0.381	0.2121	52.71	0.394	0.46
evm.model.scaffold_35.1159	0.4396	0.2464	0.3559	0.264	51.48	0.379	0.429
evm.model.scaffold_35.708	0.3556	0.2963	0.3361	0.2202	51.26	0.418	0.431
evm.model.scaffold_35.799	0.4052	0.2416	0.3777	0.2269	48.02	0.367	0.428
evm.model.scaffold_35.798	0.3684	0.3684	0.2075	0.433	59.2	0.568	0.452
evm.model.scaffold_35.569	0.273	0.4043	0.2048	0.3106	56.66	0.594	0.554
evm.model.scaffold_35.632	0.3602	0.2817	0.3173	0.3318	56.87	0.464	0.45
evm.model.scaffold_35.672	0.4755	0.1818	0.3568	0.2153	50.25	0.304	0.374
evm.model.scaffold_35.207	0.3043	0.5217	0.1364	0.193	42.2	0.619	0.614
evm.model.scaffold_35.405	0.4047	0.3023	0.2216	0.3389	57.71	0.492	0.461
evm.model.scaffold_35.1157	0.2615	0.4	0.2132	0.3789	56.69	0.617	0.548
evm.model.scaffold_35.214	0.3841	0.2576	0.3002	0.3169	52.88	0.45	0.48
evm.model.scaffold_35.951	0.2764	0.4068	0.2657	0.2963	53.41	0.561	0.507
evm.model.scaffold_35.109	0.2063	0.5397	0.0893	0.3208	43.07	0.739	0.648
evm.model.scaffold_35.324	0.3671	0.249	0.3338	0.2631	52.77	0.415	0.485
evm.model.scaffold_35.149	0.3148	0.2778	0.3435	0.3195	58.44	0.463	0.47
evm.model.scaffold_35.912	0.1646	0.4177	0.1688	0.381	52.41	0.701	0.604
evm.model.scaffold_35.125	0.5172	0.2184	0.2745	0.4059	45.34	0.451	0.448
evm.model.scaffold_35.791	0.3333	0.3793	0.1765	0.4125	46.67	0.6	0.507
evm.model.scaffold_35.204	0.263	0.3926	0.2311	0.3194	51.7	0.587	0.573
evm.model.scaffold_35.1088	0.436	0.2209	0.371	0.2985	54.82	0.381	0.412
evm.model.scaffold_35.31	0.4352	0.2778	0.236	0.2805	52.92	0.438	0.454
evm.model.scaffold_35.491	0.4183	0.2614	0.2628	0.3862	47.11	0.478	0.447
evm.model.scaffold_35.228	0.423	0.1813	0.3558	0.3267	55.98	0.382	0.432
evm.model.scaffold_35.627	0.4089	0.2345	0.3586	0.2444	51.36	0.37	0.406
evm.model.scaffold_35.565	0.3824	0.2206	0.4595	0.2268	48.09	0.335	0.413
evm.model.scaffold_35.1167	0.3163	0.3642	0.1948	0.3495	54.7	0.575	0.521
evm.model.scaffold_35.640	0.4005	0.2302	0.357	0.2355	50.1	0.37	0.446
evm.model.scaffold_35.425	0.3846	0.2937	0.3133	0.2695	59.73	0.44	0.456
evm.model.scaffold_35.326	0.4173	0.2441	0.3433	0.2295	53.22	0.373	0.429
evm.model.scaffold_35.91	0.3133	0.3546	0.2098	0.3346	54.66	0.559	0.52
evm.model.scaffold_35.1071	0.4022	0.3913	0.1928	0.3014	52.04	0.523	0.465
evm.model.scaffold_35.282	0.4357	0.1571	0.3958	0.2672	49.36	0.326	0.416
evm.model.scaffold_35.1035	0.4876	0.2066	0.3019	0.3158	45.32	0.377	0.393
evm.model.scaffold_35.174	0.4037	0.2592	0.3399	0.1988	55.57	0.376	0.44
evm.model.scaffold_35.813	0.4322	0.2331	0.3802	0.2184	49.61	0.347	0.396
evm.model.scaffold_35.519	0.4085	0.1831	0.3974	0.3237	56.1	0.376	0.423
evm.model.scaffold_35.543	0.313	0.3912	0.2207	0.3304	54.36	0.566	0.498
evm.model.scaffold_35.741	0.3444	0.4056	0.237	0.2778	49.62	0.534	0.47
evm.model.scaffold_35.746	0.3754	0.2667	0.3478	0.2197	56.17	0.391	0.446
evm.model.scaffold_35.563	0.5283	0.1226	0.2872	0.3735	48.32	0.346	0.412
evm.model.scaffold_35.212	0.1515	0.4242	0.1653	0.4068	55.14	0.722	0.635
evm.model.scaffold_35.179	0.3254	0.355	0.3775	0.1633	48.39	0.429	0.451
evm.model.scaffold_35.356	0.4627	0.2017	0.3475	0.2349	52.02	0.339	0.433
evm.model.scaffold_35.1162	0.2269	0.3445	0.4828	0.2315	59.93	0.443	0.437
evm.model.scaffold_35.680	0.4401	0.1904	0.4556	0.235	45.77	0.313	0.399
evm.model.scaffold_35.584	0.3348	0.3291	0.3098	0.3097	58.73	0.487	0.454
evm.model.scaffold_35.966	0.4109	0.2069	0.3918	0.2776	51.29	0.372	0.443
evm.model.scaffold_35.516	0.4118	0.2471	0.2949	0.28	48.73	0.42	0.454
evm.model.scaffold_35.424	0.5352	0.1972	0.3306	0.2613	50.83	0.329	0.42
evm.model.scaffold_35.75.1	0.4658	0.2857	0.2899	0.1838	41.68	0.382	0.551
evm.model.scaffold_35.435	0.4931	0.1651	0.3812	0.2519	48.12	0.315	0.423
evm.model.scaffold_35.439	0.4344	0.2163	0.3745	0.2296	46.47	0.347	0.434
evm.model.scaffold_35.241	0.4759	0.2138	0.3025	0.1927	47.13	0.331	0.422
evm.model.scaffold_35.457	0.4615	0.2212	0.2371	0.3034	48.52	0.413	0.415
evm.model.scaffold_35.426	0.4469	0.2682	0.2865	0.2444	50.16	0.409	0.449
evm.model.scaffold_35.238	0.4447	0.1821	0.3655	0.2685	51.42	0.346	0.427
evm.model.scaffold_35.596	0.3294	0.3647	0.1899	0.4459	61	0.598	0.517
evm.model.scaffold_35.483	0.3542	0.2847	0.4065	0.2245	46.41	0.394	0.408
evm.model.scaffold_35.514	0.3529	0.3725	0.2706	0.1728	61	0.468	0.555
evm.model.scaffold_35.200	0.443	0.1741	0.3633	0.2657	49.15	0.345	0.445
evm.model.scaffold_35.173	0.3943	0.2629	0.4069	0.1923	53.4	0.357	0.394
evm.model.scaffold_35.551	0.3858	0.2913	0.3534	0.2162	61	0.404	0.437
evm.model.scaffold_35.810	0.3615	0.2554	0.3803	0.2665	50.34	0.404	0.437
evm.model.scaffold_35.14	0.3323	0.3866	0.1581	0.3686	53.75	0.597	0.566
evm.model.scaffold_35.505	0.4056	0.1633	0.3705	0.3285	51.72	0.383	0.417
evm.model.scaffold_35.685_evm.model.scaffold_35.686	0.3611	0.2738	0.3341	0.2566	53.4	0.422	0.443
evm.model.scaffold_35.357	0.3103	0.2897	0.3764	0.3108	51.81	0.458	0.449
evm.model.scaffold_35.45	0.4155	0.2053	0.2876	0.2762	50.74	0.392	0.454
evm.model.scaffold_35.866	0.4087	0.2306	0.3088	0.3105	54.46	0.418	0.453
evm.model.scaffold_35.178	0.4179	0.2077	0.2775	0.3114	54.32	0.416	0.505
evm.model.scaffold_35.223	0.4588	0.1621	0.3936	0.2284	47.24	0.305	0.422
evm.model.scaffold_35.754	0.4815	0.1667	0.3107	0.2632	41.26	0.339	0.454
evm.model.scaffold_35.771	0.3818	0.2182	0.4592	0.2128	50.76	0.336	0.436
evm.model.scaffold_35.532	0.2323	0.4242	0.2824	0.1882	52.68	0.552	0.557
evm.model.scaffold_35.1017	0.2335	0.4543	0.1804	0.4116	48.19	0.669	0.54
evm.model.scaffold_35.375	0.4118	0.2132	0.4058	0.2296	49.45	0.349	0.448
evm.model.scaffold_35.7	0.4748	0.1879	0.3605	0.2408	49.98	0.328	0.418
evm.model.scaffold_35.1140	0.4808	0.1681	0.341	0.2598	51.39	0.337	0.453
evm.model.scaffold_35.1080	0.3168	0.3564	0.2813	0.3107	56.16	0.518	0.493
evm.model.scaffold_35.240	0.4986	0.1873	0.3459	0.1993	49.6	0.303	0.404
evm.model.scaffold_35.1086	0.3475	0.2973	0.4064	0.201	55.88	0.399	0.472
evm.model.scaffold_35.654	0.3677	0.3069	0.2537	0.3429	57.8	0.499	0.498
evm.model.scaffold_35.607	0.1705	0.7159	0.1389	0.2769	36.63	0.764	0.517
evm.model.scaffold_35.77	0.3768	0.2635	0.3388	0.1985	53.34	0.384	0.447
evm.model.scaffold_35.237	0.5	0.1364	0.3645	0.2121	48.24	0.277	0.424
evm.model.scaffold_35.220	0.3793	0.2626	0.3276	0.2591	59.47	0.417	0.477
evm.model.scaffold_35.376	0.4333	0.2196	0.3506	0.2785	52	0.372	0.409
evm.model.scaffold_35.1002	0.4452	0.2458	0.3374	0.2743	55.05	0.385	0.402
evm.model.scaffold_35.1099	0.5129	0.2191	0.3113	0.2433	53.64	0.346	0.442
evm.model.scaffold_35.541	0.3363	0.2566	0.1765	0.5091	56.77	0.59	0.533
evm.model.scaffold_35.1160	0.375	0.2885	0.3056	0.2813	53.18	0.442	0.446
evm.model.scaffold_35.158	0.4113	0.2581	0.3585	0.2079	61	0.373	0.465
evm.model.scaffold_35.603	0.3812	0.1906	0.4315	0.2416	49.4	0.339	0.42
evm.model.scaffold_259.1	0.4328	0.3284	0.4412	0.2231	43.25	0.376	0.345
evm.model.scaffold_259.7	0.3095	0.2024	0.1979	0.5109	58.15	0.587	0.503
evm.model.scaffold_259.4_evm.model.scaffold_259.5	0.4291	0.1626	0.3857	0.25	52.32	0.324	0.423
evm.model.scaffold_259.2	0.2386	0.3834	0.2583	0.37	55.24	0.597	0.528
evm.model.scaffold_408.5	0.4891	0.2101	0.3925	0.2062	49.38	0.317	0.433
evm.model.scaffold_408.4	0.3067	0.4724	0.1706	0.2868	49.22	0.607	0.539
evm.model.scaffold_408.3.1	0.4413	0.1816	0.3913	0.2693	46.44	0.348	0.419
evm.model.scaffold_408.2	0.3869	0.2262	0.3863	0.222	48.49	0.36	0.449
evm.model.scaffold_408.1	0.3552	0.3005	0.2686	0.284	57.91	0.474	0.485
evm.model.scaffold_135.9	0.4348	0.2121	0.3824	0.2591	50.4	0.358	0.419
evm.model.scaffold_135.3	0.3684	0.2412	0.3462	0.3825	51.97	0.465	0.443
evm.model.scaffold_135.1	0.3909	0.2661	0.2237	0.359	55.65	0.492	0.483
evm.model.scaffold_135.5	0.3522	0.3208	0.2199	0.3934	53.54	0.543	0.481
evm.model.scaffold_135.4	0.39	0.2533	0.2705	0.3784	53.22	0.474	0.454
evm.model.scaffold_135.11	0.4833	0.2083	0.3202	0.2368	52.21	0.351	0.449
evm.model.scaffold_135.6	0.4427	0.2346	0.334	0.2206	50.86	0.361	0.459
evm.model.scaffold_135.8	0.4343	0.2271	0.3392	0.2338	52.94	0.359	0.437
evm.model.scaffold_135.7	0.4336	0.2448	0.2774	0.3023	48.13	0.425	0.444
evm.model.scaffold_135.2	0.4063	0.2188	0.2763	0.2055	46.49	0.375	0.627
evm.model.scaffold_99.40	0.4595	0.2516	0.2692	0.273	55.37	0.405	0.462
evm.model.scaffold_99.54	0.4365	0.1827	0.3815	0.3311	44.22	0.359	0.371
evm.model.scaffold_99.58	0.4549	0.2175	0.324	0.2495	53.04	0.371	0.463
evm.model.scaffold_99.23	0.3437	0.3902	0.2054	0.336	52.42	0.559	0.49
evm.model.scaffold_99.21	0.4368	0.2233	0.3358	0.2361	54.94	0.363	0.438
evm.model.scaffold_99.65	0.5	0.2256	0.3106	0.2583	54.34	0.365	0.42
evm.model.scaffold_99.9	0.387	0.313	0.2146	0.2698	45.69	0.48	0.514
evm.model.scaffold_99.44	0.3585	0.317	0.2987	0.285	57.46	0.469	0.454
evm.model.scaffold_99.39	0.1809	0.5021	0.1521	0.4156	48.48	0.726	0.563
evm.model.scaffold_99.64	0.4071	0.2035	0.2804	0.3398	52.36	0.433	0.472
evm.model.scaffold_99.24	0.5125	0.275	0.1538	0.3256	43.56	0.476	0.492
evm.model.scaffold_99.26	0.3689	0.3115	0.26	0.3511	53.56	0.5	0.493
evm.model.scaffold_99.8	0.4251	0.2585	0.3325	0.2686	51.96	0.404	0.437
evm.model.scaffold_99.43	0.459	0.1965	0.3661	0.2446	52.09	0.339	0.426
evm.model.scaffold_99.57	0.2082	0.4857	0.159	0.3935	46.97	0.696	0.601
evm.model.scaffold_99.42	0.4231	0.2404	0.4231	0.25	54.63	0.353	0.4
evm.model.scaffold_99.59	0.3382	0.2774	0.3349	0.3031	52.26	0.457	0.463
evm.model.scaffold_99.45	0.3694	0.3423	0.215	0.2857	58.82	0.509	0.504
evm.model.scaffold_99.20	0.3604	0.3452	0.2485	0.3087	55.32	0.509	0.468
evm.model.scaffold_99.79	0.3522	0.3468	0.2225	0.4249	54.87	0.566	0.488
evm.model.scaffold_99.74	0.4324	0.2176	0.3433	0.2381	55.54	0.358	0.432
evm.model.scaffold_99.37	0.1349	0.559	0.1266	0.4384	43.97	0.787	0.58
evm.model.scaffold_99.55	0.4525	0.1899	0.3423	0.2815	51.85	0.353	0.386
evm.model.scaffold_99.51	0.396	0.3135	0.2194	0.3523	54.52	0.509	0.499
evm.model.scaffold_99.28	0.3882	0.2392	0.272	0.2944	51.8	0.44	0.496
evm.model.scaffold_99.56	0.4388	0.2194	0.39	0.2413	52.51	0.347	0.418
evm.model.scaffold_99.75	0.4519	0.2312	0.2842	0.2793	56.38	0.403	0.488
evm.model.scaffold_99.19	0.3458	0.2056	0.4894	0.2125	46.54	0.32	0.379
evm.model.scaffold_99.25	0.4307	0.1752	0.3644	0.278	47.92	0.36	0.443
evm.model.scaffold_99.52	0.4179	0.2736	0.3464	0.2102	58.74	0.376	0.392
evm.model.scaffold_99.70	0.4729	0.172	0.3231	0.2557	50.83	0.338	0.447
evm.model.scaffold_99.12	0.3574	0.3213	0.2089	0.3447	53.35	0.523	0.478
evm.model.scaffold_99.31	0.4955	0.2072	0.3271	0.23	46.54	0.338	0.427
evm.model.scaffold_99.68	0.4211	0.2281	0.3791	0.3018	57.96	0.39	0.416
evm.model.scaffold_99.36	0.3007	0.4231	0.15	0.3259	55.02	0.614	0.549
evm.model.scaffold_99.41	0.2837	0.3664	0.3285	0.2776	50.87	0.51	0.492
evm.model.scaffold_99.16	0.2816	0.3592	0.3922	0.1563	52.24	0.43	0.495
evm.model.scaffold_99.29	0.3146	0.1798	0.38	0.3814	50.62	0.445	0.471
evm.model.scaffold_99.78	0.4076	0.1896	0.3816	0.2804	51.57	0.36	0.427
evm.model.scaffold_99.80	0.4217	0.2258	0.3205	0.2868	54.87	0.399	0.429
evm.model.scaffold_99.13	0.3926	0.2709	0.3373	0.2237	52.29	0.396	0.438
evm.model.scaffold_99.53	0.3605	0.2884	0.3481	0.2638	55.31	0.432	0.437
evm.model.scaffold_99.30	0.4118	0.1294	0.369	0.3462	52.16	0.365	0.386
evm.model.scaffold_99.10	0.4246	0.2523	0.3199	0.2847	53.38	0.407	0.45
evm.model.scaffold_99.33	0.4681	0.1838	0.3547	0.2743	49.73	0.349	0.414
evm.model.scaffold_99.5	0.3225	0.3469	0.2391	0.3794	56.95	0.557	0.512
evm.model.scaffold_99.73	0.3174	0.3458	0.2855	0.3097	55.84	0.512	0.485
evm.model.scaffold_99.67	0.3539	0.3315	0.2614	0.2965	52.67	0.502	0.493
evm.model.scaffold_99.18	0.4097	0.2028	0.375	0.2358	52.59	0.343	0.433
evm.model.scaffold_99.62	0.2683	0.3756	0.2423	0.3048	57.31	0.568	0.548
evm.model.scaffold_99.60	0.372	0.3482	0.2609	0.2491	56.39	0.479	0.514
evm.model.scaffold_99.48	0.1916	0.5159	0.1175	0.3445	45.3	0.731	0.606
evm.model.scaffold_99.34	0.2211	0.4579	0.3	0.2663	52.16	0.579	0.499
evm.model.scaffold_99.22	0.4984	0.2131	0.2891	0.2639	49.18	0.365	0.446
evm.model.scaffold_99.63	0.3281	0.3027	0.2956	0.3012	58.18	0.478	0.469
evm.model.scaffold_99.15	0.3262	0.3219	0.2449	0.3315	53.69	0.523	0.525
evm.model.scaffold_99.46	0.3953	0.3081	0.3114	0.2288	54.92	0.423	0.438
evm.model.scaffold_157.9	0.5424	0.1585	0.3697	0.2173	47.4	0.282	0.39
evm.model.scaffold_157.13	0.3982	0.3451	0.1923	0.2079	51.91	0.48	0.514
evm.model.scaffold_157.8	0.3103	0.3103	0.3293	0.2658	52	0.471	0.503
evm.model.scaffold_157.7	0.4131	0.2246	0.2875	0.3408	53.72	0.435	0.442
evm.model.scaffold_157.17	0.4577	0.2192	0.3799	0.2944	52.65	0.368	0.417
evm.model.scaffold_157.16	0.4824	0.2118	0.3028	0.2268	52.07	0.349	0.459
evm.model.scaffold_157.4	0.4539	0.1937	0.4553	0.1862	47.19	0.288	0.423
evm.model.scaffold_157.10	0.3236	0.2507	0.1885	0.4703	50.32	0.587	0.543
evm.model.scaffold_157.12	0.5514	0.1402	0.3723	0.2093	53.93	0.26	0.376
evm.model.scaffold_157.2	0.4808	0.1987	0.3623	0.2126	49.09	0.317	0.412
evm.model.scaffold_157.6	0.3757	0.2155	0.3526	0.2611	51.85	0.389	0.477
evm.model.scaffold_180.1	0.3626	0.1978	0.2247	0.3953	52.28	0.495	0.55
evm.model.scaffold_311.23	0.4362	0.2156	0.3434	0.2516	54.24	0.366	0.455
evm.model.scaffold_311.41	0.1703	0.559	0.2163	0.2165	45.39	0.669	0.562
evm.model.scaffold_311.9	0.265	0.2871	0.2201	0.4521	56.27	0.595	0.545
evm.model.scaffold_311.4	0.4948	0.1626	0.3097	0.2709	53.71	0.337	0.455
evm.model.scaffold_311.18	0.3409	0.1818	0.3494	0.321	57.26	0.416	0.475
evm.model.scaffold_311.34	0.4606	0.2033	0.3674	0.2087	51.74	0.326	0.439
evm.model.scaffold_311.5	0.4188	0.2112	0.3612	0.2643	53.15	0.368	0.422
evm.model.scaffold_311.10	0.462	0.2538	0.3413	0.1994	52.82	0.348	0.404
evm.model.scaffold_311.32	0.4381	0.21	0.3275	0.3302	53.7	0.403	0.45
evm.model.scaffold_311.29	0.2772	0.2277	0.2562	0.4083	55.37	0.55	0.607
evm.model.scaffold_311.40	0.4637	0.2011	0.3352	0.2788	55.9	0.364	0.398
evm.model.scaffold_311.15	0.439	0.1341	0.3056	0.3478	46.1	0.376	0.451
evm.model.scaffold_311.24	0.3913	0.1884	0.4315	0.2254	56.48	0.331	0.488
evm.model.scaffold_311.36	0.4501	0.2148	0.3056	0.2689	53.34	0.382	0.428
evm.model.scaffold_311.30	0.5106	0.1596	0.3095	0.3375	47.29	0.362	0.443
evm.model.scaffold_311.20	0.3888	0.2683	0.358	0.2634	55.92	0.404	0.432
evm.model.scaffold_311.28	0.3871	0.2688	0.3373	0.1884	50.41	0.373	0.41
evm.model.scaffold_311.31	0.4392	0.2255	0.3268	0.2864	52.54	0.392	0.467
evm.model.scaffold_311.19	0.4167	0.2431	0.3643	0.2532	52.37	0.376	0.426
evm.model.scaffold_311.45	0.4381	0.2474	0.3622	0.2456	54.87	0.372	0.417
evm.model.scaffold_311.2	0.4949	0.1803	0.3588	0.2535	48.93	0.326	0.419
evm.model.scaffold_334.7	0.4396	0.2418	0.2143	0.2593	51.52	0.426	0.515
evm.model.scaffold_334.6	0.4276	0.1711	0.2934	0.3806	42.75	0.427	0.447
evm.model.scaffold_334.2	0.3346	0.3496	0.3007	0.2917	52.56	0.497	0.469
evm.model.scaffold_334.1_evm.model.scaffold_334.17	0.3911	0.2698	0.3307	0.2521	55.33	0.412	0.449
evm.model.scaffold_334.3	0.4897	0.1678	0.3194	0.2753	44.01	0.34	0.403
evm.model.scaffold_334.9	0.3451	0.3098	0.3009	0.3189	54.18	0.487	0.487
evm.model.scaffold_334.10	0.3365	0.3635	0.2611	0.3049	54.53	0.521	0.482
evm.model.scaffold_334.5	0.3718	0.3631	0.2161	0.3299	50.6	0.532	0.496
evm.model.scaffold_375.676	0.3174	0.3952	0.3377	0.203	49.28	0.472	0.449
evm.model.scaffold_375.296	0.4244	0.2288	0.3013	0.2987	48.47	0.412	0.463
evm.model.scaffold_375.317	0.3655	0.2414	0.3525	0.2969	56.23	0.417	0.464
evm.model.scaffold_375.72	0.3351	0.2338	0.3438	0.2699	56.37	0.416	0.468
evm.model.scaffold_375.440	0.2788	0.3429	0.2095	0.3907	54	0.587	0.503
evm.model.scaffold_375.38	0.387	0.272	0.3444	0.2566	53.04	0.412	0.45
evm.model.scaffold_375.111	0.2624	0.4823	0.1311	0.3777	49.72	0.679	0.573
evm.model.scaffold_375.493	0.4178	0.1974	0.3808	0.2623	52.46	0.354	0.431
evm.model.scaffold_375.349	0.3822	0.2699	0.3996	0.1926	51.12	0.367	0.421
evm.model.scaffold_375.101_evm.model.scaffold_375.102	0.4015	0.2555	0.2917	0.2635	56.34	0.417	0.455
evm.model.scaffold_375.355	0.3556	0.4222	0.1026	0.2432	47.08	0.583	0.574
evm.model.scaffold_375.107	0.4908	0.2125	0.3117	0.3049	54.74	0.38	0.477
evm.model.scaffold_375.206	0.269	0.2924	0.3516	0.345	52.24	0.498	0.476
evm.model.scaffold_375.759	0.4798	0.2018	0.2857	0.2053	52.76	0.34	0.496
evm.model.scaffold_375.385	0.3172	0.3384	0.2276	0.3207	53.57	0.538	0.523
evm.model.scaffold_375.402	0.4026	0.2792	0.3346	0.2723	50.29	0.418	0.418
evm.model.scaffold_375.76	0.3431	0.1667	0.2887	0.4505	46.39	0.479	0.447
evm.model.scaffold_375.448	0.3557	0.2729	0.355	0.2779	52.25	0.428	0.457
evm.model.scaffold_375.407	0.425	0.2393	0.3195	0.3211	52.94	0.417	0.44
evm.model.scaffold_375.524	0.4827	0.171	0.3863	0.1745	46.25	0.274	0.411
evm.model.scaffold_375.530	0.4161	0.2292	0.3469	0.2737	52.82	0.388	0.444
evm.model.scaffold_375.570	0.4825	0.1888	0.3415	0.2909	53.03	0.347	0.403
evm.model.scaffold_375.113	0.1688	0.5455	0.1348	0.3364	43.43	0.741	0.652
evm.model.scaffold_375.171	0.3585	0.2893	0.2806	0.3507	46.34	0.492	0.448
evm.model.scaffold_375.484	0.4118	0.2059	0.3158	0.2727	49.17	0.385	0.461
evm.model.scaffold_375.122	0.4174	0.1983	0.3436	0.3009	50.97	0.387	0.434
evm.model.scaffold_375.351	0.2898	0.3394	0.3514	0.2686	61	0.483	0.454
evm.model.scaffold_375.630	0.4068	0.2415	0.3562	0.2443	54.72	0.383	0.468
evm.model.scaffold_375.239	0.1454	0.6211	0.1024	0.3077	38.24	0.788	0.625
evm.model.scaffold_375.292	0.4322	0.2418	0.3525	0.2218	47.67	0.366	0.427
evm.model.scaffold_375.712	0.4587	0.2015	0.3716	0.2385	55.71	0.338	0.44
evm.model.scaffold_375.224	0.3894	0.2814	0.4043	0.2039	54.14	0.377	0.423
evm.model.scaffold_375.348	0.4004	0.2451	0.3832	0.2105	51.7	0.359	0.421
evm.model.scaffold_375.495	0.4417	0.2226	0.3168	0.2636	55.22	0.377	0.459
evm.model.scaffold_375.453	0.3846	0.1635	0.4667	0.2651	40.82	0.322	0.417
evm.model.scaffold_375.545	0.4947	0.1649	0.3333	0.2414	46.11	0.32	0.417
evm.model.scaffold_375.504	0.4519	0.2378	0.3129	0.2197	52.53	0.357	0.424
evm.model.scaffold_375.779	0.5062	0.1605	0.3558	0.307	50.14	0.347	0.429
evm.model.scaffold_375.360	0.3258	0.3154	0.3093	0.2884	54.99	0.479	0.462
evm.model.scaffold_375.633	0.4144	0.2007	0.4154	0.3064	49.76	0.377	0.407
evm.model.scaffold_375.679	0.4416	0.2035	0.3131	0.2326	52.51	0.357	0.467
evm.model.scaffold_375.496	0.4605	0.2039	0.3382	0.2674	54.05	0.36	0.442
evm.model.scaffold_375.32	0.4293	0.1902	0.3759	0.2714	52.52	0.353	0.428
evm.model.scaffold_375.287	0.4323	0.2162	0.3113	0.3112	52.62	0.4	0.424
evm.model.scaffold_375.300	0.2969	0.3073	0.3444	0.2346	50.21	0.449	0.484
evm.model.scaffold_375.189	0.3521	0.338	0.3067	0.3731	43.3	0.505	0.426
evm.model.scaffold_375.731	0.4409	0.1613	0.3333	0.2768	50.88	0.354	0.428
evm.model.scaffold_375.628	0.3408	0.2626	0.4142	0.2416	44.6	0.388	0.404
evm.model.scaffold_375.222	0.3684	0.2481	0.4095	0.2255	54	0.378	0.439
evm.model.scaffold_375.401	0.3774	0.1509	0.3868	0.4632	41.18	0.426	0.375
evm.model.scaffold_375.621	0.3402	0.2887	0.3176	0.3562	59.49	0.474	0.433
evm.model.scaffold_375.69	0.4159	0.2508	0.3327	0.2565	51.68	0.391	0.427
evm.model.scaffold_375.764	0.3938	0.2513	0.3314	0.2852	57.62	0.41	0.446
evm.model.scaffold_375.243	0.3663	0.3086	0.2405	0.2434	53.46	0.471	0.526
evm.model.scaffold_375.2	0.2872	0.3138	0.2323	0.4293	59.18	0.585	0.541
evm.model.scaffold_375.770	0.3536	0.1657	0.3846	0.2832	44.89	0.371	0.463
evm.model.scaffold_375.649.2	0.3668	0.2696	0.3708	0.2843	56.23	0.423	0.47
evm.model.scaffold_375.64.2	0.3448	0.319	0.1529	0.4589	51.4	0.606	0.538
evm.model.scaffold_375.609	0.4059	0.2673	0.3291	0.2	53.45	0.385	0.474
evm.model.scaffold_375.575	0.3484	0.2645	0.3989	0.3054	52.33	0.424	0.431
evm.model.scaffold_375.608	0.4505	0.2252	0.2418	0.3107	53.79	0.422	0.477
evm.model.scaffold_375.720	0.3333	0.3865	0.3619	0.1535	52.95	0.437	0.489
evm.model.scaffold_375.417	0.4015	0.3431	0.2963	0.2176	53.27	0.437	0.456
evm.model.scaffold_375.774	0.3442	0.3182	0.1696	0.4618	49.48	0.592	0.483
evm.model.scaffold_375.176	0.4032	0.2476	0.3517	0.2744	51.96	0.397	0.405
evm.model.scaffold_375.536	0.3299	0.2887	0.2784	0.3478	50.22	0.504	0.485
evm.model.scaffold_375.410	0.4518	0.2215	0.3679	0.2367	53.13	0.35	0.425
evm.model.scaffold_375.364	0.326	0.3663	0.3438	0.2	53.73	0.461	0.457
evm.model.scaffold_375.177	0.4913	0.1609	0.288	0.2071	41.39	0.3	0.448
evm.model.scaffold_375.331	0.3567	0.3439	0.3065	0.2455	56.29	0.463	0.453
evm.model.scaffold_375.714	0.4066	0.2637	0.3495	0.3814	55.49	0.455	0.41
evm.model.scaffold_375.28	0.3347	0.3606	0.3402	0.2067	51.78	0.458	0.489
evm.model.scaffold_375.474	0.4504	0.2553	0.2751	0.2543	52.89	0.401	0.458
evm.model.scaffold_375.483	0.2818	0.3094	0.2805	0.2994	53.48	0.515	0.547
evm.model.scaffold_375.645	0.3855	0.2517	0.3743	0.2443	52.77	0.385	0.418
evm.model.scaffold_375.523	0.458	0.1641	0.4184	0.2277	47.46	0.299	0.422
evm.model.scaffold_375.40	0.1563	0.6094	0.1013	0.4933	39.86	0.809	0.587
evm.model.scaffold_375.232	0.4348	0.2776	0.3162	0.2397	51.7	0.402	0.432
evm.model.scaffold_375.555	0.4286	0.2479	0.3053	0.3175	53.05	0.424	0.435
evm.model.scaffold_375.604	0.3025	0.3613	0.3333	0.1974	53.88	0.468	0.46
evm.model.scaffold_375.229	0.4404	0.2022	0.276	0.2525	53.87	0.378	0.471
evm.model.scaffold_375.314	0.3745	0.2099	0.3787	0.2232	52.84	0.359	0.468
evm.model.scaffold_375.625	0.4343	0.196	0.4402	0.2288	50.95	0.32	0.426
evm.model.scaffold_375.244	0.4519	0.1443	0.3922	0.2758	51.22	0.332	0.45
evm.model.scaffold_375.42	0.4371	0.2335	0.381	0.2379	51.94	0.356	0.419
evm.model.scaffold_375.26	0.4403	0.2069	0.3918	0.2405	51.73	0.339	0.414
evm.model.scaffold_375.639	0.4846	0.1949	0.2778	0.346	49.28	0.394	0.404
evm.model.scaffold_375.485	0.3498	0.3184	0.3109	0.1283	58.82	0.408	0.514
evm.model.scaffold_375.290	0.2945	0.4007	0.2846	0.2479	55.48	0.528	0.518
evm.model.scaffold_375.215	0.2303	0.4242	0.205	0.366	52.18	0.64	0.544
evm.model.scaffold_375.632	0.3929	0.2857	0.2558	0.2752	56.62	0.445	0.441
evm.model.scaffold_375.367	0.52	0.16	0.3839	0.213	53.36	0.285	0.41
evm.model.scaffold_375.716	0.34	0.28	0.2727	0.3	47.92	0.475	0.488
evm.model.scaffold_375.527.1	0.4221	0.2792	0.2961	0.2721	52.1	0.421	0.43
evm.model.scaffold_375.233	0.4656	0.1685	0.3469	0.2382	51.39	0.32	0.439
evm.model.scaffold_375.105	0.4586	0.1429	0.4628	0.2087	49.29	0.269	0.406
evm.model.scaffold_375.285	0.4538	0.1401	0.2278	0.3553	49.39	0.405	0.474
evm.model.scaffold_375.11	0.4157	0.2584	0.36	0.2429	61	0.385	0.428
evm.model.scaffold_375.168	0.4672	0.199	0.3258	0.2681	51.69	0.359	0.439
evm.model.scaffold_375.684	0.3724	0.2379	0.2862	0.3421	55.97	0.458	0.461
evm.model.scaffold_375.207	0.3231	0.3487	0.2886	0.2872	55.44	0.502	0.485
evm.model.scaffold_375.592	0.4733	0.2519	0.3738	0.2043	53.46	0.338	0.404
evm.model.scaffold_375.664	0.4409	0.2151	0.2941	0.2623	55.23	0.371	0.373
evm.model.scaffold_375.744	0.416	0.2605	0.2576	0.2623	55.37	0.423	0.464
evm.model.scaffold_375.155	0.4563	0.2258	0.299	0.2792	52.68	0.388	0.438
evm.model.scaffold_375.240	0.4055	0.2627	0.3184	0.2577	57.61	0.413	0.476
evm.model.scaffold_375.179	0.4577	0.187	0.305	0.2826	51.39	0.365	0.435
evm.model.scaffold_375.88	0.3648	0.3208	0.2829	0.2734	55.07	0.468	0.455
evm.model.scaffold_375.603	0.2872	0.3476	0.3276	0.2566	55.5	0.497	0.508
evm.model.scaffold_375.476	0.2322	0.4597	0.1964	0.3037	50.85	0.635	0.632
evm.model.scaffold_375.65	0.4583	0.1931	0.3245	0.286	53.55	0.364	0.448
evm.model.scaffold_375.341.1	0.4046	0.2486	0.4048	0.1875	48.89	0.346	0.449
evm.model.scaffold_375.15	0.4649	0.1886	0.3381	0.2492	51.66	0.34	0.42
evm.model.scaffold_375.518	0.4433	0.1921	0.3485	0.2652	51.48	0.354	0.427
evm.model.scaffold_375.108	0.4327	0.2799	0.2762	0.268	53	0.425	0.43
evm.model.scaffold_375.270	0.4455	0.2575	0.2775	0.2737	51.84	0.412	0.434
evm.model.scaffold_375.499	0.3927	0.2775	0.2613	0.377	51.56	0.49	0.452
evm.model.scaffold_375.241	0.4277	0.1792	0.4068	0.2316	49.68	0.319	0.429
evm.model.scaffold_375.217	0.371	0.3077	0.3069	0.2368	55.9	0.44	0.491
evm.model.scaffold_375.228	0.4602	0.2035	0.396	0.2423	52.95	0.336	0.417
evm.model.scaffold_375.262	0.4621	0.2746	0.2618	0.2302	53.34	0.4	0.444
evm.model.scaffold_375.129	0.4559	0.2059	0.4675	0.2273	58.87	0.302	0.32
evm.model.scaffold_375.460.2	0.4599	0.1254	0.3786	0.2795	46.12	0.31	0.425
evm.model.scaffold_375.656	0.3037	0.2938	0.3219	0.3571	53.94	0.499	0.459
evm.model.scaffold_375.181	0.3795	0.2923	0.2591	0.3027	59.5	0.477	0.446
evm.model.scaffold_375.192	0.2774	0.3645	0.3358	0.24	55.93	0.496	0.49
evm.model.scaffold_375.8	0.2767	0.2767	0.2045	0.4942	53.29	0.612	0.528
evm.model.scaffold_375.124	0.2326	0.4352	0.1301	0.4591	48.57	0.703	0.607
evm.model.scaffold_375.333	0.4518	0.1827	0.3966	0.1925	48.43	0.295	0.405
evm.model.scaffold_375.4	0.4244	0.3023	0.2422	0.2752	56.7	0.454	0.479
evm.model.scaffold_375.542	0.3713	0.2911	0.2883	0.256	58.72	0.445	0.485
evm.model.scaffold_375.202	0.4407	0.2481	0.3278	0.1991	54.76	0.359	0.455
evm.model.scaffold_375.237	0.4579	0.1877	0.3301	0.2697	52.48	0.359	0.459
evm.model.scaffold_375.46	0.4461	0.2402	0.387	0.3148	55.21	0.394	0.427
evm.model.scaffold_375.580	0.3694	0.2611	0.3735	0.2789	48.85	0.413	0.432
evm.model.scaffold_375.58	0.422	0.1957	0.3445	0.2837	53.17	0.374	0.454
evm.model.scaffold_375.650	0.399	0.3103	0.3	0.3402	57.74	0.478	0.477
evm.model.scaffold_375.403	0.3645	0.2103	0.3565	0.285	50.44	0.397	0.434
evm.model.scaffold_375.114	0.1736	0.5537	0.1333	0.3628	45.31	0.745	0.562
evm.model.scaffold_375.681	0.4412	0.1961	0.344	0.2222	56.14	0.343	0.456
evm.model.scaffold_375.703	0.3636	0.2727	0.1928	0.5065	55.96	0.552	0.447
evm.model.scaffold_375.56	0.4483	0.2028	0.3305	0.2767	49.59	0.375	0.467
evm.model.scaffold_375.444	0.4003	0.2163	0.2861	0.3185	53.16	0.434	0.505
evm.model.scaffold_375.607.3	0.4171	0.2558	0.2508	0.303	54.03	0.444	0.482
evm.model.scaffold_375.384	0.3257	0.3429	0.2771	0.2763	57.95	0.498	0.469
evm.model.scaffold_375.338	0.4731	0.2154	0.4242	0.1394	51.47	0.278	0.395
evm.model.scaffold_375.415	0.4247	0.3127	0.2636	0.2282	55.86	0.432	0.465
evm.model.scaffold_375.457	0.2035	0.3779	0.265	0.3795	56.57	0.614	0.533
evm.model.scaffold_375.325	0.2886	0.4726	0.0963	0.3867	46.63	0.685	0.568
evm.model.scaffold_375.480	0.3158	0.2421	0.3444	0.3636	47.79	0.474	0.475
evm.model.scaffold_375.562	0.303	0.3805	0.2137	0.3114	55.05	0.563	0.536
evm.model.scaffold_375.205	0.4387	0.2025	0.3591	0.2974	51.63	0.38	0.424
evm.model.scaffold_375.400	0.4821	0.2036	0.3029	0.2744	55.03	0.358	0.397
evm.model.scaffold_375.173	0.4444	0.1818	0.3373	0.2564	52.68	0.345	0.445
evm.model.scaffold_375.245	0.3878	0.1918	0.4095	0.2864	46.93	0.358	0.408
evm.model.scaffold_375.146	0.2574	0.41	0.2879	0.2432	53.67	0.545	0.532
evm.model.scaffold_375.303.3	0.4907	0.1801	0.3103	0.2556	52.45	0.337	0.397
evm.model.scaffold_375.211	0.3883	0.2921	0.3333	0.2301	58.1	0.414	0.448
evm.model.scaffold_375.404	0.4386	0.2476	0.3282	0.249	53.09	0.384	0.447
evm.model.scaffold_375.528	0.4397	0.2074	0.3405	0.2826	52.71	0.375	0.425
evm.model.scaffold_375.638	0.4444	0.2007	0.3746	0.2765	48.55	0.367	0.418
evm.model.scaffold_375.471	0.3399	0.4212	0.2262	0.2704	53.22	0.547	0.523
evm.model.scaffold_375.739	0.4553	0.2033	0.3208	0.2083	52.82	0.333	0.449
evm.model.scaffold_375.196	0.4873	0.1522	0.32	0.3025	48.22	0.345	0.432
evm.model.scaffold_375.477	0.1731	0.5705	0.1447	0.3077	46.46	0.731	0.61
evm.model.scaffold_375.517	0.2975	0.2532	0.2981	0.3007	51.3	0.475	0.509
evm.model.scaffold_375.186	0.3874	0.288	0.2674	0.3056	60.77	0.47	0.433
evm.model.scaffold_375.567	0.4628	0.2134	0.3493	0.2334	52	0.344	0.432
evm.model.scaffold_375.624	0.4066	0.2527	0.2857	0.3284	51.81	0.433	0.4
evm.model.scaffold_375.550	0.3095	0.3295	0.3137	0.3017	49.99	0.494	0.456
evm.model.scaffold_375.773	0.5276	0.1614	0.2888	0.3404	50.43	0.381	0.45
evm.model.scaffold_375.139	0.3761	0.2661	0.396	0.2609	58.13	0.396	0.438
evm.model.scaffold_375.132	0.375	0.276	0.2353	0.3446	59.5	0.496	0.49
evm.model.scaffold_375.516	0.4579	0.2033	0.3105	0.2695	54.1	0.366	0.427
evm.model.scaffold_375.138	0.427	0.236	0.4086	0.2791	52.73	0.372	0.398
evm.model.scaffold_375.183	0.4	0.2923	0.2873	0.2601	61	0.44	0.423
evm.model.scaffold_375.123	0.3697	0.3137	0.2244	0.3392	55.74	0.509	0.469
evm.model.scaffold_375.582	0.33	0.35	0.2247	0.3205	44.98	0.531	0.494
evm.model.scaffold_375.188	0.445	0.2072	0.3436	0.2597	54.37	0.361	0.443
evm.model.scaffold_375.197	0.2929	0.2887	0.4025	0.2941	51.36	0.448	0.446
evm.model.scaffold_375.399	0.4706	0.2353	0.1837	0.382	47.89	0.468	0.441
evm.model.scaffold_375.558	0.4512	0.1907	0.3171	0.3211	56.09	0.386	0.422
evm.model.scaffold_375.301	0.3653	0.2695	0.4038	0.25	51.58	0.394	0.431
evm.model.scaffold_375.777	0.4337	0.2771	0.2532	0.3108	48.47	0.451	0.469
evm.model.scaffold_375.169	0.4625	0.2411	0.3026	0.2775	55.14	0.39	0.425
evm.model.scaffold_375.170	0.5154	0.2	0.3451	0.2264	50.58	0.321	0.424
evm.model.scaffold_375.143.1	0.4979	0.176	0.3588	0.3214	51.08	0.367	0.435
evm.model.scaffold_375.95	0.5116	0.2016	0.2857	0.2621	57.66	0.351	0.439
evm.model.scaffold_375.283	0.2556	0.3667	0.2568	0.3099	61	0.567	0.569
evm.model.scaffold_375.704	0.2636	0.3455	0.3407	0.2791	48.5	0.508	0.481
evm.model.scaffold_375.749	0.4	0.3312	0.2319	0.2878	47.38	0.486	0.474
evm.model.scaffold_375.564	0.4096	0.3208	0.2846	0.2749	50.22	0.457	0.458
evm.model.scaffold_375.96	0.3438	0.4063	0.2037	0.1961	54.01	0.522	0.515
evm.model.scaffold_375.185	0.3983	0.2034	0.3302	0.33	58.19	0.41	0.431
evm.model.scaffold_375.781	0.3163	0.2951	0.3748	0.3122	52.04	0.463	0.476
evm.model.scaffold_375.289	0.3967	0.2197	0.3768	0.2481	54.84	0.368	0.446
evm.model.scaffold_375.675	0.4487	0.1811	0.3946	0.2434	51.46	0.33	0.436
evm.model.scaffold_375.510	0.4437	0.2042	0.3465	0.3652	46.92	0.399	0.424
evm.model.scaffold_375.266	0.4841	0.1952	0.3516	0.2471	50.02	0.332	0.406
evm.model.scaffold_375.87	0.3563	0.2414	0.2414	0.4198	54.45	0.514	0.481
evm.model.scaffold_375.618	0.4378	0.2396	0.2514	0.319	54.93	0.424	0.421
evm.model.scaffold_375.119	0.4343	0.1965	0.3774	0.2696	51.35	0.355	0.415
evm.model.scaffold_375.277	0.3989	0.2623	0.3333	0.2569	52.25	0.407	0.429
evm.model.scaffold_375.212	0.476	0.1845	0.3613	0.2762	54.63	0.349	0.436
evm.model.scaffold_375.234	0.3614	0.3072	0.3743	0.239	49.47	0.418	0.458
evm.model.scaffold_375.396	0.4109	0.2326	0.3431	0.2791	51.67	0.398	0.443
evm.model.scaffold_375.394	0.4	0.325	0.2646	0.3474	50.89	0.495	0.488
evm.model.scaffold_375.216.1	0.4841	0.1927	0.3669	0.2131	51.79	0.317	0.43
evm.model.scaffold_375.318	0.4101	0.2857	0.3122	0.2527	61	0.422	0.469
evm.model.scaffold_375.619	0.3452	0.3016	0.2715	0.3518	55.11	0.498	0.461
evm.model.scaffold_375.775	0.4038	0.1795	0.3527	0.2914	54.52	0.376	0.457
evm.model.scaffold_375.291	0.446	0.1655	0.3865	0.2426	48.63	0.318	0.447
evm.model.scaffold_375.16	0.4245	0.2612	0.2743	0.2573	57.33	0.413	0.449
evm.model.scaffold_375.511	0.4884	0.1881	0.3435	0.2255	52.93	0.323	0.44
evm.model.scaffold_375.765	0.3922	0.2494	0.349	0.2689	56.87	0.397	0.443
evm.model.scaffold_375.116	0.2119	0.5166	0.1149	0.3592	50.19	0.725	0.583
evm.model.scaffold_375.487	0.3	0.4235	0.1946	0.3333	56.33	0.594	0.505
evm.model.scaffold_375.323	0.3672	0.263	0.3295	0.2565	56.78	0.413	0.439
evm.model.scaffold_375.688	0.3115	0.459	0.1468	0.2913	50.39	0.614	0.55
evm.model.scaffold_375.544	0.3977	0.3392	0.2877	0.1933	55.44	0.433	0.463
evm.model.scaffold_375.734	0.4233	0.2593	0.3631	0.2025	46.95	0.365	0.417
evm.model.scaffold_375.195	0.3019	0.4906	0.1565	0.2946	51.56	0.62	0.508
evm.model.scaffold_375.335	0.4252	0.2211	0.3988	0.2069	52.08	0.334	0.41
evm.model.scaffold_375.507	0.2536	0.4214	0.1655	0.3321	49.19	0.639	0.602
evm.model.scaffold_375.556	0.3949	0.2675	0.2715	0.3406	54.13	0.464	0.451
evm.model.scaffold_375.261.1	0.4663	0.2515	0.3007	0.2103	52.45	0.37	0.425
evm.model.scaffold_375.722	0.4767	0.1744	0.3624	0.2659	50.66	0.33	0.413
evm.model.scaffold_375.13	0.2537	0.3902	0.2404	0.314	56.61	0.583	0.533
evm.model.scaffold_375.320	0.4518	0.1615	0.4254	0.246	50.59	0.314	0.43
evm.model.scaffold_375.594	0.307	0.3544	0.3357	0.1995	48.6	0.457	0.466
evm.model.scaffold_375.279	0.4111	0.2091	0.2966	0.3074	59.16	0.412	0.46
evm.model.scaffold_375.24	0.3974	0.2119	0.3485	0.2988	51.11	0.396	0.443
evm.model.scaffold_375.191	0.4464	0.2883	0.2545	0.2691	52.35	0.427	0.454
evm.model.scaffold_375.687	0.4545	0.2078	0.3057	0.3154	50.32	0.401	0.427
evm.model.scaffold_375.395	0.381	0.3114	0.2939	0.3203	44.64	0.475	0.49
evm.model.scaffold_375.115	0.3704	0.2308	0.3079	0.326	58.87	0.44	0.468
evm.model.scaffold_375.145	0.4313	0.2	0.4079	0.2199	56.76	0.325	0.423
evm.model.scaffold_375.392	0.3557	0.3004	0.3348	0.2731	59.31	0.447	0.459
evm.model.scaffold_375.361	0.4343	0.1717	0.3735	0.2703	58.65	0.333	0.427
evm.model.scaffold_375.251	0.5579	0.1579	0.1733	0.4118	44.79	0.394	0.451
evm.model.scaffold_375.7	0.4628	0.2086	0.3349	0.2416	52.9	0.352	0.429
evm.model.scaffold_375.273	0.3875	0.275	0.3684	0.1806	56.33	0.372	0.495
evm.model.scaffold_375.117	0.431	0.2241	0.2995	0.2709	53.38	0.393	0.461
evm.model.scaffold_375.602.1	0.2966	0.403	0.2661	0.2727	53.3	0.54	0.508
evm.model.scaffold_375.509	0.3616	0.3137	0.2576	0.298	58.03	0.492	0.516
evm.model.scaffold_375.644	0.4578	0.1566	0.3544	0.3571	46.31	0.365	0.394
evm.model.scaffold_375.469	0.4188	0.1187	0.4104	0.2938	44.94	0.324	0.413
evm.model.scaffold_375.278	0.4072	0.2398	0.2915	0.2513	52.93	0.403	0.429
evm.model.scaffold_375.479	0.3448	0.3103	0.3185	0.2691	51.05	0.458	0.447
evm.model.scaffold_375.501.1	0.3156	0.2493	0.4219	0.2388	48.22	0.396	0.47
evm.model.scaffold_375.533	0.4433	0.2269	0.2861	0.2874	52	0.395	0.423
evm.model.scaffold_375.166	0.4286	0.1939	0.3397	0.3503	52.2	0.408	0.438
evm.model.scaffold_375.47.5	0.3929	0.2468	0.3778	0.2669	52.3	0.392	0.437
evm.model.scaffold_375.147	0.5181	0.1558	0.3407	0.2374	47.52	0.301	0.409
evm.model.scaffold_375.506	0.4798	0.289	0.2721	0.1799	49.11	0.379	0.449
evm.model.scaffold_375.293	0.4078	0.2482	0.3574	0.249	43.91	0.385	0.424
evm.model.scaffold_375.573	0.4121	0.1939	0.3878	0.2834	53.96	0.371	0.454
evm.model.scaffold_375.9	0.3789	0.348	0.3052	0.2426	55.21	0.459	0.455
evm.model.scaffold_375.652	0.2283	0.5748	0.1471	0.1616	33.95	0.669	0.592
evm.model.scaffold_375.719	0.3333	0.2153	0.4533	0.2628	49.48	0.366	0.401
evm.model.scaffold_375.631	0.4307	0.146	0.4194	0.2784	50.41	0.335	0.447
evm.model.scaffold_375.747	0.3275	0.3129	0.3121	0.2841	51.36	0.476	0.481
evm.model.scaffold_375.534	0.513	0.2273	0.3504	0.2344	50.47	0.339	0.428
evm.model.scaffold_375.60	0.3162	0.3004	0.2317	0.3128	55.95	0.518	0.533
evm.model.scaffold_375.389	0.2804	0.4561	0.2105	0.2597	47.52	0.586	0.523
evm.model.scaffold_375.737	0.4423	0.2654	0.3318	0.1768	42.88	0.36	0.434
evm.model.scaffold_375.634	0.619	0.131	0.3977	0.2143	42.71	0.25	0.403
evm.model.scaffold_375.156.2	0.4549	0.2218	0.3506	0.3114	54.99	0.383	0.403
evm.model.scaffold_375.657	0.3775	0.2868	0.3147	0.2861	53.92	0.443	0.441
evm.model.scaffold_375.581	0.4034	0.2332	0.3545	0.2462	50.24	0.375	0.435
evm.model.scaffold_375.67	0.3923	0.2231	0.3178	0.2484	53.66	0.386	0.446
evm.model.scaffold_375.470	0.3846	0.3504	0.2321	0.3173	53.14	0.51	0.474
evm.model.scaffold_375.599	0.37	0.3216	0.3224	0.2576	54.1	0.448	0.461
evm.model.scaffold_375.467	0.5385	0.1564	0.3179	0.2547	47.58	0.309	0.406
evm.model.scaffold_375.472	0.2542	0.3933	0.2033	0.386	49.13	0.625	0.554
evm.model.scaffold_375.780	0.2422	0.2606	0.3932	0.3363	48.87	0.478	0.518
evm.model.scaffold_375.363	0.3047	0.3692	0.3106	0.2335	56.52	0.497	0.472
evm.model.scaffold_375.160	0.1793	0.4348	0.125	0.4926	45.71	0.742	0.577
evm.model.scaffold_375.512	0.5109	0.1957	0.3596	0.1977	47.67	0.307	0.443
evm.model.scaffold_375.99	0.4114	0.267	0.3192	0.2697	55.73	0.415	0.465
evm.model.scaffold_375.623	0.3221	0.2886	0.363	0.3083	52.44	0.452	0.452
evm.model.scaffold_375.5	0.3404	0.3678	0.2738	0.2562	54.54	0.499	0.478
evm.model.scaffold_375.651	0.304	0.4205	0.2045	0.3535	52.19	0.597	0.516
evm.model.scaffold_375.97	0.3777	0.2582	0.231	0.4097	52.76	0.507	0.461
evm.model.scaffold_375.689	0.3955	0.1808	0.4725	0.2256	49.3	0.307	0.427
evm.model.scaffold_375.255	0.4241	0.2034	0.3783	0.2415	50.25	0.349	0.436
evm.model.scaffold_375.427	0.4839	0.2509	0.3195	0.2459	52.4	0.371	0.415
evm.model.scaffold_375.591	0.3552	0.2678	0.2	0.3313	51.96	0.51	0.558
evm.model.scaffold_375.327	0.2672	0.3534	0.3475	0.3588	49.99	0.524	0.451
evm.model.scaffold_375.200	0.4036	0.2509	0.3729	0.2453	55.84	0.378	0.447
evm.model.scaffold_375.468	0.4615	0.1903	0.3052	0.2424	50.47	0.347	0.456
evm.model.scaffold_375.248	0.4086	0.2742	0.3248	0.3108	52.29	0.433	0.454
evm.model.scaffold_375.311	0.354	0.2035	0.2645	0.4286	56.1	0.507	0.499
evm.model.scaffold_375.616	0.4784	0.1993	0.3775	0.2403	53.86	0.332	0.436
evm.model.scaffold_375.6	0.4481	0.2186	0.3333	0.3289	52.1	0.395	0.412
evm.model.scaffold_375.125	0.4153	0.2119	0.339	0.3211	46.49	0.403	0.409
evm.model.scaffold_375.187	0.3827	0.2908	0.2694	0.2903	56.96	0.466	0.444
evm.model.scaffold_375.520	0.3627	0.2941	0.31	0.3646	60.08	0.489	0.434
evm.model.scaffold_375.148	0.4375	0.225	0.4176	0.175	48.37	0.305	0.426
evm.model.scaffold_375.309	0.3053	0.2842	0.4135	0.28	52.45	0.433	0.424
evm.model.scaffold_375.150	0.4449	0.2796	0.257	0.2549	51.11	0.423	0.454
evm.model.scaffold_375.334	0.3818	0.2939	0.3825	0.2043	56.51	0.391	0.426
evm.model.scaffold_375.491	0.243	0.4194	0.3248	0.3182	52.86	0.558	0.508
evm.model.scaffold_375.626	0.447	0.1909	0.3006	0.3103	53.39	0.388	0.444
evm.model.scaffold_375.44	0.3418	0.3418	0.1951	0.3836	46.38	0.561	0.449
evm.model.scaffold_375.23	0.431	0.2529	0.2895	0.2847	42.69	0.417	0.431
evm.model.scaffold_375.332	0.359	0.3297	0.3468	0.2	57.01	0.428	0.447
evm.model.scaffold_375.49	0.4308	0.2564	0.3248	0.2378	50.05	0.384	0.412
evm.model.scaffold_375.718	0.5066	0.1759	0.3792	0.2562	50.1	0.312	0.409
evm.model.scaffold_375.118	0.4635	0.1901	0.2957	0.2486	49.57	0.357	0.462
evm.model.scaffold_375.158	0.3921	0.2817	0.3052	0.2606	57.45	0.429	0.454
evm.model.scaffold_375.288	0.2368	0.5132	0.2074	0.3099	46.09	0.649	0.561
evm.model.scaffold_375.135	0.5685	0.1438	0.3767	0.2465	46.98	0.289	0.421
evm.model.scaffold_375.398	0.4541	0.207	0.3159	0.2666	53.06	0.373	0.459
evm.model.scaffold_375.413	0.4224	0.3285	0.2324	0.2556	53.23	0.461	0.476
evm.model.scaffold_375.513	0.5294	0.2418	0.3309	0.2188	51.19	0.34	0.43
evm.model.scaffold_375.386	0.4207	0.2768	0.252	0.3553	53.28	0.47	0.454
evm.model.scaffold_375.746	0.3919	0.3176	0.2556	0.2756	56.95	0.471	0.495
evm.model.scaffold_375.553	0.2663	0.4306	0.1915	0.3783	51.56	0.634	0.544
evm.model.scaffold_375.103	0.5085	0.1984	0.3021	0.3225	50.31	0.383	0.441
evm.model.scaffold_375.525	0.4858	0.2217	0.2304	0.2826	51.64	0.402	0.473
evm.model.scaffold_375.164	0.4692	0.1838	0.3668	0.2241	50.93	0.316	0.417
evm.model.scaffold_375.733	0.2944	0.4113	0.2822	0.2447	57.7	0.532	0.481
evm.model.scaffold_375.409	0.4229	0.1865	0.429	0.2453	49.85	0.329	0.409
evm.model.scaffold_375.430	0.1808	0.5092	0.2412	0.2731	43.96	0.65	0.534
evm.model.scaffold_375.540	0.3759	0.3158	0.2655	0.2364	57.19	0.459	0.511
evm.model.scaffold_375.568	0.2873	0.3149	0.3636	0.3316	61	0.492	0.467
evm.model.scaffold_375.552	0.3404	0.2447	0.3964	0.2298	48.66	0.388	0.466
evm.model.scaffold_375.299	0.4141	0.1563	0.4521	0.2674	45.78	0.327	0.451
evm.model.scaffold_375.130	0.3778	0.2667	0.2083	0.3714	57.62	0.505	0.527
evm.model.scaffold_375.339	0.3911	0.2673	0.3882	0.2102	61	0.375	0.438
evm.model.scaffold_375.611	0.3709	0.3383	0.1336	0.3561	53.32	0.565	0.492
evm.model.scaffold_375.346	0.3621	0.3707	0.3043	0.1765	58.29	0.453	0.45
evm.model.scaffold_375.357	0.4722	0.213	0.48	0.1111	54.21	0.25	0.393
evm.model.scaffold_375.82	0.4538	0.1429	0.2456	0.3925	49.6	0.418	0.44
evm.model.scaffold_375.461.1	0.4536	0.2483	0.3556	0.244	49.12	0.368	0.415
evm.model.scaffold_375.721	0.4226	0.2528	0.3732	0.2424	51.49	0.375	0.44
evm.model.scaffold_375.438	0.4906	0.1887	0.3077	0.1667	44.74	0.292	0.4
evm.model.scaffold_375.387.1	0.4516	0.2419	0.2783	0.3009	59.27	0.415	0.446
evm.model.scaffold_375.547_evm.model.scaffold_375.548	0.3593	0.2663	0.3577	0.3127	51.84	0.435	0.428
evm.model.scaffold_375.428	0.3304	0.3192	0.2803	0.2659	57.39	0.483	0.472
evm.model.scaffold_375.636	0.4821	0.1964	0.2624	0.3631	50.1	0.406	0.411
evm.model.scaffold_375.10	0.4273	0.2364	0.3958	0.1494	56.34	0.315	0.414
evm.model.scaffold_375.257	0.269	0.2897	0.461	0.2286	42.18	0.416	0.491
evm.model.scaffold_375.120	0.3869	0.3095	0.3189	0.2057	57.01	0.418	0.479
evm.model.scaffold_375.253	0.3607	0.3014	0.2965	0.2917	54.35	0.469	0.473
evm.model.scaffold_375.12	0.4417	0.2167	0.3333	0.2523	46.79	0.371	0.45
evm.model.scaffold_375.73	0.3873	0.3382	0.2484	0.2237	56.91	0.464	0.478
evm.model.scaffold_375.551	0.381	0.2238	0.3602	0.2568	49.13	0.384	0.457
evm.model.scaffold_375.307	0.157	0.5017	0.1849	0.3701	46.18	0.717	0.601
evm.model.scaffold_375.673	0.3714	0.146	0.3744	0.3737	48.99	0.413	0.44
evm.model.scaffold_375.297	0.3636	0.2571	0.375	0.2326	50.64	0.388	0.436
evm.model.scaffold_375.655	0.4281	0.1667	0.4058	0.2708	49.04	0.335	0.415
evm.model.scaffold_375.165	0.4676	0.2066	0.3154	0.2669	51.78	0.365	0.429
evm.model.scaffold_375.219	0.4778	0.1945	0.2941	0.2789	50.21	0.366	0.419
evm.model.scaffold_375.85	0.2588	0.5294	0.1609	0.2651	46.24	0.65	0.583
evm.model.scaffold_375.665	0.4417	0.1463	0.375	0.2921	49.14	0.336	0.447
evm.model.scaffold_375.201	0.3479	0.3299	0.2141	0.3594	50.86	0.539	0.48
evm.model.scaffold_375.312	0.4511	0.1955	0.3279	0.3478	43.54	0.398	0.42
evm.model.scaffold_375.142	0.4173	0.2518	0.3534	0.2429	57.26	0.382	0.437
evm.model.scaffold_375.406	0.4498	0.1489	0.3559	0.2873	47.94	0.339	0.428
evm.model.scaffold_375.579	0.4759	0.1948	0.285	0.3151	49.26	0.38	0.426
evm.model.scaffold_375.268	0.3578	0.299	0.2206	0.1741	56.38	0.449	0.625
evm.model.scaffold_375.539	0.4969	0.2147	0.2538	0.2773	42.92	0.374	0.42
evm.model.scaffold_375.310	0.488	0.2297	0.3333	0.256	57.96	0.358	0.425
evm.model.scaffold_375.572	0.4545	0.1983	0.3158	0.3173	46.47	0.385	0.378
evm.model.scaffold_375.55	0.436	0.2284	0.2899	0.2996	50.46	0.41	0.442
evm.model.scaffold_375.220	0.3556	0.2519	0.4423	0.2079	53.58	0.369	0.437
evm.model.scaffold_375.126	0.45	0.1875	0.5125	0.1447	49.63	0.252	0.407
evm.model.scaffold_375.34	0.4617	0.1812	0.3275	0.2192	50.5	0.327	0.469
evm.model.scaffold_375.693	0.4068	0.2585	0.3449	0.2293	53.5	0.388	0.46
evm.model.scaffold_375.272	0.4167	0.225	0.3592	0.3163	51.08	0.4	0.439
evm.model.scaffold_375.449	0.2372	0.4038	0.2209	0.3742	47.46	0.624	0.53
evm.model.scaffold_375.738	0.358	0.3556	0.2776	0.2464	56.81	0.48	0.471
evm.model.scaffold_375.588	0.2312	0.289	0.1149	0.5833	49.73	0.712	0.607
evm.model.scaffold_375.717	0.3787	0.2868	0.2451	0.2917	47.58	0.471	0.477
evm.model.scaffold_375.50	0.4967	0.1809	0.3453	0.2446	50.88	0.325	0.433
evm.model.scaffold_375.184	0.3673	0.2959	0.2604	0.3098	61	0.485	0.45
evm.model.scaffold_375.724	0.368	0.3083	0.3183	0.1918	50.06	0.415	0.426
evm.model.scaffold_375.466	0.4536	0.1875	0.2888	0.3439	50.92	0.41	0.445
evm.model.scaffold_375.258	0.3668	0.2934	0.3162	0.2735	58.88	0.444	0.467
evm.model.scaffold_375.236	0.4511	0.2085	0.3333	0.2326	50.65	0.354	0.445
evm.model.scaffold_375.578	0.3589	0.2546	0.2356	0.3238	50.72	0.487	0.542
evm.model.scaffold_375.726	0.2702	0.3263	0.2921	0.3741	49.83	0.549	0.483
evm.model.scaffold_375.586	0.4228	0.2067	0.3128	0.2791	52.17	0.388	0.464
evm.model.scaffold_375.497	0.4664	0.2422	0.3411	0.2218	52.03	0.357	0.44
evm.model.scaffold_375.439	0.3818	0.2909	0.305	0.2031	45.68	0.411	0.471
evm.model.scaffold_375.456	0.4448	0.2238	0.3569	0.2321	49.89	0.35	0.417
evm.model.scaffold_375.190	0.4364	0.2485	0.2317	0.3567	59.53	0.469	0.48
evm.model.scaffold_375.157	0.4384	0.1644	0.3854	0.3656	61	0.4	0.407
evm.model.scaffold_375.27	0.4839	0.2097	0.2789	0.2727	54.55	0.378	0.459
evm.model.scaffold_375.68	0.3846	0.3205	0.3101	0.2917	53.28	0.459	0.45
evm.model.scaffold_375.14	0.3153	0.3153	0.3644	0.2793	51.91	0.458	0.515
evm.model.scaffold_375.379	0.3443	0.3443	0.3325	0.2073	57.81	0.45	0.471
evm.model.scaffold_375.445	0.4257	0.207	0.3633	0.2491	52.22	0.352	0.42
evm.model.scaffold_375.154	0.4769	0.2407	0.2931	0.3073	51.04	0.41	0.429
evm.model.scaffold_375.354	0.3183	0.295	0.3742	0.264	57.3	0.439	0.441
evm.model.scaffold_375.452	0.3315	0.3029	0.3214	0.3114	54.74	0.473	0.456
evm.model.scaffold_375.459	0.4057	0.3113	0.2473	0.1705	49.8	0.421	0.494
evm.model.scaffold_375.294	0.4415	0.25	0.3041	0.3099	53.32	0.416	0.456
evm.model.scaffold_375.54	0.4212	0.2333	0.3003	0.2993	49.91	0.416	0.447
evm.model.scaffold_375.329.1	0.3937	0.2598	0.3383	0.328	51.55	0.431	0.434
evm.model.scaffold_375.412_evm.model.scaffold_375.414	0.3887	0.3145	0.2764	0.2489	55.69	0.451	0.483
evm.model.scaffold_375.549	0.4098	0.2439	0.3305	0.2716	48.81	0.397	0.451
evm.model.scaffold_375.25	0.4435	0.247	0.3063	0.25	51.88	0.387	0.453
evm.model.scaffold_375.213	0.4912	0.1696	0.29	0.2897	48.75	0.369	0.48
evm.model.scaffold_375.431	0.3827	0.2346	0.3684	0.2319	58.08	0.372	0.455
evm.model.scaffold_375.66	0.2953	0.3304	0.3009	0.354	51.19	0.524	0.463
evm.model.scaffold_375.587	0.4697	0.1831	0.3554	0.2805	51.99	0.35	0.43
evm.model.scaffold_375.663	0.4103	0.3205	0.1789	0.3587	43.94	0.542	0.503
evm.model.scaffold_375.732	0.3957	0.2494	0.3945	0.1796	50.95	0.347	0.437
evm.model.scaffold_375.658	0.4535	0.2042	0.3403	0.2597	52.33	0.358	0.432
evm.model.scaffold_375.223	0.3375	0.3746	0.2816	0.2862	55.89	0.512	0.484
evm.model.scaffold_375.612	0.2018	0.4404	0.2816	0.2871	52.26	0.602	0.556
evm.model.scaffold_375.1	0.1573	0.5225	0.1377	0.3252	46.71	0.74	0.6
evm.model.scaffold_375.713	0.381	0.2579	0.3457	0.2597	56.48	0.41	0.454
evm.model.scaffold_375.267	0.3586	0.301	0.2331	0.3208	55.27	0.503	0.518
evm.model.scaffold_375.546	0.3641	0.3917	0.2753	0.1737	48.2	0.471	0.494
evm.model.scaffold_375.475	0.1593	0.6239	0.1989	0.1943	47.95	0.709	0.539
evm.model.scaffold_375.762	0.3858	0.2651	0.365	0.2694	59.52	0.405	0.435
evm.model.scaffold_375.286	0.3182	0.3442	0.3194	0.2643	57.71	0.486	0.52
evm.model.scaffold_375.662	0.4389	0.212	0.3338	0.276	50.94	0.376	0.442
evm.model.scaffold_375.683	0.3371	0.3003	0.2692	0.3614	55.23	0.514	0.486
evm.model.scaffold_375.698	0.3656	0.2258	0.381	0.2658	61	0.389	0.447
evm.model.scaffold_375.377	0.3284	0.3358	0.3443	0.1913	61	0.438	0.464
evm.model.scaffold_375.434	0.4765	0.2282	0.329	0.2248	52.24	0.349	0.418
evm.model.scaffold_375.74.1	0.5436	0.2349	0.2508	0.2607	52.3	0.361	0.447
evm.model.scaffold_375.104	0.3728	0.2473	0.3561	0.248	59.55	0.39	0.418
evm.model.scaffold_375.78	0.4444	0.2346	0.4304	0.1364	33.27	0.286	0.36
evm.model.scaffold_375.22	0.4248	0.2451	0.2628	0.3129	57.67	0.439	0.477
evm.model.scaffold_375.647	0.4255	0.2766	0.3667	0.2805	48.35	0.402	0.411
evm.model.scaffold_375.532	0.3918	0.2749	0.4405	0.1519	53.9	0.335	0.43
evm.model.scaffold_375.226	0.4364	0.1716	0.403	0.2895	49.51	0.349	0.405
evm.model.scaffold_375.246	0.3956	0.3022	0.2953	0.3094	54.02	0.458	0.458
evm.model.scaffold_375.566	0.4599	0.2004	0.3537	0.2302	53.48	0.333	0.422
evm.model.scaffold_375.482	0.3521	0.3333	0.3086	0.2457	54.14	0.463	0.479
evm.model.scaffold_375.141	0.3863	0.2393	0.3852	0.2269	52.32	0.37	0.434
evm.model.scaffold_375.397	0.4059	0.2487	0.3207	0.2598	55.1	0.401	0.462
evm.model.scaffold_375.151	0.4545	0.303	0.2706	0.3333	48.95	0.475	0.48
evm.model.scaffold_375.450	0.2649	0.3568	0.2738	0.3487	52.79	0.556	0.517
evm.model.scaffold_375.505	0.3154	0.3	0.3923	0.254	49.09	0.436	0.48
evm.model.scaffold_375.615	0.2186	0.3765	0.2198	0.4	49.57	0.633	0.569
evm.model.scaffold_375.761	0.5	0	0.0367	0.6177	26.73	0.582	0.551
evm.model.scaffold_375.37	0.4014	0.2449	0.3191	0.2818	55.16	0.417	0.46
evm.model.scaffold_375.59	0.3963	0.1888	0.3926	0.3278	50.33	0.392	0.437
evm.model.scaffold_375.106	0.4206	0.2222	0.3553	0.256	49.12	0.368	0.416
evm.model.scaffold_375.492	0.4263	0.3135	0.2509	0.2857	47.67	0.459	0.457
evm.model.scaffold_375.451	0.3866	0.2491	0.3713	0.2857	51.47	0.402	0.439
evm.model.scaffold_375.519	0.3933	0.3315	0.2418	0.2887	61	0.483	0.467
evm.model.scaffold_375.753	0.5076	0.1976	0.3533	0.2827	47.01	0.355	0.412
evm.model.scaffold_375.426	0.4662	0.2132	0.3018	0.262	51.92	0.372	0.454
evm.model.scaffold_375.362	0.48	0.1533	0.4173	0.2047	43.49	0.274	0.395
evm.model.scaffold_375.231	0.4524	0.2302	0.3475	0.2743	48.17	0.38	0.422
evm.model.scaffold_375.75	0.4113	0.3085	0.2206	0.251	49.5	0.463	0.472
evm.model.scaffold_375.308	0.4938	0.2125	0.3889	0.2391	48.48	0.332	0.415
evm.model.scaffold_375.730	0.3939	0.2273	0.475	0.2368	60	0.34	0.412
evm.model.scaffold_375.613	0.1808	0.5198	0.1472	0.3121	47.12	0.716	0.615
evm.model.scaffold_375.680	0.4484	0.2063	0.3664	0.1585	48.57	0.307	0.477
evm.model.scaffold_375.159	0.3772	0.2895	0.3	0.3261	53.78	0.463	0.458
evm.model.scaffold_375.707	0.2574	0.3515	0.2751	0.2849	58.34	0.54	0.552
evm.model.scaffold_375.180	0.4085	0.2465	0.3223	0.2301	48.99	0.386	0.451
evm.model.scaffold_375.514	0.4577	0.1962	0.3333	0.3231	49.91	0.392	0.446
evm.model.scaffold_375.416	0.377	0.377	0.3434	0.1395	52.57	0.42	0.435
evm.model.scaffold_375.531.1	0.4188	0.2656	0.2465	0.3142	57.99	0.45	0.48
evm.model.scaffold_375.322	0.4021	0.4048	0.1576	0.2736	47.48	0.538	0.514
evm.model.scaffold_375.43	0.3929	0.2403	0.3435	0.2593	55.82	0.393	0.457
evm.model.scaffold_375.437	0.489	0.2004	0.3378	0.2136	54.27	0.322	0.433
evm.model.scaffold_375.561	0.242	0.465	0.1679	0.3374	53.51	0.656	0.556
evm.model.scaffold_375.690	0.37	0.2733	0.3824	0.1892	51.25	0.374	0.415
evm.model.scaffold_375.522	0.4897	0.1815	0.321	0.2115	51.46	0.314	0.41
evm.model.scaffold_375.137	0.3385	0.3	0.314	0.3125	61	0.474	0.469
evm.model.scaffold_375.152	0.3109	0.2783	0.3726	0.2518	49.92	0.428	0.437
evm.model.scaffold_375.48	0.3814	0.2691	0.3486	0.3478	49.9	0.447	0.442
evm.model.scaffold_375.63	0.4549	0.2078	0.3725	0.2327	52.68	0.339	0.42
evm.model.scaffold_375.264	0.3113	0.4106	0.2294	0.3671	55.54	0.583	0.502
evm.model.scaffold_375.659	0.386	0.2544	0.3591	0.2828	50.92	0.409	0.439
evm.model.scaffold_375.756	0.392	0.3494	0.26	0.1935	50.9	0.45	0.468
evm.model.scaffold_375.654	0.1966	0.4615	0.2477	0.3398	55.59	0.64	0.534
evm.model.scaffold_375.441	0.233	0.4515	0.2137	0.3225	48.34	0.625	0.508
evm.model.scaffold_375.464	0.4214	0.2579	0.2868	0.2698	53.4	0.414	0.441
evm.model.scaffold_375.33.1	0.4315	0.2945	0.2815	0.256	54.77	0.424	0.429
evm.model.scaffold_375.778	0.3579	0.2842	0.2955	0.2619	60.4	0.45	0.485
evm.model.scaffold_375.526	0.3596	0.2622	0.3485	0.2803	55.44	0.422	0.469
evm.model.scaffold_375.18	0.3636	0.2222	0.4646	0.2093	44.4	0.328	0.379
evm.model.scaffold_375.669	0.4016	0.252	0.2743	0.3738	61	0.468	0.45
evm.model.scaffold_375.305	0.1527	0.4198	0.4063	0.1818	45.54	0.517	0.525
evm.model.scaffold_375.91	0.4701	0.2239	0.2574	0.3359	58.37	0.427	0.453
evm.model.scaffold_375.89	0.4504	0.2128	0.3416	0.2332	51.79	0.349	0.427
evm.model.scaffold_375.598	0.3658	0.249	0.3777	0.2254	57.07	0.381	0.444
evm.model.scaffold_375.593	0.521	0.2039	0.2796	0.2185	48.36	0.338	0.479
evm.model.scaffold_375.408	0.4019	0.271	0.31	0.2842	56.74	0.431	0.46
evm.model.scaffold_375.62	0.5088	0.1763	0.2997	0.2604	47.82	0.334	0.436
evm.model.scaffold_375.256	0.3191	0.4362	0.1429	0.1829	42.78	0.571	0.624
evm.model.scaffold_375.446	0.1895	0.4	0.2692	0.3235	56.55	0.607	0.587
evm.model.scaffold_375.203	0.3851	0.2464	0.2653	0.3379	54.15	0.462	0.469
evm.model.scaffold_375.577	0.3759	0.2664	0.4095	0.2009	50.63	0.369	0.431
evm.model.scaffold_375.494	0.4211	0.2474	0.3647	0.2215	47.08	0.366	0.433
evm.model.scaffold_375.500	0.359	0.3385	0.2935	0.231	53.52	0.463	0.486
evm.model.scaffold_375.685	0.292	0.3212	0.2672	0.375	55.45	0.539	0.482
evm.model.scaffold_375.622	0.3497	0.2393	0.2065	0.4122	47.6	0.529	0.502
evm.model.scaffold_375.81	0.4261	0.3565	0.2719	0.1481	48.59	0.416	0.462
evm.model.scaffold_375.199	0.2927	0.3171	0.1182	0.5481	40.63	0.692	0.499
evm.model.scaffold_375.259_evm.model.scaffold_375.260	0.483	0.1703	0.418	0.2176	47.23	0.297	0.413
evm.model.scaffold_375.324	0.3539	0.2809	0.3353	0.2733	49.77	0.439	0.455
evm.model.scaffold_375.614	0.5574	0.1557	0.3583	0.2522	50.41	0.302	0.44
evm.model.scaffold_375.727	0.2947	0.3961	0.25	0.3237	53.19	0.559	0.481
evm.model.scaffold_375.554	0.4526	0.1825	0.234	0.3309	55.89	0.424	0.478
evm.model.scaffold_375.178	0.3673	0.1837	0.4611	0.2645	47.61	0.341	0.401
evm.model.scaffold_375.368	0.2651	0.3631	0.3168	0.2918	55.1	0.525	0.475
evm.model.scaffold_375.576	0.45	0.23	0.3571	0.2143	57.17	0.346	0.427
evm.model.scaffold_375.627	0.407	0.2663	0.4486	0.2079	53.1	0.354	0.404
evm.model.scaffold_375.700	0.3333	0.3133	0.3463	0.2207	53.14	0.438	0.486
evm.model.scaffold_375.302	0.4434	0.1538	0.3981	0.2593	48.46	0.313	0.411
evm.model.scaffold_375.569	0.4569	0.2241	0.2843	0.2766	57.47	0.388	0.448
evm.model.scaffold_375.661	0.379	0.2293	0.3525	0.2374	55.58	0.38	0.434
evm.model.scaffold_375.36	0.3924	0.2911	0.3649	0.2083	60.93	0.396	0.472
evm.model.scaffold_375.133	0.4432	0.2159	0.4253	0.2692	55.84	0.345	0.381
evm.model.scaffold_375.110	0.4707	0.1976	0.3416	0.2876	49.95	0.365	0.416
evm.model.scaffold_375.35	0.4322	0.1907	0.3686	0.2655	55.93	0.357	0.457
evm.model.scaffold_375.52	0.3699	0.2602	0.316	0.2857	54.12	0.431	0.451
evm.model.scaffold_375.617	0.3293	0.2874	0.2444	0.3943	60.92	0.542	0.527
evm.model.scaffold_375.610	0.3991	0.2685	0.2292	0.3296	52.05	0.474	0.46
evm.model.scaffold_375.743	0.4096	0.2222	0.3304	0.2813	50.82	0.394	0.451
evm.model.scaffold_375.677	0.469	0.2171	0.3193	0.2217	48.96	0.348	0.424
evm.model.scaffold_375.57	0.4022	0.2479	0.3324	0.2878	53.79	0.417	0.468
evm.model.scaffold_375.306	0.4136	0.2324	0.3226	0.2044	52.82	0.361	0.448
evm.model.scaffold_375.640	0.4013	0.2341	0.3488	0.3142	53.06	0.411	0.431
evm.model.scaffold_375.254	0.2404	0.3678	0.2356	0.407	51.62	0.61	0.537
evm.model.scaffold_375.596	0.3563	0.2069	0.3717	0.3242	49.98	0.415	0.445
evm.model.scaffold_375.574	0.3179	0.3197	0.3997	0.2148	53.28	0.42	0.451
evm.model.scaffold_375.230	0.4533	0.2907	0.2629	0.2119	49.82	0.404	0.474
evm.model.scaffold_375.242	0.473	0.2531	0.3163	0.2111	51.89	0.361	0.422
evm.model.scaffold_375.353	0.3427	0.3287	0.336	0.2299	55.64	0.447	0.453
evm.model.scaffold_375.701	0.4523	0.2616	0.3276	0.1851	49.47	0.354	0.423
evm.model.scaffold_375.605	0.4231	0.2727	0.2437	0.25	53.72	0.424	0.459
evm.model.scaffold_375.418	0.44	0.18	0.4672	0.2146	47.67	0.291	0.379
evm.model.scaffold_375.345	0.5128	0.1709	0.4273	0.1818	47.4	0.262	0.358
evm.model.scaffold_375.589	0.3892	0.2162	0.2722	0.2941	51.21	0.427	0.535
evm.model.scaffold_375.429	0.3743	0.2291	0.3436	0.3405	46.44	0.437	0.439
evm.model.scaffold_375.71	0.3085	0.1915	0.36	0.3299	50.2	0.435	0.491
evm.model.scaffold_375.682	0.4532	0.1694	0.3104	0.3212	47.64	0.383	0.478
evm.model.scaffold_375.678	0.4328	0.209	0.3735	0.2625	52.04	0.36	0.411
evm.model.scaffold_375.584	0.3899	0.3145	0.2932	0.2341	55.29	0.44	0.477
evm.model.scaffold_375.750	0.4109	0.2084	0.3312	0.2875	52.28	0.386	0.427
evm.model.scaffold_375.757	0.4755	0.1493	0.3489	0.2387	48.98	0.312	0.446
evm.model.scaffold_375.635	0.4412	0.1569	0.3333	0.3629	51.74	0.409	0.435
evm.model.scaffold_375.238	0.4303	0.2351	0.3347	0.3174	52.81	0.407	0.43
evm.model.scaffold_375.729.2	0.3584	0.2611	0.3772	0.283	53.32	0.416	0.435
evm.model.scaffold_375.321	0.3896	0.2623	0.2507	0.3353	54.1	0.474	0.483
evm.model.scaffold_375.378	0.3516	0.2967	0.3	0.28	60.46	0.462	0.489
evm.model.scaffold_375.275	0.3542	0.25	0.4392	0.2174	52.55	0.363	0.443
evm.model.scaffold_375.537	0.1967	0.5377	0.2115	0.3	49.28	0.676	0.549
evm.model.scaffold_375.112	0.4083	0.2583	0.4381	0.2353	50.88	0.367	0.431
evm.model.scaffold_375.543	0.5185	0.1481	0.4037	0.1683	45.67	0.248	0.36
evm.model.scaffold_375.271	0.3943	0.2902	0.2648	0.2992	55.21	0.46	0.477
evm.model.scaffold_375.80	0.3019	0.4434	0.2907	0.2105	61	0.525	0.466
evm.model.scaffold_375.167	0.5	0.2303	0.2822	0.2378	51.85	0.357	0.435
evm.model.scaffold_375.498	0.4475	0.1759	0.384	0.3281	49.17	0.379	0.401
evm.model.scaffold_375.421	0.3636	0.2527	0.3988	0.2511	54.94	0.389	0.428
evm.model.scaffold_375.227	0.4225	0.243	0.3333	0.2094	55.76	0.365	0.454
evm.model.scaffold_375.674.1	0.3904	0.2356	0.4281	0.2478	52.42	0.362	0.417
evm.model.scaffold_375.742	0.4589	0.1983	0.3535	0.3067	52.81	0.373	0.412
evm.model.scaffold_375.736	0.3825	0.2397	0.3764	0.2427	51.37	0.381	0.439
evm.model.scaffold_375.136	0.3456	0.2574	0.2	0.44	58.82	0.549	0.473
evm.model.scaffold_375.235	0.425	0.1688	0.363	0.2385	55.41	0.331	0.472
evm.model.scaffold_375.109	0.3204	0.2541	0.3296	0.2754	55.38	0.44	0.483
evm.model.scaffold_375.373	0.4167	0.2113	0.3799	0.2598	54.77	0.359	0.414
evm.model.scaffold_375.161	0.3454	0.299	0.1944	0.4433	53.81	0.576	0.491
evm.model.scaffold_375.194	0.4335	0.2167	0.3777	0.1705	52.32	0.318	0.439
evm.model.scaffold_375.350	0.4286	0.1571	0.5333	0.1368	40.26	0.224	0.361
evm.model.scaffold_375.411	0.337	0.3768	0.3293	0.1806	50.42	0.455	0.483
evm.model.scaffold_375.140	0.2993	0.5	0.2208	0.3165	50.99	0.609	0.514
evm.model.scaffold_375.328	0.449	0.2313	0.4286	0.2413	47.38	0.346	0.415
evm.model.scaffold_375.723	0.4824	0.1627	0.3555	0.2863	48.89	0.341	0.427
evm.model.scaffold_375.383	0.1949	0.5231	0.1	0.4247	45.09	0.752	0.563
evm.model.scaffold_375.218	0.5082	0.1446	0.364	0.2272	46.48	0.291	0.429
evm.model.scaffold_375.281	0.3788	0.2389	0.2216	0.3084	53.32	0.471	0.517
evm.model.scaffold_375.175	0.4098	0.2262	0.3558	0.2953	52.38	0.399	0.433
evm.model.scaffold_375.163	0.4197	0.2791	0.3243	0.239	56.35	0.402	0.448
evm.model.scaffold_375.641	0.3553	0.2544	0.385	0.2529	52.86	0.398	0.437
evm.model.scaffold_375.454	0.4513	0.2124	0.3399	0.2646	50.53	0.364	0.422
evm.model.scaffold_375.541	0.3834	0.3642	0.22	0.2232	56.71	0.487	0.505
evm.model.scaffold_375.405	0.3068	0.3386	0.3915	0.2753	56.03	0.462	0.475
evm.model.scaffold_375.204	0.319	0.319	0.4197	0.2197	47.18	0.419	0.444
[truncated: 25,942 more rows]

## Sheet: Chloroplast Genome
	Indicators
gene	T3s	C3s	A3s	G3s	Nc	GC3s	GC
NC_036961.1_cds_YP_009460147.1_1	0.2022	0.3258	0.3636	0.3625	54.34	0.537	0.473
NC_036961.1_cds_YP_009460148.1_2	0.2979	0.2092	0.3095	0.359	58.21	0.469	0.432
NC_036961.1_cds_YP_009460149.1_3	0.5225	0.1655	0.4101	0.215	49.51	0.27	0.315
NC_036961.1_cds_YP_009460150.1_4	0.3315	0.2965	0.3562	0.2518	52.84	0.441	0.457
NC_036961.1_cds_YP_009460151.1_5	0.2356	0.2779	0.3304	0.4395	53.03	0.546	0.438
NC_036961.1_cds_YP_009460152.1_6	0.4286	0.2959	0.3714	0.2353	51.14	0.398	0.411
NC_036961.1_cds_YP_009460153.1_7	0.505	0.1089	0.4483	0.1408	44.88	0.189	0.35
NC_036961.1_cds_YP_009460154.1_8	0.4722	0.1667	0.4487	0.1408	47.67	0.244	0.393
NC_036961.1_cds_YP_009460155.1_9	0.4919	0.1452	0.4821	0.1531	48.08	0.223	0.382
NC_036961.1_cds_YP_009460156.1_10	0.4935	0.1494	0.4573	0.1533	45.4	0.234	0.375
NC_036961.1_cds_YP_009460157.1_11	0.4962	0.1654	0.4407	0.2059	51.5	0.267	0.389
NC_036961.1_cds_YP_009460158.1_12	0.3892	0.2816	0.3355	0.2403	52.83	0.41	0.435
NC_036961.1_cds_YP_009460159.1_13	0.3806	0.285	0.3474	0.2279	48.81	0.407	0.42
NC_036961.1_cds_YP_009460160.1_14	0.4079	0.0658	0.5366	0.2078	39.85	0.219	0.39
NC_036961.1_cds_YP_009460162.1_16	0.3343	0.2472	0.241	0.396	57.24	0.511	0.458
NC_036961.1_cds_YP_009460163.1_17	0.3659	0.2391	0.2336	0.3973	58.7	0.495	0.435
NC_036961.1_cds_YP_009460166.1_20	0.4524	0.1363	0.4547	0.2193	49.33	0.265	0.386
NC_036961.1_cds_YP_009460167.1_21	0.2884	0.3011	0.3981	0.3571	54.65	0.469	0.384
NC_036961.1_cds_YP_009460168.1_22	0.4157	0.2415	0.4507	0.2284	49.9	0.341	0.353
NC_036961.1_cds_YP_009460169.1_23	0.4895	0.1632	0.4425	0.1611	46.71	0.244	0.366
NC_036961.1_cds_YP_009460170.1_24	0.4764	0.1651	0.4352	0.1131	42.3	0.226	0.362
NC_036961.1_cds_YP_009460172.1_26	0.4167	0.1806	0.4435	0.2735	47.71	0.335	0.379
NC_036961.1_cds_YP_009460173.1_27	0.2563	0.2646	0.3294	0.4419	59.3	0.533	0.431
NC_036961.1_cds_YP_009460176.1_30	0.4052	0.2303	0.4643	0.2441	51.88	0.344	0.363
NC_036961.1_cds_YP_009460178.1_32	0.396	0.2349	0.3643	0.2672	52.85	0.384	0.385
NC_036961.1_cds_YP_009460179.1_33	0.3714	0.2457	0.4027	0.246	59.59	0.372	0.345
NC_036961.1_cds_YP_009460180.1_34	0.5039	0.1484	0.3682	0.2325	47	0.289	0.401
NC_036961.1_cds_YP_009460189.1_43	0.5128	0.1154	0.4318	0.1795	37.66	0.228	0.34
NC_036961.1_cds_YP_009460190.1_44	0.2588	0.2471	0.5581	0.2254	36.26	0.346	0.343
NC_036961.1_cds_YP_009460191.1_45	0.2022	0.3258	0.3636	0.3625	54.34	0.537	0.473
NC_036961.1_cds_YP_009460192.1_46	0.2482	0.2993	0.3175	0.487	51.98	0.567	0.433
NC_036961.1_cds_YP_009460193.1_47	0.4966	0.1632	0.3683	0.1652	49.03	0.266	0.441
NC_036961.1_cds_YP_009460197.1_51	0.4368	0.2684	0.252	0.2844	47.69	0.418	0.408
NC_036961.1_cds_YP_009460198.1_52	0.4737	0.3158	0.2079	0.1744	38.92	0.404	0.392
NC_036961.1_cds_YP_009460199.1_53	0.2926	0.2664	0.4783	0.3125	51.16	0.411	0.344
NC_036961.1_cds_YP_009460200.1_54	0.172	0.3118	0.4343	0.3723	46.55	0.52	0.458
NC_036961.1_cds_YP_009460202.1_56	0.4242	0.2222	0.411	0.3623	52.45	0.395	0.363
NC_036961.1_cds_YP_009460203.1_57	0.2222	0.2469	0.3875	0.4507	52.33	0.515	0.412
NC_036961.1_cds_YP_009460204.1_58	0.3182	0.3	0.2473	0.4096	59.33	0.536	0.457
NC_036961.1_cds_YP_009460205.1_59	0.4151	0.2138	0.4748	0.2422	36.5	0.33	0.34
NC_036961.1_cds_YP_009460207.1_61	0.3077	0.2821	0.3693	0.3478	58.87	0.47	0.459
NC_036961.1_cds_YP_009460209.1_63	0.4139	0.2401	0.4242	0.2024	50.3	0.335	0.387
NC_036961.1_cds_YP_009460210.1_64	0.4296	0.2113	0.4192	0.1355	49.36	0.282	0.377
NC_036961.1_cds_YP_009460211.1_65	0.3016	0.3016	0.3874	0.28	38.68	0.449	0.416
NC_036961.1_cds_YP_009460212.1_66	0.3667	0.275	0.3056	0.2857	50.98	0.442	0.498
NC_036961.1_cds_YP_009460214.1_68	0.5419	0.118	0.4368	0.1438	42.76	0.195	0.309
NC_036961.1_cds_YP_009460216.1_70	0.5021	0.1362	0.4249	0.2256	47.07	0.257	0.325
NC_036961.1_cds_YP_009460217.1_71	0.4203	0.1755	0.4496	0.1595	46.33	0.263	0.355
NC_036961.1_cds_YP_009460219.1_73	0.5513	0.2564	0.3333	0.2222	42.69	0.333	0.341
NC_036961.1_cds_YP_009460220.1_74	0.4906	0.1195	0.4222	0.1429	44.13	0.206	0.347
NC_036961.1_cds_YP_009460221.1_75	0.5294	0.1397	0.4909	0.1413	47.31	0.203	0.339
NC_036961.1_cds_YP_009460222.1_76	0.4669	0.1104	0.4825	0.127	43.34	0.188	0.332
NC_036961.1_cds_YP_009460223.1_77	0.482	0.1148	0.5052	0.1619	49.12	0.204	0.375
NC_036961.1_cds_YP_009460225.1_79	0.3684	0.2195	0.5322	0.2392	51.63	0.318	0.301
NC_036961.1_cds_YP_009460227.1_81	0.3101	0.3023	0.3305	0.2963	58.94	0.473	0.484
NC_036961.1_cds_YP_009460228.1_82	0.4167	0.1417	0.5271	0.1186	46.53	0.208	0.406
NC_036961.1_cds_YP_009460229.1_83	0.4296	0.2113	0.4192	0.1355	49.36	0.282	0.377
NC_036961.1_cds_YP_009460230.1_84	0.3454	0.2624	0.4025	0.2685	53.89	0.396	0.384
NC_036961.1_cds_YP_009460232.1_86	0.1989	0.2742	0.4264	0.3672	57.96	0.489	0.453
NC_044117.1_cds_YP_009680943.1_1	0.2022	0.3258	0.3636	0.3625	54.34	0.537	0.473
NC_044117.1_cds_YP_009680944.1_2	0.3025	0.2064	0.312	0.3578	56.8	0.464	0.429
NC_044117.1_cds_YP_009680945.1_3	0.5296	0.1631	0.4131	0.2079	49.41	0.263	0.315
NC_044117.1_cds_YP_009680946.1_4	0.3315	0.2992	0.3515	0.2473	52.03	0.442	0.46
NC_044117.1_cds_YP_009680947.1_5	0.2364	0.2788	0.3324	0.4381	53.05	0.545	0.437
NC_044117.1_cds_YP_009680948.1_6	0.4242	0.303	0.3676	0.2424	50.77	0.407	0.417
NC_044117.1_cds_YP_009680949.1_7	0.505	0.1089	0.4483	0.1408	44.12	0.189	0.347
NC_044117.1_cds_YP_009680950.1_8	0.4833	0.1667	0.4359	0.1408	48.84	0.244	0.391
NC_044117.1_cds_YP_009680951.1_9	0.4919	0.1532	0.4643	0.1633	49.08	0.236	0.386
NC_044117.1_cds_YP_009680952.1_10	0.487	0.1494	0.4634	0.1533	46.19	0.234	0.375
NC_044117.1_cds_YP_009680953.1_11	0.4962	0.1654	0.4492	0.1961	50.23	0.261	0.387
NC_044117.1_cds_YP_009680954.1_12	0.3899	0.2821	0.3355	0.2373	52.92	0.409	0.436
NC_044117.1_cds_YP_009680955.1_13	0.3799	0.2845	0.3474	0.2304	48.71	0.408	0.421
NC_044117.1_cds_YP_009680956.1_14	0.4156	0.0649	0.5185	0.2237	40.91	0.229	0.39
NC_044117.1_cds_YP_009680958.1_16	0.3371	0.2493	0.2378	0.4	57.73	0.514	0.456
NC_044117.1_cds_YP_009680959.1_17	0.3646	0.2383	0.2346	0.3991	57.79	0.495	0.434
NC_044117.1_cds_YP_009680962.1_20	0.4536	0.1351	0.4534	0.2207	49.28	0.265	0.386
NC_044117.1_cds_YP_009680963.1_21	0.3894	0.2055	0.4202	0.2571	52.11	0.351	0.384
NC_044117.1_cds_YP_009680964.1_22	0.4687	0.1521	0.4826	0.1759	47.08	0.241	0.343
NC_044117.1_cds_YP_009680965.1_23	0.4895	0.1632	0.4483	0.1544	46.34	0.24	0.364
NC_044117.1_cds_YP_009680966.1_24	0.3622	0.2595	0.3529	0.3358	58.48	0.437	0.372
NC_044117.1_cds_YP_009680968.1_26	0.4452	0.1575	0.4643	0.2302	48.98	0.286	0.369
NC_044117.1_cds_YP_009680969.1_27	0.2563	0.2646	0.3294	0.4419	59.3	0.533	0.431
NC_044117.1_cds_YP_009680972.1_30	0.413	0.233	0.4582	0.248	52.18	0.346	0.364
NC_044117.1_cds_YP_009680974.1_32	0.4054	0.2365	0.3516	0.2696	52.81	0.386	0.39
NC_044117.1_cds_YP_009680975.1_33	0.4863	0.2077	0.4317	0.1721	52.73	0.284	0.344
NC_044117.1_cds_YP_009680976.1_34	0.5136	0.144	0.3541	0.2423	47.57	0.292	0.402
NC_044117.1_cds_YP_009680985.1_43	0.5128	0.1154	0.4318	0.1795	37.66	0.228	0.34
NC_044117.1_cds_YP_009680986.1_44	0.2558	0.2674	0.5595	0.2174	36.13	0.355	0.346
NC_044117.1_cds_YP_009680987.1_45	0.2022	0.3258	0.3636	0.3625	54.34	0.537	0.473
NC_044117.1_cds_YP_009680988.1_46	0.25	0.3015	0.3228	0.4828	53.04	0.564	0.429
NC_044117.1_cds_YP_009680989.1_47	0.3786	0.269	0.2875	0.3134	56.42	0.448	0.451
NC_044117.1_cds_YP_009680993.1_51	0.4368	0.2684	0.252	0.2844	47.45	0.418	0.408
NC_044117.1_cds_YP_009680994.1_52	0.4737	0.3158	0.22	0.1765	39.64	0.401	0.39
NC_044117.1_cds_YP_009680995.1_53	0.2952	0.2687	0.4709	0.3182	50.84	0.416	0.348
NC_044117.1_cds_YP_009680996.1_54	0.172	0.3118	0.4343	0.3723	43.47	0.52	0.455
NC_044117.1_cds_YP_009680998.1_56	0.4242	0.2222	0.411	0.3623	53.92	0.395	0.363
NC_044117.1_cds_YP_009680999.1_57	0.2222	0.2469	0.3875	0.4571	51.44	0.515	0.409
NC_044117.1_cds_YP_009681000.1_58	0.3119	0.3028	0.2473	0.4096	54.15	0.54	0.46
NC_044117.1_cds_YP_009681001.1_59	0.4188	0.2125	0.4748	0.2344	36.04	0.325	0.338
NC_044117.1_cds_YP_009681003.1_61	0.3096	0.2843	0.3652	0.3436	59.14	0.471	0.461
NC_044117.1_cds_YP_009681005.1_63	0.4487	0.2025	0.3981	0.266	52.44	0.339	0.374
NC_044117.1_cds_YP_009681006.1_64	0.4296	0.2113	0.4192	0.1355	49.36	0.282	0.377
NC_044117.1_cds_YP_009681007.1_65	0.3016	0.3016	0.3874	0.28	38.68	0.449	0.416
NC_044117.1_cds_YP_009681009.1_67	0.4191	0.2132	0.4057	0.2333	61	0.333	0.348
NC_044117.1_cds_YP_009681010.1_68	0.4366	0.183	0.4246	0.2742	56.35	0.32	0.321
NC_044117.1_cds_YP_009681012.1_70	0.4958	0.1441	0.4175	0.2303	47.61	0.267	0.33
NC_044117.1_cds_YP_009681013.1_71	0.4263	0.1728	0.4411	0.1667	47.09	0.265	0.355
NC_044117.1_cds_YP_009681015.1_73	0.3289	0.1842	0.4154	0.3889	44.52	0.402	0.341
NC_044117.1_cds_YP_009681016.1_74	0.3906	0.25	0.3505	0.3571	61	0.425	0.361
NC_044117.1_cds_YP_009681017.1_75	0.3667	0.25	0.3805	0.3191	54.52	0.408	0.344
NC_044117.1_cds_YP_009681018.1_76	0.4173	0.2014	0.3773	0.359	58.43	0.388	0.349
NC_044117.1_cds_YP_009681019.1_77	0.2992	0.2841	0.3661	0.3945	56.7	0.483	0.387
NC_044117.1_cds_YP_009681021.1_79	0.4857	0.1518	0.5531	0.1748	47.3	0.226	0.289
NC_044117.1_cds_YP_009681023.1_81	0.4167	0.1417	0.5271	0.1186	46.53	0.208	0.406
NC_044117.1_cds_YP_009681024.1_82	0.4757	0.2767	0.3263	0.1875	49.64	0.359	0.381
NC_044117.1_cds_YP_009681025.1_83	0.4487	0.2025	0.3981	0.266	52.44	0.339	0.374
NC_044117.1_cds_YP_009681027.1_85	0.1968	0.2713	0.4271	0.3687	57.94	0.49	0.455
NC_049007.1_cds_YP_009863380.1_1	0.3021	0.3125	0.358	0.3158	61	0.482	0.466
NC_049007.1_cds_YP_009863381.1_2	0.2979	0.2092	0.3095	0.359	57.99	0.469	0.433
NC_049007.1_cds_YP_009863382.1_3	0.5225	0.1655	0.4101	0.215	49.51	0.27	0.315
NC_049007.1_cds_YP_009863383.1_4	0.3315	0.2965	0.3562	0.2518	52.67	0.441	0.457
NC_049007.1_cds_YP_009863384.1_5	0.2356	0.2779	0.3284	0.4409	52.96	0.548	0.438
NC_049007.1_cds_YP_009863385.1_6	0.4286	0.2959	0.3714	0.2353	51.14	0.398	0.411
NC_049007.1_cds_YP_009863386.1_7	0.505	0.1089	0.4483	0.1408	44.88	0.189	0.35
NC_049007.1_cds_YP_009863387.1_8	0.4722	0.1667	0.4487	0.1408	47.67	0.244	0.393
NC_049007.1_cds_YP_009863388.1_9	0.4919	0.1452	0.4821	0.1531	48.08	0.223	0.382
NC_049007.1_cds_YP_009863389.1_10	0.4935	0.1494	0.4573	0.1533	45.4	0.234	0.375
NC_049007.1_cds_YP_009863390.1_11	0.4962	0.1654	0.4407	0.2059	51.5	0.267	0.389
NC_049007.1_cds_YP_009863391.1_12	0.3892	0.2816	0.3355	0.2403	52.76	0.41	0.435
NC_049007.1_cds_YP_009863392.1_13	0.3806	0.285	0.3474	0.2279	48.81	0.407	0.42
NC_049007.1_cds_YP_009863393.1_14	0.4079	0.0658	0.5366	0.2078	39.85	0.219	0.39
NC_049007.1_cds_YP_009863395.1_16	0.3343	0.25	0.2387	0.3974	57.2	0.514	0.458
NC_049007.1_cds_YP_009863396.1_17	0.3659	0.2391	0.2336	0.3973	58.7	0.495	0.435
NC_049007.1_cds_YP_009863399.1_20	0.4524	0.1363	0.4547	0.2193	49.33	0.265	0.386
NC_049007.1_cds_YP_009863400.1_21	0.3879	0.2109	0.4104	0.2594	53.63	0.357	0.388
NC_049007.1_cds_YP_009863401.1_22	0.3333	0.2583	0.4489	0.3007	54.69	0.397	0.36
NC_049007.1_cds_YP_009863402.1_23	0.4895	0.1632	0.4425	0.1611	46.71	0.244	0.366
NC_049007.1_cds_YP_009863403.1_24	0.4764	0.1651	0.4352	0.1124	42.23	0.226	0.363
NC_049007.1_cds_YP_009863405.1_26	0.4167	0.1806	0.4516	0.265	45.62	0.329	0.377
NC_049007.1_cds_YP_009863406.1_27	0.2563	0.2646	0.3294	0.4419	59.3	0.533	0.431
NC_049007.1_cds_YP_009863410.1_31	0.4052	0.2303	0.4643	0.2441	51.88	0.344	0.362
NC_049007.1_cds_YP_009863412.1_33	0.396	0.2349	0.3643	0.2672	52.85	0.384	0.385
NC_049007.1_cds_YP_009863413.1_34	0.4863	0.2077	0.4317	0.1736	53.33	0.284	0.343
NC_049007.1_cds_YP_009863414.1_35	0.5039	0.1484	0.3721	0.2281	47	0.286	0.4
NC_049007.1_cds_YP_009863423.1_44	0.5128	0.1154	0.4318	0.1795	37.66	0.228	0.34
NC_049007.1_cds_YP_009863424.1_45	0.2588	0.2471	0.5581	0.2254	36.26	0.346	0.343
NC_049007.1_cds_YP_009863425.1_46	0.3021	0.3125	0.358	0.3158	61	0.482	0.466
NC_049007.1_cds_YP_009863426.1_47	0.2518	0.295	0.3228	0.4828	51.6	0.561	0.43
NC_049007.1_cds_YP_009863427.1_48	0.4966	0.1632	0.3683	0.1652	49.03	0.266	0.441
NC_049007.1_cds_YP_009863431.1_52	0.4368	0.2684	0.252	0.2844	47.69	0.418	0.408
NC_049007.1_cds_YP_009863432.1_53	0.4737	0.3158	0.2079	0.1744	38.92	0.404	0.392
NC_049007.1_cds_YP_009863433.1_54	0.2926	0.2664	0.4783	0.3125	51.16	0.411	0.344
NC_049007.1_cds_YP_009863434.1_55	0.172	0.3118	0.4343	0.3723	46.55	0.52	0.458
NC_049007.1_cds_YP_009863436.1_57	0.4242	0.2222	0.411	0.3623	52.45	0.395	0.363
NC_049007.1_cds_YP_009863437.1_58	0.2222	0.2469	0.3875	0.4507	52.33	0.515	0.412
NC_049007.1_cds_YP_009863438.1_59	0.2258	0.3118	0.4839	0.3448	58.65	0.472	0.451
NC_049007.1_cds_YP_009863439.1_60	0.4151	0.2138	0.4748	0.2422	36.5	0.33	0.34
NC_049007.1_cds_YP_009863441.1_62	0.3077	0.2821	0.3714	0.3438	59.29	0.468	0.459
NC_049007.1_cds_YP_009863443.1_64	0.4466	0.2032	0.3986	0.2664	52.54	0.34	0.375
NC_049007.1_cds_YP_009863444.1_65	0.4296	0.2113	0.4192	0.1355	49.36	0.282	0.377
NC_049007.1_cds_YP_009863445.1_66	0.3016	0.3016	0.3874	0.28	38.68	0.449	0.416
NC_049007.1_cds_YP_009863446.1_67	0.5416	0.1177	0.4365	0.1445	42.79	0.195	0.31
NC_049007.1_cds_YP_009863448.1_69	0.5043	0.1368	0.4227	0.2242	46.28	0.257	0.325
NC_049007.1_cds_YP_009863449.1_70	0.4226	0.1755	0.4508	0.1567	46.25	0.261	0.354
NC_049007.1_cds_YP_009863451.1_72	0.5513	0.2564	0.3333	0.2222	42.69	0.333	0.341
NC_049007.1_cds_YP_009863452.1_73	0.4906	0.1195	0.4222	0.1429	44.13	0.206	0.347
NC_049007.1_cds_YP_009863453.1_74	0.5294	0.1397	0.4909	0.1413	47.31	0.203	0.339
NC_049007.1_cds_YP_009863454.1_75	0.4669	0.1104	0.486	0.123	43.36	0.185	0.332
NC_049007.1_cds_YP_009863455.1_76	0.482	0.1148	0.5052	0.1619	49.12	0.204	0.375
NC_049007.1_cds_YP_009863457.1_78	0.3678	0.22	0.5326	0.2379	51.67	0.318	0.301
NC_049007.1_cds_YP_009863458.1_79	0.4167	0.1417	0.5271	0.1186	46.53	0.208	0.406
NC_049007.1_cds_YP_009863459.1_80	0.4296	0.2113	0.4192	0.1355	49.36	0.282	0.377
NC_049007.1_cds_YP_009863460.1_81	0.3454	0.2624	0.4025	0.2685	53.89	0.396	0.384
NC_049007.1_cds_YP_009863462.1_83	0.2	0.2757	0.4286	0.3636	58.29	0.487	0.452
NC_049008.1_cds_YP_009863463.1_1	0.3021	0.3125	0.358	0.3158	61	0.482	0.466
NC_049008.1_cds_YP_009863464.1_2	0.2979	0.2092	0.3095	0.359	58.21	0.469	0.432
NC_049008.1_cds_YP_009863465.1_3	0.5225	0.1655	0.4101	0.215	49.51	0.27	0.315
NC_049008.1_cds_YP_009863466.1_4	0.3315	0.2965	0.3562	0.2518	52.84	0.441	0.457
NC_049008.1_cds_YP_009863467.1_5	0.2356	0.2779	0.3304	0.4395	53.03	0.546	0.438
NC_049008.1_cds_YP_009863468.1_6	0.4286	0.2959	0.3714	0.2353	51.14	0.398	0.411
NC_049008.1_cds_YP_009863469.1_7	0.505	0.1089	0.4483	0.1408	44.88	0.189	0.35
NC_049008.1_cds_YP_009863470.1_8	0.4722	0.1667	0.4487	0.1408	47.67	0.244	0.393
NC_049008.1_cds_YP_009863471.1_9	0.4919	0.1452	0.4821	0.1531	48.08	0.223	0.382
NC_049008.1_cds_YP_009863472.1_10	0.4935	0.1494	0.4573	0.1533	45.4	0.234	0.375
NC_049008.1_cds_YP_009863473.1_11	0.4887	0.1654	0.4407	0.2157	51.5	0.273	0.391
NC_049008.1_cds_YP_009863474.1_12	0.3892	0.2816	0.3355	0.2403	52.83	0.41	0.435
NC_049008.1_cds_YP_009863475.1_13	0.3806	0.285	0.3474	0.2279	48.81	0.407	0.42
NC_049008.1_cds_YP_009863476.1_14	0.4079	0.0658	0.5366	0.2078	39.85	0.219	0.39
NC_049008.1_cds_YP_009863478.1_16	0.3343	0.2472	0.241	0.396	57.24	0.511	0.458
NC_049008.1_cds_YP_009863479.1_17	0.3659	0.2391	0.2336	0.3973	58.7	0.495	0.435
NC_049008.1_cds_YP_009863482.1_20	0.4524	0.1363	0.4547	0.2193	49.33	0.265	0.386
NC_049008.1_cds_YP_009863483.1_21	0.3879	0.2109	0.4104	0.2594	53.62	0.357	0.387
NC_049008.1_cds_YP_009863484.1_22	0.3333	0.2573	0.4489	0.3007	54.69	0.397	0.36
NC_049008.1_cds_YP_009863485.1_23	0.4895	0.1632	0.4425	0.1611	46.71	0.244	0.366
NC_049008.1_cds_YP_009863486.1_24	0.4764	0.1651	0.4352	0.1131	42.3	0.226	0.362
NC_049008.1_cds_YP_009863488.1_26	0.4167	0.1806	0.4435	0.2735	47.71	0.335	0.379
NC_049008.1_cds_YP_009863489.1_27	0.2563	0.2646	0.3294	0.4419	59.3	0.533	0.431
NC_049008.1_cds_YP_009863493.1_31	0.4052	0.2303	0.4643	0.2441	51.88	0.344	0.363
NC_049008.1_cds_YP_009863495.1_33	0.396	0.2349	0.3643	0.2672	52.85	0.384	0.385
NC_049008.1_cds_YP_009863496.1_34	0.4918	0.2022	0.4317	0.1736	51.45	0.279	0.341
NC_049008.1_cds_YP_009863497.1_35	0.5039	0.1484	0.3682	0.2325	47	0.289	0.401
NC_049008.1_cds_YP_009863506.1_44	0.5128	0.1154	0.4318	0.1795	37.66	0.228	0.34
NC_049008.1_cds_YP_009863507.1_45	0.2588	0.2471	0.5581	0.2254	36.26	0.346	0.343
NC_049008.1_cds_YP_009863508.1_46	0.3021	0.3125	0.358	0.3158	61	0.482	0.466
NC_049008.1_cds_YP_009863509.1_47	0.2536	0.2971	0.315	0.4828	52.16	0.564	0.432
NC_049008.1_cds_YP_009863510.1_48	0.4966	0.1632	0.3683	0.1652	49.03	0.266	0.441
NC_049008.1_cds_YP_009863514.1_52	0.4368	0.2684	0.252	0.2844	47.69	0.418	0.408
NC_049008.1_cds_YP_009863515.1_53	0.4737	0.3158	0.2079	0.1744	38.92	0.404	0.392
NC_049008.1_cds_YP_009863516.1_54	0.2926	0.2664	0.4783	0.3125	51.16	0.411	0.344
NC_049008.1_cds_YP_009863517.1_55	0.172	0.3118	0.4343	0.3723	46.55	0.52	0.458
NC_049008.1_cds_YP_009863519.1_57	0.4242	0.2222	0.411	0.3623	52.45	0.395	0.363
NC_049008.1_cds_YP_009863520.1_58	0.2222	0.2469	0.3875	0.4507	52.33	0.515	0.412
NC_049008.1_cds_YP_009863521.1_59	0.2258	0.3118	0.4839	0.3448	58.65	0.472	0.451
NC_049008.1_cds_YP_009863522.1_60	0.4151	0.2138	0.4748	0.2422	36.5	0.33	0.34
NC_049008.1_cds_YP_009863524.1_62	0.3077	0.2821	0.3714	0.3438	59.73	0.468	0.46
NC_049008.1_cds_YP_009863526.1_64	0.4466	0.2032	0.3986	0.2664	52.54	0.34	0.375
NC_049008.1_cds_YP_009863527.1_65	0.4296	0.2113	0.4192	0.1355	49.36	0.282	0.377
NC_049008.1_cds_YP_009863528.1_66	0.3016	0.3016	0.3874	0.28	38.68	0.449	0.416
NC_049008.1_cds_YP_009863529.1_67	0.5419	0.118	0.4368	0.1438	42.76	0.195	0.309
NC_049008.1_cds_YP_009863531.1_69	0.5021	0.1362	0.4249	0.2256	47.07	0.257	0.325
NC_049008.1_cds_YP_009863532.1_70	0.4203	0.1755	0.4496	0.1595	46.33	0.263	0.355
NC_049008.1_cds_YP_009863534.1_72	0.5513	0.2564	0.3333	0.2222	42.69	0.333	0.341
NC_049008.1_cds_YP_009863535.1_73	0.4906	0.1195	0.4222	0.1429	44.13	0.206	0.347
NC_049008.1_cds_YP_009863536.1_74	0.5294	0.1397	0.4909	0.1413	47.31	0.203	0.339
NC_049008.1_cds_YP_009863537.1_75	0.4669	0.1104	0.4825	0.127	43.34	0.188	0.332
NC_049008.1_cds_YP_009863538.1_76	0.482	0.1148	0.5052	0.1619	49.12	0.204	0.375
NC_049008.1_cds_YP_009863540.1_78	0.3684	0.2195	0.5322	0.2392	51.63	0.318	0.301
NC_049008.1_cds_YP_009863541.1_79	0.4167	0.1417	0.5271	0.1186	46.53	0.208	0.406
NC_049008.1_cds_YP_009863542.1_80	0.4296	0.2113	0.4192	0.1355	49.36	0.282	0.377
NC_049008.1_cds_YP_009863543.1_81	0.3454	0.2624	0.4025	0.2685	53.89	0.396	0.384
NC_049008.1_cds_YP_009863545.1_83	0.2	0.2757	0.4286	0.3636	57.78	0.487	0.451
NC_049009.1_cds_YP_009863546.1_1	0.3061	0.3163	0.3537	0.3077	61	0.482	0.469
NC_049009.1_cds_YP_009863547.1_2	0.2979	0.2092	0.3095	0.359	57.99	0.469	0.433
NC_049009.1_cds_YP_009863548.1_3	0.5119	0.1821	0.4318	0.1887	53.04	0.267	0.314
NC_049009.1_cds_YP_009863549.1_4	0.3315	0.2965	0.3562	0.2518	52.63	0.441	0.458
NC_049009.1_cds_YP_009863550.1_5	0.2356	0.2779	0.3304	0.4395	53.03	0.546	0.438
NC_049009.1_cds_YP_009863551.1_6	0.4286	0.2959	0.3714	0.2353	51.14	0.398	0.411
NC_049009.1_cds_YP_009863552.1_7	0.505	0.1089	0.4483	0.1408	44.88	0.189	0.35
NC_049009.1_cds_YP_009863553.1_8	0.4778	0.1611	0.4487	0.1408	47.58	0.239	0.391
NC_049009.1_cds_YP_009863554.1_9	0.4919	0.1452	0.4821	0.1531	48.08	0.223	0.382
NC_049009.1_cds_YP_009863555.1_10	0.4935	0.1494	0.4573	0.1533	45.4	0.234	0.375
NC_049009.1_cds_YP_009863556.1_11	0.4887	0.1654	0.4407	0.2157	51.5	0.273	0.391
NC_049009.1_cds_YP_009863557.1_12	0.3892	0.2816	0.3355	0.2397	52.89	0.41	0.435
NC_049009.1_cds_YP_009863558.1_13	0.3806	0.285	0.3474	0.2279	49.01	0.407	0.42
NC_049009.1_cds_YP_009863559.1_14	0.4156	0.0649	0.5309	0.2105	40.97	0.219	0.39
NC_049009.1_cds_YP_009863561.1_16	0.3343	0.2472	0.241	0.396	57.24	0.511	0.458
NC_049009.1_cds_YP_009863562.1_17	0.3659	0.2391	0.2336	0.3973	58.7	0.495	0.435
NC_049009.1_cds_YP_009863565.1_20	0.4524	0.1375	0.4547	0.2179	49.33	0.265	0.386
NC_049009.1_cds_YP_009863566.1_21	0.3887	0.2113	0.4114	0.2576	53.49	0.356	0.387
NC_049009.1_cds_YP_009863567.1_22	0.333	0.2581	0.4478	0.3033	54.7	0.399	0.36
NC_049009.1_cds_YP_009863568.1_23	0.4895	0.1632	0.4451	0.1622	47.16	0.244	0.364
NC_049009.1_cds_YP_009863569.1_24	0.4764	0.1651	0.4352	0.1124	42.23	0.226	0.363
NC_049009.1_cds_YP_009863571.1_26	0.4214	0.1786	0.4472	0.25	45.11	0.321	0.38
NC_049009.1_cds_YP_009863572.1_27	0.2563	0.2646	0.3294	0.4419	59.3	0.533	0.431
NC_049009.1_cds_YP_009863576.1_31	0.4052	0.2303	0.4643	0.2441	51.88	0.344	0.363
NC_049009.1_cds_YP_009863578.1_33	0.3933	0.2333	0.3692	0.265	52.55	0.382	0.383
NC_049009.1_cds_YP_009863579.1_34	0.4863	0.2077	0.4317	0.1736	53.33	0.284	0.343
NC_049009.1_cds_YP_009863580.1_35	0.5039	0.1484	0.3682	0.2325	47	0.289	0.401
NC_049009.1_cds_YP_009863589.1_44	0.5128	0.1154	0.4318	0.1795	37.66	0.228	0.34
NC_049009.1_cds_YP_009863590.1_45	0.2588	0.2471	0.5698	0.2113	36.26	0.336	0.339
NC_049009.1_cds_YP_009863591.1_46	0.3021	0.3125	0.358	0.3158	61	0.482	0.466
NC_049009.1_cds_YP_009863592.1_47	0.2518	0.295	0.3228	0.4828	51.6	0.561	0.43
NC_049009.1_cds_YP_009863593.1_48	0.4966	0.1632	0.3683	0.1652	49.03	0.266	0.441
NC_049009.1_cds_YP_009863597.1_52	0.4392	0.2698	0.2459	0.287	47.51	0.421	0.407
NC_049009.1_cds_YP_009863598.1_53	0.4737	0.3158	0.2079	0.1744	38.92	0.404	0.392
NC_049009.1_cds_YP_009863599.1_54	0.2926	0.2664	0.4783	0.3125	51.12	0.411	0.346
NC_049009.1_cds_YP_009863600.1_55	0.172	0.3118	0.4242	0.383	46.55	0.528	0.461
NC_049009.1_cds_YP_009863602.1_57	0.4242	0.2222	0.411	0.3623	52.45	0.395	0.363
NC_049009.1_cds_YP_009863603.1_58	0.2222	0.2469	0.3875	0.4507	52.87	0.515	0.409
NC_049009.1_cds_YP_009863604.1_59	0.2283	0.3152	0.4783	0.3488	60.75	0.476	0.452
NC_049009.1_cds_YP_009863605.1_60	0.4151	0.2138	0.4748	0.2422	36.5	0.33	0.34
NC_049009.1_cds_YP_009863607.1_62	0.3077	0.2821	0.3714	0.3438	59.73	0.468	0.46
NC_049009.1_cds_YP_009863609.1_64	0.4464	0.203	0.3984	0.2669	52.5	0.34	0.375
NC_049009.1_cds_YP_009863610.1_65	0.4296	0.2113	0.4192	0.1355	49.36	0.282	0.377
NC_049009.1_cds_YP_009863611.1_66	0.3016	0.3016	0.3874	0.28	38.68	0.449	0.416
NC_049009.1_cds_YP_009863612.1_67	0.5432	0.1177	0.4346	0.1448	42.77	0.195	0.311
NC_049009.1_cds_YP_009863614.1_69	0.5021	0.1404	0.4227	0.2182	46.38	0.257	0.326
NC_049009.1_cds_YP_009863615.1_70	0.4217	0.1751	0.4508	0.1605	46.36	0.263	0.353
NC_049009.1_cds_YP_009863617.1_72	0.5443	0.2532	0.3269	0.2391	46.97	0.341	0.341
NC_049009.1_cds_YP_009863618.1_73	0.4906	0.1195	0.4222	0.1429	44.13	0.206	0.347
NC_049009.1_cds_YP_009863619.1_74	0.5294	0.1397	0.4909	0.1413	47.31	0.203	0.339
NC_049009.1_cds_YP_009863620.1_75	0.4669	0.1104	0.486	0.1224	42.27	0.185	0.333
NC_049009.1_cds_YP_009863621.1_76	0.482	0.1148	0.5052	0.1626	49.3	0.204	0.374
NC_049009.1_cds_YP_009863623.1_78	0.3708	0.223	0.5317	0.233	51.55	0.316	0.3
NC_049009.1_cds_YP_009863624.1_79	0.4167	0.1417	0.5271	0.1186	46.53	0.208	0.406
NC_049009.1_cds_YP_009863625.1_80	0.4296	0.2113	0.4192	0.1355	49.36	0.282	0.377
NC_049009.1_cds_YP_009863626.1_81	0.3458	0.2627	0.4011	0.2698	53.89	0.397	0.384
NC_049009.1_cds_YP_009863628.1_83	0.1989	0.2742	0.4264	0.3672	57.96	0.489	0.453
NC_049043.1_cds_YP_009865434.1_1	0.3021	0.3125	0.358	0.3158	61	0.482	0.466
NC_049043.1_cds_YP_009865435.1_2	0.2989	0.21	0.3068	0.3605	57.39	0.47	0.435
NC_049043.1_cds_YP_009865436.1_3	0.5272	0.1631	0.4073	0.2117	49.22	0.267	0.317
NC_049043.1_cds_YP_009865437.1_4	0.3306	0.2984	0.354	0.2527	52.76	0.443	0.458
NC_049043.1_cds_YP_009865438.1_5	0.2356	0.2779	0.3324	0.4381	53.02	0.545	0.438
NC_049043.1_cds_YP_009865439.1_6	0.433	0.299	0.3768	0.2239	49.99	0.393	0.408
NC_049043.1_cds_YP_009865440.1_7	0.505	0.1089	0.4483	0.1408	44.88	0.189	0.35
NC_049043.1_cds_YP_009865441.1_8	0.4722	0.1667	0.4423	0.1479	49.44	0.249	0.393
NC_049043.1_cds_YP_009865442.1_9	0.4919	0.1452	0.4911	0.1429	48.08	0.216	0.38
NC_049043.1_cds_YP_009865443.1_10	0.4903	0.1484	0.4573	0.1533	45.65	0.234	0.375
NC_049043.1_cds_YP_009865444.1_11	0.4925	0.1716	0.437	0.2039	51.5	0.272	0.391
NC_049043.1_cds_YP_009865445.1_12	0.3892	0.2816	0.3341	0.2386	52.97	0.41	0.436
NC_049043.1_cds_YP_009865446.1_13	0.3789	0.2867	0.3489	0.2279	48.52	0.408	0.418
NC_049043.1_cds_YP_009865447.1_14	0.4156	0.0649	0.5185	0.2237	40.32	0.229	0.39
NC_049043.1_cds_YP_009865449.1_16	0.3352	0.2479	0.2387	0.396	57.24	0.512	0.459
NC_049043.1_cds_YP_009865450.1_17	0.3659	0.2391	0.2336	0.3973	58.48	0.495	0.434
NC_049043.1_cds_YP_009865453.1_20	0.4524	0.1351	0.4541	0.2204	49.23	0.265	0.386
NC_049043.1_cds_YP_009865454.1_21	0.3898	0.2109	0.4118	0.2563	53.63	0.355	0.386
NC_049043.1_cds_YP_009865455.1_22	0.3344	0.2571	0.4506	0.3001	54.38	0.396	0.359
NC_049043.1_cds_YP_009865456.1_23	0.4895	0.1632	0.4425	0.1611	46.71	0.244	0.366
NC_049043.1_cds_YP_009865457.1_24	0.4764	0.1604	0.4404	0.1124	42.41	0.222	0.36
NC_049043.1_cds_YP_009865459.1_26	0.4138	0.1793	0.4516	0.2735	47.7	0.333	0.376
NC_049043.1_cds_YP_009865460.1_27	0.2563	0.2646	0.3294	0.4437	58.57	0.534	0.431
NC_049043.1_cds_YP_009865464.1_31	0.4052	0.2274	0.4626	0.2471	52.6	0.344	0.364
NC_049043.1_cds_YP_009865466.1_33	0.3986	0.2365	0.3594	0.2696	53.14	0.386	0.387
NC_049043.1_cds_YP_009865467.1_34	0.4863	0.2077	0.4317	0.1736	53.4	0.284	0.343
NC_049043.1_cds_YP_009865468.1_35	0.5039	0.1473	0.3721	0.2291	47.45	0.285	0.399
NC_049043.1_cds_YP_009865477.1_44	0.5	0.122	0.4457	0.1829	39.18	0.234	0.333
NC_049043.1_cds_YP_009865478.1_45	0.2588	0.2471	0.5581	0.2254	36.29	0.346	0.339
NC_049043.1_cds_YP_009865479.1_46	0.3021	0.3125	0.358	0.3158	61	0.482	0.466
NC_049043.1_cds_YP_009865480.1_47	0.2536	0.2971	0.315	0.4828	52.16	0.564	0.432
NC_049043.1_cds_YP_009865481.1_48	0.4966	0.1632	0.379	0.1536	48.47	0.258	0.438
NC_049043.1_cds_YP_009865485.1_52	0.4368	0.2684	0.252	0.2844	47.45	0.418	0.41
NC_049043.1_cds_YP_009865486.1_53	0.4737	0.3158	0.2079	0.1744	39.43	0.404	0.392
NC_049043.1_cds_YP_009865487.1_54	0.2996	0.2687	0.4732	0.3161	51.3	0.413	0.345
NC_049043.1_cds_YP_009865488.1_55	0.172	0.3118	0.4343	0.3684	47.22	0.52	0.461
NC_049043.1_cds_YP_009865490.1_57	0.4242	0.2222	0.4054	0.3571	51.18	0.395	0.361
NC_049043.1_cds_YP_009865491.1_58	0.2222	0.2469	0.3875	0.4507	52.33	0.515	0.412
NC_049043.1_cds_YP_009865492.1_59	0.2283	0.3152	0.4783	0.3488	60.75	0.476	0.452
NC_049043.1_cds_YP_009865493.1_60	0.4151	0.2138	0.4748	0.2422	36.37	0.33	0.342
NC_049043.1_cds_YP_009865495.1_62	0.3077	0.2821	0.3657	0.35	58.97	0.472	0.459
NC_049043.1_cds_YP_009865497.1_64	0.4455	0.2032	0.3987	0.2674	52.52	0.341	0.375
NC_049043.1_cds_YP_009865498.1_65	0.4296	0.2113	0.4192	0.1355	49.36	0.282	0.377
NC_049043.1_cds_YP_009865499.1_66	0.3016	0.3016	0.3874	0.28	38.68	0.449	0.416
NC_049043.1_cds_YP_009865500.1_67	0.5392	0.1191	0.4404	0.1422	43.11	0.195	0.311
NC_049043.1_cds_YP_009865502.1_69	0.4937	0.135	0.4278	0.2364	48.07	0.262	0.326
NC_049043.1_cds_YP_009865503.1_70	0.4236	0.1736	0.4496	0.1595	46.07	0.261	0.353
NC_049043.1_cds_YP_009865505.1_72	0.5513	0.2564	0.34	0.2273	44	0.333	0.337
NC_049043.1_cds_YP_009865506.1_73	0.4906	0.1195	0.4222	0.1429	44.13	0.206	0.347
NC_049043.1_cds_YP_009865507.1_74	0.5407	0.1333	0.4865	0.1398	46.68	0.196	0.335
NC_049043.1_cds_YP_009865508.1_75	0.4669	0.1104	0.4895	0.1189	43.04	0.182	0.331
NC_049043.1_cds_YP_009865509.1_76	0.482	0.118	0.5087	0.1538	49.05	0.202	0.373
NC_049043.1_cds_YP_009865511.1_78	0.3708	0.2181	0.5318	0.2376	51.32	0.316	0.3
NC_049043.1_cds_YP_009865512.1_79	0.4167	0.1417	0.5271	0.1186	46.53	0.208	0.406
NC_049043.1_cds_YP_009865513.1_80	0.4296	0.2113	0.4192	0.1355	49.36	0.282	0.377
NC_049043.1_cds_YP_009865514.1_81	0.3458	0.2621	0.4021	0.2685	53.86	0.396	0.384
NC_049043.1_cds_YP_009865516.1_83	0.1989	0.2742	0.4293	0.3652	57.74	0.487	0.45
NC_049044.1_cds_YP_009865517.1_1	0.3021	0.3125	0.3659	0.3117	60.67	0.478	0.464
NC_049044.1_cds_YP_009865518.1_2	0.2979	0.2092	0.3108	0.3605	57.46	0.469	0.432
NC_049044.1_cds_YP_009865519.1_3	0.5319	0.1608	0.4119	0.2079	48.95	0.261	0.314
NC_049044.1_cds_YP_009865520.1_4	0.3298	0.3003	0.3552	0.2537	53	0.445	0.459
NC_049044.1_cds_YP_009865521.1_5	0.2364	0.2788	0.3314	0.4367	54.04	0.545	0.437
NC_049044.1_cds_YP_009865522.1_6	0.4242	0.303	0.3714	0.2353	51.09	0.404	0.413
NC_049044.1_cds_YP_009865523.1_7	0.505	0.1188	0.4535	0.1286	44.96	0.189	0.35
NC_049044.1_cds_YP_009865524.1_8	0.4778	0.1611	0.4487	0.1408	48.8	0.239	0.39
NC_049044.1_cds_YP_009865525.1_9	0.4919	0.1532	0.4643	0.1633	49.08	0.236	0.386
NC_049044.1_cds_YP_009865526.1_10	0.4903	0.1548	0.454	0.1544	45.71	0.239	0.375
NC_049044.1_cds_YP_009865527.1_11	0.4925	0.1716	0.4454	0.1961	50.62	0.265	0.387
NC_049044.1_cds_YP_009865528.1_12	0.3899	0.2821	0.3355	0.2373	53.02	0.409	0.437
NC_049044.1_cds_YP_009865529.1_13	0.3806	0.285	0.3474	0.2285	48.72	0.407	0.419
NC_049044.1_cds_YP_009865530.1_14	0.4156	0.0649	0.5185	0.2237	40.52	0.229	0.39
NC_049044.1_cds_YP_009865532.1_16	0.3343	0.2472	0.241	0.3947	57.73	0.511	0.458
NC_049044.1_cds_YP_009865533.1_17	0.3659	0.2391	0.2336	0.3973	57	0.495	0.436
NC_049044.1_cds_YP_009865536.1_20	0.4524	0.1375	0.4534	0.2193	49.34	0.266	0.386
NC_049044.1_cds_YP_009865537.1_21	0.3917	0.209	0.415	0.2519	53.38	0.35	0.385
NC_049044.1_cds_YP_009865538.1_22	0.332	0.2573	0.4492	0.3004	54.77	0.397	0.36
NC_049044.1_cds_YP_009865539.1_23	0.4895	0.1632	0.4425	0.1622	46.61	0.244	0.364
NC_049044.1_cds_YP_009865540.1_24	0.4764	0.1651	0.4352	0.1124	42.83	0.226	0.363
NC_049044.1_cds_YP_009865542.1_26	0.4184	0.1773	0.4553	0.25	45.65	0.32	0.378
NC_049044.1_cds_YP_009865543.1_27	0.2549	0.2661	0.3294	0.4387	60.43	0.533	0.431
NC_049044.1_cds_YP_009865547.1_31	0.4076	0.2317	0.4624	0.246	51.56	0.345	0.36
NC_049044.1_cds_YP_009865549.1_33	0.3916	0.2378	0.3492	0.2807	56.08	0.398	0.392
NC_049044.1_cds_YP_009865550.1_34	0.4837	0.2065	0.4286	0.1803	54.03	0.287	0.343
NC_049044.1_cds_YP_009865551.1_35	0.5039	0.1406	0.3643	0.2456	47.26	0.292	0.402
NC_049044.1_cds_YP_009865560.1_44	0.5128	0.1154	0.4205	0.1923	37.91	0.238	0.343
NC_049044.1_cds_YP_009865561.1_45	0.2558	0.2442	0.5581	0.2254	36.11	0.346	0.346
NC_049044.1_cds_YP_009865562.1_46	0.3021	0.3125	0.3659	0.3117	60.67	0.478	0.464
NC_049044.1_cds_YP_009865563.1_47	0.25	0.3088	0.3175	0.4741	52.47	0.567	0.431
NC_049044.1_cds_YP_009865564.1_48	0.5011	0.1586	0.371	0.1623	48.64	0.26	0.438
NC_049044.1_cds_YP_009865568.1_52	0.4392	0.2646	0.2459	0.2963	47.38	0.421	0.408
NC_049044.1_cds_YP_009865569.1_53	0.4737	0.3158	0.21	0.1765	40.41	0.404	0.395
NC_049044.1_cds_YP_009865570.1_54	0.2895	0.2719	0.4757	0.3125	51.05	0.416	0.346
NC_049044.1_cds_YP_009865571.1_55	0.172	0.3118	0.4242	0.383	46.28	0.528	0.458
NC_049044.1_cds_YP_009865573.1_57	0.4242	0.2222	0.411	0.3623	52.45	0.395	0.363
NC_049044.1_cds_YP_009865574.1_58	0.2222	0.2469	0.3875	0.4507	52.33	0.515	0.412
NC_049044.1_cds_YP_009865575.1_59	0.2283	0.3152	0.4783	0.3488	59.17	0.476	0.45
NC_049044.1_cds_YP_009865576.1_60	0.4151	0.2138	0.4748	0.2422	36.61	0.33	0.342
NC_049044.1_cds_YP_009865578.1_62	0.3096	0.2843	0.3652	0.3436	59.14	0.471	0.461
NC_049044.1_cds_YP_009865580.1_64	0.4466	0.2032	0.3981	0.2667	52.54	0.34	0.375
NC_049044.1_cds_YP_009865581.1_65	0.4296	0.2113	0.4192	0.135	49.4	0.282	0.378
NC_049044.1_cds_YP_009865582.1_66	0.3016	0.3016	0.3874	0.28	38.68	0.449	0.416
NC_049044.1_cds_YP_009865583.1_67	0.3644	0.2712	0.301	0.3011	55.47	0.448	0.502
NC_049044.1_cds_YP_009865584.1_68	0.5552	0.1073	0.4324	0.1413	42.35	0.184	0.309
NC_049044.1_cds_YP_009865586.1_70	0.4958	0.1429	0.4197	0.2317	48.87	0.266	0.328
NC_049044.1_cds_YP_009865587.1_71	0.4236	0.1713	0.4578	0.1523	46.67	0.255	0.351
NC_049044.1_cds_YP_009865589.1_73	0.5513	0.2564	0.3333	0.2222	42.69	0.333	0.341
NC_049044.1_cds_YP_009865590.1_74	0.4843	0.1258	0.4179	0.1532	44.77	0.218	0.347
NC_049044.1_cds_YP_009865591.1_75	0.5407	0.1259	0.5045	0.129	46.09	0.184	0.333
NC_049044.1_cds_YP_009865592.1_76	0.4637	0.1104	0.4895	0.1235	43.41	0.185	0.331
NC_049044.1_cds_YP_009865593.1_77	0.4885	0.118	0.4983	0.1579	48.65	0.204	0.375
NC_049044.1_cds_YP_009865595.1_79	0.3692	0.217	0.5297	0.2428	50.61	0.318	0.301
NC_049044.1_cds_YP_009865596.1_80	0.4167	0.1417	0.5271	0.1186	46.53	0.208	0.406
NC_049044.1_cds_YP_009865597.1_81	0.4296	0.2113	0.4192	0.135	49.4	0.282	0.378
NC_049044.1_cds_YP_009865598.1_82	0.345	0.2626	0.4028	0.2685	53.93	0.396	0.384
NC_049044.1_cds_YP_009865600.1_84	0.1968	0.2713	0.4271	0.3687	57.94	0.49	0.455
NC_049045.1_cds_YP_009865601.1_1	0.3021	0.3125	0.358	0.3158	61	0.482	0.466
NC_049045.1_cds_YP_009865602.1_2	0.2979	0.2092	0.3108	0.3605	57.09	0.469	0.432
NC_049045.1_cds_YP_009865603.1_3	0.5225	0.1678	0.4096	0.2098	49.68	0.269	0.318
NC_049045.1_cds_YP_009865604.1_4	0.3289	0.2995	0.3515	0.2545	52.74	0.446	0.459
NC_049045.1_cds_YP_009865605.1_5	0.2364	0.2788	0.3314	0.4377	53.06	0.545	0.438
NC_049045.1_cds_YP_009865606.1_6	0.4286	0.2959	0.3768	0.2388	51.64	0.398	0.408
NC_049045.1_cds_YP_009865607.1_7	0.5149	0.099	0.4368	0.1549	44.73	0.189	0.347
NC_049045.1_cds_YP_009865608.1_8	0.4722	0.1667	0.4551	0.1338	48.79	0.239	0.39
NC_049045.1_cds_YP_009865609.1_9	0.4919	0.1452	0.4821	0.1531	48.74	0.223	0.382
NC_049045.1_cds_YP_009865610.1_10	0.5	0.1494	0.4451	0.16	45.86	0.239	0.376
NC_049045.1_cds_YP_009865611.1_11	0.4962	0.1654	0.4407	0.2059	51.5	0.267	0.389
NC_049045.1_cds_YP_009865612.1_12	0.3892	0.2816	0.3341	0.2386	52.93	0.41	0.437
NC_049045.1_cds_YP_009865613.1_13	0.3806	0.285	0.3474	0.2285	48.64	0.407	0.418
NC_049045.1_cds_YP_009865614.1_14	0.4156	0.0649	0.5185	0.2237	41.19	0.229	0.39
NC_049045.1_cds_YP_009865616.1_16	0.3333	0.2493	0.241	0.3947	57.69	0.512	0.457
NC_049045.1_cds_YP_009865617.1_17	0.3659	0.2391	0.2336	0.3973	58.7	0.495	0.435
NC_049045.1_cds_YP_009865620.1_20	0.4512	0.1363	0.4517	0.2231	49.32	0.268	0.387
NC_049045.1_cds_YP_009865621.1_21	0.3898	0.2109	0.4136	0.2551	53.5	0.354	0.386
NC_049045.1_cds_YP_009865622.1_22	0.3351	0.2601	0.4451	0.3003	54.92	0.399	0.361
NC_049045.1_cds_YP_009865623.1_23	0.4895	0.1632	0.4425	0.1611	46.71	0.244	0.366
NC_049045.1_cds_YP_009865624.1_24	0.4764	0.1604	0.4352	0.1183	42.47	0.226	0.363
NC_049045.1_cds_YP_009865626.1_26	0.4214	0.1786	0.4508	0.2522	46.72	0.321	0.38
NC_049045.1_cds_YP_009865627.1_27	0.2563	0.2646	0.3294	0.4419	59.3	0.533	0.431
NC_049045.1_cds_YP_009865631.1_31	0.4052	0.2303	0.4607	0.248	52.22	0.346	0.364
NC_049045.1_cds_YP_009865633.1_33	0.3933	0.2333	0.3692	0.265	52.55	0.382	0.383
NC_049045.1_cds_YP_009865634.1_34	0.4863	0.2077	0.4317	0.1736	53.33	0.284	0.343
NC_049045.1_cds_YP_009865635.1_35	0.5078	0.1445	0.3682	0.2325	47	0.286	0.4
NC_049045.1_cds_YP_009865644.1_44	0.5128	0.1154	0.4318	0.1818	37.34	0.228	0.337
NC_049045.1_cds_YP_009865645.1_45	0.2588	0.2471	0.5581	0.2254	36.26	0.346	0.343
NC_049045.1_cds_YP_009865646.1_46	0.3021	0.3125	0.358	0.3158	61	0.482	0.466
NC_049045.1_cds_YP_009865647.1_47	0.25	0.3015	0.3175	0.487	52.29	0.567	0.431
NC_049045.1_cds_YP_009865648.1_48	0.4966	0.1632	0.371	0.1623	48.88	0.264	0.44
NC_049045.1_cds_YP_009865652.1_52	0.4368	0.2684	0.252	0.2844	47.38	0.418	0.408
NC_049045.1_cds_YP_009865653.1_53	0.4737	0.3158	0.2157	0.1724	37.95	0.401	0.392
NC_049045.1_cds_YP_009865654.1_54	0.2895	0.2719	0.4831	0.3068	53.42	0.411	0.344
NC_049045.1_cds_YP_009865655.1_55	0.172	0.3118	0.4343	0.3723	46.55	0.52	0.458
NC_049045.1_cds_YP_009865657.1_57	0.4242	0.2222	0.411	0.3623	52.45	0.395	0.363
NC_049045.1_cds_YP_009865658.1_58	0.2222	0.2469	0.3875	0.4507	52.33	0.515	0.412
NC_049045.1_cds_YP_009865659.1_59	0.2283	0.3152	0.4835	0.3529	57.82	0.476	0.447
NC_049045.1_cds_YP_009865660.1_60	0.4151	0.2138	0.4748	0.2422	36.61	0.33	0.342
NC_049045.1_cds_YP_009865662.1_62	0.303	0.2828	0.3672	0.3519	59.99	0.475	0.462
NC_049045.1_cds_YP_009865664.1_64	0.4463	0.2038	0.3979	0.2663	52.59	0.341	0.375
NC_049045.1_cds_YP_009865665.1_65	0.4296	0.2113	0.4192	0.1355	49.36	0.282	0.377
NC_049045.1_cds_YP_009865666.1_66	0.3016	0.3016	0.3874	0.28	38.68	0.449	0.416
NC_049045.1_cds_YP_009865667.1_67	0.3667	0.275	0.3056	0.2857	50.98	0.442	0.498
NC_049045.1_cds_YP_009865668.1_68	0.5453	0.1156	0.4349	0.1422	43.38	0.192	0.31
NC_049045.1_cds_YP_009865670.1_70	0.4916	0.1429	0.4249	0.2303	49.34	0.266	0.328
NC_049045.1_cds_YP_009865671.1_71	0.4269	0.1717	0.4521	0.1561	45.73	0.257	0.353
NC_049045.1_cds_YP_009865673.1_73	0.5513	0.2564	0.3333	0.2222	42.69	0.333	0.341
NC_049045.1_cds_YP_009865674.1_74	0.4969	0.1132	0.4222	0.1429	44.52	0.2	0.345
NC_049045.1_cds_YP_009865675.1_75	0.5407	0.1333	0.4865	0.1383	46.28	0.196	0.339
NC_049045.1_cds_YP_009865676.1_76	0.4669	0.1136	0.4912	0.1157	43.1	0.182	0.329
NC_049045.1_cds_YP_009865677.1_77	0.482	0.1148	0.5052	0.1619	49.12	0.204	0.375
NC_049045.1_cds_YP_009865679.1_79	0.3705	0.2205	0.5341	0.2411	50.78	0.318	0.298
NC_049045.1_cds_YP_009865680.1_80	0.4167	0.1417	0.5271	0.1186	46.53	0.208	0.406
NC_049045.1_cds_YP_009865681.1_81	0.4296	0.2113	0.4192	0.1355	49.36	0.282	0.377
NC_049045.1_cds_YP_009865682.1_82	0.3448	0.2613	0.4026	0.2697	53.93	0.396	0.384
NC_049045.1_cds_YP_009865684.1_84	0.1979	0.2781	0.4192	0.3708	58.24	0.496	0.456
NC_049046.1_cds_YP_009865685.1_1	0.3021	0.3125	0.3659	0.3117	60.67	0.478	0.464
NC_049046.1_cds_YP_009865686.1_2	0.2979	0.2092	0.3108	0.3605	57.46	0.469	0.432
NC_049046.1_cds_YP_009865687.1_3	0.541	0.1522	0.4183	0.2051	47.7	0.252	0.311
NC_049046.1_cds_YP_009865688.1_4	0.3315	0.2992	0.3564	0.2509	53.07	0.442	0.457
NC_049046.1_cds_YP_009865689.1_5	0.2394	0.2758	0.3343	0.4335	54.38	0.54	0.436
NC_049046.1_cds_YP_009865690.1_6	0.4286	0.2959	0.3714	0.2353	51.14	0.398	0.411
NC_049046.1_cds_YP_009865691.1_7	0.505	0.1089	0.4483	0.1408	44.88	0.189	0.35
NC_049046.1_cds_YP_009865692.1_8	0.4722	0.1667	0.4487	0.1408	48.9	0.244	0.391
NC_049046.1_cds_YP_009865693.1_9	0.5	0.1452	0.4643	0.1633	48.76	0.23	0.384
NC_049046.1_cds_YP_009865694.1_10	0.5	0.1429	0.4573	0.1533	44.33	0.228	0.37
NC_049046.1_cds_YP_009865695.1_11	0.4962	0.1654	0.4576	0.1881	50.36	0.255	0.383
NC_049046.1_cds_YP_009865696.1_12	0.3899	0.2837	0.3363	0.2354	52.28	0.409	0.434
NC_049046.1_cds_YP_009865697.1_13	0.3806	0.285	0.3474	0.2285	48.72	0.407	0.419
NC_049046.1_cds_YP_009865698.1_14	0.4156	0.0649	0.5185	0.2237	40.52	0.229	0.39
NC_049046.1_cds_YP_009865700.1_16	0.3333	0.2465	0.241	0.3947	57.16	0.511	0.458
NC_049046.1_cds_YP_009865701.1_17	0.3659	0.2391	0.2336	0.3973	57.69	0.495	0.435
NC_049046.1_cds_YP_009865704.1_20	0.4524	0.1363	0.4552	0.2199	49.5	0.265	0.385
NC_049046.1_cds_YP_009865705.1_21	0.3898	0.2109	0.41	0.2582	53.46	0.356	0.387
NC_049046.1_cds_YP_009865706.1_22	0.334	0.2599	0.4487	0.2996	54.63	0.398	0.359
NC_049046.1_cds_YP_009865707.1_23	0.4868	0.164	0.44	0.1678	46.74	0.249	0.366
NC_049046.1_cds_YP_009865708.1_24	0.4764	0.1651	0.4352	0.1124	42.23	0.226	0.363
NC_049046.1_cds_YP_009865710.1_26	0.4184	0.1773	0.4553	0.25	45.65	0.32	0.378
NC_049046.1_cds_YP_009865711.1_27	0.2605	0.2633	0.3304	0.4369	60.57	0.529	0.429
NC_049046.1_cds_YP_009865715.1_31	0.4094	0.2281	0.4679	0.2421	51.12	0.339	0.359
NC_049046.1_cds_YP_009865717.1_33	0.4027	0.2349	0.3538	0.2627	53.02	0.384	0.388
NC_049046.1_cds_YP_009865718.1_34	0.4837	0.2065	0.4286	0.1803	54.03	0.287	0.343
NC_049046.1_cds_YP_009865719.1_35	0.5039	0.1406	0.3668	0.2412	47.46	0.289	0.4
NC_049046.1_cds_YP_009865728.1_44	0.5	0.122	0.4457	0.1829	39.18	0.234	0.333
NC_049046.1_cds_YP_009865729.1_45	0.2558	0.2442	0.5581	0.2254	36.11	0.346	0.346
NC_049046.1_cds_YP_009865730.1_46	0.3021	0.3125	0.3659	0.3117	60.67	0.478	0.464
NC_049046.1_cds_YP_009865731.1_47	0.259	0.295	0.3228	0.4783	51.24	0.555	0.425
NC_049046.1_cds_YP_009865732.1_48	0.4989	0.1609	0.371	0.1623	48.69	0.262	0.44
NC_049046.1_cds_YP_009865736.1_52	0.4368	0.2684	0.2459	0.287	49.65	0.421	0.41
NC_049046.1_cds_YP_009865737.1_53	0.4737	0.3158	0.21	0.1765	39.57	0.404	0.392
NC_049046.1_cds_YP_009865738.1_54	0.2939	0.2719	0.4732	0.3143	51.67	0.416	0.344
NC_049046.1_cds_YP_009865739.1_55	0.172	0.3118	0.4343	0.3723	44.9	0.52	0.45
NC_049046.1_cds_YP_009865741.1_57	0.4242	0.2222	0.411	0.3623	52.45	0.395	0.363
NC_049046.1_cds_YP_009865742.1_58	0.2222	0.2469	0.3875	0.4507	52.33	0.515	0.412
NC_049046.1_cds_YP_009865743.1_59	0.2283	0.3152	0.4783	0.3488	59.17	0.476	0.45
NC_049046.1_cds_YP_009865744.1_60	0.4151	0.2138	0.4783	0.2441	36.72	0.33	0.34
NC_049046.1_cds_YP_009865746.1_62	0.3096	0.2843	0.3652	0.3436	59.14	0.471	0.461
NC_049046.1_cds_YP_009865748.1_64	0.4471	0.2028	0.3968	0.2674	52.44	0.34	0.375
NC_049046.1_cds_YP_009865749.1_65	0.4296	0.2113	0.4192	0.135	49.4	0.282	0.378
NC_049046.1_cds_YP_009865750.1_66	0.3016	0.3016	0.3874	0.28	38.68	0.449	0.416
NC_049046.1_cds_YP_009865751.1_67	0.5524	0.1127	0.4346	0.1361	42.54	0.186	0.308
NC_049046.1_cds_YP_009865753.1_69	0.4958	0.1429	0.4175	0.2289	48.96	0.266	0.33
NC_049046.1_cds_YP_009865754.1_70	0.4226	0.1709	0.4523	0.1589	46.58	0.259	0.352
NC_049046.1_cds_YP_009865756.1_72	0.5513	0.2564	0.3269	0.2174	40.59	0.333	0.344
NC_049046.1_cds_YP_009865757.1_73	0.4906	0.1195	0.4222	0.1429	44.82	0.206	0.343
NC_049046.1_cds_YP_009865758.1_74	0.5407	0.1333	0.5045	0.1183	46.16	0.184	0.331
NC_049046.1_cds_YP_009865759.1_75	0.4637	0.1136	0.4912	0.1193	43.23	0.185	0.329
NC_049046.1_cds_YP_009865760.1_76	0.4901	0.1151	0.5035	0.1557	48.51	0.2	0.372
NC_049046.1_cds_YP_009865762.1_78	0.3669	0.2217	0.534	0.2365	50.91	0.318	0.3
NC_049046.1_cds_YP_009865763.1_79	0.4167	0.1417	0.5271	0.1186	46.53	0.208	0.406
NC_049046.1_cds_YP_009865764.1_80	0.4296	0.2113	0.4192	0.135	49.4	0.282	0.378
NC_049046.1_cds_YP_009865765.1_81	0.345	0.263	0.4026	0.2684	54.03	0.396	0.384
NC_049046.1_cds_YP_009865767.1_83	0.1968	0.2713	0.4271	0.3687	57.94	0.49	0.455
NC_049047.1_cds_YP_009865768.1_1	0.3021	0.3125	0.358	0.3158	61	0.482	0.466
NC_049047.1_cds_YP_009865769.1_2	0.2979	0.2092	0.3095	0.3605	57.2	0.469	0.432
NC_049047.1_cds_YP_009865770.1_3	0.5224	0.1694	0.4119	0.2079	49.54	0.269	0.316
NC_049047.1_cds_YP_009865771.1_4	0.3306	0.2984	0.3537	0.25	53.3	0.442	0.46
NC_049047.1_cds_YP_009865772.1_5	0.2356	0.2779	0.3324	0.4381	52.93	0.545	0.437
NC_049047.1_cds_YP_009865773.1_6	0.4286	0.2959	0.3714	0.2353	51.14	0.398	0.411
NC_049047.1_cds_YP_009865774.1_7	0.505	0.1188	0.4419	0.1429	45.2	0.198	0.353
NC_049047.1_cds_YP_009865775.1_8	0.4722	0.1667	0.4551	0.1338	48.6	0.239	0.39
NC_049047.1_cds_YP_009865776.1_9	0.4919	0.1452	0.4821	0.1531	48.08	0.223	0.382
NC_049047.1_cds_YP_009865777.1_10	0.4935	0.1494	0.4573	0.1533	45.4	0.234	0.375
NC_049047.1_cds_YP_009865778.1_11	0.4962	0.1654	0.4407	0.2059	51.5	0.267	0.389
NC_049047.1_cds_YP_009865779.1_12	0.3892	0.2816	0.3355	0.2391	52.81	0.41	0.436
NC_049047.1_cds_YP_009865780.1_13	0.3789	0.2867	0.3497	0.2279	48.35	0.408	0.419
NC_049047.1_cds_YP_009865781.1_14	0.4156	0.0649	0.5185	0.2237	41.13	0.229	0.393
NC_049047.1_cds_YP_009865783.1_16	0.3352	0.2479	0.241	0.3947	57.67	0.511	0.456
NC_049047.1_cds_YP_009865784.1_17	0.3646	0.2383	0.2336	0.3973	56.91	0.495	0.436
NC_049047.1_cds_YP_009865787.1_20	0.4524	0.1351	0.4522	0.2231	49.44	0.267	0.387
NC_049047.1_cds_YP_009865788.1_21	0.3898	0.2109	0.4114	0.2569	53.86	0.355	0.387
NC_049047.1_cds_YP_009865789.1_22	0.334	0.257	0.4492	0.3026	54.79	0.398	0.359
NC_049047.1_cds_YP_009865790.1_23	0.4895	0.1632	0.4425	0.1611	46.71	0.244	0.366
NC_049047.1_cds_YP_009865791.1_24	0.4764	0.1604	0.4352	0.1183	42.47	0.226	0.363
NC_049047.1_cds_YP_009865793.1_26	0.4126	0.1818	0.4435	0.2735	49.13	0.337	0.379
NC_049047.1_cds_YP_009865794.1_27	0.2563	0.2646	0.3294	0.4419	59.3	0.533	0.431
NC_049047.1_cds_YP_009865798.1_31	0.4064	0.2281	0.4591	0.251	52.27	0.346	0.364
NC_049047.1_cds_YP_009865800.1_33	0.3893	0.2349	0.3721	0.2672	52.72	0.384	0.381
NC_049047.1_cds_YP_009865801.1_34	0.4863	0.2077	0.4317	0.1736	53.33	0.284	0.343
NC_049047.1_cds_YP_009865802.1_35	0.5039	0.1484	0.3682	0.2325	47.34	0.289	0.401
NC_049047.1_cds_YP_009865811.1_44	0.5128	0.1154	0.4318	0.1795	37.66	0.228	0.34
NC_049047.1_cds_YP_009865812.1_45	0.2588	0.2471	0.5581	0.2254	36.26	0.346	0.343
NC_049047.1_cds_YP_009865813.1_46	0.3021	0.3125	0.358	0.3158	61	0.482	0.466
NC_049047.1_cds_YP_009865814.1_47	0.259	0.295	0.3281	0.4701	51.54	0.552	0.426
NC_049047.1_cds_YP_009865815.1_48	0.4966	0.1632	0.379	0.1536	48.74	0.258	0.438
NC_049047.1_cds_YP_009865819.1_52	0.4368	0.2684	0.252	0.2844	47.45	0.418	0.41
NC_049047.1_cds_YP_009865820.1_53	0.4737	0.3158	0.2178	0.1744	39.48	0.401	0.394
NC_049047.1_cds_YP_009865821.1_54	0.2882	0.2707	0.4783	0.3125	51.14	0.415	0.346
NC_049047.1_cds_YP_009865822.1_55	0.172	0.3118	0.4343	0.3723	46.55	0.52	0.458
NC_049047.1_cds_YP_009865824.1_57	0.4242	0.2222	0.411	0.3623	52.45	0.395	0.363
NC_049047.1_cds_YP_009865825.1_58	0.2222	0.2469	0.3875	0.4507	52.33	0.515	0.412
NC_049047.1_cds_YP_009865826.1_59	0.2283	0.3152	0.4783	0.3488	59.17	0.476	0.45
NC_049047.1_cds_YP_009865827.1_60	0.4188	0.2125	0.471	0.2441	37.62	0.33	0.343
NC_049047.1_cds_YP_009865829.1_62	0.3077	0.2821	0.3714	0.3438	59.73	0.468	0.46
NC_049047.1_cds_YP_009865831.1_64	0.4461	0.2037	0.3985	0.2658	52.55	0.34	0.374
NC_049047.1_cds_YP_009865832.1_65	0.4319	0.2113	0.4164	0.1355	49.53	0.282	0.377
NC_049047.1_cds_YP_009865833.1_66	0.3016	0.3016	0.3874	0.28	38.68	0.449	0.416
NC_049047.1_cds_YP_009865834.1_67	0.5509	0.1142	0.4308	0.1422	43.29	0.191	0.311
NC_049047.1_cds_YP_009865836.1_69	0.4937	0.1435	0.4249	0.2303	49	0.266	0.328
NC_049047.1_cds_YP_009865837.1_70	0.4296	0.1686	0.4508	0.1561	45.64	0.255	0.352
NC_049047.1_cds_YP_009865839.1_72	0.5513	0.2564	0.3333	0.2222	42.69	0.333	0.344
NC_049047.1_cds_YP_009865840.1_73	0.4906	0.1195	0.4222	0.1429	45.22	0.206	0.348
NC_049047.1_cds_YP_009865841.1_74	0.5407	0.1333	0.4955	0.129	46.27	0.19	0.335
NC_049047.1_cds_YP_009865842.1_75	0.4637	0.1104	0.4982	0.1152	42.95	0.179	0.329
NC_049047.1_cds_YP_009865843.1_76	0.482	0.1148	0.5017	0.166	49.2	0.207	0.376
NC_049047.1_cds_YP_009865845.1_78	0.3674	0.2201	0.5326	0.2396	50.9	0.318	0.299
NC_049047.1_cds_YP_009865846.1_79	0.4167	0.1417	0.5271	0.1186	46.53	0.208	0.406
NC_049047.1_cds_YP_009865847.1_80	0.4319	0.2113	0.4164	0.1355	49.53	0.282	0.377
NC_049047.1_cds_YP_009865848.1_81	0.345	0.2626	0.4032	0.2677	53.8	0.396	0.384
NC_049047.1_cds_YP_009865850.1_83	0.1989	0.2742	0.4264	0.3672	57.96	0.489	0.453
NC_049048.1_cds_YP_009865851.1_1	0.3021	0.3125	0.358	0.3158	61	0.482	0.466
NC_049048.1_cds_YP_009865852.1_2	0.2989	0.21	0.312	0.3578	55.94	0.467	0.431
NC_049048.1_cds_YP_009865853.1_3	0.5307	0.1651	0.4086	0.2093	49.17	0.265	0.316
NC_049048.1_cds_YP_009865854.1_4	0.3306	0.2984	0.3515	0.2509	52.28	0.443	0.459
NC_049048.1_cds_YP_009865855.1_5	0.2356	0.2779	0.3324	0.4381	54.31	0.545	0.438
NC_049048.1_cds_YP_009865856.1_6	0.4286	0.2959	0.3714	0.2353	51.14	0.398	0.411
NC_049048.1_cds_YP_009865857.1_7	0.505	0.1089	0.4483	0.1408	44.88	0.189	0.35
NC_049048.1_cds_YP_009865858.1_8	0.4722	0.1667	0.4487	0.1418	48.98	0.244	0.39
NC_049048.1_cds_YP_009865859.1_9	0.4919	0.1532	0.4643	0.1633	49.08	0.236	0.386
NC_049048.1_cds_YP_009865860.1_10	0.4935	0.1429	0.4634	0.1533	45.04	0.228	0.373
NC_049048.1_cds_YP_009865861.1_11	0.4962	0.1654	0.4407	0.2059	52.09	0.267	0.387
NC_049048.1_cds_YP_009865862.1_12	0.3899	0.2821	0.3355	0.2379	52.87	0.409	0.435
NC_049048.1_cds_YP_009865863.1_13	0.3812	0.2855	0.3482	0.2266	48.63	0.406	0.418
NC_049048.1_cds_YP_009865864.1_14	0.4156	0.0649	0.5185	0.2237	40.91	0.229	0.39
NC_049048.1_cds_YP_009865866.1_16	0.3371	0.2472	0.2432	0.3953	57.87	0.509	0.455
NC_049048.1_cds_YP_009865867.1_17	0.3659	0.2391	0.2336	0.3973	57.73	0.495	0.434
NC_049048.1_cds_YP_009865870.1_20	0.4524	0.134	0.4583	0.2179	49.06	0.263	0.386
NC_049048.1_cds_YP_009865871.1_21	0.3898	0.2109	0.4114	0.2576	53.72	0.355	0.387
NC_049048.1_cds_YP_009865872.1_22	0.3358	0.2565	0.4483	0.3015	54.42	0.396	0.36
NC_049048.1_cds_YP_009865873.1_23	0.4842	0.1684	0.4483	0.1544	46.71	0.244	0.366
NC_049048.1_cds_YP_009865874.1_24	0.467	0.1698	0.4404	0.1124	42.42	0.23	0.364
NC_049048.1_cds_YP_009865876.1_26	0.4214	0.1786	0.4508	0.2522	45.5	0.321	0.378
NC_049048.1_cds_YP_009865877.1_27	0.2563	0.2646	0.3294	0.4419	59.3	0.533	0.431
NC_049048.1_cds_YP_009865881.1_31	0.4076	0.2287	0.4679	0.2441	51.03	0.341	0.361
NC_049048.1_cds_YP_009865883.1_33	0.3867	0.2333	0.3664	0.2712	53.52	0.387	0.386
NC_049048.1_cds_YP_009865884.1_34	0.4863	0.2077	0.4317	0.1736	53.41	0.284	0.344
NC_049048.1_cds_YP_009865885.1_35	0.5078	0.1406	0.3643	0.2412	47.1	0.289	0.401
NC_049048.1_cds_YP_009865894.1_44	0.5128	0.1154	0.4318	0.1795	37.66	0.228	0.34
NC_049048.1_cds_YP_009865895.1_45	0.2558	0.2558	0.5529	0.2286	40.44	0.355	0.34
NC_049048.1_cds_YP_009865896.1_46	0.3021	0.3125	0.358	0.3158	61	0.482	0.466
NC_049048.1_cds_YP_009865897.1_47	0.2555	0.2993	0.315	0.487	52.76	0.564	0.429
NC_049048.1_cds_YP_009865898.1_48	0.4966	0.1632	0.3683	0.1652	48.98	0.266	0.441
NC_049048.1_cds_YP_009865902.1_52	0.4368	0.2684	0.2541	0.287	47.75	0.418	0.408
NC_049048.1_cds_YP_009865903.1_53	0.4737	0.3158	0.2079	0.1744	39.63	0.404	0.395
NC_049048.1_cds_YP_009865904.1_54	0.2895	0.2719	0.4757	0.3125	50.88	0.416	0.346
NC_049048.1_cds_YP_009865905.1_55	0.172	0.3118	0.4286	0.3763	46.48	0.525	0.459
NC_049048.1_cds_YP_009865907.1_57	0.4242	0.2222	0.411	0.3623	52.45	0.395	0.363
NC_049048.1_cds_YP_009865908.1_58	0.2222	0.2469	0.3875	0.4507	52.52	0.515	0.409
NC_049048.1_cds_YP_009865909.1_59	0.2283	0.3152	0.4783	0.3488	59.17	0.476	0.45
NC_049048.1_cds_YP_009865910.1_60	0.4161	0.2174	0.4748	0.2344	35.71	0.328	0.343
NC_049048.1_cds_YP_009865912.1_62	0.3096	0.2843	0.3687	0.3415	59.06	0.469	0.461
NC_049048.1_cds_YP_009865914.1_64	0.4471	0.2034	0.3971	0.2669	52.55	0.34	0.375
NC_049048.1_cds_YP_009865915.1_65	0.4296	0.2136	0.4164	0.1355	49.46	0.284	0.378
NC_049048.1_cds_YP_009865916.1_66	0.3016	0.3016	0.3874	0.28	38.68	0.449	0.416
NC_049048.1_cds_YP_009865917.1_67	0.3667	0.275	0.3056	0.2857	50.98	0.442	0.498
NC_049048.1_cds_YP_009865918.1_68	0.547	0.1129	0.4305	0.1429	43.27	0.191	0.312
NC_049048.1_cds_YP_009865920.1_70	0.4937	0.1435	0.4197	0.2364	48.74	0.269	0.33
NC_049048.1_cds_YP_009865921.1_71	0.4273	0.1686	0.4481	0.1628	46.54	0.259	0.353
NC_049048.1_cds_YP_009865923.1_73	0.5513	0.2564	0.3333	0.2222	43.59	0.333	0.344
NC_049048.1_cds_YP_009865924.1_74	0.4906	0.1195	0.4296	0.1339	44.03	0.2	0.345
NC_049048.1_cds_YP_009865925.1_75	0.5407	0.1407	0.4955	0.117	46.92	0.19	0.337
NC_049048.1_cds_YP_009865926.1_76	0.4732	0.1073	0.4877	0.1189	43.14	0.179	0.331
NC_049048.1_cds_YP_009865927.1_77	0.4852	0.118	0.5017	0.1579	49.22	0.204	0.375
NC_049048.1_cds_YP_009865929.1_79	0.3684	0.2219	0.5278	0.2421	50.43	0.322	0.3
NC_049048.1_cds_YP_009865930.1_80	0.4167	0.1417	0.5271	0.1186	46.53	0.208	0.406
NC_049048.1_cds_YP_009865931.1_81	0.4296	0.2136	0.4164	0.1355	49.46	0.284	0.378
NC_049048.1_cds_YP_009865932.1_82	0.3456	0.2626	0.4017	0.2677	53.88	0.396	0.384
NC_049048.1_cds_YP_009865934.1_84	0.1968	0.2713	0.4271	0.3667	57.94	0.49	0.456
NC_049049.1_cds_YP_009865935.1_1	0.3021	0.3125	0.358	0.3158	61	0.482	0.466
NC_049049.1_cds_YP_009865936.1_2	0.2979	0.2092	0.3095	0.359	57.42	0.469	0.433
NC_049049.1_cds_YP_009865937.1_3	0.5248	0.1655	0.4085	0.2124	49.2	0.269	0.317
NC_049049.1_cds_YP_009865938.1_4	0.3333	0.2984	0.3483	0.2574	52.63	0.446	0.459
NC_049049.1_cds_YP_009865939.1_5	0.2349	0.2771	0.3324	0.4381	52.54	0.545	0.439
NC_049049.1_cds_YP_009865940.1_6	0.4286	0.2959	0.3714	0.2353	51.14	0.398	0.411
NC_049049.1_cds_YP_009865941.1_7	0.505	0.1089	0.4483	0.1408	44.46	0.189	0.347
NC_049049.1_cds_YP_009865942.1_8	0.4693	0.1676	0.4494	0.1389	49.24	0.244	0.393
NC_049049.1_cds_YP_009865943.1_9	0.4919	0.1452	0.4821	0.1531	48.08	0.223	0.382
NC_049049.1_cds_YP_009865944.1_10	0.4935	0.1494	0.4512	0.16	45.55	0.239	0.378
NC_049049.1_cds_YP_009865945.1_11	0.4962	0.1654	0.4407	0.2059	51.5	0.267	0.389
NC_049049.1_cds_YP_009865946.1_12	0.3892	0.2816	0.3348	0.2391	52.91	0.41	0.436
NC_049049.1_cds_YP_009865947.1_13	0.3799	0.2845	0.3467	0.2298	48.56	0.408	0.419
NC_049049.1_cds_YP_009865948.1_14	0.4156	0.0649	0.5185	0.2237	43.08	0.229	0.397
NC_049049.1_cds_YP_009865950.1_16	0.3333	0.2465	0.2402	0.3967	57.87	0.512	0.457
NC_049049.1_cds_YP_009865951.1_17	0.3659	0.2391	0.2336	0.3973	59.55	0.495	0.435
NC_049049.1_cds_YP_009865954.1_20	0.4531	0.1362	0.454	0.2196	49.22	0.265	0.386
NC_049049.1_cds_YP_009865955.1_21	0.3917	0.209	0.4114	0.2576	53.42	0.354	0.386
NC_049049.1_cds_YP_009865956.1_22	0.334	0.257	0.449	0.3025	54.67	0.397	0.359
NC_049049.1_cds_YP_009865957.1_23	0.4895	0.1632	0.4425	0.1611	46.71	0.244	0.366
NC_049049.1_cds_YP_009865958.1_24	0.4764	0.1604	0.4352	0.1183	42.47	0.226	0.363
NC_049049.1_cds_YP_009865960.1_26	0.4126	0.1818	0.4472	0.2672	47.62	0.333	0.381
NC_049049.1_cds_YP_009865961.1_27	0.257	0.2654	0.3284	0.4405	59.69	0.533	0.43
NC_049049.1_cds_YP_009865965.1_31	0.4029	0.229	0.4613	0.2442	51.19	0.345	0.365
NC_049049.1_cds_YP_009865967.1_33	0.3933	0.2333	0.3692	0.265	52.55	0.382	0.383
NC_049049.1_cds_YP_009865968.1_34	0.4863	0.2077	0.4348	0.175	53.57	0.284	0.341
NC_049049.1_cds_YP_009865969.1_35	0.5078	0.1445	0.3682	0.2325	47	0.286	0.4
NC_049049.1_cds_YP_009865978.1_44	0.5128	0.1154	0.4318	0.1795	37.66	0.228	0.34
NC_049049.1_cds_YP_009865979.1_45	0.2588	0.2471	0.5581	0.2254	36.26	0.346	0.343
NC_049049.1_cds_YP_009865980.1_46	0.3021	0.3125	0.358	0.3158	61	0.482	0.466
NC_049049.1_cds_YP_009865981.1_47	0.2536	0.2971	0.3228	0.4828	51.89	0.561	0.428
NC_049049.1_cds_YP_009865982.1_48	0.4966	0.1632	0.371	0.1623	48.88	0.264	0.44
NC_049049.1_cds_YP_009865986.1_52	0.4368	0.2684	0.252	0.2844	47.45	0.418	0.41
NC_049049.1_cds_YP_009865987.1_53	0.4737	0.3158	0.2157	0.1724	37.95	0.401	0.392
NC_049049.1_cds_YP_009865988.1_54	0.2882	0.2707	0.4879	0.3011	51.05	0.408	0.344
NC_049049.1_cds_YP_009865989.1_55	0.172	0.3118	0.4343	0.3723	46.55	0.52	0.458
NC_049049.1_cds_YP_009865991.1_57	0.4242	0.2222	0.411	0.3623	52.45	0.395	0.363
NC_049049.1_cds_YP_009865992.1_58	0.2346	0.2469	0.375	0.4507	52.87	0.515	0.412
NC_049049.1_cds_YP_009865993.1_59	0.2283	0.3152	0.4783	0.3488	59.17	0.476	0.45
NC_049049.1_cds_YP_009865994.1_60	0.4125	0.2125	0.4786	0.2403	36.61	0.328	0.342
NC_049049.1_cds_YP_009865996.1_62	0.3077	0.2821	0.375	0.3416	59.63	0.466	0.459
NC_049049.1_cds_YP_009865998.1_64	0.4455	0.2042	0.3979	0.2665	52.64	0.341	0.375
NC_049049.1_cds_YP_009865999.1_65	0.4296	0.2113	0.4219	0.1323	49.25	0.28	0.377
NC_049049.1_cds_YP_009866000.1_66	0.3016	0.3016	0.3874	0.28	38.68	0.449	0.416
NC_049049.1_cds_YP_009866001.1_67	0.3667	0.275	0.3056	0.2857	50.98	0.442	0.498
NC_049049.1_cds_YP_009866002.1_68	0.5336	0.1186	0.4565	0.1352	43.34	0.19	0.312
NC_049049.1_cds_YP_009866004.1_70	0.4937	0.1435	0.4227	0.2289	48.42	0.266	0.329
NC_049049.1_cds_YP_009866005.1_71	0.4306	0.1644	0.4496	0.1623	45.34	0.255	0.351
NC_049049.1_cds_YP_009866007.1_73	0.5513	0.2564	0.3333	0.2222	42.69	0.333	0.341
NC_049049.1_cds_YP_009866008.1_74	0.4906	0.1195	0.4222	0.1429	43.65	0.206	0.347
NC_049049.1_cds_YP_009866009.1_75	0.5407	0.1333	0.5135	0.1064	44.54	0.177	0.331
NC_049049.1_cds_YP_009866010.1_76	0.4669	0.1136	0.4877	0.1198	43.23	0.185	0.331
NC_049049.1_cds_YP_009866011.1_77	0.4852	0.1115	0.5052	0.1619	49.12	0.202	0.374
NC_049049.1_cds_YP_009866013.1_79	0.3666	0.2215	0.5336	0.2393	51.29	0.319	0.3
NC_049049.1_cds_YP_009866014.1_80	0.4167	0.1417	0.5271	0.1186	46.53	0.208	0.406
NC_049049.1_cds_YP_009866015.1_81	0.4296	0.2113	0.4219	0.1323	49.25	0.28	0.377
NC_049049.1_cds_YP_009866016.1_82	0.3448	0.2624	0.4032	0.2681	54	0.396	0.384
NC_049049.1_cds_YP_009866018.1_84	0.1989	0.2742	0.4264	0.3652	57.96	0.489	0.454
NC_049050.1_cds_YP_009866019.1_1	0.3021	0.3125	0.358	0.3158	61	0.482	0.466
NC_049050.1_cds_YP_009866020.1_2	0.2979	0.2092	0.3108	0.3605	57.42	0.469	0.432
NC_049050.1_cds_YP_009866021.1_3	0.5237	0.1659	0.4068	0.2157	49.65	0.271	0.317
NC_049050.1_cds_YP_009866022.1_4	0.3315	0.2965	0.3562	0.2518	52.61	0.441	0.457
NC_049050.1_cds_YP_009866023.1_5	0.2356	0.2779	0.3304	0.4395	53.1	0.546	0.437
NC_049050.1_cds_YP_009866024.1_6	0.4286	0.2959	0.3714	0.2353	51.14	0.398	0.411
NC_049050.1_cds_YP_009866025.1_7	0.505	0.1089	0.4483	0.1408	44.88	0.189	0.35
NC_049050.1_cds_YP_009866026.1_8	0.4722	0.1667	0.4487	0.1408	47.67	0.244	0.393
NC_049050.1_cds_YP_009866027.1_9	0.4919	0.1452	0.4821	0.1531	48.08	0.223	0.382
NC_049050.1_cds_YP_009866028.1_10	0.4935	0.1494	0.4573	0.1533	45.4	0.234	0.375
NC_049050.1_cds_YP_009866029.1_11	0.4925	0.1716	0.437	0.2039	50.51	0.272	0.393
NC_049050.1_cds_YP_009866030.1_12	0.3892	0.2816	0.3355	0.2397	52.89	0.41	0.435
NC_049050.1_cds_YP_009866031.1_13	0.3806	0.285	0.3474	0.2279	48.81	0.407	0.42
NC_049050.1_cds_YP_009866032.1_14	0.4156	0.0649	0.5185	0.2237	41.13	0.229	0.393
NC_049050.1_cds_YP_009866034.1_16	0.3333	0.2465	0.241	0.396	57.08	0.511	0.458
NC_049050.1_cds_YP_009866035.1_17	0.3659	0.2391	0.2336	0.3973	58.7	0.495	0.435
NC_049050.1_cds_YP_009866038.1_20	0.4536	0.134	0.4534	0.2221	49.28	0.265	0.386
NC_049050.1_cds_YP_009866039.1_21	0.3887	0.2113	0.4114	0.2576	53.52	0.356	0.387
NC_049050.1_cds_YP_009866040.1_22	0.3333	0.2583	0.4494	0.3011	54.81	0.397	0.36
NC_049050.1_cds_YP_009866041.1_23	0.4895	0.1632	0.4483	0.1544	46.58	0.24	0.364
NC_049050.1_cds_YP_009866042.1_24	0.4717	0.1698	0.4352	0.1124	42.35	0.23	0.364
NC_049050.1_cds_YP_009866044.1_26	0.4126	0.1818	0.4472	0.2672	47.62	0.333	0.381
NC_049050.1_cds_YP_009866045.1_27	0.2563	0.2646	0.3294	0.4419	59.48	0.533	0.43
NC_049050.1_cds_YP_009866049.1_31	0.407	0.2297	0.464	0.246	51.94	0.344	0.363
NC_049050.1_cds_YP_009866051.1_33	0.3933	0.2333	0.3692	0.265	52.55	0.382	0.383
NC_049050.1_cds_YP_009866052.1_34	0.4863	0.2077	0.4317	0.1736	53.33	0.284	0.343
NC_049050.1_cds_YP_009866053.1_35	0.5039	0.1484	0.3682	0.2325	47	0.289	0.401
NC_049050.1_cds_YP_009866062.1_44	0.5128	0.1154	0.4318	0.1795	37.66	0.228	0.34
NC_049050.1_cds_YP_009866063.1_45	0.2588	0.2471	0.5581	0.2254	36.26	0.346	0.343
NC_049050.1_cds_YP_009866064.1_46	0.3021	0.3125	0.358	0.3158	61	0.482	0.466
NC_049050.1_cds_YP_009866065.1_47	0.2482	0.2993	0.3175	0.487	51.98	0.567	0.433
NC_049050.1_cds_YP_009866066.1_48	0.4966	0.1632	0.3683	0.1657	49.07	0.266	0.44
NC_049050.1_cds_YP_009866070.1_52	0.4421	0.2632	0.252	0.2844	47.76	0.413	0.406
NC_049050.1_cds_YP_009866071.1_53	0.4737	0.3158	0.2079	0.1744	38.92	0.404	0.392
NC_049050.1_cds_YP_009866072.1_54	0.2926	0.2664	0.4783	0.3125	51.16	0.411	0.344
NC_049050.1_cds_YP_009866073.1_55	0.172	0.3118	0.4343	0.3723	46.55	0.52	0.458
NC_049050.1_cds_YP_009866075.1_57	0.4343	0.2121	0.411	0.3623	52.45	0.387	0.361
NC_049050.1_cds_YP_009866076.1_58	0.2222	0.2469	0.3875	0.4507	52.33	0.515	0.412
NC_049050.1_cds_YP_009866077.1_59	0.2283	0.3152	0.4783	0.3488	60.72	0.476	0.45
NC_049050.1_cds_YP_009866078.1_60	0.4151	0.2138	0.4748	0.2422	36.5	0.33	0.34
NC_049050.1_cds_YP_009866080.1_62	0.3077	0.2821	0.3714	0.3438	59.73	0.468	0.46
NC_049050.1_cds_YP_009866082.1_64	0.4464	0.203	0.3984	0.2669	52.53	0.34	0.375
NC_049050.1_cds_YP_009866083.1_65	0.4296	0.2113	0.4192	0.1355	49.36	0.282	0.377
NC_049050.1_cds_YP_009866084.1_66	0.3016	0.3016	0.3874	0.28	38.68	0.449	0.416
NC_049050.1_cds_YP_009866085.1_67	0.3667	0.275	0.3056	0.2857	50.98	0.442	0.498
NC_049050.1_cds_YP_009866086.1_68	0.5423	0.1176	0.4349	0.1441	42.83	0.195	0.312
NC_049050.1_cds_YP_009866088.1_70	0.5021	0.1362	0.4227	0.2242	46.25	0.257	0.325
NC_049050.1_cds_YP_009866089.1_71	0.4249	0.1732	0.4521	0.1572	46.25	0.259	0.353
NC_049050.1_cds_YP_009866091.1_73	0.5513	0.2564	0.3333	0.2222	42.69	0.333	0.341
NC_049050.1_cds_YP_009866092.1_74	0.4906	0.1195	0.4222	0.1429	44.13	0.206	0.347
NC_049050.1_cds_YP_009866093.1_75	0.5294	0.1324	0.4909	0.1522	46.1	0.203	0.339
NC_049050.1_cds_YP_009866094.1_76	0.4686	0.1069	0.4878	0.1224	43.59	0.181	0.332
NC_049050.1_cds_YP_009866095.1_77	0.482	0.1148	0.5052	0.1613	49.01	0.204	0.376
NC_049050.1_cds_YP_009866097.1_79	0.3692	0.222	0.5288	0.2397	52.03	0.32	0.302
NC_049050.1_cds_YP_009866098.1_80	0.4167	0.1417	0.5271	0.1186	46.53	0.208	0.406
NC_049050.1_cds_YP_009866099.1_81	0.4296	0.2113	0.4192	0.1355	49.36	0.282	0.377
NC_049050.1_cds_YP_009866100.1_82	0.3456	0.2626	0.4021	0.2687	53.91	0.396	0.384
NC_049050.1_cds_YP_009866102.1_84	0.1989	0.2742	0.4264	0.3672	57.96	0.489	0.453
NC_053827.1_cds_YP_010029669.1_1	0.3021	0.3125	0.358	0.3158	61	0.482	0.466
NC_053827.1_cds_YP_010029670.1_2	0.2989	0.2135	0.3068	0.3547	56.84	0.47	0.434
NC_053827.1_cds_YP_010029671.1_3	0.5248	0.1608	0.4217	0.2072	49.27	0.261	0.315
NC_053827.1_cds_YP_010029672.1_4	0.3315	0.2992	0.3515	0.2473	52.21	0.442	0.46
NC_053827.1_cds_YP_010029673.1_5	0.2356	0.2779	0.3382	0.4317	53.39	0.54	0.437
NC_053827.1_cds_YP_010029674.1_6	0.4286	0.2959	0.3857	0.2206	47.12	0.389	0.414
NC_053827.1_cds_YP_010029675.1_7	0.505	0.1089	0.4483	0.1408	44.88	0.189	0.35
NC_053827.1_cds_YP_010029676.1_8	0.4833	0.1667	0.4359	0.1408	48.56	0.244	0.391
NC_053827.1_cds_YP_010029677.1_9	0.4959	0.1626	0.4643	0.1531	48.23	0.236	0.384
NC_053827.1_cds_YP_010029678.1_10	0.487	0.1494	0.4606	0.1523	46.3	0.234	0.376
NC_053827.1_cds_YP_010029679.1_11	0.4887	0.1654	0.4407	0.2157	51.5	0.273	0.391
NC_053827.1_cds_YP_010029680.1_12	0.3899	0.2821	0.337	0.2379	53.05	0.409	0.434
NC_053827.1_cds_YP_010029681.1_13	0.3799	0.2829	0.3444	0.2323	48.75	0.409	0.422
NC_053827.1_cds_YP_010029682.1_14	0.4156	0.0649	0.5185	0.2237	40.34	0.229	0.39
NC_053827.1_cds_YP_010029684.1_16	0.3343	0.2472	0.2424	0.3974	58.46	0.511	0.455
NC_053827.1_cds_YP_010029685.1_17	0.3646	0.2383	0.2327	0.3956	55.03	0.495	0.436
NC_053827.1_cds_YP_010029688.1_20	0.4536	0.1269	0.4595	0.2241	48.94	0.261	0.385
NC_053827.1_cds_YP_010029689.1_21	0.3898	0.2109	0.4114	0.2576	52.81	0.355	0.386
NC_053827.1_cds_YP_010029690.1_22	0.3299	0.2591	0.4489	0.3024	54.45	0.399	0.36
NC_053827.1_cds_YP_010029691.1_23	0.4764	0.1675	0.4593	0.1544	49.78	0.244	0.367
NC_053827.1_cds_YP_010029692.1_24	0.4834	0.1611	0.4427	0.1012	41.77	0.214	0.36
NC_053827.1_cds_YP_010029694.1_26	0.4214	0.1786	0.4508	0.2522	45.53	0.321	0.378
NC_053827.1_cds_YP_010029695.1_27	0.2535	0.2674	0.3264	0.4405	59.32	0.537	0.434
NC_053827.1_cds_YP_010029699.1_31	0.4159	0.2271	0.4582	0.244	51.71	0.341	0.363
NC_053827.1_cds_YP_010029701.1_33	0.396	0.2349	0.3643	0.2696	53.53	0.384	0.383
NC_053827.1_cds_YP_010029702.1_34	0.3616	0.2486	0.4067	0.2441	59.25	0.375	0.349
NC_053827.1_cds_YP_010029703.1_35	0.5058	0.1401	0.3643	0.2423	47.76	0.289	0.399
NC_053827.1_cds_YP_010029713.1_45	0.2558	0.2558	0.5647	0.2286	36.94	0.352	0.348
NC_053827.1_cds_YP_010029714.1_46	0.3021	0.3125	0.358	0.3158	61	0.482	0.466
NC_053827.1_cds_YP_010029715.1_47	0.2555	0.2993	0.3228	0.4828	51.74	0.561	0.427
NC_053827.1_cds_YP_010029716.1_48	0.5	0.1613	0.3656	0.1681	48.99	0.266	0.44
NC_053827.1_cds_YP_010029720.1_52	0.4368	0.2684	0.252	0.2844	47.58	0.418	0.408
NC_053827.1_cds_YP_010029721.1_53	0.4737	0.3158	0.2178	0.1744	40.45	0.401	0.392
NC_053827.1_cds_YP_010029722.1_54	0.2895	0.2675	0.4783	0.3125	50.69	0.413	0.345
NC_053827.1_cds_YP_010029723.1_55	0.172	0.3118	0.4343	0.3723	47.13	0.52	0.461
NC_053827.1_cds_YP_010029725.1_57	0.42	0.22	0.411	0.3768	53.75	0.4	0.363
NC_053827.1_cds_YP_010029726.1_58	0.2222	0.2469	0.3875	0.4507	50.45	0.515	0.409
NC_053827.1_cds_YP_010029727.1_59	0.3119	0.3028	0.2447	0.4048	50.97	0.54	0.46
NC_053827.1_cds_YP_010029728.1_60	0.4136	0.2099	0.4786	0.2403	36.42	0.327	0.342
NC_053827.1_cds_YP_010029730.1_62	0.3096	0.2843	0.3672	0.3395	60	0.468	0.462
NC_053827.1_cds_YP_010029732.1_64	0.4143	0.2399	0.4253	0.2003	50.25	0.334	0.387
NC_053827.1_cds_YP_010029733.1_65	0.4272	0.2113	0.4192	0.1387	49.44	0.284	0.379
NC_053827.1_cds_YP_010029734.1_66	0.3016	0.3016	0.3874	0.28	37.55	0.449	0.418
NC_053827.1_cds_YP_010029735.1_67	0.4934	0.1454	0.5548	0.1738	46.98	0.22	0.285
NC_053827.1_cds_YP_010029737.1_69	0.4254	0.1905	0.3868	0.2748	47.99	0.347	0.382
NC_053827.1_cds_YP_010029738.1_70	0.4732	0.1073	0.4912	0.1152	43.07	0.176	0.33
NC_053827.1_cds_YP_010029739.1_71	0.4063	0.2188	0.383	0.3171	53.07	0.38	0.347
NC_053827.1_cds_YP_010029740.1_72	0.5159	0.2484	0.3053	0.2073	51.52	0.337	0.349
NC_053827.1_cds_YP_010029741.1_73	0.5513	0.2564	0.3333	0.2222	42.69	0.333	0.341
NC_053827.1_cds_YP_010029743.1_75	0.4841	0.2568	0.2968	0.2395	52.91	0.364	0.36
NC_053827.1_cds_YP_010029744.1_76	0.4868	0.2528	0.3616	0.2603	43.4	0.352	0.311
NC_053827.1_cds_YP_010029746.1_78	0.5139	0.2471	0.3478	0.1978	50.17	0.326	0.32
NC_053827.1_cds_YP_010029747.1_79	0.4167	0.1417	0.5271	0.1186	47.46	0.208	0.409
NC_053827.1_cds_YP_010029748.1_80	0.4272	0.2113	0.4192	0.1387	49.44	0.284	0.379
NC_053827.1_cds_YP_010029749.1_81	0.3454	0.2624	0.402	0.2694	53.88	0.396	0.383
NC_053827.1_cds_YP_010029751.1_83	0.1979	0.2727	0.4242	0.3708	58.04	0.492	0.455
NC_058536.1_cds_YP_010188283.1_1	0.3021	0.3125	0.358	0.3158	61	0.482	0.466
NC_058536.1_cds_YP_010188284.1_2	0.2989	0.2135	0.3068	0.3562	57	0.47	0.433
NC_058536.1_cds_YP_010188285.1_3	0.5201	0.1726	0.4167	0.2093	50.1	0.271	0.319
NC_058536.1_cds_YP_010188286.1_4	0.3306	0.2984	0.3537	0.2464	52.7	0.441	0.459
NC_058536.1_cds_YP_010188287.1_5	0.2319	0.2831	0.3353	0.4349	53.2	0.546	0.439
NC_058536.1_cds_YP_010188288.1_6	0.4286	0.2959	0.3803	0.2174	49.26	0.389	0.414
NC_058536.1_cds_YP_010188289.1_7	0.505	0.1287	0.4419	0.1286	45.2	0.198	0.353
NC_058536.1_cds_YP_010188290.1_8	0.4833	0.1667	0.4359	0.1408	48.56	0.244	0.391
NC_058536.1_cds_YP_010188291.1_9	0.5041	0.1545	0.4732	0.1429	47.72	0.223	0.38
NC_058536.1_cds_YP_010188292.1_10	0.4837	0.1503	0.4667	0.1523	46.63	0.234	0.375
NC_058536.1_cds_YP_010188293.1_11	0.4812	0.1654	0.4492	0.2157	53.72	0.273	0.389
NC_058536.1_cds_YP_010188294.1_12	0.3899	0.2821	0.337	0.2384	53.14	0.409	0.434
NC_058536.1_cds_YP_010188295.1_13	0.3799	0.2829	0.3467	0.2334	48.62	0.408	0.421
NC_058536.1_cds_YP_010188296.1_14	0.4156	0.0649	0.5185	0.2237	40.1	0.229	0.387
NC_058536.1_cds_YP_010188298.1_16	0.3371	0.2444	0.2424	0.3974	58.18	0.509	0.454
NC_058536.1_cds_YP_010188299.1_17	0.3659	0.2391	0.2327	0.3956	57.69	0.495	0.435
NC_058536.1_cds_YP_010188302.1_20	0.4531	0.1279	0.4572	0.2245	49.14	0.262	0.386
NC_058536.1_cds_YP_010188303.1_21	0.3891	0.2105	0.4127	0.2544	52.72	0.354	0.387
NC_058536.1_cds_YP_010188304.1_22	0.3319	0.2601	0.4484	0.3008	54.34	0.399	0.36
NC_058536.1_cds_YP_010188305.1_23	0.4764	0.1675	0.4593	0.1554	49.67	0.244	0.364
NC_058536.1_cds_YP_010188306.1_24	0.4787	0.1564	0.4479	0.1071	42.05	0.214	0.359
NC_058536.1_cds_YP_010188308.1_26	0.4126	0.1748	0.4516	0.2564	45.74	0.324	0.378
NC_058536.1_cds_YP_010188309.1_27	0.2542	0.2654	0.3294	0.4419	59.41	0.535	0.433
NC_058536.1_cds_YP_010188313.1_31	0.4123	0.231	0.4599	0.244	51.75	0.344	0.365
NC_058536.1_cds_YP_010188315.1_33	0.396	0.2349	0.3643	0.2696	53.53	0.384	0.383
NC_058536.1_cds_YP_010188316.1_34	0.4863	0.2077	0.4397	0.1613	53.75	0.278	0.347
NC_058536.1_cds_YP_010188317.1_35	0.5097	0.144	0.3619	0.2389	47.36	0.289	0.4
NC_058536.1_cds_YP_010188326.1_44	0.4935	0.1169	0.4368	0.1923	47.8	0.24	0.346
NC_058536.1_cds_YP_010188327.1_45	0.2529	0.2529	0.5714	0.2174	37.2	0.346	0.349
NC_058536.1_cds_YP_010188328.1_46	0.3021	0.3125	0.358	0.3158	61	0.482	0.466
NC_058536.1_cds_YP_010188329.1_47	0.2536	0.2971	0.3228	0.4828	51.89	0.561	0.428
NC_058536.1_cds_YP_010188330.1_48	0.4954	0.1659	0.3602	0.1739	48.91	0.274	0.443
NC_058536.1_cds_YP_010188334.1_52	0.4368	0.2684	0.252	0.2844	47.44	0.418	0.411
NC_058536.1_cds_YP_010188335.1_53	0.4701	0.3134	0.2255	0.1724	41.19	0.399	0.394
NC_058536.1_cds_YP_010188336.1_54	0.2915	0.2735	0.4826	0.3023	50.77	0.411	0.345
NC_058536.1_cds_YP_010188337.1_55	0.1684	0.3053	0.43	0.3789	47.17	0.524	0.466
NC_058536.1_cds_YP_010188339.1_57	0.42	0.22	0.4167	0.3824	52.79	0.4	0.363
NC_058536.1_cds_YP_010188340.1_58	0.2222	0.2469	0.3875	0.4507	52.87	0.515	0.415
NC_058536.1_cds_YP_010188341.1_59	0.2258	0.3118	0.4783	0.3488	58.53	0.476	0.452
NC_058536.1_cds_YP_010188342.1_60	0.4136	0.2099	0.4786	0.2403	36.32	0.327	0.34
NC_058536.1_cds_YP_010188344.1_62	0.3096	0.2843	0.3708	0.3374	60.5	0.466	0.461
NC_058536.1_cds_YP_010188346.1_64	0.4474	0.2027	0.3989	0.2657	52.49	0.339	0.375
NC_058536.1_cds_YP_010188347.1_65	0.4296	0.2113	0.4192	0.1355	49.36	0.282	0.377
NC_058536.1_cds_YP_010188348.1_66	0.3016	0.3016	0.3874	0.28	37.55	0.449	0.418
NC_058536.1_cds_YP_010188349.1_67	0.5512	0.1087	0.4335	0.1422	42.76	0.187	0.31
NC_058536.1_cds_YP_010188351.1_69	0.4916	0.1513	0.4167	0.2331	49.67	0.273	0.332
NC_058536.1_cds_YP_010188352.1_70	0.4213	0.1736	0.4414	0.1689	47.06	0.268	0.358
NC_058536.1_cds_YP_010188354.1_72	0.5513	0.2564	0.3333	0.2222	44.01	0.333	0.341
NC_058536.1_cds_YP_010188355.1_73	0.4906	0.1258	0.4148	0.1429	46.45	0.212	0.348
NC_058536.1_cds_YP_010188356.1_74	0.5373	0.1418	0.4955	0.1277	46.95	0.196	0.339
NC_058536.1_cds_YP_010188357.1_75	0.4652	0.1108	0.4965	0.1148	43.16	0.179	0.331
NC_058536.1_cds_YP_010188358.1_76	0.4885	0.1148	0.4965	0.1626	48.87	0.204	0.374
NC_058536.1_cds_YP_010188360.1_78	0.3682	0.2172	0.5353	0.2425	51.15	0.317	0.298
NC_058536.1_cds_YP_010188361.1_79	0.4167	0.1417	0.5271	0.1186	47.46	0.208	0.409
NC_058536.1_cds_YP_010188362.1_80	0.4296	0.2113	0.4192	0.1355	49.36	0.282	0.377
NC_058536.1_cds_YP_010188363.1_81	0.3448	0.2624	0.4025	0.2695	53.94	0.397	0.384
NC_058536.1_cds_YP_010188365.1_83	0.1979	0.2727	0.4242	0.3687	57.85	0.492	0.456
NC_058537.1_cds_YP_010188366.1_1	0.3021	0.3125	0.358	0.3158	61	0.482	0.466
NC_058537.1_cds_YP_010188367.1_2	0.2989	0.21	0.3108	0.3562	56.99	0.467	0.432
NC_058537.1_cds_YP_010188368.1_3	0.5248	0.1702	0.4074	0.2112	49.46	0.271	0.318
NC_058537.1_cds_YP_010188369.1_4	0.3306	0.2984	0.3527	0.2518	52.72	0.443	0.459
NC_058537.1_cds_YP_010188370.1_5	0.2335	0.2754	0.3343	0.4367	52.4	0.544	0.437
NC_058537.1_cds_YP_010188371.1_6	0.4286	0.2959	0.3714	0.2353	51.14	0.398	0.411
NC_058537.1_cds_YP_010188372.1_7	0.505	0.1089	0.4483	0.1408	44.88	0.189	0.35
NC_058537.1_cds_YP_010188373.1_8	0.4667	0.1667	0.4679	0.1268	48.84	0.234	0.387
NC_058537.1_cds_YP_010188374.1_9	0.4919	0.1532	0.4643	0.1633	49.08	0.236	0.386
NC_058537.1_cds_YP_010188375.1_10	0.4935	0.1494	0.4601	0.1554	46.19	0.234	0.371
NC_058537.1_cds_YP_010188376.1_11	0.4887	0.1654	0.4407	0.2157	51.5	0.273	0.391
NC_058537.1_cds_YP_010188377.1_12	0.3905	0.2825	0.3363	0.236	52.77	0.408	0.435
NC_058537.1_cds_YP_010188378.1_13	0.3806	0.285	0.3474	0.2285	48.72	0.407	0.419
NC_058537.1_cds_YP_010188379.1_14	0.4156	0.0649	0.5185	0.2237	40.91	0.229	0.39
NC_058537.1_cds_YP_010188381.1_16	0.3352	0.2479	0.2401	0.3987	57.88	0.512	0.456
NC_058537.1_cds_YP_010188382.1_17	0.3659	0.2391	0.2336	0.3973	57.73	0.495	0.433
NC_058537.1_cds_YP_010188385.1_20	0.4512	0.1375	0.4565	0.2163	49.2	0.264	0.385
NC_058537.1_cds_YP_010188386.1_21	0.391	0.2105	0.4087	0.2589	53.52	0.356	0.386
NC_058537.1_cds_YP_010188387.1_22	0.334	0.2607	0.4456	0.302	54.88	0.4	0.361
NC_058537.1_cds_YP_010188388.1_23	0.4895	0.1632	0.4483	0.1544	46.94	0.24	0.367
NC_058537.1_cds_YP_010188389.1_24	0.4717	0.1651	0.4404	0.1124	42.23	0.226	0.363
NC_058537.1_cds_YP_010188391.1_26	0.4255	0.1702	0.4553	0.25	45.44	0.314	0.374
NC_058537.1_cds_YP_010188392.1_27	0.2563	0.2646	0.3294	0.4434	58.93	0.533	0.43
NC_058537.1_cds_YP_010188395.1_30	0.4076	0.2346	0.4591	0.248	51.38	0.348	0.363
NC_058537.1_cds_YP_010188397.1_32	0.3933	0.2333	0.3692	0.265	52.55	0.382	0.383
NC_058537.1_cds_YP_010188398.1_33	0.4863	0.2077	0.4388	0.1653	53.06	0.279	0.341
NC_058537.1_cds_YP_010188399.1_34	0.5078	0.1406	0.3643	0.2412	47.1	0.289	0.401
NC_058537.1_cds_YP_010188408.1_43	0.5341	0.0909	0.4227	0.186	37.61	0.214	0.325
NC_058537.1_cds_YP_010188409.1_44	0.2558	0.2558	0.5529	0.2286	36.39	0.355	0.346
NC_058537.1_cds_YP_010188410.1_45	0.3021	0.3125	0.358	0.3158	61	0.482	0.466
NC_058537.1_cds_YP_010188411.1_46	0.2609	0.2971	0.3175	0.487	51.78	0.561	0.428
NC_058537.1_cds_YP_010188412.1_47	0.4943	0.1632	0.371	0.1652	49.36	0.266	0.441
NC_058537.1_cds_YP_010188416.1_51	0.4368	0.2684	0.252	0.2844	47.45	0.418	0.41
NC_058537.1_cds_YP_010188417.1_52	0.4737	0.3158	0.2079	0.1744	39.63	0.404	0.395
NC_058537.1_cds_YP_010188418.1_53	0.2907	0.2731	0.4757	0.3125	52.27	0.416	0.346
NC_058537.1_cds_YP_010188419.1_54	0.172	0.3118	0.4343	0.3723	48.05	0.52	0.461
NC_058537.1_cds_YP_010188421.1_56	0.4242	0.2222	0.411	0.3623	52.45	0.395	0.363
NC_058537.1_cds_YP_010188422.1_57	0.2222	0.2469	0.3875	0.4507	53.8	0.515	0.412
NC_058537.1_cds_YP_010188423.1_58	0.2283	0.3152	0.4783	0.3488	59.17	0.476	0.45
NC_058537.1_cds_YP_010188424.1_59	0.425	0.2062	0.4818	0.2381	35.74	0.32	0.337
NC_058537.1_cds_YP_010188426.1_61	0.3096	0.2843	0.3672	0.3395	60	0.468	0.462
NC_058537.1_cds_YP_010188428.1_63	0.4461	0.2026	0.3987	0.2672	52.64	0.34	0.375
NC_058537.1_cds_YP_010188429.1_64	0.4296	0.2113	0.4192	0.1355	49.36	0.282	0.377
NC_058537.1_cds_YP_010188430.1_65	0.3016	0.3016	0.3874	0.28	38.68	0.449	0.416
NC_058537.1_cds_YP_010188431.1_66	0.5459	0.1182	0.433	0.1419	43.45	0.194	0.31
NC_058537.1_cds_YP_010188433.1_68	0.4915	0.1441	0.4227	0.2424	49.51	0.272	0.328
NC_058537.1_cds_YP_010188434.1_69	0.4249	0.1709	0.4481	0.1633	46.54	0.261	0.354
NC_058537.1_cds_YP_010188436.1_71	0.5513	0.2564	0.3333	0.2222	42.69	0.333	0.341
NC_058537.1_cds_YP_010188437.1_72	0.4906	0.1195	0.4254	0.1441	43.71	0.206	0.343
NC_058537.1_cds_YP_010188438.1_73	0.5407	0.1333	0.4955	0.129	46.27	0.19	0.335
NC_058537.1_cds_YP_010188439.1_74	0.47	0.1104	0.4877	0.1193	43.36	0.182	0.332
NC_058537.1_cds_YP_010188440.1_75	0.482	0.1148	0.5035	0.1613	48.67	0.204	0.376
NC_058537.1_cds_YP_010188442.1_77	0.374	0.217	0.5302	0.2438	50.91	0.318	0.298
NC_058537.1_cds_YP_010188443.1_78	0.4167	0.1417	0.5271	0.1186	46.53	0.208	0.406
NC_058537.1_cds_YP_010188444.1_79	0.4296	0.2113	0.4192	0.1355	49.36	0.282	0.377
NC_058537.1_cds_YP_010188445.1_80	0.3458	0.2627	0.4022	0.2694	53.9	0.396	0.384
NC_058537.1_cds_YP_010188447.1_82	0.1979	0.2727	0.4242	0.3708	58.04	0.492	0.455
NC_058538.1_cds_YP_010188448.1_1	0.3021	0.3125	0.358	0.3158	61	0.482	0.466
NC_058538.1_cds_YP_010188449.1_2	0.2989	0.2135	0.3068	0.3562	57.25	0.47	0.432
NC_058538.1_cds_YP_010188450.1_3	0.5281	0.1742	0.4236	0.2024	52.45	0.265	0.315
NC_058538.1_cds_YP_010188451.1_4	0.3315	0.2992	0.3515	0.2473	52.67	0.442	0.46
NC_058538.1_cds_YP_010188452.1_5	0.2364	0.2788	0.3353	0.4349	53.31	0.543	0.437
NC_058538.1_cds_YP_010188453.1_6	0.4286	0.2959	0.3913	0.2239	47.24	0.389	0.408
NC_058538.1_cds_YP_010188454.1_7	0.505	0.1089	0.4483	0.1408	44.88	0.189	0.35
NC_058538.1_cds_YP_010188455.1_8	0.4889	0.1611	0.4359	0.1418	48.1	0.239	0.388
NC_058538.1_cds_YP_010188456.1_9	0.5041	0.1626	0.4554	0.1531	47.46	0.236	0.384
NC_058538.1_cds_YP_010188457.1_10	0.4839	0.1548	0.4573	0.1533	46.31	0.239	0.378
NC_058538.1_cds_YP_010188458.1_11	0.4887	0.1654	0.4407	0.2157	51.5	0.273	0.391
NC_058538.1_cds_YP_010188459.1_12	0.3899	0.2821	0.337	0.2379	53.12	0.409	0.434
NC_058538.1_cds_YP_010188460.1_13	0.3799	0.2829	0.3437	0.2317	48.8	0.409	0.422
NC_058538.1_cds_YP_010188461.1_14	0.4156	0.0649	0.5185	0.2237	40.1	0.229	0.387
NC_058538.1_cds_YP_010188463.1_16	0.3343	0.2472	0.2424	0.3974	58.46	0.511	0.455
NC_058538.1_cds_YP_010188464.1_17	0.3633	0.2374	0.2317	0.3982	56.17	0.497	0.436
NC_058538.1_cds_YP_010188467.1_20	0.4536	0.1281	0.4583	0.2234	49.07	0.262	0.385
NC_058538.1_cds_YP_010188468.1_21	0.3879	0.2128	0.4104	0.2569	53.06	0.357	0.386
NC_058538.1_cds_YP_010188469.1_22	0.3299	0.2624	0.4454	0.3037	54.4	0.403	0.362
NC_058538.1_cds_YP_010188470.1_23	0.4764	0.1675	0.4593	0.1544	49.78	0.244	0.367
NC_058538.1_cds_YP_010188471.1_24	0.4834	0.1611	0.4427	0.1012	41.77	0.214	0.36
NC_058538.1_cds_YP_010188473.1_26	0.4214	0.1786	0.459	0.2435	45.91	0.315	0.378
NC_058538.1_cds_YP_010188474.1_27	0.2535	0.2646	0.3314	0.4391	59.08	0.533	0.432
NC_058538.1_cds_YP_010188478.1_31	0.4147	0.2294	0.4562	0.245	52.48	0.343	0.364
NC_058538.1_cds_YP_010188480.1_33	0.396	0.2349	0.3643	0.2696	53.53	0.384	0.383
NC_058538.1_cds_YP_010188481.1_34	0.4863	0.2077	0.4388	0.1736	53.38	0.282	0.344
NC_058538.1_cds_YP_010188482.1_35	0.5058	0.1401	0.3658	0.2434	47.39	0.289	0.4
NC_058538.1_cds_YP_010188491.1_44	0.5	0.122	0.4457	0.1829	39.18	0.234	0.333
NC_058538.1_cds_YP_010188492.1_45	0.2558	0.2558	0.5714	0.2174	42.24	0.346	0.343
NC_058538.1_cds_YP_010188493.1_46	0.3021	0.3125	0.358	0.3158	61	0.482	0.466
NC_058538.1_cds_YP_010188494.1_47	0.2555	0.2993	0.3228	0.4828	51.74	0.561	0.427
NC_058538.1_cds_YP_010188495.1_48	0.5023	0.159	0.3656	0.1681	48.86	0.264	0.44
NC_058538.1_cds_YP_010188499.1_52	0.4368	0.2684	0.252	0.2844	47.45	0.418	0.41
NC_058538.1_cds_YP_010188500.1_53	0.4737	0.3158	0.2178	0.1744	40.45	0.401	0.392
NC_058538.1_cds_YP_010188501.1_54	0.2863	0.2775	0.4732	0.3143	50.63	0.421	0.347
NC_058538.1_cds_YP_010188502.1_55	0.172	0.3118	0.4343	0.3723	47.13	0.52	0.461
NC_058538.1_cds_YP_010188504.1_57	0.4158	0.2277	0.4028	0.3824	54.6	0.408	0.366
NC_058538.1_cds_YP_010188505.1_58	0.2222	0.2469	0.3875	0.4507	52.33	0.515	0.412
NC_058538.1_cds_YP_010188506.1_59	0.2258	0.3333	0.4615	0.3529	58.73	0.492	0.455
NC_058538.1_cds_YP_010188507.1_60	0.4198	0.2099	0.4783	0.2362	36.3	0.323	0.34
NC_058538.1_cds_YP_010188509.1_62	0.3096	0.2843	0.3672	0.3395	60	0.468	0.462
NC_058538.1_cds_YP_010188511.1_64	0.4465	0.202	0.3984	0.2681	52.52	0.34	0.375
NC_058538.1_cds_YP_010188512.1_65	0.4296	0.2113	0.4192	0.1355	49.36	0.282	0.377
NC_058538.1_cds_YP_010188513.1_66	0.3016	0.3016	0.3874	0.28	37.55	0.449	0.418
NC_058538.1_cds_YP_010188514.1_67	0.5507	0.1123	0.4302	0.1438	43.27	0.19	0.309
NC_058538.1_cds_YP_010188516.1_69	0.4895	0.1464	0.4145	0.2393	50	0.273	0.327
NC_058538.1_cds_YP_010188517.1_70	0.4226	0.1686	0.4508	0.1661	46.77	0.261	0.353
NC_058538.1_cds_YP_010188519.1_72	0.5513	0.2564	0.3333	0.2222	42.69	0.333	0.341
NC_058538.1_cds_YP_010188520.1_73	0.4906	0.1258	0.4104	0.1532	47.38	0.218	0.348
NC_058538.1_cds_YP_010188521.1_74	0.5407	0.1333	0.4955	0.1277	45.95	0.19	0.337
NC_058538.1_cds_YP_010188522.1_75	0.47	0.1104	0.4912	0.1157	43.1	0.179	0.331
NC_058538.1_cds_YP_010188523.1_76	0.482	0.1148	0.5122	0.1545	49.14	0.199	0.372
NC_058538.1_cds_YP_010188525.1_78	0.3693	0.2147	0.5357	0.2427	51.23	0.315	0.296
NC_058538.1_cds_YP_010188526.1_79	0.4167	0.1417	0.5271	0.1186	47.46	0.208	0.409
NC_058538.1_cds_YP_010188527.1_80	0.4296	0.2113	0.4192	0.1355	49.36	0.282	0.377
NC_058538.1_cds_YP_010188528.1_81	0.3456	0.2626	0.4028	0.2688	53.76	0.396	0.383
NC_058538.1_cds_YP_010188530.1_83	0.1979	0.2727	0.4242	0.3708	58.04	0.492	0.455
NC_058539.1_cds_YP_010228099.1_1	0.3021	0.3125	0.358	0.3158	61	0.482	0.466
NC_058539.1_cds_YP_010228100.1_2	0.2979	0.2128	0.308	0.3578	56.48	0.47	0.433
NC_058539.1_cds_YP_010228101.1_3	0.5246	0.1616	0.4181	0.2045	49.2	0.262	0.318
NC_058539.1_cds_YP_010228102.1_4	0.3333	0.3008	0.3493	0.2436	53.06	0.442	0.459
NC_058539.1_cds_YP_010228103.1_5	0.2364	0.2818	0.3275	0.4395	55.15	0.549	0.441
NC_058539.1_cds_YP_010228104.1_6	0.4286	0.2959	0.3714	0.2353	51.26	0.398	0.414
NC_058539.1_cds_YP_010228105.1_7	0.505	0.1287	0.4471	0.1304	45.23	0.198	0.353
NC_058539.1_cds_YP_010228106.1_8	0.4833	0.1667	0.4487	0.1268	47.49	0.234	0.388
NC_058539.1_cds_YP_010228107.1_9	0.4959	0.1626	0.4732	0.1429	47.9	0.23	0.382
NC_058539.1_cds_YP_010228108.1_10	0.487	0.1494	0.4606	0.1523	46.3	0.234	0.376
NC_058539.1_cds_YP_010228109.1_11	0.4887	0.1654	0.4322	0.2255	51.73	0.28	0.393
NC_058539.1_cds_YP_010228110.1_12	0.3899	0.2821	0.3363	0.2396	52.97	0.409	0.435
NC_058539.1_cds_YP_010228111.1_13	0.3799	0.2829	0.3474	0.2315	48.55	0.407	0.419
NC_058539.1_cds_YP_010228112.1_14	0.4156	0.0779	0.5185	0.2105	40.1	0.229	0.387
NC_058539.1_cds_YP_010228114.1_16	0.3343	0.2472	0.2424	0.3974	58.47	0.511	0.455
NC_058539.1_cds_YP_010228115.1_17	0.3646	0.2383	0.2317	0.3938	56.02	0.495	0.437
NC_058539.1_cds_YP_010228118.1_20	0.4477	0.1328	0.4589	0.2228	49.18	0.265	0.387
NC_058539.1_cds_YP_010228119.1_21	0.3887	0.2113	0.4132	0.2576	52.9	0.356	0.388
NC_058539.1_cds_YP_010228120.1_22	0.3306	0.2583	0.4498	0.3034	54.26	0.399	0.36
NC_058539.1_cds_YP_010228121.1_23	0.4684	0.1789	0.4566	0.1544	49.14	0.253	0.369
NC_058539.1_cds_YP_010228122.1_24	0.4692	0.1754	0.4427	0.1012	42.14	0.227	0.363
NC_058539.1_cds_YP_010228124.1_26	0.4317	0.1727	0.4545	0.2456	45.3	0.311	0.378
NC_058539.1_cds_YP_010228125.1_27	0.2528	0.2639	0.3284	0.4466	58.31	0.536	0.432
NC_058539.1_cds_YP_010228129.1_31	0.413	0.233	0.4565	0.247	51.87	0.346	0.364
NC_058539.1_cds_YP_010228131.1_33	0.4082	0.2381	0.3465	0.2719	48.8	0.388	0.383
NC_058539.1_cds_YP_010228132.1_34	0.4809	0.2131	0.4326	0.1707	45.49	0.287	0.347
NC_058539.1_cds_YP_010228133.1_35	0.5058	0.1362	0.3711	0.2434	48.84	0.286	0.398
NC_058539.1_cds_YP_010228142.1_44	0.4938	0.1235	0.4396	0.1951	39.98	0.245	0.339
NC_058539.1_cds_YP_010228143.1_45	0.2558	0.2558	0.5714	0.2174	35.99	0.346	0.346
NC_058539.1_cds_YP_010228144.1_46	0.3021	0.3125	0.358	0.3158	61	0.482	0.466
NC_058539.1_cds_YP_010228145.1_47	0.2555	0.2993	0.3228	0.4741	53.07	0.558	0.431
NC_058539.1_cds_YP_010228146.1_48	0.5011	0.1586	0.3656	0.1681	49.12	0.264	0.441
NC_058539.1_cds_YP_010228150.1_52	0.4346	0.267	0.252	0.2936	45.96	0.421	0.406
NC_058539.1_cds_YP_010228151.1_53	0.4737	0.3158	0.2178	0.1744	40.45	0.401	0.392
NC_058539.1_cds_YP_010228152.1_54	0.287	0.2696	0.476	0.3146	50.78	0.417	0.348
NC_058539.1_cds_YP_010228153.1_55	0.172	0.3118	0.4343	0.3723	47.38	0.52	0.463
NC_058539.1_cds_YP_010228155.1_57	0.4242	0.2222	0.4225	0.3731	53.23	0.395	0.361
NC_058539.1_cds_YP_010228156.1_58	0.2222	0.2469	0.3924	0.4571	53.79	0.515	0.406
NC_058539.1_cds_YP_010228157.1_59	0.2283	0.3152	0.4783	0.3488	59.17	0.476	0.45
NC_058539.1_cds_YP_010228158.1_60	0.411	0.2086	0.4752	0.2385	36.19	0.327	0.343
NC_058539.1_cds_YP_010228160.1_62	0.3096	0.2843	0.3672	0.3395	60	0.468	0.462
NC_058539.1_cds_YP_010228162.1_64	0.4466	0.2023	0.3992	0.2673	52.42	0.34	0.374
NC_058539.1_cds_YP_010228163.1_65	0.4296	0.2113	0.418	0.135	49.42	0.282	0.378
NC_058539.1_cds_YP_010228164.1_66	0.3016	0.3016	0.3874	0.28	37.55	0.449	0.418
NC_058539.1_cds_YP_010228165.1_67	0.5419	0.1153	0.439	0.1444	43.86	0.194	0.309
NC_058539.1_cds_YP_010228167.1_69	0.4958	0.1345	0.4301	0.2317	49.76	0.258	0.324
NC_058539.1_cds_YP_010228168.1_70	0.418	0.1709	0.4484	0.1683	46.81	0.265	0.356
NC_058539.1_cds_YP_010228170.1_72	0.5513	0.2564	0.3333	0.2222	49.82	0.333	0.348
NC_058539.1_cds_YP_010228171.1_73	0.4875	0.125	0.4179	0.1441	45.05	0.212	0.348
NC_058539.1_cds_YP_010228172.1_74	0.5407	0.1333	0.4955	0.1277	45.95	0.19	0.337
NC_058539.1_cds_YP_010228173.1_75	0.4715	0.1076	0.4894	0.1198	43.13	0.179	0.331
NC_058539.1_cds_YP_010228174.1_76	0.4885	0.1115	0.5017	0.1619	49.72	0.202	0.374
NC_058539.1_cds_YP_010228176.1_78	0.3687	0.2182	0.5466	0.233	50.45	0.312	0.297
NC_058539.1_cds_YP_010228177.1_79	0.4167	0.1417	0.5271	0.1186	47.46	0.208	0.409
NC_058539.1_cds_YP_010228178.1_80	0.4296	0.2113	0.418	0.135	49.42	0.282	0.378
NC_058539.1_cds_YP_010228179.1_81	0.345	0.262	0.4022	0.2693	54.05	0.396	0.383
NC_058539.1_cds_YP_010228181.1_83	0.1979	0.2727	0.4242	0.3708	58.04	0.492	0.455
NC_062094.1_cds_YP_010326411.1_1	0.3021	0.3125	0.358	0.3158	61	0.482	0.466
NC_062094.1_cds_YP_010326412.1_2	0.2989	0.2135	0.3068	0.3562	57	0.47	0.433
NC_062094.1_cds_YP_010326413.1_3	0.5238	0.1821	0.4246	0.2016	53.27	0.27	0.316
NC_062094.1_cds_YP_010326414.1_4	0.3306	0.2984	0.3549	0.2473	52.59	0.441	0.459
NC_062094.1_cds_YP_010326415.1_5	0.431	0.1798	0.4395	0.1532	48.78	0.269	0.424
NC_062094.1_cds_YP_010326416.1_6	0.4907	0.1296	0.3832	0.2198	48.95	0.266	0.391
NC_062094.1_cds_YP_010326417.1_7	0.505	0.1287	0.4419	0.1286	45.2	0.198	0.353
NC_062094.1_cds_YP_010326418.1_8	0.4833	0.1667	0.4359	0.1408	48.56	0.244	0.391
NC_062094.1_cds_YP_010326419.1_9	0.5041	0.1545	0.4732	0.1429	47.72	0.223	0.38
NC_062094.1_cds_YP_010326420.1_10	0.4837	0.1503	0.4667	0.1523	46.63	0.234	0.375
NC_062094.1_cds_YP_010326421.1_11	0.4812	0.1654	0.4492	0.2157	53.72	0.273	0.389
NC_062094.1_cds_YP_010326422.1_12	0.3899	0.2821	0.337	0.2384	53.14	0.409	0.434
NC_062094.1_cds_YP_010326423.1_13	0.3799	0.2829	0.3452	0.234	48.78	0.409	0.421
NC_062094.1_cds_YP_010326424.1_14	0.4156	0.0649	0.5185	0.2237	40.1	0.229	0.387
NC_062094.1_cds_YP_010326426.1_16	0.3371	0.2444	0.2424	0.3974	58.18	0.509	0.454
NC_062094.1_cds_YP_010326427.1_17	0.3659	0.2391	0.2327	0.3956	57.69	0.495	0.435
NC_062094.1_cds_YP_010326430.1_20	0.4531	0.1279	0.4572	0.2248	49.12	0.262	0.386
NC_062094.1_cds_YP_010326431.1_21	0.3891	0.2105	0.4127	0.2544	52.72	0.354	0.387
NC_062094.1_cds_YP_010326432.1_22	0.333	0.2589	0.4489	0.2999	54.24	0.398	0.359
NC_062094.1_cds_YP_010326433.1_23	0.4764	0.1675	0.4593	0.1554	49.67	0.244	0.364
NC_062094.1_cds_YP_010326434.1_24	0.4787	0.1564	0.4479	0.1071	41.82	0.214	0.36
NC_062094.1_cds_YP_010326436.1_26	0.4082	0.1769	0.4444	0.2773	47.92	0.337	0.378
NC_062094.1_cds_YP_010326437.1_27	0.4625	0.16	0.4134	0.1839	47.89	0.271	0.412
NC_062094.1_cds_YP_010326441.1_31	0.3173	0.168	0.4556	0.2959	52.12	0.346	0.355
NC_062094.1_cds_YP_010326443.1_33	0.396	0.2349	0.3643	0.2696	53.53	0.384	0.383
NC_062094.1_cds_YP_010326444.1_34	0.3672	0.2486	0.4	0.2422	58.9	0.375	0.353
NC_062094.1_cds_YP_010326445.1_35	0.5097	0.144	0.3619	0.2389	47.36	0.289	0.4
NC_062094.1_cds_YP_010326454.1_44	0.4935	0.1169	0.4368	0.1923	47.8	0.24	0.346
NC_062094.1_cds_YP_010326455.1_45	0.2529	0.2529	0.5714	0.2174	37.2	0.346	0.349
NC_062094.1_cds_YP_010326456.1_46	0.3021	0.3125	0.358	0.3158	61	0.482	0.466
NC_062094.1_cds_YP_010326457.1_47	0.4121	0.2424	0.3692	0.2	52.76	0.356	0.425
NC_062094.1_cds_YP_010326458.1_48	0.3786	0.269	0.2875	0.3099	57.22	0.447	0.455
NC_062094.1_cds_YP_010326462.1_52	0.5307	0.1453	0.3333	0.1622	42.77	0.251	0.398
NC_062094.1_cds_YP_010326463.1_53	0.4701	0.3134	0.2255	0.1724	41.19	0.399	0.394
NC_062094.1_cds_YP_010326464.1_54	0.2915	0.2735	0.4826	0.3023	50.77	0.411	0.345
NC_062094.1_cds_YP_010326465.1_55	0.1684	0.3053	0.43	0.3789	47.17	0.524	0.466
NC_062094.1_cds_YP_010326467.1_57	0.42	0.22	0.4167	0.3824	52.79	0.4	0.363
NC_062094.1_cds_YP_010326468.1_58	0.2222	0.2469	0.3875	0.4507	52.87	0.515	0.415
NC_062094.1_cds_YP_010326469.1_59	0.3119	0.3028	0.2447	0.4048	57.17	0.54	0.466
NC_062094.1_cds_YP_010326470.1_60	0.4099	0.2112	0.4786	0.2403	36.36	0.328	0.342
NC_062094.1_cds_YP_010326472.1_62	0.3096	0.2843	0.3708	0.3374	60.5	0.466	0.461
NC_062094.1_cds_YP_010326474.1_64	0.4469	0.2027	0.3986	0.2662	52.47	0.34	0.375
NC_062094.1_cds_YP_010326475.1_65	0.4296	0.2113	0.4192	0.1355	49.36	0.282	0.377
NC_062094.1_cds_YP_010326476.1_66	0.3016	0.3016	0.3874	0.28	37.55	0.449	0.418
NC_062094.1_cds_YP_010326477.1_67	0.5516	0.1078	0.4324	0.1429	42.77	0.187	0.311
NC_062094.1_cds_YP_010326479.1_69	0.4916	0.1513	0.4167	0.2331	49.67	0.273	0.332
NC_062094.1_cds_YP_010326480.1_70	0.4213	0.1736	0.4414	0.1689	47.06	0.268	0.358
NC_062094.1_cds_YP_010326482.1_72	0.3247	0.1818	0.4242	0.3818	44.61	0.398	0.337
NC_062094.1_cds_YP_010326483.1_73	0.3876	0.2481	0.3469	0.3529	61	0.425	0.366
NC_062094.1_cds_YP_010326484.1_74	0.3583	0.25	0.3772	0.3158	56.71	0.411	0.348
NC_062094.1_cds_YP_010326485.1_75	0.4652	0.1108	0.4965	0.1148	43.05	0.179	0.331
NC_062094.1_cds_YP_010326486.1_76	0.2955	0.2803	0.3711	0.3909	57.89	0.48	0.388
NC_062094.1_cds_YP_010326488.1_78	0.3696	0.2176	0.5357	0.2419	51.14	0.316	0.297
NC_062094.1_cds_YP_010326489.1_79	0.4167	0.1417	0.5271	0.1186	47.46	0.208	0.409
NC_062094.1_cds_YP_010326490.1_80	0.4757	0.2767	0.3263	0.1875	49.64	0.359	0.381
NC_062094.1_cds_YP_010326491.1_81	0.345	0.2626	0.4028	0.269	53.95	0.396	0.384
NC_062094.1_cds_YP_010326493.1_83	0.1979	0.2727	0.4242	0.3687	57.85	0.492	0.456
NC_062095.1_cds_YP_010326494.1_1	0.3021	0.3125	0.3704	0.3026	61	0.473	0.463
NC_062095.1_cds_YP_010326495.1_2	0.2989	0.21	0.312	0.3593	57.67	0.467	0.428
NC_062095.1_cds_YP_010326496.1_3	0.5379	0.1564	0.416	0.2039	49.25	0.255	0.311
NC_062095.1_cds_YP_010326497.1_4	0.3333	0.2981	0.3552	0.2463	52.66	0.439	0.459
NC_062095.1_cds_YP_010326498.1_5	0.436	0.1798	0.4346	0.1532	48.53	0.269	0.424
NC_062095.1_cds_YP_010326499.1_6	0.4862	0.1284	0.3796	0.2198	51.06	0.266	0.396
NC_062095.1_cds_YP_010326500.1_7	0.505	0.1089	0.4483	0.1429	44.64	0.189	0.347
NC_062095.1_cds_YP_010326501.1_8	0.4889	0.1611	0.4295	0.1479	47.7	0.244	0.391
NC_062095.1_cds_YP_010326502.1_9	0.4878	0.1626	0.4554	0.1735	49.85	0.25	0.39
NC_062095.1_cds_YP_010326503.1_10	0.487	0.1429	0.4695	0.1533	46.41	0.228	0.373
NC_062095.1_cds_YP_010326504.1_11	0.4887	0.1654	0.4492	0.2059	47.42	0.267	0.389
NC_062095.1_cds_YP_010326505.1_12	0.3905	0.2825	0.3341	0.2379	53.07	0.409	0.436
NC_062095.1_cds_YP_010326506.1_13	0.3799	0.2845	0.3467	0.2304	48.93	0.408	0.42
NC_062095.1_cds_YP_010326507.1_14	0.4026	0.0779	0.5185	0.2237	42.28	0.24	0.393
NC_062095.1_cds_YP_010326509.1_16	0.3333	0.2465	0.2424	0.3974	57.95	0.511	0.456
NC_062095.1_cds_YP_010326510.1_17	0.3659	0.2391	0.2346	0.3991	57.75	0.495	0.433
NC_062095.1_cds_YP_010326513.1_20	0.4536	0.1351	0.4522	0.2221	49.29	0.266	0.386
NC_062095.1_cds_YP_010326514.1_21	0.3917	0.209	0.4114	0.2576	52.98	0.354	0.386
NC_062095.1_cds_YP_010326515.1_22	0.3285	0.2575	0.4487	0.3029	54.35	0.399	0.36
NC_062095.1_cds_YP_010326516.1_23	0.4895	0.1632	0.4483	0.1544	46.34	0.24	0.364
NC_062095.1_cds_YP_010326517.1_24	0.4623	0.1698	0.4456	0.1124	42.29	0.23	0.364
NC_062095.1_cds_YP_010326519.1_26	0.4138	0.1793	0.448	0.2712	47.85	0.333	0.378
NC_062095.1_cds_YP_010326520.1_27	0.4675	0.1575	0.4157	0.1788	47.74	0.265	0.409
NC_062095.1_cds_YP_010326524.1_31	0.3235	0.1644	0.4568	0.2939	51.74	0.343	0.355
NC_062095.1_cds_YP_010326526.1_33	0.4027	0.2282	0.3643	0.2672	52.01	0.378	0.383
NC_062095.1_cds_YP_010326527.1_34	0.3636	0.2443	0.4133	0.2441	61	0.37	0.343
NC_062095.1_cds_YP_010326528.1_35	0.5058	0.1479	0.358	0.2423	47.16	0.295	0.403
NC_062095.1_cds_YP_010326537.1_44	0.5128	0.1154	0.4318	0.1795	37.66	0.228	0.34
NC_062095.1_cds_YP_010326538.1_45	0.2644	0.2644	0.5663	0.2059	37.06	0.346	0.343
NC_062095.1_cds_YP_010326539.1_46	0.3021	0.3125	0.3704	0.3026	61	0.473	0.463
NC_062095.1_cds_YP_010326540.1_47	0.4121	0.2424	0.3692	0.2	52.64	0.356	0.423
NC_062095.1_cds_YP_010326541.1_48	0.3786	0.269	0.2875	0.3134	56.83	0.448	0.452
NC_062095.1_cds_YP_010326545.1_52	0.4368	0.2632	0.252	0.2936	47.52	0.418	0.408
NC_062095.1_cds_YP_010326546.1_53	0.4737	0.3158	0.2178	0.1744	40.45	0.401	0.392
NC_062095.1_cds_YP_010326547.1_54	0.2895	0.2719	0.4757	0.3125	51.26	0.416	0.349
NC_062095.1_cds_YP_010326548.1_55	0.1702	0.3191	0.4286	0.3763	42.91	0.528	0.458
NC_062095.1_cds_YP_010326550.1_57	0.4242	0.2222	0.4167	0.3676	53.37	0.395	0.361
NC_062095.1_cds_YP_010326551.1_58	0.2195	0.2439	0.3827	0.4583	52.05	0.52	0.411
NC_062095.1_cds_YP_010326552.1_59	0.3148	0.3056	0.2421	0.4	48.05	0.54	0.466
NC_062095.1_cds_YP_010326553.1_60	0.4161	0.2112	0.4752	0.2308	37.38	0.323	0.342
NC_062095.1_cds_YP_010326555.1_62	0.3128	0.2821	0.3672	0.3395	58.47	0.466	0.459
NC_062095.1_cds_YP_010326557.1_64	0.4474	0.2033	0.3986	0.2657	52.48	0.339	0.374
NC_062095.1_cds_YP_010326558.1_65	0.4296	0.2113	0.4164	0.1387	49.61	0.284	0.378
NC_062095.1_cds_YP_010326559.1_66	0.3016	0.3016	0.3874	0.28	38.68	0.449	0.416
NC_062095.1_cds_YP_010326560.1_67	0.3667	0.275	0.3056	0.2857	50.98	0.442	0.498
NC_062095.1_cds_YP_010326561.1_68	0.5588	0.1103	0.4029	0.1362	43.56	0.189	0.331
NC_062095.1_cds_YP_010326563.1_70	0.4958	0.1429	0.4256	0.2256	48.52	0.261	0.322
NC_062095.1_cds_YP_010326564.1_71	0.4203	0.1732	0.4441	0.1694	47.13	0.268	0.356
NC_062095.1_cds_YP_010326566.1_73	0.3289	0.1842	0.4154	0.3889	42.4	0.402	0.333
NC_062095.1_cds_YP_010326567.1_74	0.4016	0.252	0.3438	0.3494	61	0.421	0.364
NC_062095.1_cds_YP_010326568.1_75	0.3636	0.2479	0.3772	0.3158	61	0.408	0.353
NC_062095.1_cds_YP_010326569.1_76	0.4715	0.1108	0.4877	0.1203	43.27	0.182	0.33
NC_062095.1_cds_YP_010326570.1_77	0.2966	0.289	0.3661	0.3945	57.51	0.486	0.387
NC_062095.1_cds_YP_010326572.1_79	0.3715	0.2148	0.5272	0.2456	51.48	0.319	0.3
NC_062095.1_cds_YP_010326573.1_80	0.3101	0.3023	0.3305	0.2963	58.94	0.473	0.484
NC_062095.1_cds_YP_010326574.1_81	0.4167	0.1417	0.5271	0.1186	46.53	0.208	0.406
NC_062095.1_cds_YP_010326575.1_82	0.4757	0.2767	0.3263	0.1875	49.73	0.359	0.382
NC_062095.1_cds_YP_010326576.1_83	0.3465	0.2624	0.402	0.2673	53.86	0.395	0.383
NC_062095.1_cds_YP_010326578.1_85	0.1989	0.2742	0.4264	0.3672	57.96	0.489	0.453
NC_062096.1_cds_YP_010326579.1_1	0.3021	0.3125	0.358	0.3158	61	0.482	0.463
NC_062096.1_cds_YP_010326580.1_2	0.2989	0.2135	0.3043	0.3532	57.17	0.47	0.436
NC_062096.1_cds_YP_010326581.1_3	0.5259	0.1604	0.42	0.2086	49.48	0.261	0.317
NC_062096.1_cds_YP_010326582.1_4	0.3342	0.2965	0.3505	0.2564	52.11	0.443	0.459
NC_062096.1_cds_YP_010326583.1_5	0.436	0.1749	0.442	0.1505	47.95	0.263	0.421
NC_062096.1_cds_YP_010326584.1_6	0.4722	0.1389	0.3889	0.2222	50.61	0.273	0.391
NC_062096.1_cds_YP_010326585.1_7	0.505	0.1089	0.4483	0.1389	44.87	0.189	0.353
NC_062096.1_cds_YP_010326586.1_8	0.4889	0.1667	0.4323	0.1418	49.03	0.244	0.391
NC_062096.1_cds_YP_010326587.1_9	0.4919	0.1613	0.4554	0.1633	50.03	0.243	0.388
NC_062096.1_cds_YP_010326588.1_10	0.4837	0.1503	0.4639	0.1513	46.25	0.234	0.376
NC_062096.1_cds_YP_010326589.1_11	0.4887	0.1654	0.4492	0.2059	51.22	0.267	0.387
NC_062096.1_cds_YP_010326590.1_12	0.3899	0.2821	0.3377	0.2384	53.18	0.409	0.434
NC_062096.1_cds_YP_010326591.1_13	0.3812	0.2822	0.3497	0.2285	48.65	0.405	0.419
NC_062096.1_cds_YP_010326592.1_14	0.4286	0.0649	0.525	0.2133	41.69	0.219	0.387
NC_062096.1_cds_YP_010326594.1_16	0.3343	0.2472	0.2424	0.3974	58.39	0.511	0.455
NC_062096.1_cds_YP_010326595.1_17	0.365	0.2409	0.2336	0.3973	58.24	0.497	0.433
NC_062096.1_cds_YP_010326598.1_20	0.4548	0.1363	0.4505	0.2204	49.48	0.266	0.388
NC_062096.1_cds_YP_010326599.1_21	0.3899	0.2108	0.4077	0.26	53.09	0.357	0.39
NC_062096.1_cds_YP_010326600.1_22	0.3271	0.2625	0.4469	0.3043	54.47	0.404	0.361
NC_062096.1_cds_YP_010326601.1_23	0.4895	0.1579	0.4566	0.1544	48.99	0.236	0.363
NC_062096.1_cds_YP_010326602.1_24	0.4789	0.1596	0.433	0.1183	42.16	0.225	0.36
NC_062096.1_cds_YP_010326604.1_26	0.4138	0.1793	0.448	0.2712	47.62	0.333	0.376
NC_062096.1_cds_YP_010326605.1_27	0.4663	0.1546	0.4171	0.1783	47.4	0.263	0.409
NC_062096.1_cds_YP_010326609.1_31	0.3182	0.1658	0.4571	0.2959	51.74	0.344	0.352
NC_062096.1_cds_YP_010326611.1_33	0.4014	0.2394	0.3415	0.2768	53.44	0.396	0.393
NC_062096.1_cds_YP_010326612.1_34	0.3714	0.2457	0.4027	0.2441	58.56	0.372	0.348
NC_062096.1_cds_YP_010326613.1_35	0.5019	0.144	0.3643	0.2456	48.02	0.294	0.401
NC_062096.1_cds_YP_010326622.1_44	0.5287	0.092	0.4316	0.1882	38	0.216	0.327
NC_062096.1_cds_YP_010326623.1_45	0.2558	0.2558	0.5714	0.2174	36.13	0.346	0.343
NC_062096.1_cds_YP_010326624.1_46	0.3021	0.3125	0.358	0.3158	61	0.482	0.463
NC_062096.1_cds_YP_010326625.1_47	0.4121	0.2424	0.3692	0.2	52.75	0.356	0.425
NC_062096.1_cds_YP_010326626.1_48	0.3786	0.269	0.2885	0.3145	56.13	0.448	0.449
NC_062096.1_cds_YP_010326630.1_52	0.4368	0.2684	0.252	0.2844	47.36	0.418	0.41
NC_062096.1_cds_YP_010326631.1_53	0.4737	0.3158	0.22	0.1744	40.58	0.401	0.392
NC_062096.1_cds_YP_010326632.1_54	0.2982	0.2719	0.4703	0.314	50.63	0.416	0.346
NC_062096.1_cds_YP_010326633.1_55	0.1848	0.3043	0.4388	0.3656	47.7	0.508	0.463
NC_062096.1_cds_YP_010326635.1_57	0.4286	0.2245	0.4225	0.3582	53.52	0.39	0.358
NC_062096.1_cds_YP_010326636.1_58	0.2222	0.2469	0.3875	0.4507	53.65	0.515	0.409
NC_062096.1_cds_YP_010326637.1_59	0.3119	0.3028	0.2447	0.4048	54.83	0.54	0.463
NC_062096.1_cds_YP_010326638.1_60	0.4188	0.2062	0.4786	0.2326	38	0.32	0.338
NC_062096.1_cds_YP_010326640.1_62	0.3128	0.2821	0.3672	0.3395	58.47	0.466	0.459
NC_062096.1_cds_YP_010326642.1_64	0.4477	0.2023	0.3989	0.2671	52.46	0.339	0.374
NC_062096.1_cds_YP_010326643.1_65	0.4296	0.2113	0.4164	0.1392	49.56	0.284	0.378
NC_062096.1_cds_YP_010326644.1_66	0.3016	0.3016	0.3805	0.2745	41.7	0.449	0.421
NC_062096.1_cds_YP_010326645.1_67	0.435	0.1805	0.4366	0.2637	55.84	0.312	0.32
NC_062096.1_cds_YP_010326647.1_69	0.4812	0.1464	0.4235	0.241	49.86	0.275	0.329
NC_062096.1_cds_YP_010326648.1_70	0.4217	0.1797	0.4454	0.1595	46.67	0.267	0.356
NC_062096.1_cds_YP_010326650.1_72	0.3205	0.1795	0.4308	0.3889	44.08	0.398	0.337
NC_062096.1_cds_YP_010326651.1_73	0.3906	0.25	0.3571	0.3412	60.57	0.418	0.359
NC_062096.1_cds_YP_010326652.1_74	0.3636	0.2479	0.3805	0.3191	52.37	0.408	0.344
NC_062096.1_cds_YP_010326653.1_75	0.4637	0.1136	0.4877	0.1193	44.05	0.185	0.336
NC_062096.1_cds_YP_010326654.1_76	0.3004	0.2776	0.369	0.3935	58.2	0.479	0.388
NC_062096.1_cds_YP_010326656.1_78	0.3704	0.2176	0.5322	0.2391	51.15	0.316	0.298
NC_062096.1_cds_YP_010326657.1_79	0.4083	0.15	0.5271	0.1176	48.26	0.215	0.411
NC_062096.1_cds_YP_010326658.1_80	0.4733	0.2791	0.3275	0.1882	49.87	0.361	0.382
NC_062096.1_cds_YP_010326659.1_81	0.3444	0.2631	0.4021	0.27	53.99	0.397	0.383
NC_062096.1_cds_YP_010326661.1_83	0.1989	0.2742	0.4264	0.3672	57.96	0.489	0.453
NC_062097.1_cds_YP_010326662.1_1	0.3021	0.3125	0.3704	0.3026	61	0.473	0.463
NC_062097.1_cds_YP_010326663.1_2	0.2989	0.21	0.3108	0.3578	57.4	0.467	0.429
NC_062097.1_cds_YP_010326664.1_3	0.5368	0.1591	0.4119	0.2066	49.48	0.259	0.314
NC_062097.1_cds_YP_010326665.1_4	0.3333	0.2981	0.3552	0.2463	52.66	0.439	0.459
NC_062097.1_cds_YP_010326666.1_5	0.436	0.1823	0.4321	0.1532	48.47	0.271	0.424
NC_062097.1_cds_YP_010326667.1_6	0.4862	0.1284	0.3796	0.2198	51.06	0.266	0.396
NC_062097.1_cds_YP_010326668.1_7	0.505	0.1089	0.4483	0.1429	44.64	0.189	0.347
NC_062097.1_cds_YP_010326669.1_8	0.4944	0.1611	0.4295	0.1408	46.44	0.239	0.39
NC_062097.1_cds_YP_010326670.1_9	0.4878	0.1545	0.4602	0.1717	49.32	0.243	0.388
NC_062097.1_cds_YP_010326671.1_10	0.487	0.1429	0.4756	0.1467	46.18	0.223	0.371
NC_062097.1_cds_YP_010326672.1_11	0.4887	0.1654	0.4492	0.2059	47.42	0.267	0.389
NC_062097.1_cds_YP_010326673.1_12	0.3905	0.2825	0.3341	0.2379	53.01	0.409	0.435
NC_062097.1_cds_YP_010326674.1_13	0.3799	0.2845	0.3482	0.2315	48.75	0.408	0.42
NC_062097.1_cds_YP_010326675.1_14	0.4026	0.0779	0.5185	0.2237	42.28	0.24	0.393
NC_062097.1_cds_YP_010326677.1_16	0.3296	0.2458	0.2424	0.4007	58.14	0.514	0.458
NC_062097.1_cds_YP_010326678.1_17	0.3659	0.2391	0.2346	0.3991	57.75	0.495	0.433
NC_062097.1_cds_YP_010326681.1_20	0.4524	0.134	0.4534	0.2234	49.31	0.266	0.386
NC_062097.1_cds_YP_010326682.1_21	0.3925	0.2094	0.41	0.2582	52.91	0.354	0.387
NC_062097.1_cds_YP_010326683.1_22	0.3292	0.258	0.4479	0.3041	54.32	0.4	0.36
NC_062097.1_cds_YP_010326684.1_23	0.4895	0.1632	0.4483	0.1544	46.34	0.24	0.364
NC_062097.1_cds_YP_010326685.1_24	0.467	0.1651	0.4456	0.1124	42.07	0.226	0.363
NC_062097.1_cds_YP_010326687.1_26	0.4138	0.1793	0.448	0.2712	47.85	0.333	0.378
NC_062097.1_cds_YP_010326688.1_27	0.4663	0.1571	0.4157	0.1788	47.77	0.265	0.41
NC_062097.1_cds_YP_010326692.1_31	0.3216	0.1676	0.4568	0.2949	51.87	0.345	0.355
NC_062097.1_cds_YP_010326694.1_33	0.4082	0.2313	0.3643	0.2586	54.04	0.374	0.383
NC_062097.1_cds_YP_010326695.1_34	0.3657	0.2514	0.4027	0.246	61	0.377	0.346
NC_062097.1_cds_YP_010326696.1_35	0.5058	0.1479	0.358	0.2423	47.1	0.295	0.402
NC_062097.1_cds_YP_010326705.1_44	0.5065	0.1169	0.4368	0.1795	37.86	0.23	0.343
NC_062097.1_cds_YP_010326706.1_45	0.2558	0.2674	0.5595	0.2206	36.01	0.355	0.343
NC_062097.1_cds_YP_010326707.1_46	0.3021	0.3125	0.3704	0.3026	61	0.473	0.463
NC_062097.1_cds_YP_010326708.1_47	0.4121	0.2424	0.3692	0.2	52.64	0.356	0.423
NC_062097.1_cds_YP_010326709.1_48	0.3786	0.269	0.2875	0.3134	56.83	0.448	0.452
NC_062097.1_cds_YP_010326713.1_52	0.4368	0.2684	0.252	0.2844	47.45	0.418	0.41
NC_062097.1_cds_YP_010326714.1_53	0.4737	0.3158	0.2178	0.1744	40.45	0.401	0.392
NC_062097.1_cds_YP_010326715.1_54	0.2895	0.2719	0.4757	0.3125	51.26	0.416	0.349
NC_062097.1_cds_YP_010326716.1_55	0.1702	0.3191	0.4286	0.3763	42.91	0.528	0.458
NC_062097.1_cds_YP_010326718.1_57	0.4388	0.2143	0.4167	0.3676	53.38	0.387	0.355
NC_062097.1_cds_YP_010326719.1_58	0.2195	0.2439	0.3875	0.4648	50.66	0.52	0.408
NC_062097.1_cds_YP_010326720.1_59	0.3148	0.3056	0.2421	0.4	48.05	0.54	0.466
NC_062097.1_cds_YP_010326721.1_60	0.4161	0.2112	0.4892	0.2266	36.82	0.318	0.338
NC_062097.1_cds_YP_010326723.1_62	0.3128	0.2821	0.3672	0.3395	58.47	0.466	0.459
NC_062097.1_cds_YP_010326725.1_64	0.448	0.2027	0.3986	0.2657	52.5	0.339	0.374
NC_062097.1_cds_YP_010326726.1_65	0.4296	0.2113	0.4164	0.1387	49.61	0.284	0.378
NC_062097.1_cds_YP_010326727.1_66	0.3016	0.3016	0.3874	0.28	38.68	0.449	0.416
NC_062097.1_cds_YP_010326728.1_67	0.3667	0.275	0.3056	0.2857	50.98	0.442	0.498
NC_062097.1_cds_YP_010326729.1_68	0.5547	0.1156	0.4343	0.132	43.63	0.186	0.31
NC_062097.1_cds_YP_010326731.1_70	0.4958	0.1429	0.4256	0.2242	48.9	0.261	0.323
NC_062097.1_cds_YP_010326732.1_71	0.418	0.1732	0.4441	0.1728	47.54	0.27	0.357
NC_062097.1_cds_YP_010326734.1_73	0.3289	0.1842	0.4154	0.3889	42.4	0.402	0.337
NC_062097.1_cds_YP_010326735.1_74	0.4016	0.252	0.3438	0.3494	61	0.421	0.361
NC_062097.1_cds_YP_010326736.1_75	0.3636	0.2479	0.3772	0.3158	61	0.408	0.35
NC_062097.1_cds_YP_010326737.1_76	0.4747	0.1108	0.4842	0.1203	43.23	0.182	0.33
NC_062097.1_cds_YP_010326738.1_77	0.2981	0.2868	0.3686	0.3927	56.11	0.484	0.385
NC_062097.1_cds_YP_010326740.1_79	0.3718	0.2164	0.5293	0.2406	50.81	0.316	0.299
NC_062097.1_cds_YP_010326741.1_80	0.3101	0.3023	0.3305	0.2963	58.94	0.473	0.484
NC_062097.1_cds_YP_010326742.1_81	0.4167	0.1417	0.5271	0.1186	46.53	0.208	0.406
NC_062097.1_cds_YP_010326743.1_82	0.4757	0.2767	0.3263	0.1875	49.73	0.359	0.382
NC_062097.1_cds_YP_010326744.1_83	0.3465	0.2624	0.4016	0.2675	53.98	0.396	0.383
NC_062097.1_cds_YP_010326746.1_85	0.1989	0.2742	0.4264	0.3672	57.96	0.489	0.453
NC_062098.1_cds_YP_010326747.1_1	0.3021	0.3125	0.358	0.3158	61	0.482	0.463
NC_062098.1_cds_YP_010326748.1_2	0.2989	0.2135	0.3056	0.3562	57.19	0.47	0.433
NC_062098.1_cds_YP_010326749.1_3	0.5296	0.1608	0.42	0.2053	49.57	0.259	0.313
NC_062098.1_cds_YP_010326750.1_4	0.3306	0.2957	0.3549	0.2545	52.12	0.442	0.459
NC_062098.1_cds_YP_010326751.1_5	0.4335	0.1823	0.437	0.1505	48.26	0.269	0.422
NC_062098.1_cds_YP_010326752.1_6	0.4815	0.1389	0.3889	0.2088	50.82	0.266	0.391
NC_062098.1_cds_YP_010326753.1_7	0.495	0.1089	0.4483	0.1528	44.38	0.198	0.356
NC_062098.1_cds_YP_010326754.1_8	0.4944	0.1667	0.4323	0.1348	48.9	0.239	0.39
NC_062098.1_cds_YP_010326755.1_9	0.4919	0.1613	0.4643	0.1531	49.7	0.236	0.386
NC_062098.1_cds_YP_010326756.1_10	0.4837	0.1503	0.4639	0.1513	45.83	0.234	0.376
NC_062098.1_cds_YP_010326757.1_11	0.4887	0.1654	0.4492	0.2059	51.22	0.267	0.387
NC_062098.1_cds_YP_010326758.1_12	0.3899	0.2821	0.3392	0.239	53.15	0.409	0.433
NC_062098.1_cds_YP_010326759.1_13	0.3812	0.2822	0.3467	0.2304	48.42	0.406	0.42
NC_062098.1_cds_YP_010326760.1_14	0.4156	0.0649	0.5309	0.2105	40.4	0.219	0.387
NC_062098.1_cds_YP_010326762.1_16	0.3333	0.2465	0.2447	0.3974	58.3	0.51	0.454
NC_062098.1_cds_YP_010326763.1_17	0.3659	0.2391	0.2308	0.3921	56.61	0.495	0.437
NC_062098.1_cds_YP_010326766.1_20	0.4577	0.1362	0.4469	0.2218	49.58	0.267	0.388
NC_062098.1_cds_YP_010326767.1_21	0.3888	0.2093	0.4091	0.2677	52.67	0.36	0.386
NC_062098.1_cds_YP_010326768.1_22	0.3281	0.2648	0.4473	0.307	54.32	0.405	0.359
NC_062098.1_cds_YP_010326769.1_23	0.4921	0.1518	0.4624	0.1477	48.65	0.227	0.362
NC_062098.1_cds_YP_010326770.1_24	0.4764	0.1698	0.4301	0.1124	42.15	0.23	0.364
NC_062098.1_cds_YP_010326772.1_26	0.4097	0.1806	0.4516	0.2712	46.96	0.335	0.375
NC_062098.1_cds_YP_010326773.1_27	0.4688	0.1546	0.4147	0.1783	47.48	0.263	0.408
NC_062098.1_cds_YP_010326777.1_31	0.3182	0.1684	0.4515	0.3038	52.88	0.35	0.352
NC_062098.1_cds_YP_010326779.1_33	0.4043	0.2411	0.3388	0.2844	48.77	0.399	0.391
NC_062098.1_cds_YP_010326780.1_34	0.3693	0.25	0.4014	0.248	58.53	0.377	0.348
NC_062098.1_cds_YP_010326781.1_35	0.5039	0.1523	0.3658	0.2325	47.88	0.292	0.402
NC_062098.1_cds_YP_010326790.1_44	0.4938	0.1235	0.4505	0.1829	39.38	0.236	0.336
NC_062098.1_cds_YP_010326791.1_45	0.2588	0.2588	0.5714	0.2143	45.73	0.346	0.336
NC_062098.1_cds_YP_010326792.1_46	0.3021	0.3125	0.358	0.3158	61	0.482	0.463
NC_062098.1_cds_YP_010326793.1_47	0.4121	0.2424	0.3692	0.2	52.76	0.356	0.425
NC_062098.1_cds_YP_010326794.1_48	0.3786	0.269	0.2885	0.3145	56.77	0.448	0.45
NC_062098.1_cds_YP_010326798.1_52	0.4368	0.2684	0.252	0.287	48.6	0.418	0.405
NC_062098.1_cds_YP_010326799.1_53	0.4701	0.3209	0.21	0.1765	42.57	0.408	0.394
NC_062098.1_cds_YP_010326800.1_54	0.2907	0.2819	0.468	0.3179	51.13	0.425	0.347
NC_062098.1_cds_YP_010326801.1_55	0.186	0.3023	0.4301	0.3864	47.61	0.517	0.461
NC_062098.1_cds_YP_010326803.1_57	0.4242	0.2222	0.4167	0.3676	53.37	0.395	0.361
NC_062098.1_cds_YP_010326804.1_58	0.2195	0.2439	0.3951	0.4444	51.66	0.51	0.411
NC_062098.1_cds_YP_010326805.1_59	0.3119	0.3028	0.2421	0.4	55.34	0.54	0.466
NC_062098.1_cds_YP_010326806.1_60	0.4161	0.2112	0.4676	0.2422	37.98	0.33	0.342
NC_062098.1_cds_YP_010326808.1_62	0.3128	0.2821	0.3672	0.3395	58.47	0.466	0.459
NC_062098.1_cds_YP_010326810.1_64	0.4474	0.2022	0.3986	0.2662	52.52	0.339	0.374
NC_062098.1_cds_YP_010326811.1_65	0.4296	0.2113	0.4192	0.1359	49.43	0.282	0.377
NC_062098.1_cds_YP_010326812.1_66	0.3016	0.3016	0.3805	0.2745	41.7	0.449	0.421
NC_062098.1_cds_YP_010326813.1_67	0.5509	0.1174	0.4203	0.1461	43.34	0.197	0.312
NC_062098.1_cds_YP_010326815.1_69	0.4916	0.1429	0.4256	0.2303	49.54	0.265	0.325
NC_062098.1_cds_YP_010326816.1_70	0.4263	0.1751	0.4454	0.1595	46.79	0.263	0.355
NC_062098.1_cds_YP_010326818.1_72	0.3247	0.1818	0.4308	0.3818	44.04	0.398	0.337
NC_062098.1_cds_YP_010326819.1_73	0.3906	0.25	0.3673	0.3294	60.8	0.411	0.357
NC_062098.1_cds_YP_010326820.1_74	0.3554	0.2562	0.3805	0.3191	53.57	0.415	0.346
NC_062098.1_cds_YP_010326821.1_75	0.4715	0.1108	0.4842	0.1198	43.79	0.182	0.333
NC_062098.1_cds_YP_010326822.1_76	0.2992	0.2841	0.3611	0.3981	58.15	0.486	0.389
NC_062098.1_cds_YP_010326824.1_78	0.3724	0.2114	0.5399	0.2345	50.63	0.309	0.297
NC_062098.1_cds_YP_010326825.1_79	0.4083	0.15	0.5271	0.1176	48.26	0.215	0.411
NC_062098.1_cds_YP_010326826.1_80	0.4733	0.2791	0.3275	0.1882	49.91	0.361	0.381
NC_062098.1_cds_YP_010326827.1_81	0.3459	0.2624	0.4033	0.2686	53.92	0.396	0.383
NC_062098.1_cds_YP_010326829.1_83	0.1989	0.2742	0.4264	0.3672	57.96	0.489	0.453
NC_063303.1_cds_YP_010374461.1_1	0.3021	0.3125	0.358	0.3158	61	0.482	0.466
NC_063303.1_cds_YP_010374462.1_2	0.2989	0.2135	0.308	0.3578	56.66	0.47	0.432
NC_063303.1_cds_YP_010374463.1_3	0.5271	0.16	0.4148	0.2131	49.51	0.264	0.315
NC_063303.1_cds_YP_010374464.1_4	0.3324	0.3	0.3505	0.2482	52.69	0.443	0.46
NC_063303.1_cds_YP_010374465.1_5	0.2364	0.2788	0.3304	0.4395	53.86	0.546	0.438
NC_063303.1_cds_YP_010374466.1_6	0.4286	0.2959	0.3714	0.2353	51.04	0.398	0.417
NC_063303.1_cds_YP_010374467.1_7	0.505	0.1089	0.4483	0.1408	44.88	0.189	0.35
NC_063303.1_cds_YP_010374468.1_8	0.4833	0.1667	0.4423	0.1338	47.82	0.239	0.39
NC_063303.1_cds_YP_010374469.1_9	0.4797	0.1707	0.4732	0.1531	48.83	0.243	0.386
NC_063303.1_cds_YP_010374470.1_10	0.4935	0.1429	0.4606	0.1523	45.94	0.228	0.375
NC_063303.1_cds_YP_010374471.1_11	0.4962	0.1654	0.4322	0.2157	51.73	0.273	0.391
NC_063303.1_cds_YP_010374472.1_12	0.3899	0.2821	0.337	0.2384	53.04	0.409	0.435
NC_063303.1_cds_YP_010374473.1_13	0.3799	0.2829	0.343	0.2333	48.89	0.409	0.421
NC_063303.1_cds_YP_010374474.1_14	0.4211	0.0789	0.5185	0.2105	39.48	0.229	0.383
NC_063303.1_cds_YP_010374476.1_16	0.3343	0.2472	0.2432	0.3987	58.44	0.511	0.453
NC_063303.1_cds_YP_010374477.1_17	0.3659	0.2391	0.2317	0.3938	54.82	0.495	0.436
NC_063303.1_cds_YP_010374480.1_20	0.4494	0.1318	0.4614	0.2201	48.96	0.263	0.386
NC_063303.1_cds_YP_010374481.1_21	0.3913	0.2117	0.4161	0.2545	52.75	0.353	0.386
NC_063303.1_cds_YP_010374482.1_22	0.3302	0.2575	0.4496	0.3028	54.42	0.398	0.36
NC_063303.1_cds_YP_010374483.1_23	0.4737	0.1684	0.4624	0.1544	49.86	0.244	0.366
NC_063303.1_cds_YP_010374484.1_24	0.3583	0.2567	0.3595	0.3382	60.18	0.435	0.37
NC_063303.1_cds_YP_010374486.1_26	0.4196	0.1818	0.4472	0.2672	47.38	0.331	0.379
NC_063303.1_cds_YP_010374487.1_27	0.2549	0.2661	0.3304	0.443	59.11	0.533	0.43
NC_063303.1_cds_YP_010374491.1_31	0.413	0.233	0.4674	0.2351	51.43	0.339	0.363
NC_063303.1_cds_YP_010374493.1_33	0.4082	0.2313	0.3571	0.2743	51.2	0.382	0.383
NC_063303.1_cds_YP_010374494.1_34	0.3693	0.2443	0.4067	0.2422	58.36	0.37	0.348
NC_063303.1_cds_YP_010374495.1_35	0.5097	0.1323	0.3696	0.2423	47.57	0.283	0.399
NC_063303.1_cds_YP_010374504.1_44	0.5287	0.092	0.4375	0.1744	38.17	0.207	0.327
NC_063303.1_cds_YP_010374505.1_45	0.2558	0.2558	0.5714	0.2174	35.99	0.346	0.346
NC_063303.1_cds_YP_010374506.1_46	0.3021	0.3125	0.358	0.3158	61	0.482	0.466
NC_063303.1_cds_YP_010374507.1_47	0.2555	0.2993	0.3228	0.4741	53.07	0.558	0.431
NC_063303.1_cds_YP_010374508.1_48	0.5011	0.1586	0.3602	0.1739	49.08	0.268	0.442
NC_063303.1_cds_YP_010374512.1_52	0.4368	0.2684	0.2541	0.287	47.11	0.418	0.408
NC_063303.1_cds_YP_010374513.1_53	0.4737	0.3158	0.2178	0.1744	40.45	0.401	0.392
NC_063303.1_cds_YP_010374514.1_54	0.2913	0.2696	0.4734	0.3164	50.7	0.417	0.344
NC_063303.1_cds_YP_010374515.1_55	0.172	0.3226	0.4242	0.3723	54.37	0.528	0.463
NC_063303.1_cds_YP_010374517.1_57	0.4242	0.2222	0.4225	0.3731	53.23	0.395	0.361
NC_063303.1_cds_YP_010374518.1_58	0.2222	0.2469	0.3924	0.4571	53.3	0.515	0.409
NC_063303.1_cds_YP_010374519.1_59	0.3119	0.3028	0.2447	0.4048	50.97	0.54	0.46
NC_063303.1_cds_YP_010374520.1_60	0.4136	0.2099	0.4786	0.2403	36.57	0.327	0.34
NC_063303.1_cds_YP_010374522.1_62	0.3096	0.2843	0.3652	0.3436	59.14	0.471	0.461
NC_063303.1_cds_YP_010374524.1_64	0.4458	0.2022	0.399	0.2676	52.5	0.34	0.375
NC_063303.1_cds_YP_010374525.1_65	0.4296	0.2113	0.418	0.135	49.42	0.282	0.378
NC_063303.1_cds_YP_010374526.1_66	0.3016	0.3016	0.3874	0.28	37.55	0.449	0.418
NC_063303.1_cds_YP_010374527.1_67	0.4118	0.2132	0.4112	0.2333	61	0.333	0.344
NC_063303.1_cds_YP_010374528.1_68	0.4384	0.1866	0.4292	0.2646	57.21	0.316	0.322
NC_063303.1_cds_YP_010374530.1_70	0.4979	0.135	0.4249	0.2331	49.59	0.259	0.324
NC_063303.1_cds_YP_010374531.1_71	0.4273	0.1709	0.4521	0.1567	46.43	0.257	0.353
NC_063303.1_cds_YP_010374533.1_73	0.3247	0.1818	0.4154	0.3889	43.94	0.402	0.348
NC_063303.1_cds_YP_010374534.1_74	0.3876	0.2481	0.3469	0.3529	61	0.425	0.366
NC_063303.1_cds_YP_010374535.1_75	0.3577	0.2439	0.3772	0.3298	57.38	0.412	0.348
NC_063303.1_cds_YP_010374536.1_76	0.4715	0.1108	0.4894	0.1152	43.08	0.179	0.332
NC_063303.1_cds_YP_010374537.1_77	0.3004	0.2852	0.3647	0.3927	58.92	0.483	0.389
NC_063303.1_cds_YP_010374539.1_79	0.3686	0.218	0.54	0.2355	50.61	0.314	0.297
NC_063303.1_cds_YP_010374540.1_80	0.4167	0.1417	0.5271	0.1186	47.46	0.208	0.409
NC_063303.1_cds_YP_010374541.1_81	0.4746	0.2785	0.3239	0.1882	49.69	0.361	0.382
NC_063303.1_cds_YP_010374542.1_82	0.4458	0.2022	0.399	0.2676	52.5	0.34	0.375
NC_063303.1_cds_YP_010374544.1_84	0.1968	0.2713	0.4271	0.3687	57.94	0.49	0.455
NC_063304.1_cds_YP_010374545.1_1	0.3021	0.3125	0.3704	0.3026	61	0.473	0.463
NC_063304.1_cds_YP_010374546.1_2	0.2989	0.21	0.3108	0.3578	57.4	0.467	0.429
NC_063304.1_cds_YP_010374547.1_3	0.5368	0.1591	0.4119	0.2066	49.4	0.259	0.313
NC_063304.1_cds_YP_010374548.1_4	0.3324	0.2973	0.3527	0.2482	52.99	0.441	0.46
NC_063304.1_cds_YP_010374549.1_5	0.2372	0.2763	0.3304	0.4353	52.6	0.544	0.439
NC_063304.1_cds_YP_010374550.1_6	0.4286	0.2959	0.3571	0.25	54.1	0.407	0.422
NC_063304.1_cds_YP_010374551.1_7	0.5149	0.1089	0.4368	0.1429	44.96	0.189	0.347
NC_063304.1_cds_YP_010374552.1_8	0.4862	0.1657	0.4258	0.1489	48.11	0.249	0.393
NC_063304.1_cds_YP_010374553.1_9	0.4839	0.1613	0.4561	0.17	50.08	0.248	0.39
NC_063304.1_cds_YP_010374554.1_10	0.487	0.1429	0.4695	0.1533	46.41	0.228	0.373
NC_063304.1_cds_YP_010374555.1_11	0.4962	0.1654	0.4492	0.1961	47.42	0.261	0.387
NC_063304.1_cds_YP_010374556.1_12	0.3905	0.2825	0.3341	0.2379	53.01	0.409	0.435
NC_063304.1_cds_YP_010374557.1_13	0.3799	0.2845	0.3467	0.2298	48.84	0.408	0.42
NC_063304.1_cds_YP_010374558.1_14	0.4026	0.0779	0.5185	0.2237	42.28	0.24	0.393
NC_063304.1_cds_YP_010374560.1_16	0.3333	0.2465	0.2424	0.3974	57.95	0.511	0.456
NC_063304.1_cds_YP_010374561.1_17	0.3659	0.2391	0.2346	0.3991	57.75	0.495	0.433
NC_063304.1_cds_YP_010374564.1_20	0.4524	0.1351	0.454	0.223	49.21	0.266	0.385
NC_063304.1_cds_YP_010374565.1_21	0.3917	0.209	0.4114	0.2576	52.94	0.354	0.387
NC_063304.1_cds_YP_010374566.1_22	0.3295	0.257	0.449	0.3028	54.29	0.398	0.36
NC_063304.1_cds_YP_010374567.1_23	0.4895	0.1632	0.4509	0.1544	45.1	0.24	0.364
NC_063304.1_cds_YP_010374568.1_24	0.3641	0.2609	0.3464	0.3358	58.48	0.439	0.375
NC_063304.1_cds_YP_010374570.1_26	0.4138	0.1793	0.448	0.2712	47.85	0.333	0.378
NC_063304.1_cds_YP_010374571.1_27	0.2563	0.2646	0.3294	0.4419	59.96	0.533	0.43
NC_063304.1_cds_YP_010374575.1_31	0.4147	0.2294	0.4604	0.2451	51.81	0.342	0.362
NC_063304.1_cds_YP_010374577.1_33	0.4054	0.2297	0.3615	0.265	53.41	0.378	0.383
NC_063304.1_cds_YP_010374578.1_34	0.3636	0.25	0.4067	0.2441	61	0.375	0.345
NC_063304.1_cds_YP_010374579.1_35	0.5058	0.1479	0.358	0.2423	47.46	0.295	0.403
NC_063304.1_cds_YP_010374588.1_44	0.5128	0.1154	0.4368	0.1795	37.86	0.228	0.34
NC_063304.1_cds_YP_010374589.1_45	0.2644	0.2644	0.5663	0.2059	36.81	0.346	0.343
NC_063304.1_cds_YP_010374590.1_46	0.3021	0.3125	0.3704	0.3026	61	0.473	0.463
NC_063304.1_cds_YP_010374591.1_47	0.2555	0.2993	0.3228	0.4828	52.44	0.561	0.427
NC_063304.1_cds_YP_010374592.1_48	0.4966	0.1632	0.3683	0.1652	48.98	0.266	0.441
NC_063304.1_cds_YP_010374596.1_52	0.4368	0.2684	0.252	0.2844	47.45	0.418	0.41
NC_063304.1_cds_YP_010374597.1_53	0.4809	0.3206	0.22	0.1765	39.06	0.401	0.387
NC_063304.1_cds_YP_010374598.1_54	0.2907	0.2731	0.478	0.3086	51.12	0.414	0.348
NC_063304.1_cds_YP_010374599.1_55	0.1702	0.3191	0.4286	0.3763	42.91	0.528	0.458
NC_063304.1_cds_YP_010374601.1_57	0.4242	0.2222	0.411	0.3623	52.38	0.395	0.363
NC_063304.1_cds_YP_010374602.1_58	0.2195	0.2439	0.3827	0.4583	52.05	0.52	0.411
NC_063304.1_cds_YP_010374603.1_59	0.3148	0.3056	0.2421	0.4	46.13	0.54	0.463
NC_063304.1_cds_YP_010374604.1_60	0.4161	0.2112	0.4786	0.2326	37.51	0.323	0.342
NC_063304.1_cds_YP_010374606.1_62	0.3096	0.2843	0.3652	0.3436	59.14	0.471	0.461
NC_063304.1_cds_YP_010374608.1_64	0.4482	0.2023	0.3995	0.2651	52.53	0.338	0.374
NC_063304.1_cds_YP_010374609.1_65	0.4296	0.2113	0.4164	0.1387	49.61	0.284	0.378
NC_063304.1_cds_YP_010374610.1_66	0.3016	0.3016	0.3874	0.28	38.68	0.449	0.416
NC_063304.1_cds_YP_010374611.1_67	0.4191	0.2206	0.4019	0.2308	60.21	0.338	0.348
NC_063304.1_cds_YP_010374612.1_68	0.4374	0.1851	0.4236	0.2751	57.09	0.321	0.322
NC_063304.1_cds_YP_010374614.1_70	0.4958	0.1387	0.4286	0.2229	48.63	0.257	0.322
NC_063304.1_cds_YP_010374615.1_71	0.4167	0.1736	0.4441	0.1761	47.69	0.272	0.357
NC_063304.1_cds_YP_010374617.1_73	0.32	0.1867	0.4154	0.3889	41.37	0.407	0.337
NC_063304.1_cds_YP_010374618.1_74	0.4094	0.252	0.3333	0.3494	61	0.421	0.364
NC_063304.1_cds_YP_010374619.1_75	0.3636	0.2479	0.3772	0.3158	61	0.408	0.35
NC_063304.1_cds_YP_010374620.1_76	0.4747	0.1108	0.4859	0.1208	44.12	0.182	0.33
NC_063304.1_cds_YP_010374621.1_77	0.3004	0.2852	0.3647	0.3955	57.26	0.485	0.387
NC_063304.1_cds_YP_010374623.1_79	0.4891	0.155	0.5522	0.1723	47.32	0.226	0.289
NC_063304.1_cds_YP_010374624.1_80	0.4167	0.1417	0.5271	0.1186	46.53	0.208	0.406
NC_063304.1_cds_YP_010374625.1_81	0.4757	0.2767	0.3263	0.1875	49.73	0.359	0.382
NC_063304.1_cds_YP_010374626.1_82	0.4482	0.2023	0.3995	0.2651	52.53	0.338	0.374
NC_063304.1_cds_YP_010374628.1_84	0.1968	0.2713	0.4271	0.3687	57.94	0.49	0.455
