# Supplementary material for: Comparative Analysis of Codon Usage Patterns in Nuclear and Chloroplast Genome of Dalbergia (Fabaceae)
Source: Genes (Basel). 2023 May 19;14(5):1110. doi: 10.3390/genes14051110 (PMC10217945; doi:10.3390/genes14051110)
Supplement: Supplementary file 1 [file genes-14-01110-s001.zip › Supplementary Excel S5.xlsx]

## Sheet: Sheet1
Code	Species	Codon NO.	GC1	GC2	GC3	GCall	ENC
A	Dalbergia armata	24577	0.4482	0.3739	0.2959	0.3727	49.45
B	Dalbergia cearensis	24427	0.4467	0.3732	0.2936	0.3712	49.25
C	Dalbergia chlorocarpa	24420	0.4475	0.3733	0.2946	0.3718	49.38
D	Dalbergia cultrata	24556	0.4474	0.3725	0.295	0.3717	49.37
E	Dalbergia frutescens	24567	0.4481	0.3739	0.2958	0.3726	49.44
F	Dalbergia hainanensis	24698	0.4476	0.3745	0.2976	0.3732	49.58
G	Dalbergia martinii	24412	0.4485	0.3743	0.296	0.373	49.48
H	Dalbergia obovata	24570	0.4477	0.3739	0.2959	0.3725	49.46
I	Dalbergia odorifera	24421	0.4469	0.3733	0.2952	0.3718	49.39
J	Dalbergia oliveri	24317	0.448	0.3726	0.2946	0.3717	49.36
K	Dalbergia sissoo	24425	0.4468	0.3733	0.2947	0.3716	49.37
L	Dalbergia tonkinensis	24417	0.4472	0.3733	0.2951	0.3719	49.4
M	Dalbergia vietnamensis	24571	0.4477	0.374	0.2962	0.3726	49.5
N	Dalbergia yunnanensis	24347	0.4478	0.3729	0.2953	0.372	49.43
O	Dalbergia candenatensis	24431	0.4475	0.3732	0.2937	0.3715	49.28
P	Dalbergia millettii	24738	0.4482	0.3742	0.297	0.3731	49.5
Q	Dalbergia benthamii	24451	0.4478	0.3728	0.2943	0.3716	49.3
R	Dalbergia hancei	24482	0.4494	0.3751	0.2983	0.3742	49.61
S	Dalbergia assamica	24344	0.4483	0.3732	0.2959	0.3725	49.45
T	Dalbergia mimosoides	24588	0.4471	0.3724	0.2954	0.3716	49.42
U	Dalbergia obtusifolia	24607	0.4471	0.3729	0.2943	0.3714	49.36
V	Dalbergia cochinchinensis	24477	0.4478	0.3731	0.2948	0.3719	49.32
W	Dalbergia bariensis	24347	0.448	0.3727	0.2942	0.3717	49.34
X	Dalbergia nigra	24438	0.4477	0.3728	0.2942	0.3716	49.33
Y	Dalbergia hupeana	24426	0.4483	0.3729	0.296	0.3724	49.47
