# Supplementary material for: Comparative Analysis of Codon Usage Patterns in Nuclear and Chloroplast Genome of Dalbergia (Fabaceae)
Source: Genes (Basel). 2023 May 19;14(5):1110. doi: 10.3390/genes14051110 (PMC10217945; doi:10.3390/genes14051110)
Supplement: Supplementary file 1 [file genes-14-01110-s001.zip › Supplementary Excel S6.xlsx]

## Sheet: whole genome
gene	GC3	GC12
evm.model.scaffold_30.17	0.3859	0.4864
evm.model.scaffold_30.33	0.3865	0.44785
evm.model.scaffold_30.74	0.3483	0.4583
evm.model.scaffold_30.62	0.3768	0.40025
evm.model.scaffold_30.18	0.4164	0.4197
evm.model.scaffold_30.35	0.4899	0.4713
evm.model.scaffold_30.6	0.3701	0.447
evm.model.scaffold_30.61	0.5272	0.55435
evm.model.scaffold_30.99.1	0.3788	0.4755
evm.model.scaffold_30.93	0.4441	0.4377
evm.model.scaffold_30.98	0.5143	0.5
evm.model.scaffold_30.15	0.4067	0.4
evm.model.scaffold_30.57	0.375	0.44645
evm.model.scaffold_30.38	0.541	0.47785
evm.model.scaffold_30.27	0.3694	0.4189
evm.model.scaffold_30.89_evm.model.scaffold_30.90	0.3513	0.4288
evm.model.scaffold_30.58	0.3968	0.4559
evm.model.scaffold_30.81	0.474	0.43345
evm.model.scaffold_30.3	0.3403	0.43525
evm.model.scaffold_30.53	0.6378	0.4465
evm.model.scaffold_30.97	0.2976	0.4911
evm.model.scaffold_30.42	0.6791	0.5264
evm.model.scaffold_30.92	0.4409	0.4441
evm.model.scaffold_30.13	0.5168	0.41345
evm.model.scaffold_30.16	0.4545	0.50855
evm.model.scaffold_30.41	0.4194	0.47235
evm.model.scaffold_30.28	0.3753	0.43925
evm.model.scaffold_30.50	0.3947	0.43505
evm.model.scaffold_30.59	0.6	0.42915
evm.model.scaffold_30.64	0.3844	0.41665
evm.model.scaffold_30.52	0.4087	0.41955
evm.model.scaffold_30.69	0.4157	0.44465
evm.model.scaffold_30.72	0.4105	0.3987
evm.model.scaffold_30.63	0.3445	0.5
evm.model.scaffold_405.1.1	0.5068	0.48425
evm.model.scaffold_389.2	0.348	0.4443
evm.model.scaffold_185.490	0.399	0.45565
evm.model.scaffold_185.467	0.681	0.5259
evm.model.scaffold_185.428	0.5093	0.4314
evm.model.scaffold_185.485	0.414	0.44795
evm.model.scaffold_185.420	0.409	0.45775
evm.model.scaffold_185.43	0.3447	0.47815
evm.model.scaffold_185.496	0.4296	0.4793
evm.model.scaffold_185.439	0.6368	0.5012
evm.model.scaffold_185.465_evm.model.scaffold_185.466	0.3875	0.4219
evm.model.scaffold_185.240	0.5269	0.42515
evm.model.scaffold_185.534	0.4316	0.4458
evm.model.scaffold_185.2	0.7057	0.5401
evm.model.scaffold_185.442	0.5437	0.6068
evm.model.scaffold_185.120	0.4314	0.41175
evm.model.scaffold_185.500	0.6013	0.4967
evm.model.scaffold_185.27	0.4084	0.44695
evm.model.scaffold_185.340.1	0.4262	0.44965
evm.model.scaffold_185.28	0.4747	0.4394
evm.model.scaffold_185.262	0.427	0.473
evm.model.scaffold_185.299	0.4316	0.41255
evm.model.scaffold_185.295	0.4673	0.4118
evm.model.scaffold_185.285	0.5237	0.4699
evm.model.scaffold_185.3	0.6019	0.5235
evm.model.scaffold_185.411	0.4094	0.45355
evm.model.scaffold_185.32	0.7484	0.44515
evm.model.scaffold_185.225	0.365	0.46715
evm.model.scaffold_185.29	0.4336	0.4431
evm.model.scaffold_185.70	0.3168	0.45545
evm.model.scaffold_185.6	0.5374	0.45575
evm.model.scaffold_185.117	0.44	0.4
evm.model.scaffold_185.325	0.3557	0.43815
evm.model.scaffold_185.284	0.422	0.4379
evm.model.scaffold_185.144	0.536	0.4268
evm.model.scaffold_185.403	0.4653	0.4288
evm.model.scaffold_185.376	0.375	0.4586
evm.model.scaffold_185.518	0.4104	0.4515
evm.model.scaffold_185.245	0.5795	0.47825
evm.model.scaffold_185.390	0.3689	0.43445
evm.model.scaffold_185.307	0.3389	0.43055
evm.model.scaffold_185.375	0.1879	0.78355
evm.model.scaffold_185.111	0.3791	0.43365
evm.model.scaffold_185.82	0.4346	0.5101
evm.model.scaffold_185.494	0.3865	0.5008
evm.model.scaffold_185.140	0.4533	0.475
evm.model.scaffold_185.314	0.5292	0.46575
evm.model.scaffold_185.129	0.7405	0.5068
evm.model.scaffold_185.454	0.4159	0.39785
evm.model.scaffold_185.324	0.3438	0.4703
evm.model.scaffold_185.125	0.3881	0.44335
evm.model.scaffold_185.264	0.3902	0.42995
evm.model.scaffold_185.34	0.4269	0.43525
evm.model.scaffold_185.115	0.6618	0.5909
evm.model.scaffold_185.514	0.4574	0.4479
evm.model.scaffold_185.255	0.4513	0.47565
evm.model.scaffold_185.414	0.5226	0.4843
evm.model.scaffold_185.216	0.4641	0.46615
evm.model.scaffold_185.99	0.3778	0.435
evm.model.scaffold_185.269	0.3267	0.3663
evm.model.scaffold_185.363	0.6324	0.4461
evm.model.scaffold_185.274	0.5487	0.48965
evm.model.scaffold_185.427	0.3899	0.42895
evm.model.scaffold_185.384	0.3065	0.5726
evm.model.scaffold_185.422	0.4724	0.4682
evm.model.scaffold_185.246	0.4595	0.46455
evm.model.scaffold_185.296	0.4286	0.4
evm.model.scaffold_185.481	0.4319	0.46495
evm.model.scaffold_185.444	0.486	0.4752
evm.model.scaffold_185.301	0.3907	0.5298
evm.model.scaffold_185.404	0.5302	0.4526
evm.model.scaffold_185.105	0.5127	0.4193
evm.model.scaffold_185.499	0.3698	0.498
evm.model.scaffold_185.212	0.4906	0.3915
evm.model.scaffold_185.80	0.4585	0.4205
evm.model.scaffold_185.451	0.4027	0.4324
evm.model.scaffold_185.448	0.5104	0.45285
evm.model.scaffold_185.38	0.4638	0.442
evm.model.scaffold_185.541	0.4632	0.56985
evm.model.scaffold_185.148	0.5893	0.49405
evm.model.scaffold_185.397	0.6528	0.5174
evm.model.scaffold_185.48	0.4449	0.4767
evm.model.scaffold_185.190	0.5736	0.4554
evm.model.scaffold_185.163	0.3677	0.44945
evm.model.scaffold_185.443	0.5699	0.51815
evm.model.scaffold_185.35	0.7436	0.4359
evm.model.scaffold_185.310	0.5556	0.4847
evm.model.scaffold_185.138	0.6245	0.4501
evm.model.scaffold_185.116	0.3676	0.46325
evm.model.scaffold_185.479	0.4657	0.48015
evm.model.scaffold_185.323	0.3535	0.4743
evm.model.scaffold_185.336	0.6544	0.46325
evm.model.scaffold_185.141	0.3375	0.42375
evm.model.scaffold_185.293	0.4587	0.48535
evm.model.scaffold_185.482	0.373	0.67565
evm.model.scaffold_185.421	0.3994	0.4697
evm.model.scaffold_185.386	0.4205	0.42055
evm.model.scaffold_185.46	0.3708	0.4282
evm.model.scaffold_185.510	0.3167	0.4733
evm.model.scaffold_185.538	0.3297	0.42435
evm.model.scaffold_185.392.1	0.4854	0.4583
evm.model.scaffold_185.400	0.4771	0.47885
evm.model.scaffold_185.368	0.4072	0.4642
evm.model.scaffold_185.152	0.584	0.476
evm.model.scaffold_185.10	0.4229	0.4205
evm.model.scaffold_185.436	0.3969	0.4071
evm.model.scaffold_185.507	0.4	0.4672
evm.model.scaffold_185.407	0.3985	0.48505
evm.model.scaffold_185.188	0.4545	0.49675
evm.model.scaffold_185.184	0.5202	0.4507
evm.model.scaffold_185.280	0.3272	0.44595
evm.model.scaffold_185.107	0.3953	0.48575
evm.model.scaffold_185.110	0.4429	0.44285
evm.model.scaffold_185.119	0.3889	0.45915
evm.model.scaffold_185.170	0.343	0.5
evm.model.scaffold_185.214	0.4766	0.4486
evm.model.scaffold_185.104	0.446	0.43345
evm.model.scaffold_185.59	0.4123	0.47365
evm.model.scaffold_185.391	0.3777	0.4476
evm.model.scaffold_185.87	0.3719	0.45225
evm.model.scaffold_185.187	0.5714	0.47145
evm.model.scaffold_185.146	0.3992	0.4516
evm.model.scaffold_185.268	0.3792	0.43635
evm.model.scaffold_185.446	0.4131	0.51875
evm.model.scaffold_185.98	0.345	0.40795
evm.model.scaffold_185.241	0.5141	0.5071
evm.model.scaffold_185.480	0.4329	0.4459
evm.model.scaffold_185.337_evm.model.scaffold_185.338	0.3636	0.49825
evm.model.scaffold_185.158	0.6301	0.4315
evm.model.scaffold_185.237	0.3849	0.4347
evm.model.scaffold_185.156	0.4204	0.47445
evm.model.scaffold_185.335	0.398	0.47705
evm.model.scaffold_185.244	0.3487	0.45185
evm.model.scaffold_185.460	0.4202	0.4427
evm.model.scaffold_185.308	0.4506	0.49385
evm.model.scaffold_185.7	0.4301	0.4522
evm.model.scaffold_185.123	0.3868	0.43285
evm.model.scaffold_185.19	0.3936	0.43
evm.model.scaffold_185.447	0.678	0.50845
evm.model.scaffold_185.352	0.4615	0.44405
evm.model.scaffold_185.539	0.381	0.4405
evm.model.scaffold_185.73	0.3586	0.4747
evm.model.scaffold_185.364	0.5333	0.5182
evm.model.scaffold_185.275	0.4074	0.42595
evm.model.scaffold_185.516	0.3992	0.4636
evm.model.scaffold_185.330	0.3765	0.4518
evm.model.scaffold_185.71	0.3876	0.4581
evm.model.scaffold_185.182	0.3982	0.49115
evm.model.scaffold_185.202	0.365	0.4635
evm.model.scaffold_185.250	0.4463	0.4432
evm.model.scaffold_185.358	0.4125	0.4362
evm.model.scaffold_185.20	0.3973	0.4949
evm.model.scaffold_185.288	0.3925	0.4319
evm.model.scaffold_185.438	0.439	0.4439
evm.model.scaffold_185.437	0.402	0.4071
evm.model.scaffold_185.183	0.4613	0.43725
evm.model.scaffold_185.69	0.4758	0.42875
evm.model.scaffold_185.473	0.4581	0.44135
evm.model.scaffold_185.61	0.5541	0.46175
evm.model.scaffold_185.317	0.4479	0.48355
evm.model.scaffold_185.74	0.5878	0.49325
evm.model.scaffold_185.51	0.4503	0.47905
evm.model.scaffold_185.347	0.4688	0.5078
evm.model.scaffold_185.401	0.3985	0.47495
evm.model.scaffold_185.114	0.4352	0.4405
evm.model.scaffold_185.136	0.3761	0.4857
evm.model.scaffold_185.221	0.3333	0.3619
evm.model.scaffold_185.215	0.4279	0.4657
evm.model.scaffold_185.327	0.4612	0.46865
evm.model.scaffold_185.131	0.5078	0.5768
evm.model.scaffold_185.300	0.4133	0.4464
evm.model.scaffold_185.26	0.4385	0.4944
evm.model.scaffold_185.456	0.3476	0.45595
evm.model.scaffold_185.272	0.4624	0.47715
evm.model.scaffold_185.521	0.6242	0.4798
evm.model.scaffold_185.367	0.4209	0.4799
evm.model.scaffold_185.532	0.7263	0.5158
evm.model.scaffold_185.81	0.3964	0.4314
evm.model.scaffold_185.68	0.4065	0.4242
evm.model.scaffold_185.458	0.4078	0.4495
evm.model.scaffold_185.58	0.4438	0.47115
evm.model.scaffold_185.218	0.5189	0.47835
evm.model.scaffold_185.1	0.5435	0.6087
evm.model.scaffold_185.416	0.4105	0.45035
evm.model.scaffold_185.238	0.5945	0.46805
evm.model.scaffold_185.222	0.2993	0.40135
evm.model.scaffold_185.84	0.4834	0.5683
evm.model.scaffold_185.193	0.5011	0.48935
evm.model.scaffold_185.30	0.7377	0.5082
evm.model.scaffold_185.165	0.5386	0.41635
evm.model.scaffold_185.90	0.4094	0.4298
evm.model.scaffold_185.270	0.468	0.50145
evm.model.scaffold_185.15	0.5991	0.4946
evm.model.scaffold_185.512	0.4626	0.45795
evm.model.scaffold_185.89	0.4145	0.4508
evm.model.scaffold_185.159	0.4356	0.47085
evm.model.scaffold_185.354	0.4479	0.4375
evm.model.scaffold_185.361	0.502	0.45265
evm.model.scaffold_185.313	0.3521	0.53545
evm.model.scaffold_185.63	0.553	0.4823
evm.model.scaffold_185.349	0.3977	0.43185
evm.model.scaffold_185.491	0.5644	0.49245
evm.model.scaffold_185.369	0.563	0.4315
evm.model.scaffold_185.145	0.6545	0.49835
evm.model.scaffold_185.277	0.3901	0.45065
evm.model.scaffold_185.200	0.36	0.47
evm.model.scaffold_185.504	0.3797	0.46885
evm.model.scaffold_185.149	0.5772	0.46745
evm.model.scaffold_185.14	0.3595	0.4614
evm.model.scaffold_185.172	0.4109	0.376
evm.model.scaffold_185.257	0.456	0.4186
evm.model.scaffold_185.96	0.5563	0.4437
evm.model.scaffold_185.18	0.6511	0.55105
evm.model.scaffold_185.453	0.5114	0.48295
evm.model.scaffold_185.478	0.7268	0.54645
evm.model.scaffold_185.388	0.3419	0.4513
evm.model.scaffold_185.78	0.466	0.40775
evm.model.scaffold_185.302	0.4297	0.5078
evm.model.scaffold_185.322	0.5086	0.43535
evm.model.scaffold_185.351	0.4433	0.4828
evm.model.scaffold_185.157	0.625	0.5037
evm.model.scaffold_185.529	0.4241	0.42405
evm.model.scaffold_185.387	0.3557	0.5487
evm.model.scaffold_185.194	0.3928	0.4549
evm.model.scaffold_185.227	0.3653	0.38855
evm.model.scaffold_185.36	0.5183	0.456
evm.model.scaffold_185.423	0.3889	0.4722
evm.model.scaffold_185.195	0.4278	0.44725
evm.model.scaffold_185.306	0.4241	0.42405
evm.model.scaffold_185.233	0.6821	0.5359
evm.model.scaffold_185.371	0.4158	0.3465
evm.model.scaffold_185.162	0.3701	0.4319
evm.model.scaffold_185.260	0.3911	0.46865
evm.model.scaffold_185.40	0.5567	0.50355
evm.model.scaffold_185.79	0.6061	0.45455
evm.model.scaffold_185.271	0.4921	0.43195
evm.model.scaffold_185.179	0.5705	0.44295
evm.model.scaffold_185.382	0.3474	0.49295
evm.model.scaffold_185.94	0.5204	0.4778
evm.model.scaffold_185.121	0.4664	0.4536
evm.model.scaffold_185.385	0.8389	0.5379
evm.model.scaffold_185.97	0.4404	0.46115
evm.model.scaffold_185.134	0.4381	0.4
evm.model.scaffold_185.66_evm.model.scaffold_185.67	0.3534	0.46205
evm.model.scaffold_185.409	0.521	0.4286
evm.model.scaffold_185.463	0.2837	0.46975
evm.model.scaffold_185.374	0.2148	0.797
evm.model.scaffold_185.42	0.4402	0.4423
evm.model.scaffold_185.547	0.3803	0.44985
evm.model.scaffold_185.201	0.5769	0.45
evm.model.scaffold_185.544	0.424	0.4516
evm.model.scaffold_185.459.1	0.467	0.4009
evm.model.scaffold_185.489	0.6765	0.51595
evm.model.scaffold_185.77	0.3483	0.4698
evm.model.scaffold_185.372	0.7281	0.5658
evm.model.scaffold_185.102	0.4676	0.4853
evm.model.scaffold_185.124	0.4469	0.52365
evm.model.scaffold_185.50	0.5051	0.45935
evm.model.scaffold_185.211	0.522	0.47455
evm.model.scaffold_185.100	0.4293	0.40765
evm.model.scaffold_185.198	0.3255	0.49095
evm.model.scaffold_185.154	0.4124	0.47845
evm.model.scaffold_185.133	0.3788	0.4506
evm.model.scaffold_185.197	0.4754	0.48295
evm.model.scaffold_185.109	0.4053	0.4394
evm.model.scaffold_185.92	0.4741	0.4181
evm.model.scaffold_185.72	0.3846	0.4526
evm.model.scaffold_185.434	0.4874	0.41385
evm.model.scaffold_185.379	0.3759	0.47545
evm.model.scaffold_185.204	0.3734	0.4156
evm.model.scaffold_185.31	0.374	0.42935
evm.model.scaffold_185.360	0.5428	0.4721
evm.model.scaffold_185.503	0.4348	0.51735
evm.model.scaffold_185.143	0.6311	0.5014
evm.model.scaffold_185.242	0.4052	0.46915
evm.model.scaffold_185.135	0.4885	0.4809
evm.model.scaffold_185.57	0.4701	0.44235
evm.model.scaffold_185.432	0.5774	0.5357
evm.model.scaffold_185.230	0.6169	0.48215
evm.model.scaffold_185.167	0.3797	0.4688
evm.model.scaffold_185.44	0.3728	0.4474
evm.model.scaffold_185.472	0.4461	0.4804
evm.model.scaffold_185.8	0.4797	0.45945
evm.model.scaffold_185.320	0.4742	0.44975
evm.model.scaffold_185.137	0.4375	0.42015
evm.model.scaffold_185.383	0.3868	0.54245
evm.model.scaffold_185.461	0.5328	0.4367
evm.model.scaffold_185.256	0.3693	0.44885
evm.model.scaffold_185.430	0.3829	0.4916
evm.model.scaffold_185.291	0.4623	0.4416
evm.model.scaffold_185.261	0.4194	0.4801
evm.model.scaffold_185.185	0.438	0.4256
evm.model.scaffold_185.75	0.6081	0.5081
evm.model.scaffold_185.426	0.4793	0.4876
evm.model.scaffold_185.506	0.5336	0.4412
evm.model.scaffold_185.248	0.4038	0.4615
evm.model.scaffold_185.24	0.3321	0.4809
evm.model.scaffold_185.527	0.6429	0.5238
evm.model.scaffold_185.433	0.432	0.50405
evm.model.scaffold_185.373	0.7247	0.54215
evm.model.scaffold_185.118	0.3892	0.50865
evm.model.scaffold_185.267	0.4299	0.4525
evm.model.scaffold_185.130	0.5068	0.3973
evm.model.scaffold_185.469	0.3816	0.4551
evm.model.scaffold_185.366	0.4764	0.44425
evm.model.scaffold_185.112	0.3728	0.5059
evm.model.scaffold_185.60	0.4462	0.51285
evm.model.scaffold_185.520	0.4497	0.4295
evm.model.scaffold_185.263	0.4357	0.425
evm.model.scaffold_185.231	0.4855	0.526
evm.model.scaffold_185.292	0.3759	0.4511
evm.model.scaffold_185.334	0.5402	0.54985
evm.model.scaffold_185.166	0.4271	0.4427
evm.model.scaffold_185.217	0.4433	0.4545
evm.model.scaffold_185.345	0.3903	0.39975
evm.model.scaffold_185.142	0.4541	0.4762
evm.model.scaffold_185.127	0.6621	0.51185
evm.model.scaffold_185.25	0.3809	0.40695
evm.model.scaffold_185.199	0.4048	0.46385
evm.model.scaffold_185.474	0.3683	0.4733
evm.model.scaffold_185.431	0.4106	0.4232
evm.model.scaffold_185.53	0.398	0.46475
evm.model.scaffold_185.276	0.4552	0.44805
evm.model.scaffold_185.408	0.395	0.46435
evm.model.scaffold_185.41	0.4206	0.50375
evm.model.scaffold_185.517	0.4059	0.4362
evm.model.scaffold_185.395	0.4569	0.48705
evm.model.scaffold_185.286	0.5118	0.46765
evm.model.scaffold_185.173	0.349	0.43955
evm.model.scaffold_185.65	0.464	0.46855
evm.model.scaffold_185.287	0.3538	0.4824
evm.model.scaffold_185.356	0.408	0.4516
evm.model.scaffold_185.253	0.3801	0.5029
evm.model.scaffold_185.252	0.5479	0.48935
evm.model.scaffold_185.21_evm.model.scaffold_185.22	0.4623	0.51715
evm.model.scaffold_185.12_evm.model.scaffold_185.13	0.3668	0.49625
evm.model.scaffold_185.139	0.4615	0.4682
evm.model.scaffold_185.471	0.5427	0.45725
evm.model.scaffold_185.393	0.6468	0.52975
evm.model.scaffold_185.88	0.4337	0.43975
evm.model.scaffold_185.93	0.436	0.4367
evm.model.scaffold_185.76	0.4555	0.5108
evm.model.scaffold_185.196	0.3459	0.47965
evm.model.scaffold_185.470	0.8252	0.56595
evm.model.scaffold_185.435	0.4617	0.4808
evm.model.scaffold_185.344	0.358	0.4537
evm.model.scaffold_185.380	0.7518	0.4948
evm.model.scaffold_185.155	0.4924	0.4547
evm.model.scaffold_185.220	0.3952	0.43955
evm.model.scaffold_185.224	0.5254	0.47035
evm.model.scaffold_185.493	0.7598	0.56335
evm.model.scaffold_185.294	0.4414	0.4356
evm.model.scaffold_185.168	0.7687	0.53205
evm.model.scaffold_185.398	0.4379	0.47065
evm.model.scaffold_185.83	0.4809	0.55745
evm.model.scaffold_185.321	0.4035	0.466
evm.model.scaffold_185.95	0.3829	0.4429
evm.model.scaffold_185.52	0.7619	0.46825
evm.model.scaffold_185.161	0.4152	0.444
evm.model.scaffold_185.298	0.3832	0.47305
evm.model.scaffold_185.343	0.4241	0.5059
evm.model.scaffold_185.23	0.5929	0.4923
evm.model.scaffold_185.210	0.356	0.481
evm.model.scaffold_185.11	0.4383	0.39945
evm.model.scaffold_185.297	0.3983	0.4502
evm.model.scaffold_185.309	0.4088	0.45495
evm.model.scaffold_185.389	0.3934	0.42645
evm.model.scaffold_185.108	0.4662	0.4323
evm.model.scaffold_185.519	0.4339	0.4553
evm.model.scaffold_185.209	0.3866	0.44875
evm.model.scaffold_185.475	0.4206	0.4286
evm.model.scaffold_185.342	0.4471	0.49705
evm.model.scaffold_185.333	0.483	0.48665
evm.model.scaffold_185.101	0.3429	0.44075
evm.model.scaffold_185.455	0.4277	0.40465
evm.model.scaffold_185.311	0.3962	0.45595
evm.model.scaffold_185.213	0.4202	0.4544
evm.model.scaffold_185.147	0.3944	0.46435
evm.model.scaffold_185.219	0.5381	0.44395
evm.model.scaffold_185.304	0.4165	0.4623
evm.model.scaffold_185.483	0.517	0.4471
evm.model.scaffold_185.91	0.4734	0.46075
evm.model.scaffold_185.508	0.6787	0.5116
evm.model.scaffold_185.402	0.5468	0.3885
evm.model.scaffold_185.365	0.4983	0.4826
evm.model.scaffold_185.126	0.4442	0.50365
evm.model.scaffold_185.171	0.4406	0.40595
evm.model.scaffold_185.223	0.3758	0.43625
evm.model.scaffold_185.405	0.3914	0.43375
evm.model.scaffold_185.49	0.3814	0.4701
evm.model.scaffold_185.239	0.3439	0.47695
evm.model.scaffold_185.5	0.4162	0.45135
evm.model.scaffold_185.419	0.4133	0.4533
evm.model.scaffold_185.495	0.4569	0.50375
evm.model.scaffold_185.160	0.4276	0.6053
evm.model.scaffold_185.341	0.4393	0.52335
evm.model.scaffold_185.289	0.407	0.4304
evm.model.scaffold_185.62	0.5811	0.41
evm.model.scaffold_185.359	0.7316	0.4816
evm.model.scaffold_185.316	0.5212	0.46745
evm.model.scaffold_185.449	0.3855	0.4873
evm.model.scaffold_185.530	0.3904	0.4592
evm.model.scaffold_185.545	0.4395	0.41
evm.model.scaffold_185.175	0.3866	0.4845
evm.model.scaffold_185.174	0.3602	0.3944
evm.model.scaffold_185.468	0.4576	0.4237
evm.model.scaffold_185.103	0.4462	0.463
evm.model.scaffold_185.399.1	0.4463	0.427
evm.model.scaffold_185.362.1	0.5793	0.52415
evm.model.scaffold_185.9	0.4802	0.39265
evm.model.scaffold_185.243	0.3675	0.52815
evm.model.scaffold_185.303	0.4393	0.4367
evm.model.scaffold_185.457	0.3474	0.48035
evm.model.scaffold_185.418	0.4741	0.48205
evm.model.scaffold_185.355	0.3761	0.4423
evm.model.scaffold_185.228	0.4145	0.4309
evm.model.scaffold_185.502	0.597	0.55075
evm.model.scaffold_185.370	0.555	0.45645
evm.model.scaffold_185.450	0.3957	0.47545
evm.model.scaffold_185.56	0.4685	0.47435
evm.model.scaffold_185.511	0.5627	0.45945
evm.model.scaffold_185.54	0.4824	0.45585
evm.model.scaffold_185.410	0.4364	0.4216
evm.model.scaffold_185.278	0.5514	0.5524
evm.model.scaffold_287.4	0.3582	0.47035
evm.model.scaffold_287.3	0.4341	0.4478
evm.model.scaffold_287.5.1	0.3821	0.4223
evm.model.scaffold_287.1	0.5351	0.45945
evm.model.scaffold_35.82	0.3596	0.48685
evm.model.scaffold_35.1161	0.5133	0.48665
evm.model.scaffold_35.30	0.3846	0.4458
evm.model.scaffold_35.330	0.3398	0.45875
evm.model.scaffold_35.873	0.4505	0.45875
evm.model.scaffold_35.309	0.4729	0.4036
evm.model.scaffold_35.1064	0.5115	0.52305
evm.model.scaffold_35.905	0.3583	0.4514
evm.model.scaffold_35.152	0.4038	0.3942
evm.model.scaffold_35.1151	0.4236	0.4655
evm.model.scaffold_35.449	0.3875	0.423
evm.model.scaffold_35.631	0.3684	0.4415
evm.model.scaffold_35.417	0.3861	0.4455
evm.model.scaffold_35.872	0.4442	0.43295
evm.model.scaffold_35.89	0.45	0.39285
evm.model.scaffold_35.548	0.7845	0.5
evm.model.scaffold_35.436	0.3556	0.4926
evm.model.scaffold_35.192	0.4034	0.4574
evm.model.scaffold_35.141	0.3961	0.4318
evm.model.scaffold_35.713	0.4206	0.3925
evm.model.scaffold_35.1176	0.3696	0.49455
evm.model.scaffold_35.1079	0.3637	0.4934
evm.model.scaffold_35.719	0.5137	0.5653
evm.model.scaffold_35.400	0.5014	0.4582
evm.model.scaffold_35.1185	0.4123	0.4664
evm.model.scaffold_35.753	0.3475	0.48305
evm.model.scaffold_35.254	0.3612	0.38965
evm.model.scaffold_35.608	0.7886	0.4065
evm.model.scaffold_35.697	0.3544	0.4578
evm.model.scaffold_35.302	0.354	0.41925
evm.model.scaffold_35.545	0.4028	0.4207
evm.model.scaffold_35.21	0.6222	0.44075
evm.model.scaffold_35.273	0.4148	0.3987
evm.model.scaffold_35.266	0.3713	0.3952
evm.model.scaffold_35.307	0.4807	0.4095
evm.model.scaffold_35.369	0.3777	0.4644
evm.model.scaffold_35.427	0.3271	0.40655
evm.model.scaffold_35.94	0.4123	0.45735
evm.model.scaffold_35.957	0.4851	0.41585
evm.model.scaffold_35.177	0.3803	0.4648
evm.model.scaffold_35.349	0.3948	0.42625
evm.model.scaffold_35.1077	0.5394	0.52425
evm.model.scaffold_35.110	0.4045	0.42805
evm.model.scaffold_35.296	0.3429	0.446
evm.model.scaffold_35.834	0.4805	0.45945
evm.model.scaffold_35.297.1	0.432	0.476
evm.model.scaffold_35.878	0.4767	0.4731
evm.model.scaffold_35.1136	0.6494	0.48755
evm.model.scaffold_35.1081	0.2821	0.39745
evm.model.scaffold_35.34	0.5108	0.47665
evm.model.scaffold_35.304	0.4118	0.37135
evm.model.scaffold_35.318	0.3971	0.4654
evm.model.scaffold_35.958	0.4541	0.5153
evm.model.scaffold_35.176	0.5915	0.4789
evm.model.scaffold_35.1026	0.3556	0.4857
evm.model.scaffold_35.354	0.3534	0.46255
evm.model.scaffold_35.646	0.4468	0.4375
evm.model.scaffold_35.709	0.4566	0.3931
evm.model.scaffold_35.301	0.4139	0.3988
evm.model.scaffold_35.416	0.7077	0.54425
evm.model.scaffold_35.283	0.4312	0.44495
evm.model.scaffold_35.689	0.4452	0.47745
evm.model.scaffold_35.113	0.4056	0.45775
evm.model.scaffold_35.955	0.5957	0.4915
evm.model.scaffold_35.1124	0.2522	0.4174
evm.model.scaffold_35.285	0.441	0.45935
evm.model.scaffold_35.1059	0.4251	0.4786
evm.model.scaffold_35.383	0.4378	0.45855
evm.model.scaffold_35.1090	0.4712	0.4856
evm.model.scaffold_35.248	0.477	0.4253
evm.model.scaffold_35.298	0.4194	0.50355
evm.model.scaffold_35.16	0.3779	0.4172
evm.model.scaffold_35.1139	0.3535	0.51755
evm.model.scaffold_35.1104	0.3123	0.47605
evm.model.scaffold_35.911	0.4499	0.4828
evm.model.scaffold_35.760	0.3528	0.466
evm.model.scaffold_35.386	0.3609	0.47515
evm.model.scaffold_35.342	0.414	0.43665
evm.model.scaffold_35.659	0.5157	0.44025
evm.model.scaffold_35.948	0.3449	0.4204
evm.model.scaffold_35.539	0.346	0.4601
evm.model.scaffold_35.112	0.3729	0.43465
evm.model.scaffold_35.522	0.5314	0.5264
evm.model.scaffold_35.53	0.5234	0.48225
evm.model.scaffold_35.749	0.3677	0.45365
evm.model.scaffold_35.477	0.3834	0.4797
evm.model.scaffold_35.695	0.373	0.4676
evm.model.scaffold_35.712	0.3873	0.42195
evm.model.scaffold_35.411	0.4078	0.43335
evm.model.scaffold_35.55	0.3988	0.42945
evm.model.scaffold_35.1016	0.3029	0.4
evm.model.scaffold_35.404	0.4351	0.4313
evm.model.scaffold_35.101	0.3982	0.4686
evm.model.scaffold_35.138	0.4906	0.4057
evm.model.scaffold_35.495	0.4459	0.4363
evm.model.scaffold_35.469	0.3982	0.44745
evm.model.scaffold_35.917	0.4486	0.57945
evm.model.scaffold_35.803	0.3689	0.52215
evm.model.scaffold_35.1027	0.4206	0.45635
evm.model.scaffold_35.1132	0.3806	0.44405
evm.model.scaffold_35.213	0.3722	0.53845
evm.model.scaffold_35.933	0.5809	0.44165
evm.model.scaffold_35.168	0.4684	0.4962
evm.model.scaffold_35.906	0.3601	0.4497
evm.model.scaffold_35.227	0.5536	0.4821
evm.model.scaffold_35.507	0.3701	0.4395
evm.model.scaffold_35.782	0.3951	0.4669
evm.model.scaffold_35.1181	0.3508	0.49385
evm.model.scaffold_35.643	0.3227	0.4657
evm.model.scaffold_35.772	0.3307	0.42915
evm.model.scaffold_35.855	0.4173	0.4134
evm.model.scaffold_35.413.1	0.4169	0.4823
evm.model.scaffold_35.593	0.4562	0.43235
evm.model.scaffold_35.947	0.373	0.5126
evm.model.scaffold_35.103	0.4133	0.48665
evm.model.scaffold_35.999	0.4968	0.44515
evm.model.scaffold_35.692	0.3446	0.4493
evm.model.scaffold_35.733	0.4419	0.43025
evm.model.scaffold_35.119	0.3671	0.39875
evm.model.scaffold_35.683	0.4009	0.46445
evm.model.scaffold_35.244	0.3914	0.4786
evm.model.scaffold_35.243	0.3436	0.4601
evm.model.scaffold_35.451	0.4311	0.40465
evm.model.scaffold_35.931	0.5634	0.44365
evm.model.scaffold_35.953	0.3625	0.43905
evm.model.scaffold_35.907	0.4822	0.46555
evm.model.scaffold_35.61	0.605	0.4481
evm.model.scaffold_35.338	0.3913	0.40215
evm.model.scaffold_35.105	0.3024	0.5073
evm.model.scaffold_35.1046	0.4456	0.4191
evm.model.scaffold_35.796	0.3878	0.42685
evm.model.scaffold_35.542	0.3819	0.45465
evm.model.scaffold_35.848	0.4615	0.42105
evm.model.scaffold_35.1001	0.3971	0.4644
evm.model.scaffold_35.837	0.3563	0.437
evm.model.scaffold_35.974	0.5155	0.47205
evm.model.scaffold_35.195	0.3632	0.4344
evm.model.scaffold_35.489	0.4693	0.454
evm.model.scaffold_35.197	0.354	0.4587
evm.model.scaffold_35.239	0.3431	0.4623
evm.model.scaffold_35.172	0.5	0.46785
evm.model.scaffold_35.305	0.3876	0.47565
evm.model.scaffold_35.556	0.3559	0.393
evm.model.scaffold_35.600	0.6606	0.5253
evm.model.scaffold_35.832	0.3639	0.4928
evm.model.scaffold_35.478	0.4104	0.4739
evm.model.scaffold_35.820	0.7689	0.51655
evm.model.scaffold_35.209	0.3758	0.47605
evm.model.scaffold_35.86	0.4535	0.4272
evm.model.scaffold_35.1075	0.5394	0.52425
evm.model.scaffold_35.121	0.34	0.3975
evm.model.scaffold_35.1021	0.3737	0.48355
evm.model.scaffold_35.23	0.5056	0.48155
evm.model.scaffold_35.1014	0.387	0.42825
evm.model.scaffold_35.381	0.3133	0.47855
evm.model.scaffold_35.870	0.5017	0.41925
evm.model.scaffold_35.188	0.4646	0.43935
evm.model.scaffold_35.463	0.4545	0.5165
evm.model.scaffold_35.130.3	0.3737	0.44495
evm.model.scaffold_35.392	0.4148	0.51705
evm.model.scaffold_35.586	0.5036	0.43525
evm.model.scaffold_35.943	0.4144	0.42795
evm.model.scaffold_35.11	0.8304	0.5
evm.model.scaffold_35.36	0.4265	0.5206
evm.model.scaffold_35.747	0.381	0.4351
evm.model.scaffold_35.510	0.3609	0.4935
evm.model.scaffold_35.100	0.4574	0.43605
evm.model.scaffold_35.578	0.3266	0.6421
evm.model.scaffold_35.1041	0.3776	0.4741
evm.model.scaffold_35.186	0.371	0.42175
evm.model.scaffold_35.234	0.3742	0.5031
evm.model.scaffold_35.559	0.3878	0.5238
evm.model.scaffold_35.465	0.4136	0.4233
evm.model.scaffold_35.574	0.4629	0.45635
evm.model.scaffold_35.641	0.4537	0.4714
evm.model.scaffold_35.1028	0.7094	0.5342
evm.model.scaffold_35.670	0.5883	0.47635
evm.model.scaffold_35.714	0.3714	0.45235
evm.model.scaffold_35.128	0.4571	0.4049
evm.model.scaffold_35.166	0.444	0.46555
evm.model.scaffold_35.420	0.4197	0.39785
evm.model.scaffold_35.902	0.5292	0.49415
evm.model.scaffold_35.287	0.4109	0.41845
evm.model.scaffold_35.602	0.3462	0.45195
evm.model.scaffold_35.490	0.498	0.43335
evm.model.scaffold_35.407	0.5377	0.51415
evm.model.scaffold_35.502	0.4324	0.41105
evm.model.scaffold_35.986	0.5333	0.5381
evm.model.scaffold_35.224	0.3864	0.44295
evm.model.scaffold_35.871	0.3708	0.50315
evm.model.scaffold_35.620	0.4278	0.475
evm.model.scaffold_35.1058	0.3971	0.4662
evm.model.scaffold_35.1145	0.3652	0.4582
evm.model.scaffold_35.62	0.5556	0.4167
evm.model.scaffold_35.808	0.4419	0.43325
evm.model.scaffold_35.679	0.4046	0.47405
evm.model.scaffold_35.1101	0.4534	0.44875
evm.model.scaffold_35.268	0.359	0.44485
evm.model.scaffold_35.1189	0.4653	0.4132
evm.model.scaffold_35.626	0.4078	0.51095
evm.model.scaffold_35.263	0.2596	0.59325
evm.model.scaffold_35.78	0.4721	0.4631
evm.model.scaffold_35.694.1	0.4181	0.5239
evm.model.scaffold_35.378	0.4459	0.44595
evm.model.scaffold_35.242	0.4096	0.3991
evm.model.scaffold_35.13	0.5566	0.47415
evm.model.scaffold_35.784_evm.model.scaffold_35.785	0.3703	0.43095
evm.model.scaffold_35.630	0.4831	0.45695
evm.model.scaffold_35.710	0.4557	0.4229
evm.model.scaffold_35.286	0.4032	0.43485
evm.model.scaffold_35.1074	0.3884	0.4626
evm.model.scaffold_35.985	0.5706	0.4206
evm.model.scaffold_35.289	0.312	0.496
evm.model.scaffold_35.611	0.4153	0.4915
evm.model.scaffold_35.540	0.5663	0.5211
evm.model.scaffold_35.612	0.4292	0.44635
evm.model.scaffold_35.421	0.3646	0.46615
evm.model.scaffold_35.566	0.44	0.37
evm.model.scaffold_35.373	0.3703	0.47195
evm.model.scaffold_35.236	0.5923	0.5423
evm.model.scaffold_35.756	0.416	0.491
evm.model.scaffold_35.445	0.4436	0.44605
evm.model.scaffold_35.448	0.543	0.49095
evm.model.scaffold_35.757	0.371	0.4816
evm.model.scaffold_35.315	0.4516	0.4355
evm.model.scaffold_35.347	0.432	0.442
evm.model.scaffold_35.38.5	0.4552	0.41605
evm.model.scaffold_35.752	0.3959	0.4462
evm.model.scaffold_35.941	0.4919	0.50805
evm.model.scaffold_35.844	0.4971	0.4912
evm.model.scaffold_35.403	0.4892	0.3885
evm.model.scaffold_35.663	0.4089	0.419
evm.model.scaffold_35.290	0.359	0.41345
evm.model.scaffold_35.481	0.398	0.49505
evm.model.scaffold_35.320	0.6931	0.5
evm.model.scaffold_35.145	0.4141	0.4596
evm.model.scaffold_35.69	0.4979	0.41845
evm.model.scaffold_35.667	0.3568	0.4334
evm.model.scaffold_35.1025	0.4655	0.44895
evm.model.scaffold_35.1037	0.2797	0.47555
evm.model.scaffold_35.690	0.535	0.4775
evm.model.scaffold_35.397	0.5385	0.39425
evm.model.scaffold_35.1005	0.7429	0.51635
evm.model.scaffold_35.1108	0.4145	0.4707
evm.model.scaffold_35.1166	0.3741	0.43165
evm.model.scaffold_35.1164	0.4065	0.39835
evm.model.scaffold_35.162	0.4057	0.4493
evm.model.scaffold_35.564	0.3873	0.51735
evm.model.scaffold_35.864.1	0.3993	0.44695
evm.model.scaffold_35.245	0.4654	0.4189
evm.model.scaffold_35.1022.2	0.382	0.4842
evm.model.scaffold_35.171	0.4741	0.475
evm.model.scaffold_35.618	0.4298	0.45415
evm.model.scaffold_35.535	0.3938	0.49165
evm.model.scaffold_35.575	0.5414	0.4825
evm.model.scaffold_35.909.2	0.39	0.44
evm.model.scaffold_35.674	0.4286	0.47365
evm.model.scaffold_35.362	0.4188	0.43195
evm.model.scaffold_35.123	0.5913	0.38695
evm.model.scaffold_35.660	0.4788	0.41535
evm.model.scaffold_35.743	0.3412	0.4434
evm.model.scaffold_35.671	0.394	0.44345
evm.model.scaffold_35.802	0.4294	0.40925
evm.model.scaffold_35.1019	0.542	0.4084
evm.model.scaffold_35.875	0.3405	0.46055
evm.model.scaffold_35.682	0.4099	0.45495
evm.model.scaffold_35.321	0.396	0.54865
evm.model.scaffold_35.20	0.4061	0.5085
evm.model.scaffold_35.1131	0.388	0.46765
evm.model.scaffold_35.382	0.3743	0.46035
evm.model.scaffold_35.881	0.4502	0.4743
evm.model.scaffold_35.269	0.3525	0.44775
evm.model.scaffold_35.673	0.6619	0.48465
evm.model.scaffold_35.786	0.3667	0.4487
evm.model.scaffold_35.861	0.4775	0.39735
evm.model.scaffold_35.47	0.4426	0.48635
evm.model.scaffold_35.849	0.6268	0.64435
evm.model.scaffold_35.1175	0.2911	0.53795
evm.model.scaffold_35.592	0.4054	0.4527
evm.model.scaffold_35.500	0.3928	0.42555
evm.model.scaffold_35.1044	0.4923	0.41485
evm.model.scaffold_35.821	0.3892	0.45945
evm.model.scaffold_35.255	0.4208	0.42575
evm.model.scaffold_35.499	0.4241	0.4942
evm.model.scaffold_35.157	0.3702	0.4351
evm.model.scaffold_35.621	0.5258	0.40805
evm.model.scaffold_35.253	0.6238	0.48515
evm.model.scaffold_35.932	0.5761	0.4565
evm.model.scaffold_35.853	0.3864	0.38635
evm.model.scaffold_35.41	0.4196	0.4192
evm.model.scaffold_35.292	0.405	0.41745
evm.model.scaffold_35.1127	0.3834	0.4087
evm.model.scaffold_35.1133	0.3795	0.4488
evm.model.scaffold_35.343	0.4522	0.47225
evm.model.scaffold_35.711	0.4277	0.39305
evm.model.scaffold_35.1062	0.8655	0.584
evm.model.scaffold_35.1072	0.3984	0.4614
evm.model.scaffold_35.165	0.3831	0.46765
evm.model.scaffold_35.466	0.3765	0.50085
evm.model.scaffold_35.12	0.4014	0.4607
evm.model.scaffold_35.95	0.5326	0.48155
evm.model.scaffold_35.544	0.3875	0.4377
evm.model.scaffold_35.498	0.4085	0.412
evm.model.scaffold_35.668	0.6901	0.50585
evm.model.scaffold_35.472	0.5158	0.4095
evm.model.scaffold_35.731	0.3733	0.46335
evm.model.scaffold_35.185	0.4755	0.50525
evm.model.scaffold_35.96	0.3708	0.4493
evm.model.scaffold_35.379	0.4688	0.5031
evm.model.scaffold_35.729	0.3855	0.51145
evm.model.scaffold_35.894	0.4502	0.4759
evm.model.scaffold_35.581.1	0.3709	0.45105
evm.model.scaffold_35.267	0.4194	0.4241
evm.model.scaffold_35.25	0.5611	0.4914
evm.model.scaffold_35.751	0.3737	0.43305
evm.model.scaffold_35.346	0.4036	0.4051
evm.model.scaffold_35.792	0.3257	0.4989
evm.model.scaffold_35.520	0.4658	0.44065
evm.model.scaffold_35.205	0.5365	0.5381
evm.model.scaffold_35.76	0.4617	0.4374
evm.model.scaffold_35.279	0.4363	0.4273
evm.model.scaffold_35.926	0.619	0.4947
evm.model.scaffold_35.780	0.5181	0.40525
evm.model.scaffold_35.328	0.4801	0.42965
evm.model.scaffold_35.758	0.4434	0.44345
evm.model.scaffold_35.528	0.413	0.41305
evm.model.scaffold_35.942	0.4002	0.4493
evm.model.scaffold_35.443	0.4201	0.4358
evm.model.scaffold_35.187	0.3571	0.42585
evm.model.scaffold_35.536	0.4141	0.45815
evm.model.scaffold_35.293	0.3482	0.4363
evm.model.scaffold_35.108	0.3837	0.4604
evm.model.scaffold_35.217.2	0.4274	0.42745
evm.model.scaffold_35.601	0.4128	0.4564
evm.model.scaffold_35.547	0.6293	0.47795
evm.model.scaffold_35.122	0.3719	0.4008
evm.model.scaffold_35.329	0.3609	0.4261
evm.model.scaffold_35.262	0.4407	0.40075
evm.model.scaffold_35.116	0.3325	0.45115
evm.model.scaffold_35.823	0.4234	0.5759
evm.model.scaffold_35.850	0.3925	0.3969
evm.model.scaffold_35.1094	0.5021	0.4398
evm.model.scaffold_35.744	0.3476	0.45275
evm.model.scaffold_35.142	0.4282	0.4188
evm.model.scaffold_35.561	0.4496	0.3798
evm.model.scaffold_35.367	0.5378	0.42645
evm.model.scaffold_35.992	0.3951	0.465
evm.model.scaffold_35.252	0.3868	0.51645
evm.model.scaffold_35.419	0.5	0.4495
evm.model.scaffold_35.1020	0.4294	0.42225
evm.model.scaffold_35.231	0.5196	0.44135
evm.model.scaffold_35.155	0.372	0.43275
evm.model.scaffold_35.66	0.385	0.42515
evm.model.scaffold_35.761	0.3394	0.48485
evm.model.scaffold_35.235	0.4264	0.48485
evm.model.scaffold_35.284	0.3825	0.44375
evm.model.scaffold_35.633	0.4685	0.45945
evm.model.scaffold_35.691	0.7535	0.59155
evm.model.scaffold_35.977	0.3531	0.41375
evm.model.scaffold_35.765	0.5547	0.45095
evm.model.scaffold_35.39	0.4407	0.44745
evm.model.scaffold_35.144	0.5255	0.49195
evm.model.scaffold_35.79	0.422	0.4734
evm.model.scaffold_35.1067	0.3804	0.49625
evm.model.scaffold_35.150	0.4068	0.5062
evm.model.scaffold_35.818	0.3819	0.45315
evm.model.scaffold_35.88	0.4675	0.5042
evm.model.scaffold_35.311	0.385	0.448
evm.model.scaffold_35.372	0.3795	0.46385
evm.model.scaffold_35.1076	0.3861	0.44915
evm.model.scaffold_35.787	0.4128	0.439
evm.model.scaffold_35.143	0.3324	0.4858
evm.model.scaffold_35.281	0.433	0.4245
evm.model.scaffold_35.1008	0.4257	0.4743
evm.model.scaffold_35.67	0.4301	0.4301
evm.model.scaffold_35.1100	0.7055	0.47185
evm.model.scaffold_35.87	0.319	0.4892
evm.model.scaffold_35.129	0.4374	0.44375
evm.model.scaffold_35.622	0.5818	0.4894
evm.model.scaffold_35.908	0.4216	0.42345
evm.model.scaffold_35.49	0.4151	0.48335
evm.model.scaffold_35.952	0.3857	0.4642
evm.model.scaffold_35.335.1	0.3562	0.4504
evm.model.scaffold_35.450	0.3884	0.4283
evm.model.scaffold_35.355	0.2295	0.5041
evm.model.scaffold_35.44	0.3824	0.4805
evm.model.scaffold_35.805	0.484	0.4111
evm.model.scaffold_35.198	0.3911	0.50495
evm.model.scaffold_35.764	0.5547	0.45095
evm.model.scaffold_35.99	0.4117	0.4178
evm.model.scaffold_35.351	0.4373	0.538
evm.model.scaffold_35.721	0.3407	0.46295
evm.model.scaffold_35.568	0.3809	0.4206
evm.model.scaffold_35.919	0.616	0.536
evm.model.scaffold_35.852	0.516	0.504
evm.model.scaffold_35.703.1	0.3846	0.4749
evm.model.scaffold_35.135	0.4137	0.5011
evm.model.scaffold_35.793	0.3699	0.5616
evm.model.scaffold_35.84	0.4255	0.4503
evm.model.scaffold_35.550	0.4661	0.37935
evm.model.scaffold_35.833	0.3835	0.4513
evm.model.scaffold_35.624	0.4124	0.4639
evm.model.scaffold_35.488	0.453	0.51285
evm.model.scaffold_35.344	0.4924	0.4015
evm.model.scaffold_35.675	0.6855	0.48385
evm.model.scaffold_35.202	0.49	0.4493
evm.model.scaffold_35.15	0.481	0.5
evm.model.scaffold_35.1129	0.5359	0.4967
evm.model.scaffold_35.414	0.314	0.4922
evm.model.scaffold_35.629	0.4157	0.46845
evm.model.scaffold_35.461	0.3861	0.4749
evm.model.scaffold_35.19	0.4241	0.5013
evm.model.scaffold_35.348	0.4307	0.44975
evm.model.scaffold_35.1102	0.3733	0.50835
evm.model.scaffold_35.85	0.4059	0.4338
evm.model.scaffold_35.1130	0.4884	0.4463
evm.model.scaffold_35.1070	0.386	0.43335
evm.model.scaffold_35.1048	0.4069	0.46155
evm.model.scaffold_35.840	0.3902	0.43035
evm.model.scaffold_35.924	0.4873	0.5327
evm.model.scaffold_35.755	0.7386	0.55555
evm.model.scaffold_35.946	0.3667	0.4685
evm.model.scaffold_35.408	0.3857	0.4738
evm.model.scaffold_35.181	0.7051	0.4327
evm.model.scaffold_35.653	0.4147	0.47295
evm.model.scaffold_35.874	0.3777	0.42315
evm.model.scaffold_35.226	0.5272	0.44705
evm.model.scaffold_35.319	0.4178	0.71335
evm.model.scaffold_35.1150	0.4609	0.4815
evm.model.scaffold_35.3	0.429	0.47585
evm.model.scaffold_35.190	0.4369	0.45495
evm.model.scaffold_35.1171	0.4455	0.46175
evm.model.scaffold_35.847	0.3874	0.40315
evm.model.scaffold_35.745	0.466	0.4645
evm.model.scaffold_35.971	0.5063	0.4887
evm.model.scaffold_35.1040	0.3564	0.4307
evm.model.scaffold_35.737	0.3558	0.53375
evm.model.scaffold_35.846	0.4418	0.43215
evm.model.scaffold_35.401	0.3859	0.44115
evm.model.scaffold_35.115	0.3889	0.4653
evm.model.scaffold_35.371	0.3429	0.41225
evm.model.scaffold_35.811	0.3905	0.43335
evm.model.scaffold_35.806	0.4545	0.45105
evm.model.scaffold_35.788	0.4933	0.45555
evm.model.scaffold_35.8	0.4626	0.4556
evm.model.scaffold_35.688	0.5487	0.4823
evm.model.scaffold_35.458	0.5231	0.4308
evm.model.scaffold_35.1057	0.3396	0.4104
evm.model.scaffold_35.634	0.347	0.43305
evm.model.scaffold_35.210	0.3462	0.41345
evm.model.scaffold_35.759	0.3539	0.4101
evm.model.scaffold_35.24	0.4046	0.50775
evm.model.scaffold_35.801	0.5926	0.4437
evm.model.scaffold_35.783	0.456	0.422
evm.model.scaffold_35.1034	0.3871	0.3763
evm.model.scaffold_35.140	0.3818	0.4409
evm.model.scaffold_35.558	0.4483	0.45565
evm.model.scaffold_35.72	0.3735	0.44755
evm.model.scaffold_35.676	0.719	0.48695
evm.model.scaffold_35.1141	0.3883	0.43445
evm.model.scaffold_35.961	0.4654	0.4738
evm.model.scaffold_35.339	0.4305	0.4863
evm.model.scaffold_35.762	0.533	0.41575
evm.model.scaffold_35.1165	0.4329	0.4665
evm.model.scaffold_35.530	0.4081	0.4275
evm.model.scaffold_35.359	0.3661	0.4777
evm.model.scaffold_35.29	0.4224	0.4938
evm.model.scaffold_35.322	0.3705	0.43945
evm.model.scaffold_35.527	0.4623	0.402
evm.model.scaffold_35.230	0.3529	0.4637
evm.model.scaffold_35.508	0.3524	0.5
evm.model.scaffold_35.1045	0.5769	0.43075
evm.model.scaffold_35.1066	0.6862	0.49435
evm.model.scaffold_35.139	0.3446	0.41525
evm.model.scaffold_35.492	0.5234	0.38785
evm.model.scaffold_35.814	0.4533	0.4338
evm.model.scaffold_35.453	0.513	0.48465
evm.model.scaffold_35.409	0.393	0.47265
evm.model.scaffold_35.2	0.3782	0.4544
evm.model.scaffold_35.825	0.3688	0.4271
evm.model.scaffold_35.482	0.3915	0.4217
evm.model.scaffold_35.291	0.4158	0.4026
evm.model.scaffold_35.395	0.8131	0.50505
evm.model.scaffold_35.925	0.3909	0.45765
evm.model.scaffold_35.964	0.473	0.47515
evm.model.scaffold_35.896	0.5046	0.46785
evm.model.scaffold_35.81	0.3236	0.42955
evm.model.scaffold_35.740.1	0.3917	0.4586
evm.model.scaffold_35.794	0.3707	0.432
evm.model.scaffold_35.1128	0.4064	0.49405
evm.model.scaffold_35.161	0.3413	0.4365
evm.model.scaffold_35.572	0.4178	0.51075
evm.model.scaffold_35.1187	0.5469	0.59765
evm.model.scaffold_35.341	0.3586	0.4519
evm.model.scaffold_35.610	0.5116	0.42245
evm.model.scaffold_35.114	0.362	0.438
evm.model.scaffold_35.496_evm.model.scaffold_35.497	0.3828	0.43445
evm.model.scaffold_35.317	0.3485	0.49245
evm.model.scaffold_35.968	0.7225	0.60285
evm.model.scaffold_35.666	0.5812	0.47415
evm.model.scaffold_35.722	0.5193	0.5561
evm.model.scaffold_35.513	0.3885	0.43315
evm.model.scaffold_35.778	0.5246	0.41135
evm.model.scaffold_35.394	0.3729	0.4822
evm.model.scaffold_35.651	0.481	0.47385
evm.model.scaffold_35.533	0.413	0.4407
evm.model.scaffold_35.278.1	0.3376	0.4973
evm.model.scaffold_35.1188	0.4406	0.45805
evm.model.scaffold_35.59	0.3621	0.44305
evm.model.scaffold_35.370	0.455	0.45115
evm.model.scaffold_35.258	0.352	0.472
evm.model.scaffold_35.944	0.4322	0.4057
evm.model.scaffold_35.797	0.343	0.4454
evm.model.scaffold_35.60	0.4608	0.451
evm.model.scaffold_35.959	0.6987	0.4596
evm.model.scaffold_35.206	0.3874	0.4144
evm.model.scaffold_35.264	0.4106	0.41355
evm.model.scaffold_35.702	0.6187	0.4828
evm.model.scaffold_35.546	0.4706	0.4765
evm.model.scaffold_35.272	0.4043	0.42995
evm.model.scaffold_35.511	0.4241	0.45045
evm.model.scaffold_35.360	0.4743	0.50285
evm.model.scaffold_35.804	0.3806	0.4578
evm.model.scaffold_35.571	0.6211	0.51555
evm.model.scaffold_35.334	0.3765	0.4233
evm.model.scaffold_35.700	0.4678	0.43275
evm.model.scaffold_35.459	0.5235	0.46645
evm.model.scaffold_35.577	0.4898	0.44695
evm.model.scaffold_35.350	0.4229	0.40915
evm.model.scaffold_35.194	0.4015	0.51825
evm.model.scaffold_35.554	0.4811	0.3774
evm.model.scaffold_35.750	0.4077	0.4485
evm.model.scaffold_35.552	0.3615	0.40965
evm.model.scaffold_35.233	0.413	0.41085
evm.model.scaffold_35.352	0.4542	0.4354
evm.model.scaffold_35.886	0.4481	0.4796
evm.model.scaffold_35.363	0.5143	0.41835
evm.model.scaffold_35.1121	0.4104	0.4303
evm.model.scaffold_35.687	0.4433	0.4389
evm.model.scaffold_35.880	0.4048	0.39285
evm.model.scaffold_35.635	0.2991	0.53735
evm.model.scaffold_35.17	0.4728	0.4694
evm.model.scaffold_35.698	0.3923	0.48565
evm.model.scaffold_35.742	0.3942	0.4418
evm.model.scaffold_35.300	0.396	0.42785
evm.model.scaffold_35.815.1	0.3686	0.4534
evm.model.scaffold_35.257	0.4634	0.5122
evm.model.scaffold_35.222	0.3554	0.4008
evm.model.scaffold_35.1033	0.5924	0.56305
evm.model.scaffold_35.90	0.6196	0.5227
evm.model.scaffold_35.175	0.3691	0.4268
evm.model.scaffold_35.22	0.6441	0.46625
evm.model.scaffold_35.259	0.4373	0.40225
evm.model.scaffold_35.1055	0.4925	0.45895
evm.model.scaffold_35.1178	0.4196	0.45585
evm.model.scaffold_35.895	0.4923	0.4423
evm.model.scaffold_35.604	0.4098	0.43525
evm.model.scaffold_35.998	0.3644	0.47455
evm.model.scaffold_35.37	0.572	0.3934
evm.model.scaffold_35.340.3	0.3417	0.47685
evm.model.scaffold_35.271	0.4314	0.4524
evm.model.scaffold_35.164	0.4021	0.455
evm.model.scaffold_35.1052_evm.model.scaffold_35.1053	0.3953	0.45
evm.model.scaffold_35.58	0.3264	0.4938
evm.model.scaffold_35.332	0.3642	0.5
evm.model.scaffold_35.247	0.4058	0.4522
evm.model.scaffold_35.891	0.3679	0.39625
evm.model.scaffold_35.573	0.4915	0.44425
evm.model.scaffold_35.728	0.4798	0.435
evm.model.scaffold_35.625	0.3647	0.44075
evm.model.scaffold_35.537	0.4017	0.4476
evm.model.scaffold_35.447	0.3826	0.4246
evm.model.scaffold_35.306	0.4065	0.42255
evm.model.scaffold_35.442	0.3656	0.47345
evm.model.scaffold_35.900	0.3934	0.4508
evm.model.scaffold_35.879	0.6424	0.6093
evm.model.scaffold_35.1000	0.5244	0.4797
evm.model.scaffold_35.938	0.5526	0.4434
evm.model.scaffold_35.826	0.4553	0.42325
evm.model.scaffold_35.331	0.3952	0.5
evm.model.scaffold_35.126.1	0.35	0.415
evm.model.scaffold_35.658	0.4149	0.43245
evm.model.scaffold_35.184	0.3603	0.4586
evm.model.scaffold_35.460	0.613	0.53595
evm.model.scaffold_35.1018	0.4348	0.45755
evm.model.scaffold_35.628	0.3916	0.44355
evm.model.scaffold_35.1134	0.4485	0.4816
evm.model.scaffold_35.170	0.3534	0.47745
evm.model.scaffold_35.456	0.4136	0.4185
evm.model.scaffold_35.196	0.6297	0.50445
evm.model.scaffold_35.789.1	0.3575	0.4541
evm.model.scaffold_35.830	0.5565	0.4821
evm.model.scaffold_35.43	0.5429	0.44285
evm.model.scaffold_35.650	0.3979	0.5007
evm.model.scaffold_35.735	0.4276	0.4671
evm.model.scaffold_35.983	0.4216	0.43205
evm.model.scaffold_35.412	0.4895	0.50585
evm.model.scaffold_35.726	0.3625	0.47365
evm.model.scaffold_35.387	0.3425	0.41095
evm.model.scaffold_35.576	0.3941	0.46175
evm.model.scaffold_35.1083	0.5878	0.55535
evm.model.scaffold_35.454	0.4123	0.46725
evm.model.scaffold_35.32	0.4087	0.4551
evm.model.scaffold_35.106	0.2957	0.5565
evm.model.scaffold_35.56.2	0.3759	0.45905
evm.model.scaffold_35.494	0.4619	0.38335
evm.model.scaffold_35.484	0.5172	0.54435
evm.model.scaffold_35.868	0.3559	0.5127
evm.model.scaffold_35.1117	0.3667	0.4625
evm.model.scaffold_35.704	0.4406	0.4387
evm.model.scaffold_35.1039	0.3945	0.45615
evm.model.scaffold_35.773	0.3618	0.3857
evm.model.scaffold_35.48	0.3638	0.43495
evm.model.scaffold_35.65	0.3926	0.467
evm.model.scaffold_35.221	0.433	0.4196
evm.model.scaffold_35.669	0.4251	0.46255
evm.model.scaffold_35.863	0.4147	0.41015
evm.model.scaffold_35.989	0.3705	0.4502
evm.model.scaffold_35.154	0.3859	0.4443
evm.model.scaffold_35.915	0.6699	0.62135
evm.model.scaffold_35.156	0.4741	0.4417
evm.model.scaffold_35.930	0.5387	0.4434
evm.model.scaffold_35.441	0.4449	0.47795
evm.model.scaffold_35.410	0.4	0.47145
evm.model.scaffold_35.1123	0.5049	0.39805
evm.model.scaffold_35.169	0.5831	0.45845
evm.model.scaffold_35.28	0.3526	0.46115
evm.model.scaffold_35.1013	0.4821	0.4223
evm.model.scaffold_35.822	0.7778	0.5614
evm.model.scaffold_35.526	0.4219	0.40625
evm.model.scaffold_35.336_evm.model.scaffold_35.337	0.4715	0.53405
evm.model.scaffold_35.1115	0.3367	0.4811
evm.model.scaffold_35.201	0.492	0.45875
evm.model.scaffold_35.824	0.4411	0.58295
evm.model.scaffold_35.406	0.4	0.47
evm.model.scaffold_35.1047	0.4792	0.47225
evm.model.scaffold_35.33	0.4491	0.4375
evm.model.scaffold_35.856	0.4135	0.40925
evm.model.scaffold_35.218_evm.model.scaffold_35.219	0.3524	0.5113
evm.model.scaffold_35.531	0.5106	0.4507
evm.model.scaffold_35.845	0.375	0.43125
evm.model.scaffold_35.665	0.4356	0.40095
evm.model.scaffold_35.1011	0.6456	0.54115
evm.model.scaffold_35.83	0.477	0.4052
evm.model.scaffold_35.501	0.3828	0.41535
evm.model.scaffold_35.644	0.4698	0.4764
evm.model.scaffold_35.216	0.8014	0.46455
evm.model.scaffold_35.316	0.6387	0.48875
evm.model.scaffold_35.57	0.3737	0.47635
evm.model.scaffold_35.485	0.4322	0.4958
evm.model.scaffold_35.570.1	0.3547	0.4698
evm.model.scaffold_35.303	0.4569	0.40085
evm.model.scaffold_35.399	0.3962	0.4409
evm.model.scaffold_35.903	0.3675	0.4818
evm.model.scaffold_35.579	0.4675	0.44515
evm.model.scaffold_35.725	0.4148	0.38885
evm.model.scaffold_35.1142	0.3654	0.44475
evm.model.scaffold_35.591	0.3802	0.47315
evm.model.scaffold_35.70	0.4274	0.4204
evm.model.scaffold_35.970	0.3631	0.5292
evm.model.scaffold_35.323	0.3747	0.45105
evm.model.scaffold_35.681	0.3488	0.48095
evm.model.scaffold_35.487	0.3011	0.43185
evm.model.scaffold_35.124	0.3663	0.41625
evm.model.scaffold_35.46	0.5183	0.50305
evm.model.scaffold_35.127	0.4737	0.4793
evm.model.scaffold_35.1003	0.4646	0.41735
evm.model.scaffold_35.504	0.6131	0.48865
evm.model.scaffold_35.901	0.4244	0.5854
evm.model.scaffold_35.790	0.5771	0.44
evm.model.scaffold_35.325	0.4137	0.4789
evm.model.scaffold_35.35.2	0.3889	0.475
evm.model.scaffold_35.438	0.4353	0.5043
evm.model.scaffold_35.589	0.3372	0.45605
evm.model.scaffold_35.160	0.42	0.395
evm.model.scaffold_35.327	0.4689	0.47455
evm.model.scaffold_35.1125	0.4247	0.4966
evm.model.scaffold_35.280	0.3782	0.47115
evm.model.scaffold_35.829	0.3788	0.47575
evm.model.scaffold_35.117	0.3833	0.3972
evm.model.scaffold_35.104	0.3333	0.4809
evm.model.scaffold_35.455	0.5241	0.46895
evm.model.scaffold_35.182	0.4221	0.43405
evm.model.scaffold_35.467	0.7115	0.41485
evm.model.scaffold_35.276	0.4074	0.48145
evm.model.scaffold_35.232	0.442	0.4296
evm.model.scaffold_35.1190	0.4432	0.4121
evm.model.scaffold_35.64	0.4906	0.42455
evm.model.scaffold_35.869	0.3839	0.51235
evm.model.scaffold_35.418	0.409	0.43245
evm.model.scaffold_35.739	0.4276	0.45065
evm.model.scaffold_35.678	0.4667	0.4148
evm.model.scaffold_35.1186	0.4126	0.4235
evm.model.scaffold_35.706	0.3756	0.4244
evm.model.scaffold_35.159	0.4228	0.4597
evm.model.scaffold_35.538	0.4766	0.49105
evm.model.scaffold_35.649	0.3766	0.4264
evm.model.scaffold_35.807	0.3921	0.47185
evm.model.scaffold_35.153	0.4299	0.4816
evm.model.scaffold_35.693	0.3884	0.4604
evm.model.scaffold_35.294	0.4394	0.4759
evm.model.scaffold_35.877	0.5068	0.5226
evm.model.scaffold_35.374	0.4134	0.44685
evm.model.scaffold_35.193	0.4738	0.45465
evm.model.scaffold_35.1043	0.3701	0.4383
evm.model.scaffold_35.431	0.3744	0.4532
evm.model.scaffold_35.763	0.4559	0.4225
evm.model.scaffold_35.275	0.3424	0.46195
evm.model.scaffold_35.167	0.3474	0.42105
evm.model.scaffold_35.345	0.4675	0.47635
evm.model.scaffold_35.1097	0.4434	0.45085
evm.model.scaffold_35.229	0.3522	0.4588
evm.model.scaffold_35.738	0.394	0.4538
evm.model.scaffold_35.512	0.3653	0.4557
evm.model.scaffold_35.1004	0.4273	0.5125
evm.model.scaffold_35.313	0.4133	0.5448
evm.model.scaffold_35.962	0.4603	0.47905
evm.model.scaffold_35.211	0.4048	0.47815
evm.model.scaffold_35.256	0.4529	0.4353
evm.model.scaffold_35.587	0.5781	0.58865
evm.model.scaffold_35.377	0.4447	0.44595
evm.model.scaffold_35.1170	0.65	0.4625
evm.model.scaffold_35.146	0.3981	0.44905
evm.model.scaffold_35.940	0.4257	0.47525
evm.model.scaffold_35.452.1	0.6975	0.46975
evm.model.scaffold_35.203	0.3962	0.42765
evm.model.scaffold_35.727	0.4345	0.46955
evm.model.scaffold_35.333.1	0.4183	0.4468
evm.model.scaffold_35.990	0.3368	0.45725
evm.model.scaffold_35.736	0.4206	0.3832
evm.model.scaffold_35.1010	0.3254	0.46005
evm.model.scaffold_35.555	0.4023	0.34765
evm.model.scaffold_35.655	0.3897	0.4461
evm.model.scaffold_35.724	0.2885	0.47595
evm.model.scaffold_35.208	0.6408	0.5023
evm.model.scaffold_35.474	0.3523	0.4354
evm.model.scaffold_35.274	0.4828	0.4532
evm.model.scaffold_35.1158	0.3628	0.40275
evm.model.scaffold_35.828	0.3724	0.4038
evm.model.scaffold_35.748	0.4161	0.3851
evm.model.scaffold_35.199	0.5062	0.46295
evm.model.scaffold_35.246	0.4059	0.48525
evm.model.scaffold_35.1159	0.4033	0.44125
evm.model.scaffold_35.708	0.4512	0.4207
evm.model.scaffold_35.799	0.4137	0.4345
evm.model.scaffold_35.798	0.5897	0.38145
evm.model.scaffold_35.569	0.6079	0.5258
evm.model.scaffold_35.632	0.4874	0.4314
evm.model.scaffold_35.672	0.3422	0.3894
evm.model.scaffold_35.207	0.623	0.60715
evm.model.scaffold_35.405	0.5057	0.4377
evm.model.scaffold_35.1157	0.6265	0.508
evm.model.scaffold_35.214	0.4738	0.4825
evm.model.scaffold_35.951	0.5711	0.4742
evm.model.scaffold_35.109	0.7406	0.59905
evm.model.scaffold_35.324	0.4318	0.5112
evm.model.scaffold_35.149	0.4769	0.4654
evm.model.scaffold_35.912	0.7072	0.54975
evm.model.scaffold_35.125	0.4714	0.4357
evm.model.scaffold_35.791	0.625	0.44165
evm.model.scaffold_35.204	0.5993	0.55865
evm.model.scaffold_35.1088	0.3987	0.41835
evm.model.scaffold_35.31	0.4688	0.4453
evm.model.scaffold_35.491	0.4928	0.42105
evm.model.scaffold_35.228	0.4033	0.4464
evm.model.scaffold_35.627	0.3974	0.40985
evm.model.scaffold_35.565	0.3697	0.4303
evm.model.scaffold_35.1167	0.5812	0.49085
evm.model.scaffold_35.640	0.3893	0.47335
evm.model.scaffold_35.425	0.4607	0.45285
evm.model.scaffold_35.326	0.3963	0.4451
evm.model.scaffold_35.91	0.5722	0.49355
evm.model.scaffold_35.1071	0.55	0.42085
evm.model.scaffold_35.282	0.3516	0.4478
evm.model.scaffold_35.1035	0.3907	0.39405
evm.model.scaffold_35.174	0.4028	0.4579
evm.model.scaffold_35.813	0.3759	0.40425
evm.model.scaffold_35.519	0.402	0.43215
evm.model.scaffold_35.543	0.5817	0.45615
evm.model.scaffold_35.741	0.5593	0.42375
evm.model.scaffold_35.746	0.4167	0.45835
evm.model.scaffold_35.563	0.3824	0.4228
evm.model.scaffold_35.212	0.7333	0.5833
evm.model.scaffold_35.179	0.4406	0.45295
evm.model.scaffold_35.356	0.3579	0.4703
evm.model.scaffold_35.1162	0.4645	0.4226
evm.model.scaffold_35.680	0.3341	0.4319
evm.model.scaffold_35.584	0.5	0.43015
evm.model.scaffold_35.966	0.4004	0.4644
evm.model.scaffold_35.516	0.4434	0.45285
evm.model.scaffold_35.424	0.339	0.4576
evm.model.scaffold_35.75.1	0.4021	0.62375
evm.model.scaffold_35.435	0.3374	0.46665
evm.model.scaffold_35.439	0.3678	0.46645
evm.model.scaffold_35.241	0.3558	0.454
evm.model.scaffold_35.457	0.4504	0.39695
evm.model.scaffold_35.426	0.4417	0.45
evm.model.scaffold_35.238	0.3676	0.45585
evm.model.scaffold_35.596	0.6071	0.46875
evm.model.scaffold_35.483	0.4213	0.40105
evm.model.scaffold_35.514	0.4737	0.59215
evm.model.scaffold_35.200	0.3655	0.48475
evm.model.scaffold_35.173	0.3828	0.3971
evm.model.scaffold_35.551	0.4277	0.44025
evm.model.scaffold_35.810	0.4382	0.43625
evm.model.scaffold_35.14	0.6124	0.54265
evm.model.scaffold_35.505	0.4004	0.4255
evm.model.scaffold_35.685_evm.model.scaffold_35.686	0.4433	0.4424
evm.model.scaffold_35.357	0.4798	0.43265
evm.model.scaffold_35.45	0.4389	0.4599
evm.model.scaffold_35.866	0.4406	0.45885
evm.model.scaffold_35.178	0.4397	0.53785
evm.model.scaffold_35.223	0.3323	0.4672
evm.model.scaffold_35.754	0.3588	0.5
evm.model.scaffold_35.771	0.3623	0.47105
evm.model.scaffold_35.532	0.5514	0.55605
evm.model.scaffold_35.1017	0.6772	0.4703
evm.model.scaffold_35.375	0.3687	0.486
evm.model.scaffold_35.7	0.35	0.45225
evm.model.scaffold_35.1140	0.3502	0.5046
evm.model.scaffold_35.1080	0.5299	0.4741
evm.model.scaffold_35.240	0.3301	0.4401
evm.model.scaffold_35.1086	0.4304	0.4905
evm.model.scaffold_35.654	0.5254	0.4841
evm.model.scaffold_35.607	0.7679	0.38835
evm.model.scaffold_35.77	0.4134	0.4616
evm.model.scaffold_35.237	0.3066	0.48175
evm.model.scaffold_35.220	0.444	0.4925
evm.model.scaffold_35.376	0.4036	0.41225
evm.model.scaffold_35.1002	0.4171	0.39435
evm.model.scaffold_35.1099	0.3665	0.4788
evm.model.scaffold_35.541	0.6203	0.48735
evm.model.scaffold_35.1160	0.4427	0.44275
evm.model.scaffold_35.158	0.3919	0.5
evm.model.scaffold_35.603	0.3723	0.44245
evm.model.scaffold_259.1	0.3959	0.31725
evm.model.scaffold_259.7	0.6018	0.4513
evm.model.scaffold_259.4_evm.model.scaffold_259.5	0.3581	0.45455
evm.model.scaffold_259.2	0.6248	0.4784
evm.model.scaffold_408.5	0.3277	0.4846
evm.model.scaffold_408.4	0.6216	0.49625
evm.model.scaffold_408.3.1	0.358	0.44855
evm.model.scaffold_408.2	0.3741	0.4863
evm.model.scaffold_408.1	0.4933	0.47985
evm.model.scaffold_135.9	0.3706	0.44255
evm.model.scaffold_135.3	0.4957	0.4159
evm.model.scaffold_135.1	0.5094	0.46925
evm.model.scaffold_135.5	0.5519	0.4443
evm.model.scaffold_135.4	0.4895	0.4342
evm.model.scaffold_135.11	0.3772	0.48385
evm.model.scaffold_135.6	0.3868	0.495
evm.model.scaffold_135.8	0.3746	0.46655
evm.model.scaffold_135.7	0.4451	0.4423
evm.model.scaffold_135.2	0.402	0.7353
evm.model.scaffold_99.40	0.4201	0.48205
evm.model.scaffold_99.54	0.3846	0.36435
evm.model.scaffold_99.58	0.3894	0.4996
evm.model.scaffold_99.23	0.5709	0.44885
evm.model.scaffold_99.21	0.3795	0.4668
evm.model.scaffold_99.65	0.3927	0.4338
evm.model.scaffold_99.9	0.5055	0.5166
evm.model.scaffold_99.44	0.486	0.43615
evm.model.scaffold_99.39	0.7319	0.47795
evm.model.scaffold_99.64	0.4615	0.472
evm.model.scaffold_99.24	0.4815	0.49535
evm.model.scaffold_99.26	0.5168	0.4799
evm.model.scaffold_99.8	0.4197	0.4452
evm.model.scaffold_99.43	0.3597	0.45935
evm.model.scaffold_99.57	0.7106	0.545
evm.model.scaffold_99.42	0.3643	0.41425
evm.model.scaffold_99.59	0.4734	0.45685
evm.model.scaffold_99.45	0.5299	0.49005
evm.model.scaffold_99.20	0.5263	0.4379
evm.model.scaffold_99.79	0.5768	0.4429
evm.model.scaffold_99.74	0.3801	0.45715
evm.model.scaffold_99.37	0.7896	0.47395
evm.model.scaffold_99.55	0.3871	0.38475
evm.model.scaffold_99.51	0.5248	0.48565
evm.model.scaffold_99.28	0.4623	0.51145
evm.model.scaffold_99.56	0.3665	0.44305
evm.model.scaffold_99.75	0.4146	0.5229
evm.model.scaffold_99.19	0.3588	0.3855
evm.model.scaffold_99.25	0.3838	0.47185
evm.model.scaffold_99.52	0.3975	0.3873
evm.model.scaffold_99.70	0.3664	0.48645
evm.model.scaffold_99.12	0.5612	0.4358
evm.model.scaffold_99.31	0.381	0.4456
evm.model.scaffold_99.68	0.4083	0.41665
evm.model.scaffold_99.36	0.6328	0.5045
evm.model.scaffold_99.41	0.5261	0.4739
evm.model.scaffold_99.16	0.4651	0.50775
evm.model.scaffold_99.29	0.4724	0.4685
evm.model.scaffold_99.78	0.3829	0.44795
evm.model.scaffold_99.80	0.4194	0.4337
evm.model.scaffold_99.13	0.4131	0.4503
evm.model.scaffold_99.53	0.4474	0.4303
evm.model.scaffold_99.30	0.4174	0.3696
evm.model.scaffold_99.10	0.4265	0.4608
evm.model.scaffold_99.33	0.369	0.436
evm.model.scaffold_99.5	0.5708	0.48035
evm.model.scaffold_99.73	0.5304	0.4619
evm.model.scaffold_99.67	0.5134	0.48215
evm.model.scaffold_99.18	0.3685	0.46495
evm.model.scaffold_99.62	0.5796	0.5286
evm.model.scaffold_99.60	0.4975	0.52105
evm.model.scaffold_99.48	0.7374	0.53915
evm.model.scaffold_99.34	0.5819	0.45475
evm.model.scaffold_99.22	0.385	0.47545
evm.model.scaffold_99.63	0.4994	0.4539
evm.model.scaffold_99.15	0.5404	0.51655
evm.model.scaffold_99.46	0.4495	0.43115
evm.model.scaffold_157.9	0.304	0.43185
evm.model.scaffold_157.13	0.5	0.51925
evm.model.scaffold_157.8	0.486	0.50935
evm.model.scaffold_157.7	0.459	0.43385
evm.model.scaffold_157.17	0.4017	0.42485
evm.model.scaffold_157.16	0.3664	0.5049
evm.model.scaffold_157.4	0.3054	0.4812
evm.model.scaffold_157.10	0.5983	0.51525
evm.model.scaffold_157.12	0.2857	0.42105
evm.model.scaffold_157.2	0.3298	0.4521
evm.model.scaffold_157.6	0.4027	0.51325
evm.model.scaffold_180.1	0.5179	0.5625
evm.model.scaffold_311.23	0.3905	0.48685
evm.model.scaffold_311.41	0.6828	0.5
evm.model.scaffold_311.9	0.6067	0.51285
evm.model.scaffold_311.4	0.3687	0.49725
evm.model.scaffold_311.18	0.4495	0.48165
evm.model.scaffold_311.34	0.3569	0.4781
evm.model.scaffold_311.5	0.3994	0.43365
evm.model.scaffold_311.10	0.3748	0.4168
evm.model.scaffold_311.32	0.4266	0.4612
evm.model.scaffold_311.29	0.5816	0.61705
evm.model.scaffold_311.40	0.382	0.40555
evm.model.scaffold_311.15	0.4369	0.4563
evm.model.scaffold_311.24	0.3516	0.5522
evm.model.scaffold_311.36	0.399	0.44195
evm.model.scaffold_311.30	0.375	0.475
evm.model.scaffold_311.20	0.4248	0.436
evm.model.scaffold_311.28	0.4037	0.40825
evm.model.scaffold_311.31	0.4093	0.4958
evm.model.scaffold_311.19	0.4056	0.4361
evm.model.scaffold_311.45	0.4	0.4235
evm.model.scaffold_311.2	0.3553	0.4502
evm.model.scaffold_334.7	0.4587	0.5413
evm.model.scaffold_334.6	0.4524	0.4429
evm.model.scaffold_334.2	0.5043	0.4513
evm.model.scaffold_334.1_evm.model.scaffold_334.17	0.4351	0.4551
evm.model.scaffold_334.3	0.3641	0.4216
evm.model.scaffold_334.9	0.5085	0.4754
evm.model.scaffold_334.10	0.5407	0.45235
evm.model.scaffold_334.5	0.5603	0.46315
evm.model.scaffold_375.676	0.4878	0.42925
evm.model.scaffold_375.296	0.432	0.47585
evm.model.scaffold_375.317	0.4426	0.47675
evm.model.scaffold_375.72	0.4385	0.4821
evm.model.scaffold_375.440	0.603	0.4527
evm.model.scaffold_375.38	0.4237	0.4626
evm.model.scaffold_375.111	0.6834	0.5148
evm.model.scaffold_375.493	0.3881	0.4501
evm.model.scaffold_375.349	0.3887	0.43595
evm.model.scaffold_375.101_evm.model.scaffold_375.102	0.4342	0.46395
evm.model.scaffold_375.355	0.598	0.5588
evm.model.scaffold_375.107	0.3994	0.5146
evm.model.scaffold_375.206	0.5067	0.46
evm.model.scaffold_375.759	0.3569	0.56275
evm.model.scaffold_375.385	0.5522	0.50765
evm.model.scaffold_375.402	0.4367	0.40835
evm.model.scaffold_375.76	0.5077	0.41535
evm.model.scaffold_375.448	0.445	0.46295
evm.model.scaffold_375.407	0.429	0.4457
evm.model.scaffold_375.524	0.3065	0.46235
evm.model.scaffold_375.530	0.407	0.4627
evm.model.scaffold_375.570	0.3729	0.4181
evm.model.scaffold_375.113	0.7446	0.60435
evm.model.scaffold_375.171	0.5245	0.40935
evm.model.scaffold_375.484	0.4286	0.4762
evm.model.scaffold_375.122	0.402	0.45015
evm.model.scaffold_375.351	0.4922	0.4335
evm.model.scaffold_375.630	0.4098	0.4951
evm.model.scaffold_375.239	0.7909	0.5399
evm.model.scaffold_375.292	0.3902	0.44505
evm.model.scaffold_375.712	0.3564	0.4812
evm.model.scaffold_375.224	0.3929	0.437
evm.model.scaffold_375.348	0.3746	0.444
evm.model.scaffold_375.495	0.3907	0.4927
evm.model.scaffold_375.453	0.3897	0.42645
evm.model.scaffold_375.545	0.3362	0.45745
evm.model.scaffold_375.504	0.3909	0.4408
evm.model.scaffold_375.779	0.375	0.45535
evm.model.scaffold_375.360	0.4897	0.44795
evm.model.scaffold_375.633	0.3955	0.4122
evm.model.scaffold_375.679	0.3823	0.5086
evm.model.scaffold_375.496	0.3874	0.4673
evm.model.scaffold_375.32	0.376	0.4535
evm.model.scaffold_375.287	0.4163	0.42825
evm.model.scaffold_375.300	0.4714	0.489
evm.model.scaffold_375.189	0.5333	0.3667
evm.model.scaffold_375.731	0.3696	0.45655
evm.model.scaffold_375.628	0.4107	0.39955
evm.model.scaffold_375.222	0.4151	0.4497
evm.model.scaffold_375.401	0.4384	0.33905
evm.model.scaffold_375.621	0.5082	0.39345
evm.model.scaffold_375.69	0.4264	0.4264
evm.model.scaffold_375.764	0.4267	0.4558
evm.model.scaffold_375.243	0.4966	0.53965
evm.model.scaffold_375.2	0.6085	0.5058
evm.model.scaffold_375.770	0.3973	0.4933
evm.model.scaffold_375.649.2	0.4313	0.4893
evm.model.scaffold_375.64.2	0.6118	0.49835
evm.model.scaffold_375.609	0.4087	0.5
evm.model.scaffold_375.575	0.4425	0.42255
evm.model.scaffold_375.608	0.4402	0.4942
evm.model.scaffold_375.720	0.453	0.5057
evm.model.scaffold_375.417	0.4583	0.4539
evm.model.scaffold_375.774	0.6061	0.42045
evm.model.scaffold_375.176	0.4188	0.39845
evm.model.scaffold_375.536	0.5161	0.4637
evm.model.scaffold_375.410	0.3621	0.45605
evm.model.scaffold_375.364	0.4748	0.44655
evm.model.scaffold_375.177	0.336	0.50395
evm.model.scaffold_375.331	0.4721	0.44135
evm.model.scaffold_375.714	0.4714	0.375
evm.model.scaffold_375.28	0.4735	0.49585
evm.model.scaffold_375.474	0.4327	0.4703
evm.model.scaffold_375.483	0.5268	0.5561
evm.model.scaffold_375.645	0.4217	0.41525
evm.model.scaffold_375.523	0.3383	0.46255
evm.model.scaffold_375.40	0.8137	0.47055
evm.model.scaffold_375.232	0.4313	0.4313
evm.model.scaffold_375.555	0.4379	0.4314
evm.model.scaffold_375.604	0.4846	0.4423
evm.model.scaffold_375.229	0.4082	0.50245
evm.model.scaffold_375.314	0.3864	0.5085
evm.model.scaffold_375.625	0.3359	0.47035
evm.model.scaffold_375.244	0.3559	0.49685
evm.model.scaffold_375.42	0.3762	0.44045
evm.model.scaffold_375.26	0.3819	0.42815
evm.model.scaffold_375.639	0.4228	0.3943
evm.model.scaffold_375.485	0.4274	0.55605
evm.model.scaffold_375.290	0.5378	0.50725
evm.model.scaffold_375.215	0.6436	0.49255
evm.model.scaffold_375.632	0.4626	0.4295
evm.model.scaffold_375.367	0.3292	0.4503
evm.model.scaffold_375.716	0.5	0.48045
evm.model.scaffold_375.527.1	0.45	0.42
evm.model.scaffold_375.233	0.3401	0.48885
evm.model.scaffold_375.105	0.3059	0.45585
evm.model.scaffold_375.285	0.4272	0.4952
evm.model.scaffold_375.11	0.4019	0.43925
evm.model.scaffold_375.168	0.3824	0.46715
evm.model.scaffold_375.684	0.4722	0.45555
evm.model.scaffold_375.207	0.512	0.47
evm.model.scaffold_375.592	0.3665	0.42235
evm.model.scaffold_375.664	0.3861	0.36135
evm.model.scaffold_375.744	0.4387	0.4758
evm.model.scaffold_375.155	0.4054	0.45335
evm.model.scaffold_375.240	0.4328	0.49625
evm.model.scaffold_375.179	0.3869	0.4586
evm.model.scaffold_375.88	0.4796	0.4388
evm.model.scaffold_375.603	0.5127	0.5053
evm.model.scaffold_375.476	0.645	0.62405
evm.model.scaffold_375.65	0.3822	0.47935
evm.model.scaffold_375.341.1	0.3822	0.48
evm.model.scaffold_375.15	0.3607	0.4491
evm.model.scaffold_375.518	0.3676	0.45655
evm.model.scaffold_375.108	0.453	0.4176
evm.model.scaffold_375.270	0.4406	0.43115
evm.model.scaffold_375.499	0.5115	0.42175
evm.model.scaffold_375.241	0.3453	0.47055
evm.model.scaffold_375.217	0.4706	0.5
evm.model.scaffold_375.228	0.3554	0.44775
evm.model.scaffold_375.262	0.4263	0.45295
evm.model.scaffold_375.129	0.3333	0.30885
evm.model.scaffold_375.460.2	0.3398	0.46685
evm.model.scaffold_375.656	0.5305	0.42175
evm.model.scaffold_375.181	0.4959	0.42075
evm.model.scaffold_375.192	0.507	0.4805
evm.model.scaffold_375.8	0.6283	0.4764
evm.model.scaffold_375.124	0.7088	0.55495
evm.model.scaffold_375.333	0.3264	0.4414
evm.model.scaffold_375.4	0.4717	0.4811
evm.model.scaffold_375.542	0.4574	0.49825
evm.model.scaffold_375.202	0.3742	0.49525
evm.model.scaffold_375.237	0.3929	0.49105
evm.model.scaffold_375.46	0.4199	0.42785
evm.model.scaffold_375.580	0.4292	0.43305
evm.model.scaffold_375.58	0.392	0.48495
evm.model.scaffold_375.650	0.4874	0.4693
evm.model.scaffold_375.403	0.4222	0.4389
evm.model.scaffold_375.114	0.7483	0.46355
evm.model.scaffold_375.681	0.358	0.5039
evm.model.scaffold_375.703	0.5615	0.38465
evm.model.scaffold_375.56	0.3887	0.50645
evm.model.scaffold_375.444	0.4503	0.5329
evm.model.scaffold_375.607.3	0.4757	0.48505
evm.model.scaffold_375.384	0.5094	0.4481
evm.model.scaffold_375.338	0.3072	0.4389
evm.model.scaffold_375.415	0.4513	0.46915
evm.model.scaffold_375.457	0.6256	0.4867
evm.model.scaffold_375.325	0.7027	0.5
evm.model.scaffold_375.480	0.4959	0.46345
evm.model.scaffold_375.562	0.5727	0.51635
evm.model.scaffold_375.205	0.3891	0.44035
evm.model.scaffold_375.400	0.3761	0.40745
evm.model.scaffold_375.173	0.3761	0.4786
evm.model.scaffold_375.245	0.3878	0.41665
evm.model.scaffold_375.146	0.5542	0.5207
evm.model.scaffold_375.303.3	0.375	0.4075
evm.model.scaffold_375.211	0.4298	0.4547
evm.model.scaffold_375.404	0.4038	0.4682
evm.model.scaffold_375.528	0.393	0.44065
evm.model.scaffold_375.638	0.3772	0.43795
evm.model.scaffold_375.471	0.5615	0.503
evm.model.scaffold_375.739	0.3793	0.4828
evm.model.scaffold_375.196	0.3642	0.46495
evm.model.scaffold_375.477	0.734	0.5452
evm.model.scaffold_375.517	0.5026	0.5078
evm.model.scaffold_375.186	0.4939	0.40205
evm.model.scaffold_375.567	0.3665	0.4649
evm.model.scaffold_375.624	0.4595	0.36485
evm.model.scaffold_375.550	0.5128	0.42575
evm.model.scaffold_375.773	0.3906	0.47975
evm.model.scaffold_375.139	0.4184	0.4468
evm.model.scaffold_375.132	0.5165	0.47315
evm.model.scaffold_375.516	0.3872	0.44705
evm.model.scaffold_375.138	0.392	0.4
evm.model.scaffold_375.183	0.4653	0.4
evm.model.scaffold_375.123	0.5167	0.44405
evm.model.scaffold_375.582	0.5546	0.4622
evm.model.scaffold_375.188	0.3926	0.4673
evm.model.scaffold_375.197	0.4747	0.4288
evm.model.scaffold_375.399	0.4962	0.4122
evm.model.scaffold_375.558	0.4109	0.4273
evm.model.scaffold_375.301	0.4143	0.43795
evm.model.scaffold_375.777	0.4673	0.4626
evm.model.scaffold_375.169	0.4045	0.4347
evm.model.scaffold_375.170	0.3593	0.45505
evm.model.scaffold_375.143.1	0.3794	0.46175
evm.model.scaffold_375.95	0.3889	0.46295
evm.model.scaffold_375.283	0.5825	0.55825
evm.model.scaffold_375.704	0.5448	0.44775
evm.model.scaffold_375.749	0.4974	0.4613
evm.model.scaffold_375.564	0.4786	0.44785
evm.model.scaffold_375.96	0.5284	0.5071
evm.model.scaffold_375.185	0.4276	0.4276
evm.model.scaffold_375.781	0.4809	0.4733
evm.model.scaffold_375.289	0.4005	0.46855
evm.model.scaffold_375.675	0.3511	0.47795
evm.model.scaffold_375.510	0.4255	0.42025
evm.model.scaffold_375.266	0.3588	0.42875
evm.model.scaffold_375.87	0.5431	0.44395
evm.model.scaffold_375.618	0.4514	0.4047
evm.model.scaffold_375.119	0.3751	0.4352
evm.model.scaffold_375.277	0.4159	0.4346
evm.model.scaffold_375.212	0.3665	0.46985
evm.model.scaffold_375.234	0.4395	0.46415
evm.model.scaffold_375.396	0.4286	0.4486
evm.model.scaffold_375.394	0.5095	0.4763
evm.model.scaffold_375.216.1	0.3379	0.47625
evm.model.scaffold_375.318	0.4461	0.47955
evm.model.scaffold_375.619	0.5287	0.42515
evm.model.scaffold_375.775	0.4	0.485
evm.model.scaffold_375.291	0.3393	0.5
evm.model.scaffold_375.16	0.432	0.4575
evm.model.scaffold_375.511	0.3499	0.48435
evm.model.scaffold_375.765	0.4159	0.4558
evm.model.scaffold_375.116	0.734	0.5027
evm.model.scaffold_375.487	0.6049	0.45365
evm.model.scaffold_375.323	0.4463	0.4347
evm.model.scaffold_375.688	0.6259	0.5102
evm.model.scaffold_375.544	0.4502	0.4689
evm.model.scaffold_375.734	0.3853	0.4307
evm.model.scaffold_375.195	0.6211	0.45
evm.model.scaffold_375.335	0.358	0.43535
evm.model.scaffold_375.507	0.655	0.57455
evm.model.scaffold_375.556	0.4694	0.44135
evm.model.scaffold_375.261.1	0.3905	0.44155
evm.model.scaffold_375.722	0.3541	0.4416
evm.model.scaffold_375.13	0.5992	0.49795
evm.model.scaffold_375.320	0.3327	0.47875
evm.model.scaffold_375.594	0.4852	0.45575
evm.model.scaffold_375.279	0.4209	0.47885
evm.model.scaffold_375.24	0.4424	0.4411
evm.model.scaffold_375.191	0.4375	0.46225
evm.model.scaffold_375.687	0.4138	0.4335
evm.model.scaffold_375.395	0.4899	0.48985
evm.model.scaffold_375.115	0.4671	0.46825
evm.model.scaffold_375.145	0.3592	0.4539
evm.model.scaffold_375.392	0.4633	0.45685
evm.model.scaffold_375.361	0.3782	0.4496
evm.model.scaffold_375.251	0.4359	0.4573
evm.model.scaffold_375.7	0.3717	0.45755
evm.model.scaffold_375.273	0.4118	0.5343
evm.model.scaffold_375.117	0.4192	0.48205
evm.model.scaffold_375.602.1	0.5623	0.47975
evm.model.scaffold_375.509	0.5117	0.5161
evm.model.scaffold_375.644	0.4	0.3909
evm.model.scaffold_375.469	0.346	0.4455
evm.model.scaffold_375.278	0.4461	0.4201
evm.model.scaffold_375.479	0.4777	0.43155
evm.model.scaffold_375.501.1	0.4167	0.49575
evm.model.scaffold_375.533	0.4108	0.42835
evm.model.scaffold_375.166	0.4444	0.43365
evm.model.scaffold_375.47.5	0.4064	0.45075
evm.model.scaffold_375.147	0.3232	0.4521
evm.model.scaffold_375.506	0.4029	0.4709
evm.model.scaffold_375.293	0.4006	0.4356
evm.model.scaffold_375.573	0.3846	0.48715
evm.model.scaffold_375.9	0.4847	0.439
evm.model.scaffold_375.652	0.6835	0.54315
evm.model.scaffold_375.719	0.4091	0.39395
evm.model.scaffold_375.631	0.3429	0.49525
evm.model.scaffold_375.747	0.4937	0.4748
evm.model.scaffold_375.534	0.3568	0.46235
evm.model.scaffold_375.60	0.5387	0.5286
evm.model.scaffold_375.389	0.6104	0.4782
evm.model.scaffold_375.737	0.38	0.46
evm.model.scaffold_375.634	0.2727	0.46695
evm.model.scaffold_375.156.2	0.415	0.39695
evm.model.scaffold_375.657	0.4779	0.42225
evm.model.scaffold_375.581	0.3983	0.4526
evm.model.scaffold_375.67	0.439	0.4486
evm.model.scaffold_375.470	0.5294	0.4444
evm.model.scaffold_375.599	0.4742	0.45365
evm.model.scaffold_375.467	0.3326	0.44175
evm.model.scaffold_375.472	0.6389	0.5104
evm.model.scaffold_375.780	0.4986	0.52755
evm.model.scaffold_375.363	0.5093	0.45215
evm.model.scaffold_375.160	0.7476	0.4903
evm.model.scaffold_375.512	0.3333	0.49585
evm.model.scaffold_375.99	0.4354	0.4779
evm.model.scaffold_375.623	0.4896	0.4297
evm.model.scaffold_375.5	0.517	0.4582
evm.model.scaffold_375.651	0.6208	0.46345
evm.model.scaffold_375.97	0.5299	0.42575
evm.model.scaffold_375.689	0.3458	0.4646
evm.model.scaffold_375.255	0.3783	0.464
evm.model.scaffold_375.427	0.3973	0.42325
evm.model.scaffold_375.591	0.5305	0.56805
evm.model.scaffold_375.327	0.5556	0.3972
evm.model.scaffold_375.200	0.3994	0.46845
evm.model.scaffold_375.468	0.3584	0.50355
evm.model.scaffold_375.248	0.4576	0.45125
evm.model.scaffold_375.311	0.526	0.48375
evm.model.scaffold_375.616	0.3534	0.4774
evm.model.scaffold_375.6	0.4184	0.40795
evm.model.scaffold_375.125	0.4295	0.39745
evm.model.scaffold_375.187	0.4837	0.42275
evm.model.scaffold_375.520	0.5071	0.3964
evm.model.scaffold_375.148	0.3211	0.47705
evm.model.scaffold_375.309	0.4552	0.4067
evm.model.scaffold_375.150	0.4436	0.4592
evm.model.scaffold_375.334	0.4017	0.4373
evm.model.scaffold_375.491	0.5632	0.4795
evm.model.scaffold_375.626	0.4074	0.4624
evm.model.scaffold_375.44	0.6019	0.3704
evm.model.scaffold_375.23	0.4286	0.4286
evm.model.scaffold_375.332	0.4413	0.4492
evm.model.scaffold_375.49	0.4156	0.4091
evm.model.scaffold_375.718	0.342	0.441
evm.model.scaffold_375.118	0.369	0.5087
evm.model.scaffold_375.158	0.4475	0.45685
evm.model.scaffold_375.288	0.6564	0.51035
evm.model.scaffold_375.135	0.298	0.4798
evm.model.scaffold_375.398	0.3951	0.49025
evm.model.scaffold_375.413	0.4805	0.47295
evm.model.scaffold_375.513	0.3682	0.4602
evm.model.scaffold_375.386	0.4869	0.4373
evm.model.scaffold_375.746	0.4973	0.48915
evm.model.scaffold_375.553	0.6494	0.49135
evm.model.scaffold_375.103	0.4004	0.4614
evm.model.scaffold_375.525	0.4104	0.50395
evm.model.scaffold_375.164	0.3411	0.4552
evm.model.scaffold_375.733	0.5451	0.44615
evm.model.scaffold_375.409	0.3555	0.4352
evm.model.scaffold_375.430	0.6533	0.47215
evm.model.scaffold_375.540	0.4702	0.5298
evm.model.scaffold_375.568	0.504	0.4484
evm.model.scaffold_375.552	0.4	0.49545
evm.model.scaffold_375.299	0.3304	0.5104
evm.model.scaffold_375.130	0.5377	0.5189
evm.model.scaffold_375.339	0.4057	0.45285
evm.model.scaffold_375.611	0.5802	0.44785
evm.model.scaffold_375.346	0.4621	0.43935
evm.model.scaffold_375.357	0.2929	0.4429
evm.model.scaffold_375.82	0.461	0.42855
evm.model.scaffold_375.461.1	0.3893	0.4273
evm.model.scaffold_375.721	0.3928	0.4638
evm.model.scaffold_375.438	0.3017	0.4483
evm.model.scaffold_375.387.1	0.4395	0.44905
evm.model.scaffold_375.547_evm.model.scaffold_375.548	0.4578	0.41255
evm.model.scaffold_375.428	0.496	0.45915
evm.model.scaffold_375.636	0.4329	0.4004
evm.model.scaffold_375.10	0.3411	0.44965
evm.model.scaffold_375.257	0.456	0.5078
evm.model.scaffold_375.120	0.4378	0.49875
evm.model.scaffold_375.253	0.4755	0.4717
evm.model.scaffold_375.12	0.381	0.4796
evm.model.scaffold_375.73	0.4828	0.47415
evm.model.scaffold_375.551	0.4062	0.4805
evm.model.scaffold_375.307	0.7286	0.53575
evm.model.scaffold_375.673	0.4298	0.4449
evm.model.scaffold_375.297	0.4048	0.45105
evm.model.scaffold_375.655	0.3623	0.4404
evm.model.scaffold_375.165	0.389	0.4494
evm.model.scaffold_375.219	0.3906	0.43215
evm.model.scaffold_375.85	0.6667	0.53705
evm.model.scaffold_375.665	0.3598	0.48895
evm.model.scaffold_375.201	0.5618	0.43815
evm.model.scaffold_375.312	0.4059	0.4265
evm.model.scaffold_375.142	0.4006	0.45455
evm.model.scaffold_375.406	0.3629	0.4595
evm.model.scaffold_375.579	0.4135	0.43165
evm.model.scaffold_375.268	0.4612	0.7055
evm.model.scaffold_375.539	0.3947	0.42895
evm.model.scaffold_375.310	0.3764	0.44675
evm.model.scaffold_375.572	0.4103	0.35895
evm.model.scaffold_375.55	0.4282	0.4489
evm.model.scaffold_375.220	0.4025	0.4528
evm.model.scaffold_375.126	0.2571	0.48095
evm.model.scaffold_375.34	0.3471	0.529
evm.model.scaffold_375.693	0.4028	0.4886
evm.model.scaffold_375.272	0.4276	0.4441
evm.model.scaffold_375.449	0.6318	0.4751
evm.model.scaffold_375.738	0.496	0.4583
evm.model.scaffold_375.588	0.7215	0.54565
evm.model.scaffold_375.717	0.4908	0.46935
evm.model.scaffold_375.50	0.3451	0.47615
evm.model.scaffold_375.184	0.5041	0.42275
evm.model.scaffold_375.724	0.4276	0.4251
evm.model.scaffold_375.466	0.4288	0.45275
evm.model.scaffold_375.258	0.4683	0.46375
evm.model.scaffold_375.236	0.3681	0.4809
evm.model.scaffold_375.578	0.4974	0.5641
evm.model.scaffold_375.726	0.5559	0.4455
evm.model.scaffold_375.586	0.4075	0.4921
evm.model.scaffold_375.497	0.3679	0.4754
evm.model.scaffold_375.439	0.4368	0.4842
evm.model.scaffold_375.456	0.3802	0.4355
evm.model.scaffold_375.190	0.4789	0.4789
evm.model.scaffold_375.157	0.4309	0.39025
evm.model.scaffold_375.27	0.395	0.4895
evm.model.scaffold_375.68	0.4847	0.43115
evm.model.scaffold_375.14	0.473	0.5338
evm.model.scaffold_375.379	0.4626	0.4742
evm.model.scaffold_375.445	0.3882	0.4353
evm.model.scaffold_375.154	0.4293	0.4293
evm.model.scaffold_375.354	0.4537	0.43475
evm.model.scaffold_375.452	0.4897	0.43825
evm.model.scaffold_375.459	0.4463	0.51655
evm.model.scaffold_375.294	0.4392	0.46445
evm.model.scaffold_375.54	0.433	0.45335
evm.model.scaffold_375.329.1	0.4652	0.41615
evm.model.scaffold_375.412_evm.model.scaffold_375.414	0.4734	0.4867
evm.model.scaffold_375.549	0.4254	0.4637
evm.model.scaffold_375.25	0.4109	0.47385
evm.model.scaffold_375.213	0.3764	0.5316
evm.model.scaffold_375.431	0.4	0.475
evm.model.scaffold_375.66	0.547	0.41905
evm.model.scaffold_375.587	0.3822	0.45395
evm.model.scaffold_375.663	0.5495	0.47295
evm.model.scaffold_375.732	0.3686	0.47045
evm.model.scaffold_375.658	0.3761	0.4598
evm.model.scaffold_375.223	0.5273	0.4608
evm.model.scaffold_375.612	0.609	0.52255
evm.model.scaffold_375.1	0.7531	0.5212
evm.model.scaffold_375.713	0.4249	0.46805
evm.model.scaffold_375.267	0.5264	0.5116
evm.model.scaffold_375.546	0.4961	0.49215
evm.model.scaffold_375.475	0.7103	0.4504
evm.model.scaffold_375.762	0.4295	0.43695
evm.model.scaffold_375.286	0.5127	0.52035
evm.model.scaffold_375.662	0.3938	0.4654
evm.model.scaffold_375.683	0.529	0.4632
evm.model.scaffold_375.698	0.4018	0.46875
evm.model.scaffold_375.377	0.4528	0.4654
evm.model.scaffold_375.434	0.3689	0.44235
evm.model.scaffold_375.74.1	0.383	0.4783
evm.model.scaffold_375.104	0.4205	0.4162
evm.model.scaffold_375.78	0.297	0.3861
evm.model.scaffold_375.22	0.4597	0.48445
evm.model.scaffold_375.647	0.4308	0.39615
evm.model.scaffold_375.532	0.3562	0.46575
evm.model.scaffold_375.226	0.3681	0.42355
evm.model.scaffold_375.246	0.4823	0.4425
evm.model.scaffold_375.566	0.3492	0.4579
evm.model.scaffold_375.482	0.4816	0.477
evm.model.scaffold_375.141	0.3905	0.45525
evm.model.scaffold_375.397	0.4266	0.4792
evm.model.scaffold_375.151	0.4952	0.47145
evm.model.scaffold_375.450	0.5676	0.48875
evm.model.scaffold_375.505	0.4497	0.49405
evm.model.scaffold_375.615	0.6431	0.5303
evm.model.scaffold_375.761	0.606	0.5231
evm.model.scaffold_375.37	0.4255	0.4774
evm.model.scaffold_375.59	0.4153	0.44825
evm.model.scaffold_375.106	0.4013	0.42355
evm.model.scaffold_375.492	0.4769	0.44485
evm.model.scaffold_375.451	0.4169	0.44865
evm.model.scaffold_375.519	0.493	0.45305
evm.model.scaffold_375.753	0.3782	0.42845
evm.model.scaffold_375.426	0.3822	0.48945
evm.model.scaffold_375.362	0.3105	0.4342
evm.model.scaffold_375.231	0.4277	0.41615
evm.model.scaffold_375.75	0.4855	0.46365
evm.model.scaffold_375.308	0.3524	0.44285
evm.model.scaffold_375.730	0.3689	0.4272
evm.model.scaffold_375.613	0.7233	0.55825
evm.model.scaffold_375.680	0.3245	0.55125
evm.model.scaffold_375.159	0.4966	0.43795
evm.model.scaffold_375.707	0.5435	0.55435
evm.model.scaffold_375.180	0.4061	0.4697
evm.model.scaffold_375.514	0.4227	0.4572
evm.model.scaffold_375.416	0.4527	0.4223
evm.model.scaffold_375.531.1	0.4742	0.48195
evm.model.scaffold_375.322	0.5521	0.49445
evm.model.scaffold_375.43	0.4238	0.47155
evm.model.scaffold_375.437	0.3481	0.47535
evm.model.scaffold_375.561	0.6648	0.50135
evm.model.scaffold_375.690	0.4067	0.41865
evm.model.scaffold_375.522	0.3412	0.44365
evm.model.scaffold_375.137	0.4969	0.454
evm.model.scaffold_375.152	0.4383	0.4358
evm.model.scaffold_375.48	0.4629	0.4308
evm.model.scaffold_375.63	0.3697	0.44425
evm.model.scaffold_375.264	0.5915	0.4554
evm.model.scaffold_375.659	0.4318	0.4419
evm.model.scaffold_375.756	0.4681	0.4657
evm.model.scaffold_375.654	0.6479	0.47535
evm.model.scaffold_375.441	0.644	0.44
evm.model.scaffold_375.464	0.4456	0.4378
evm.model.scaffold_375.33.1	0.4472	0.4189
evm.model.scaffold_375.778	0.4602	0.49115
evm.model.scaffold_375.526	0.4358	0.4836
evm.model.scaffold_375.18	0.3664	0.3855
evm.model.scaffold_375.669	0.4939	0.4238
evm.model.scaffold_375.305	0.526	0.52275
evm.model.scaffold_375.91	0.4469	0.4553
evm.model.scaffold_375.89	0.3732	0.45435
evm.model.scaffold_375.598	0.394	0.46855
evm.model.scaffold_375.593	0.3514	0.54185
evm.model.scaffold_375.408	0.4436	0.4662
evm.model.scaffold_375.62	0.3551	0.4765
evm.model.scaffold_375.256	0.5882	0.63725
evm.model.scaffold_375.446	0.6148	0.56965
evm.model.scaffold_375.203	0.4731	0.4672
evm.model.scaffold_375.577	0.3858	0.45375
evm.model.scaffold_375.494	0.3889	0.4551
evm.model.scaffold_375.500	0.4715	0.49205
evm.model.scaffold_375.685	0.5689	0.43415
evm.model.scaffold_375.622	0.5459	0.47965
evm.model.scaffold_375.81	0.4406	0.47205
evm.model.scaffold_375.199	0.7016	0.39515
evm.model.scaffold_375.259_evm.model.scaffold_375.260	0.3117	0.464
evm.model.scaffold_375.324	0.4525	0.4525
evm.model.scaffold_375.614	0.3293	0.494
evm.model.scaffold_375.727	0.5742	0.4336
evm.model.scaffold_375.554	0.4419	0.4942
evm.model.scaffold_375.178	0.3562	0.42275
evm.model.scaffold_375.368	0.5333	0.4457
evm.model.scaffold_375.576	0.3554	0.46075
evm.model.scaffold_375.627	0.3956	0.40845
evm.model.scaffold_375.700	0.4693	0.49355
evm.model.scaffold_375.302	0.337	0.4475
evm.model.scaffold_375.569	0.4113	0.461
evm.model.scaffold_375.661	0.4167	0.4422
evm.model.scaffold_375.36	0.4587	0.47705
evm.model.scaffold_375.133	0.3667	0.3875
evm.model.scaffold_375.110	0.4047	0.42085
evm.model.scaffold_375.35	0.375	0.4967
evm.model.scaffold_375.52	0.459	0.44595
evm.model.scaffold_375.617	0.5575	0.50885
evm.model.scaffold_375.610	0.4906	0.445
evm.model.scaffold_375.743	0.4222	0.46495
evm.model.scaffold_375.677	0.3726	0.44905
evm.model.scaffold_375.57	0.435	0.484
evm.model.scaffold_375.306	0.3856	0.4783
evm.model.scaffold_375.640	0.4356	0.42655
evm.model.scaffold_375.254	0.63	0.48955
evm.model.scaffold_375.596	0.4501	0.4416
evm.model.scaffold_375.574	0.431	0.46095
evm.model.scaffold_375.230	0.4239	0.4993
evm.model.scaffold_375.242	0.3754	0.4454
evm.model.scaffold_375.353	0.4585	0.4496
evm.model.scaffold_375.701	0.3789	0.44515
evm.model.scaffold_375.605	0.4545	0.4606
evm.model.scaffold_375.418	0.3155	0.4101
evm.model.scaffold_375.345	0.28	0.3967
evm.model.scaffold_375.589	0.448	0.57465
evm.model.scaffold_375.429	0.4512	0.43085
evm.model.scaffold_375.71	0.4844	0.4883
evm.model.scaffold_375.682	0.4083	0.5121
evm.model.scaffold_375.678	0.4	0.4169
evm.model.scaffold_375.584	0.4644	0.48155
evm.model.scaffold_375.750	0.4065	0.4375
evm.model.scaffold_375.757	0.325	0.5054
evm.model.scaffold_375.635	0.4145	0.4441
evm.model.scaffold_375.238	0.4269	0.43135
evm.model.scaffold_375.729.2	0.44	0.43165
evm.model.scaffold_375.321	0.4905	0.4789
evm.model.scaffold_375.378	0.4909	0.48635
evm.model.scaffold_375.275	0.3862	0.4709
evm.model.scaffold_375.537	0.689	0.47795
evm.model.scaffold_375.112	0.3766	0.4578
evm.model.scaffold_375.543	0.2734	0.39925
evm.model.scaffold_375.271	0.467	0.4802
evm.model.scaffold_375.80	0.5323	0.42745
evm.model.scaffold_375.167	0.3733	0.46545
evm.model.scaffold_375.498	0.3985	0.4022
evm.model.scaffold_375.421	0.4109	0.43595
evm.model.scaffold_375.227	0.3862	0.488
evm.model.scaffold_375.674.1	0.3818	0.4347
evm.model.scaffold_375.742	0.3944	0.42025
evm.model.scaffold_375.736	0.4097	0.45325
evm.model.scaffold_375.136	0.5665	0.42195
evm.model.scaffold_375.235	0.3536	0.5304
evm.model.scaffold_375.109	0.4512	0.49535
evm.model.scaffold_375.373	0.3852	0.4282
evm.model.scaffold_375.161	0.5817	0.44485
evm.model.scaffold_375.194	0.3361	0.48755
evm.model.scaffold_375.350	0.2611	0.4083
evm.model.scaffold_375.411	0.4697	0.4894
evm.model.scaffold_375.140	0.6227	0.4578
evm.model.scaffold_375.328	0.3611	0.44195
evm.model.scaffold_375.723	0.3642	0.4584
evm.model.scaffold_375.383	0.7566	0.4646
evm.model.scaffold_375.218	0.3123	0.4868
evm.model.scaffold_375.281	0.4878	0.53115
evm.model.scaffold_375.175	0.409	0.4439
evm.model.scaffold_375.163	0.4239	0.4599
evm.model.scaffold_375.641	0.4275	0.4405
evm.model.scaffold_375.454	0.3813	0.44245
evm.model.scaffold_375.541	0.507	0.5028
evm.model.scaffold_375.405	0.4781	0.47085
evm.model.scaffold_375.204	0.4306	0.45
evm.model.scaffold_375.481	0.3864	0.48215
[truncated: 25,941 more rows]

## Sheet: Chloroplast genome
gene	GC3	GC12
NC_036961.1_cds_YP_009460147.1_1	0.3361	0.5126
NC_036961.1_cds_YP_009460148.1_2	0.3164	0.4647
NC_036961.1_cds_YP_009460149.1_3	0.2868	0.3275
NC_036961.1_cds_YP_009460150.1_4	0.2983	0.50315
NC_036961.1_cds_YP_009460151.1_5	0.2846	0.48895
NC_036961.1_cds_YP_009460152.1_6	0.2761	0.43285
NC_036961.1_cds_YP_009460153.1_7	0.2479	0.39665
NC_036961.1_cds_YP_009460154.1_8	0.2757	0.4509
NC_036961.1_cds_YP_009460155.1_9	0.2704	0.434
NC_036961.1_cds_YP_009460156.1_10	0.2475	0.43565
NC_036961.1_cds_YP_009460157.1_11	0.2959	0.43195
NC_036961.1_cds_YP_009460158.1_12	0.3249	0.4747
NC_036961.1_cds_YP_009460159.1_13	0.3034	0.4585
NC_036961.1_cds_YP_009460160.1_14	0.2475	0.4554
NC_036961.1_cds_YP_009460162.1_16	0.3228	0.4958
NC_036961.1_cds_YP_009460163.1_17	0.3164	0.476
NC_036961.1_cds_YP_009460166.1_20	0.2885	0.43465
NC_036961.1_cds_YP_009460167.1_21	0.2511	0.4319
NC_036961.1_cds_YP_009460168.1_22	0.2616	0.38295
NC_036961.1_cds_YP_009460169.1_23	0.2785	0.4072
NC_036961.1_cds_YP_009460170.1_24	0.25	0.4153
NC_036961.1_cds_YP_009460172.1_26	0.3069	0.3915
NC_036961.1_cds_YP_009460173.1_27	0.2798	0.4736
NC_036961.1_cds_YP_009460176.1_30	0.2908	0.3685
NC_036961.1_cds_YP_009460178.1_32	0.3281	0.40625
NC_036961.1_cds_YP_009460179.1_33	0.3174	0.3348
NC_036961.1_cds_YP_009460180.1_34	0.2991	0.45015
NC_036961.1_cds_YP_009460189.1_43	0.25	0.3846
NC_036961.1_cds_YP_009460190.1_44	0.25	0.3625
NC_036961.1_cds_YP_009460191.1_45	0.3361	0.5126
NC_036961.1_cds_YP_009460192.1_46	0.301	0.477
NC_036961.1_cds_YP_009460193.1_47	0.3045	0.50885
NC_036961.1_cds_YP_009460197.1_51	0.3009	0.44215
NC_036961.1_cds_YP_009460198.1_52	0.2112	0.4472
NC_036961.1_cds_YP_009460199.1_53	0.25	0.3705
NC_036961.1_cds_YP_009460200.1_54	0.2446	0.536
NC_036961.1_cds_YP_009460202.1_56	0.2667	0.3926
NC_036961.1_cds_YP_009460203.1_57	0.2846	0.43905
NC_036961.1_cds_YP_009460204.1_58	0.292	0.50365
NC_036961.1_cds_YP_009460205.1_59	0.21	0.38355
NC_036961.1_cds_YP_009460207.1_61	0.3139	0.49635
NC_036961.1_cds_YP_009460209.1_63	0.3646	0.3799
NC_036961.1_cds_YP_009460210.1_64	0.3185	0.4067
NC_036961.1_cds_YP_009460211.1_65	0.2372	0.48715
NC_036961.1_cds_YP_009460212.1_66	0.4805	0.48375
NC_036961.1_cds_YP_009460214.1_68	0.2354	0.34525
NC_036961.1_cds_YP_009460216.1_70	0.2593	0.3318
NC_036961.1_cds_YP_009460217.1_71	0.304	0.379
NC_036961.1_cds_YP_009460219.1_73	0.2647	0.36275
NC_036961.1_cds_YP_009460220.1_74	0.2316	0.4011
NC_036961.1_cds_YP_009460221.1_75	0.2349	0.38855
NC_036961.1_cds_YP_009460222.1_76	0.2115	0.39145
NC_036961.1_cds_YP_009460223.1_77	0.2563	0.434
NC_036961.1_cds_YP_009460225.1_79	0.2503	0.3083
NC_036961.1_cds_YP_009460227.1_81	0.4805	0.48375
NC_036961.1_cds_YP_009460228.1_82	0.2372	0.48715
NC_036961.1_cds_YP_009460229.1_83	0.3185	0.4067
NC_036961.1_cds_YP_009460230.1_84	0.3646	0.3799
NC_036961.1_cds_YP_009460232.1_86	0.315	0.49635
NC_044117.1_cds_YP_009680943.1_1	0.3361	0.5126
NC_044117.1_cds_YP_009680944.1_2	0.3107	0.4633
NC_044117.1_cds_YP_009680945.1_3	0.2829	0.32945
NC_044117.1_cds_YP_009680946.1_4	0.3004	0.50525
NC_044117.1_cds_YP_009680947.1_5	0.2846	0.48895
NC_044117.1_cds_YP_009680948.1_6	0.2836	0.4403
NC_044117.1_cds_YP_009680949.1_7	0.2479	0.39255
NC_044117.1_cds_YP_009680950.1_8	0.2757	0.4486
NC_044117.1_cds_YP_009680951.1_9	0.283	0.434
NC_044117.1_cds_YP_009680952.1_10	0.2475	0.43565
NC_044117.1_cds_YP_009680953.1_11	0.2899	0.43195
NC_044117.1_cds_YP_009680954.1_12	0.3262	0.4754
NC_044117.1_cds_YP_009680955.1_13	0.3048	0.4599
NC_044117.1_cds_YP_009680956.1_14	0.2574	0.45045
NC_044117.1_cds_YP_009680958.1_16	0.3122	0.49685
NC_044117.1_cds_YP_009680959.1_17	0.3136	0.476
NC_044117.1_cds_YP_009680962.1_20	0.2885	0.43465
NC_044117.1_cds_YP_009680963.1_21	0.2481	0.4304
NC_044117.1_cds_YP_009680964.1_22	0.2624	0.3832
NC_044117.1_cds_YP_009680965.1_23	0.2743	0.4072
NC_044117.1_cds_YP_009680966.1_24	0.25	0.41735
NC_044117.1_cds_YP_009680968.1_26	0.3069	0.3968
NC_044117.1_cds_YP_009680969.1_27	0.2798	0.4736
NC_044117.1_cds_YP_009680972.1_30	0.2908	0.3685
NC_044117.1_cds_YP_009680974.1_32	0.3281	0.40885
NC_044117.1_cds_YP_009680975.1_33	0.3174	0.33915
NC_044117.1_cds_YP_009680976.1_34	0.3022	0.45015
NC_044117.1_cds_YP_009680985.1_43	0.25	0.3846
NC_044117.1_cds_YP_009680986.1_44	0.25	0.36665
NC_044117.1_cds_YP_009680987.1_45	0.3361	0.5126
NC_044117.1_cds_YP_009680988.1_46	0.2959	0.477
NC_044117.1_cds_YP_009680989.1_47	0.3026	0.50885
NC_044117.1_cds_YP_009680993.1_51	0.3009	0.44215
NC_044117.1_cds_YP_009680994.1_52	0.2174	0.4441
NC_044117.1_cds_YP_009680995.1_53	0.253	0.372
NC_044117.1_cds_YP_009680996.1_54	0.2374	0.536
NC_044117.1_cds_YP_009680998.1_56	0.2667	0.3926
NC_044117.1_cds_YP_009680999.1_57	0.2764	0.43905
NC_044117.1_cds_YP_009681000.1_58	0.2868	0.51105
NC_044117.1_cds_YP_009681001.1_59	0.2055	0.38355
NC_044117.1_cds_YP_009681003.1_61	0.3152	0.4982
NC_044117.1_cds_YP_009681005.1_63	0.364	0.3791
NC_044117.1_cds_YP_009681006.1_64	0.3185	0.4067
NC_044117.1_cds_YP_009681007.1_65	0.2372	0.48715
NC_044117.1_cds_YP_009681009.1_67	0.3526	0.34295
NC_044117.1_cds_YP_009681010.1_68	0.2284	0.3499
NC_044117.1_cds_YP_009681012.1_70	0.2654	0.3349
NC_044117.1_cds_YP_009681013.1_71	0.306	0.379
NC_044117.1_cds_YP_009681015.1_73	0.2549	0.36275
NC_044117.1_cds_YP_009681016.1_74	0.226	0.4011
NC_044117.1_cds_YP_009681017.1_75	0.2169	0.39155
NC_044117.1_cds_YP_009681018.1_76	0.2143	0.39285
NC_044117.1_cds_YP_009681019.1_77	0.2513	0.434
NC_044117.1_cds_YP_009681021.1_79	0.2528	0.30655
NC_044117.1_cds_YP_009681023.1_81	0.2372	0.48715
NC_044117.1_cds_YP_009681024.1_82	0.3185	0.4067
NC_044117.1_cds_YP_009681025.1_83	0.364	0.3791
NC_044117.1_cds_YP_009681027.1_85	0.3152	0.4982
NC_049007.1_cds_YP_009863380.1_1	0.3226	0.50405
NC_049007.1_cds_YP_009863381.1_2	0.3192	0.4647
NC_049007.1_cds_YP_009863382.1_3	0.2868	0.3275
NC_049007.1_cds_YP_009863383.1_4	0.2962	0.50315
NC_049007.1_cds_YP_009863384.1_5	0.2846	0.48795
NC_049007.1_cds_YP_009863385.1_6	0.2761	0.43285
NC_049007.1_cds_YP_009863386.1_7	0.2479	0.39665
NC_049007.1_cds_YP_009863387.1_8	0.2757	0.4509
NC_049007.1_cds_YP_009863388.1_9	0.2704	0.434
NC_049007.1_cds_YP_009863389.1_10	0.2475	0.43565
NC_049007.1_cds_YP_009863390.1_11	0.2959	0.43195
NC_049007.1_cds_YP_009863391.1_12	0.3262	0.4747
NC_049007.1_cds_YP_009863392.1_13	0.3034	0.4585
NC_049007.1_cds_YP_009863393.1_14	0.2475	0.4554
NC_049007.1_cds_YP_009863395.1_16	0.3228	0.49685
NC_049007.1_cds_YP_009863396.1_17	0.3164	0.476
NC_049007.1_cds_YP_009863399.1_20	0.2885	0.43465
NC_049007.1_cds_YP_009863400.1_21	0.2518	0.43265
NC_049007.1_cds_YP_009863401.1_22	0.2614	0.383
NC_049007.1_cds_YP_009863402.1_23	0.2785	0.4072
NC_049007.1_cds_YP_009863403.1_24	0.25	0.41735
NC_049007.1_cds_YP_009863405.1_26	0.3069	0.38885
NC_049007.1_cds_YP_009863406.1_27	0.2798	0.4736
NC_049007.1_cds_YP_009863410.1_31	0.2888	0.3685
NC_049007.1_cds_YP_009863412.1_33	0.3281	0.40625
NC_049007.1_cds_YP_009863413.1_34	0.3174	0.33695
NC_049007.1_cds_YP_009863414.1_35	0.296	0.45015
NC_049007.1_cds_YP_009863423.1_44	0.25	0.3846
NC_049007.1_cds_YP_009863424.1_45	0.25	0.3625
NC_049007.1_cds_YP_009863425.1_46	0.3226	0.50405
NC_049007.1_cds_YP_009863426.1_47	0.3046	0.47465
NC_049007.1_cds_YP_009863427.1_48	0.3045	0.50885
NC_049007.1_cds_YP_009863431.1_52	0.3009	0.44215
NC_049007.1_cds_YP_009863432.1_53	0.2112	0.4472
NC_049007.1_cds_YP_009863433.1_54	0.25	0.3705
NC_049007.1_cds_YP_009863434.1_55	0.2446	0.536
NC_049007.1_cds_YP_009863436.1_57	0.2667	0.3926
NC_049007.1_cds_YP_009863437.1_58	0.2846	0.43905
NC_049007.1_cds_YP_009863438.1_59	0.2993	0.51095
NC_049007.1_cds_YP_009863439.1_60	0.21	0.38355
NC_049007.1_cds_YP_009863441.1_62	0.3114	0.49635
NC_049007.1_cds_YP_009863443.1_64	0.3646	0.3799
NC_049007.1_cds_YP_009863444.1_65	0.3185	0.4067
NC_049007.1_cds_YP_009863445.1_66	0.2372	0.48715
NC_049007.1_cds_YP_009863446.1_67	0.236	0.34665
NC_049007.1_cds_YP_009863448.1_69	0.2593	0.3318
NC_049007.1_cds_YP_009863449.1_70	0.302	0.379
NC_049007.1_cds_YP_009863451.1_72	0.2647	0.36275
NC_049007.1_cds_YP_009863452.1_73	0.2316	0.4011
NC_049007.1_cds_YP_009863453.1_74	0.2349	0.38855
NC_049007.1_cds_YP_009863454.1_75	0.2088	0.39285
NC_049007.1_cds_YP_009863455.1_76	0.2563	0.434
NC_049007.1_cds_YP_009863457.1_78	0.2514	0.30855
NC_049007.1_cds_YP_009863458.1_79	0.2372	0.48715
NC_049007.1_cds_YP_009863459.1_80	0.3185	0.4067
NC_049007.1_cds_YP_009863460.1_81	0.3646	0.3799
NC_049007.1_cds_YP_009863462.1_83	0.3114	0.49635
NC_049008.1_cds_YP_009863463.1_1	0.3226	0.50405
NC_049008.1_cds_YP_009863464.1_2	0.3164	0.4647
NC_049008.1_cds_YP_009863465.1_3	0.2868	0.3275
NC_049008.1_cds_YP_009863466.1_4	0.2983	0.50315
NC_049008.1_cds_YP_009863467.1_5	0.2846	0.48895
NC_049008.1_cds_YP_009863468.1_6	0.2761	0.43285
NC_049008.1_cds_YP_009863469.1_7	0.2479	0.39665
NC_049008.1_cds_YP_009863470.1_8	0.2757	0.4509
NC_049008.1_cds_YP_009863471.1_9	0.2704	0.434
NC_049008.1_cds_YP_009863472.1_10	0.2475	0.43565
NC_049008.1_cds_YP_009863473.1_11	0.3018	0.43195
NC_049008.1_cds_YP_009863474.1_12	0.3249	0.4747
NC_049008.1_cds_YP_009863475.1_13	0.3034	0.4585
NC_049008.1_cds_YP_009863476.1_14	0.2475	0.4554
NC_049008.1_cds_YP_009863478.1_16	0.3228	0.4958
NC_049008.1_cds_YP_009863479.1_17	0.3164	0.476
NC_049008.1_cds_YP_009863482.1_20	0.2885	0.43465
NC_049008.1_cds_YP_009863483.1_21	0.2518	0.4319
NC_049008.1_cds_YP_009863484.1_22	0.2616	0.38295
NC_049008.1_cds_YP_009863485.1_23	0.2785	0.4072
NC_049008.1_cds_YP_009863486.1_24	0.25	0.4153
NC_049008.1_cds_YP_009863488.1_26	0.3069	0.3915
NC_049008.1_cds_YP_009863489.1_27	0.2798	0.4736
NC_049008.1_cds_YP_009863493.1_31	0.2908	0.3685
NC_049008.1_cds_YP_009863495.1_33	0.3281	0.40625
NC_049008.1_cds_YP_009863496.1_34	0.3174	0.3348
NC_049008.1_cds_YP_009863497.1_35	0.2991	0.45015
NC_049008.1_cds_YP_009863506.1_44	0.25	0.3846
NC_049008.1_cds_YP_009863507.1_45	0.25	0.3625
NC_049008.1_cds_YP_009863508.1_46	0.3226	0.50405
NC_049008.1_cds_YP_009863509.1_47	0.3046	0.47465
NC_049008.1_cds_YP_009863510.1_48	0.3045	0.50885
NC_049008.1_cds_YP_009863514.1_52	0.3009	0.44215
NC_049008.1_cds_YP_009863515.1_53	0.2112	0.4472
NC_049008.1_cds_YP_009863516.1_54	0.25	0.3705
NC_049008.1_cds_YP_009863517.1_55	0.2446	0.536
NC_049008.1_cds_YP_009863519.1_57	0.2667	0.3926
NC_049008.1_cds_YP_009863520.1_58	0.2846	0.43905
NC_049008.1_cds_YP_009863521.1_59	0.2993	0.51095
NC_049008.1_cds_YP_009863522.1_60	0.21	0.38355
NC_049008.1_cds_YP_009863524.1_62	0.315	0.49635
NC_049008.1_cds_YP_009863526.1_64	0.3646	0.3799
NC_049008.1_cds_YP_009863527.1_65	0.3185	0.4067
NC_049008.1_cds_YP_009863528.1_66	0.2372	0.48715
NC_049008.1_cds_YP_009863529.1_67	0.2354	0.34525
NC_049008.1_cds_YP_009863531.1_69	0.2593	0.3318
NC_049008.1_cds_YP_009863532.1_70	0.304	0.379
NC_049008.1_cds_YP_009863534.1_72	0.2647	0.36275
NC_049008.1_cds_YP_009863535.1_73	0.2316	0.4011
NC_049008.1_cds_YP_009863536.1_74	0.2349	0.38855
NC_049008.1_cds_YP_009863537.1_75	0.2115	0.39145
NC_049008.1_cds_YP_009863538.1_76	0.2563	0.434
NC_049008.1_cds_YP_009863540.1_78	0.2503	0.3083
NC_049008.1_cds_YP_009863541.1_79	0.2372	0.48715
NC_049008.1_cds_YP_009863542.1_80	0.3185	0.4067
NC_049008.1_cds_YP_009863543.1_81	0.3646	0.3799
NC_049008.1_cds_YP_009863545.1_83	0.3125	0.4945
NC_049009.1_cds_YP_009863546.1_1	0.3333	0.50795
NC_049009.1_cds_YP_009863547.1_2	0.3192	0.4647
NC_049009.1_cds_YP_009863548.1_3	0.287	0.32715
NC_049009.1_cds_YP_009863549.1_4	0.2983	0.5042
NC_049009.1_cds_YP_009863550.1_5	0.2846	0.48895
NC_049009.1_cds_YP_009863551.1_6	0.2761	0.43285
NC_049009.1_cds_YP_009863552.1_7	0.2479	0.39665
NC_049009.1_cds_YP_009863553.1_8	0.271	0.4509
NC_049009.1_cds_YP_009863554.1_9	0.2704	0.434
NC_049009.1_cds_YP_009863555.1_10	0.2475	0.43565
NC_049009.1_cds_YP_009863556.1_11	0.3018	0.43195
NC_049009.1_cds_YP_009863557.1_12	0.3249	0.4754
NC_049009.1_cds_YP_009863558.1_13	0.3034	0.4585
NC_049009.1_cds_YP_009863559.1_14	0.2475	0.4554
NC_049009.1_cds_YP_009863561.1_16	0.3228	0.4958
NC_049009.1_cds_YP_009863562.1_17	0.3164	0.476
NC_049009.1_cds_YP_009863565.1_20	0.2885	0.43415
NC_049009.1_cds_YP_009863566.1_21	0.2518	0.4319
NC_049009.1_cds_YP_009863567.1_22	0.2616	0.38335
NC_049009.1_cds_YP_009863568.1_23	0.2785	0.4051
NC_049009.1_cds_YP_009863569.1_24	0.25	0.41735
NC_049009.1_cds_YP_009863571.1_26	0.3152	0.3886
NC_049009.1_cds_YP_009863572.1_27	0.2798	0.4736
NC_049009.1_cds_YP_009863576.1_31	0.2908	0.3685
NC_049009.1_cds_YP_009863578.1_33	0.3229	0.40625
NC_049009.1_cds_YP_009863579.1_34	0.3174	0.33695
NC_049009.1_cds_YP_009863580.1_35	0.2991	0.45015
NC_049009.1_cds_YP_009863589.1_44	0.25	0.3846
NC_049009.1_cds_YP_009863590.1_45	0.25	0.35835
NC_049009.1_cds_YP_009863591.1_46	0.3226	0.50405
NC_049009.1_cds_YP_009863592.1_47	0.3046	0.47465
NC_049009.1_cds_YP_009863593.1_48	0.3045	0.50885
NC_049009.1_cds_YP_009863597.1_52	0.2963	0.44215
NC_049009.1_cds_YP_009863598.1_53	0.2112	0.4472
NC_049009.1_cds_YP_009863599.1_54	0.2523	0.37085
NC_049009.1_cds_YP_009863600.1_55	0.2446	0.5396
NC_049009.1_cds_YP_009863602.1_57	0.2667	0.3926
NC_049009.1_cds_YP_009863603.1_58	0.2846	0.435
NC_049009.1_cds_YP_009863604.1_59	0.2941	0.5147
NC_049009.1_cds_YP_009863605.1_60	0.21	0.38355
NC_049009.1_cds_YP_009863607.1_62	0.315	0.49635
NC_049009.1_cds_YP_009863609.1_64	0.3646	0.37965
NC_049009.1_cds_YP_009863610.1_65	0.3185	0.4067
NC_049009.1_cds_YP_009863611.1_66	0.2372	0.48715
NC_049009.1_cds_YP_009863612.1_67	0.236	0.3473
NC_049009.1_cds_YP_009863614.1_69	0.2623	0.3318
NC_049009.1_cds_YP_009863615.1_70	0.302	0.378
NC_049009.1_cds_YP_009863617.1_72	0.2647	0.36275
NC_049009.1_cds_YP_009863618.1_73	0.2316	0.4011
NC_049009.1_cds_YP_009863619.1_74	0.2349	0.38855
NC_049009.1_cds_YP_009863620.1_75	0.2088	0.3942
NC_049009.1_cds_YP_009863621.1_76	0.2563	0.43275
NC_049009.1_cds_YP_009863623.1_78	0.25	0.3066
NC_049009.1_cds_YP_009863624.1_79	0.2372	0.48715
NC_049009.1_cds_YP_009863625.1_80	0.3185	0.4067
NC_049009.1_cds_YP_009863626.1_81	0.3646	0.37965
NC_049009.1_cds_YP_009863628.1_83	0.315	0.49635
NC_049043.1_cds_YP_009865434.1_1	0.3226	0.50405
NC_049043.1_cds_YP_009865435.1_2	0.3192	0.4647
NC_049043.1_cds_YP_009865436.1_3	0.2849	0.33135
NC_049043.1_cds_YP_009865437.1_4	0.2983	0.5042
NC_049043.1_cds_YP_009865438.1_5	0.2846	0.48995
NC_049043.1_cds_YP_009865439.1_6	0.2761	0.4291
NC_049043.1_cds_YP_009865440.1_7	0.2479	0.39665
NC_049043.1_cds_YP_009865441.1_8	0.2804	0.4486
NC_049043.1_cds_YP_009865442.1_9	0.2642	0.434
NC_049043.1_cds_YP_009865443.1_10	0.2475	0.43565
NC_049043.1_cds_YP_009865444.1_11	0.3	0.4324
NC_049043.1_cds_YP_009865445.1_12	0.3262	0.47605
NC_049043.1_cds_YP_009865446.1_13	0.3007	0.4592
NC_049043.1_cds_YP_009865447.1_14	0.2574	0.45045
NC_049043.1_cds_YP_009865449.1_16	0.3207	0.49685
NC_049043.1_cds_YP_009865450.1_17	0.3136	0.476
NC_049043.1_cds_YP_009865453.1_20	0.2885	0.43415
NC_049043.1_cds_YP_009865454.1_21	0.2515	0.432
NC_049043.1_cds_YP_009865455.1_22	0.2594	0.38225
NC_049043.1_cds_YP_009865456.1_23	0.2785	0.4072
NC_049043.1_cds_YP_009865457.1_24	0.246	0.4153
NC_049043.1_cds_YP_009865459.1_26	0.3016	0.39415
NC_049043.1_cds_YP_009865460.1_27	0.2798	0.4736
NC_049043.1_cds_YP_009865464.1_31	0.2928	0.3685
NC_049043.1_cds_YP_009865466.1_33	0.3281	0.40625
NC_049043.1_cds_YP_009865467.1_34	0.3174	0.33695
NC_049043.1_cds_YP_009865468.1_35	0.2928	0.45015
NC_049043.1_cds_YP_009865477.1_44	0.2455	0.37725
NC_049043.1_cds_YP_009865478.1_45	0.2417	0.3625
NC_049043.1_cds_YP_009865479.1_46	0.3226	0.50405
NC_049043.1_cds_YP_009865480.1_47	0.3046	0.47465
NC_049043.1_cds_YP_009865481.1_48	0.2967	0.50785
NC_049043.1_cds_YP_009865485.1_52	0.3056	0.44215
NC_049043.1_cds_YP_009865486.1_53	0.2112	0.4472
NC_049043.1_cds_YP_009865487.1_54	0.25	0.3705
NC_049043.1_cds_YP_009865488.1_55	0.2518	0.536
NC_049043.1_cds_YP_009865490.1_57	0.2519	0.3963
NC_049043.1_cds_YP_009865491.1_58	0.2846	0.43905
NC_049043.1_cds_YP_009865492.1_59	0.2941	0.5147
NC_049043.1_cds_YP_009865493.1_60	0.21	0.38585
NC_049043.1_cds_YP_009865495.1_62	0.3066	0.49635
NC_049043.1_cds_YP_009865497.1_64	0.365	0.3794
NC_049043.1_cds_YP_009865498.1_65	0.3185	0.4067
NC_049043.1_cds_YP_009865499.1_66	0.2372	0.48715
NC_049043.1_cds_YP_009865500.1_67	0.2347	0.348
NC_049043.1_cds_YP_009865502.1_69	0.2623	0.3318
NC_049043.1_cds_YP_009865503.1_70	0.302	0.378
NC_049043.1_cds_YP_009865505.1_72	0.2549	0.36275
NC_049043.1_cds_YP_009865506.1_73	0.2316	0.4011
NC_049043.1_cds_YP_009865507.1_74	0.2289	0.38555
NC_049043.1_cds_YP_009865508.1_75	0.206	0.39145
NC_049043.1_cds_YP_009865509.1_76	0.2538	0.43275
NC_049043.1_cds_YP_009865511.1_78	0.2554	0.3063
NC_049043.1_cds_YP_009865512.1_79	0.2372	0.48715
NC_049043.1_cds_YP_009865513.1_80	0.3185	0.4067
NC_049043.1_cds_YP_009865514.1_81	0.365	0.3794
NC_049043.1_cds_YP_009865516.1_83	0.3066	0.49635
NC_049044.1_cds_YP_009865517.1_1	0.3306	0.50405
NC_049044.1_cds_YP_009865518.1_2	0.3164	0.4647
NC_049044.1_cds_YP_009865519.1_3	0.281	0.32945
NC_049044.1_cds_YP_009865520.1_4	0.2962	0.5063
NC_049044.1_cds_YP_009865521.1_5	0.2846	0.48995
NC_049044.1_cds_YP_009865522.1_6	0.2761	0.4403
NC_049044.1_cds_YP_009865523.1_7	0.2479	0.39665
NC_049044.1_cds_YP_009865524.1_8	0.271	0.4486
NC_049044.1_cds_YP_009865525.1_9	0.283	0.434
NC_049044.1_cds_YP_009865526.1_10	0.2525	0.4332
NC_049044.1_cds_YP_009865527.1_11	0.2941	0.42945
NC_049044.1_cds_YP_009865528.1_12	0.3276	0.47605
NC_049044.1_cds_YP_009865529.1_13	0.302	0.4592
NC_049044.1_cds_YP_009865530.1_14	0.2574	0.45045
NC_049044.1_cds_YP_009865532.1_16	0.3207	0.49685
NC_049044.1_cds_YP_009865533.1_17	0.3192	0.476
NC_049044.1_cds_YP_009865536.1_20	0.2894	0.4342
NC_049044.1_cds_YP_009865537.1_21	0.2515	0.42985
NC_049044.1_cds_YP_009865538.1_22	0.2615	0.38325
NC_049044.1_cds_YP_009865539.1_23	0.2785	0.40505
NC_049044.1_cds_YP_009865540.1_24	0.25	0.41735
NC_049044.1_cds_YP_009865542.1_26	0.3098	0.39135
NC_049044.1_cds_YP_009865543.1_27	0.2779	0.47455
NC_049044.1_cds_YP_009865547.1_31	0.2849	0.36755
NC_049044.1_cds_YP_009865549.1_33	0.3243	0.4189
NC_049044.1_cds_YP_009865550.1_34	0.3174	0.33695
NC_049044.1_cds_YP_009865551.1_35	0.3022	0.45015
NC_049044.1_cds_YP_009865560.1_44	0.2596	0.3846
NC_049044.1_cds_YP_009865561.1_45	0.2583	0.3625
NC_049044.1_cds_YP_009865562.1_46	0.3306	0.50405
NC_049044.1_cds_YP_009865563.1_47	0.2959	0.477
NC_049044.1_cds_YP_009865564.1_48	0.2986	0.50685
NC_049044.1_cds_YP_009865568.1_52	0.3009	0.44215
NC_049044.1_cds_YP_009865569.1_53	0.2174	0.4472
NC_049044.1_cds_YP_009865570.1_54	0.247	0.3735
NC_049044.1_cds_YP_009865571.1_55	0.2446	0.536
NC_049044.1_cds_YP_009865573.1_57	0.2667	0.3926
NC_049044.1_cds_YP_009865574.1_58	0.2846	0.43905
NC_049044.1_cds_YP_009865575.1_59	0.2868	0.5147
NC_049044.1_cds_YP_009865576.1_60	0.21	0.38585
NC_049044.1_cds_YP_009865578.1_62	0.3152	0.4982
NC_049044.1_cds_YP_009865580.1_64	0.3646	0.37945
NC_049044.1_cds_YP_009865581.1_65	0.3185	0.4077
NC_049044.1_cds_YP_009865582.1_66	0.2372	0.48715
NC_049044.1_cds_YP_009865583.1_67	0.48	0.49
NC_049044.1_cds_YP_009865584.1_68	0.2262	0.3492
NC_049044.1_cds_YP_009865586.1_70	0.2623	0.3349
NC_049044.1_cds_YP_009865587.1_71	0.296	0.378
NC_049044.1_cds_YP_009865589.1_73	0.2647	0.36275
NC_049044.1_cds_YP_009865590.1_74	0.2429	0.39545
NC_049044.1_cds_YP_009865591.1_75	0.2169	0.38855
NC_049044.1_cds_YP_009865592.1_76	0.2088	0.39145
NC_049044.1_cds_YP_009865593.1_77	0.2563	0.434
NC_049044.1_cds_YP_009865595.1_79	0.253	0.30795
NC_049044.1_cds_YP_009865596.1_80	0.2372	0.48715
NC_049044.1_cds_YP_009865597.1_81	0.3185	0.4077
NC_049044.1_cds_YP_009865598.1_82	0.3646	0.37945
NC_049044.1_cds_YP_009865600.1_84	0.3152	0.4982
NC_049045.1_cds_YP_009865601.1_1	0.3226	0.50405
NC_049045.1_cds_YP_009865602.1_2	0.3164	0.4647
NC_049045.1_cds_YP_009865603.1_3	0.2888	0.3314
NC_049045.1_cds_YP_009865604.1_4	0.3004	0.50525
NC_049045.1_cds_YP_009865605.1_5	0.2866	0.48895
NC_049045.1_cds_YP_009865606.1_6	0.2761	0.43285
NC_049045.1_cds_YP_009865607.1_7	0.2479	0.39255
NC_049045.1_cds_YP_009865608.1_8	0.271	0.4486
NC_049045.1_cds_YP_009865609.1_9	0.2704	0.434
NC_049045.1_cds_YP_009865610.1_10	0.2525	0.43565
NC_049045.1_cds_YP_009865611.1_11	0.2959	0.43195
NC_049045.1_cds_YP_009865612.1_12	0.3289	0.4754
NC_049045.1_cds_YP_009865613.1_13	0.2993	0.4585
NC_049045.1_cds_YP_009865614.1_14	0.2574	0.45045
NC_049045.1_cds_YP_009865616.1_16	0.3186	0.4979
NC_049045.1_cds_YP_009865617.1_17	0.3164	0.476
NC_049045.1_cds_YP_009865620.1_20	0.2913	0.43465
NC_049045.1_cds_YP_009865621.1_21	0.2504	0.43115
NC_049045.1_cds_YP_009865622.1_22	0.2619	0.38385
NC_049045.1_cds_YP_009865623.1_23	0.2785	0.4072
NC_049045.1_cds_YP_009865624.1_24	0.25	0.41735
NC_049045.1_cds_YP_009865626.1_26	0.3152	0.3886
NC_049045.1_cds_YP_009865627.1_27	0.2798	0.4736
NC_049045.1_cds_YP_009865631.1_31	0.2908	0.3695
NC_049045.1_cds_YP_009865633.1_33	0.3229	0.40625
NC_049045.1_cds_YP_009865634.1_34	0.3174	0.33695
NC_049045.1_cds_YP_009865635.1_35	0.296	0.45015
NC_049045.1_cds_YP_009865644.1_44	0.25	0.3798
NC_049045.1_cds_YP_009865645.1_45	0.25	0.3625
NC_049045.1_cds_YP_009865646.1_46	0.3226	0.50405
NC_049045.1_cds_YP_009865647.1_47	0.2959	0.477
NC_049045.1_cds_YP_009865648.1_48	0.3026	0.50885
NC_049045.1_cds_YP_009865652.1_52	0.3009	0.44215
NC_049045.1_cds_YP_009865653.1_53	0.2174	0.4472
NC_049045.1_cds_YP_009865654.1_54	0.25	0.3705
NC_049045.1_cds_YP_009865655.1_55	0.2446	0.536
NC_049045.1_cds_YP_009865657.1_57	0.2741	0.3926
NC_049045.1_cds_YP_009865658.1_58	0.2846	0.43905
NC_049045.1_cds_YP_009865659.1_59	0.2794	0.5147
NC_049045.1_cds_YP_009865660.1_60	0.21	0.38585
NC_049045.1_cds_YP_009865662.1_62	0.3175	0.49815
NC_049045.1_cds_YP_009865664.1_64	0.365	0.3794
NC_049045.1_cds_YP_009865665.1_65	0.3185	0.4067
NC_049045.1_cds_YP_009865666.1_66	0.2372	0.48715
NC_049045.1_cds_YP_009865667.1_67	0.4805	0.48375
NC_049045.1_cds_YP_009865668.1_68	0.2327	0.3477
NC_049045.1_cds_YP_009865670.1_70	0.2654	0.33335
NC_049045.1_cds_YP_009865671.1_71	0.3	0.378
NC_049045.1_cds_YP_009865673.1_73	0.2647	0.36275
NC_049045.1_cds_YP_009865674.1_74	0.226	0.4011
NC_049045.1_cds_YP_009865675.1_75	0.2289	0.39155
NC_049045.1_cds_YP_009865676.1_76	0.206	0.38875
NC_049045.1_cds_YP_009865677.1_77	0.2563	0.434
NC_049045.1_cds_YP_009865679.1_79	0.2443	0.30795
NC_049045.1_cds_YP_009865680.1_80	0.2372	0.48715
NC_049045.1_cds_YP_009865681.1_81	0.3185	0.4067
NC_049045.1_cds_YP_009865682.1_82	0.365	0.3794
NC_049045.1_cds_YP_009865684.1_84	0.3187	0.49815
NC_049046.1_cds_YP_009865685.1_1	0.3306	0.50405
NC_049046.1_cds_YP_009865686.1_2	0.3164	0.4647
NC_049046.1_cds_YP_009865687.1_3	0.2719	0.3308
NC_049046.1_cds_YP_009865688.1_4	0.2941	0.5042
NC_049046.1_cds_YP_009865689.1_5	0.2846	0.48795
NC_049046.1_cds_YP_009865690.1_6	0.2761	0.4366
NC_049046.1_cds_YP_009865691.1_7	0.2479	0.39665
NC_049046.1_cds_YP_009865692.1_8	0.2757	0.4486
NC_049046.1_cds_YP_009865693.1_9	0.2767	0.434
NC_049046.1_cds_YP_009865694.1_10	0.2426	0.4307
NC_049046.1_cds_YP_009865695.1_11	0.284	0.429
NC_049046.1_cds_YP_009865696.1_12	0.3222	0.4754
NC_049046.1_cds_YP_009865697.1_13	0.302	0.45855
NC_049046.1_cds_YP_009865698.1_14	0.2574	0.45045
NC_049046.1_cds_YP_009865700.1_16	0.3207	0.49685
NC_049046.1_cds_YP_009865701.1_17	0.3164	0.476
NC_049046.1_cds_YP_009865704.1_20	0.2885	0.43325
NC_049046.1_cds_YP_009865705.1_21	0.2518	0.4312
NC_049046.1_cds_YP_009865706.1_22	0.2579	0.38295
NC_049046.1_cds_YP_009865707.1_23	0.2827	0.40505
NC_049046.1_cds_YP_009865708.1_24	0.25	0.41735
NC_049046.1_cds_YP_009865710.1_26	0.3098	0.39135
NC_049046.1_cds_YP_009865711.1_27	0.2759	0.4726
NC_049046.1_cds_YP_009865715.1_31	0.2869	0.36655
NC_049046.1_cds_YP_009865717.1_33	0.3229	0.41145
NC_049046.1_cds_YP_009865718.1_34	0.3174	0.33695
NC_049046.1_cds_YP_009865719.1_35	0.2991	0.4486
NC_049046.1_cds_YP_009865728.1_44	0.2455	0.37725
NC_049046.1_cds_YP_009865729.1_45	0.2583	0.3625
NC_049046.1_cds_YP_009865730.1_46	0.3306	0.50405
NC_049046.1_cds_YP_009865731.1_47	0.2929	0.4722
NC_049046.1_cds_YP_009865732.1_48	0.3006	0.50885
NC_049046.1_cds_YP_009865736.1_52	0.3009	0.44215
NC_049046.1_cds_YP_009865737.1_53	0.2112	0.4472
NC_049046.1_cds_YP_009865738.1_54	0.247	0.372
NC_049046.1_cds_YP_009865739.1_55	0.2302	0.5324
NC_049046.1_cds_YP_009865741.1_57	0.2667	0.3926
NC_049046.1_cds_YP_009865742.1_58	0.2846	0.43905
NC_049046.1_cds_YP_009865743.1_59	0.2868	0.5147
NC_049046.1_cds_YP_009865744.1_60	0.21	0.38355
NC_049046.1_cds_YP_009865746.1_62	0.3152	0.4982
NC_049046.1_cds_YP_009865748.1_64	0.3649	0.37955
NC_049046.1_cds_YP_009865749.1_65	0.3185	0.4077
NC_049046.1_cds_YP_009865750.1_66	0.2372	0.48715
NC_049046.1_cds_YP_009865751.1_67	0.2277	0.34825
NC_049046.1_cds_YP_009865753.1_69	0.2654	0.33645
NC_049046.1_cds_YP_009865754.1_70	0.3	0.377
NC_049046.1_cds_YP_009865756.1_72	0.2745	0.36275
NC_049046.1_cds_YP_009865757.1_73	0.2316	0.3955
NC_049046.1_cds_YP_009865758.1_74	0.2169	0.38555
NC_049046.1_cds_YP_009865759.1_75	0.2088	0.38735
NC_049046.1_cds_YP_009865760.1_76	0.2526	0.4311
NC_049046.1_cds_YP_009865762.1_78	0.2499	0.3079
NC_049046.1_cds_YP_009865763.1_79	0.2372	0.48715
NC_049046.1_cds_YP_009865764.1_80	0.3185	0.4077
NC_049046.1_cds_YP_009865765.1_81	0.3649	0.37955
NC_049046.1_cds_YP_009865767.1_83	0.3152	0.4982
NC_049047.1_cds_YP_009865768.1_1	0.3226	0.50405
NC_049047.1_cds_YP_009865769.1_2	0.3164	0.4647
NC_049047.1_cds_YP_009865770.1_3	0.2868	0.32945
NC_049047.1_cds_YP_009865771.1_4	0.3046	0.50315
NC_049047.1_cds_YP_009865772.1_5	0.2846	0.48995
NC_049047.1_cds_YP_009865773.1_6	0.2761	0.4366
NC_049047.1_cds_YP_009865774.1_7	0.2562	0.39665
NC_049047.1_cds_YP_009865775.1_8	0.271	0.4486
NC_049047.1_cds_YP_009865776.1_9	0.2704	0.434
NC_049047.1_cds_YP_009865777.1_10	0.2475	0.43565
NC_049047.1_cds_YP_009865778.1_11	0.2959	0.43195
NC_049047.1_cds_YP_009865779.1_12	0.3276	0.4754
NC_049047.1_cds_YP_009865780.1_13	0.3034	0.45855
NC_049047.1_cds_YP_009865781.1_14	0.2574	0.4554
NC_049047.1_cds_YP_009865783.1_16	0.3165	0.49685
NC_049047.1_cds_YP_009865784.1_17	0.3192	0.476
NC_049047.1_cds_YP_009865787.1_20	0.2904	0.43465
NC_049047.1_cds_YP_009865788.1_21	0.2515	0.432
NC_049047.1_cds_YP_009865789.1_22	0.2592	0.38375
NC_049047.1_cds_YP_009865790.1_23	0.2785	0.4072
NC_049047.1_cds_YP_009865791.1_24	0.25	0.41735
NC_049047.1_cds_YP_009865793.1_26	0.3032	0.3936
NC_049047.1_cds_YP_009865794.1_27	0.2798	0.4736
NC_049047.1_cds_YP_009865798.1_31	0.2888	0.3705
NC_049047.1_cds_YP_009865800.1_33	0.3194	0.4084
NC_049047.1_cds_YP_009865801.1_34	0.3174	0.33695
NC_049047.1_cds_YP_009865802.1_35	0.2991	0.45015
NC_049047.1_cds_YP_009865811.1_44	0.25	0.3846
NC_049047.1_cds_YP_009865812.1_45	0.25	0.3625
NC_049047.1_cds_YP_009865813.1_46	0.3226	0.50405
NC_049047.1_cds_YP_009865814.1_47	0.298	0.47225
NC_049047.1_cds_YP_009865815.1_48	0.2967	0.50885
NC_049047.1_cds_YP_009865819.1_52	0.3056	0.44215
NC_049047.1_cds_YP_009865820.1_53	0.2236	0.4472
NC_049047.1_cds_YP_009865821.1_54	0.25	0.372
NC_049047.1_cds_YP_009865822.1_55	0.2446	0.536
NC_049047.1_cds_YP_009865824.1_57	0.2667	0.3926
NC_049047.1_cds_YP_009865825.1_58	0.2846	0.43905
NC_049047.1_cds_YP_009865826.1_59	0.2868	0.5147
NC_049047.1_cds_YP_009865827.1_60	0.2146	0.38585
NC_049047.1_cds_YP_009865829.1_62	0.315	0.49635
NC_049047.1_cds_YP_009865831.1_64	0.3646	0.3792
NC_049047.1_cds_YP_009865832.1_65	0.3185	0.4067
NC_049047.1_cds_YP_009865833.1_66	0.2372	0.48715
NC_049047.1_cds_YP_009865834.1_67	0.2317	0.3502
NC_049047.1_cds_YP_009865836.1_69	0.2623	0.3349
NC_049047.1_cds_YP_009865837.1_70	0.296	0.379
NC_049047.1_cds_YP_009865839.1_72	0.2745	0.36275
NC_049047.1_cds_YP_009865840.1_73	0.2316	0.40395
NC_049047.1_cds_YP_009865841.1_74	0.2229	0.38855
NC_049047.1_cds_YP_009865842.1_75	0.2033	0.3901
NC_049047.1_cds_YP_009865843.1_76	0.2589	0.434
NC_049047.1_cds_YP_009865845.1_78	0.2493	0.3062
NC_049047.1_cds_YP_009865846.1_79	0.2372	0.48715
NC_049047.1_cds_YP_009865847.1_80	0.3185	0.4067
NC_049047.1_cds_YP_009865848.1_81	0.3646	0.3792
NC_049047.1_cds_YP_009865850.1_83	0.315	0.49635
NC_049048.1_cds_YP_009865851.1_1	0.3226	0.50405
NC_049048.1_cds_YP_009865852.1_2	0.3136	0.4647
NC_049048.1_cds_YP_009865853.1_3	0.2849	0.3304
NC_049048.1_cds_YP_009865854.1_4	0.2983	0.50525
NC_049048.1_cds_YP_009865855.1_5	0.2866	0.48995
NC_049048.1_cds_YP_009865856.1_6	0.2761	0.4366
NC_049048.1_cds_YP_009865857.1_7	0.2479	0.39665
NC_049048.1_cds_YP_009865858.1_8	0.2757	0.4463
NC_049048.1_cds_YP_009865859.1_9	0.283	0.434
NC_049048.1_cds_YP_009865860.1_10	0.2426	0.43565
NC_049048.1_cds_YP_009865861.1_11	0.2959	0.429
NC_049048.1_cds_YP_009865862.1_12	0.3249	0.4754
NC_049048.1_cds_YP_009865863.1_13	0.3007	0.45855
NC_049048.1_cds_YP_009865864.1_14	0.2574	0.45045
NC_049048.1_cds_YP_009865866.1_16	0.3143	0.49575
NC_049048.1_cds_YP_009865867.1_17	0.3136	0.476
NC_049048.1_cds_YP_009865870.1_20	0.2857	0.4351
NC_049048.1_cds_YP_009865871.1_21	0.2518	0.4319
NC_049048.1_cds_YP_009865872.1_22	0.2616	0.38295
NC_049048.1_cds_YP_009865873.1_23	0.2785	0.4072
NC_049048.1_cds_YP_009865874.1_24	0.254	0.41735
NC_049048.1_cds_YP_009865876.1_26	0.3098	0.39135
NC_049048.1_cds_YP_009865877.1_27	0.2798	0.4736
NC_049048.1_cds_YP_009865881.1_31	0.2888	0.3675
NC_049048.1_cds_YP_009865883.1_33	0.3229	0.41145
NC_049048.1_cds_YP_009865884.1_34	0.3217	0.33695
NC_049048.1_cds_YP_009865885.1_35	0.2991	0.45015
NC_049048.1_cds_YP_009865894.1_44	0.25	0.3846
NC_049048.1_cds_YP_009865895.1_45	0.2333	0.36665
NC_049048.1_cds_YP_009865896.1_46	0.3226	0.50405
NC_049048.1_cds_YP_009865897.1_47	0.2944	0.47465
NC_049048.1_cds_YP_009865898.1_48	0.3045	0.50885
NC_049048.1_cds_YP_009865902.1_52	0.3056	0.43985
NC_049048.1_cds_YP_009865903.1_53	0.2174	0.4472
NC_049048.1_cds_YP_009865904.1_54	0.247	0.3735
NC_049048.1_cds_YP_009865905.1_55	0.2446	0.5324
NC_049048.1_cds_YP_009865907.1_57	0.2667	0.3926
NC_049048.1_cds_YP_009865908.1_58	0.2764	0.43905
NC_049048.1_cds_YP_009865909.1_59	0.2868	0.5147
NC_049048.1_cds_YP_009865910.1_60	0.2146	0.38815
NC_049048.1_cds_YP_009865912.1_62	0.3188	0.4982
NC_049048.1_cds_YP_009865914.1_64	0.3649	0.37975
NC_049048.1_cds_YP_009865915.1_65	0.3205	0.4067
NC_049048.1_cds_YP_009865916.1_66	0.2372	0.48715
NC_049048.1_cds_YP_009865917.1_67	0.4805	0.48375
NC_049048.1_cds_YP_009865918.1_68	0.232	0.3507
NC_049048.1_cds_YP_009865920.1_70	0.2623	0.338
NC_049048.1_cds_YP_009865921.1_71	0.3	0.379
NC_049048.1_cds_YP_009865923.1_73	0.2745	0.36275
NC_049048.1_cds_YP_009865924.1_74	0.226	0.4011
NC_049048.1_cds_YP_009865925.1_75	0.2229	0.3916
NC_049048.1_cds_YP_009865926.1_76	0.2033	0.39285
NC_049048.1_cds_YP_009865927.1_77	0.2563	0.434
NC_049048.1_cds_YP_009865929.1_79	0.2533	0.30755
NC_049048.1_cds_YP_009865930.1_80	0.2372	0.48715
NC_049048.1_cds_YP_009865931.1_81	0.3205	0.4067
NC_049048.1_cds_YP_009865932.1_82	0.3649	0.37975
NC_049048.1_cds_YP_009865934.1_84	0.3188	0.4982
NC_049049.1_cds_YP_009865935.1_1	0.3226	0.50405
NC_049049.1_cds_YP_009865936.1_2	0.3192	0.4647
NC_049049.1_cds_YP_009865937.1_3	0.2868	0.3304
NC_049049.1_cds_YP_009865938.1_4	0.2962	0.5063
NC_049049.1_cds_YP_009865939.1_5	0.2886	0.48995
NC_049049.1_cds_YP_009865940.1_6	0.2761	0.4366
NC_049049.1_cds_YP_009865941.1_7	0.2479	0.39255
NC_049049.1_cds_YP_009865942.1_8	0.2757	0.45095
NC_049049.1_cds_YP_009865943.1_9	0.2704	0.434
NC_049049.1_cds_YP_009865944.1_10	0.2525	0.43815
NC_049049.1_cds_YP_009865945.1_11	0.2959	0.43195
NC_049049.1_cds_YP_009865946.1_12	0.3276	0.4754
NC_049049.1_cds_YP_009865947.1_13	0.3007	0.4585
NC_049049.1_cds_YP_009865948.1_14	0.2574	0.46035
NC_049049.1_cds_YP_009865950.1_16	0.3186	0.49685
NC_049049.1_cds_YP_009865951.1_17	0.3164	0.476
NC_049049.1_cds_YP_009865954.1_20	0.2885	0.4337
NC_049049.1_cds_YP_009865955.1_21	0.2504	0.43115
NC_049049.1_cds_YP_009865956.1_22	0.2581	0.38285
NC_049049.1_cds_YP_009865957.1_23	0.2785	0.4072
NC_049049.1_cds_YP_009865958.1_24	0.25	0.41735
NC_049049.1_cds_YP_009865960.1_26	0.3085	0.3936
NC_049049.1_cds_YP_009865961.1_27	0.2779	0.4736
NC_049049.1_cds_YP_009865965.1_31	0.2908	0.3715
NC_049049.1_cds_YP_009865967.1_33	0.3229	0.40625
NC_049049.1_cds_YP_009865968.1_34	0.313	0.33695
NC_049049.1_cds_YP_009865969.1_35	0.296	0.45015
NC_049049.1_cds_YP_009865978.1_44	0.25	0.3846
NC_049049.1_cds_YP_009865979.1_45	0.25	0.3625
NC_049049.1_cds_YP_009865980.1_46	0.3226	0.50405
NC_049049.1_cds_YP_009865981.1_47	0.2995	0.47465
NC_049049.1_cds_YP_009865982.1_48	0.3026	0.50885
NC_049049.1_cds_YP_009865986.1_52	0.3056	0.44215
NC_049049.1_cds_YP_009865987.1_53	0.2174	0.4472
NC_049049.1_cds_YP_009865988.1_54	0.253	0.36895
NC_049049.1_cds_YP_009865989.1_55	0.2446	0.536
NC_049049.1_cds_YP_009865991.1_57	0.2741	0.3926
NC_049049.1_cds_YP_009865992.1_58	0.2846	0.43905
NC_049049.1_cds_YP_009865993.1_59	0.2868	0.5147
NC_049049.1_cds_YP_009865994.1_60	0.21	0.38815
NC_049049.1_cds_YP_009865996.1_62	0.3187	0.49635
NC_049049.1_cds_YP_009865998.1_64	0.3654	0.3794
NC_049049.1_cds_YP_009865999.1_65	0.3164	0.4067
NC_049049.1_cds_YP_009866000.1_66	0.2372	0.48715
NC_049049.1_cds_YP_009866001.1_67	0.4805	0.48375
NC_049049.1_cds_YP_009866002.1_68	0.223	0.35555
NC_049049.1_cds_YP_009866004.1_70	0.2623	0.3349
NC_049049.1_cds_YP_009866005.1_71	0.296	0.378
NC_049049.1_cds_YP_009866007.1_73	0.2647	0.36275
NC_049049.1_cds_YP_009866008.1_74	0.2316	0.4011
NC_049049.1_cds_YP_009866009.1_75	0.2108	0.38855
NC_049049.1_cds_YP_009866010.1_76	0.2088	0.3901
NC_049049.1_cds_YP_009866011.1_77	0.2538	0.434
NC_049049.1_cds_YP_009866013.1_79	0.251	0.3071
NC_049049.1_cds_YP_009866014.1_80	0.2372	0.48715
NC_049049.1_cds_YP_009866015.1_81	0.3164	0.4067
NC_049049.1_cds_YP_009866016.1_82	0.3654	0.3794
NC_049049.1_cds_YP_009866018.1_84	0.3187	0.49635
NC_049050.1_cds_YP_009866019.1_1	0.3226	0.50405
NC_049050.1_cds_YP_009866020.1_2	0.3164	0.4647
NC_049050.1_cds_YP_009866021.1_3	0.2907	0.3285
NC_049050.1_cds_YP_009866022.1_4	0.2983	0.50315
NC_049050.1_cds_YP_009866023.1_5	0.2826	0.48895
NC_049050.1_cds_YP_009866024.1_6	0.2761	0.43285
NC_049050.1_cds_YP_009866025.1_7	0.2479	0.39665
NC_049050.1_cds_YP_009866026.1_8	0.2757	0.4509
NC_049050.1_cds_YP_009866027.1_9	0.2704	0.434
NC_049050.1_cds_YP_009866028.1_10	0.2475	0.43565
NC_049050.1_cds_YP_009866029.1_11	0.3	0.4353
NC_049050.1_cds_YP_009866030.1_12	0.3249	0.4754
NC_049050.1_cds_YP_009866031.1_13	0.3034	0.4585
NC_049050.1_cds_YP_009866032.1_14	0.2574	0.4554
NC_049050.1_cds_YP_009866034.1_16	0.3249	0.4958
NC_049050.1_cds_YP_009866035.1_17	0.3164	0.476
NC_049050.1_cds_YP_009866038.1_20	0.2885	0.4342
NC_049050.1_cds_YP_009866039.1_21	0.2504	0.4319
NC_049050.1_cds_YP_009866040.1_22	0.2601	0.38365
NC_049050.1_cds_YP_009866041.1_23	0.2743	0.4072
NC_049050.1_cds_YP_009866042.1_24	0.254	0.41735
NC_049050.1_cds_YP_009866044.1_26	0.3085	0.3936
NC_049050.1_cds_YP_009866045.1_27	0.2779	0.4736
NC_049050.1_cds_YP_009866049.1_31	0.2908	0.3685
NC_049050.1_cds_YP_009866051.1_33	0.3229	0.40625
NC_049050.1_cds_YP_009866052.1_34	0.3174	0.33695
NC_049050.1_cds_YP_009866053.1_35	0.2991	0.45015
NC_049050.1_cds_YP_009866062.1_44	0.25	0.3846
NC_049050.1_cds_YP_009866063.1_45	0.25	0.3625
NC_049050.1_cds_YP_009866064.1_46	0.3226	0.50405
NC_049050.1_cds_YP_009866065.1_47	0.301	0.477
NC_049050.1_cds_YP_009866066.1_48	0.3045	0.50785
NC_049050.1_cds_YP_009866070.1_52	0.3009	0.4398
NC_049050.1_cds_YP_009866071.1_53	0.2112	0.4472
NC_049050.1_cds_YP_009866072.1_54	0.25	0.3705
NC_049050.1_cds_YP_009866073.1_55	0.2446	0.536
NC_049050.1_cds_YP_009866075.1_57	0.2667	0.3889
NC_049050.1_cds_YP_009866076.1_58	0.2846	0.43905
NC_049050.1_cds_YP_009866077.1_59	0.2941	0.51105
NC_049050.1_cds_YP_009866078.1_60	0.21	0.38355
NC_049050.1_cds_YP_009866080.1_62	0.315	0.49635
NC_049050.1_cds_YP_009866082.1_64	0.3646	0.37965
NC_049050.1_cds_YP_009866083.1_65	0.3185	0.4067
NC_049050.1_cds_YP_009866084.1_66	0.2372	0.48715
NC_049050.1_cds_YP_009866085.1_67	0.4805	0.48375
NC_049050.1_cds_YP_009866086.1_68	0.2357	0.34885
NC_049050.1_cds_YP_009866088.1_70	0.2623	0.33025
NC_049050.1_cds_YP_009866089.1_71	0.3	0.378
NC_049050.1_cds_YP_009866091.1_73	0.2647	0.36275
NC_049050.1_cds_YP_009866092.1_74	0.2316	0.4011
NC_049050.1_cds_YP_009866093.1_75	0.2349	0.38855
NC_049050.1_cds_YP_009866094.1_76	0.2055	0.39315
NC_049050.1_cds_YP_009866095.1_77	0.2563	0.43525
NC_049050.1_cds_YP_009866097.1_79	0.2507	0.30985
NC_049050.1_cds_YP_009866098.1_80	0.2372	0.48715
NC_049050.1_cds_YP_009866099.1_81	0.3185	0.4067
NC_049050.1_cds_YP_009866100.1_82	0.3646	0.37965
NC_049050.1_cds_YP_009866102.1_84	0.315	0.49635
NC_053827.1_cds_YP_010029669.1_1	0.3226	0.50405
NC_053827.1_cds_YP_010029670.1_2	0.3192	0.4661
NC_053827.1_cds_YP_010029671.1_3	0.281	0.3304
NC_053827.1_cds_YP_010029672.1_4	0.2983	0.5063
NC_053827.1_cds_YP_010029673.1_5	0.2866	0.48795
NC_053827.1_cds_YP_010029674.1_6	0.291	0.43285
NC_053827.1_cds_YP_010029675.1_7	0.2479	0.39665
NC_053827.1_cds_YP_010029676.1_8	0.2757	0.4486
NC_053827.1_cds_YP_010029677.1_9	0.283	0.43085
NC_053827.1_cds_YP_010029678.1_10	0.2475	0.43815
NC_053827.1_cds_YP_010029679.1_11	0.3018	0.43195
NC_053827.1_cds_YP_010029680.1_12	0.3222	0.4754
NC_053827.1_cds_YP_010029681.1_13	0.3061	0.4599
NC_053827.1_cds_YP_010029682.1_14	0.2574	0.45045
NC_053827.1_cds_YP_010029684.1_16	0.3122	0.49685
NC_053827.1_cds_YP_010029685.1_17	0.3192	0.476
NC_053827.1_cds_YP_010029688.1_20	0.2838	0.43465
NC_053827.1_cds_YP_010029689.1_21	0.2518	0.4312
NC_053827.1_cds_YP_010029690.1_22	0.258	0.38515
NC_053827.1_cds_YP_010029691.1_23	0.2785	0.4093
NC_053827.1_cds_YP_010029692.1_24	0.2419	0.41735
NC_053827.1_cds_YP_010029694.1_26	0.3098	0.3886
NC_053827.1_cds_YP_010029695.1_27	0.2868	0.47445
NC_053827.1_cds_YP_010029699.1_31	0.2869	0.3675
NC_053827.1_cds_YP_010029701.1_33	0.3281	0.40365
NC_053827.1_cds_YP_010029702.1_34	0.3261	0.33915
NC_053827.1_cds_YP_010029703.1_35	0.2991	0.44705
NC_053827.1_cds_YP_010029713.1_45	0.2583	0.36665
NC_053827.1_cds_YP_010029714.1_46	0.3226	0.50405
NC_053827.1_cds_YP_010029715.1_47	0.2944	0.47465
NC_053827.1_cds_YP_010029716.1_48	0.3045	0.5079
NC_053827.1_cds_YP_010029720.1_52	0.3009	0.44215
NC_053827.1_cds_YP_010029721.1_53	0.2174	0.4472
NC_053827.1_cds_YP_010029722.1_54	0.25	0.3705
NC_053827.1_cds_YP_010029723.1_55	0.2518	0.536
NC_053827.1_cds_YP_010029725.1_57	0.2741	0.3852
NC_053827.1_cds_YP_010029726.1_58	0.2764	0.43905
NC_053827.1_cds_YP_010029727.1_59	0.2868	0.5147
NC_053827.1_cds_YP_010029728.1_60	0.2146	0.38585
NC_053827.1_cds_YP_010029730.1_62	0.3164	0.49815
NC_053827.1_cds_YP_010029732.1_64	0.3649	0.3793
NC_053827.1_cds_YP_010029733.1_65	0.3205	0.4077
NC_053827.1_cds_YP_010029734.1_66	0.2372	0.4904
NC_053827.1_cds_YP_010029735.1_67	0.2469	0.3048
NC_053827.1_cds_YP_010029737.1_69	0.2487	0.43275
NC_053827.1_cds_YP_010029738.1_70	0.2005	0.39285
NC_053827.1_cds_YP_010029739.1_71	0.2229	0.39155
NC_053827.1_cds_YP_010029740.1_72	0.2373	0.4011
NC_053827.1_cds_YP_010029741.1_73	0.2647	0.36275
NC_053827.1_cds_YP_010029743.1_75	0.302	0.378
NC_053827.1_cds_YP_010029744.1_76	0.2593	0.3318
NC_053827.1_cds_YP_010029746.1_78	0.2331	0.3477
NC_053827.1_cds_YP_010029747.1_79	0.2372	0.4904
NC_053827.1_cds_YP_010029748.1_80	0.3205	0.4077
NC_053827.1_cds_YP_010029749.1_81	0.3649	0.3793
NC_053827.1_cds_YP_010029751.1_83	0.3164	0.49815
NC_058536.1_cds_YP_010188283.1_1	0.3226	0.50405
NC_058536.1_cds_YP_010188284.1_2	0.3164	0.4661
NC_058536.1_cds_YP_010188285.1_3	0.2907	0.33235
NC_058536.1_cds_YP_010188286.1_4	0.3004	0.50525
NC_058536.1_cds_YP_010188287.1_5	0.2906	0.49095
NC_058536.1_cds_YP_010188288.1_6	0.2836	0.43655
NC_058536.1_cds_YP_010188289.1_7	0.2562	0.39665
NC_058536.1_cds_YP_010188290.1_8	0.2757	0.4486
NC_058536.1_cds_YP_010188291.1_9	0.2704	0.43085
NC_058536.1_cds_YP_010188292.1_10	0.2475	0.43565
NC_058536.1_cds_YP_010188293.1_11	0.3018	0.429
NC_058536.1_cds_YP_010188294.1_12	0.3209	0.4754
NC_058536.1_cds_YP_010188295.1_13	0.3075	0.4592
NC_058536.1_cds_YP_010188296.1_14	0.2574	0.4455
NC_058536.1_cds_YP_010188298.1_16	0.3143	0.4947
NC_058536.1_cds_YP_010188299.1_17	0.3164	0.476
NC_058536.1_cds_YP_010188302.1_20	0.2848	0.43605
NC_058536.1_cds_YP_010188303.1_21	0.2529	0.432
NC_058536.1_cds_YP_010188304.1_22	0.261	0.38355
NC_058536.1_cds_YP_010188305.1_23	0.2785	0.40505
NC_058536.1_cds_YP_010188306.1_24	0.2419	0.4153
NC_058536.1_cds_YP_010188308.1_26	0.3098	0.39135
NC_058536.1_cds_YP_010188309.1_27	0.2857	0.47455
NC_058536.1_cds_YP_010188313.1_31	0.2908	0.3695
NC_058536.1_cds_YP_010188315.1_33	0.3281	0.40365
NC_058536.1_cds_YP_010188316.1_34	0.3348	0.337
NC_058536.1_cds_YP_010188317.1_35	0.2991	0.4486
NC_058536.1_cds_YP_010188326.1_44	0.2692	0.3846
NC_058536.1_cds_YP_010188327.1_45	0.2667	0.3625
NC_058536.1_cds_YP_010188328.1_46	0.3226	0.50405
NC_058536.1_cds_YP_010188329.1_47	0.2995	0.47465
NC_058536.1_cds_YP_010188330.1_48	0.3124	0.5079
NC_058536.1_cds_YP_010188334.1_52	0.3102	0.44215
NC_058536.1_cds_YP_010188335.1_53	0.2236	0.4472
NC_058536.1_cds_YP_010188336.1_54	0.2508	0.37
NC_058536.1_cds_YP_010188337.1_55	0.2662	0.536
NC_058536.1_cds_YP_010188339.1_57	0.2741	0.3852
NC_058536.1_cds_YP_010188340.1_58	0.2927	0.43905
NC_058536.1_cds_YP_010188341.1_59	0.2941	0.5147
NC_058536.1_cds_YP_010188342.1_60	0.2146	0.38355
NC_058536.1_cds_YP_010188344.1_62	0.32	0.49815
NC_058536.1_cds_YP_010188346.1_64	0.3641	0.37985
NC_058536.1_cds_YP_010188347.1_65	0.3185	0.4067
NC_058536.1_cds_YP_010188348.1_66	0.2372	0.4904
NC_058536.1_cds_YP_010188349.1_67	0.2265	0.35165
NC_058536.1_cds_YP_010188351.1_69	0.2685	0.3349
NC_058536.1_cds_YP_010188352.1_70	0.31	0.381
NC_058536.1_cds_YP_010188354.1_72	0.2647	0.36275
NC_058536.1_cds_YP_010188355.1_73	0.2373	0.4011
NC_058536.1_cds_YP_010188356.1_74	0.2289	0.39155
NC_058536.1_cds_YP_010188357.1_75	0.2033	0.3942
NC_058536.1_cds_YP_010188358.1_76	0.2563	0.43275
NC_058536.1_cds_YP_010188360.1_78	0.2492	0.30635
NC_058536.1_cds_YP_010188361.1_79	0.2372	0.4904
NC_058536.1_cds_YP_010188362.1_80	0.3185	0.4067
NC_058536.1_cds_YP_010188363.1_81	0.3641	0.37985
NC_058536.1_cds_YP_010188365.1_83	0.32	0.49815
NC_058537.1_cds_YP_010188366.1_1	0.3226	0.50405
NC_058537.1_cds_YP_010188367.1_2	0.3164	0.4647
NC_058537.1_cds_YP_010188368.1_3	0.2907	0.3314
NC_058537.1_cds_YP_010188369.1_4	0.2983	0.50525
NC_058537.1_cds_YP_010188370.1_5	0.2846	0.48995
NC_058537.1_cds_YP_010188371.1_6	0.2761	0.43285
NC_058537.1_cds_YP_010188372.1_7	0.2479	0.39665
NC_058537.1_cds_YP_010188373.1_8	0.2664	0.44625
NC_058537.1_cds_YP_010188374.1_9	0.283	0.434
NC_058537.1_cds_YP_010188375.1_10	0.2475	0.4307
NC_058537.1_cds_YP_010188376.1_11	0.3018	0.43195
NC_058537.1_cds_YP_010188377.1_12	0.3236	0.4754
NC_058537.1_cds_YP_010188378.1_13	0.302	0.45855
NC_058537.1_cds_YP_010188379.1_14	0.2574	0.45045
NC_058537.1_cds_YP_010188381.1_16	0.3122	0.49685
NC_058537.1_cds_YP_010188382.1_17	0.3107	0.476
NC_058537.1_cds_YP_010188385.1_20	0.2876	0.4332
NC_058537.1_cds_YP_010188386.1_21	0.2489	0.4319
NC_058537.1_cds_YP_010188387.1_22	0.2605	0.38495
NC_058537.1_cds_YP_010188388.1_23	0.2743	0.4114
NC_058537.1_cds_YP_010188389.1_24	0.25	0.41735
NC_058537.1_cds_YP_010188391.1_26	0.3043	0.3886
NC_058537.1_cds_YP_010188392.1_27	0.2779	0.4736
NC_058537.1_cds_YP_010188395.1_30	0.2908	0.3695
NC_058537.1_cds_YP_010188397.1_32	0.3229	0.40625
NC_058537.1_cds_YP_010188398.1_33	0.3174	0.3348
NC_058537.1_cds_YP_010188399.1_34	0.2991	0.45015
NC_058537.1_cds_YP_010188408.1_43	0.2261	0.3739
NC_058537.1_cds_YP_010188409.1_44	0.25	0.36665
NC_058537.1_cds_YP_010188410.1_45	0.3226	0.50405
NC_058537.1_cds_YP_010188411.1_46	0.2995	0.47465
NC_058537.1_cds_YP_010188412.1_47	0.3045	0.50885
NC_058537.1_cds_YP_010188416.1_51	0.3056	0.44215
NC_058537.1_cds_YP_010188417.1_52	0.2174	0.4472
NC_058537.1_cds_YP_010188418.1_53	0.247	0.3735
NC_058537.1_cds_YP_010188419.1_54	0.2518	0.536
NC_058537.1_cds_YP_010188421.1_56	0.2667	0.3926
NC_058537.1_cds_YP_010188422.1_57	0.2846	0.43905
NC_058537.1_cds_YP_010188423.1_58	0.2868	0.5147
NC_058537.1_cds_YP_010188424.1_59	0.21	0.379
NC_058537.1_cds_YP_010188426.1_61	0.3164	0.49815
NC_058537.1_cds_YP_010188428.1_63	0.3646	0.37945
NC_058537.1_cds_YP_010188429.1_64	0.3185	0.4067
NC_058537.1_cds_YP_010188430.1_65	0.2372	0.48715
NC_058537.1_cds_YP_010188431.1_66	0.2344	0.347
NC_058537.1_cds_YP_010188433.1_68	0.2623	0.33795
NC_058537.1_cds_YP_010188434.1_69	0.302	0.379
NC_058537.1_cds_YP_010188436.1_71	0.2647	0.36275
NC_058537.1_cds_YP_010188437.1_72	0.2316	0.3955
NC_058537.1_cds_YP_010188438.1_73	0.2229	0.38855
NC_058537.1_cds_YP_010188439.1_74	0.206	0.3942
NC_058537.1_cds_YP_010188440.1_75	0.2563	0.4353
NC_058537.1_cds_YP_010188442.1_77	0.2477	0.30655
NC_058537.1_cds_YP_010188443.1_78	0.2372	0.48715
NC_058537.1_cds_YP_010188444.1_79	0.3185	0.4067
NC_058537.1_cds_YP_010188445.1_80	0.3646	0.37945
NC_058537.1_cds_YP_010188447.1_82	0.3164	0.49815
NC_058538.1_cds_YP_010188448.1_1	0.3226	0.50405
NC_058538.1_cds_YP_010188449.1_2	0.3136	0.4661
NC_058538.1_cds_YP_010188450.1_3	0.2867	0.328
NC_058538.1_cds_YP_010188451.1_4	0.3004	0.5063
NC_058538.1_cds_YP_010188452.1_5	0.2846	0.48895
NC_058538.1_cds_YP_010188453.1_6	0.2836	0.4291
NC_058538.1_cds_YP_010188454.1_7	0.2479	0.39665
NC_058538.1_cds_YP_010188455.1_8	0.271	0.4463
NC_058538.1_cds_YP_010188456.1_9	0.283	0.43085
NC_058538.1_cds_YP_010188457.1_10	0.2525	0.43815
NC_058538.1_cds_YP_010188458.1_11	0.3018	0.43195
NC_058538.1_cds_YP_010188459.1_12	0.3222	0.4754
NC_058538.1_cds_YP_010188460.1_13	0.3061	0.4599
NC_058538.1_cds_YP_010188461.1_14	0.2574	0.4455
NC_058538.1_cds_YP_010188463.1_16	0.3122	0.49685
NC_058538.1_cds_YP_010188464.1_17	0.3192	0.476
NC_058538.1_cds_YP_010188467.1_20	0.2848	0.43465
NC_058538.1_cds_YP_010188468.1_21	0.2504	0.43195
NC_058538.1_cds_YP_010188469.1_22	0.2606	0.38555
NC_058538.1_cds_YP_010188470.1_23	0.2785	0.4093
NC_058538.1_cds_YP_010188471.1_24	0.2419	0.41735
NC_058538.1_cds_YP_010188473.1_26	0.3152	0.3886
NC_058538.1_cds_YP_010188474.1_27	0.2849	0.4735
NC_058538.1_cds_YP_010188478.1_31	0.2869	0.3685
NC_058538.1_cds_YP_010188480.1_33	0.3281	0.40365
NC_058538.1_cds_YP_010188481.1_34	0.3261	0.33695
NC_058538.1_cds_YP_010188482.1_35	0.2991	0.4486
NC_058538.1_cds_YP_010188491.1_44	0.2455	0.37725
NC_058538.1_cds_YP_010188492.1_45	0.25	0.3625
NC_058538.1_cds_YP_010188493.1_46	0.3226	0.50405
NC_058538.1_cds_YP_010188494.1_47	0.2944	0.47465
NC_058538.1_cds_YP_010188495.1_48	0.3026	0.5079
NC_058538.1_cds_YP_010188499.1_52	0.3056	0.44215
NC_058538.1_cds_YP_010188500.1_53	0.2174	0.4472
NC_058538.1_cds_YP_010188501.1_54	0.25	0.372
NC_058538.1_cds_YP_010188502.1_55	0.2518	0.536
NC_058538.1_cds_YP_010188504.1_57	0.2741	0.3889
NC_058538.1_cds_YP_010188505.1_58	0.2846	0.43905
NC_058538.1_cds_YP_010188506.1_59	0.2868	0.52205
NC_058538.1_cds_YP_010188507.1_60	0.2146	0.3813
NC_058538.1_cds_YP_010188509.1_62	0.3164	0.49815
NC_058538.1_cds_YP_010188511.1_64	0.3649	0.3793
NC_058538.1_cds_YP_010188512.1_65	0.3185	0.4067
NC_058538.1_cds_YP_010188513.1_66	0.2372	0.4904
NC_058538.1_cds_YP_010188514.1_67	0.2311	0.34725
NC_058538.1_cds_YP_010188516.1_69	0.2593	0.3318
NC_058538.1_cds_YP_010188517.1_70	0.302	0.377
NC_058538.1_cds_YP_010188519.1_72	0.2647	0.36275
NC_058538.1_cds_YP_010188520.1_73	0.2429	0.3983
NC_058538.1_cds_YP_010188521.1_74	0.2229	0.39155
NC_058538.1_cds_YP_010188522.1_75	0.2033	0.39285
NC_058538.1_cds_YP_010188523.1_76	0.2513	0.43275
NC_058538.1_cds_YP_010188525.1_78	0.2422	0.3056
NC_058538.1_cds_YP_010188526.1_79	0.2372	0.4904
NC_058538.1_cds_YP_010188527.1_80	0.3185	0.4067
NC_058538.1_cds_YP_010188528.1_81	0.3649	0.3793
NC_058538.1_cds_YP_010188530.1_83	0.3164	0.49815
NC_058539.1_cds_YP_010228099.1_1	0.3226	0.50405
NC_058539.1_cds_YP_010228100.1_2	0.3164	0.4661
NC_058539.1_cds_YP_010228101.1_3	0.2785	0.33655
NC_058539.1_cds_YP_010228102.1_4	0.2941	0.50735
NC_058539.1_cds_YP_010228103.1_5	0.2886	0.49095
NC_058539.1_cds_YP_010228104.1_6	0.2836	0.4366
NC_058539.1_cds_YP_010228105.1_7	0.2562	0.39665
NC_058539.1_cds_YP_010228106.1_8	0.2664	0.4486
NC_058539.1_cds_YP_010228107.1_9	0.2767	0.43085
NC_058539.1_cds_YP_010228108.1_10	0.2475	0.43815
NC_058539.1_cds_YP_010228109.1_11	0.3077	0.43195
NC_058539.1_cds_YP_010228110.1_12	0.3222	0.4754
NC_058539.1_cds_YP_010228111.1_13	0.302	0.4592
NC_058539.1_cds_YP_010228112.1_14	0.2574	0.4455
NC_058539.1_cds_YP_010228114.1_16	0.3122	0.49685
NC_058539.1_cds_YP_010228115.1_17	0.322	0.476
NC_058539.1_cds_YP_010228118.1_20	0.2885	0.4356
NC_058539.1_cds_YP_010228119.1_21	0.2518	0.43415
NC_058539.1_cds_YP_010228120.1_22	0.2592	0.3859
NC_058539.1_cds_YP_010228121.1_23	0.2869	0.4072
NC_058539.1_cds_YP_010228122.1_24	0.254	0.4153
NC_058539.1_cds_YP_010228124.1_26	0.3152	0.38585
NC_058539.1_cds_YP_010228125.1_27	0.2798	0.47455
NC_058539.1_cds_YP_010228129.1_31	0.2888	0.3685
NC_058539.1_cds_YP_010228131.1_33	0.3281	0.40365
NC_058539.1_cds_YP_010228132.1_34	0.3261	0.34135
NC_058539.1_cds_YP_010228133.1_35	0.296	0.44705
NC_058539.1_cds_YP_010228142.1_44	0.2636	0.37725
NC_058539.1_cds_YP_010228143.1_45	0.2583	0.3625
NC_058539.1_cds_YP_010228144.1_46	0.3226	0.50405
NC_058539.1_cds_YP_010228145.1_47	0.3046	0.47465
NC_058539.1_cds_YP_010228146.1_48	0.3026	0.5098
NC_058539.1_cds_YP_010228150.1_52	0.2963	0.44215
NC_058539.1_cds_YP_010228151.1_53	0.2174	0.4472
NC_058539.1_cds_YP_010228152.1_54	0.25	0.375
NC_058539.1_cds_YP_010228153.1_55	0.259	0.536
NC_058539.1_cds_YP_010228155.1_57	0.2741	0.3852
NC_058539.1_cds_YP_010228156.1_58	0.2683	0.43905
NC_058539.1_cds_YP_010228157.1_59	0.2868	0.5147
NC_058539.1_cds_YP_010228158.1_60	0.2146	0.3881
NC_058539.1_cds_YP_010228160.1_62	0.3164	0.49815
NC_058539.1_cds_YP_010228162.1_64	0.3646	0.3792
NC_058539.1_cds_YP_010228163.1_65	0.3185	0.4077
NC_058539.1_cds_YP_010228164.1_66	0.2372	0.4904
NC_058539.1_cds_YP_010228165.1_67	0.2325	0.34685
NC_058539.1_cds_YP_010228167.1_69	0.2585	0.32925
NC_058539.1_cds_YP_010228168.1_70	0.306	0.38
NC_058539.1_cds_YP_010228170.1_72	0.2843	0.36275
NC_058539.1_cds_YP_010228171.1_73	0.2373	0.4011
NC_058539.1_cds_YP_010228172.1_74	0.2229	0.39155
NC_058539.1_cds_YP_010228173.1_75	0.206	0.39285
NC_058539.1_cds_YP_010228174.1_76	0.2538	0.434
NC_058539.1_cds_YP_010228176.1_78	0.2496	0.30465
NC_058539.1_cds_YP_010228177.1_79	0.2372	0.4904
NC_058539.1_cds_YP_010228178.1_80	0.3185	0.4077
NC_058539.1_cds_YP_010228179.1_81	0.3646	0.3792
NC_058539.1_cds_YP_010228181.1_83	0.3164	0.49815
NC_062094.1_cds_YP_010326411.1_1	0.3226	0.50405
NC_062094.1_cds_YP_010326412.1_2	0.3164	0.4661
NC_062094.1_cds_YP_010326413.1_3	0.2913	0.328
NC_062094.1_cds_YP_010326414.1_4	0.2983	0.50525
NC_062094.1_cds_YP_010326415.1_5	0.2906	0.49095
NC_062094.1_cds_YP_010326416.1_6	0.291	0.43655
NC_062094.1_cds_YP_010326417.1_7	0.2562	0.39665
NC_062094.1_cds_YP_010326418.1_8	0.2757	0.4486
NC_062094.1_cds_YP_010326419.1_9	0.2704	0.43085
NC_062094.1_cds_YP_010326420.1_10	0.2475	0.43565
NC_062094.1_cds_YP_010326421.1_11	0.3018	0.429
NC_062094.1_cds_YP_010326422.1_12	0.3209	0.4754
NC_062094.1_cds_YP_010326423.1_13	0.3048	0.4592
NC_062094.1_cds_YP_010326424.1_14	0.2574	0.4455
NC_062094.1_cds_YP_010326426.1_16	0.3143	0.4947
NC_062094.1_cds_YP_010326427.1_17	0.3164	0.476
NC_062094.1_cds_YP_010326430.1_20	0.2848	0.4356
NC_062094.1_cds_YP_010326431.1_21	0.2529	0.432
NC_062094.1_cds_YP_010326432.1_22	0.2603	0.3832
NC_062094.1_cds_YP_010326433.1_23	0.2785	0.40505
NC_062094.1_cds_YP_010326434.1_24	0.2419	0.41735
NC_062094.1_cds_YP_010326436.1_26	0.3069	0.39415
NC_062094.1_cds_YP_010326437.1_27	0.2857	0.47455
NC_062094.1_cds_YP_010326441.1_31	0.2908	0.3695
NC_062094.1_cds_YP_010326443.1_33	0.3281	0.40365
NC_062094.1_cds_YP_010326444.1_34	0.3348	0.337
NC_062094.1_cds_YP_010326445.1_35	0.2991	0.4486
NC_062094.1_cds_YP_010326454.1_44	0.2692	0.3846
NC_062094.1_cds_YP_010326455.1_45	0.2667	0.3625
NC_062094.1_cds_YP_010326456.1_46	0.3226	0.50405
NC_062094.1_cds_YP_010326457.1_47	0.2995	0.47465
NC_062094.1_cds_YP_010326458.1_48	0.3124	0.5079
NC_062094.1_cds_YP_010326462.1_52	0.3102	0.44215
NC_062094.1_cds_YP_010326463.1_53	0.2236	0.4472
NC_062094.1_cds_YP_010326464.1_54	0.2508	0.37
NC_062094.1_cds_YP_010326465.1_55	0.2662	0.536
NC_062094.1_cds_YP_010326467.1_57	0.2741	0.3852
NC_062094.1_cds_YP_010326468.1_58	0.2927	0.43905
NC_062094.1_cds_YP_010326469.1_59	0.2993	0.51095
NC_062094.1_cds_YP_010326470.1_60	0.2146	0.38585
NC_062094.1_cds_YP_010326472.1_62	0.32	0.49815
NC_062094.1_cds_YP_010326474.1_64	0.3646	0.37985
NC_062094.1_cds_YP_010326475.1_65	0.3185	0.4067
NC_062094.1_cds_YP_010326476.1_66	0.2372	0.4904
NC_062094.1_cds_YP_010326477.1_67	0.2264	0.35285
NC_062094.1_cds_YP_010326479.1_69	0.2685	0.3349
NC_062094.1_cds_YP_010326480.1_70	0.31	0.381
NC_062094.1_cds_YP_010326482.1_72	0.2647	0.36275
NC_062094.1_cds_YP_010326483.1_73	0.2373	0.4011
NC_062094.1_cds_YP_010326484.1_74	0.2289	0.39155
NC_062094.1_cds_YP_010326485.1_75	0.2033	0.39285
NC_062094.1_cds_YP_010326486.1_76	0.2563	0.43275
NC_062094.1_cds_YP_010326488.1_78	0.248	0.3058
NC_062094.1_cds_YP_010326489.1_79	0.2372	0.4904
NC_062094.1_cds_YP_010326490.1_80	0.3185	0.4067
NC_062094.1_cds_YP_010326491.1_81	0.3646	0.37985
NC_062094.1_cds_YP_010326493.1_83	0.32	0.49815
NC_062095.1_cds_YP_010326494.1_1	0.3226	0.5
NC_062095.1_cds_YP_010326495.1_2	0.3051	0.4647
NC_062095.1_cds_YP_010326496.1_3	0.2752	0.32755
NC_062095.1_cds_YP_010326497.1_4	0.2983	0.50525
NC_062095.1_cds_YP_010326498.1_5	0.2906	0.48995
NC_062095.1_cds_YP_010326499.1_6	0.291	0.444
NC_062095.1_cds_YP_010326500.1_7	0.2479	0.39255
NC_062095.1_cds_YP_010326501.1_8	0.2757	0.4486
NC_062095.1_cds_YP_010326502.1_9	0.2956	0.434
NC_062095.1_cds_YP_010326503.1_10	0.2426	0.43565
NC_062095.1_cds_YP_010326504.1_11	0.2959	0.43195
NC_062095.1_cds_YP_010326505.1_12	0.3262	0.4754
NC_062095.1_cds_YP_010326506.1_13	0.3048	0.4592
NC_062095.1_cds_YP_010326507.1_14	0.2673	0.45045
NC_062095.1_cds_YP_010326509.1_16	0.3165	0.49685
NC_062095.1_cds_YP_010326510.1_17	0.3107	0.476
NC_062095.1_cds_YP_010326513.1_20	0.2894	0.4337
NC_062095.1_cds_YP_010326514.1_21	0.2518	0.43115
NC_062095.1_cds_YP_010326515.1_22	0.2617	0.38355
NC_062095.1_cds_YP_010326516.1_23	0.2743	0.4072
NC_062095.1_cds_YP_010326517.1_24	0.254	0.41735
NC_062095.1_cds_YP_010326519.1_26	0.3069	0.39415
NC_062095.1_cds_YP_010326520.1_27	0.2798	0.4736
NC_062095.1_cds_YP_010326524.1_31	0.2908	0.36955
NC_062095.1_cds_YP_010326526.1_33	0.3229	0.40365
NC_062095.1_cds_YP_010326527.1_34	0.313	0.33695
NC_062095.1_cds_YP_010326528.1_35	0.3053	0.45015
NC_062095.1_cds_YP_010326537.1_44	0.25	0.3846
NC_062095.1_cds_YP_010326538.1_45	0.25	0.3625
NC_062095.1_cds_YP_010326539.1_46	0.3226	0.5
NC_062095.1_cds_YP_010326540.1_47	0.2944	0.47465
NC_062095.1_cds_YP_010326541.1_48	0.3045	0.50885
NC_062095.1_cds_YP_010326545.1_52	0.3009	0.44215
NC_062095.1_cds_YP_010326546.1_53	0.2174	0.4472
NC_062095.1_cds_YP_010326547.1_54	0.256	0.3735
NC_062095.1_cds_YP_010326548.1_55	0.2374	0.5396
NC_062095.1_cds_YP_010326550.1_57	0.2667	0.3889
NC_062095.1_cds_YP_010326551.1_58	0.2846	0.43905
NC_062095.1_cds_YP_010326552.1_59	0.2993	0.51095
NC_062095.1_cds_YP_010326553.1_60	0.21	0.3881
NC_062095.1_cds_YP_010326555.1_62	0.3139	0.49635
NC_062095.1_cds_YP_010326557.1_64	0.3641	0.3792
NC_062095.1_cds_YP_010326558.1_65	0.3205	0.4067
NC_062095.1_cds_YP_010326559.1_66	0.2372	0.48715
NC_062095.1_cds_YP_010326560.1_67	0.4805	0.48375
NC_062095.1_cds_YP_010326561.1_68	0.2394	0.37625
NC_062095.1_cds_YP_010326563.1_70	0.2562	0.33025
NC_062095.1_cds_YP_010326564.1_71	0.308	0.379
NC_062095.1_cds_YP_010326566.1_73	0.2451	0.36275
NC_062095.1_cds_YP_010326567.1_74	0.2373	0.3983
NC_062095.1_cds_YP_010326568.1_75	0.241	0.39155
NC_062095.1_cds_YP_010326569.1_76	0.206	0.3901
NC_062095.1_cds_YP_010326570.1_77	0.2487	0.43525
NC_062095.1_cds_YP_010326572.1_79	0.254	0.306
NC_062095.1_cds_YP_010326573.1_80	0.4805	0.48375
NC_062095.1_cds_YP_010326574.1_81	0.2372	0.48715
NC_062095.1_cds_YP_010326575.1_82	0.3205	0.4067
NC_062095.1_cds_YP_010326576.1_83	0.3641	0.3792
NC_062095.1_cds_YP_010326578.1_85	0.3139	0.49635
NC_062096.1_cds_YP_010326579.1_1	0.3226	0.5
NC_062096.1_cds_YP_010326580.1_2	0.322	0.4661
NC_062096.1_cds_YP_010326581.1_3	0.281	0.33335
NC_062096.1_cds_YP_010326582.1_4	0.3004	0.5042
NC_062096.1_cds_YP_010326583.1_5	0.2846	0.48895
NC_062096.1_cds_YP_010326584.1_6	0.2985	0.43285
NC_062096.1_cds_YP_010326585.1_7	0.2479	0.4008
NC_062096.1_cds_YP_010326586.1_8	0.2757	0.4486
NC_062096.1_cds_YP_010326587.1_9	0.2893	0.434
NC_062096.1_cds_YP_010326588.1_10	0.2475	0.43815
NC_062096.1_cds_YP_010326589.1_11	0.2959	0.429
NC_062096.1_cds_YP_010326590.1_12	0.3222	0.4754
NC_062096.1_cds_YP_010326591.1_13	0.3034	0.4585
NC_062096.1_cds_YP_010326592.1_14	0.2475	0.45045
NC_062096.1_cds_YP_010326594.1_16	0.3122	0.49685
NC_062096.1_cds_YP_010326595.1_17	0.3079	0.476
NC_062096.1_cds_YP_010326598.1_20	0.2894	0.43605
NC_062096.1_cds_YP_010326599.1_21	0.2569	0.43325
NC_062096.1_cds_YP_010326600.1_22	0.2612	0.38565
NC_062096.1_cds_YP_010326601.1_23	0.27	0.4072
NC_062096.1_cds_YP_010326602.1_24	0.246	0.4153
NC_062096.1_cds_YP_010326604.1_26	0.3016	0.39415
NC_062096.1_cds_YP_010326605.1_27	0.2779	0.47455
NC_062096.1_cds_YP_010326609.1_31	0.2849	0.3695
NC_062096.1_cds_YP_010326611.1_33	0.3351	0.4135
NC_062096.1_cds_YP_010326612.1_34	0.3217	0.33695
NC_062096.1_cds_YP_010326613.1_35	0.3022	0.4486
NC_062096.1_cds_YP_010326622.1_44	0.2348	0.3739
NC_062096.1_cds_YP_010326623.1_45	0.25	0.3625
NC_062096.1_cds_YP_010326624.1_46	0.3226	0.5
NC_062096.1_cds_YP_010326625.1_47	0.2995	0.47465
NC_062096.1_cds_YP_010326626.1_48	0.2986	0.50785
NC_062096.1_cds_YP_010326630.1_52	0.3056	0.44215
NC_062096.1_cds_YP_010326631.1_53	0.2174	0.4472
NC_062096.1_cds_YP_010326632.1_54	0.244	0.3735
NC_062096.1_cds_YP_010326633.1_55	0.2662	0.5324
NC_062096.1_cds_YP_010326635.1_57	0.2593	0.3889
NC_062096.1_cds_YP_010326636.1_58	0.2764	0.43905
NC_062096.1_cds_YP_010326637.1_59	0.292	0.51095
NC_062096.1_cds_YP_010326638.1_60	0.21	0.3813
NC_062096.1_cds_YP_010326640.1_62	0.3139	0.49635
NC_062096.1_cds_YP_010326642.1_64	0.3641	0.379
NC_062096.1_cds_YP_010326643.1_65	0.3205	0.4067
NC_062096.1_cds_YP_010326644.1_66	0.2436	0.4904
NC_062096.1_cds_YP_010326645.1_67	0.2296	0.347
NC_062096.1_cds_YP_010326647.1_69	0.2638	0.33435
NC_062096.1_cds_YP_010326648.1_70	0.306	0.38
NC_062096.1_cds_YP_010326650.1_72	0.2647	0.36275
NC_062096.1_cds_YP_010326651.1_73	0.2316	0.3955
NC_062096.1_cds_YP_010326652.1_74	0.2169	0.39155
NC_062096.1_cds_YP_010326653.1_75	0.2115	0.397
NC_062096.1_cds_YP_010326654.1_76	0.2538	0.4302
NC_062096.1_cds_YP_010326656.1_78	0.247	0.306
NC_062096.1_cds_YP_010326657.1_79	0.2436	0.4904
NC_062096.1_cds_YP_010326658.1_80	0.3205	0.4067
NC_062096.1_cds_YP_010326659.1_81	0.3641	0.379
NC_062096.1_cds_YP_010326661.1_83	0.3139	0.49635
NC_062097.1_cds_YP_010326662.1_1	0.3226	0.5
NC_062097.1_cds_YP_010326663.1_2	0.3079	0.4647
NC_062097.1_cds_YP_010326664.1_3	0.2791	0.3304
NC_062097.1_cds_YP_010326665.1_4	0.2983	0.50525
NC_062097.1_cds_YP_010326666.1_5	0.2926	0.48995
NC_062097.1_cds_YP_010326667.1_6	0.291	0.444
NC_062097.1_cds_YP_010326668.1_7	0.2479	0.39255
NC_062097.1_cds_YP_010326669.1_8	0.271	0.4486
NC_062097.1_cds_YP_010326670.1_9	0.2893	0.434
NC_062097.1_cds_YP_010326671.1_10	0.2376	0.43565
NC_062097.1_cds_YP_010326672.1_11	0.2959	0.43195
NC_062097.1_cds_YP_010326673.1_12	0.3249	0.4754
NC_062097.1_cds_YP_010326674.1_13	0.3034	0.4592
NC_062097.1_cds_YP_010326675.1_14	0.2673	0.45045
NC_062097.1_cds_YP_010326677.1_16	0.3186	0.4979
NC_062097.1_cds_YP_010326678.1_17	0.3107	0.476
NC_062097.1_cds_YP_010326681.1_20	0.2894	0.43415
NC_062097.1_cds_YP_010326682.1_21	0.2533	0.4319
NC_062097.1_cds_YP_010326683.1_22	0.2617	0.3832
NC_062097.1_cds_YP_010326684.1_23	0.2743	0.4072
NC_062097.1_cds_YP_010326685.1_24	0.25	0.41735
NC_062097.1_cds_YP_010326687.1_26	0.3069	0.39415
NC_062097.1_cds_YP_010326688.1_27	0.2798	0.47455
NC_062097.1_cds_YP_010326692.1_31	0.2908	0.3695
NC_062097.1_cds_YP_010326694.1_33	0.3229	0.40365
NC_062097.1_cds_YP_010326695.1_34	0.313	0.33915
NC_062097.1_cds_YP_010326696.1_35	0.3053	0.4486
NC_062097.1_cds_YP_010326705.1_44	0.2596	0.3846
NC_062097.1_cds_YP_010326706.1_45	0.25	0.3625
NC_062097.1_cds_YP_010326707.1_46	0.3226	0.5
NC_062097.1_cds_YP_010326708.1_47	0.2944	0.47465
NC_062097.1_cds_YP_010326709.1_48	0.3045	0.50885
NC_062097.1_cds_YP_010326713.1_52	0.3056	0.44215
NC_062097.1_cds_YP_010326714.1_53	0.2174	0.4472
NC_062097.1_cds_YP_010326715.1_54	0.256	0.3735
NC_062097.1_cds_YP_010326716.1_55	0.2374	0.5396
NC_062097.1_cds_YP_010326718.1_57	0.2667	0.3815
NC_062097.1_cds_YP_010326719.1_58	0.2764	0.43905
NC_062097.1_cds_YP_010326720.1_59	0.2993	0.51095
NC_062097.1_cds_YP_010326721.1_60	0.21	0.38355
NC_062097.1_cds_YP_010326723.1_62	0.3139	0.49635
NC_062097.1_cds_YP_010326725.1_64	0.3637	0.3792
NC_062097.1_cds_YP_010326726.1_65	0.3205	0.4067
NC_062097.1_cds_YP_010326727.1_66	0.2372	0.48715
NC_062097.1_cds_YP_010326728.1_67	0.4805	0.48375
NC_062097.1_cds_YP_010326729.1_68	0.2265	0.351
NC_062097.1_cds_YP_010326731.1_70	0.2593	0.33025
NC_062097.1_cds_YP_010326732.1_71	0.31	0.379
NC_062097.1_cds_YP_010326734.1_73	0.2549	0.36275
NC_062097.1_cds_YP_010326735.1_74	0.2316	0.3983
NC_062097.1_cds_YP_010326736.1_75	0.2349	0.39155
NC_062097.1_cds_YP_010326737.1_76	0.206	0.3901
NC_062097.1_cds_YP_010326738.1_77	0.2462	0.434
NC_062097.1_cds_YP_010326740.1_79	0.2503	0.30675
NC_062097.1_cds_YP_010326741.1_80	0.4805	0.48375
NC_062097.1_cds_YP_010326742.1_81	0.2372	0.48715
NC_062097.1_cds_YP_010326743.1_82	0.3205	0.4067
NC_062097.1_cds_YP_010326744.1_83	0.3637	0.3792
NC_062097.1_cds_YP_010326746.1_85	0.3139	0.49635
NC_062098.1_cds_YP_010326747.1_1	0.3226	0.5
NC_062098.1_cds_YP_010326748.1_2	0.3164	0.4661
NC_062098.1_cds_YP_010326749.1_3	0.2791	0.32945
NC_062098.1_cds_YP_010326750.1_4	0.3004	0.5042
NC_062098.1_cds_YP_010326751.1_5	0.2906	0.48795
NC_062098.1_cds_YP_010326752.1_6	0.291	0.4366
NC_062098.1_cds_YP_010326753.1_7	0.2562	0.4008
NC_062098.1_cds_YP_010326754.1_8	0.271	0.4486
NC_062098.1_cds_YP_010326755.1_9	0.283	0.434
NC_062098.1_cds_YP_010326756.1_10	0.2475	0.43815
NC_062098.1_cds_YP_010326757.1_11	0.2959	0.429
NC_062098.1_cds_YP_010326758.1_12	0.3196	0.4754
NC_062098.1_cds_YP_010326759.1_13	0.3048	0.4592
NC_062098.1_cds_YP_010326760.1_14	0.2475	0.45045
NC_062098.1_cds_YP_010326762.1_16	0.3143	0.4958
NC_062098.1_cds_YP_010326763.1_17	0.322	0.476
NC_062098.1_cds_YP_010326766.1_20	0.2894	0.43605
NC_062098.1_cds_YP_010326767.1_21	0.2489	0.433
NC_062098.1_cds_YP_010326768.1_22	0.256	0.38465
NC_062098.1_cds_YP_010326769.1_23	0.2616	0.4093
NC_062098.1_cds_YP_010326770.1_24	0.254	0.41735
NC_062098.1_cds_YP_010326772.1_26	0.291	0.3968
NC_062098.1_cds_YP_010326773.1_27	0.2779	0.4736
NC_062098.1_cds_YP_010326777.1_31	0.2809	0.3715
NC_062098.1_cds_YP_010326779.1_33	0.3297	0.4135
NC_062098.1_cds_YP_010326780.1_34	0.3174	0.33915
NC_062098.1_cds_YP_010326781.1_35	0.3022	0.45015
NC_062098.1_cds_YP_010326790.1_44	0.2545	0.37725
NC_062098.1_cds_YP_010326791.1_45	0.2333	0.3625
NC_062098.1_cds_YP_010326792.1_46	0.3226	0.5
NC_062098.1_cds_YP_010326793.1_47	0.2995	0.47465
NC_062098.1_cds_YP_010326794.1_48	0.2986	0.5079
NC_062098.1_cds_YP_010326798.1_52	0.2917	0.44215
NC_062098.1_cds_YP_010326799.1_53	0.2174	0.4503
NC_062098.1_cds_YP_010326800.1_54	0.2432	0.3754
NC_062098.1_cds_YP_010326801.1_55	0.2595	0.53055
NC_062098.1_cds_YP_010326803.1_57	0.2667	0.3889
NC_062098.1_cds_YP_010326804.1_58	0.2927	0.43905
NC_062098.1_cds_YP_010326805.1_59	0.292	0.51455
NC_062098.1_cds_YP_010326806.1_60	0.2146	0.38125
NC_062098.1_cds_YP_010326808.1_62	0.3139	0.49635
NC_062098.1_cds_YP_010326810.1_64	0.3641	0.3792
NC_062098.1_cds_YP_010326811.1_65	0.3185	0.4067
NC_062098.1_cds_YP_010326812.1_66	0.2436	0.4904
NC_062098.1_cds_YP_010326813.1_67	0.2373	0.34865
NC_062098.1_cds_YP_010326815.1_69	0.2546	0.33435
NC_062098.1_cds_YP_010326816.1_70	0.302	0.38
NC_062098.1_cds_YP_010326818.1_72	0.2647	0.36275
NC_062098.1_cds_YP_010326819.1_73	0.2316	0.39265
NC_062098.1_cds_YP_010326820.1_74	0.2229	0.39155
NC_062098.1_cds_YP_010326821.1_75	0.2088	0.3942
NC_062098.1_cds_YP_010326822.1_76	0.2513	0.43275
NC_062098.1_cds_YP_010326824.1_78	0.2486	0.3052
NC_062098.1_cds_YP_010326825.1_79	0.2436	0.4904
NC_062098.1_cds_YP_010326826.1_80	0.3185	0.4067
NC_062098.1_cds_YP_010326827.1_81	0.3641	0.3792
NC_062098.1_cds_YP_010326829.1_83	0.3139	0.49635
NC_063303.1_cds_YP_010374461.1_1	0.3226	0.50405
NC_063303.1_cds_YP_010374462.1_2	0.3136	0.4661
NC_063303.1_cds_YP_010374463.1_3	0.2824	0.33075
NC_063303.1_cds_YP_010374464.1_4	0.2962	0.50735
NC_063303.1_cds_YP_010374465.1_5	0.2846	0.48995
NC_063303.1_cds_YP_010374466.1_6	0.291	0.4366
NC_063303.1_cds_YP_010374467.1_7	0.2479	0.39665
NC_063303.1_cds_YP_010374468.1_8	0.271	0.4486
NC_063303.1_cds_YP_010374469.1_9	0.2893	0.43085
NC_063303.1_cds_YP_010374470.1_10	0.2426	0.43815
NC_063303.1_cds_YP_010374471.1_11	0.3018	0.43195
NC_063303.1_cds_YP_010374472.1_12	0.3236	0.4754
NC_063303.1_cds_YP_010374473.1_13	0.3007	0.4592
NC_063303.1_cds_YP_010374474.1_14	0.2574	0.44055
NC_063303.1_cds_YP_010374476.1_16	0.308	0.49685
NC_063303.1_cds_YP_010374477.1_17	0.3192	0.476
NC_063303.1_cds_YP_010374480.1_20	0.2857	0.4351
NC_063303.1_cds_YP_010374481.1_21	0.2504	0.4319
NC_063303.1_cds_YP_010374482.1_22	0.2598	0.38425
NC_063303.1_cds_YP_010374483.1_23	0.2785	0.4072
NC_063303.1_cds_YP_010374484.1_24	0.246	0.4153
NC_063303.1_cds_YP_010374486.1_26	0.3069	0.3915
NC_063303.1_cds_YP_010374487.1_27	0.274	0.47455
NC_063303.1_cds_YP_010374491.1_31	0.2888	0.3685
NC_063303.1_cds_YP_010374493.1_33	0.3281	0.40365
NC_063303.1_cds_YP_010374494.1_34	0.3304	0.33695
NC_063303.1_cds_YP_010374495.1_35	0.2928	0.45015
NC_063303.1_cds_YP_010374504.1_44	0.2261	0.37825
NC_063303.1_cds_YP_010374505.1_45	0.2583	0.3625
NC_063303.1_cds_YP_010374506.1_46	0.3226	0.50405
NC_063303.1_cds_YP_010374507.1_47	0.3046	0.47465
NC_063303.1_cds_YP_010374508.1_48	0.3065	0.50885
NC_063303.1_cds_YP_010374512.1_52	0.3009	0.44215
NC_063303.1_cds_YP_010374513.1_53	0.2174	0.4472
NC_063303.1_cds_YP_010374514.1_54	0.25	0.3705
NC_063303.1_cds_YP_010374515.1_55	0.2518	0.5396
NC_063303.1_cds_YP_010374517.1_57	0.2741	0.3852
NC_063303.1_cds_YP_010374518.1_58	0.2846	0.43905
NC_063303.1_cds_YP_010374519.1_59	0.2868	0.5147
NC_063303.1_cds_YP_010374520.1_60	0.2146	0.38355
NC_063303.1_cds_YP_010374522.1_62	0.3152	0.4982
NC_063303.1_cds_YP_010374524.1_64	0.365	0.37965
NC_063303.1_cds_YP_010374525.1_65	0.3185	0.4077
NC_063303.1_cds_YP_010374526.1_66	0.2372	0.4904
NC_063303.1_cds_YP_010374527.1_67	0.3526	0.33655
NC_063303.1_cds_YP_010374528.1_68	0.2288	0.34985
NC_063303.1_cds_YP_010374530.1_70	0.2593	0.3287
NC_063303.1_cds_YP_010374531.1_71	0.298	0.379
NC_063303.1_cds_YP_010374533.1_73	0.2843	0.36275
NC_063303.1_cds_YP_010374534.1_74	0.2316	0.4011
NC_063303.1_cds_YP_010374535.1_75	0.2289	0.39155
NC_063303.1_cds_YP_010374536.1_76	0.206	0.39425
NC_063303.1_cds_YP_010374537.1_77	0.2538	0.4353
NC_063303.1_cds_YP_010374539.1_79	0.2466	0.3067
NC_063303.1_cds_YP_010374540.1_80	0.2372	0.4904
NC_063303.1_cds_YP_010374541.1_81	0.3185	0.4077
NC_063303.1_cds_YP_010374542.1_82	0.365	0.37965
NC_063303.1_cds_YP_010374544.1_84	0.3152	0.4982
NC_063304.1_cds_YP_010374545.1_1	0.3226	0.5
NC_063304.1_cds_YP_010374546.1_2	0.3079	0.4647
NC_063304.1_cds_YP_010374547.1_3	0.2791	0.32945
NC_063304.1_cds_YP_010374548.1_4	0.3004	0.50525
NC_063304.1_cds_YP_010374549.1_5	0.2906	0.48895
NC_063304.1_cds_YP_010374550.1_6	0.291	0.444
NC_063304.1_cds_YP_010374551.1_7	0.2479	0.39255
NC_063304.1_cds_YP_010374552.1_8	0.2804	0.4486
NC_063304.1_cds_YP_010374553.1_9	0.2893	0.4371
NC_063304.1_cds_YP_010374554.1_10	0.2426	0.43565
NC_063304.1_cds_YP_010374555.1_11	0.2899	0.43195
NC_063304.1_cds_YP_010374556.1_12	0.3249	0.4754
NC_063304.1_cds_YP_010374557.1_13	0.3034	0.4592
NC_063304.1_cds_YP_010374558.1_14	0.2673	0.45045
NC_063304.1_cds_YP_010374560.1_16	0.3165	0.49685
NC_063304.1_cds_YP_010374561.1_17	0.3107	0.476
NC_063304.1_cds_YP_010374564.1_20	0.2894	0.4328
NC_063304.1_cds_YP_010374565.1_21	0.2533	0.43115
NC_063304.1_cds_YP_010374566.1_22	0.2616	0.3833
NC_063304.1_cds_YP_010374567.1_23	0.2743	0.4072
NC_063304.1_cds_YP_010374568.1_24	0.254	0.41735
NC_063304.1_cds_YP_010374570.1_26	0.3069	0.39415
NC_063304.1_cds_YP_010374571.1_27	0.2779	0.4736
NC_063304.1_cds_YP_010374575.1_31	0.2908	0.3675
NC_063304.1_cds_YP_010374577.1_33	0.3229	0.40365
NC_063304.1_cds_YP_010374578.1_34	0.313	0.33915
NC_063304.1_cds_YP_010374579.1_35	0.3053	0.45015
NC_063304.1_cds_YP_010374588.1_44	0.25	0.3846
NC_063304.1_cds_YP_010374589.1_45	0.25	0.3625
NC_063304.1_cds_YP_010374590.1_46	0.3226	0.5
NC_063304.1_cds_YP_010374591.1_47	0.2944	0.47465
NC_063304.1_cds_YP_010374592.1_48	0.3045	0.50885
NC_063304.1_cds_YP_010374596.1_52	0.3056	0.44215
NC_063304.1_cds_YP_010374597.1_53	0.2174	0.441
NC_063304.1_cds_YP_010374598.1_54	0.256	0.372
NC_063304.1_cds_YP_010374599.1_55	0.2374	0.5396
NC_063304.1_cds_YP_010374601.1_57	0.2667	0.3926
NC_063304.1_cds_YP_010374602.1_58	0.2846	0.43905
NC_063304.1_cds_YP_010374603.1_59	0.2941	0.5147
NC_063304.1_cds_YP_010374604.1_60	0.2146	0.38585
NC_063304.1_cds_YP_010374606.1_62	0.3152	0.4982
NC_063304.1_cds_YP_010374608.1_64	0.3632	0.3792
NC_063304.1_cds_YP_010374609.1_65	0.3205	0.4067
NC_063304.1_cds_YP_010374610.1_66	0.2372	0.48715
NC_063304.1_cds_YP_010374611.1_67	0.3567	0.34075
NC_063304.1_cds_YP_010374612.1_68	0.228	0.35135
NC_063304.1_cds_YP_010374614.1_70	0.2593	0.3287
NC_063304.1_cds_YP_010374615.1_71	0.312	0.378
NC_063304.1_cds_YP_010374617.1_73	0.2549	0.36275
NC_063304.1_cds_YP_010374618.1_74	0.2373	0.3983
NC_063304.1_cds_YP_010374619.1_75	0.2349	0.39155
NC_063304.1_cds_YP_010374620.1_76	0.206	0.3901
NC_063304.1_cds_YP_010374621.1_77	0.2487	0.4353
NC_063304.1_cds_YP_010374623.1_79	0.2534	0.30685
NC_063304.1_cds_YP_010374624.1_80	0.2372	0.48715
NC_063304.1_cds_YP_010374625.1_81	0.3205	0.4067
NC_063304.1_cds_YP_010374626.1_82	0.3632	0.3792
NC_063304.1_cds_YP_010374628.1_84	0.3152	0.4982
