# Supplementary material for: Comparative Analysis of Codon Usage Patterns in Nuclear and Chloroplast Genome of Dalbergia (Fabaceae)
Source: Genes (Basel). 2023 May 19;14(5):1110. doi: 10.3390/genes14051110 (PMC10217945; doi:10.3390/genes14051110)
Supplement: Supplementary file 1 [file genes-14-01110-s001.zip › Supplementary Excel S7.xlsx]

## Sheet: Sheet1
Amino acid	Codon	High		Low		△RSCU
		Number	RSCU	Number	RSCU
Phe	UUU	4571	0.91	6291	1.03	-0.12
	UUC	5425	1.09	5972	0.97	0.12
Leu	UUA	2297	0.57	3112	0.7	-0.13
	UUG*	4915	1.22	5494	1.24	-0.02
	CUU*	4764	1.18	6140	1.39	-0.21
	CUC*	5982	1.49	4919	1.11	0.38
	CUA	2425	0.6	2938	0.66	-0.06
	CUG	3769	0.94	3915	0.89	0.05
Ile	AUU*	3614	1.14	5115	1.25	-0.11
	AUC*	3929	1.23	4269	1.05	0.18
	AUA	2008	0.63	2865	0.7	-0.07
Met	AUG	4569	1	5000	1	0
Val	GUU*	4483	1.32	5156	1.41	-0.09
	GUC	3047	0.9	3244	0.89	0.01
	GUA	1609	0.48	2279	0.62	-0.14
	GUG*	4409	1.3	3937	1.08	0.22
Ser	UCU*	4562	1.12	5604	1.17	-0.05
	UCC*	5396	1.32	4908	1.02	0.3
	UCA*	4870	1.19	5844	1.22	-0.03
	UCG	2544	0.62	2865	0.6	0.02
Pro	CCU*	5580	1.2	4615	1.15	0.05
	CCC	4403	0.94	3570	0.89	0.05
	CCA*	5300	1.14	5126	1.28	-0.14
	CCG	3356	0.72	2672	0.67	0.05
Thr	ACU	2922	0.91	3940	1.13	-0.22
	ACC*	4443	1.39	3642	1.04	0.35
	ACA*	3521	1.1	4415	1.26	-0.16
	ACG	1938	0.6	2008	0.57	0.03
Ala	GCU*	4745	1.19	5362	1.29	-0.1
	GCC	4369	1.09	3881	0.93	0.16
	GCA*	4215	1.05	5035	1.21	-0.16
	GCG	2669	0.67	2372	0.57	0.1
Tyr	UAU*	2612	1.12	4087	1.17	-0.05
	UAC	2059	0.88	2889	0.83	0.05
TER	UAA	2477	0.7	3963	0.76	-0.06
	UAG	1941	0.55	2730	0.52	0.03
His	CAU	4634	1	6198	1.15	-0.15
	CAC	4626	1	4617	0.85	0.15
Gln	CAA	6595	1.23	8582	1.29	-0.06
	CAG	4103	0.77	4687	0.71	0.06
Asn	AAU*	4097	1.02	5666	1.12	-0.1
	AAC	3908	0.98	4458	0.88	0.1
Lys	AAA	4749	0.89	6829	1.07	-0.18
	AAG	5963	1.11	5913	0.93	0.18
Asp	GAU*	5164	1.23	5751	1.25	-0.02
	GAC	3238	0.77	3478	0.75	0.02
Glu	GAA*	6953	1.07	8212	1.22	-0.15
	GAG	6007	0.93	5275	0.78	0.15
Cys	UGU	4359	0.96	6375	0.97	-0.01
	UGC*	4737	1.04	6836	1.03	0.01
TER	UGA*	6246	1.76	8923	1.71	0.05
Trp	UGG	6970	1	7967	1	0
Arg	CGU	2616	0.64	2959	0.71	-0.07
	CGC	4007	0.99	2925	0.7	0.29
	CGA	3449	0.85	3968	0.95	-0.1
	CGG	3353	0.83	2883	0.69	0.14
Ser	AGU	3040	0.75	4299	0.9	-0.15
	AGC	4063	1	5297	1.1	-0.1
Arg	AGA*	5451	1.34	7463	1.78	-0.44
	AGG*	5508	1.36	4925	1.18	0.18
Gly	GGU	5071	1	4843	0.92	0.08
	GGC	4685	0.92	4771	0.9	0.02
	GGA*	6566	1.29	7505	1.42	-0.13
	GGG	4039	0.79	3969	0.75	0.04
Note: *meanRSCU＞1，Bold mean△RSCU＞0.08，* and Bold meanRSCU＞1and△RSCU＞0.08
