# Supplementary material for: Comparative Analysis of Codon Usage Patterns in Nuclear and Chloroplast Genome of Dalbergia (Fabaceae)
Source: Genes (Basel). 2023 May 19;14(5):1110. doi: 10.3390/genes14051110 (PMC10217945; doi:10.3390/genes14051110)
Supplement: Supplementary file 1 [file genes-14-01110-s001.zip › Supplementary Excel S8.xlsx]

## Sheet: Statistics
Three levels of gene expression	ENC under 50		ENC over 50		t-statistic	p-value
	Sequence number	Mean RPKM	Sequence number	Mean RPKM
High	2482	83.34	6690	60.9	3.5113	0.0004519(p<0.001)
Medium	3037	4.1272	6822	4.4355	-5.5917	0.00000002348(p<0.001)
Low	1981	0.3514	3910	0.3591	-0.9879	0.3233(p>0.1)

## Sheet: High-level
Gene	ENC	RPKM
evm.model.scaffold_222.1834	61	3287.48
evm.model.scaffold_222.1830	61	3035.48
evm.model.scaffold_97.444	61	2315.63
evm.model.scaffold_176.80	61	1304.21
evm.model.scaffold_222.1832	61	1111.75
evm.model.scaffold_39.914	61	485.385
evm.model.scaffold_44.401	61	443.558
evm.model.scaffold_40.111	61	398.568
evm.model.scaffold_4.79	61	386.913
evm.model.scaffold_36.303	61	338.054
evm.model.scaffold_100.475	61	310.569
evm.model.scaffold_222.165	61	268.272
evm.model.scaffold_416.520	61	216.273
evm.model.scaffold_5.300	61	212.301
evm.model.scaffold_97.262	61	201.958
evm.model.scaffold_457.635	61	192.046
evm.model.scaffold_97.215	61	157.8
evm.model.scaffold_461.1229	61	156.176
evm.model.scaffold_300.162	61	150.654
evm.model.scaffold_100.802	61	138.441
evm.model.scaffold_40.719	61	126.615
evm.model.scaffold_46.475	61	112.904
evm.model.scaffold_222.661	61	111.331
evm.model.scaffold_40.1210	61	110.606
evm.model.scaffold_320.383	61	105.388
evm.model.scaffold_44.331	61	104.161
evm.model.scaffold_36.1121	61	96.617
evm.model.scaffold_375.519	61	88.832
evm.model.scaffold_5.803	61	86.513
evm.model.scaffold_28.370	61	86.331
evm.model.scaffold_60.15	61	85.692
evm.model.scaffold_40.881	61	81.456
evm.model.scaffold_28.741	61	80.319
evm.model.scaffold_5.1018.2	61	79.919
evm.model.scaffold_100.770	61	77.733
evm.model.scaffold_44.330	61	76.132
evm.model.scaffold_320.362	61	74.796
evm.model.scaffold_376.232	61	71.122
evm.model.scaffold_100.1339	61	70.878
evm.model.scaffold_69.492	61	70.404
evm.model.scaffold_36.96	61	70.399
evm.model.scaffold_264.30	61	69.402
evm.model.scaffold_461.494_evm.model.scaffold_461.495	61	69.059
evm.model.scaffold_9.141	61	66.836
evm.model.scaffold_28.1038	61	66.077
evm.model.scaffold_40.1583	61	65.564
evm.model.scaffold_186.5	61	62.842
evm.model.scaffold_36.171	61	61.952
evm.model.scaffold_28.647.1	61	61.889
evm.model.scaffold_39.8	61	58.86
evm.model.scaffold_56.98	61	57.973
evm.model.scaffold_290.422	61	57.069
evm.model.scaffold_416.7	61	56.111
evm.model.scaffold_160.25	61	54.134
evm.model.scaffold_61.37	61	54.042
evm.model.scaffold_21.21	61	53.49
evm.model.scaffold_192.2	61	53.484
evm.model.scaffold_233.35	61	52.221
evm.model.scaffold_5.1647	61	51.265
evm.model.scaffold_54.307	61	50.924
evm.model.scaffold_248.12	61	49.937
evm.model.scaffold_40.1085	61	49.554
evm.model.scaffold_100.1537	61	49.033
evm.model.scaffold_97.489	61	48.647
evm.model.scaffold_46.390	61	48.586
evm.model.scaffold_41.14	61	48.18
evm.model.scaffold_100.653.1	61	46.989
evm.model.scaffold_36.582	61	46.608
evm.model.scaffold_206.670	61	45.352
evm.model.scaffold_419.219	61	44.017
evm.model.scaffold_12.276	61	43.924
evm.model.scaffold_97.812	61	43.68
evm.model.scaffold_36.332	61	40.928
evm.model.scaffold_36.1047	61	40.336
evm.model.scaffold_233.159	61	40.289
evm.model.scaffold_461.709	61	38.751
evm.model.scaffold_290.608	61	38.711
evm.model.scaffold_416.372	61	37.282
evm.model.scaffold_222.1107	61	37.132
evm.model.scaffold_5.963.1	61	36.88
evm.model.scaffold_36.560	61	36.25
evm.model.scaffold_461.281	61	36.051
evm.model.scaffold_290.340	61	35.36
evm.model.scaffold_5.736	61	35.176
evm.model.scaffold_100.1335	61	35.007
evm.model.scaffold_416.28	61	33.744
evm.model.scaffold_313.3	61	32.73
evm.model.scaffold_222.1682	61	32.042
evm.model.scaffold_360.41	61	32.04
evm.model.scaffold_100.777	61	30.314
evm.model.scaffold_35.1000	61	30.145
evm.model.scaffold_35.659	61	29.991
evm.model.scaffold_176.178	61	29.092
evm.model.scaffold_378.97	61	28.383
evm.model.scaffold_30.15	61	28.135
evm.model.scaffold_28.148	61	27.95
evm.model.scaffold_416.771	61	27.64
evm.model.scaffold_100.1084	61	27.543
evm.model.scaffold_9.100	61	25.7
evm.model.scaffold_46.896	61	25.36
evm.model.scaffold_5.1305	61	25.33
evm.model.scaffold_97.497	61	24.466
evm.model.scaffold_222.1089	61	24.339
evm.model.scaffold_461.285	61	23.779
evm.model.scaffold_5.544	61	23.673
evm.model.scaffold_28.172	61	23.643
evm.model.scaffold_18.226	61	23.058
evm.model.scaffold_209.9	61	23.019
evm.model.scaffold_36.175	61	22.797
evm.model.scaffold_205.54	61	22.741
evm.model.scaffold_375.157	61	20.918
evm.model.scaffold_36.889	61	20.198
evm.model.scaffold_378.231	61	19.917
evm.model.scaffold_97.730	61	19.843
evm.model.scaffold_4.73	61	19.666
evm.model.scaffold_62.108	61	19.446
evm.model.scaffold_113.98	61	19.37
evm.model.scaffold_457.490	61	19.13
evm.model.scaffold_222.675	61	18.945
evm.model.scaffold_100.145	61	18.877
evm.model.scaffold_162.249	61	18.277
evm.model.scaffold_206.636	61	17.599
evm.model.scaffold_100.1778	61	17.113
evm.model.scaffold_28.157.1	61	16.53
evm.model.scaffold_233.22	61	15.085
evm.model.scaffold_100.1835	61	14.988
evm.model.scaffold_100.138	61	14.972
evm.model.scaffold_36.598	61	14.954
evm.model.scaffold_100.1414	61	14.894
evm.model.scaffold_222.909	61	14.599
evm.model.scaffold_185.322	61	14.275
evm.model.scaffold_233.156	61	14.224
evm.model.scaffold_264.20	61	14.215
evm.model.scaffold_46.147	61	13.792
evm.model.scaffold_100.591	61	13.319
evm.model.scaffold_56.100	61	12.943
evm.model.scaffold_457.166	61	12.94
evm.model.scaffold_248.36_evm.model.scaffold_248.37	61	12.808
evm.model.scaffold_5.1206	61	12.689
evm.model.scaffold_100.1191	61	12.568
evm.model.scaffold_5.214_evm.model.scaffold_5.215	61	12.488
evm.model.scaffold_97.698	61	11.947
evm.model.scaffold_378.59	61	11.775
evm.model.scaffold_28.754	61	11.61
evm.model.scaffold_111.110	61	11.258
evm.model.scaffold_142.636	61	11.117
evm.model.scaffold_46.888	61	11.056
evm.model.scaffold_100.1493	61	10.873
evm.model.scaffold_48.289	61	10.69
evm.model.scaffold_206.665.1	61	10.651
evm.model.scaffold_394.385	61	10.612
evm.model.scaffold_100.1062	61	10.445
evm.model.scaffold_176.76	61	10.292
evm.model.scaffold_40.371	61	10.18
evm.model.scaffold_97.721	60.98	217.209
evm.model.scaffold_264.219	60.98	14.683
evm.model.scaffold_40.1518	60.97	33.998
evm.model.scaffold_5.1735	60.95	97.994
evm.model.scaffold_25.183.1	60.94	18.091
evm.model.scaffold_375.36	60.93	35.996
evm.model.scaffold_375.617	60.92	46.999
evm.model.scaffold_18.202	60.9	61.346
evm.model.scaffold_28.413	60.9	12.875
evm.model.scaffold_160.7	60.88	35.276
evm.model.scaffold_416.860	60.87	53.625
evm.model.scaffold_222.763	60.87	20.643
evm.model.scaffold_40.108	60.86	20.343
evm.model.scaffold_97.635	60.84	49.412
evm.model.scaffold_100.78	60.83	30.163
evm.model.scaffold_233.220	60.82	30.089
evm.model.scaffold_394.5	60.82	11.169
evm.model.scaffold_35.633	60.78	198.451
evm.model.scaffold_69.452	60.78	33.531
evm.model.scaffold_222.609	60.77	19.683
evm.model.scaffold_35.150	60.76	52.101
evm.model.scaffold_29.716	60.74	188.693
evm.model.scaffold_222.11	60.72	11.659
evm.model.scaffold_28.782	60.72	11.122
evm.model.scaffold_208.7	60.7	21.35
evm.model.scaffold_5.545	60.65	34.099
evm.model.scaffold_100.1238	60.64	12.576
evm.model.scaffold_241.244	60.63	10.703
evm.model.scaffold_5.1309	60.62	170.788
evm.model.scaffold_273.367	60.61	40.094
evm.model.scaffold_28.507	60.55	17.231
evm.model.scaffold_40.1569	60.55	15.049
evm.model.scaffold_36.1200	60.53	495.831
evm.model.scaffold_45.7	60.53	31.873
evm.model.scaffold_23.25.1	60.52	84.389
evm.model.scaffold_273.236	60.51	32.99
evm.model.scaffold_29.478	60.5	41.534
evm.model.scaffold_29.572	60.5	41.513
evm.model.scaffold_100.814	60.5	12.022
evm.model.scaffold_222.1096	60.49	51.729
evm.model.scaffold_69.54	60.46	80.119
evm.model.scaffold_168.45	60.46	34.437
evm.model.scaffold_307.280	60.44	17.486
evm.model.scaffold_307.102	60.44	12.134
evm.model.scaffold_113.104	60.43	88.689
evm.model.scaffold_222.712	60.42	187.94
evm.model.scaffold_35.3	60.42	110.394
evm.model.scaffold_233.246	60.42	25.198
evm.model.scaffold_320.522	60.42	19.385
evm.model.scaffold_35.194	60.41	144.226
evm.model.scaffold_97.566	60.4	54.338
evm.model.scaffold_113.92	60.39	32.32
evm.model.scaffold_28.217	60.39	30.484
evm.model.scaffold_142.600	60.39	14.018
evm.model.scaffold_39.334	60.38	17.584
evm.model.scaffold_340.69	60.35	32.324
evm.model.scaffold_340.39	60.35	15.805
evm.model.scaffold_461.140	60.34	117.763
evm.model.scaffold_42.38	60.33	10.628
evm.model.scaffold_28.608	60.32	14.678
evm.model.scaffold_12.314	60.3	51.31
evm.model.scaffold_100.504	60.3	10.379
evm.model.scaffold_39.583	60.29	16.209
evm.model.scaffold_227.38	60.27	31.021
evm.model.scaffold_97.474.2	60.26	12.41
evm.model.scaffold_3.66	60.25	12.218
evm.model.scaffold_46.415	60.25	10.533
evm.model.scaffold_248.8	60.24	26.603
evm.model.scaffold_248.106	60.24	13.891
evm.model.scaffold_274.64	60.23	17.649
evm.model.scaffold_307.184	60.19	23.912
evm.model.scaffold_264.22	60.19	15.462
evm.model.scaffold_36.563	60.18	28.316
evm.model.scaffold_31.77	60.17	840.892
evm.model.scaffold_394.165	60.17	27.223
evm.model.scaffold_416.548	60.17	11.566
evm.model.scaffold_97.857	60.16	86.255
evm.model.scaffold_264.213	60.16	58.843
evm.model.scaffold_457.116.1	60.16	35.194
evm.model.scaffold_457.21	60.13	13.152
evm.model.scaffold_100.702	60.11	93.265
evm.model.scaffold_176.186	60.1	55.23
evm.model.scaffold_145.47	60.1	13.574
evm.model.scaffold_5.1534	60.09	169.903
evm.model.scaffold_290.471	60.09	28.483
evm.model.scaffold_100.573	60.08	152.336
evm.model.scaffold_375.601	60.08	85.327
evm.model.scaffold_28.680	60.08	32.477
evm.model.scaffold_396.165_evm.model.scaffold_396.166	60.08	15.781
evm.model.scaffold_28.531	60.08	15.694
evm.model.scaffold_28.376	60.08	13.294
evm.model.scaffold_222.1521	60.06	46.657
evm.model.scaffold_222.9	60.06	32.195
evm.model.scaffold_222.1119	60.04	53.741
evm.model.scaffold_4.97	60.02	96.204
evm.model.scaffold_28.806	60.02	34.163
evm.model.scaffold_46.215	60.01	19.621
evm.model.scaffold_35.1170	60	3789.21
evm.model.scaffold_375.730	60	32.387
evm.model.scaffold_40.1419	59.99	76.861
evm.model.scaffold_46.416	59.99	44.014
evm.model.scaffold_40.1013	59.98	47.768
evm.model.scaffold_461.646	59.97	14.066
evm.model.scaffold_233.100	59.96	113.904
evm.model.scaffold_145.22	59.96	15.636
evm.model.scaffold_97.426	59.94	223.627
evm.model.scaffold_28.993	59.94	51.776
evm.model.scaffold_100.1696	59.94	28.401
evm.model.scaffold_100.1079	59.93	17.708
evm.model.scaffold_142.105	59.92	91.701
evm.model.scaffold_28.1063	59.91	22.66
evm.model.scaffold_222.443	59.9	12.981
evm.model.scaffold_457.115	59.89	59.093
evm.model.scaffold_300.16	59.89	44.519
evm.model.scaffold_46.217	59.89	11.595
evm.model.scaffold_317.6	59.88	21.417
evm.model.scaffold_46.414	59.87	20.397
evm.model.scaffold_233.267	59.87	10.253
evm.model.scaffold_40.1296	59.86	1622.04
evm.model.scaffold_46.522	59.86	159.145
evm.model.scaffold_100.1240	59.86	77.406
evm.model.scaffold_307.185	59.85	13.122
evm.model.scaffold_222.1000	59.84	25.588
evm.model.scaffold_222.115	59.84	24.471
evm.model.scaffold_28.419	59.84	10.937
evm.model.scaffold_39.905	59.83	28.644
evm.model.scaffold_100.520	59.83	12.328
evm.model.scaffold_142.323	59.82	58.772
evm.model.scaffold_5.1929	59.81	56.339
evm.model.scaffold_248.453	59.81	26.376
evm.model.scaffold_333.26	59.8	13.6
evm.model.scaffold_206.586	59.8	12.928
evm.model.scaffold_46.487	59.79	19.533
evm.model.scaffold_28.740	59.79	19.149
evm.model.scaffold_97.859	59.78	41.312
evm.model.scaffold_461.599	59.77	52.778
evm.model.scaffold_100.1124.3	59.77	51.577
evm.model.scaffold_28.450	59.77	37.738
evm.model.scaffold_36.992	59.76	450.952
evm.model.scaffold_130.7	59.75	11.637
evm.model.scaffold_35.425	59.73	48.049
evm.model.scaffold_5.1066	59.73	35.306
evm.model.scaffold_113.2	59.73	33.235
evm.model.scaffold_215.5	59.73	30.12
evm.model.scaffold_222.148	59.71	17.862
evm.model.scaffold_113.36	59.7	29.663
evm.model.scaffold_29.378	59.68	80
evm.model.scaffold_186.6	59.67	67.976
evm.model.scaffold_172.67	59.66	36.332
evm.model.scaffold_396.170	59.66	25.569
evm.model.scaffold_320.173	59.66	10.956
evm.model.scaffold_273.32	59.66	10.291
evm.model.scaffold_5.1818	59.65	1085.12
evm.model.scaffold_206.671	59.65	40
evm.model.scaffold_36.688	59.63	19.407
evm.model.scaffold_309.31	59.63	11.956
evm.model.scaffold_35.1090	59.62	15.366
evm.model.scaffold_100.1149	59.61	35.91
evm.model.scaffold_29.673	59.6	305.826
evm.model.scaffold_9.47	59.6	67.541
evm.model.scaffold_40.1617	59.59	19.771
evm.model.scaffold_39.403	59.59	11.732
evm.model.scaffold_307.227	59.57	55.704
evm.model.scaffold_36.511	59.56	14.254
evm.model.scaffold_5.1878	59.56	11.057
evm.model.scaffold_222.440	59.55	2060.72
evm.model.scaffold_222.1022	59.54	786.206
evm.model.scaffold_176.77	59.53	1305.81
evm.model.scaffold_375.190	59.53	100.117
evm.model.scaffold_417.103	59.53	20.226
evm.model.scaffold_413.149	59.53	16.043
evm.model.scaffold_46.637	59.52	77.657
evm.model.scaffold_320.521	59.52	26.582
evm.model.scaffold_29.440	59.52	19.699
evm.model.scaffold_185.308	59.51	16.492
evm.model.scaffold_427.189.1	59.51	10.307
evm.model.scaffold_320.196	59.5	123.206
evm.model.scaffold_7.138	59.49	16.975
evm.model.scaffold_35.220	59.47	31.783
evm.model.scaffold_29.358	59.47	28.9
evm.model.scaffold_100.119	59.47	26.942
evm.model.scaffold_40.919	59.46	18.631
evm.model.scaffold_39.289	59.46	14.361
evm.model.scaffold_36.1172	59.45	21.532
evm.model.scaffold_111.37.1	59.44	49.766
evm.model.scaffold_28.981	59.43	43.349
evm.model.scaffold_36.170	59.43	27.229
evm.model.scaffold_100.1539	59.43	24.652
evm.model.scaffold_189.14	59.42	74.78
evm.model.scaffold_37.131	59.42	62.719
evm.model.scaffold_100.318	59.42	19.976
evm.model.scaffold_378.84	59.42	18.473
evm.model.scaffold_5.812	59.42	17.805
evm.model.scaffold_5.808	59.41	80.077
evm.model.scaffold_248.65	59.41	72.093
evm.model.scaffold_5.1699	59.41	15.128
evm.model.scaffold_56.9	59.41	11.385
evm.model.scaffold_5.118	59.4	22.861
evm.model.scaffold_40.977	59.4	21.392
evm.model.scaffold_461.105	59.4	13.241
evm.model.scaffold_241.228	59.38	11.407
evm.model.scaffold_69.108	59.36	41.489
evm.model.scaffold_100.1188	59.36	22.727
evm.model.scaffold_384.253	59.35	17.323
evm.model.scaffold_416.1014	59.34	54.121
evm.model.scaffold_100.19	59.34	44.221
evm.model.scaffold_100.466	59.34	19.233
evm.model.scaffold_34.34	59.34	11.512
evm.model.scaffold_40.479	59.33	77.654
evm.model.scaffold_206.334	59.33	68.948
evm.model.scaffold_320.333	59.31	48.928
evm.model.scaffold_100.73	59.31	18.556
evm.model.scaffold_97.364	59.29	21.667
evm.model.scaffold_461.801	59.29	13.96
evm.model.scaffold_320.208	59.28	36.844
evm.model.scaffold_44.504	59.28	34.399
evm.model.scaffold_424.8	59.28	17.093
evm.model.scaffold_44.373	59.27	63.461
evm.model.scaffold_375.387.1	59.27	41.133
evm.model.scaffold_56.41	59.26	31.754
evm.model.scaffold_142.160	59.25	45.459
evm.model.scaffold_461.31	59.25	13.501
evm.model.scaffold_142.31	59.24	72.705
evm.model.scaffold_394.40	59.22	33.186
evm.model.scaffold_28.487	59.2	14.468
evm.model.scaffold_100.1504	59.18	26.27
evm.model.scaffold_100.383	59.18	20.223
evm.model.scaffold_111.132	59.16	13.72
evm.model.scaffold_375.279	59.16	11.283
evm.model.scaffold_33.7	59.14	888.087
evm.model.scaffold_222.722	59.14	24.29
evm.model.scaffold_222.931	59.14	14.774
evm.model.scaffold_113.73	59.13	31.053
evm.model.scaffold_40.1566	59.13	11.259
evm.model.scaffold_62.139	59.12	50.694
evm.model.scaffold_36.212	59.12	21.954
evm.model.scaffold_28.1115	59.11	32.339
evm.model.scaffold_28.898	59.11	16.895
evm.model.scaffold_28.461	59.1	85.551
evm.model.scaffold_384.47	59.1	17.903
evm.model.scaffold_300.277	59.1	14.639
evm.model.scaffold_457.481	59.09	16.659
evm.model.scaffold_206.669	59.08	24.673
evm.model.scaffold_69.275	59.08	23.889
evm.model.scaffold_100.1827	59.07	17.887
evm.model.scaffold_172.4	59.06	25.698
evm.model.scaffold_39.938	59.04	97.818
evm.model.scaffold_378.26	59.03	12.669
evm.model.scaffold_46.897	59.01	233.863
evm.model.scaffold_100.1154	59.01	173.686
evm.model.scaffold_457.98	59.01	39.228
evm.model.scaffold_376.66	59.01	21.635
evm.model.scaffold_400.40.1	59.01	13.479
evm.model.scaffold_31.10	59	19.915
evm.model.scaffold_427.169	58.99	308.598
evm.model.scaffold_69.67	58.98	43.96
evm.model.scaffold_42.177	58.98	16.484
evm.model.scaffold_36.450	58.97	32.281
evm.model.scaffold_457.242	58.97	17.739
evm.model.scaffold_320.398	58.96	62.45
evm.model.scaffold_100.637	58.96	60.018
evm.model.scaffold_222.1769	58.94	1017.92
evm.model.scaffold_400.62	58.94	45.359
evm.model.scaffold_142.161.1	58.94	44.181
evm.model.scaffold_461.778	58.94	36.796
evm.model.scaffold_46.790.1	58.93	749.136
evm.model.scaffold_5.32	58.93	299.423
evm.model.scaffold_176.79	58.92	3227.67
evm.model.scaffold_34.43.1	58.92	48.035
evm.model.scaffold_29.159	58.92	28.837
evm.model.scaffold_36.1147	58.92	22.247
evm.model.scaffold_233.8	58.91	1152.34
evm.model.scaffold_5.632	58.91	31.32
evm.model.scaffold_241.232	58.9	25.262
evm.model.scaffold_5.1379	58.89	186.785
evm.model.scaffold_25.100	58.89	10.98
evm.model.scaffold_375.258	58.88	22.601
evm.model.scaffold_185.461	58.87	15.547
evm.model.scaffold_36.1259	58.86	59.272
evm.model.scaffold_376.190	58.86	32.423
evm.model.scaffold_100.709	58.86	12.625
evm.model.scaffold_185.278	58.85	90.085
evm.model.scaffold_307.351	58.85	33.977
evm.model.scaffold_36.183	58.85	10.841
evm.model.scaffold_290.690	58.83	22.314
evm.model.scaffold_375.136	58.82	18.116
evm.model.scaffold_349.4	58.82	12.296
evm.model.scaffold_5.1904	58.81	29.197
evm.model.scaffold_35.958	58.81	26.727
evm.model.scaffold_5.379	58.8	72.505
evm.model.scaffold_100.1137	58.8	35.499
evm.model.scaffold_100.875_evm.model.scaffold_100.876	58.8	31.592
evm.model.scaffold_396.174	58.79	20.321
evm.model.scaffold_40.65	58.79	10.866
evm.model.scaffold_222.458.1	58.78	77.955
evm.model.scaffold_176.278	58.78	74.605
evm.model.scaffold_40.247	58.78	14.101
evm.model.scaffold_417.54	58.78	14.036
evm.model.scaffold_386.83.1	58.77	24.097
evm.model.scaffold_416.187	58.77	18.539
evm.model.scaffold_142.96	58.76	45.788
evm.model.scaffold_100.253	58.76	35.681
evm.model.scaffold_28.640	58.76	26.786
evm.model.scaffold_176.323.4	58.75	89.042
evm.model.scaffold_40.1298	58.74	377.998
evm.model.scaffold_176.151	58.74	12.793
evm.model.scaffold_36.993	58.73	32.559
evm.model.scaffold_44.491	58.73	16.094
evm.model.scaffold_28.161	58.72	45.516
evm.model.scaffold_471.134	58.7	14.457
evm.model.scaffold_400.34	58.69	48.614
evm.model.scaffold_142.30	58.69	43.851
evm.model.scaffold_97.162	58.69	23.342
evm.model.scaffold_394.502	58.69	21.033
evm.model.scaffold_35.33	58.69	20.203
evm.model.scaffold_222.1266	58.69	17.723
evm.model.scaffold_299.152	58.68	29.534
evm.model.scaffold_384.341	58.67	15.381
evm.model.scaffold_142.605	58.67	13.287
evm.model.scaffold_34.30	58.66	18.353
evm.model.scaffold_100.524	58.65	168.836
evm.model.scaffold_222.1409.1	58.64	27.651
evm.model.scaffold_5.42	58.64	17.765
evm.model.scaffold_307.148	58.63	20.047
evm.model.scaffold_34.62	58.61	16.347
evm.model.scaffold_376.84	58.6	15.469
evm.model.scaffold_202.33	58.59	20.572
evm.model.scaffold_100.609	58.59	18.188
evm.model.scaffold_69.213	58.57	60.388
evm.model.scaffold_320.670	58.57	41.377
evm.model.scaffold_5.493	58.57	38.769
evm.model.scaffold_46.915	58.57	17.793
evm.model.scaffold_241.309	58.56	108.999
evm.model.scaffold_273.82	58.55	25.07
evm.model.scaffold_185.303	58.54	47.006
evm.model.scaffold_97.697	58.54	33.015
evm.model.scaffold_137.4	58.54	20.222
evm.model.scaffold_248.45	58.53	55.422
evm.model.scaffold_185.110	58.53	27.522
evm.model.scaffold_162.113.4	58.53	22.259
evm.model.scaffold_40.450	58.53	16.067
evm.model.scaffold_5.1525	58.52	41.735
evm.model.scaffold_40.1205	58.52	13.078
evm.model.scaffold_424.78	58.51	39.451
evm.model.scaffold_222.1495	58.51	25.211
evm.model.scaffold_222.602	58.51	21.525
evm.model.scaffold_264.174	58.5	98.975
evm.model.scaffold_185.60	58.5	30.637
evm.model.scaffold_369.99	58.49	54.54
evm.model.scaffold_461.222	58.49	28.176
evm.model.scaffold_273.184	58.49	18.682
evm.model.scaffold_202.16	58.48	12.251
evm.model.scaffold_189.39	58.48	11.104
evm.model.scaffold_100.1106	58.46	49.43
evm.model.scaffold_264.90	58.46	32.623
evm.model.scaffold_28.912	58.46	15.932
evm.model.scaffold_29.107	58.45	27.743
evm.model.scaffold_248.256	58.45	25.291
evm.model.scaffold_69.305	58.45	23.836
evm.model.scaffold_18.201	58.45	15.068
evm.model.scaffold_189.88	58.45	14.082
evm.model.scaffold_40.625	58.44	23.921
evm.model.scaffold_427.108	58.44	17.795
evm.model.scaffold_40.426	58.43	16.717
evm.model.scaffold_60.56	58.43	11.555
evm.model.scaffold_222.392	58.42	24.088
evm.model.scaffold_100.1328	58.42	18.913
evm.model.scaffold_400.24	58.41	38.745
evm.model.scaffold_42.34	58.41	15.547
evm.model.scaffold_461.976	58.4	13.725
evm.model.scaffold_97.136	58.4	12.817
evm.model.scaffold_176.216	58.39	134.411
evm.model.scaffold_5.1931.1	58.39	82.552
evm.model.scaffold_100.1282	58.39	15.045
evm.model.scaffold_376.228	58.39	10.167
evm.model.scaffold_97.598	58.38	31.958
evm.model.scaffold_46.109	58.38	21.906
evm.model.scaffold_5.1665	58.37	70.004
evm.model.scaffold_36.814	58.36	44.758
evm.model.scaffold_222.399	58.36	15.165
evm.model.scaffold_181.56	58.35	130.005
evm.model.scaffold_176.74	58.35	22.479
evm.model.scaffold_375.707	58.34	36.461
evm.model.scaffold_36.294	58.34	33.786
evm.model.scaffold_396.329	58.34	20.128
evm.model.scaffold_290.303	58.34	14.913
evm.model.scaffold_42.502	58.33	46.161
evm.model.scaffold_186.7	58.33	30.546
evm.model.scaffold_320.461	58.32	28.163
evm.model.scaffold_31.118	58.31	672.478
evm.model.scaffold_69.373	58.31	85.457
evm.model.scaffold_185.94	58.31	12.13
evm.model.scaffold_5.1538	58.3	86.814
evm.model.scaffold_394.173	58.3	80.774
evm.model.scaffold_29.656	58.3	65.365
evm.model.scaffold_100.1333	58.3	38.199
evm.model.scaffold_263.289	58.29	18.182
evm.model.scaffold_264.61	58.27	31.27
evm.model.scaffold_36.136	58.27	13.511
evm.model.scaffold_142.467	58.27	12.729
evm.model.scaffold_18.256	58.27	11.693
evm.model.scaffold_416.183	58.26	20.492
evm.model.scaffold_307.98	58.26	10.376
evm.model.scaffold_35.8	58.25	17.901
evm.model.scaffold_28.66	58.24	41.087
evm.model.scaffold_185.301	58.24	32.282
evm.model.scaffold_54.75	58.24	10.971
evm.model.scaffold_14.171	58.23	191.372
evm.model.scaffold_233.34	58.23	70.963
evm.model.scaffold_307.35	58.23	28.117
evm.model.scaffold_320.601	58.23	22.132
evm.model.scaffold_233.136	58.21	57.585
evm.model.scaffold_394.490	58.21	49.711
evm.model.scaffold_299.22	58.21	16.269
evm.model.scaffold_290.573	58.21	12.51
evm.model.scaffold_100.206	58.2	57.006
evm.model.scaffold_416.50	58.2	30.255
evm.model.scaffold_290.644	58.2	23.915
evm.model.scaffold_222.171	58.2	10.027
evm.model.scaffold_394.563	58.19	69.156
evm.model.scaffold_264.39	58.19	56.654
evm.model.scaffold_461.490	58.19	49.939
evm.model.scaffold_46.82	58.19	23.612
evm.model.scaffold_5.1264	58.18	139.019
evm.model.scaffold_47.3	58.18	24.769
evm.model.scaffold_100.322	58.17	20.738
evm.model.scaffold_30.35	58.17	19.755
evm.model.scaffold_185.158	58.17	13.521
evm.model.scaffold_222.206	58.16	64.346
evm.model.scaffold_39.509	58.16	46.441
evm.model.scaffold_113.124	58.16	24.181
evm.model.scaffold_172.111	58.16	19.307
evm.model.scaffold_40.193	58.16	10.401
evm.model.scaffold_206.476	58.16	10.255
evm.model.scaffold_40.1124	58.15	13.205
evm.model.scaffold_273.155	58.14	27.74
evm.model.scaffold_416.102	58.14	16.42
evm.model.scaffold_145.15	58.13	33.912
evm.model.scaffold_461.700.1	58.13	32.581
evm.model.scaffold_100.1697	58.13	21.378
evm.model.scaffold_461.817	58.12	47.109
evm.model.scaffold_222.1054	58.12	33.741
evm.model.scaffold_205.224	58.11	273.517
evm.model.scaffold_100.830	58.11	16.622
evm.model.scaffold_100.1753	58.11	16.098
evm.model.scaffold_222.1240	58.1	146.682
evm.model.scaffold_54.128	58.1	29.372
evm.model.scaffold_100.465	58.09	53.931
evm.model.scaffold_424.7	58.09	36.524
evm.model.scaffold_375.431	58.08	65.631
evm.model.scaffold_222.954	58.08	20.868
evm.model.scaffold_5.164.1	58.07	17.91
evm.model.scaffold_461.109	58.07	15.457
evm.model.scaffold_206.718	58.07	14.481
evm.model.scaffold_36.715	58.07	10.693
evm.model.scaffold_202.50	58.06	199.351
evm.model.scaffold_142.286	58.05	65.192
evm.model.scaffold_97.92	58.05	62.811
evm.model.scaffold_36.1025	58.05	40.886
evm.model.scaffold_36.1180	58.05	35.177
evm.model.scaffold_39.268	58.05	20.69
evm.model.scaffold_461.1080	58.05	11.389
evm.model.scaffold_5.1079	58.05	10.456
evm.model.scaffold_100.557	58.04	15.378
evm.model.scaffold_100.497	58.03	13.717
evm.model.scaffold_39.219	58.03	12.162
evm.model.scaffold_394.185	58.02	201.135
evm.model.scaffold_416.838	58.02	102.453
evm.model.scaffold_273.281	58.02	68.099
evm.model.scaffold_44.474	58.02	52.511
evm.model.scaffold_39.620	58.02	17.344
evm.model.scaffold_386.163	58.02	17.215
evm.model.scaffold_31.64	58.02	13.415
evm.model.scaffold_222.855	58.01	96.744
evm.model.scaffold_100.1389	58.01	43.88
evm.model.scaffold_45.64	58.01	36.231
evm.model.scaffold_222.1840	58.01	31.68
evm.model.scaffold_206.558	58.01	22.712
evm.model.scaffold_416.984	58	59.975
evm.model.scaffold_375.531.1	57.99	288.149
evm.model.scaffold_461.659	57.99	61.167
evm.model.scaffold_29.479	57.99	23.855
evm.model.scaffold_416.475	57.99	23.095
evm.model.scaffold_42.218	57.99	19.148
evm.model.scaffold_60.25	57.99	15.743
evm.model.scaffold_386.31	57.99	13.408
evm.model.scaffold_241.168	57.98	82.851
evm.model.scaffold_36.910	57.98	38.76
evm.model.scaffold_378.106	57.98	12.996
evm.model.scaffold_273.75	57.97	66.402
evm.model.scaffold_12.149	57.97	14.832
evm.model.scaffold_233.13	57.96	75.648
evm.model.scaffold_185.316	57.96	62.151
evm.model.scaffold_172.24	57.96	46.547
evm.model.scaffold_206.776	57.96	29.788
evm.model.scaffold_222.1049	57.96	22.739
evm.model.scaffold_29.315	57.96	15.423
evm.model.scaffold_290.564	57.95	26.999
evm.model.scaffold_417.94	57.94	105.165
evm.model.scaffold_394.348	57.93	78.092
evm.model.scaffold_320.224	57.93	58.658
evm.model.scaffold_100.489	57.93	39.662
evm.model.scaffold_40.1453	57.93	28.43
evm.model.scaffold_35.591	57.93	17.699
evm.model.scaffold_40.342	57.93	11.607
evm.model.scaffold_40.149	57.92	152.978
evm.model.scaffold_185.340.1	57.92	75.121
evm.model.scaffold_206.173	57.92	13.522
evm.model.scaffold_100.741	57.92	12.378
evm.model.scaffold_461.1018	57.92	11.063
evm.model.scaffold_100.538	57.91	43.966
evm.model.scaffold_471.16	57.9	148.594
evm.model.scaffold_185.293	57.9	65.669
evm.model.scaffold_206.162	57.9	21.355
evm.model.scaffold_416.238	57.9	18.304
evm.model.scaffold_44.170	57.89	21.07
evm.model.scaffold_28.681	57.88	75.582
evm.model.scaffold_100.442	57.87	19.73
evm.model.scaffold_320.477	57.85	47.321
evm.model.scaffold_23.90	57.85	29.288
evm.model.scaffold_384.292	57.85	21.09
evm.model.scaffold_274.81	57.85	10.103
evm.model.scaffold_320.69	57.84	57.731
evm.model.scaffold_274.68.1	57.84	55.394
evm.model.scaffold_111.355	57.84	49.523
evm.model.scaffold_97.490	57.84	13.583
evm.model.scaffold_134.16	57.84	11.602
evm.model.scaffold_202.81	57.83	202.901
evm.model.scaffold_39.27	57.83	32.201
evm.model.scaffold_320.577	57.83	24.746
evm.model.scaffold_416.206	57.82	155.039
evm.model.scaffold_386.169	57.82	43.282
evm.model.scaffold_376.197	57.82	21.976
evm.model.scaffold_162.4	57.82	19.232
evm.model.scaffold_222.1491.1	57.82	14.187
evm.model.scaffold_97.445	57.81	2017.26
evm.model.scaffold_36.1077	57.81	43.47
evm.model.scaffold_69.11	57.81	31.54
evm.model.scaffold_42.440	57.81	19.387
evm.model.scaffold_384.185.1	57.81	17.455
evm.model.scaffold_457.139	57.81	12.277
evm.model.scaffold_28.658	57.81	10.051
evm.model.scaffold_307.225	57.8	276.865
evm.model.scaffold_56.92	57.8	28.326
evm.model.scaffold_191.3	57.8	21.509
evm.model.scaffold_36.1097	57.8	16.445
evm.model.scaffold_206.384	57.8	13.129
evm.model.scaffold_248.446	57.79	44.915
evm.model.scaffold_28.476	57.78	198.665
evm.model.scaffold_369.76	57.78	19.083
evm.model.scaffold_40.257	57.78	12.824
evm.model.scaffold_222.1120	57.77	53.908
evm.model.scaffold_222.266	57.77	31.497
evm.model.scaffold_100.1135	57.77	28.734
evm.model.scaffold_111.31	57.77	21.148
evm.model.scaffold_5.1682	57.77	10.341
evm.model.scaffold_162.100	57.76	65.302
evm.model.scaffold_142.243	57.76	38.564
evm.model.scaffold_335.30	57.76	22.451
evm.model.scaffold_222.174	57.76	19.151
evm.model.scaffold_100.1045	57.75	218.415
evm.model.scaffold_320.27	57.75	68.043
evm.model.scaffold_416.825	57.75	15.336
evm.model.scaffold_97.479	57.75	12.148
evm.model.scaffold_307.446	57.73	51.026
evm.model.scaffold_39.868	57.73	17.065
evm.model.scaffold_29.687	57.73	16.916
evm.model.scaffold_97.284	57.73	11.845
evm.model.scaffold_206.161	57.73	11.216
evm.model.scaffold_416.788	57.72	126.827
evm.model.scaffold_100.1374	57.72	45.119
evm.model.scaffold_62.86	57.72	15.964
evm.model.scaffold_206.737.1	57.72	14.447
evm.model.scaffold_36.1265	57.71	35.543
evm.model.scaffold_54.281	57.71	28.743
evm.model.scaffold_35.405	57.71	24.1
evm.model.scaffold_5.2076	57.71	14.82
evm.model.scaffold_7.122	57.71	11.756
evm.model.scaffold_36.702	57.7	39.056
evm.model.scaffold_5.334	57.7	27.932
evm.model.scaffold_40.1138.1	57.7	27.595
evm.model.scaffold_206.639	57.7	15.436
evm.model.scaffold_100.1619	57.7	10.464
evm.model.scaffold_46.511	57.69	123.585
evm.model.scaffold_36.1011	57.69	93.823
evm.model.scaffold_100.1452	57.69	24.758
evm.model.scaffold_185.28	57.68	48.94
evm.model.scaffold_417.25	57.68	11.313
evm.model.scaffold_300.170	57.67	54.397
evm.model.scaffold_233.252	57.66	152.73
evm.model.scaffold_335.53	57.66	89.319
evm.model.scaffold_44.287	57.66	27.036
evm.model.scaffold_461.1204	57.66	16.655
evm.model.scaffold_394.558	57.65	2105.94
evm.model.scaffold_427.150	57.65	46.028
evm.model.scaffold_461.1086	57.65	35.403
evm.model.scaffold_35.1046	57.65	26.158
evm.model.scaffold_35.902	57.65	18.403
evm.model.scaffold_206.258	57.65	10.993
evm.model.scaffold_320.314	57.64	163.576
evm.model.scaffold_36.1096	57.64	64.629
evm.model.scaffold_39.143	57.64	42.338
evm.model.scaffold_39.1053	57.64	24.318
evm.model.scaffold_5.251	57.64	23.421
evm.model.scaffold_350.154	57.64	13.87
evm.model.scaffold_461.251	57.64	10.96
evm.model.scaffold_37.37	57.63	2830.09
evm.model.scaffold_45.16	57.63	58.156
evm.model.scaffold_46.861	57.63	40.956
evm.model.scaffold_461.99	57.63	18.148
evm.model.scaffold_320.615	57.63	16.995
evm.model.scaffold_461.658	57.62	32.831
evm.model.scaffold_375.130	57.62	11.49
evm.model.scaffold_42.414	57.61	70.801
evm.model.scaffold_111.408	57.61	53.787
evm.model.scaffold_394.312	57.61	42.427
evm.model.scaffold_320.70	57.61	35.893
evm.model.scaffold_375.240	57.61	30.684
evm.model.scaffold_248.322	57.61	28.925
evm.model.scaffold_427.6	57.61	16.391
evm.model.scaffold_222.1248	57.61	16.284
evm.model.scaffold_416.118	57.61	11.102
evm.model.scaffold_6.5	57.61	10.874
evm.model.scaffold_427.168	57.6	248.823
evm.model.scaffold_206.753	57.6	151.695
evm.model.scaffold_307.141	57.6	38.448
evm.model.scaffold_5.1290	57.6	29.424
evm.model.scaffold_461.389	57.6	24.023
evm.model.scaffold_39.55	57.6	13.918
evm.model.scaffold_394.350	57.59	63.837
evm.model.scaffold_69.411	57.59	46.039
evm.model.scaffold_100.414.1	57.59	33.74
evm.model.scaffold_5.1152	57.59	19.423
evm.model.scaffold_274.72	57.59	16.284
evm.model.scaffold_222.360	57.58	25.767
evm.model.scaffold_222.851	57.58	16.172
evm.model.scaffold_206.143	57.58	13.01
evm.model.scaffold_290.583	57.58	12.203
evm.model.scaffold_320.193	57.58	10.579
evm.model.scaffold_40.1058	57.57	91.475
evm.model.scaffold_461.656	57.57	50.372
evm.model.scaffold_7.261	57.57	14.303
evm.model.scaffold_202.53	57.56	13.621
evm.model.scaffold_7.112	57.55	117.306
evm.model.scaffold_100.1046	57.55	109.267
evm.model.scaffold_222.1816	57.55	36.028
evm.model.scaffold_394.446	57.55	19.32
evm.model.scaffold_28.1108	57.55	10.429
evm.model.scaffold_142.188	57.54	23.112
evm.model.scaffold_100.688	57.54	22.012
evm.model.scaffold_97.232	57.54	20.911
evm.model.scaffold_5.867	57.54	14.549
evm.model.scaffold_222.259	57.53	38.893
evm.model.scaffold_196.26	57.53	24.291
evm.model.scaffold_320.152	57.53	18.77
evm.model.scaffold_54.77	57.53	17.525
evm.model.scaffold_7.329	57.53	14.3
evm.model.scaffold_40.528	57.52	53.169
evm.model.scaffold_40.1664	57.52	27.176
evm.model.scaffold_189.31	57.52	25.316
evm.model.scaffold_222.784	57.51	219.78
evm.model.scaffold_97.858	57.51	27.113
evm.model.scaffold_25.11	57.51	21.86
evm.model.scaffold_35.177	57.51	16.177
evm.model.scaffold_100.1118	57.5	86.929
evm.model.scaffold_320.186	57.5	63.119
evm.model.scaffold_39.416	57.49	94.953
evm.model.scaffold_5.763	57.49	43.108
evm.model.scaffold_62.80	57.49	10.549
evm.model.scaffold_145.61	57.49	10.319
evm.model.scaffold_9.24	57.48	35.746
evm.model.scaffold_248.69	57.48	10.336
evm.model.scaffold_42.117	57.47	115.661
evm.model.scaffold_40.1006	57.47	58.821
evm.model.scaffold_28.110	57.47	54.913
evm.model.scaffold_46.909	57.47	23.891
evm.model.scaffold_97.731	57.47	10.095
evm.model.scaffold_206.553	57.46	217.645
evm.model.scaffold_5.53	57.46	120.353
evm.model.scaffold_44.213	57.46	11.662
evm.model.scaffold_461.483.1	57.45	34.43
evm.model.scaffold_100.1454	57.45	27.356
evm.model.scaffold_42.205	57.45	23.14
evm.model.scaffold_28.415	57.45	20.453
evm.model.scaffold_376.6	57.45	16.277
evm.model.scaffold_36.856.1	57.45	11
evm.model.scaffold_248.174	57.44	46.875
evm.model.scaffold_369.105	57.44	33.443
evm.model.scaffold_320.616	57.44	27.797
evm.model.scaffold_142.425	57.44	25.093
evm.model.scaffold_18.159	57.43	156.136
evm.model.scaffold_307.272	57.43	49.723
evm.model.scaffold_100.480	57.43	33.33
evm.model.scaffold_416.619	57.42	160.69
evm.model.scaffold_39.35	57.42	28.9
evm.model.scaffold_28.360	57.42	25.709
evm.model.scaffold_461.113	57.42	17.293
evm.model.scaffold_248.110	57.42	14.546
evm.model.scaffold_222.1324	57.41	337.861
evm.model.scaffold_39.216	57.41	63.708
evm.model.scaffold_36.97	57.4	323.284
evm.model.scaffold_5.273	57.4	163.294
evm.model.scaffold_100.631	57.4	34.811
evm.model.scaffold_142.421	57.4	30.164
evm.model.scaffold_35.201	57.4	26.046
evm.model.scaffold_461.106	57.4	12.974
evm.model.scaffold_320.636	57.39	192.432
evm.model.scaffold_54.54	57.39	46.184
evm.model.scaffold_69.195	57.39	23.454
evm.model.scaffold_5.944	57.39	14.967
evm.model.scaffold_39.740	57.38	78.847
evm.model.scaffold_40.156	57.38	68.186
evm.model.scaffold_39.175	57.38	48.671
evm.model.scaffold_185.109	57.38	46.076
evm.model.scaffold_40.1574	57.38	32.113
evm.model.scaffold_248.434	57.37	71.591
evm.model.scaffold_5.97	57.37	36.747
evm.model.scaffold_231.20	57.37	22.451
evm.model.scaffold_206.750	57.37	12.882
evm.model.scaffold_14.48	57.36	137.522
evm.model.scaffold_394.20	57.36	75.435
evm.model.scaffold_417.62	57.36	33.644
evm.model.scaffold_222.1507	57.36	15.299
evm.model.scaffold_222.1193	57.35	51.53
evm.model.scaffold_206.139	57.35	43.848
evm.model.scaffold_28.815	57.34	55.752
evm.model.scaffold_320.575	57.34	20.972
evm.model.scaffold_185.334	57.34	17.328
evm.model.scaffold_39.385	57.34	11.573
evm.model.scaffold_61.51	57.33	20.225
evm.model.scaffold_320.43	57.33	18.544
evm.model.scaffold_7.232	57.33	15.945
evm.model.scaffold_375.16	57.33	14.934
evm.model.scaffold_100.1547.1	57.32	25.63
evm.model.scaffold_427.63	57.32	12.285
evm.model.scaffold_5.1272	57.31	15.462
evm.model.scaffold_376.261	57.31	14.538
evm.model.scaffold_307.354	57.3	96.529
evm.model.scaffold_9.189	57.3	51.871
evm.model.scaffold_100.116	57.3	48.447
evm.model.scaffold_142.57.1	57.3	28.719
evm.model.scaffold_40.1637	57.3	21.256
evm.model.scaffold_290.447_evm.model.scaffold_290.448	57.3	20.26
evm.model.scaffold_18.161	57.3	10.597
evm.model.scaffold_40.335	57.29	43.331
evm.model.scaffold_340.33	57.29	23.52
evm.model.scaffold_222.408	57.28	83.958
evm.model.scaffold_290.659	57.28	59.16
evm.model.scaffold_111.290	57.28	16.105
evm.model.scaffold_290.377	57.28	11.678
evm.model.scaffold_205.196	57.28	11.664
evm.model.scaffold_36.1162	57.27	4527.92
evm.model.scaffold_461.872	57.27	27.06
evm.model.scaffold_100.1904	57.27	14.126
evm.model.scaffold_48.239	57.27	10.257
evm.model.scaffold_222.1716	57.26	28.2
evm.model.scaffold_375.142	57.26	15.741
evm.model.scaffold_396.184	57.26	13.615
evm.model.scaffold_91.10	57.26	12.341
evm.model.scaffold_5.1321	57.25	12.617
evm.model.scaffold_69.408	57.24	89.975
evm.model.scaffold_396.161	57.24	83.326
evm.model.scaffold_40.1191_evm.model.scaffold_40.1192	57.24	48.716
evm.model.scaffold_46.583	57.24	21.564
evm.model.scaffold_5.2004	57.24	12.562
evm.model.scaffold_290.483	57.23	52.617
evm.model.scaffold_100.217	57.23	51.201
evm.model.scaffold_28.953.1	57.23	19.372
evm.model.scaffold_394.352	57.22	334.032
evm.model.scaffold_416.975	57.22	37.233
evm.model.scaffold_461.403	57.22	30.631
evm.model.scaffold_69.183	57.22	24.759
evm.model.scaffold_206.440	57.21	48.405
evm.model.scaffold_222.243	57.21	36.719
evm.model.scaffold_42.393	57.21	16.593
evm.model.scaffold_307.183	57.21	14.332
evm.model.scaffold_36.156	57.21	13.696
evm.model.scaffold_320.287	57.2	116.618
evm.model.scaffold_248.395	57.2	38.484
evm.model.scaffold_97.36	57.2	11.186
evm.model.scaffold_0.64	57.19	124.139
evm.model.scaffold_394.39	57.19	48.154
evm.model.scaffold_69.235	57.19	47.41
evm.model.scaffold_145.1	57.19	13.636
evm.model.scaffold_375.540	57.19	10.84
evm.model.scaffold_248.57	57.19	10.707
evm.model.scaffold_185.506	57.19	10.626
evm.model.scaffold_222.1808	57.18	278.818
evm.model.scaffold_222.714	57.18	70.028
evm.model.scaffold_394.11	57.18	49.021
evm.model.scaffold_320.307	57.18	47.768
evm.model.scaffold_263.197	57.18	29.222
evm.model.scaffold_28.57	57.18	28.815
evm.model.scaffold_290.517	57.18	22.589
evm.model.scaffold_419.122	57.18	19.516
evm.model.scaffold_100.330	57.17	215.905
evm.model.scaffold_100.547	57.17	114.314
evm.model.scaffold_54.232	57.17	51.957
evm.model.scaffold_36.93	57.17	34.312
evm.model.scaffold_233.270	57.17	16.675
evm.model.scaffold_113.65.3	57.17	10.504
evm.model.scaffold_5.682	57.16	105.482
evm.model.scaffold_100.293	57.16	77.48
evm.model.scaffold_40.1658	57.16	45.579
evm.model.scaffold_46.330	57.16	41.883
evm.model.scaffold_40.1100	57.16	30.393
evm.model.scaffold_5.159	57.15	218.046
evm.model.scaffold_36.1264	57.15	82.029
evm.model.scaffold_36.1133.1	57.14	73.673
evm.model.scaffold_100.126	57.14	55.959
evm.model.scaffold_248.95	57.14	26.527
evm.model.scaffold_233.151	57.14	23.034
evm.model.scaffold_46.676	57.14	11.042
evm.model.scaffold_205.173	57.13	38.474
evm.model.scaffold_461.331	57.12	50.112
evm.model.scaffold_222.305	57.12	21.029
evm.model.scaffold_222.342	57.12	17.541
evm.model.scaffold_36.530	57.11	54.152
evm.model.scaffold_320.302	57.11	46.924
evm.model.scaffold_62.39	57.11	40.034
evm.model.scaffold_36.88	57.11	30.416
evm.model.scaffold_457.727	57.11	17.875
evm.model.scaffold_400.76	57.11	15.076
evm.model.scaffold_263.264	57.1	594.843
evm.model.scaffold_100.1161	57.1	158.003
evm.model.scaffold_457.203	57.1	61.752
evm.model.scaffold_40.1073	57.1	15.394
evm.model.scaffold_461.800	57.1	11.253
evm.model.scaffold_36.811	57.09	43.936
evm.model.scaffold_206.37	57.09	21.442
evm.model.scaffold_39.650	57.09	16.436
evm.model.scaffold_5.476	57.09	12.803
evm.model.scaffold_416.998	57.09	11.83
evm.model.scaffold_320.552	57.08	72.976
evm.model.scaffold_416.80	57.08	30.713
evm.model.scaffold_222.149	57.08	28.466
evm.model.scaffold_36.261	57.07	150.231
evm.model.scaffold_39.597	57.07	32.95
evm.model.scaffold_100.367	57.07	30.241
evm.model.scaffold_375.598	57.07	10.444
evm.model.scaffold_28.1009	57.06	28.082
evm.model.scaffold_222.1644	57.06	21.801
evm.model.scaffold_416.629	57.06	21.13
evm.model.scaffold_142.231.2	57.06	20.825
evm.model.scaffold_290.324	57.06	19.643
evm.model.scaffold_202.117	57.05	53.061
evm.model.scaffold_28.643	57.05	18.987
evm.model.scaffold_39.10	57.04	47.655
evm.model.scaffold_300.306	57.04	24.322
evm.model.scaffold_248.119	57.04	22.706
evm.model.scaffold_100.191	57.04	12.12
evm.model.scaffold_28.203	57.03	101.646
evm.model.scaffold_40.873	57.03	58.26
evm.model.scaffold_416.394	57.03	26.094
evm.model.scaffold_299.118	57.03	17.681
evm.model.scaffold_340.42	57.03	15.882
evm.model.scaffold_31.63	57.02	49.038
evm.model.scaffold_263.126	57.02	19.521
evm.model.scaffold_222.1818	57.02	10.347
evm.model.scaffold_5.1225	57.02	10.344
evm.model.scaffold_375.332	57.01	32.668
evm.model.scaffold_427.74	57.01	23.842
evm.model.scaffold_36.573	57.01	12.69
evm.model.scaffold_386.144	57.01	10.515
evm.model.scaffold_396.190	57	48.373
evm.model.scaffold_113.1	56.99	37.235
evm.model.scaffold_320.194	56.99	31.918
evm.model.scaffold_222.31	56.99	25.126
evm.model.scaffold_263.18	56.99	11.684
evm.model.scaffold_162.102	56.98	83.943
evm.model.scaffold_28.1002	56.98	46.485
evm.model.scaffold_5.76	56.98	34.076
evm.model.scaffold_142.245	56.98	21.513
evm.model.scaffold_264.34	56.98	20.535
evm.model.scaffold_100.1438	56.98	16.531
evm.model.scaffold_222.904	56.98	13.084
evm.model.scaffold_248.176	56.97	108.643
evm.model.scaffold_51.119	56.97	38.75
evm.model.scaffold_100.872	56.97	31.317
evm.model.scaffold_222.327	56.97	16.194
evm.model.scaffold_394.288	56.96	27.972
evm.model.scaffold_39.937	56.95	106.547
evm.model.scaffold_413.143	56.95	30.212
evm.model.scaffold_375.746	56.95	10.148
evm.model.scaffold_300.172	56.95	10.047
evm.model.scaffold_46.708	56.94	89.118
evm.model.scaffold_5.492	56.94	28.106
evm.model.scaffold_100.1766	56.94	23.124
evm.model.scaffold_111.190	56.94	16.832
evm.model.scaffold_46.553	56.94	10.203
evm.model.scaffold_290.17	56.94	10.106
evm.model.scaffold_28.64	56.93	760.841
evm.model.scaffold_7.24	56.93	33.752
evm.model.scaffold_46.199	56.93	16.063
evm.model.scaffold_100.650	56.93	10.231
evm.model.scaffold_5.1448	56.93	10.001
evm.model.scaffold_37.39	56.92	3520.39
evm.model.scaffold_378.20	56.92	291.912
evm.model.scaffold_375.735	56.92	41.17
evm.model.scaffold_35.1072	56.92	26.84
evm.model.scaffold_233.168	56.92	20.473
evm.model.scaffold_206.579	56.91	110.675
evm.model.scaffold_396.25	56.91	86.003
evm.model.scaffold_375.73	56.91	37.06
evm.model.scaffold_46.84	56.91	34.644
evm.model.scaffold_36.142	56.9	52.091
evm.model.scaffold_222.418.2	56.9	39.341
evm.model.scaffold_300.258	56.9	29.195
evm.model.scaffold_5.291	56.9	28.798
evm.model.scaffold_185.496	56.9	19.285
evm.model.scaffold_61.22	56.89	189.873
evm.model.scaffold_145.64	56.89	61.844
evm.model.scaffold_248.515	56.89	55.005
evm.model.scaffold_189.98	56.89	29.903
evm.model.scaffold_17.10	56.89	22.825
evm.model.scaffold_40.1577	56.89	12.951
evm.model.scaffold_222.1214	56.88	99.178
evm.model.scaffold_17.42	56.88	12.644
evm.model.scaffold_376.168	56.88	10.46
evm.model.scaffold_36.558	56.87	63.571
evm.model.scaffold_461.379	56.87	55.434
evm.model.scaffold_97.802	56.87	53.414
evm.model.scaffold_44.344	56.87	32.558
evm.model.scaffold_222.1549	56.87	10.646
evm.model.scaffold_28.562	56.87	10.165
evm.model.scaffold_54.119	56.86	34.094
evm.model.scaffold_40.333	56.86	16.815
evm.model.scaffold_100.1277	56.86	14.562
evm.model.scaffold_14.1	56.86	10.442
evm.model.scaffold_427.207	56.85	33.53
evm.model.scaffold_205.263	56.85	19.254
evm.model.scaffold_340.43	56.85	12.326
evm.model.scaffold_241.195.1	56.85	11.597
evm.model.scaffold_461.598	56.84	84.598
evm.model.scaffold_320.628	56.84	54.893
evm.model.scaffold_28.1082	56.84	43.66
evm.model.scaffold_185.78	56.84	23.8
evm.model.scaffold_233.143	56.83	162.883
evm.model.scaffold_46.811	56.83	25.345
evm.model.scaffold_461.633.2	56.83	23.959
evm.model.scaffold_168.26	56.83	14.586
evm.model.scaffold_39.215	56.82	31.221
evm.model.scaffold_222.958	56.82	22.142
evm.model.scaffold_100.260.1	56.82	20.649
evm.model.scaffold_42.105	56.81	15.422
evm.model.scaffold_375.738	56.81	11.113
evm.model.scaffold_461.677	56.81	11.098
evm.model.scaffold_35.924	56.8	32.201
evm.model.scaffold_378.283	56.8	22.836
evm.model.scaffold_62.54	56.8	15.599
evm.model.scaffold_35.559	56.8	10.713
evm.model.scaffold_222.861	56.79	105.305
evm.model.scaffold_461.1166	56.79	28.736
evm.model.scaffold_28.553	56.79	27.457
evm.model.scaffold_37.115	56.79	11.308
evm.model.scaffold_185.337_evm.model.scaffold_185.338	56.78	78.859
evm.model.scaffold_69.57	56.78	12.974
evm.model.scaffold_40.1066.1	56.78	12.485
evm.model.scaffold_185.472	56.77	130.61
evm.model.scaffold_29.763	56.77	45.125
evm.model.scaffold_413.86	56.76	70.85
evm.model.scaffold_54.148	56.76	27.462
evm.model.scaffold_56.15	56.76	27.429
evm.model.scaffold_416.115	56.76	12.283
evm.model.scaffold_36.742	56.75	196.147
evm.model.scaffold_100.143	56.75	140.829
evm.model.scaffold_44.131	56.75	56.644
evm.model.scaffold_111.283	56.75	33.201
evm.model.scaffold_461.432	56.75	21.53
evm.model.scaffold_416.99	56.75	10.932
evm.model.scaffold_290.193	56.74	49.799
evm.model.scaffold_25.70	56.74	47.733
evm.model.scaffold_28.84	56.74	45.025
evm.model.scaffold_40.1519	56.74	23.406
evm.model.scaffold_36.1058	56.73	129.196
evm.model.scaffold_376.85	56.73	10.601
evm.model.scaffold_40.1281	56.72	106.741
evm.model.scaffold_100.958	56.72	40.46
evm.model.scaffold_457.306	56.72	22.082
evm.model.scaffold_46.683	56.72	20.506
evm.model.scaffold_376.170	56.72	10.459
evm.model.scaffold_36.1201	56.72	10.42
evm.model.scaffold_360.40	56.71	108.697
evm.model.scaffold_222.1704	56.71	40.835
evm.model.scaffold_299.227	56.71	29.786
evm.model.scaffold_290.342	56.71	28.416
evm.model.scaffold_18.234	56.71	23.686
evm.model.scaffold_40.1109	56.7	244.541
evm.model.scaffold_39.842	56.7	170.787
evm.model.scaffold_248.253	56.7	58.794
evm.model.scaffold_176.163	56.7	39.189
evm.model.scaffold_222.1108	56.7	37.254
evm.model.scaffold_35.172	56.7	19.062
evm.model.scaffold_206.417	56.69	89.294
evm.model.scaffold_5.1867	56.69	51.957
evm.model.scaffold_28.804	56.69	41.418
evm.model.scaffold_5.1315	56.69	16.301
evm.model.scaffold_40.998	56.69	11.66
evm.model.scaffold_37.41	56.68	1912.36
evm.model.scaffold_39.649	56.68	394.729
evm.model.scaffold_40.1720	56.68	51.27
evm.model.scaffold_222.1803	56.68	36.049
evm.model.scaffold_40.1675	56.68	19.901
evm.model.scaffold_36.895	56.68	17.226
evm.model.scaffold_222.351	56.68	11.503
evm.model.scaffold_424.28.5	56.68	10.124
evm.model.scaffold_378.85	56.67	20.038
evm.model.scaffold_97.608	56.67	19.778
evm.model.scaffold_40.618	56.67	10.037
evm.model.scaffold_142.221	56.66	29.08
evm.model.scaffold_35.572	56.66	28.689
evm.model.scaffold_40.1638	56.66	22.001
evm.model.scaffold_36.693.1	56.66	14.819
evm.model.scaffold_222.370	56.66	13.677
evm.model.scaffold_248.269	56.66	13.215
evm.model.scaffold_46.307	56.66	11.081
evm.model.scaffold_100.1342	56.65	74.093
evm.model.scaffold_39.555	56.65	44.068
evm.model.scaffold_248.15	56.65	21.812
evm.model.scaffold_461.103	56.65	18.224
evm.model.scaffold_69.506	56.65	11.427
evm.model.scaffold_36.816	56.64	129.431
evm.model.scaffold_36.1210	56.64	75.981
evm.model.scaffold_40.113.1	56.64	22.981
evm.model.scaffold_36.673	56.64	10.223
evm.model.scaffold_320.26	56.63	22.015
evm.model.scaffold_416.160	56.63	14.622
evm.model.scaffold_222.82	56.63	14.466
evm.model.scaffold_222.138	56.62	61.621
evm.model.scaffold_5.1877	56.62	39.291
evm.model.scaffold_18.65	56.62	34.416
evm.model.scaffold_36.1033	56.62	27.741
evm.model.scaffold_142.2	56.62	25.761
evm.model.scaffold_25.133	56.62	16.908
evm.model.scaffold_274.8	56.62	14.92
evm.model.scaffold_233.47	56.62	11.643
evm.model.scaffold_97.371	56.62	10.546
evm.model.scaffold_36.148	56.6	102.495
evm.model.scaffold_18.66	56.6	27.518
evm.model.scaffold_264.35	56.6	26.078
evm.model.scaffold_12.248	56.6	17.03
evm.model.scaffold_384.194	56.6	12.388
evm.model.scaffold_185.50	56.59	114.399
evm.model.scaffold_427.213	56.59	19.642
evm.model.scaffold_416.269	56.59	19.216
evm.model.scaffold_36.1009	56.58	113.923
evm.model.scaffold_394.147	56.58	49.839
evm.model.scaffold_100.1245	56.58	29.179
evm.model.scaffold_202.45	56.58	12.972
evm.model.scaffold_376.281	56.57	38.789
evm.model.scaffold_35.711	56.57	28.235
evm.model.scaffold_46.57	56.57	12.042
evm.model.scaffold_12.66	56.57	11.779
evm.model.scaffold_222.1158	56.56	45.486
evm.model.scaffold_427.184	56.56	43.828
evm.model.scaffold_100.778	56.56	28.429
evm.model.scaffold_307.142	56.55	75.848
evm.model.scaffold_39.1003	56.55	68.087
evm.model.scaffold_461.240	56.55	56.161
evm.model.scaffold_264.108	56.55	13.282
evm.model.scaffold_40.1413	56.54	145.483
evm.model.scaffold_248.393	56.54	112.261
evm.model.scaffold_36.796	56.54	56.578
evm.model.scaffold_241.332	56.54	44.506
evm.model.scaffold_5.705	56.54	15.776
evm.model.scaffold_5.605	56.54	14.34
evm.model.scaffold_5.27	56.54	12.051
evm.model.scaffold_222.692	56.53	22.169
evm.model.scaffold_100.1543	56.53	17.05
evm.model.scaffold_5.1485	56.53	14.864
evm.model.scaffold_375.363	56.52	190.352
evm.model.scaffold_416.333	56.52	85.273
evm.model.scaffold_36.710	56.52	37.211
evm.model.scaffold_54.50	56.52	15.044
evm.model.scaffold_457.685	56.51	31.031
evm.model.scaffold_241.349	56.51	24.883
evm.model.scaffold_36.1099	56.51	20.429
evm.model.scaffold_417.56	56.51	18.499
evm.model.scaffold_3.71	56.51	11.052
evm.model.scaffold_5.1960	56.5	355.741
evm.model.scaffold_46.709	56.5	185.827
evm.model.scaffold_29.700	56.5	64.676
evm.model.scaffold_12.41	56.5	32.97
evm.model.scaffold_5.129	56.5	18.743
evm.model.scaffold_36.854	56.5	15.311
evm.model.scaffold_471.66	56.5	13.601
evm.model.scaffold_320.643	56.5	11.918
evm.model.scaffold_36.1048	56.5	11.434
evm.model.scaffold_222.186	56.5	11.275
evm.model.scaffold_29.584.1	56.5	10.301
evm.model.scaffold_416.256	56.49	156.017
evm.model.scaffold_44.112	56.49	138.258
evm.model.scaffold_5.905	56.49	73.504
evm.model.scaffold_28.390	56.49	62.103
evm.model.scaffold_138.1	56.49	35.427
evm.model.scaffold_461.754	56.49	15.426
evm.model.scaffold_28.158.1	56.49	11.775
evm.model.scaffold_5.1102	56.49	11.416
evm.model.scaffold_208.34	56.48	96.035
evm.model.scaffold_461.829	56.48	33.035
evm.model.scaffold_222.1238	56.48	20.432
evm.model.scaffold_36.471	56.48	15.994
evm.model.scaffold_375.713	56.48	14.403
evm.model.scaffold_457.583	56.48	13.535
evm.model.scaffold_5.977	56.48	12.856
evm.model.scaffold_5.1615	56.48	12
evm.model.scaffold_44.256	56.47	45.76
evm.model.scaffold_457.660	56.47	30.149
evm.model.scaffold_299.28	56.47	17.17
evm.model.scaffold_28.994	56.47	12.387
evm.model.scaffold_5.1833	56.47	11.63
evm.model.scaffold_247.8	56.46	47.162
evm.model.scaffold_461.335	56.46	12.401
evm.model.scaffold_417.59	56.46	12.209
evm.model.scaffold_44.69	56.46	11.887
evm.model.scaffold_416.829	56.46	11.195
evm.model.scaffold_36.1254	56.45	133.285
evm.model.scaffold_162.78	56.45	103.188
evm.model.scaffold_40.655	56.45	68.325
evm.model.scaffold_111.267	56.44	19.504
evm.model.scaffold_5.1156	56.44	13.532
evm.model.scaffold_137.7	56.44	11.541
evm.model.scaffold_28.718	56.44	10.749
evm.model.scaffold_263.287	56.43	48.566
evm.model.scaffold_290.641	56.43	38.289
evm.model.scaffold_185.75	56.43	38.169
evm.model.scaffold_111.18	56.43	35.958
evm.model.scaffold_69.96	56.43	22.116
evm.model.scaffold_100.34	56.42	78.892
evm.model.scaffold_28.424	56.42	14.79
evm.model.scaffold_40.1603	56.41	132.512
evm.model.scaffold_91.16	56.41	124.416
evm.model.scaffold_40.1233	56.41	21.729
evm.model.scaffold_222.1029	56.41	21.545
evm.model.scaffold_320.532	56.41	19.537
evm.model.scaffold_36.547	56.41	13.832
evm.model.scaffold_100.660	56.41	11.999
evm.model.scaffold_307.46	56.4	105.297
evm.model.scaffold_189.71	56.4	21.682
evm.model.scaffold_46.494	56.4	16.695
evm.model.scaffold_60.51.1	56.4	15.65
evm.model.scaffold_40.599	56.4	13.534
evm.model.scaffold_461.1177	56.4	12.644
evm.model.scaffold_263.33	56.39	107.089
evm.model.scaffold_5.909	56.39	52.19
evm.model.scaffold_5.952	56.39	49.331
evm.model.scaffold_28.120	56.39	20.537
evm.model.scaffold_5.472	56.39	16.262
evm.model.scaffold_248.92	56.39	14.281
evm.model.scaffold_5.1954	56.39	11.366
evm.model.scaffold_99.60	56.39	10.398
evm.model.scaffold_206.801	56.38	55.767
evm.model.scaffold_44.286	56.38	43.938
evm.model.scaffold_394.557	56.38	41.964
evm.model.scaffold_42.157	56.38	31.237
evm.model.scaffold_99.75	56.38	26.374
evm.model.scaffold_457.616	56.37	22.072
evm.model.scaffold_471.160	56.37	12.81
evm.model.scaffold_471.59	56.36	47.985
evm.model.scaffold_28.462	56.36	19.939
evm.model.scaffold_4.87	56.36	14.736
evm.model.scaffold_162.218	56.35	101.612
evm.model.scaffold_231.15	56.35	74.43
evm.model.scaffold_375.163	56.35	28.784
evm.model.scaffold_7.53	56.35	25.672
evm.model.scaffold_36.324	56.35	21.751
evm.model.scaffold_222.1926	56.35	19.541
evm.model.scaffold_222.1856	56.35	10.422
evm.model.scaffold_48.110	56.34	75.758
evm.model.scaffold_29.705	56.34	39.294
evm.model.scaffold_208.36	56.34	39.13
evm.model.scaffold_100.536	56.34	26.225
evm.model.scaffold_39.324	56.34	24.921
evm.model.scaffold_375.101_evm.model.scaffold_375.102	56.34	18.39
evm.model.scaffold_142.147	56.34	17.423
evm.model.scaffold_162.118	56.34	11.07
evm.model.scaffold_375.487	56.33	95.283
evm.model.scaffold_39.9	56.33	56.908
evm.model.scaffold_29.280	56.33	45.035
evm.model.scaffold_36.1082	56.33	38.929
evm.model.scaffold_142.144	56.33	34.649
evm.model.scaffold_36.1161.3	56.33	28.411
evm.model.scaffold_290.368	56.33	17.374
evm.model.scaffold_176.261	56.33	17.114
evm.model.scaffold_100.1111	56.32	240.232
evm.model.scaffold_461.645	56.32	78.485
evm.model.scaffold_5.272	56.32	68.312
evm.model.scaffold_142.537	56.32	29.445
evm.model.scaffold_40.1657	56.32	29.012
evm.model.scaffold_69.107	56.32	20.613
evm.model.scaffold_97.530	56.32	18.665
evm.model.scaffold_113.5	56.32	14.756
evm.model.scaffold_35.441	56.32	11.449
evm.model.scaffold_44.470	56.32	10.987
evm.model.scaffold_185.56	56.31	58.435
evm.model.scaffold_248.130	56.31	36.509
evm.model.scaffold_5.1185	56.31	34.224
evm.model.scaffold_461.602.2	56.31	33.722
evm.model.scaffold_46.342	56.31	33.443
evm.model.scaffold_28.1075_evm.model.scaffold_28.1076	56.31	32.437
evm.model.scaffold_307.456	56.31	27.249
evm.model.scaffold_28.1099	56.31	22.409
evm.model.scaffold_40.1342	56.31	21.893
evm.model.scaffold_5.1465	56.31	20.148
evm.model.scaffold_300.297	56.31	11.206
evm.model.scaffold_263.151	56.3	63.273
evm.model.scaffold_36.375	56.3	18.624
evm.model.scaffold_36.584	56.3	13.906
evm.model.scaffold_394.365	56.3	12.127
evm.model.scaffold_7.105	56.29	25.933
evm.model.scaffold_378.77	56.29	17.993
evm.model.scaffold_461.904	56.28	24.768
evm.model.scaffold_222.1510	56.28	12.084
evm.model.scaffold_320.28	56.28	10.303
evm.model.scaffold_35.345	56.27	25.317
evm.model.scaffold_311.9	56.27	19.312
evm.model.scaffold_40.1049	56.27	13.779
evm.model.scaffold_369.140	56.27	13.739
evm.model.scaffold_21.22	56.27	10.572
evm.model.scaffold_100.827	56.26	69.295
evm.model.scaffold_206.788	56.26	51.687
evm.model.scaffold_40.477	56.26	26.487
evm.model.scaffold_111.346	56.26	20.321
evm.model.scaffold_416.679	56.26	19.36
evm.model.scaffold_142.272	56.26	13.101
evm.model.scaffold_222.400	56.25	121.271
evm.model.scaffold_5.612	56.25	44.713
evm.model.scaffold_394.264	56.25	21.583
evm.model.scaffold_378.384	56.25	12.205
evm.model.scaffold_416.263	56.24	58.578
evm.model.scaffold_176.8	56.24	48.822
evm.model.scaffold_461.617	56.24	10.747
evm.model.scaffold_5.238	56.23	34.44
evm.model.scaffold_461.850	56.23	11.114
evm.model.scaffold_461.346	56.23	10.932
evm.model.scaffold_142.431	56.22	56.836
evm.model.scaffold_29.405	56.22	43.187
evm.model.scaffold_36.202	56.22	29.65
evm.model.scaffold_400.88	56.22	16.414
evm.model.scaffold_172.36	56.21	129.942
evm.model.scaffold_206.833	56.21	63.394
evm.model.scaffold_45.21	56.21	34.874
evm.model.scaffold_264.170	56.21	32.051
evm.model.scaffold_264.215	56.21	22.146
evm.model.scaffold_461.161	56.21	10.411
evm.model.scaffold_233.211	56.2	59.078
evm.model.scaffold_51.124	56.2	17.136
evm.model.scaffold_384.219	56.2	13.611
evm.model.scaffold_396.234	56.2	12.885
evm.model.scaffold_36.488	56.19	71.571
evm.model.scaffold_28.632	56.19	57.449
evm.model.scaffold_69.160	56.19	56.105
evm.model.scaffold_248.72	56.19	55.478
evm.model.scaffold_181.15	56.19	22.03
evm.model.scaffold_209.52	56.19	13.036
evm.model.scaffold_40.1596	56.18	37.307
evm.model.scaffold_396.366	56.18	27.206
evm.model.scaffold_113.30	56.18	22.179
evm.model.scaffold_222.1122	56.18	18.23
evm.model.scaffold_185.310	56.17	57.041
evm.model.scaffold_413.71	56.17	23.263
evm.model.scaffold_376.11	56.17	20.918
evm.model.scaffold_61.30	56.17	16.502
evm.model.scaffold_176.228	56.17	15.492
evm.model.scaffold_162.224	56.17	13.726
evm.model.scaffold_35.746	56.17	10.353
evm.model.scaffold_42.7	56.16	304.508
evm.model.scaffold_394.66	56.16	90.925
evm.model.scaffold_35.1080	56.16	20.52
evm.model.scaffold_39.792	56.16	14.398
evm.model.scaffold_40.1549	56.16	13.144
evm.model.scaffold_29.510	56.16	11.69
evm.model.scaffold_273.81	56.16	10.323
evm.model.scaffold_222.411	56.15	68.07
evm.model.scaffold_202.93	56.15	49.033
evm.model.scaffold_36.1116	56.15	41.48
evm.model.scaffold_100.415	56.14	111.524
evm.model.scaffold_40.219	56.14	57.259
evm.model.scaffold_40.1588	56.14	48.259
evm.model.scaffold_36.81	56.14	22.568
evm.model.scaffold_28.887	56.14	20.98
evm.model.scaffold_461.1125	56.14	16.871
evm.model.scaffold_416.712	56.14	15.5
evm.model.scaffold_185.433	56.14	12.345
evm.model.scaffold_375.681	56.14	10.647
evm.model.scaffold_400.47	56.14	10.507
evm.model.scaffold_222.830	56.13	328.465
evm.model.scaffold_350.116	56.13	124.829
evm.model.scaffold_113.118	56.13	100.702
evm.model.scaffold_18.76	56.13	39.04
evm.model.scaffold_5.856	56.13	18.779
evm.model.scaffold_290.213	56.13	17.987
evm.model.scaffold_35.1001	56.13	10.697
evm.model.scaffold_100.1795	56.12	79.155
evm.model.scaffold_56.56	56.12	38.013
evm.model.scaffold_461.894_evm.model.scaffold_461.895	56.12	20.554
evm.model.scaffold_69.316.1	56.12	19.193
evm.model.scaffold_40.924	56.12	12.633
evm.model.scaffold_44.492	56.11	144.429
evm.model.scaffold_97.70	56.11	120.881
evm.model.scaffold_416.142	56.11	41.317
evm.model.scaffold_384.358	56.11	32.444
evm.model.scaffold_28.701	56.11	31.587
evm.model.scaffold_416.455	56.11	24.969
evm.model.scaffold_39.213	56.11	23.221
evm.model.scaffold_162.146	56.11	13.139
evm.model.scaffold_5.103	56.1	41.059
evm.model.scaffold_307.350	56.1	33.672
evm.model.scaffold_69.418	56.1	21.244
evm.model.scaffold_35.519	56.1	15.507
evm.model.scaffold_274.103	56.1	14.442
evm.model.scaffold_7.313	56.1	12.246
evm.model.scaffold_5.2012	56.09	41.081
evm.model.scaffold_111.398	56.09	39.045
evm.model.scaffold_264.126	56.09	27.692
evm.model.scaffold_461.536	56.09	23.593
evm.model.scaffold_29.494	56.09	20.076
evm.model.scaffold_461.1148	56.09	17.361
evm.model.scaffold_209.45	56.09	15.607
evm.model.scaffold_36.145	56.09	11.874
evm.model.scaffold_142.608	56.08	50.67
evm.model.scaffold_241.143	56.08	50.002
evm.model.scaffold_206.677	56.08	23.408
evm.model.scaffold_461.749	56.08	20.67
evm.model.scaffold_54.303.2	56.08	15.656
evm.model.scaffold_36.654.2	56.07	140.758
evm.model.scaffold_248.214	56.07	88.97
evm.model.scaffold_222.1804	56.07	26.74
evm.model.scaffold_100.452	56.07	24.531
evm.model.scaffold_162.254	56.07	23.224
evm.model.scaffold_69.314	56.07	21.21
evm.model.scaffold_46.345	56.07	13.313
evm.model.scaffold_46.877	56.06	27.965
evm.model.scaffold_14.149	56.06	26.662
evm.model.scaffold_227.17	56.06	21.305
evm.model.scaffold_5.1053	56.05	45.545
evm.model.scaffold_69.194	56.05	43.417
evm.model.scaffold_28.1093	56.05	30.076
evm.model.scaffold_416.944	56.05	27.709
evm.model.scaffold_46.193	56.05	26.906
evm.model.scaffold_222.304	56.05	26.197
evm.model.scaffold_5.1691	56.04	62.295
evm.model.scaffold_69.53	56.04	48.695
evm.model.scaffold_300.15	56.04	29.055
evm.model.scaffold_416.950	56.04	21.404
evm.model.scaffold_222.1134	56.04	20.824
evm.model.scaffold_7.141	56.04	12.352
evm.model.scaffold_461.794	56.04	12.072
evm.model.scaffold_222.1267	56.03	89.158
evm.model.scaffold_461.15	56.03	28.996
evm.model.scaffold_97.729	56.03	21.019
evm.model.scaffold_222.406	56.03	20.449
evm.model.scaffold_206.107	56.03	18.687
evm.model.scaffold_28.995	56.03	17.637
evm.model.scaffold_44.433	56.03	13.785
evm.model.scaffold_461.833	56.02	125.881
evm.model.scaffold_142.590	56.02	73.711
evm.model.scaffold_28.883	56.02	36.366
evm.model.scaffold_40.1447	56.02	29.725
evm.model.scaffold_61.2	56.01	63.46
evm.model.scaffold_461.231	56.01	42.794
evm.model.scaffold_3.32	56.01	19.354
evm.model.scaffold_100.378	56.01	18.283
evm.model.scaffold_100.300	56.01	15.769
evm.model.scaffold_36.155	56.01	10.962
evm.model.scaffold_185.541	56	128.345
evm.model.scaffold_36.162	56	75.599
evm.model.scaffold_97.272	56	39.526
evm.model.scaffold_461.347	56	16.055
evm.model.scaffold_54.333	56	15.391
evm.model.scaffold_111.6	56	15.26
evm.model.scaffold_29.726.1	55.99	195.789
evm.model.scaffold_40.119	55.99	154.055
evm.model.scaffold_29.220	55.99	67.811
evm.model.scaffold_35.228	55.98	112.026
evm.model.scaffold_25.167.3	55.98	22.601
evm.model.scaffold_100.1752	55.98	22.179
evm.model.scaffold_461.653	55.98	19.64
evm.model.scaffold_40.267	55.98	15.102
evm.model.scaffold_5.1522	55.98	10.924
evm.model.scaffold_97.790	55.98	10.088
evm.model.scaffold_36.221	55.97	1403.3
evm.model.scaffold_206.324	55.97	58.904
evm.model.scaffold_40.870	55.97	50.088
evm.model.scaffold_54.168	55.97	29.689
evm.model.scaffold_35.526	55.97	19.637
evm.model.scaffold_18.232	55.97	18.067
evm.model.scaffold_222.96	55.97	17.15
evm.model.scaffold_40.1284	55.97	13.371
evm.model.scaffold_69.378	55.97	11.049
evm.model.scaffold_39.307	55.96	110.577
evm.model.scaffold_376.144	55.96	94.989
evm.model.scaffold_12.170	55.96	36.638
evm.model.scaffold_461.500	55.96	19.113
evm.model.scaffold_100.384	55.96	16.694
evm.model.scaffold_375.60	55.95	35.152
evm.model.scaffold_241.197	55.95	30.885
evm.model.scaffold_185.361	55.95	20.468
evm.model.scaffold_5.1483	55.95	12.506
evm.model.scaffold_40.680	55.94	125.473
evm.model.scaffold_18.106	55.94	108.277
evm.model.scaffold_394.226	55.94	54.384
evm.model.scaffold_100.1490	55.94	47.829
evm.model.scaffold_42.8_evm.model.scaffold_42.9	55.94	47.223
evm.model.scaffold_461.111	55.94	25.604
evm.model.scaffold_5.404	55.93	128.487
evm.model.scaffold_476.9	55.93	103.493
evm.model.scaffold_4.110	55.93	77.401
evm.model.scaffold_36.946	55.93	62.804
evm.model.scaffold_222.373	55.93	16.441
evm.model.scaffold_100.701	55.93	13.454
evm.model.scaffold_54.51	55.92	82.623
evm.model.scaffold_29.302	55.92	26.734
evm.model.scaffold_35.100	55.92	26.402
evm.model.scaffold_36.1260	55.92	16.563
evm.model.scaffold_241.58	55.92	10.902
evm.model.scaffold_142.375	55.92	10.788
evm.model.scaffold_40.609	55.91	86.932
evm.model.scaffold_413.176	55.91	42.068
evm.model.scaffold_54.340	55.91	26.968
evm.model.scaffold_97.622	55.91	20.864
evm.model.scaffold_5.1269	55.91	17.918
evm.model.scaffold_241.276	55.9	63.362
evm.model.scaffold_12.75	55.9	50.502
evm.model.scaffold_29.81	55.9	43.224
evm.model.scaffold_375.217	55.9	30.632
evm.model.scaffold_300.168	55.9	19.282
evm.model.scaffold_40.1147	55.9	12.874
evm.model.scaffold_194.3	55.9	10.15
evm.model.scaffold_100.299	55.89	62.596
evm.model.scaffold_263.222	55.89	32.782
evm.model.scaffold_307.73	55.89	21.902
evm.model.scaffold_375.223	55.89	20.807
evm.model.scaffold_4.94	55.89	13.017
evm.model.scaffold_97.710	55.89	12.039
evm.model.scaffold_100.361	55.88	64.702
evm.model.scaffold_35.1086	55.88	20.631
evm.model.scaffold_461.369	55.88	14.516
evm.model.scaffold_7.335	55.88	10.433
evm.model.scaffold_111.137	55.87	215.046
evm.model.scaffold_12.101	55.87	55.485
evm.model.scaffold_461.874	55.87	41.697
evm.model.scaffold_274.70	55.87	29.213
evm.model.scaffold_264.115	55.87	27.486
evm.model.scaffold_40.884	55.87	15.766
evm.model.scaffold_5.1183	55.87	11.525
evm.model.scaffold_5.1545	55.86	148.176
evm.model.scaffold_111.299.1	55.86	83.035
evm.model.scaffold_40.1676	55.86	53.67
evm.model.scaffold_222.1892	55.86	32.494
evm.model.scaffold_36.978	55.86	25.889
evm.model.scaffold_42.438	55.86	16.804
evm.model.scaffold_307.105	55.86	16.088
evm.model.scaffold_35.1150	55.86	15.551
evm.model.scaffold_100.863	55.86	14.264
evm.model.scaffold_46.426	55.85	408.068
evm.model.scaffold_320.632	55.85	47.775
evm.model.scaffold_5.1820	55.85	25.831
evm.model.scaffold_320.494	55.85	23.352
evm.model.scaffold_416.23	55.85	17.328
evm.model.scaffold_5.158	55.85	12.251
evm.model.scaffold_189.26	55.85	10.657
evm.model.scaffold_222.596	55.84	47.852
evm.model.scaffold_5.1607	55.84	29.964
evm.model.scaffold_99.73	55.84	27.479
evm.model.scaffold_299.158	55.84	16.586
evm.model.scaffold_222.901_evm.model.scaffold_222.902	55.84	10.748
evm.model.scaffold_39.960	55.83	377.361
evm.model.scaffold_100.891	55.83	361.589
evm.model.scaffold_461.297	55.83	45.946
evm.model.scaffold_222.490	55.83	36.631
evm.model.scaffold_142.241	55.83	18.902
evm.model.scaffold_54.323	55.83	16.072
evm.model.scaffold_39.762	55.83	11.47
evm.model.scaffold_100.137	55.83	10.919
evm.model.scaffold_109.15	55.83	10.432
evm.model.scaffold_394.162	55.82	113.701
evm.model.scaffold_375.43	55.82	111.748
evm.model.scaffold_307.443	55.82	67.954
evm.model.scaffold_300.91	55.82	18.988
evm.model.scaffold_263.198	55.82	12.917
evm.model.scaffold_36.470	55.81	213.925
evm.model.scaffold_222.582	55.81	130.262
evm.model.scaffold_222.238	55.81	100.792
evm.model.scaffold_28.907	55.81	40.394
evm.model.scaffold_185.154	55.81	15.296
evm.model.scaffold_427.19	55.8	109.259
evm.model.scaffold_5.259	55.8	37.406
evm.model.scaffold_461.447	55.8	23.846
evm.model.scaffold_248.320	55.8	13.724
evm.model.scaffold_100.65	55.79	194.269
evm.model.scaffold_36.176	55.79	88.995
evm.model.scaffold_5.1856	55.79	82.286
evm.model.scaffold_28.945.1	55.79	76.4
evm.model.scaffold_222.833	55.79	65.11
evm.model.scaffold_36.655	55.79	36.802
evm.model.scaffold_185.131	55.79	34.4
evm.model.scaffold_39.779	55.79	18.894
evm.model.scaffold_461.1030	55.79	15.303
evm.model.scaffold_300.150	55.79	10.745
evm.model.scaffold_162.44	55.79	10.093
evm.model.scaffold_23.92.1	55.78	356.697
evm.model.scaffold_42.42	55.78	73.413
evm.model.scaffold_40.750	55.78	32.195
evm.model.scaffold_100.1749	55.78	12.887
evm.model.scaffold_5.2088	55.78	11.554
evm.model.scaffold_142.381	55.77	144.125
evm.model.scaffold_376.192	55.77	53.732
evm.model.scaffold_36.696	55.77	32.4
evm.model.scaffold_160.1	55.77	23.2
evm.model.scaffold_28.45	55.77	10.084
evm.model.scaffold_394.384	55.76	50.064
evm.model.scaffold_111.236	55.76	36.739
evm.model.scaffold_5.1880.2	55.76	32.571
evm.model.scaffold_471.159	55.76	16.904
evm.model.scaffold_461.785	55.76	16.869
evm.model.scaffold_222.1596	55.76	14.618
evm.model.scaffold_461.670	55.76	11.855
evm.model.scaffold_39.592	55.76	10.848
evm.model.scaffold_97.728	55.75	77.398
evm.model.scaffold_340.75	55.75	76.428
evm.model.scaffold_36.627	55.75	43.036
evm.model.scaffold_5.480	55.75	38.077
evm.model.scaffold_5.2085	55.75	27.88
evm.model.scaffold_222.1761	55.75	25.306
evm.model.scaffold_28.624	55.75	22.18
evm.model.scaffold_222.1013	55.75	18.494
evm.model.scaffold_248.85	55.75	12.005
evm.model.scaffold_375.123	55.74	33.214
evm.model.scaffold_222.361	55.74	27.788
evm.model.scaffold_7.314	55.74	19.704
evm.model.scaffold_29.228	55.74	13.892
evm.model.scaffold_376.211	55.74	11.812
evm.model.scaffold_97.509	55.73	69.943
evm.model.scaffold_145.43	55.73	21.883
evm.model.scaffold_375.99	55.73	18.603
evm.model.scaffold_35.88	55.73	11.861
evm.model.scaffold_176.156	55.72	1179.08
evm.model.scaffold_290.91	55.72	84.755
evm.model.scaffold_100.1439	55.72	46.279
evm.model.scaffold_248.487	55.72	42.063
evm.model.scaffold_185.255	55.72	38.959
evm.model.scaffold_5.942	55.72	22.287
evm.model.scaffold_36.385	55.72	17.287
evm.model.scaffold_69.97	55.71	66.646
evm.model.scaffold_222.932	55.71	22.724
evm.model.scaffold_320.675	55.71	18.121
evm.model.scaffold_39.582	55.71	14.42
evm.model.scaffold_176.330	55.71	14.233
evm.model.scaffold_35.644	55.71	11.609
evm.model.scaffold_424.45	55.7	135.287
evm.model.scaffold_62.134	55.7	41.085
evm.model.scaffold_40.501	55.69	203.019
evm.model.scaffold_185.275	55.69	68.167
evm.model.scaffold_36.1037	55.69	67.652
evm.model.scaffold_40.630	55.69	56.876
evm.model.scaffold_461.508	55.69	45.848
evm.model.scaffold_461.239	55.69	42.812
evm.model.scaffold_29.337	55.69	24.296
evm.model.scaffold_375.412_evm.model.scaffold_375.414	55.69	17.882
evm.model.scaffold_416.778	55.69	17.821
evm.model.scaffold_48.25	55.69	17.732
evm.model.scaffold_5.906	55.69	15.048
evm.model.scaffold_40.1077	55.69	11.286
evm.model.scaffold_100.1434	55.68	134.393
evm.model.scaffold_394.496_evm.model.scaffold_394.497	55.68	60.767
evm.model.scaffold_320.543	55.68	35.52
evm.model.scaffold_264.196	55.68	28.724
evm.model.scaffold_36.645	55.68	27.276
evm.model.scaffold_461.164	55.68	26.037
evm.model.scaffold_376.140	55.68	17.19
evm.model.scaffold_69.27	55.67	147.691
evm.model.scaffold_35.575	55.67	103.766
evm.model.scaffold_35.522	55.67	57.863
evm.model.scaffold_14.163	55.67	21.292
evm.model.scaffold_206.518	55.66	230.699
evm.model.scaffold_461.746_evm.model.scaffold_461.747	55.66	142.331
evm.model.scaffold_28.515	55.66	85.003
evm.model.scaffold_97.634	55.66	49.54
evm.model.scaffold_137.1	55.66	48.987
evm.model.scaffold_222.585	55.66	41.39
evm.model.scaffold_172.45	55.66	29.218
evm.model.scaffold_100.1370	55.66	28.951
evm.model.scaffold_290.318	55.66	17.903
evm.model.scaffold_461.235	55.66	16.985
evm.model.scaffold_222.950	55.66	13.933
evm.model.scaffold_264.71	55.65	132.691
evm.model.scaffold_222.208	55.65	82.985
evm.model.scaffold_248.457.2	55.65	57.633
evm.model.scaffold_461.1105	55.65	48.39
evm.model.scaffold_28.412	55.65	42.693
evm.model.scaffold_40.499	55.65	38.504
evm.model.scaffold_42.428	55.65	32.915
evm.model.scaffold_36.84	55.65	28.971
evm.model.scaffold_46.413	55.65	28.51
evm.model.scaffold_320.241	55.65	27.522
evm.model.scaffold_51.64	55.65	27.447
evm.model.scaffold_206.685	55.64	91.914
evm.model.scaffold_5.94	55.64	45.6
evm.model.scaffold_375.353	55.64	27.612
evm.model.scaffold_457.750	55.64	22.434
evm.model.scaffold_54.112	55.64	21.791
evm.model.scaffold_54.5	55.64	17.623
evm.model.scaffold_142.33	55.63	524.339
evm.model.scaffold_100.884	55.63	106.548
evm.model.scaffold_145.45.1	55.63	89.023
evm.model.scaffold_320.168	55.63	41.33
evm.model.scaffold_248.516	55.63	22.242
evm.model.scaffold_196.34	55.63	10.939
evm.model.scaffold_233.237	55.62	100.61
evm.model.scaffold_457.749	55.62	50.118
evm.model.scaffold_100.97	55.62	26.295
evm.model.scaffold_273.257	55.62	22.36
evm.model.scaffold_40.1244	55.62	20.729
evm.model.scaffold_320.571	55.62	19.394
evm.model.scaffold_222.1449.1	55.62	17.333
evm.model.scaffold_461.756	55.62	14.337
evm.model.scaffold_185.428	55.62	10.141
evm.model.scaffold_54.140	55.61	45.756
evm.model.scaffold_142.641	55.61	18.441
evm.model.scaffold_300.319	55.61	14.884
evm.model.scaffold_61.52	55.61	14.259
evm.model.scaffold_396.67	55.61	10.87
evm.model.scaffold_40.1266	55.6	133.793
evm.model.scaffold_176.289	55.6	40.042
evm.model.scaffold_424.9	55.6	24.981
evm.model.scaffold_273.73	55.6	23.342
evm.model.scaffold_5.127	55.6	20.063
evm.model.scaffold_142.364	55.6	12.789
evm.model.scaffold_273.150	55.6	11.456
evm.model.scaffold_208.4	55.6	10.029
evm.model.scaffold_46.766	55.59	193.917
evm.model.scaffold_46.530	55.59	61.321
evm.model.scaffold_42.151	55.59	53.762
evm.model.scaffold_40.1286	55.59	20.655
evm.model.scaffold_461.893	55.59	13.312
evm.model.scaffold_31.78	55.59	11.413
evm.model.scaffold_375.654	55.59	10.984
evm.model.scaffold_35.1014	55.59	10.294
evm.model.scaffold_5.1516	55.58	217.59
evm.model.scaffold_100.434	55.58	40.375
evm.model.scaffold_375.661	55.58	32.616
evm.model.scaffold_263.215	55.58	22.996
evm.model.scaffold_5.703	55.58	22.667
evm.model.scaffold_394.362	55.57	136.347
evm.model.scaffold_35.174	55.57	80.143
evm.model.scaffold_69.180	55.57	34.676
evm.model.scaffold_5.466	55.57	16.517
evm.model.scaffold_113.3	55.57	15.55
evm.model.scaffold_9.212	55.57	14.702
evm.model.scaffold_206.213	55.57	10.629
evm.model.scaffold_461.90	55.56	45.786
evm.model.scaffold_29.381	55.56	45.285
evm.model.scaffold_5.893.1	55.56	33.412
evm.model.scaffold_394.395	55.56	14.444
evm.model.scaffold_457.612	55.56	13.332
evm.model.scaffold_181.44	55.56	11.829
evm.model.scaffold_222.1542	55.55	218.576
evm.model.scaffold_7.267	55.55	25.006
evm.model.scaffold_29.241	55.55	23.632
evm.model.scaffold_46.350.1	55.55	20.209
evm.model.scaffold_28.199	55.55	18.449
evm.model.scaffold_461.1184	55.55	15.604
evm.model.scaffold_206.719	55.55	10.499
evm.model.scaffold_5.1722	55.55	10.142
evm.model.scaffold_384.212	55.54	117.77
evm.model.scaffold_461.206	55.54	59.132
evm.model.scaffold_54.207	55.54	55.261
evm.model.scaffold_39.124	55.54	52.049
evm.model.scaffold_28.483	55.54	47.964
evm.model.scaffold_375.264	55.54	40.149
evm.model.scaffold_176.130	55.54	18.712
evm.model.scaffold_394.555	55.54	14.003
evm.model.scaffold_35.113	55.54	11.626
evm.model.scaffold_176.73	55.53	154.063
evm.model.scaffold_29.586	55.53	55.285
evm.model.scaffold_461.543	55.53	45.918
evm.model.scaffold_46.616	55.53	37.349
evm.model.scaffold_5.1821	55.53	23.989
evm.model.scaffold_461.1197	55.53	17.816
evm.model.scaffold_36.618	55.53	12.931
evm.model.scaffold_62.136	55.52	109.649
evm.model.scaffold_145.29	55.52	43.32
evm.model.scaffold_222.1245	55.51	142.423
evm.model.scaffold_14.216	55.51	83.427
evm.model.scaffold_273.70	55.51	60.791
evm.model.scaffold_300.141	55.51	51.055
evm.model.scaffold_7.302	55.51	20.019
evm.model.scaffold_5.559	55.51	14.278
evm.model.scaffold_39.352	55.51	11.819
evm.model.scaffold_62.162	55.51	11.299
evm.model.scaffold_222.353	55.5	56.574
evm.model.scaffold_375.603	55.5	41.854
evm.model.scaffold_9.26	55.5	24.878
evm.model.scaffold_15.1	55.5	13.897
evm.model.scaffold_461.473	55.5	12.634
evm.model.scaffold_40.1474	55.5	12.02
evm.model.scaffold_222.1490	55.5	11.259
evm.model.scaffold_375.714	55.49	591.418
evm.model.scaffold_111.336	55.49	152.962
evm.model.scaffold_263.26	55.49	82.217
evm.model.scaffold_384.210	55.49	21.345
evm.model.scaffold_5.1356	55.49	18.201
evm.model.scaffold_222.783	55.48	184.452
evm.model.scaffold_416.175	55.48	37.559
evm.model.scaffold_375.290	55.48	16.758
evm.model.scaffold_290.153.3	55.48	16.522
evm.model.scaffold_206.57_evm.model.scaffold_206.58	55.48	15.608
evm.model.scaffold_274.50	55.48	15.588
evm.model.scaffold_36.923.1	55.47	99.665
evm.model.scaffold_386.129	55.47	35.133
evm.model.scaffold_378.303	55.47	33.119
evm.model.scaffold_5.1638	55.47	22.681
evm.model.scaffold_461.188	55.47	17.575
evm.model.scaffold_241.157	55.47	15.313
evm.model.scaffold_176.196	55.47	13.336
evm.model.scaffold_162.43	55.46	153.205
evm.model.scaffold_189.11	55.46	77.597
evm.model.scaffold_36.271	55.46	75.799
evm.model.scaffold_100.505	55.46	68.871
evm.model.scaffold_400.41	55.46	40.362
evm.model.scaffold_51.121	55.46	22.593
evm.model.scaffold_36.197	55.45	103.491
evm.model.scaffold_396.111	55.45	68.219
evm.model.scaffold_36.282	55.45	49.566
evm.model.scaffold_40.505	55.45	26.867
evm.model.scaffold_5.1673	55.45	24.943
evm.model.scaffold_222.970	55.45	16.286
evm.model.scaffold_5.1819	55.45	13.248
evm.model.scaffold_375.685	55.45	10.034
evm.model.scaffold_97.749	55.44	108.595
evm.model.scaffold_375.207	55.44	42.513
evm.model.scaffold_54.81	55.44	14.562
evm.model.scaffold_28.156	55.43	68.704
evm.model.scaffold_394.134	55.43	42.397
evm.model.scaffold_29.137	55.43	22.476
evm.model.scaffold_5.1874.1	55.43	17.565
evm.model.scaffold_300.115	55.43	17.418
evm.model.scaffold_35.1070	55.43	13.42
evm.model.scaffold_206.62	55.42	165.032
evm.model.scaffold_206.132	55.42	46.785
evm.model.scaffold_5.37	55.42	36.906
evm.model.scaffold_100.1103	55.42	31.798
evm.model.scaffold_416.88	55.42	24.477
evm.model.scaffold_222.401	55.42	20.628
evm.model.scaffold_384.22	55.42	12.954
evm.model.scaffold_206.564	55.42	12.9
evm.model.scaffold_320.635	55.41	85.001
evm.model.scaffold_222.1191	55.41	52.917
evm.model.scaffold_97.220	55.41	41.906
evm.model.scaffold_376.33	55.41	27.628
evm.model.scaffold_264.38	55.41	22.296
evm.model.scaffold_378.292	55.41	17.007
evm.model.scaffold_375.235	55.41	11.88
evm.model.scaffold_222.618	55.41	10.034
evm.model.scaffold_193.10	55.4	300.104
evm.model.scaffold_100.838	55.4	224.636
evm.model.scaffold_29.439	55.4	42.538
evm.model.scaffold_36.172.1	55.4	30.735
evm.model.scaffold_142.456	55.4	23.075
evm.model.scaffold_461.457	55.4	15.225
evm.model.scaffold_34.16	55.4	13.232
evm.model.scaffold_40.1021	55.4	12.468
evm.model.scaffold_39.71	55.4	11.209
evm.model.scaffold_44.368	55.4	10.248
evm.model.scaffold_263.52	55.39	108.402
evm.model.scaffold_222.1754	55.39	37.726
evm.model.scaffold_248.35	55.39	30.596
evm.model.scaffold_396.420	55.39	26.952
evm.model.scaffold_100.1313	55.39	23.788
evm.model.scaffold_100.532	55.39	15.017
evm.model.scaffold_29.490	55.39	10.652
evm.model.scaffold_222.749	55.38	102.494
evm.model.scaffold_206.559	55.38	59.776
evm.model.scaffold_222.928	55.38	38.434
evm.model.scaffold_69.111	55.38	37.418
evm.model.scaffold_46.223.1	55.38	31.252
evm.model.scaffold_375.109	55.38	26.268
evm.model.scaffold_222.498	55.38	15.674
evm.model.scaffold_36.10	55.38	13.474
evm.model.scaffold_36.158	55.38	12.562
evm.model.scaffold_36.800	55.37	140.818
evm.model.scaffold_386.155	55.37	28.097
evm.model.scaffold_290.607	55.37	23.166
evm.model.scaffold_324.39	55.37	17.841
evm.model.scaffold_18.93	55.37	14.457
evm.model.scaffold_17.32	55.37	11.513
evm.model.scaffold_28.739	55.36	136.12
evm.model.scaffold_222.1627	55.36	43.299
evm.model.scaffold_457.91	55.36	40.477
evm.model.scaffold_35.536	55.36	20.052
evm.model.scaffold_231.71	55.36	19.011
evm.model.scaffold_376.310	55.36	11.061
evm.model.scaffold_416.79	55.35	167.041
evm.model.scaffold_100.782	55.35	91.758
evm.model.scaffold_35.933	55.35	57.932
evm.model.scaffold_461.83	55.35	45.26
evm.model.scaffold_42.142	55.35	34.327
evm.model.scaffold_248.313	55.35	29.373
evm.model.scaffold_248.18	55.35	26.556
evm.model.scaffold_320.66	55.35	24.556
evm.model.scaffold_29.349	55.35	12.178
evm.model.scaffold_142.441	55.34	622.188
evm.model.scaffold_100.897	55.34	156.998
evm.model.scaffold_461.1103	55.34	131.587
evm.model.scaffold_28.978	55.34	93.456
evm.model.scaffold_264.50	55.34	20.63
evm.model.scaffold_419.76	55.34	18.305
evm.model.scaffold_5.63	55.34	16.718
evm.model.scaffold_28.95	55.33	66.258
evm.model.scaffold_100.506	55.33	35.386
evm.model.scaffold_69.289	55.33	18.672
evm.model.scaffold_46.232	55.33	11.132
evm.model.scaffold_36.581	55.32	228.499
evm.model.scaffold_97.319	55.32	218.181
evm.model.scaffold_394.309.2	55.32	155.297
evm.model.scaffold_369.96.2	55.32	81.66
evm.model.scaffold_222.425	55.32	38.386
evm.model.scaffold_100.656	55.32	34.862
evm.model.scaffold_40.1218.1	55.32	26.072
evm.model.scaffold_5.184	55.32	23.403
evm.model.scaffold_36.761	55.32	17.315
evm.model.scaffold_29.127	55.32	11.553
evm.model.scaffold_222.445	55.31	136.33
evm.model.scaffold_222.1625	55.31	99.894
evm.model.scaffold_28.50	55.31	53.035
evm.model.scaffold_100.941	55.31	50.986
evm.model.scaffold_48.31	55.31	43.366
evm.model.scaffold_29.463	55.31	29.368
evm.model.scaffold_417.88	55.31	18.896
evm.model.scaffold_44.505	55.29	98.374
evm.model.scaffold_222.503	55.29	66.239
evm.model.scaffold_35.127	55.29	65.356
evm.model.scaffold_28.749.1	55.29	34.096
evm.model.scaffold_35.328	55.29	32.118
evm.model.scaffold_222.439	55.29	16.787
evm.model.scaffold_40.1140	55.29	11.131
evm.model.scaffold_350.53.1	55.29	10.477
evm.model.scaffold_424.60	55.28	64.852
evm.model.scaffold_222.1615	55.28	12.015
evm.model.scaffold_46.212	55.27	168.906
evm.model.scaffold_142.365	55.27	105.539
evm.model.scaffold_264.197.1	55.27	103.52
evm.model.scaffold_46.636	55.27	81.025
evm.model.scaffold_290.124	55.27	30.554
[truncated: 4,691 more rows]

## Sheet: Mideum-level
Gene	ENC	RPKM
evm.model.scaffold_30.38	54.48	7.626
evm.model.scaffold_30.27	47.6	5.801
evm.model.scaffold_30.9	61	9.122
evm.model.scaffold_30.53	51.09	2.739
evm.model.scaffold_30.28	50.83	5.172
evm.model.scaffold_30.59	45.58	9.115
evm.model.scaffold_30.64	51.45	4.987
evm.model.scaffold_30.52	49.76	3.171
evm.model.scaffold_30.72	55.2	3.117
evm.model.scaffold_405.1.1	51.89	1.561
evm.model.scaffold_185.467	42.41	1.291
evm.model.scaffold_185.43	51.84	5.143
evm.model.scaffold_185.439	51.17	8.547
evm.model.scaffold_185.465_evm.model.scaffold_185.466	51.39	1.755
evm.model.scaffold_185.442	51.47	1.883
evm.model.scaffold_185.120	48.3	9.482
evm.model.scaffold_185.500	52.87	4.551
evm.model.scaffold_185.299	53.15	3.709
evm.model.scaffold_185.295	55.52	4.335
evm.model.scaffold_185.285	50.04	6.844
evm.model.scaffold_185.403	58.77	9.078
evm.model.scaffold_185.245	51.69	1.019
evm.model.scaffold_185.390	52.89	7.061
evm.model.scaffold_185.375	32.61	2.453
evm.model.scaffold_185.111	49.5	5.392
evm.model.scaffold_185.494	49.33	2.577
evm.model.scaffold_185.140	51.21	1.552
evm.model.scaffold_185.314	50.76	1.043
evm.model.scaffold_185.324	46	6.055
evm.model.scaffold_185.125	52.09	6.626
evm.model.scaffold_185.264	56.94	9.438
evm.model.scaffold_185.269	44.05	6.145
evm.model.scaffold_185.363	44.56	6.586
evm.model.scaffold_185.274	50.83	5.136
evm.model.scaffold_185.427	50.17	1.552
evm.model.scaffold_185.296	58.91	4.211
evm.model.scaffold_185.353	49.68	8.77
evm.model.scaffold_185.440	51.71	8.684
evm.model.scaffold_185.105	56.32	2.653
evm.model.scaffold_185.499	52.64	7.681
evm.model.scaffold_185.212	38.83	2.375
evm.model.scaffold_185.80	50.52	2.755
evm.model.scaffold_185.448	54.76	5.756
evm.model.scaffold_185.38	55.52	1.129
evm.model.scaffold_185.397	55.68	1.045
evm.model.scaffold_185.249	45.58	5.387
evm.model.scaffold_185.443	52.47	2.331
evm.model.scaffold_185.138	54.25	5.288
evm.model.scaffold_185.116	49.39	9.438
evm.model.scaffold_185.479	60.23	7.254
evm.model.scaffold_185.336	45.57	1.668
evm.model.scaffold_185.141	50.14	1.338
evm.model.scaffold_185.46	52.55	7.614
evm.model.scaffold_185.392.1	56.43	1.34
evm.model.scaffold_185.400	53.05	8.402
evm.model.scaffold_185.507	50.07	9.363
evm.model.scaffold_185.119	49.51	1.992
evm.model.scaffold_185.146	49.24	5.643
evm.model.scaffold_185.446	57.12	3.059
evm.model.scaffold_185.98	50.75	3.507
evm.model.scaffold_185.480	51.07	4.388
evm.model.scaffold_185.237	51.7	7.174
evm.model.scaffold_185.335	54.89	3.708
evm.model.scaffold_185.123	53.61	1.062
evm.model.scaffold_185.447	51.62	6.531
evm.model.scaffold_185.352	59.01	1.953
evm.model.scaffold_185.539	49.89	7.696
evm.model.scaffold_185.516	48.74	2.52
evm.model.scaffold_185.71	53.07	4.525
evm.model.scaffold_185.20	58.21	1.966
evm.model.scaffold_185.288	47.3	1.724
evm.model.scaffold_185.183	52.31	6.271
evm.model.scaffold_185.69	58.39	5.261
evm.model.scaffold_185.74	51.63	1.267
evm.model.scaffold_185.136	50.26	4.266
evm.model.scaffold_185.221	53.65	4.802
evm.model.scaffold_185.327	51.81	2.709
evm.model.scaffold_185.300	52.78	5.823
evm.model.scaffold_185.81	54.28	1.428
evm.model.scaffold_185.68	48.25	1.468
evm.model.scaffold_185.58	55.73	2.947
evm.model.scaffold_185.218	54.67	6.248
evm.model.scaffold_185.1	49.8	2.914
evm.model.scaffold_185.222	56.91	4.908
evm.model.scaffold_185.193	58.42	2.796
evm.model.scaffold_185.30	42.53	4.758
evm.model.scaffold_185.90	53.83	7.402
evm.model.scaffold_185.512	56.3	3.434
evm.model.scaffold_185.354	56.28	8.364
evm.model.scaffold_185.145	50.1	4.252
evm.model.scaffold_185.200	50.9	2.488
evm.model.scaffold_185.257	57.17	8.816
evm.model.scaffold_185.453	40.74	8.416
evm.model.scaffold_185.478	48.89	8.394
evm.model.scaffold_185.302	55.01	5.367
evm.model.scaffold_185.529	51.76	1.155
evm.model.scaffold_185.387	50.73	4.425
evm.model.scaffold_185.194	51.35	3.07
evm.model.scaffold_185.36	55	2.016
evm.model.scaffold_185.423	52.65	8.651
evm.model.scaffold_185.371	47.47	4.663
evm.model.scaffold_185.203	40.44	1.662
evm.model.scaffold_185.477	50.25	9.51
evm.model.scaffold_185.271	43.15	8.493
evm.model.scaffold_185.382	50.5	5.429
evm.model.scaffold_185.97	44.55	4.287
evm.model.scaffold_185.409	43.19	1.397
evm.model.scaffold_185.42	53.82	6.573
evm.model.scaffold_185.459.1	54.23	6.611
evm.model.scaffold_185.211	49.81	5.076
evm.model.scaffold_185.100	59.19	8.011
evm.model.scaffold_185.434	53.6	2.883
evm.model.scaffold_185.503	49.69	2.894
evm.model.scaffold_185.242	51.77	8.901
evm.model.scaffold_185.24	50.74	2.487
evm.model.scaffold_185.373	56.99	1.327
evm.model.scaffold_185.267	56.76	7.337
evm.model.scaffold_185.469	50.98	8.406
evm.model.scaffold_185.366	50	1.599
evm.model.scaffold_185.537	49.44	1.345
evm.model.scaffold_185.345	50.59	1.107
evm.model.scaffold_185.142	55.41	1.212
evm.model.scaffold_185.474	54.07	1.03
evm.model.scaffold_185.286	60.05	4.263
evm.model.scaffold_185.173	47.61	1.874
evm.model.scaffold_185.65	48.9	1.268
evm.model.scaffold_185.252	49.93	4.539
evm.model.scaffold_185.21_evm.model.scaffold_185.22	56.93	1.383
evm.model.scaffold_185.12_evm.model.scaffold_185.13	53.02	6.958
evm.model.scaffold_185.139	52.23	9.548
evm.model.scaffold_185.393	54.09	1.739
evm.model.scaffold_185.76	54.76	3.383
evm.model.scaffold_185.196	52.95	1.948
evm.model.scaffold_185.344	55.43	2.586
evm.model.scaffold_185.220	50.12	8.071
evm.model.scaffold_185.224	44.74	4.799
evm.model.scaffold_185.493	43.98	1.621
evm.model.scaffold_185.398	57.89	2.802
evm.model.scaffold_185.343	55.67	6.56
evm.model.scaffold_185.210	49.35	5.711
evm.model.scaffold_185.297	52.93	3.829
evm.model.scaffold_185.108	61	1.633
evm.model.scaffold_185.209	53	9.621
evm.model.scaffold_185.475	46.88	2.976
evm.model.scaffold_185.342	55.4	7.47
evm.model.scaffold_185.333	57.19	7.342
evm.model.scaffold_185.101	50.76	6.22
evm.model.scaffold_185.147	49.86	9.265
evm.model.scaffold_185.219	54.23	8.488
evm.model.scaffold_185.304	52.11	3.356
evm.model.scaffold_185.483	56.66	3.091
evm.model.scaffold_185.513	47.65	4.687
evm.model.scaffold_185.239	50.87	8.517
evm.model.scaffold_185.160	51.97	2.399
evm.model.scaffold_185.341	49.78	7.683
evm.model.scaffold_185.289	51.77	4.393
evm.model.scaffold_185.449	49.9	4.575
evm.model.scaffold_185.530	52.39	5.697
evm.model.scaffold_185.265	53.11	4.457
evm.model.scaffold_185.243	51.84	5.807
evm.model.scaffold_185.502	55.23	3.023
evm.model.scaffold_185.450	52.79	9.162
evm.model.scaffold_185.511	51.65	1.053
evm.model.scaffold_287.4	53.38	2.207
evm.model.scaffold_35.82	49.74	1.35
evm.model.scaffold_35.1161	49.64	2.942
evm.model.scaffold_35.330	52.4	4.481
evm.model.scaffold_35.905	54.3	8.543
evm.model.scaffold_35.417	49.44	7.604
evm.model.scaffold_35.89	43.65	2.933
evm.model.scaffold_35.548	29.82	1.605
evm.model.scaffold_35.436	48.35	3.39
evm.model.scaffold_35.192	57.63	7.185
evm.model.scaffold_35.1176	49.21	5.064
evm.model.scaffold_35.719	50.66	1.203
evm.model.scaffold_35.697	48.93	2.259
evm.model.scaffold_35.273	52.82	5.17
evm.model.scaffold_35.94	53.95	5.601
evm.model.scaffold_35.110	51.76	4.144
evm.model.scaffold_35.296	50.27	6.859
evm.model.scaffold_35.176	51.07	9.069
evm.model.scaffold_35.1026	53.04	5.633
evm.model.scaffold_35.354	51.62	7.242
evm.model.scaffold_35.709	51.78	3.117
evm.model.scaffold_35.416	45.07	8.026
evm.model.scaffold_35.689	42.78	5.906
evm.model.scaffold_35.955	57.58	3.8
evm.model.scaffold_35.1124	46.15	1.417
evm.model.scaffold_35.285	53.75	1.419
evm.model.scaffold_35.1059	53.47	9.002
evm.model.scaffold_35.298	53.31	9.044
evm.model.scaffold_35.16	52.41	4.521
evm.model.scaffold_35.1139	49.96	6.615
evm.model.scaffold_35.1104	47.83	7.147
evm.model.scaffold_35.911	44.98	2.699
evm.model.scaffold_35.948	44.54	2.385
evm.model.scaffold_35.695	51.87	8.224
evm.model.scaffold_35.712	52.93	2.41
evm.model.scaffold_35.55	48.67	1.036
evm.model.scaffold_35.138	52.34	1.025
evm.model.scaffold_35.917	46.07	1.088
evm.model.scaffold_35.393	46.19	3.069
evm.model.scaffold_35.803	47.57	7.787
evm.model.scaffold_35.1132	52.71	6.556
evm.model.scaffold_35.213	52.09	8.757
evm.model.scaffold_35.906	50.8	1.204
evm.model.scaffold_35.782	53.32	6.954
evm.model.scaffold_35.1181	47.62	6.978
evm.model.scaffold_35.593	57.54	9.436
evm.model.scaffold_35.947	54.14	6.658
evm.model.scaffold_35.692	50.42	6.355
evm.model.scaffold_35.243	50.88	6.655
evm.model.scaffold_35.451	52.62	4.846
evm.model.scaffold_35.61	56.44	8.966
evm.model.scaffold_35.195	47.59	1.502
evm.model.scaffold_35.600	50.06	5.332
evm.model.scaffold_35.832	53.7	5.923
evm.model.scaffold_35.86	55.3	3.736
evm.model.scaffold_35.1075	54.26	2.271
evm.model.scaffold_35.121	42.57	1.784
evm.model.scaffold_35.1021	52.59	3.742
evm.model.scaffold_35.605	50.71	8.214
evm.model.scaffold_35.381	53.4	3.529
evm.model.scaffold_35.899	38.07	7.758
evm.model.scaffold_35.392	46.31	2.985
evm.model.scaffold_35.11	37.4	2.867
evm.model.scaffold_35.1041	49.68	8.147
evm.model.scaffold_35.128	53.97	3.088
evm.model.scaffold_35.166	53.11	2.461
evm.model.scaffold_35.986	47.05	1.256
evm.model.scaffold_35.224	48.21	1.642
evm.model.scaffold_35.871	51.15	8.59
evm.model.scaffold_35.1145	52.5	2.992
evm.model.scaffold_35.62	57.85	1.802
evm.model.scaffold_35.808	52.03	7.543
evm.model.scaffold_35.1101	53.91	9.26
evm.model.scaffold_35.268	50.54	1.509
evm.model.scaffold_35.365	50.19	8.461
evm.model.scaffold_35.263	40.7	1.042
evm.model.scaffold_35.78	52.2	7.684
evm.model.scaffold_35.242	46.41	2.592
evm.model.scaffold_35.972	53.68	8.361
evm.model.scaffold_35.630	51.71	6.888
evm.model.scaffold_35.710	60.24	6.468
evm.model.scaffold_35.910	50.66	1.962
evm.model.scaffold_35.985	50	2.829
evm.model.scaffold_35.611	55.25	8.415
evm.model.scaffold_35.612	43.64	2.231
evm.model.scaffold_35.566	42.46	1.862
evm.model.scaffold_35.373	51.83	6.139
evm.model.scaffold_35.756	54.14	6.408
evm.model.scaffold_35.445	57.1	8.521
evm.model.scaffold_35.38.5	53.54	7.711
evm.model.scaffold_35.941	43.47	1.928
evm.model.scaffold_35.844	47.46	4.691
evm.model.scaffold_35.403	45.2	1.091
evm.model.scaffold_35.320	43.25	3.734
evm.model.scaffold_35.145	49.14	1.822
evm.model.scaffold_35.69	53.47	5.764
evm.model.scaffold_35.667	48.39	2.065
evm.model.scaffold_35.690	50.71	3.801
evm.model.scaffold_35.864.1	51.83	1.328
evm.model.scaffold_35.171	59.36	7.455
evm.model.scaffold_35.535	53.82	3.82
evm.model.scaffold_35.674	53.9	6.982
evm.model.scaffold_35.875	49.97	2.558
evm.model.scaffold_35.682	49.48	2.277
evm.model.scaffold_35.382	53.96	1.475
evm.model.scaffold_35.673	49.05	1.614
evm.model.scaffold_35.861	45.76	9.657
evm.model.scaffold_35.849	46.38	6.064
evm.model.scaffold_35.1175	51.15	8.519
evm.model.scaffold_35.500	50.67	5.458
evm.model.scaffold_35.1044	53.66	2.439
evm.model.scaffold_35.157	46.97	5.05
evm.model.scaffold_35.253	50.8	4.013
evm.model.scaffold_35.567	51.67	2.771
evm.model.scaffold_35.1062	29.02	4.048
evm.model.scaffold_35.165	53.78	1.003
evm.model.scaffold_35.12	53.68	1.898
evm.model.scaffold_35.95	56.58	1.56
evm.model.scaffold_35.731	45.51	2.688
evm.model.scaffold_35.185	52.88	4.686
evm.model.scaffold_35.96	50.12	2.599
evm.model.scaffold_35.183	41.6	7.957
evm.model.scaffold_35.581.1	57.43	8.583
evm.model.scaffold_35.279	52.9	2.037
evm.model.scaffold_35.942	52.67	5.867
evm.model.scaffold_35.443	51.5	4.325
evm.model.scaffold_35.293	48.85	4.044
evm.model.scaffold_35.108	51.3	8.91
evm.model.scaffold_35.217.2	50.35	1.212
evm.model.scaffold_35.329	44.71	3.171
evm.model.scaffold_35.850	49.29	1.049
evm.model.scaffold_35.142	51.11	1.897
evm.model.scaffold_35.561	54.89	1.18
evm.model.scaffold_35.367	56.02	1.709
evm.model.scaffold_35.1020	53.97	5.081
evm.model.scaffold_35.66	46.19	3.614
evm.model.scaffold_35.235	57.72	7.432
evm.model.scaffold_35.284	51.88	1.506
evm.model.scaffold_35.691	38.5	3.223
evm.model.scaffold_35.79	60.92	9.195
evm.model.scaffold_35.1067	51.8	5.441
evm.model.scaffold_35.49	55.97	6.336
evm.model.scaffold_35.44	52.83	1.859
evm.model.scaffold_35.805	55.79	8.785
evm.model.scaffold_35.1114	39.53	6.497
evm.model.scaffold_35.260	35.68	2.771
evm.model.scaffold_35.919	60.92	2.607
evm.model.scaffold_35.703.1	52.81	2.194
evm.model.scaffold_35.344	55.28	1.114
evm.model.scaffold_35.675	50.39	1.856
evm.model.scaffold_35.202	55.62	1.565
evm.model.scaffold_35.348	57.46	3.125
evm.model.scaffold_35.553	61	2.302
evm.model.scaffold_35.946	52.81	9.194
evm.model.scaffold_35.874	53.34	1.281
evm.model.scaffold_35.226	49.36	9.986
evm.model.scaffold_35.319	40.33	2.979
evm.model.scaffold_35.190	54.4	6.744
evm.model.scaffold_35.745	53.27	4.046
evm.model.scaffold_35.401	51.89	1.596
evm.model.scaffold_35.371	53.96	8.82
evm.model.scaffold_35.788	53.66	9.89
evm.model.scaffold_35.1057	46.89	8.124
evm.model.scaffold_35.210	51.74	3.73
evm.model.scaffold_35.72	51.49	7.859
evm.model.scaffold_35.1141	44.7	2.373
evm.model.scaffold_35.339	56.27	5.418
evm.model.scaffold_35.29	52.14	5.059
evm.model.scaffold_35.508	54.76	4.816
evm.model.scaffold_35.814	57.67	1.936
evm.model.scaffold_35.482	50.22	2.291
evm.model.scaffold_35.964	52.76	8.528
evm.model.scaffold_35.896	59.34	3.478
evm.model.scaffold_35.740.1	55.53	9.132
evm.model.scaffold_35.1128	51.36	5.422
evm.model.scaffold_35.161	51.89	4.117
evm.model.scaffold_35.1187	59.98	9.152
evm.model.scaffold_35.341	53.53	8.094
evm.model.scaffold_35.610	57.64	3.969
evm.model.scaffold_35.496_evm.model.scaffold_35.497	52.03	5.38
evm.model.scaffold_35.968	48.58	7.268
evm.model.scaffold_35.394	53.14	6.167
evm.model.scaffold_35.533	49.53	1.784
evm.model.scaffold_35.278.1	48.06	3.648
evm.model.scaffold_35.1188	54.86	7.18
evm.model.scaffold_35.59	48.45	1.533
evm.model.scaffold_35.60	54.78	2.677
evm.model.scaffold_35.959	52.3	3.531
evm.model.scaffold_35.264	51.66	7.758
evm.model.scaffold_35.702	54.47	4.522
evm.model.scaffold_35.546	51.72	3.316
evm.model.scaffold_35.511	49.77	8.014
evm.model.scaffold_35.334	50.8	8.838
evm.model.scaffold_35.700	50.6	8.214
evm.model.scaffold_35.577	56.01	1.33
evm.model.scaffold_35.554	59.76	1.025
evm.model.scaffold_35.1121	54.98	1.681
evm.model.scaffold_35.698	54.97	1.262
evm.model.scaffold_35.300	55.32	7.958
evm.model.scaffold_35.815.1	52.97	3.532
evm.model.scaffold_35.175	48.21	7.31
evm.model.scaffold_35.22	53.13	5.973
evm.model.scaffold_35.259	48.06	1.342
evm.model.scaffold_35.998	47.38	5.158
evm.model.scaffold_35.37	52.81	4.465
evm.model.scaffold_35.58	49.52	3.921
evm.model.scaffold_35.447	54.24	3.305
evm.model.scaffold_35.900	46.79	3.129
evm.model.scaffold_35.879	52.51	2.723
evm.model.scaffold_35.826	55.28	5.872
evm.model.scaffold_35.331	58.59	6.403
evm.model.scaffold_35.126.1	48.42	6.377
evm.model.scaffold_35.460	54.45	4.028
evm.model.scaffold_35.1018	52.83	3.405
evm.model.scaffold_35.628	51.95	3.882
evm.model.scaffold_35.789.1	53.77	8.502
evm.model.scaffold_35.830	59.12	8.87
evm.model.scaffold_35.412	55.17	8.388
evm.model.scaffold_35.387	56.11	1.382
evm.model.scaffold_35.454	51.99	4.806
evm.model.scaffold_35.484	56.66	2.36
evm.model.scaffold_35.868	43.43	1.183
evm.model.scaffold_35.915	55.74	2.778
evm.model.scaffold_35.156	49.43	3.79
evm.model.scaffold_35.930	53.87	3.496
evm.model.scaffold_35.410	44.98	2.151
evm.model.scaffold_35.1123	40.29	2.034
evm.model.scaffold_35.28	49.02	1.667
evm.model.scaffold_35.822	33.63	6.07
evm.model.scaffold_35.336_evm.model.scaffold_35.337	54.2	6.908
evm.model.scaffold_35.531	47.05	1.694
evm.model.scaffold_35.845	45.78	1.7
evm.model.scaffold_35.1011	45.03	3.388
evm.model.scaffold_35.57	52.07	1.858
evm.model.scaffold_35.898	39.54	1.694
evm.model.scaffold_35.903	47.54	8.297
evm.model.scaffold_35.583	37.01	1.768
evm.model.scaffold_35.1142	50.1	5.136
evm.model.scaffold_35.323	50.07	2.331
evm.model.scaffold_35.46	53.09	1.514
evm.model.scaffold_35.901	45.6	3.423
evm.model.scaffold_35.35.2	48.68	2.44
evm.model.scaffold_35.438	52.86	6.291
evm.model.scaffold_35.280	52.96	1.492
evm.model.scaffold_35.829	54.65	2.939
evm.model.scaffold_35.455	61	3.546
evm.model.scaffold_35.232	47.08	2.936
evm.model.scaffold_35.1190	55.5	7.049
evm.model.scaffold_35.869	56.72	6.864
evm.model.scaffold_35.739	49.51	7.929
evm.model.scaffold_35.1186	49.63	6.579
evm.model.scaffold_35.1098	45.01	3.806
evm.model.scaffold_35.1135	57.13	1.682
evm.model.scaffold_35.538	57.57	8.446
evm.model.scaffold_35.153	51.41	5.865
evm.model.scaffold_35.877	56.14	9.179
evm.model.scaffold_35.374	52.73	3.781
evm.model.scaffold_35.193	52.97	2.745
evm.model.scaffold_35.1043	52.36	7.27
evm.model.scaffold_35.431	58.03	1.108
evm.model.scaffold_35.1097	52.47	3.598
evm.model.scaffold_35.229	51.56	2.169
evm.model.scaffold_35.211	52.18	3.91
evm.model.scaffold_35.146	41	3.376
evm.model.scaffold_35.940	57.98	6.751
evm.model.scaffold_35.452.1	48.49	8.561
evm.model.scaffold_35.609	33.51	1.884
evm.model.scaffold_35.265	49.51	2.051
evm.model.scaffold_35.203	52.57	2.603
evm.model.scaffold_35.727	54.83	4.111
evm.model.scaffold_35.990	51.43	2.374
evm.model.scaffold_35.736	54.46	2.393
evm.model.scaffold_35.1010	51.37	2.594
evm.model.scaffold_35.724	42.33	6.117
evm.model.scaffold_35.1158	49.72	2.318
evm.model.scaffold_35.569	56.66	1.807
evm.model.scaffold_35.632	56.87	3.769
evm.model.scaffold_35.672	50.25	1.457
evm.model.scaffold_35.1157	56.69	2.092
evm.model.scaffold_35.324	52.77	3.393
evm.model.scaffold_35.149	58.44	1.705
evm.model.scaffold_35.912	52.41	6.601
evm.model.scaffold_35.984	49.9	7.111
evm.model.scaffold_35.1088	54.82	4.592
evm.model.scaffold_35.396	52.22	3.724
evm.model.scaffold_35.565	48.09	1.054
evm.model.scaffold_35.1167	54.7	4.523
evm.model.scaffold_35.813	49.61	2.625
evm.model.scaffold_35.741	49.62	3.16
evm.model.scaffold_35.212	55.14	1.402
evm.model.scaffold_35.435	48.12	4.426
evm.model.scaffold_35.241	47.13	1.904
evm.model.scaffold_35.596	61	8.043
evm.model.scaffold_35.483	46.41	1.339
evm.model.scaffold_35.107	49.53	3.169
evm.model.scaffold_35.505	51.72	4.769
evm.model.scaffold_35.357	51.81	3.325
evm.model.scaffold_35.532	52.68	1.668
evm.model.scaffold_35.240	49.6	4.438
evm.model.scaffold_35.654	57.8	2.201
evm.model.scaffold_35.607	36.63	4.532
evm.model.scaffold_35.376	52	2.268
evm.model.scaffold_35.191	44.07	5.091
evm.model.scaffold_35.1160	53.18	1.777
evm.model.scaffold_259.4_evm.model.scaffold_259.5	52.32	7.277
evm.model.scaffold_408.1	57.91	1.581
evm.model.scaffold_135.3	51.97	1.743
evm.model.scaffold_135.5	53.54	1.844
evm.model.scaffold_135.7	48.13	2.131
evm.model.scaffold_99.23	52.42	3.953
evm.model.scaffold_99.64	52.36	2.224
evm.model.scaffold_99.71	40.36	3.062
evm.model.scaffold_99.26	53.56	1.041
evm.model.scaffold_99.43	52.09	6.873
evm.model.scaffold_99.42	54.63	3.934
evm.model.scaffold_99.59	52.26	1.089
evm.model.scaffold_99.45	58.82	9.214
evm.model.scaffold_99.20	55.32	4.246
evm.model.scaffold_99.74	55.54	4.97
evm.model.scaffold_99.19	46.54	3.435
evm.model.scaffold_99.25	47.92	5.069
evm.model.scaffold_99.70	50.83	5.176
evm.model.scaffold_99.16	52.24	4.991
evm.model.scaffold_99.80	54.87	5.502
evm.model.scaffold_99.13	52.29	2.483
evm.model.scaffold_99.33	49.73	3.499
evm.model.scaffold_99.5	56.95	3.656
evm.model.scaffold_99.48	45.3	3.76
evm.model.scaffold_157.13	51.91	4.356
evm.model.scaffold_157.8	52	7.395
evm.model.scaffold_157.7	53.72	2.934
evm.model.scaffold_157.17	52.65	3.082
evm.model.scaffold_157.5	45.39	7.594
evm.model.scaffold_157.16	52.07	3.785
evm.model.scaffold_157.2	49.09	8.08
evm.model.scaffold_157.6	51.85	7.56
evm.model.scaffold_311.23	54.24	8.337
evm.model.scaffold_311.18	57.26	1.587
evm.model.scaffold_311.39	56.09	1.748
evm.model.scaffold_311.32	53.7	7.464
evm.model.scaffold_311.48	52.85	2.45
evm.model.scaffold_311.40	55.9	1.731
evm.model.scaffold_311.15	46.1	3.314
evm.model.scaffold_311.38	48.2	6.691
evm.model.scaffold_311.36	53.34	2.268
evm.model.scaffold_311.30	47.29	5.236
evm.model.scaffold_311.28	50.41	2.924
evm.model.scaffold_311.31	52.54	5.073
evm.model.scaffold_311.19	52.37	4.116
evm.model.scaffold_311.45	54.87	1.603
evm.model.scaffold_311.2	48.93	2.088
evm.model.scaffold_311.16	54.98	4.433
evm.model.scaffold_334.6	42.75	6.502
evm.model.scaffold_334.2	52.56	4.884
evm.model.scaffold_334.9	54.18	1.898
evm.model.scaffold_334.10	54.53	4.299
evm.model.scaffold_334.5	50.6	1.789
evm.model.scaffold_375.296	48.47	4.477
evm.model.scaffold_375.317	56.23	1.946
evm.model.scaffold_375.72	56.37	8.597
evm.model.scaffold_375.38	53.04	1.508
evm.model.scaffold_375.493	52.46	1.276
evm.model.scaffold_375.355	47.08	7.834
evm.model.scaffold_375.206	52.24	5.952
evm.model.scaffold_375.521	48.28	5.462
evm.model.scaffold_375.385	53.57	5.26
evm.model.scaffold_375.402	50.29	1.61
evm.model.scaffold_375.76	46.39	1.074
evm.model.scaffold_375.149	59.1	9.176
evm.model.scaffold_375.448	52.25	8.897
evm.model.scaffold_375.407	52.94	8.622
evm.model.scaffold_375.524	46.25	7.768
evm.model.scaffold_375.530	52.82	2.634
evm.model.scaffold_375.484	49.17	1.231
evm.model.scaffold_375.351	61	1.821
evm.model.scaffold_375.239	38.24	4.808
evm.model.scaffold_375.224	54.14	2.066
evm.model.scaffold_375.348	51.7	3.097
evm.model.scaffold_375.495	55.22	4.937
evm.model.scaffold_375.79	42.68	5.02
evm.model.scaffold_375.504	52.53	6.381
evm.model.scaffold_375.633	49.76	2.057
evm.model.scaffold_375.628	44.6	1.862
evm.model.scaffold_375.401	41.18	3.879
evm.model.scaffold_375.621	59.49	3.097
evm.model.scaffold_375.243	53.46	2.087
evm.model.scaffold_375.2	59.18	2.791
evm.model.scaffold_375.649.2	56.23	7.852
evm.model.scaffold_375.609	53.45	6.476
evm.model.scaffold_375.608	53.79	4.253
evm.model.scaffold_375.177	41.39	2.422
evm.model.scaffold_375.331	56.29	3.983
evm.model.scaffold_375.28	51.78	5.588
evm.model.scaffold_375.523	47.46	7.595
evm.model.scaffold_375.625	50.95	3.057
evm.model.scaffold_375.244	51.22	1.259
evm.model.scaffold_375.639	49.28	1.425
evm.model.scaffold_375.632	56.62	8.092
evm.model.scaffold_375.716	47.92	3.273
evm.model.scaffold_375.105	49.29	2.647
evm.model.scaffold_375.285	49.39	1.474
evm.model.scaffold_375.503	51.1	5.134
evm.model.scaffold_375.744	55.37	3.461
evm.model.scaffold_375.179	51.39	7.879
evm.model.scaffold_375.88	55.07	3.958
evm.model.scaffold_375.341.1	48.89	3.062
evm.model.scaffold_375.162	61	4.849
evm.model.scaffold_375.15	51.66	3.727
evm.model.scaffold_375.270	51.84	6.301
evm.model.scaffold_375.228	52.95	1.007
evm.model.scaffold_375.460.2	46.12	5.169
evm.model.scaffold_375.333	48.43	9.056
evm.model.scaffold_375.650	57.74	2.562
evm.model.scaffold_375.403	50.44	1.914
evm.model.scaffold_375.384	57.95	2.563
evm.model.scaffold_375.338	51.47	4.636
evm.model.scaffold_375.480	47.79	2.649
evm.model.scaffold_375.400	55.03	4.77
evm.model.scaffold_375.303.3	52.45	6.665
evm.model.scaffold_375.404	53.09	1.68
evm.model.scaffold_375.471	53.22	5.895
evm.model.scaffold_375.196	48.22	5.083
evm.model.scaffold_375.477	46.46	5.268
evm.model.scaffold_375.186	60.77	6.681
evm.model.scaffold_375.567	52	5.641
evm.model.scaffold_375.624	51.81	8.457
evm.model.scaffold_375.169	55.14	3.829
evm.model.scaffold_375.170	50.58	7.479
evm.model.scaffold_375.95	57.66	2.969
evm.model.scaffold_375.749	47.38	1.328
evm.model.scaffold_375.96	54.01	2.889
evm.model.scaffold_375.675	51.46	1.486
evm.model.scaffold_375.266	50.02	3.743
evm.model.scaffold_375.87	54.45	1.137
evm.model.scaffold_375.277	52.25	6.55
evm.model.scaffold_375.234	49.47	1.357
evm.model.scaffold_375.396	51.67	1.197
evm.model.scaffold_375.394	50.89	1.759
evm.model.scaffold_375.216.1	51.79	7.564
evm.model.scaffold_375.318	61	1.586
evm.model.scaffold_375.775	54.52	7.331
evm.model.scaffold_375.511	52.93	6.308
evm.model.scaffold_375.195	51.56	3.348
evm.model.scaffold_375.335	52.08	7.647
evm.model.scaffold_375.507	49.19	3.867
evm.model.scaffold_375.722	50.66	5.524
evm.model.scaffold_375.13	56.61	6.038
evm.model.scaffold_375.24	51.11	1.897
evm.model.scaffold_375.145	56.76	1.318
evm.model.scaffold_375.361	58.65	3.651
evm.model.scaffold_375.7	52.9	2.011
evm.model.scaffold_375.509	58.03	9.802
evm.model.scaffold_375.644	46.31	2.367
evm.model.scaffold_375.278	52.93	5.578
evm.model.scaffold_375.479	51.05	1.276
evm.model.scaffold_375.501.1	48.22	3.057
evm.model.scaffold_375.147	47.52	7.477
evm.model.scaffold_375.648	51.13	3.265
evm.model.scaffold_375.719	49.48	1.136
evm.model.scaffold_375.699	35.07	2.864
evm.model.scaffold_375.631	50.41	6.671
evm.model.scaffold_375.389	47.52	7.904
evm.model.scaffold_375.156.2	54.99	3.016
evm.model.scaffold_375.657	53.92	6.018
evm.model.scaffold_375.623	52.44	6.667
evm.model.scaffold_375.651	52.19	5.464
evm.model.scaffold_375.97	52.76	4.107
evm.model.scaffold_375.255	50.25	2.016
evm.model.scaffold_375.427	52.4	2.136
evm.model.scaffold_375.591	51.96	4.655
evm.model.scaffold_375.200	55.84	8.478
evm.model.scaffold_375.248	52.29	5.397
evm.model.scaffold_375.520	60.08	4.655
evm.model.scaffold_375.150	51.11	3.765
evm.model.scaffold_375.334	56.51	9.747
evm.model.scaffold_375.626	53.39	1.194
evm.model.scaffold_375.49	50.05	3.19
evm.model.scaffold_375.563	44.4	3.944
evm.model.scaffold_375.718	50.1	4.066
evm.model.scaffold_375.118	49.57	4.852
evm.model.scaffold_375.158	57.45	1.006
evm.model.scaffold_375.413	53.23	1.225
evm.model.scaffold_375.553	51.56	3.308
evm.model.scaffold_375.103	50.31	3.452
evm.model.scaffold_375.164	50.93	4.711
evm.model.scaffold_375.733	57.7	4.902
evm.model.scaffold_375.409	49.85	4.192
evm.model.scaffold_375.568	61	2.576
evm.model.scaffold_375.299	45.78	8.612
evm.model.scaffold_375.339	61	2.729
evm.model.scaffold_375.611	53.32	2.733
evm.model.scaffold_375.357	54.21	1.607
evm.model.scaffold_375.547_evm.model.scaffold_375.548	51.84	5.079
evm.model.scaffold_375.428	57.39	2.132
evm.model.scaffold_375.636	50.1	2.801
evm.model.scaffold_375.120	57.01	8.626
evm.model.scaffold_375.551	49.13	1.061
evm.model.scaffold_375.671	44.77	1.249
evm.model.scaffold_375.307	46.18	1.149
evm.model.scaffold_375.297	50.64	6.773
evm.model.scaffold_375.655	49.04	6.256
evm.model.scaffold_375.201	50.86	9.953
evm.model.scaffold_375.265	43.31	1.724
evm.model.scaffold_375.268	56.38	4.928
evm.model.scaffold_375.284	49.16	4.364
evm.model.scaffold_375.126	49.63	2.438
evm.model.scaffold_375.272	51.08	8.769
evm.model.scaffold_375.588	49.73	9.457
evm.model.scaffold_375.717	47.58	2.615
evm.model.scaffold_375.50	50.88	9.107
evm.model.scaffold_375.184	61	2.302
evm.model.scaffold_375.41	61	1.552
evm.model.scaffold_375.236	50.65	5.268
evm.model.scaffold_375.578	50.72	2.447
evm.model.scaffold_375.497	52.03	9.767
evm.model.scaffold_375.68	53.28	1.455
evm.model.scaffold_375.172	35.06	8.752
evm.model.scaffold_375.354	57.3	7.122
evm.model.scaffold_375.54	49.91	9.549
evm.model.scaffold_375.549	48.81	1.665
evm.model.scaffold_375.25	51.88	8.654
evm.model.scaffold_375.267	55.27	3.717
evm.model.scaffold_375.762	59.52	2.361
evm.model.scaffold_375.698	61	2.147
evm.model.scaffold_375.377	61	5.66
evm.model.scaffold_375.22	57.67	3.982
evm.model.scaffold_375.482	54.14	7.613
evm.model.scaffold_375.37	55.16	5.282
evm.model.scaffold_375.106	49.12	1.408
evm.model.scaffold_375.451	51.47	3.129
evm.model.scaffold_375.753	47.01	1.646
evm.model.scaffold_375.75	49.5	1.534
evm.model.scaffold_375.680	48.57	9.1
evm.model.scaffold_375.86	38.25	1.171
evm.model.scaffold_375.180	48.99	8.228
evm.model.scaffold_375.437	54.27	2.573
evm.model.scaffold_375.561	53.51	7.634
evm.model.scaffold_375.522	51.46	6.238
evm.model.scaffold_375.137	61	1.237
evm.model.scaffold_375.152	49.92	2.517
evm.model.scaffold_375.63	52.68	9.93
evm.model.scaffold_375.659	50.92	2.244
evm.model.scaffold_375.33.1	54.77	6.336
evm.model.scaffold_375.778	60.4	2.112
evm.model.scaffold_375.669	61	1.656
evm.model.scaffold_375.91	58.37	2.99
evm.model.scaffold_375.89	51.79	3.642
evm.model.scaffold_375.408	56.74	3.091
evm.model.scaffold_375.446	56.55	3.076
evm.model.scaffold_375.500	53.52	1.06
evm.model.scaffold_375.622	47.6	1.736
evm.model.scaffold_375.259_evm.model.scaffold_375.260	47.23	6.549
evm.model.scaffold_375.324	49.77	6.417
evm.model.scaffold_375.614	50.41	2.19
evm.model.scaffold_375.554	55.89	6.585
evm.model.scaffold_375.178	47.61	7.106
evm.model.scaffold_375.576	57.17	9.29
evm.model.scaffold_375.302	48.46	2.525
evm.model.scaffold_375.715	49.91	2.276
evm.model.scaffold_375.110	49.95	5.916
evm.model.scaffold_375.35	55.93	2.613
evm.model.scaffold_375.127	54.78	4.248
evm.model.scaffold_375.57	53.79	2.248
evm.model.scaffold_375.574	53.28	1.065
evm.model.scaffold_375.242	51.89	7.493
evm.model.scaffold_375.678	52.04	5.135
evm.model.scaffold_375.757	48.98	5.355
evm.model.scaffold_375.238	52.81	9.865
evm.model.scaffold_375.729.2	53.32	3.881
evm.model.scaffold_375.275	52.55	2.403
evm.model.scaffold_375.537	49.28	3.464
evm.model.scaffold_375.112	50.88	2.391
evm.model.scaffold_375.80	61	2.252
evm.model.scaffold_375.498	49.17	6.293
evm.model.scaffold_375.227	55.76	6.535
evm.model.scaffold_375.674.1	52.42	1.629
evm.model.scaffold_375.736	51.37	3.547
evm.model.scaffold_375.161	53.81	8.761
evm.model.scaffold_375.350	40.26	1.503
evm.model.scaffold_375.411	50.42	5.673
evm.model.scaffold_375.666	41.4	5.426
evm.model.scaffold_375.328	47.38	1.988
evm.model.scaffold_375.383	45.09	1.926
evm.model.scaffold_375.281	53.32	4.179
evm.model.scaffold_375.175	52.38	2.717
evm.model.scaffold_375.454	50.53	1.172
evm.model.scaffold_375.358	60.82	6.7
evm.model.scaffold_375.298	51.6	6.039
evm.model.scaffold_375.121	44.55	2.873
evm.model.scaffold_375.313	50.74	8.389
evm.model.scaffold_375.21	48.68	9.297
evm.model.scaffold_375.77	39.7	2.896
evm.model.scaffold_309.23	44.49	8.662
evm.model.scaffold_309.37	61	2.715
evm.model.scaffold_309.16	49.13	1.931
evm.model.scaffold_309.27_evm.model.scaffold_309.28	52.73	7.939
evm.model.scaffold_115.2	53.24	1.971
evm.model.scaffold_115.1	53.57	1.076
evm.model.scaffold_204.1	50.89	5.946
evm.model.scaffold_67.1	45.12	5.871
evm.model.scaffold_205.41	53.87	3.335
evm.model.scaffold_205.4	53.54	2.069
evm.model.scaffold_205.152	56.02	8.558
evm.model.scaffold_205.201	49.49	6.947
evm.model.scaffold_205.159	51.15	1.197
evm.model.scaffold_205.223	54.29	3.578
evm.model.scaffold_205.130	48.31	6.347
evm.model.scaffold_205.258	54.29	1.169
evm.model.scaffold_205.14	45.67	1.502
evm.model.scaffold_205.270	55.47	2.063
evm.model.scaffold_205.249	51.67	2.85
evm.model.scaffold_205.112	58.29	6.349
evm.model.scaffold_205.105	50.81	3.934
evm.model.scaffold_205.102	49.99	7.723
evm.model.scaffold_205.2	52.87	8.191
evm.model.scaffold_205.72	54.33	4.929
evm.model.scaffold_205.276	52.11	8.786
evm.model.scaffold_205.122	53.52	2.896
evm.model.scaffold_205.250	51.24	9.454
evm.model.scaffold_205.55	50.98	7.038
evm.model.scaffold_205.225	49	3.743
evm.model.scaffold_205.16	50.85	1.233
evm.model.scaffold_205.26	55.66	2.782
evm.model.scaffold_205.131	47.69	3.401
evm.model.scaffold_205.244	55.15	1.675
evm.model.scaffold_205.40	61	2.424
evm.model.scaffold_205.3	55.79	1.257
evm.model.scaffold_205.214	54.37	6.533
evm.model.scaffold_205.9	47.67	9.072
evm.model.scaffold_205.104	56.1	9.972
evm.model.scaffold_205.10	48.75	1.108
evm.model.scaffold_205.213	51.48	1.712
evm.model.scaffold_205.115	54.08	2.011
evm.model.scaffold_205.100	50.88	3.202
evm.model.scaffold_205.132	46.46	1.479
evm.model.scaffold_205.42	52.09	7.361
evm.model.scaffold_205.39	53.97	3.926
evm.model.scaffold_205.269	58.34	3.633
evm.model.scaffold_205.171	51.53	1.983
evm.model.scaffold_205.75	47.12	2.965
evm.model.scaffold_205.198	48.29	7.339
evm.model.scaffold_205.71	53.34	4.752
evm.model.scaffold_205.146	51.07	2.143
evm.model.scaffold_205.17	52.28	2.281
evm.model.scaffold_205.184	53.97	8.328
evm.model.scaffold_205.268	54.27	7.943
evm.model.scaffold_205.25	52.9	2.12
evm.model.scaffold_205.15	61	1.132
evm.model.scaffold_205.161	52.14	3.688
evm.model.scaffold_205.254	56.99	5.804
evm.model.scaffold_205.177	58.12	3.056
evm.model.scaffold_205.43	51.34	5.419
evm.model.scaffold_205.189	50.05	3.558
evm.model.scaffold_205.175	56.58	3.779
evm.model.scaffold_205.245	50.34	6.462
evm.model.scaffold_205.139	61	1.252
evm.model.scaffold_205.23	53.36	3.607
evm.model.scaffold_205.29	56.25	7.524
evm.model.scaffold_205.202	55.72	7.806
evm.model.scaffold_205.103	49.58	4.234
evm.model.scaffold_205.237	50.22	9.175
evm.model.scaffold_205.143	51.16	1.552
evm.model.scaffold_205.99	43.43	2.457
evm.model.scaffold_205.50	56.51	5.723
evm.model.scaffold_205.151	49.19	3.692
evm.model.scaffold_205.242	49.71	2.975
evm.model.scaffold_205.222	46.42	8.756
evm.model.scaffold_205.45.1	52.78	1.58
evm.model.scaffold_205.108	54.34	1.775
evm.model.scaffold_324.1	55.81	1.814
evm.model.scaffold_324.30	51.8	4.642
evm.model.scaffold_324.11	50.85	2.023
evm.model.scaffold_324.22	47.35	5.312
evm.model.scaffold_324.41	48.34	9.927
evm.model.scaffold_324.21	52.24	7.529
evm.model.scaffold_324.10	59.82	3.125
evm.model.scaffold_37.29	56.1	5.704
evm.model.scaffold_37.26	57.13	3.886
evm.model.scaffold_37.98	51.36	3.799
evm.model.scaffold_37.119	50.34	5.586
evm.model.scaffold_37.16	51.75	9.658
evm.model.scaffold_37.118	45.26	1.185
evm.model.scaffold_37.88	50.19	1.486
evm.model.scaffold_37.56	57.27	4.425
evm.model.scaffold_37.48	50.28	3.322
evm.model.scaffold_37.112	56.23	2.361
evm.model.scaffold_37.87	56.99	2.19
evm.model.scaffold_37.2	59.56	2.159
evm.model.scaffold_37.28	50.44	2.281
evm.model.scaffold_37.86	54.5	1.574
evm.model.scaffold_37.74	51.13	1.43
evm.model.scaffold_37.65	51.88	1.635
evm.model.scaffold_37.51	48.89	9.65
evm.model.scaffold_37.15	48.12	9.18
evm.model.scaffold_37.25	57.86	1.47
evm.model.scaffold_37.34	54.66	4.683
evm.model.scaffold_37.139.1	52.96	4.2
evm.model.scaffold_37.121	52.19	9.503
evm.model.scaffold_37.103	50.22	6.346
evm.model.scaffold_37.113	51.55	2.217
evm.model.scaffold_37.100	49.06	2.274
evm.model.scaffold_37.89	52.95	1.529
evm.model.scaffold_37.101	54.48	6.034
evm.model.scaffold_37.27	46.26	6.068
evm.model.scaffold_37.58	51.17	6.819
evm.model.scaffold_37.1	46.78	1.315
evm.model.scaffold_37.111	47.33	1.086
evm.model.scaffold_37.23	51.66	5.391
evm.model.scaffold_37.140	48.21	4.818
evm.model.scaffold_37.130	45.86	6.206
evm.model.scaffold_37.49	47.85	2.443
evm.model.scaffold_37.57	54.32	6.307
evm.model.scaffold_37.31	52.77	7.973
evm.model.scaffold_37.93	56.51	6.811
evm.model.scaffold_37.50	52.22	2.074
evm.model.scaffold_37.97	59.76	2.263
evm.model.scaffold_37.133	56.92	6.451
evm.model.scaffold_37.134	56.57	6.375
evm.model.scaffold_21.2	57.51	1.269
evm.model.scaffold_21.26	52.5	5.857
evm.model.scaffold_21.43	49.92	1.183
evm.model.scaffold_21.16	51.5	3.899
evm.model.scaffold_21.65	48.06	1.263
evm.model.scaffold_21.29	52.15	5.094
evm.model.scaffold_21.57	48.23	4.44
evm.model.scaffold_21.55	53.53	3.374
evm.model.scaffold_21.62	52.19	6.17
evm.model.scaffold_21.67	54.52	1.118
evm.model.scaffold_21.75	54.63	1.127
evm.model.scaffold_21.20	50.65	6.15
evm.model.scaffold_21.40	50.33	4.348
evm.model.scaffold_21.56	52.9	3.048
evm.model.scaffold_21.48	48.56	2.652
evm.model.scaffold_21.61	55.95	9.457
evm.model.scaffold_21.15	55.79	3.751
evm.model.scaffold_21.14	57.8	4.392
evm.model.scaffold_12.283	56.23	4.156
evm.model.scaffold_12.136	49.05	8.045
evm.model.scaffold_12.302	48.75	5.701
evm.model.scaffold_12.151	55.61	1.069
evm.model.scaffold_12.218	42.04	5.991
evm.model.scaffold_12.178	51.86	9.862
evm.model.scaffold_12.63	46.74	5.035
evm.model.scaffold_12.239	61	1.258
evm.model.scaffold_12.235	59.86	1.76
evm.model.scaffold_12.88	42.76	5.305
evm.model.scaffold_12.153	52.56	1.296
evm.model.scaffold_12.122	52.62	3.431
evm.model.scaffold_12.183	53.72	8.91
evm.model.scaffold_12.30	51.8	5.103
evm.model.scaffold_12.85	52.11	4.256
evm.model.scaffold_12.143	49.09	1.32
evm.model.scaffold_12.57	51.1	1.09
evm.model.scaffold_12.203	55.78	6.727
evm.model.scaffold_12.269	46.29	1.613
evm.model.scaffold_12.47	50.55	3.773
evm.model.scaffold_12.138	44.46	6.007
evm.model.scaffold_12.277	50.54	3.078
evm.model.scaffold_12.317	57.51	2.016
evm.model.scaffold_12.108	61	3.038
evm.model.scaffold_12.118	48.82	1.763
evm.model.scaffold_12.132	45.18	2.035
evm.model.scaffold_12.207	55.82	7.524
evm.model.scaffold_12.62	48.55	9.957
evm.model.scaffold_12.190	49.28	1.33
evm.model.scaffold_12.214	61	1.126
evm.model.scaffold_12.305	53.76	4.048
evm.model.scaffold_12.107	38.14	3.08
evm.model.scaffold_12.39	55.68	1.049
evm.model.scaffold_12.260	59.82	2.382
evm.model.scaffold_12.217.2	56.26	9.758
evm.model.scaffold_12.2	49.28	1.031
evm.model.scaffold_12.37	52.75	1.118
evm.model.scaffold_12.135	42.75	8.244
evm.model.scaffold_12.188	52.32	4.089
evm.model.scaffold_12.189	50.18	2.776
evm.model.scaffold_12.154	52.1	6.062
evm.model.scaffold_12.199	58.85	3.71
evm.model.scaffold_12.267	51.75	1.684
evm.model.scaffold_12.141	55.98	1.635
evm.model.scaffold_12.311	55.89	2.369
evm.model.scaffold_12.176	52.54	1.274
evm.model.scaffold_12.120	50.21	1.131
evm.model.scaffold_12.142.1	61	8.34
evm.model.scaffold_12.234	53.17	2.196
evm.model.scaffold_12.300	52.84	3.765
evm.model.scaffold_12.301	45.12	2.432
evm.model.scaffold_12.216	58.41	3.608
evm.model.scaffold_12.313	56.24	9.359
evm.model.scaffold_12.84	50.23	8.922
evm.model.scaffold_12.65	48.01	7.301
evm.model.scaffold_12.98	53.32	6.583
evm.model.scaffold_12.206	51.8	9.543
evm.model.scaffold_12.213	49.73	2.709
evm.model.scaffold_12.3	52.26	4.624
evm.model.scaffold_12.168	42.85	1.459
evm.model.scaffold_12.83	53.54	5.634
evm.model.scaffold_12.296	45.92	5.496
evm.model.scaffold_12.299	58.87	2.144
evm.model.scaffold_12.82	56.56	5.885
evm.model.scaffold_12.319	48.78	2.152
evm.model.scaffold_12.316	45.68	1.197
evm.model.scaffold_12.295.2	56.74	6.571
evm.model.scaffold_176.263	51.17	4.232
evm.model.scaffold_176.147	54.34	2.383
evm.model.scaffold_176.247	51.53	1.861
evm.model.scaffold_176.273	55.85	6.54
evm.model.scaffold_176.257	61	1.229
evm.model.scaffold_176.236	48.98	3.525
evm.model.scaffold_176.177	51.89	5.275
evm.model.scaffold_176.288	56.25	3.293
evm.model.scaffold_176.326	54.13	1.55
evm.model.scaffold_176.55	50.98	2.4
evm.model.scaffold_176.57	50.64	1.479
evm.model.scaffold_176.159	48.3	2.949
evm.model.scaffold_176.336	47.98	2.484
evm.model.scaffold_176.37	51.53	5.554
evm.model.scaffold_176.68	44.8	2.367
evm.model.scaffold_176.146	36.49	1.79
evm.model.scaffold_176.67	52.78	3.266
evm.model.scaffold_176.167	50.88	8.145
evm.model.scaffold_176.185	58.57	2.882
evm.model.scaffold_176.198	56.85	6.085
evm.model.scaffold_176.306	57.08	1.192
evm.model.scaffold_176.249	40.44	2.441
evm.model.scaffold_176.20	51.67	3.742
evm.model.scaffold_176.222	51.56	2.236
evm.model.scaffold_176.179	46.96	1.292
evm.model.scaffold_176.33	43.52	4.5
evm.model.scaffold_176.303	48.97	3.199
evm.model.scaffold_176.259	50.56	1.515
evm.model.scaffold_176.109	61	3.314
evm.model.scaffold_176.229	53.43	6.765
evm.model.scaffold_176.225	47.67	1.809
evm.model.scaffold_176.286	59.24	4.142
evm.model.scaffold_176.84	54.13	9.681
evm.model.scaffold_176.274	50.5	3.325
evm.model.scaffold_176.41	51.98	8.355
evm.model.scaffold_176.71	51.67	1.507
evm.model.scaffold_176.21	47.24	9.34
evm.model.scaffold_176.102	48.81	9.561
evm.model.scaffold_176.108	51.15	5.99
evm.model.scaffold_176.283	52.83	3.208
evm.model.scaffold_176.119	57.22	1.277
evm.model.scaffold_176.294	54.15	3.526
evm.model.scaffold_176.215	51.49	3.093
evm.model.scaffold_176.201	50.39	6.771
evm.model.scaffold_176.30	53.87	1.706
evm.model.scaffold_176.258	53.08	1.414
evm.model.scaffold_176.244	51.14	6.372
evm.model.scaffold_176.11	51.99	2.026
evm.model.scaffold_176.115	52.72	7.196
evm.model.scaffold_176.227	51.97	4.059
evm.model.scaffold_176.300	48.03	4.62
evm.model.scaffold_176.31	47.89	2.303
evm.model.scaffold_176.154	56.41	5.497
evm.model.scaffold_176.26	61	1.295
evm.model.scaffold_176.174	49.67	1.239
evm.model.scaffold_176.107	42.2	1.535
evm.model.scaffold_176.9	52.43	1.14
evm.model.scaffold_176.209	51.63	2.086
evm.model.scaffold_176.253	52.73	1.865
evm.model.scaffold_176.166	51.07	1.609
evm.model.scaffold_176.38	48.6	3.053
evm.model.scaffold_176.256	54.4	1.355
evm.model.scaffold_176.271	54.26	9.656
evm.model.scaffold_176.197	54.61	3.799
evm.model.scaffold_176.251	54.57	1.335
evm.model.scaffold_176.223	56.08	2.899
evm.model.scaffold_176.128	52.16	9.195
evm.model.scaffold_176.308	52.82	9.194
evm.model.scaffold_176.91	52.96	2.741
evm.model.scaffold_176.237	53.68	1.781
evm.model.scaffold_176.182	61	8.105
evm.model.scaffold_176.321	53.63	4.128
evm.model.scaffold_176.158.1	53.37	8.039
evm.model.scaffold_176.312	51.71	8.484
evm.model.scaffold_176.168	53.34	7.738
evm.model.scaffold_176.150	52.01	3.031
evm.model.scaffold_176.14.1	55.71	3.185
evm.model.scaffold_176.105.3	55.2	5.425
evm.model.scaffold_176.145	45.79	1.527
evm.model.scaffold_176.302	44.54	2.065
evm.model.scaffold_176.248	57.58	1.605
evm.model.scaffold_176.58	48.88	2.264
evm.model.scaffold_441.2	53.71	2.13
evm.model.scaffold_41.51	46.95	5.214
evm.model.scaffold_41.47	53.42	4.337
evm.model.scaffold_41.13	43.32	5.867
evm.model.scaffold_41.11	50.03	2.051
evm.model.scaffold_41.32	50.75	5.451
evm.model.scaffold_41.31	49.96	2.465
evm.model.scaffold_41.40	55.59	7.476
evm.model.scaffold_41.33	61	3.961
evm.model.scaffold_41.12	50.72	4.027
evm.model.scaffold_60.61	56.82	4.119
evm.model.scaffold_60.18	49.16	3.013
evm.model.scaffold_60.43	45.84	3.096
evm.model.scaffold_60.22	51.54	9.227
evm.model.scaffold_60.17	56.19	9.712
evm.model.scaffold_60.49	57.88	9.355
evm.model.scaffold_60.23	49.32	2.338
evm.model.scaffold_60.47	52.56	3.776
evm.model.scaffold_60.13	51.41	4.601
evm.model.scaffold_60.38	45.98	8.806
evm.model.scaffold_60.4	51.62	4.759
evm.model.scaffold_60.42	48.48	4.619
evm.model.scaffold_60.52	54.92	9.272
evm.model.scaffold_168.8	50.86	5.765
evm.model.scaffold_168.23	51.26	5.486
evm.model.scaffold_168.35	53.39	2.578
evm.model.scaffold_168.51	48.25	7.198
evm.model.scaffold_168.4	53.82	3.524
evm.model.scaffold_168.19	43.18	2.804
evm.model.scaffold_168.48.1	51.27	1.522
evm.model.scaffold_168.39	53.02	2.345
evm.model.scaffold_168.9	56.78	7.896
evm.model.scaffold_168.5	52.78	2.616
evm.model.scaffold_168.30	52.34	1.966
evm.model.scaffold_168.43	52.65	5.435
evm.model.scaffold_265.1	49.49	3.059
evm.model.scaffold_270.3	50.69	2.141
evm.model.scaffold_116.2	54.11	4.411
evm.model.scaffold_116.4	46.15	1.552
evm.model.scaffold_116.6	54.9	9.273
evm.model.scaffold_116.5	54.12	5.424
evm.model.scaffold_100.229	48.67	2.994
evm.model.scaffold_100.943	56.27	7.795
evm.model.scaffold_100.575	56.48	1.359
evm.model.scaffold_100.1775	55.43	9.855
evm.model.scaffold_100.1101	50.16	1.862
evm.model.scaffold_100.987	52.47	5.056
evm.model.scaffold_100.528	50.77	8.335
evm.model.scaffold_100.1014	55.37	1.806
evm.model.scaffold_100.1120	54.8	6.263
evm.model.scaffold_100.1366	46.83	4.807
evm.model.scaffold_100.1593	60.86	3.75
evm.model.scaffold_100.1201	47.05	2.967
evm.model.scaffold_100.1411	53.86	2.09
evm.model.scaffold_100.1273	54.5	2.591
evm.model.scaffold_100.1510	59.55	1.785
evm.model.scaffold_100.1380	52.66	4.797
evm.model.scaffold_100.877	52.22	4.057
evm.model.scaffold_100.764	52.59	2.13
evm.model.scaffold_100.1500	53.89	2.743
evm.model.scaffold_100.793	51.45	7.16
evm.model.scaffold_100.494	50.77	7.592
evm.model.scaffold_100.769	51.75	8.079
evm.model.scaffold_100.1705	49.38	7.152
evm.model.scaffold_100.428	59.78	2.069
evm.model.scaffold_100.664	54.76	5.87
evm.model.scaffold_100.1533	52.99	3.552
evm.model.scaffold_100.1584	50.75	1.133
evm.model.scaffold_100.1131	52.52	2.349
evm.model.scaffold_100.108	51.75	2.905
evm.model.scaffold_100.284	42.37	2.932
evm.model.scaffold_100.570	51.07	5.731
evm.model.scaffold_100.961	51.47	1.372
evm.model.scaffold_100.1448	52.05	3.128
evm.model.scaffold_100.1215	52.96	8.373
evm.model.scaffold_100.1312	46.84	1.269
evm.model.scaffold_100.120	51.47	3.019
evm.model.scaffold_100.685	55.04	7.553
evm.model.scaffold_100.966	58.53	2.873
evm.model.scaffold_100.1158	48.61	1.631
evm.model.scaffold_100.477	51.5	3.739
evm.model.scaffold_100.995	50.58	4.007
evm.model.scaffold_100.1650	50.52	4.247
evm.model.scaffold_100.648	56.16	7.382
evm.model.scaffold_100.901	52.32	5.392
evm.model.scaffold_100.740	52.56	2.482
evm.model.scaffold_100.1006	49.69	5.848
evm.model.scaffold_100.689	55.38	6.931
evm.model.scaffold_100.1706	51.41	4.331
evm.model.scaffold_100.598	56.17	3.902
evm.model.scaffold_100.1329	50.16	5.308
evm.model.scaffold_100.432	45.2	2.776
evm.model.scaffold_100.431	56.71	6.619
evm.model.scaffold_100.605	52.57	3.174
evm.model.scaffold_100.766	52.95	2.865
evm.model.scaffold_100.1763	50.78	3.389
evm.model.scaffold_100.457	50.29	7.551
evm.model.scaffold_100.1620	56.86	9.215
evm.model.scaffold_100.181	54.18	1.709
evm.model.scaffold_100.411	50.24	3.248
evm.model.scaffold_100.723	56.42	2.529
evm.model.scaffold_100.479	53.93	2.708
evm.model.scaffold_100.929	53.25	8.132
evm.model.scaffold_100.1185	47.75	2.085
evm.model.scaffold_100.1050	53.13	1.081
evm.model.scaffold_100.194	57.12	4.774
evm.model.scaffold_100.2	52.86	4.795
evm.model.scaffold_100.624	56.27	4.849
evm.model.scaffold_100.1166	50.43	3.36
evm.model.scaffold_100.913	47.61	6.768
evm.model.scaffold_100.463	52.73	1.021
evm.model.scaffold_100.616	56.84	4.965
evm.model.scaffold_100.496	54.03	9.955
evm.model.scaffold_100.1688	53.98	3.74
evm.model.scaffold_100.564	51.65	6.596
evm.model.scaffold_100.291	52.53	1.688
evm.model.scaffold_100.79	53.93	1.139
evm.model.scaffold_100.1371	54.81	4.306
evm.model.scaffold_100.1065	52.5	4.106
evm.model.scaffold_100.404	60.26	1.722
evm.model.scaffold_100.1122	52.57	3.429
evm.model.scaffold_100.899	51.63	8.025
evm.model.scaffold_100.64	52.02	4.577
evm.model.scaffold_100.1464	50.16	2.763
evm.model.scaffold_100.91	53.55	3.539
evm.model.scaffold_100.1061	60.24	4.342
evm.model.scaffold_100.265	51.69	1.576
evm.model.scaffold_100.95	55.79	1.758
evm.model.scaffold_100.368	53.46	2.508
evm.model.scaffold_100.1248	41.49	9.064
evm.model.scaffold_100.1254	39.53	3.92
evm.model.scaffold_100.759.1	51.26	4.18
evm.model.scaffold_100.170	54.36	9.472
evm.model.scaffold_100.533	59.58	3.862
evm.model.scaffold_100.967	47.61	4.889
evm.model.scaffold_100.1571	54.13	3.211
evm.model.scaffold_100.1783	58.07	2.282
evm.model.scaffold_100.1646	53.55	2.824
evm.model.scaffold_100.1165	47.2	3.785
evm.model.scaffold_100.647	57.17	8.42
evm.model.scaffold_100.1645	55.15	9.642
evm.model.scaffold_100.96	44.76	1.847
evm.model.scaffold_100.898	58.41	3.307
evm.model.scaffold_100.567	57.96	6.08
evm.model.scaffold_100.566	54.5	5.78
evm.model.scaffold_100.989	54.03	7.403
evm.model.scaffold_100.1724	50.19	5.484
evm.model.scaffold_100.1509	50.99	1.777
evm.model.scaffold_100.955	57.25	2.929
evm.model.scaffold_100.931	53.77	1.603
evm.model.scaffold_100.758	51.48	2.991
evm.model.scaffold_100.938	55.12	1.853
evm.model.scaffold_100.230	53.03	8.698
evm.model.scaffold_100.131	49.88	1.093
evm.model.scaffold_100.1874	56.27	8.098
evm.model.scaffold_100.295	49.06	2.454
evm.model.scaffold_100.1392	45.76	4.438
evm.model.scaffold_100.273	57.94	2.951
evm.model.scaffold_100.1561	49.71	2.014
evm.model.scaffold_100.1292	56.47	2.375
evm.model.scaffold_100.236	56.79	1.656
evm.model.scaffold_100.37	54.52	7.127
evm.model.scaffold_100.362	48.41	2.622
evm.model.scaffold_100.190	38.83	9.987
evm.model.scaffold_100.1782	50.08	2.416
evm.model.scaffold_100.63	50.03	3.87
evm.model.scaffold_100.746	56.42	1.455
evm.model.scaffold_100.371	54.91	5.13
evm.model.scaffold_100.115	56.8	2.925
evm.model.scaffold_100.936	54.25	4.879
evm.model.scaffold_100.1217_evm.model.scaffold_100.1218	55.7	3.382
evm.model.scaffold_100.271	54.06	6.937
evm.model.scaffold_100.1884	50.64	3.249
evm.model.scaffold_100.304	38.52	5.443
evm.model.scaffold_100.542	45.5	8.968
evm.model.scaffold_100.1486	50.84	6.465
evm.model.scaffold_100.1205	49.47	8.692
evm.model.scaffold_100.1204	53.37	6.64
evm.model.scaffold_100.1299	55.07	3.257
evm.model.scaffold_100.1026	47.13	2.765
evm.model.scaffold_100.1133	54.55	1.146
evm.model.scaffold_100.211	51.34	8.989
evm.model.scaffold_100.1501	39.16	1.724
evm.model.scaffold_100.1041	54.5	4.957
evm.model.scaffold_100.1179	54.83	3.638
evm.model.scaffold_100.1849	57.4	7.092
evm.model.scaffold_100.980	53.22	3.733
evm.model.scaffold_100.682	53.94	1.538
evm.model.scaffold_100.721	55	7.218
evm.model.scaffold_100.1459	53.62	4.298
evm.model.scaffold_100.1211	53.85	4.477
evm.model.scaffold_100.1502	49.04	1.787
evm.model.scaffold_100.454	32.1	2.715
evm.model.scaffold_100.233	51.67	3.096
evm.model.scaffold_100.1189	49.94	2.083
evm.model.scaffold_100.336	53.71	2.823
evm.model.scaffold_100.288	45.74	9.839
evm.model.scaffold_100.841	53.4	2.98
evm.model.scaffold_100.1690	52.57	3.976
evm.model.scaffold_100.1644	54.9	9.493
evm.model.scaffold_100.1314.2	50.32	3.613
evm.model.scaffold_100.272	49.97	6.816
evm.model.scaffold_100.707	55.04	2.035
evm.model.scaffold_100.418	53.13	5.201
evm.model.scaffold_100.1632	56.28	4.705
evm.model.scaffold_100.640	40.08	4.093
evm.model.scaffold_100.703	49.19	3.651
evm.model.scaffold_100.255	51.14	3.743
evm.model.scaffold_100.1287	52.91	2.87
evm.model.scaffold_100.765	55.86	2.619
evm.model.scaffold_100.339.1	48.46	4.836
evm.model.scaffold_100.1110	50.94	4.114
evm.model.scaffold_100.1074	48.1	4.449
evm.model.scaffold_100.1196	52.53	8.784
evm.model.scaffold_100.561	46.4	3.214
evm.model.scaffold_100.476	61	2.902
evm.model.scaffold_100.1534	50.82	1.334
evm.model.scaffold_100.53	51.66	1.348
evm.model.scaffold_100.156	56.51	8.812
evm.model.scaffold_100.128	61	7.983
evm.model.scaffold_100.468	47.73	1.885
evm.model.scaffold_100.696	59.48	1.154
evm.model.scaffold_100.1018	44.35	4.724
evm.model.scaffold_100.1252	55.17	7.662
evm.model.scaffold_100.1265	58.55	7.918
evm.model.scaffold_100.1528	49.74	1.932
evm.model.scaffold_100.275	52.78	1.792
evm.model.scaffold_100.1261.2	55.77	5.773
evm.model.scaffold_100.266	49.38	6.612
evm.model.scaffold_100.521_evm.model.scaffold_100.522	52.97	6.519
evm.model.scaffold_100.1828	55.47	4.548
evm.model.scaffold_100.163	55.74	4.749
evm.model.scaffold_100.1761	54.4	8.163
evm.model.scaffold_100.849	46.16	4.314
evm.model.scaffold_100.625	52.24	7.919
evm.model.scaffold_100.461.1	58.06	1.531
evm.model.scaffold_100.654	57.4	1.111
evm.model.scaffold_100.1003	52.11	1.839
evm.model.scaffold_100.722.1	54.05	1.278
evm.model.scaffold_100.1727	51.84	5.305
evm.model.scaffold_100.726	49.4	1.067
evm.model.scaffold_100.988	49.21	4.263
evm.model.scaffold_100.1815	51.45	1.732
evm.model.scaffold_100.1527	49.93	1.118
evm.model.scaffold_100.1517	44.02	2.064
evm.model.scaffold_100.1797	46.54	4.85
evm.model.scaffold_100.1596	48.58	4.887
evm.model.scaffold_100.925	39.82	1.269
evm.model.scaffold_100.935	53.85	6.262
evm.model.scaffold_100.111	53.77	2.131
evm.model.scaffold_100.628	52.65	1.374
evm.model.scaffold_100.234	49.92	3.621
evm.model.scaffold_100.201	52.83	4.323
evm.model.scaffold_100.215	49.57	8.566
evm.model.scaffold_100.88	61	7.981
evm.model.scaffold_100.1811	52.51	7.082
evm.model.scaffold_100.1653	42.58	4.79
evm.model.scaffold_100.401	52.58	1.792
evm.model.scaffold_100.1151	48.72	1.868
evm.model.scaffold_100.783	52.6	2.883
evm.model.scaffold_100.135	56.14	1.335
evm.model.scaffold_100.1870	50.26	5.456
evm.model.scaffold_100.296	51.2	1.988
evm.model.scaffold_100.1583	58.06	2.101
evm.model.scaffold_100.69	55.76	3.972
evm.model.scaffold_100.1129	55.79	2.906
evm.model.scaffold_100.751	49.32	8.904
evm.model.scaffold_100.589	55.16	2.365
evm.model.scaffold_100.1660	54.09	2.627
evm.model.scaffold_100.153	52.43	5.15
evm.model.scaffold_100.515	55.42	2.532
evm.model.scaffold_100.1019	47.22	1.724
evm.model.scaffold_100.352	47.95	5.411
evm.model.scaffold_100.68	54.9	3.184
evm.model.scaffold_100.692	50.02	2.378
evm.model.scaffold_100.1592	51.04	2.727
evm.model.scaffold_100.317	42.55	4.282
evm.model.scaffold_100.1081	58.4	2.598
evm.model.scaffold_100.603	60.41	6.901
evm.model.scaffold_100.1304	51.66	5.939
evm.model.scaffold_100.102	51.99	2.036
evm.model.scaffold_100.840	52.99	8.195
evm.model.scaffold_100.1578	52.1	7.642
evm.model.scaffold_100.1892	50.58	4.518
evm.model.scaffold_100.1851.1	56.39	7.096
evm.model.scaffold_100.258	39.89	5.452
evm.model.scaffold_100.1257	51.98	2.439
evm.model.scaffold_100.1331.3	46.37	3.873
evm.model.scaffold_100.1447	47.53	2.248
evm.model.scaffold_100.595	52.31	1.693
evm.model.scaffold_100.164	54.07	1.283
evm.model.scaffold_100.307	54.85	2.012
evm.model.scaffold_100.261_evm.model.scaffold_100.262	51.37	7.589
evm.model.scaffold_100.786	58.17	7.151
evm.model.scaffold_100.354	50.07	5.348
evm.model.scaffold_100.768	52.24	2.29
evm.model.scaffold_100.850	55.32	9.15
evm.model.scaffold_100.129	55.24	4.777
evm.model.scaffold_100.545	52.74	1.783
evm.model.scaffold_100.590	52.68	1.492
evm.model.scaffold_100.319	50.51	6.163
evm.model.scaffold_100.816	48.53	4.546
evm.model.scaffold_100.1846	50.67	5.658
evm.model.scaffold_100.316	41.43	4.903
evm.model.scaffold_100.1725	57.86	3.725
evm.model.scaffold_100.822	54.07	2.71
evm.model.scaffold_100.1407	44.83	7.882
evm.model.scaffold_100.1093	52.94	1.799
evm.model.scaffold_100.1212	53.49	3.142
evm.model.scaffold_100.1816	57.65	2.599
evm.model.scaffold_100.1506	52.93	2.72
evm.model.scaffold_100.511	54.73	6.86
evm.model.scaffold_100.514	49.88	7.051
evm.model.scaffold_100.342	52.8	9.935
evm.model.scaffold_100.509	47.48	1.569
evm.model.scaffold_100.274	48.42	2.623
evm.model.scaffold_100.1182	51.28	1.672
evm.model.scaffold_100.1192	55.39	2.644
evm.model.scaffold_100.209	53.41	9.443
evm.model.scaffold_100.252	56	5.544
evm.model.scaffold_100.1598	55.05	3.116
evm.model.scaffold_100.821	51.67	3.854
evm.model.scaffold_100.1680	47.55	6.585
evm.model.scaffold_100.1569	55.71	3.924
evm.model.scaffold_100.1525	52.9	1.352
evm.model.scaffold_100.372	51.65	2.025
evm.model.scaffold_100.789	48.36	1.648
evm.model.scaffold_100.1430	44.63	1.371
evm.model.scaffold_100.239.4	54.08	6.489
evm.model.scaffold_100.1168	52.69	9.693
evm.model.scaffold_100.430	47.4	2.007
evm.model.scaffold_100.1107	54.37	6.971
evm.model.scaffold_100.1704	48.21	5.387
evm.model.scaffold_100.1353	52.35	4.816
evm.model.scaffold_100.169	41.22	6.954
evm.model.scaffold_100.179	48.13	1.202
evm.model.scaffold_100.1446	57.82	3.19
evm.model.scaffold_100.58	56.32	4.956
evm.model.scaffold_100.1902	53.51	3.598
evm.model.scaffold_100.213	43.92	1.429
evm.model.scaffold_100.1056	53.14	4.583
evm.model.scaffold_100.879	50.44	6.658
evm.model.scaffold_100.189	46.68	6.206
evm.model.scaffold_100.1535	58.08	6.249
evm.model.scaffold_100.329	50.43	1.807
evm.model.scaffold_100.728	56.9	3.761
evm.model.scaffold_100.1410	50.67	4.275
evm.model.scaffold_100.1590	50.85	7.053
evm.model.scaffold_100.28	47.75	6.493
evm.model.scaffold_100.1739	54.08	8.653
evm.model.scaffold_100.523	52.46	6.61
evm.model.scaffold_100.324	58.15	5.791
evm.model.scaffold_100.1097	46.25	8.064
evm.model.scaffold_100.1405	46.79	1.248
evm.model.scaffold_100.587	61	8.608
evm.model.scaffold_100.1475	51.01	3.423
evm.model.scaffold_100.581	47.49	1.731
evm.model.scaffold_100.422	48.63	5.482
evm.model.scaffold_100.997	46.77	1.706
evm.model.scaffold_100.247	48.01	1.082
evm.model.scaffold_100.398	42.99	7.622
evm.model.scaffold_100.426	47.55	8.003
evm.model.scaffold_100.1549	51.56	3.203
evm.model.scaffold_100.382	60.68	8.43
evm.model.scaffold_100.1637.1	50.19	1.694
evm.model.scaffold_100.1676	43.7	1.629
evm.model.scaffold_100.806	57.16	9.599
evm.model.scaffold_100.1876	48.31	3.146
evm.model.scaffold_100.74.1	48.03	2.597
evm.model.scaffold_100.1139	53.23	4.58
evm.model.scaffold_100.854	52.13	4.593
evm.model.scaffold_100.390	51.13	2.037
evm.model.scaffold_100.752	49.81	2.33
evm.model.scaffold_100.818	58.58	1.566
evm.model.scaffold_100.1198	51.5	2.811
evm.model.scaffold_100.998	46.68	4.783
evm.model.scaffold_100.1781	50.56	5.847
evm.model.scaffold_100.620	48.95	9.396
evm.model.scaffold_100.1436	52.93	1.951
evm.model.scaffold_100.1526.1	51.41	6.909
evm.model.scaffold_100.1373	57.32	1.235
evm.model.scaffold_100.1458	56.07	3.935
evm.model.scaffold_100.870	47.37	3.23
evm.model.scaffold_100.1291	50.71	1.529
evm.model.scaffold_100.1352	53.08	8.951
evm.model.scaffold_100.1588	50.28	7.581
evm.model.scaffold_100.1311	49.67	8.831
evm.model.scaffold_100.906	50.67	1.03
evm.model.scaffold_100.214	54.65	3.056
evm.model.scaffold_100.920	55.89	9.801
evm.model.scaffold_100.902	54.69	5.554
evm.model.scaffold_100.1109	61	6.713
evm.model.scaffold_100.619	50.45	9.583
evm.model.scaffold_100.469	55.21	1.983
evm.model.scaffold_100.396	55.02	2.571
evm.model.scaffold_100.550	56.63	3.44
evm.model.scaffold_100.1678	47.39	8.049
evm.model.scaffold_100.847	48.6	1.169
evm.model.scaffold_100.1628	52.74	7.263
evm.model.scaffold_100.887	53.96	9.164
evm.model.scaffold_100.999	55.29	5.615
evm.model.scaffold_100.1579	57.56	5.3
evm.model.scaffold_100.1130	59.68	2.688
evm.model.scaffold_100.1401	53.43	1.342
evm.model.scaffold_100.89	51.29	5.896
evm.model.scaffold_100.585	53.73	3.098
evm.model.scaffold_100.162	54.4	1.309
evm.model.scaffold_100.1546	59.39	6.652
evm.model.scaffold_100.1180	50.89	9.974
evm.model.scaffold_100.812	56.08	2.221
evm.model.scaffold_100.1364	42.49	6.307
evm.model.scaffold_100.544	52.01	4.13
evm.model.scaffold_100.1258	55.08	5.583
evm.model.scaffold_100.874	55.6	1.392
evm.model.scaffold_100.250	54.06	1.843
evm.model.scaffold_100.939	49.19	4.525
evm.model.scaffold_100.659	53.2	4.651
evm.model.scaffold_100.416	54.31	8.852
evm.model.scaffold_100.855	49.76	1.679
evm.model.scaffold_100.831	57.7	4.519
evm.model.scaffold_100.313	44.2	9.248
evm.model.scaffold_100.210	51.16	1.12
evm.model.scaffold_100.919	52.41	9.373
evm.model.scaffold_100.1878	50.07	1.58
evm.model.scaffold_100.1376	50.6	1.275
evm.model.scaffold_100.1456	52.23	1.528
evm.model.scaffold_100.148	52.29	7.825
evm.model.scaffold_100.1099	57.64	2.853
evm.model.scaffold_100.305	51.53	4.802
evm.model.scaffold_100.25	43.28	1.335
evm.model.scaffold_100.1117	54.87	4.069
evm.model.scaffold_100.409	44.76	2.227
evm.model.scaffold_100.604	50.91	6.666
evm.model.scaffold_100.1319	50.14	3.373
evm.model.scaffold_100.944	47.81	1.51
evm.model.scaffold_100.1468	56.32	3.131
evm.model.scaffold_100.1266.1	53.02	3.108
evm.model.scaffold_100.455	37.58	5.172
evm.model.scaffold_100.801.1	56.16	8.158
evm.model.scaffold_100.937	38.73	2.675
evm.model.scaffold_100.1350	41.08	2.07
evm.model.scaffold_100.27	53.37	5.261
evm.model.scaffold_100.918	61	6.848
evm.model.scaffold_100.797	56.63	3.836
evm.model.scaffold_100.1587	48.8	1.837
evm.model.scaffold_100.1243	42.24	7.019
evm.model.scaffold_100.907	49.1	6.628
evm.model.scaffold_100.301	54.83	4.012
evm.model.scaffold_100.957	47.01	8.8
evm.model.scaffold_100.1780	53.32	9.125
evm.model.scaffold_100.62.1	58	6.751
evm.model.scaffold_100.834	59.09	1.233
evm.model.scaffold_100.486	53.47	7.85
evm.model.scaffold_100.790	53.72	1.621
evm.model.scaffold_100.425	45.42	1.512
evm.model.scaffold_100.795	56.58	2.748
evm.model.scaffold_100.228	44.51	6.175
evm.model.scaffold_100.1121	46.77	8.855
evm.model.scaffold_100.761	57.07	3.152
evm.model.scaffold_100.610	54.44	2.86
evm.model.scaffold_100.147	46.31	2.843
evm.model.scaffold_100.11	48.59	1.778
evm.model.scaffold_100.543	46.47	7.406
evm.model.scaffold_100.1244	54.62	8.753
evm.model.scaffold_100.241	61	4.2
evm.model.scaffold_100.1457	55.44	6.997
evm.model.scaffold_100.59	61	3.614
evm.model.scaffold_100.391	56.58	3.038
evm.model.scaffold_100.343	61	1.121
evm.model.scaffold_100.1072	48.65	8.384
evm.model.scaffold_100.959	52.79	3.307
evm.model.scaffold_100.1507	58.73	3.735
evm.model.scaffold_100.661	54.08	2.813
evm.model.scaffold_100.903	53.97	1.317
evm.model.scaffold_100.219.1	51.72	4.546
evm.model.scaffold_100.1202	50.83	5.732
evm.model.scaffold_100.1383	61	5.371
evm.model.scaffold_100.930	57.34	1.691
evm.model.scaffold_100.808	51.01	5.734
evm.model.scaffold_100.1703	44.08	1.212
evm.model.scaffold_100.109	51.63	1.873
evm.model.scaffold_100.410	40.92	3.156
evm.model.scaffold_100.1308	50.91	7.031
evm.model.scaffold_100.1552	52.93	7.447
evm.model.scaffold_100.1300	46.85	8.082
evm.model.scaffold_100.165	53.68	7.854
evm.model.scaffold_100.1210	59.34	4.769
evm.model.scaffold_100.1340	46.89	3.566
evm.model.scaffold_100.1818	46.54	3.286
evm.model.scaffold_100.84	55.02	4.045
evm.model.scaffold_100.815	53.97	5.478
evm.model.scaffold_100.1039	53.5	8.735
evm.model.scaffold_100.9	55.52	3.608
evm.model.scaffold_100.310	44.83	3.325
evm.model.scaffold_100.225	47.75	1.175
evm.model.scaffold_100.491	49.91	5.365
evm.model.scaffold_100.1134	44.55	5.182
evm.model.scaffold_100.762	55.6	2.586
evm.model.scaffold_100.429	52.04	9.974
evm.model.scaffold_100.503	57.32	4.541
evm.model.scaffold_100.35	45.69	3.726
evm.model.scaffold_100.869	54.71	4.054
evm.model.scaffold_100.132	43.67	1.81
evm.model.scaffold_100.1529	52.45	5.364
evm.model.scaffold_100.311	53.51	3.049
evm.model.scaffold_100.775	61	1.097
evm.model.scaffold_100.490	55.97	2.779
evm.model.scaffold_100.571	50.96	4.732
evm.model.scaffold_100.1051	57.74	1.208
evm.model.scaffold_100.1290	51.08	1.248
evm.model.scaffold_100.873	52.17	6.262
evm.model.scaffold_100.1830	48.82	4.675
evm.model.scaffold_100.1701	53.36	5.129
evm.model.scaffold_100.713	47.18	1.313
evm.model.scaffold_100.1363	49.05	3.511
evm.model.scaffold_100.80	54.62	1.352
evm.model.scaffold_100.1617	40	3.123
evm.model.scaffold_100.146	52	6.75
evm.model.scaffold_100.1315	54.22	7.001
evm.model.scaffold_100.1073	51.18	7.894
evm.model.scaffold_100.1119	48.12	2.331
evm.model.scaffold_100.1362	43.21	4.024
evm.model.scaffold_100.606	52.23	1.012
evm.model.scaffold_100.954	50.11	1.494
evm.model.scaffold_100.568	54.39	8.032
evm.model.scaffold_100.1140	51.73	1.945
evm.model.scaffold_100.1772_evm.model.scaffold_100.1773	54.43	5.516
evm.model.scaffold_100.1132	50.05	1.331
evm.model.scaffold_100.377	54.58	8.367
evm.model.scaffold_100.916	61	1.741
evm.model.scaffold_100.1221	54.4	8.219
evm.model.scaffold_100.1317	54.7	8.719
evm.model.scaffold_100.698	51.12	2.135
evm.model.scaffold_100.1322	54.57	9.564
evm.model.scaffold_100.1741	51.44	8.741
evm.model.scaffold_100.277	46.87	2.457
evm.model.scaffold_100.23	51.9	1.248
evm.model.scaffold_100.985	56.73	4.153
evm.model.scaffold_100.1338	45.01	6.861
evm.model.scaffold_100.427	57.04	2.077
evm.model.scaffold_100.1100	52.72	2.801
evm.model.scaffold_100.1195	55.18	2.481
evm.model.scaffold_100.256	43.97	7.449
evm.model.scaffold_100.1255	51.62	4.821
evm.model.scaffold_100.796	61	3.491
evm.model.scaffold_100.1031	53.39	8.551
evm.model.scaffold_100.1684	48.44	8.937
evm.model.scaffold_100.327	56.1	1.462
evm.model.scaffold_100.1	42.82	3.613
evm.model.scaffold_100.1213	61	2.229
evm.model.scaffold_100.767	50.87	4.337
evm.model.scaffold_100.121	55.22	4.15
evm.model.scaffold_100.1036	51.28	3.676
evm.model.scaffold_100.446	48.65	2.59
evm.model.scaffold_100.355	46.89	7.081
evm.model.scaffold_100.976_evm.model.scaffold_100.979	51.34	2.238
evm.model.scaffold_439.1	55.15	4.618
evm.model.scaffold_111.378	43.66	3.116
evm.model.scaffold_111.434	53.23	8.746
evm.model.scaffold_111.439	50.17	3.025
evm.model.scaffold_111.200	38.16	1.429
evm.model.scaffold_111.139.1	49.37	3.332
evm.model.scaffold_111.14.1	56.54	2.086
evm.model.scaffold_111.168	48.42	1.904
evm.model.scaffold_111.339	37.7	2.796
evm.model.scaffold_111.303	52.41	1.906
evm.model.scaffold_111.427	54.75	1.981
evm.model.scaffold_111.377	52	2.504
evm.model.scaffold_111.51	53.82	4.009
evm.model.scaffold_111.134	54.2	2.95
evm.model.scaffold_111.156	51.15	2.189
evm.model.scaffold_111.440	46.52	6.129
evm.model.scaffold_111.42	55.6	8.534
evm.model.scaffold_111.74	43.23	3.306
evm.model.scaffold_111.203	40.13	2.864
evm.model.scaffold_111.326	54.04	3.842
evm.model.scaffold_111.314	58.97	8.644
evm.model.scaffold_111.172	57.58	9.333
evm.model.scaffold_111.430	50.24	4.95
evm.model.scaffold_111.52	58.28	5.063
evm.model.scaffold_111.50	50.8	3.12
evm.model.scaffold_111.361	54.06	6.533
evm.model.scaffold_111.39	57.81	3.839
evm.model.scaffold_111.376	49.82	8.332
evm.model.scaffold_111.11	45.35	6.266
evm.model.scaffold_111.252	51.8	4.129
evm.model.scaffold_111.311	60.76	1.959
evm.model.scaffold_111.320	49.17	4.522
evm.model.scaffold_111.7	51.2	2.594
evm.model.scaffold_111.444	49.62	8.608
evm.model.scaffold_111.400	53.57	9.215
evm.model.scaffold_111.164.1	48.35	1.437
evm.model.scaffold_111.257	52.75	9.802
evm.model.scaffold_111.129	48.73	9.581
evm.model.scaffold_111.253	51.85	1.671
evm.model.scaffold_111.389	47.29	2.873
evm.model.scaffold_111.57	53.88	2.48
evm.model.scaffold_111.414	45.93	1.381
evm.model.scaffold_111.5	54.71	5.53
evm.model.scaffold_111.209	57.09	4.069
evm.model.scaffold_111.33	53.05	1.124
evm.model.scaffold_111.167	51.19	3.421
evm.model.scaffold_111.214	45.67	1.369
evm.model.scaffold_111.416	48.55	6.359
evm.model.scaffold_111.109	50.33	2.693
evm.model.scaffold_111.86	50.29	5.99
evm.model.scaffold_111.256	49.29	2.894
evm.model.scaffold_111.152	47.43	1.865
evm.model.scaffold_111.169	47.32	8.144
evm.model.scaffold_111.105	50.64	7.939
evm.model.scaffold_111.140	52.4	2.355
evm.model.scaffold_111.108	50.51	5.921
evm.model.scaffold_111.43	53.36	8.598
evm.model.scaffold_111.131	55.81	6.562
evm.model.scaffold_111.180	54.64	3.18
evm.model.scaffold_111.199	55.78	2.609
evm.model.scaffold_111.229.1	58.91	1.939
evm.model.scaffold_111.325	47.28	5.984
evm.model.scaffold_111.395	56.73	4.865
evm.model.scaffold_111.364	55.01	7.147
evm.model.scaffold_111.318	50.74	2.302
evm.model.scaffold_111.284	47.39	5.178
evm.model.scaffold_111.379	49.92	5.818
evm.model.scaffold_111.413	51.08	1.063
evm.model.scaffold_111.425	47.77	2.126
evm.model.scaffold_111.365	52.98	3.413
evm.model.scaffold_111.310.1	52.44	7.628
evm.model.scaffold_111.405	51.72	2.567
evm.model.scaffold_111.382	50.89	3.877
evm.model.scaffold_111.91	56.22	8.835
evm.model.scaffold_111.366	50.52	8.65
evm.model.scaffold_111.65	54.89	5.884
evm.model.scaffold_111.23	54.89	8.604
evm.model.scaffold_111.388	47.12	6.118
evm.model.scaffold_111.136	42.63	7.295
evm.model.scaffold_111.95	48.97	4.367
evm.model.scaffold_111.173	55.94	1.141
evm.model.scaffold_111.90	49.96	1.685
evm.model.scaffold_111.300	50.32	1.382
evm.model.scaffold_111.49	54.36	3.864
evm.model.scaffold_111.402	58.09	4.883
evm.model.scaffold_111.178	55.6	2.658
evm.model.scaffold_111.266	35.44	2.62
evm.model.scaffold_111.406	46.99	4.245
evm.model.scaffold_111.404	55.43	3.062
evm.model.scaffold_111.258	51.5	6.573
evm.model.scaffold_111.17	48.6	1.977
evm.model.scaffold_111.2	54.68	6.078
evm.model.scaffold_111.374	54.65	7.892
evm.model.scaffold_111.202	55.92	3.83
evm.model.scaffold_111.112	52.27	9.862
evm.model.scaffold_111.159	56.52	1.033
evm.model.scaffold_111.263	50.64	7.262
evm.model.scaffold_111.428	55.75	1.258
evm.model.scaffold_111.48	54.05	1.495
evm.model.scaffold_111.114	53.9	1.526
evm.model.scaffold_111.410	50.45	3.147
evm.model.scaffold_111.8	43.02	2.033
evm.model.scaffold_111.204	52.87	7.569
evm.model.scaffold_111.66.1	53.68	2.419
evm.model.scaffold_111.22	61	5.524
evm.model.scaffold_111.441	51.98	1.336
evm.model.scaffold_111.334	49.55	2.254
evm.model.scaffold_111.165	48.64	1.474
evm.model.scaffold_111.94	51.05	3.341
evm.model.scaffold_111.409	45.96	1.276
evm.model.scaffold_111.151	50.87	2.557
evm.model.scaffold_111.12	55.54	2.234
evm.model.scaffold_111.380	43.48	2.793
evm.model.scaffold_111.212	44.38	1.857
evm.model.scaffold_111.79.1	49	3.297
evm.model.scaffold_111.315	46.45	8.683
evm.model.scaffold_111.35	53.36	4.767
evm.model.scaffold_111.433	48.72	2.498
evm.model.scaffold_111.356	56.49	7.084
evm.model.scaffold_23.3	60.09	1.515
evm.model.scaffold_23.20	50.64	2.309
evm.model.scaffold_23.88	43.04	5.744
evm.model.scaffold_23.15	52.73	2.923
evm.model.scaffold_23.31	55.7	2.192
evm.model.scaffold_23.85	41.79	2.748
evm.model.scaffold_23.96	58.11	1.66
evm.model.scaffold_23.41	52.9	7.056
evm.model.scaffold_23.13	55.35	5.574
evm.model.scaffold_23.1	36.84	2.335
evm.model.scaffold_23.14	49.46	6.433
evm.model.scaffold_23.107	49.18	3.322
evm.model.scaffold_23.56	50.46	4.512
evm.model.scaffold_23.91	53.42	2.957
evm.model.scaffold_23.102	52.44	3.363
evm.model.scaffold_23.53	51.56	2.457
evm.model.scaffold_23.10	56.14	1.874
evm.model.scaffold_23.104.2	52.17	5.075
evm.model.scaffold_23.11	52.7	7.221
evm.model.scaffold_23.94	47.77	6.103
evm.model.scaffold_23.47	51.71	8.69
evm.model.scaffold_23.27	52.77	1.284
evm.model.scaffold_23.4	41.85	5.172
evm.model.scaffold_23.106	55.74	1.939
evm.model.scaffold_335.15.1	50.72	2.293
evm.model.scaffold_335.14	47.35	2.43
evm.model.scaffold_335.38	52.27	5.723
evm.model.scaffold_335.31	52.64	1.634
evm.model.scaffold_335.44	53.56	5.681
evm.model.scaffold_335.37	49.06	8.118
evm.model.scaffold_335.36	47.24	9.781
evm.model.scaffold_335.29	61	5.517
evm.model.scaffold_335.33	51.28	4.682
evm.model.scaffold_335.45	50.6	3.686
evm.model.scaffold_335.48	47.27	6.401
evm.model.scaffold_335.35	52.02	4.841
evm.model.scaffold_335.50	48.22	1.47
evm.model.scaffold_335.2	46.35	1.149
evm.model.scaffold_218.1	49.17	3.856
evm.model.scaffold_181.14	44.19	1.643
evm.model.scaffold_181.49	53.06	4.721
evm.model.scaffold_181.30	49.01	8.582
evm.model.scaffold_181.43	54.84	2.652
evm.model.scaffold_181.35	49	1.804
evm.model.scaffold_181.54	50.21	9.127
evm.model.scaffold_181.13.1	51.33	8.473
evm.model.scaffold_181.39	61	1.554
evm.model.scaffold_181.57_evm.model.scaffold_181.58	54.75	1.437
evm.model.scaffold_181.48	51.87	3.486
evm.model.scaffold_181.61	40.35	3.078
evm.model.scaffold_181.5	48.85	3.575
evm.model.scaffold_181.41	49.59	1.058
evm.model.scaffold_181.38	50.93	4.965
evm.model.scaffold_181.51	49.22	7.66
evm.model.scaffold_181.10	55.64	2.586
evm.model.scaffold_181.29	51.27	8.148
evm.model.scaffold_181.50	55.74	8.76
evm.model.scaffold_181.40	58.61	8.938
evm.model.scaffold_181.33.1	44.77	6.051
evm.model.scaffold_6.4	43.65	5.32
evm.model.scaffold_6.6	58.62	1.146
evm.model.scaffold_6.9	61	1.396
evm.model.scaffold_150.1	52.81	1.742
evm.model.scaffold_150.2	53.46	2.729
evm.model.scaffold_150.4	48.74	3.272
evm.model.scaffold_150.3	55.59	3.431
evm.model.scaffold_31.120	52.64	1.094
evm.model.scaffold_31.76	61	1.601
evm.model.scaffold_31.122	52.49	2.961
evm.model.scaffold_31.83	57.82	4.532
evm.model.scaffold_31.50	48.03	3.374
evm.model.scaffold_31.15	52.8	7.066
evm.model.scaffold_31.16	53.74	6.49
evm.model.scaffold_31.99	50.7	7.596
evm.model.scaffold_31.113	50.12	1.624
evm.model.scaffold_31.67	53.87	9.976
evm.model.scaffold_31.49	50.49	9.382
evm.model.scaffold_31.54	54.36	9.396
evm.model.scaffold_31.45	48.38	2.42
evm.model.scaffold_31.87	54.06	9.461
evm.model.scaffold_31.61	50.49	1.521
evm.model.scaffold_31.44	46.94	1.338
evm.model.scaffold_31.48	56.61	3.754
evm.model.scaffold_31.98	51.23	1.463
evm.model.scaffold_31.105	46.81	1.943
evm.model.scaffold_31.65	55.11	1.857
evm.model.scaffold_31.3	54.9	2.125
evm.model.scaffold_160.4	46.99	2.763
evm.model.scaffold_160.10	47.99	3.541
evm.model.scaffold_421.8	51.73	1.894
evm.model.scaffold_421.11	46.77	3.89
evm.model.scaffold_421.6	52.3	1.748
evm.model.scaffold_421.2	61	2.32
evm.model.scaffold_344.3	51.44	6.727
evm.model.scaffold_122.6	48.1	3.763
evm.model.scaffold_1.23	57.1	9.614
evm.model.scaffold_1.14	54.46	3.128
evm.model.scaffold_1.35	47.32	2.984
evm.model.scaffold_1.22	51.82	3.814
evm.model.scaffold_1.43	45.7	2.896
evm.model.scaffold_3.60	53	1.756
evm.model.scaffold_3.30	53.09	5.322
evm.model.scaffold_3.33.1	59.89	1.397
evm.model.scaffold_3.47	43.11	2.458
evm.model.scaffold_3.46	53.47	7.859
evm.model.scaffold_3.28	50.94	5.38
evm.model.scaffold_3.18	59.82	4.73
evm.model.scaffold_3.67	53.33	1.333
evm.model.scaffold_3.70	52.86	2.179
evm.model.scaffold_3.19	56.39	8.005
evm.model.scaffold_3.16	51.1	4.334
evm.model.scaffold_3.27	46.18	3.631
evm.model.scaffold_3.86	45.16	9.773
evm.model.scaffold_3.5	51.78	3.131
evm.model.scaffold_3.92	47.62	2.212
evm.model.scaffold_3.64	51.3	1.58
evm.model.scaffold_3.87	52.13	7.515
evm.model.scaffold_3.7	56.51	5.93
evm.model.scaffold_3.26	61	2.698
evm.model.scaffold_3.89	51.33	9.179
evm.model.scaffold_189.20	55.94	4.687
evm.model.scaffold_189.28	51.09	3.224
evm.model.scaffold_189.6	51.35	1.884
evm.model.scaffold_189.8	40.42	2.343
evm.model.scaffold_189.78	52.4	1.635
evm.model.scaffold_189.42	52.61	4.922
evm.model.scaffold_189.117	51.69	7.422
evm.model.scaffold_189.115	36.53	1.483
evm.model.scaffold_189.95	45.11	1.297
evm.model.scaffold_189.52	60.05	1.336
evm.model.scaffold_189.103	52.04	3.501
evm.model.scaffold_189.2	47.34	3.15
evm.model.scaffold_189.102	53.09	2.41
evm.model.scaffold_189.119	45.39	3.532
evm.model.scaffold_189.57.1	52.86	6.111
evm.model.scaffold_189.108	44.78	2.586
evm.model.scaffold_189.15	53.19	3.782
evm.model.scaffold_189.53	52.44	8.748
evm.model.scaffold_189.64	52.23	4.113
evm.model.scaffold_189.23	48.78	3.034
evm.model.scaffold_189.27	47.45	2.183
evm.model.scaffold_189.17	49.39	5.818
evm.model.scaffold_189.51	50.86	2.205
evm.model.scaffold_189.94	52.97	1.371
evm.model.scaffold_189.116	53.91	4.012
evm.model.scaffold_189.41	50.4	4.384
evm.model.scaffold_189.114	57.74	7.185
evm.model.scaffold_189.7	52.37	1.851
evm.model.scaffold_189.109	33.41	1.33
evm.model.scaffold_189.124	48.51	2.735
evm.model.scaffold_189.122	47.38	1.412
evm.model.scaffold_189.25	45	7.229
evm.model.scaffold_394.3	61	9.018
evm.model.scaffold_394.542	54.93	4.362
evm.model.scaffold_394.14	42.13	5.298
evm.model.scaffold_394.313	48.68	7.196
evm.model.scaffold_394.538	44.31	9.318
evm.model.scaffold_394.469	54.08	2.668
evm.model.scaffold_394.323	54.73	1.516
evm.model.scaffold_394.293	47.25	6.068
evm.model.scaffold_394.325	46.59	3.657
evm.model.scaffold_394.419	52.98	4.381
evm.model.scaffold_394.509	51.83	5.581
evm.model.scaffold_394.215.3	56.76	5.632
evm.model.scaffold_394.229	52.56	5.873
evm.model.scaffold_394.356	55.94	7.365
evm.model.scaffold_394.468	54.82	6.349
evm.model.scaffold_394.239	55.15	1.206
evm.model.scaffold_394.168	49.26	8.336
evm.model.scaffold_394.513	57.17	3.072
evm.model.scaffold_394.178	49.74	3.485
evm.model.scaffold_394.38	54.91	5.325
evm.model.scaffold_394.339	61	1.024
evm.model.scaffold_394.427	50.94	5.878
evm.model.scaffold_394.69	45.74	1.412
evm.model.scaffold_394.375	43.75	1.521
evm.model.scaffold_394.189	49.78	7.799
evm.model.scaffold_394.572	56.2	1.212
evm.model.scaffold_394.544	47.2	1.46
evm.model.scaffold_394.523	54.01	9.086
evm.model.scaffold_394.84.2	49.93	2.875
evm.model.scaffold_394.82	55.21	8.184
evm.model.scaffold_394.267	60.35	6.076
evm.model.scaffold_394.96	50.61	3.105
evm.model.scaffold_394.159	54.08	1.26
evm.model.scaffold_394.263	52.4	3.227
evm.model.scaffold_394.501	52.38	4.029
evm.model.scaffold_394.45	52.11	8.779
evm.model.scaffold_394.332	49.53	2.161
evm.model.scaffold_394.166.1	50.32	3.03
evm.model.scaffold_394.484.1	49.78	1.269
evm.model.scaffold_394.567	56.11	1.887
evm.model.scaffold_394.554	54.45	4.613
evm.model.scaffold_394.156	55.17	7.758
evm.model.scaffold_394.466	54.76	2.297
evm.model.scaffold_394.251	56.04	1.142
evm.model.scaffold_394.425	49.21	8.951
evm.model.scaffold_394.227	51.55	1.048
evm.model.scaffold_394.191	52.91	7.202
evm.model.scaffold_394.317	48.59	1.717
evm.model.scaffold_394.271	56.96	8.702
evm.model.scaffold_394.186	51.66	6.177
evm.model.scaffold_394.488	54.34	5.137
evm.model.scaffold_394.248	52.81	4.651
evm.model.scaffold_394.287	48.36	2.107
evm.model.scaffold_394.240	53.41	7.743
evm.model.scaffold_394.75	55.88	7.636
evm.model.scaffold_394.217	54.54	8.597
evm.model.scaffold_394.81	51.22	5.774
evm.model.scaffold_394.155	51.07	8.517
evm.model.scaffold_394.304	56.28	3.594
evm.model.scaffold_394.532	52.05	4.556
evm.model.scaffold_394.133	49.54	2.087
evm.model.scaffold_394.232	54	4.288
evm.model.scaffold_394.482	52.6	1.328
evm.model.scaffold_394.33	54.58	1.895
evm.model.scaffold_394.439	44.02	2.392
evm.model.scaffold_394.414	55.5	1.556
evm.model.scaffold_394.359	48.63	2.272
evm.model.scaffold_394.190	58.98	6.515
evm.model.scaffold_394.511	51.87	3.431
evm.model.scaffold_394.539.2	52.44	5.516
evm.model.scaffold_394.432	50.29	2.979
evm.model.scaffold_394.433	46.55	2.238
evm.model.scaffold_394.316	51.71	8.655
evm.model.scaffold_394.280	51.39	4.279
evm.model.scaffold_394.507	52.25	4.907
evm.model.scaffold_394.50	49.64	1.569
evm.model.scaffold_394.62	57.76	7.479
evm.model.scaffold_394.113	57.84	9.977
evm.model.scaffold_394.374	48.98	3.598
evm.model.scaffold_394.373	42.3	1.131
evm.model.scaffold_394.279.6	49.6	5.351
evm.model.scaffold_394.61	52.31	5.508
evm.model.scaffold_394.498	48.95	1.779
evm.model.scaffold_394.228	49.93	5.468
evm.model.scaffold_394.94	58.37	8.985
evm.model.scaffold_394.60	52.07	4.868
evm.model.scaffold_394.366	48.86	4.262
evm.model.scaffold_394.447	60.5	2.782
evm.model.scaffold_394.205	49.7	1.739
evm.model.scaffold_394.209	55.1	3.256
evm.model.scaffold_394.233	51.29	6.357
evm.model.scaffold_394.515	41.28	5.073
evm.model.scaffold_394.56	51.08	2.017
evm.model.scaffold_394.231	49.96	4.215
evm.model.scaffold_394.386	51.37	3.128
evm.model.scaffold_394.568	53.46	1.148
evm.model.scaffold_394.103	51.48	3.996
evm.model.scaffold_394.473	56.44	2.321
evm.model.scaffold_394.64	50.86	9.36
evm.model.scaffold_394.129	50.63	6.386
evm.model.scaffold_394.245	56.28	1.668
evm.model.scaffold_394.83	53.73	6.491
evm.model.scaffold_394.237_evm.model.scaffold_394.238	56.62	1.545
evm.model.scaffold_394.457	53.63	9.659
evm.model.scaffold_394.53	57.88	2.124
evm.model.scaffold_394.450	48.1	2.348
evm.model.scaffold_394.358	58.14	4.013
evm.model.scaffold_394.286	35.57	3.9
evm.model.scaffold_394.54	51.96	4.03
evm.model.scaffold_394.51	53.03	1.005
evm.model.scaffold_394.275	50.35	9.501
evm.model.scaffold_394.471	45.72	4.909
evm.model.scaffold_394.406	55.61	2.983
evm.model.scaffold_394.269	53.54	9.645
evm.model.scaffold_394.315	51.86	1.202
evm.model.scaffold_394.491	49	7.375
evm.model.scaffold_394.393	55.13	5.259
evm.model.scaffold_394.571	60.38	3.981
evm.model.scaffold_394.461	53.42	5.309
evm.model.scaffold_394.324	52.75	3.876
evm.model.scaffold_394.9	48.73	9.536
evm.model.scaffold_394.21	55	4.756
evm.model.scaffold_394.268	50.35	6.161
evm.model.scaffold_394.556	48.68	9.06
[truncated: 7,864 more rows]

## Sheet: Low-level
Gene	ENC	RPKM
evm.model.scaffold_30.62	49.01	0.42
evm.model.scaffold_30.61	52.07	0.379
evm.model.scaffold_30.89_evm.model.scaffold_30.90	50.65	0.491
evm.model.scaffold_30.79	53.65	0.796
evm.model.scaffold_30.42	50.99	0.048
evm.model.scaffold_30.92	56.59	0.05
evm.model.scaffold_30.69	54.88	0.243
evm.model.scaffold_30.63	35.94	0.652
evm.model.scaffold_185.485	51.83	0.019
evm.model.scaffold_185.548	39.21	0.083
evm.model.scaffold_185.27	52.07	0.036
evm.model.scaffold_185.225	48.7	0.221
evm.model.scaffold_185.6	58.27	0.285
evm.model.scaffold_185.144	56.66	0.864
evm.model.scaffold_185.454	50.01	0.123
evm.model.scaffold_185.279	44.57	0.787
evm.model.scaffold_185.216	51.44	0.335
evm.model.scaffold_185.99	50.38	0.368
evm.model.scaffold_185.246	47.6	0.175
evm.model.scaffold_185.481	57.99	0.495
evm.model.scaffold_185.444	55.64	0.566
evm.model.scaffold_185.451	52.7	0.644
evm.model.scaffold_185.190	53.81	0.245
evm.model.scaffold_185.538	56.04	0.036
evm.model.scaffold_185.188	61	0.101
evm.model.scaffold_185.184	53.91	0.061
evm.model.scaffold_185.107	53.42	0.18
evm.model.scaffold_185.170	49.59	0.22
evm.model.scaffold_185.187	61	0.512
evm.model.scaffold_185.460	54.91	0.684
evm.model.scaffold_185.19	50.08	0.046
evm.model.scaffold_185.364	52.74	0.308
evm.model.scaffold_185.202	44.94	0.55
evm.model.scaffold_185.358	50.97	0.276
evm.model.scaffold_185.473	51.87	0.024
evm.model.scaffold_185.272	46.23	0.018
evm.model.scaffold_185.367	48.42	0.418
evm.model.scaffold_185.532	51.01	0.699
evm.model.scaffold_185.165	52.34	0.08
evm.model.scaffold_185.270	53.93	0.185
evm.model.scaffold_185.63	50.63	0.842
evm.model.scaffold_185.369	50	0.154
evm.model.scaffold_185.14	51.76	0.038
evm.model.scaffold_185.18	56.08	0.066
evm.model.scaffold_185.351	58.58	0.058
evm.model.scaffold_185.306	49.56	0.457
evm.model.scaffold_185.233	41.82	0.029
evm.model.scaffold_185.162	48.42	0.231
evm.model.scaffold_185.40	45.53	0.351
evm.model.scaffold_185.385	37.15	0.984
evm.model.scaffold_185.547	52.46	0.013
evm.model.scaffold_185.544	53.99	0.156
evm.model.scaffold_185.124	52.34	0.687
evm.model.scaffold_185.198	50.75	0.683
evm.model.scaffold_185.92	53.81	0.1
evm.model.scaffold_185.31	49.08	0.172
evm.model.scaffold_185.143	49.32	0.492
evm.model.scaffold_185.135	57.46	0.828
evm.model.scaffold_185.432	60.9	0.369
evm.model.scaffold_185.320	58.03	0.012
evm.model.scaffold_185.256	51.76	0.272
evm.model.scaffold_185.430	49.42	0.207
evm.model.scaffold_185.185	58.97	0.017
evm.model.scaffold_185.426	45.66	0.342
evm.model.scaffold_185.266	58.02	0.839
evm.model.scaffold_185.130	53.09	0.769
evm.model.scaffold_185.166	46.83	0.021
evm.model.scaffold_185.217	52.64	0.289
evm.model.scaffold_185.431	50.46	0.01
evm.model.scaffold_185.471	59.65	0.033
evm.model.scaffold_185.155	50.85	0.467
evm.model.scaffold_185.294	53.97	0.215
evm.model.scaffold_185.95	52.72	0.039
evm.model.scaffold_185.298	45.11	0.861
evm.model.scaffold_185.234	49.09	0.127
evm.model.scaffold_185.23	54.25	0.114
evm.model.scaffold_185.11	54.21	0.012
evm.model.scaffold_185.508	49.52	0.04
evm.model.scaffold_185.171	51.85	0.984
evm.model.scaffold_185.5	51.59	0.052
evm.model.scaffold_185.419	51.62	0.052
evm.model.scaffold_185.174	52.94	0.723
evm.model.scaffold_185.399.1	52.53	0.38
evm.model.scaffold_185.418	56.95	0.031
evm.model.scaffold_287.5.1	52.37	0.506
evm.model.scaffold_287.1	57.5	0.545
evm.model.scaffold_35.1064	52.36	0.572
evm.model.scaffold_35.631	50.08	0.582
evm.model.scaffold_35.872	50.65	0.488
evm.model.scaffold_35.141	57.9	0.18
evm.model.scaffold_35.713	52.32	0.128
evm.model.scaffold_35.400	56.67	0.094
evm.model.scaffold_35.254	45.54	0.13
evm.model.scaffold_35.608	34.47	0.032
evm.model.scaffold_35.21	54.54	0.044
evm.model.scaffold_35.266	41.65	0.298
evm.model.scaffold_35.307	50.63	0.042
evm.model.scaffold_35.427	53.53	0.073
evm.model.scaffold_35.549	61	0.57
evm.model.scaffold_35.34	56.83	0.335
evm.model.scaffold_35.304	41.13	0.114
evm.model.scaffold_35.318	56.54	0.075
evm.model.scaffold_35.646	50.78	0.371
evm.model.scaffold_35.283	51.88	0.854
evm.model.scaffold_35.557	45.07	0.393
evm.model.scaffold_35.248	50.36	0.335
evm.model.scaffold_35.560	37.15	0.45
evm.model.scaffold_35.760	59.46	0.628
evm.model.scaffold_35.386	49.2	0.051
evm.model.scaffold_35.684	57.28	0.28
evm.model.scaffold_35.53	58.36	0.21
evm.model.scaffold_35.749	49.43	0.037
evm.model.scaffold_35.495	50.02	0.049
evm.model.scaffold_35.643	47.87	0.16
evm.model.scaffold_35.772	48.67	0.122
evm.model.scaffold_35.855	51.43	0.367
evm.model.scaffold_35.413.1	49.62	0.463
evm.model.scaffold_35.103	49.58	0.052
evm.model.scaffold_35.683	46.49	0.368
evm.model.scaffold_35.244	49.36	0.663
evm.model.scaffold_35.556	53.91	0.559
evm.model.scaffold_35.209	51.62	0.029
evm.model.scaffold_35.23	52.47	0.275
evm.model.scaffold_35.870	47.87	0.027
evm.model.scaffold_35.463	46.22	0.128
evm.model.scaffold_35.130.3	51.67	0.592
evm.model.scaffold_35.943	40.31	0.07
evm.model.scaffold_35.163	43.75	0.995
evm.model.scaffold_35.465	47.77	0.03
evm.model.scaffold_35.574	55.81	0.375
evm.model.scaffold_35.775	51.43	0.664
evm.model.scaffold_35.490	43.51	0.274
evm.model.scaffold_35.502	51.9	0.196
evm.model.scaffold_35.1189	46.17	0.109
evm.model.scaffold_35.13	59.7	0.902
evm.model.scaffold_35.1074	52.13	0.131
evm.model.scaffold_35.1153	40.54	0.047
evm.model.scaffold_35.525	54.81	0.046
evm.model.scaffold_35.347	54.96	0.031
evm.model.scaffold_35.481	49.59	0.107
evm.model.scaffold_35.1005	45.67	0.148
evm.model.scaffold_35.1108	54	0.204
evm.model.scaffold_35.1166	61	0.167
evm.model.scaffold_35.162	52.44	0.622
evm.model.scaffold_35.362	50.83	0.102
evm.model.scaffold_35.671	49.46	0.192
evm.model.scaffold_35.802	50.53	0.042
evm.model.scaffold_35.991	56.02	0.846
evm.model.scaffold_35.1131	53.8	0.806
evm.model.scaffold_35.786	50.12	0.733
evm.model.scaffold_35.47	56.2	0.247
evm.model.scaffold_35.1192	59.69	0.496
evm.model.scaffold_35.255	52.08	0.422
evm.model.scaffold_35.292	48.88	0.125
evm.model.scaffold_35.1127	50.05	0.438
evm.model.scaffold_35.343	53.26	0.56
evm.model.scaffold_35.590	46.63	0.125
evm.model.scaffold_35.544	51.68	0.407
evm.model.scaffold_35.379	48.06	0.048
evm.model.scaffold_35.76	51.06	0.47
evm.model.scaffold_35.780	52.74	0.163
evm.model.scaffold_35.528	51.53	0.042
evm.model.scaffold_35.187	46.94	0.491
evm.model.scaffold_35.262	52.83	0.008
evm.model.scaffold_35.1094	52.89	0.143
evm.model.scaffold_35.992	53.13	0.549
evm.model.scaffold_35.761	49.6	0.799
evm.model.scaffold_35.144	50.33	0.083
evm.model.scaffold_35.818	51.63	0.639
evm.model.scaffold_35.787	48.55	0.248
evm.model.scaffold_35.143	50.11	0.527
evm.model.scaffold_35.281	53.74	0.802
evm.model.scaffold_35.1100	42.43	0.425
evm.model.scaffold_35.622	53.65	0.063
evm.model.scaffold_35.908	52.48	0.03
evm.model.scaffold_35.450	53.99	0.798
evm.model.scaffold_35.351	50.94	0.288
evm.model.scaffold_35.568	50.97	0.058
evm.model.scaffold_35.852	55	0.745
evm.model.scaffold_35.624	54.86	0.48
evm.model.scaffold_35.15	56.67	0.098
evm.model.scaffold_35.1129	55.78	0.681
evm.model.scaffold_35.19	52.99	0.511
evm.model.scaffold_35.1130	53.63	0.261
evm.model.scaffold_35.380	60.99	0.451
evm.model.scaffold_35.653	48.59	0.097
evm.model.scaffold_35.1040	55.69	0.23
evm.model.scaffold_35.846	53.63	0.009
evm.model.scaffold_35.811	51.31	0.037
evm.model.scaffold_35.806	55.9	0.033
evm.model.scaffold_35.688	52.73	0.769
evm.model.scaffold_35.634	47.79	0.042
evm.model.scaffold_35.140	53.8	0.952
evm.model.scaffold_35.558	52.98	0.688
evm.model.scaffold_35.1165	53.9	0.772
evm.model.scaffold_35.530	53.14	0.684
evm.model.scaffold_35.359	51.78	0.069
evm.model.scaffold_35.1066	51.7	0.191
evm.model.scaffold_35.291	52.83	0.163
evm.model.scaffold_35.819	37.21	0.282
evm.model.scaffold_35.261.1	40.04	0.371
evm.model.scaffold_35.513	53.69	0.896
evm.model.scaffold_35.778	52.09	0.47
evm.model.scaffold_35.651	57.17	0.416
evm.model.scaffold_35.944	51.58	0.57
evm.model.scaffold_35.797	48.23	0.052
evm.model.scaffold_35.206	49.13	0.699
evm.model.scaffold_35.360	49.42	0.488
evm.model.scaffold_35.552	50.87	0.542
evm.model.scaffold_35.17	57.73	0.789
evm.model.scaffold_35.222	46.19	0.587
evm.model.scaffold_35.1033	52.38	0.348
evm.model.scaffold_35.827	49.18	0.048
evm.model.scaffold_35.1163	*****	0.085
evm.model.scaffold_35.895	48.31	0.301
evm.model.scaffold_35.164	47.62	0.272
evm.model.scaffold_35.247	51.75	0.022
evm.model.scaffold_35.1174	61	0.631
evm.model.scaffold_35.573	56.88	0.196
evm.model.scaffold_35.537	47.58	0.114
evm.model.scaffold_35.442	45.26	0.514
evm.model.scaffold_35.1134	51.89	0.144
evm.model.scaffold_35.196	54.35	0.017
evm.model.scaffold_35.650	47.79	0.736
evm.model.scaffold_35.221	50.21	0.265
evm.model.scaffold_35.669	54.53	0.917
evm.model.scaffold_35.863	56.76	0.072
evm.model.scaffold_35.1013	56.88	0.316
evm.model.scaffold_35.1047	58.85	0.091
evm.model.scaffold_35.856	50.34	0.194
evm.model.scaffold_35.83	49.52	0.624
evm.model.scaffold_35.501	51.65	0.014
evm.model.scaffold_35.579	55.06	0.127
evm.model.scaffold_35.1173	47.16	0.408
evm.model.scaffold_35.124	50.25	0.733
evm.model.scaffold_35.160	60.07	0.59
evm.model.scaffold_35.117	49.18	0.905
evm.model.scaffold_35.104	48.84	0.279
evm.model.scaffold_35.276	53.52	0.072
evm.model.scaffold_35.706	46.92	0.287
evm.model.scaffold_35.159	52.58	0.052
evm.model.scaffold_35.649	43.54	0.948
evm.model.scaffold_35.763	54.86	0.897
evm.model.scaffold_35.167	46.61	0.274
evm.model.scaffold_35.512	50.99	0.523
evm.model.scaffold_35.256	47.54	0.548
evm.model.scaffold_35.587	49.61	0.134
evm.model.scaffold_35.524	41.01	0.204
evm.model.scaffold_35.555	48.26	0.303
evm.model.scaffold_35.655	52.4	0.038
evm.model.scaffold_35.474	49.52	0.959
evm.model.scaffold_35.274	44.09	0.177
evm.model.scaffold_35.828	51.8	0.132
evm.model.scaffold_35.799	48.02	0.572
evm.model.scaffold_35.214	52.88	0.014
evm.model.scaffold_35.951	53.41	0.023
evm.model.scaffold_35.109	43.07	0.708
evm.model.scaffold_35.890	49.39	0.46
evm.model.scaffold_35.204	51.7	0.814
evm.model.scaffold_35.627	51.36	0.75
evm.model.scaffold_35.640	50.1	0.641
evm.model.scaffold_35.892	46.76	0.157
evm.model.scaffold_35.326	53.22	0.573
evm.model.scaffold_35.282	49.36	0.853
evm.model.scaffold_35.543	54.36	0.368
evm.model.scaffold_35.179	48.39	0.035
evm.model.scaffold_35.1162	59.93	0.15
evm.model.scaffold_35.584	58.73	0.13
evm.model.scaffold_35.424	50.83	0.535
evm.model.scaffold_35.439	46.47	0.026
evm.model.scaffold_35.619	58.55	0.295
evm.model.scaffold_35.551	61	0.585
evm.model.scaffold_35.45	50.74	0.787
evm.model.scaffold_35.237	48.24	0.849
evm.model.scaffold_35.603	49.4	0.446
evm.model.scaffold_259.2	55.24	0.262
evm.model.scaffold_408.6	40.93	0.807
evm.model.scaffold_408.5	49.38	0.043
evm.model.scaffold_408.4	49.22	0.114
evm.model.scaffold_408.3.1	46.44	0.509
evm.model.scaffold_408.2	48.49	0.04
evm.model.scaffold_135.9	50.4	0.133
evm.model.scaffold_135.1	55.65	0.887
evm.model.scaffold_135.4	53.22	0.985
evm.model.scaffold_135.11	52.21	0.033
evm.model.scaffold_135.6	50.86	0.144
evm.model.scaffold_135.8	52.94	0.505
evm.model.scaffold_135.2	46.49	0.602
evm.model.scaffold_99.39	48.48	0.424
evm.model.scaffold_99.50	57.91	0.597
evm.model.scaffold_99.52	58.74	0.208
evm.model.scaffold_99.12	53.35	0.97
evm.model.scaffold_99.68	57.96	0.77
evm.model.scaffold_99.53	55.31	0.173
evm.model.scaffold_99.18	52.59	0.224
evm.model.scaffold_99.62	57.31	0.032
evm.model.scaffold_99.63	58.18	0.164
evm.model.scaffold_99.15	53.69	0.057
evm.model.scaffold_157.9	47.4	0.321
evm.model.scaffold_157.4	47.19	0.661
evm.model.scaffold_157.10	50.32	0.527
evm.model.scaffold_311.41	45.39	0.261
evm.model.scaffold_311.34	51.74	0.36
evm.model.scaffold_311.29	55.37	0.495
evm.model.scaffold_311.49	52.85	0.921
evm.model.scaffold_311.20	55.92	0.011
evm.model.scaffold_334.1_evm.model.scaffold_334.17	55.33	0.065
evm.model.scaffold_334.3	44.01	0.191
evm.model.scaffold_375.349	51.12	0.167
evm.model.scaffold_375.712	55.71	0.154
evm.model.scaffold_375.453	40.82	0.627
evm.model.scaffold_375.769	46.82	0.048
evm.model.scaffold_375.287	52.62	0.313
evm.model.scaffold_375.300	50.21	0.205
evm.model.scaffold_375.69	51.68	0.602
evm.model.scaffold_375.764	57.62	0.268
evm.model.scaffold_375.304	38.91	0.639
evm.model.scaffold_375.720	52.95	0.133
evm.model.scaffold_375.410	53.13	0.702
evm.model.scaffold_375.474	52.89	0.438
evm.model.scaffold_375.645	52.77	0.013
evm.model.scaffold_375.555	53.05	0.019
evm.model.scaffold_375.42	51.94	0.054
evm.model.scaffold_375.26	51.73	0.388
evm.model.scaffold_375.485	58.82	0.491
evm.model.scaffold_375.11	61	0.631
evm.model.scaffold_375.684	55.97	0.763
evm.model.scaffold_375.664	55.23	0.154
evm.model.scaffold_375.476	50.85	0.021
evm.model.scaffold_375.518	51.48	0.124
evm.model.scaffold_375.108	53	0.739
evm.model.scaffold_375.241	49.68	0.657
evm.model.scaffold_375.262	53.34	0.635
evm.model.scaffold_375.129	58.87	0.494
evm.model.scaffold_375.181	59.5	0.681
evm.model.scaffold_375.192	55.93	0.043
evm.model.scaffold_375.8	53.29	0.473
evm.model.scaffold_375.4	56.7	0.076
evm.model.scaffold_375.542	58.72	0.083
evm.model.scaffold_375.580	48.85	0.401
evm.model.scaffold_375.703	55.96	0.292
evm.model.scaffold_375.415	55.86	0.025
evm.model.scaffold_375.457	56.57	0.395
evm.model.scaffold_375.173	52.68	0.278
evm.model.scaffold_375.146	53.67	0.839
evm.model.scaffold_375.550	49.99	0.036
evm.model.scaffold_375.139	58.13	0.88
evm.model.scaffold_375.132	59.5	0.017
evm.model.scaffold_375.138	52.73	0.062
evm.model.scaffold_375.183	61	0.918
evm.model.scaffold_375.582	44.98	0.474
evm.model.scaffold_375.558	56.09	0.027
evm.model.scaffold_375.777	48.47	0.073
evm.model.scaffold_375.283	61	0.226
evm.model.scaffold_375.704	48.5	0.347
evm.model.scaffold_375.564	50.22	0.088
evm.model.scaffold_375.185	58.19	0.321
evm.model.scaffold_375.781	52.04	0.14
evm.model.scaffold_375.618	54.93	0.55
evm.model.scaffold_375.734	46.95	0.184
evm.model.scaffold_375.115	58.87	0.033
evm.model.scaffold_375.392	59.31	0.074
evm.model.scaffold_375.273	56.33	0.77
evm.model.scaffold_375.602.1	53.3	0.192
evm.model.scaffold_375.533	52	0.815
evm.model.scaffold_375.737	42.88	0.683
evm.model.scaffold_375.581	50.24	0.52
evm.model.scaffold_375.67	53.66	0.208
evm.model.scaffold_375.599	54.1	0.764
evm.model.scaffold_375.780	48.87	0.338
evm.model.scaffold_375.5	54.54	0.193
evm.model.scaffold_375.327	49.99	0.138
evm.model.scaffold_375.311	56.1	0.252
evm.model.scaffold_375.616	53.86	0.515
evm.model.scaffold_375.187	56.96	0.118
evm.model.scaffold_375.148	48.37	0.077
evm.model.scaffold_375.44	46.38	0.537
evm.model.scaffold_375.23	42.69	0.72
evm.model.scaffold_375.386	53.28	0.134
evm.model.scaffold_375.430	43.96	0.807
evm.model.scaffold_375.552	48.66	0.599
evm.model.scaffold_375.346	58.29	0.176
evm.model.scaffold_375.82	49.6	0.151
evm.model.scaffold_375.461.1	49.12	0.742
evm.model.scaffold_375.438	44.74	0.055
evm.model.scaffold_375.10	56.34	0.16
evm.model.scaffold_375.257	42.18	0.072
evm.model.scaffold_375.3	49.73	0.499
evm.model.scaffold_375.673	48.99	0.017
evm.model.scaffold_375.85	46.24	0.431
evm.model.scaffold_375.665	49.14	0.548
evm.model.scaffold_375.406	47.94	0.081
evm.model.scaffold_375.579	49.26	0.602
evm.model.scaffold_375.310	57.96	0.708
evm.model.scaffold_375.439	45.68	0.157
evm.model.scaffold_375.14	51.91	0.734
evm.model.scaffold_375.379	57.81	0.842
evm.model.scaffold_375.459	49.8	0.278
evm.model.scaffold_375.329.1	51.55	0.628
evm.model.scaffold_375.66	51.19	0.013
evm.model.scaffold_375.612	52.26	0.054
evm.model.scaffold_375.546	48.2	0.031
evm.model.scaffold_375.683	55.23	0.831
evm.model.scaffold_375.374	60.24	0.256
evm.model.scaffold_375.104	59.55	0.069
evm.model.scaffold_375.78	33.27	0.538
evm.model.scaffold_375.532	53.9	0.319
evm.model.scaffold_375.226	49.51	0.852
evm.model.scaffold_375.141	52.32	0.668
evm.model.scaffold_375.59	50.33	0.125
evm.model.scaffold_375.308	48.48	0.02
evm.model.scaffold_375.613	47.12	0.992
evm.model.scaffold_375.159	53.78	0.625
evm.model.scaffold_375.514	49.91	0.243
evm.model.scaffold_375.690	51.25	0.021
evm.model.scaffold_375.464	53.4	0.764
evm.model.scaffold_375.526	55.44	0.196
evm.model.scaffold_375.577	50.63	0.449
evm.model.scaffold_375.494	47.08	0.564
evm.model.scaffold_375.81	48.59	0.326
evm.model.scaffold_375.727	53.19	0.03
evm.model.scaffold_375.368	55.1	0.096
evm.model.scaffold_375.133	55.84	0.537
evm.model.scaffold_375.610	52.05	0.138
evm.model.scaffold_375.306	52.82	0.06
evm.model.scaffold_375.640	53.06	0.64
evm.model.scaffold_375.345	47.4	0.103
evm.model.scaffold_375.378	60.46	0.423
evm.model.scaffold_375.144	61	0.554
evm.model.scaffold_375.458	46.76	0.47
evm.model.scaffold_375.742	52.81	0.888
evm.model.scaffold_375.373	54.77	0.835
evm.model.scaffold_375.723	48.89	0.356
evm.model.scaffold_375.641	52.86	0.712
evm.model.scaffold_375.541	56.71	0.022
evm.model.scaffold_375.405	56.03	0.277
evm.model.scaffold_375.508	55.73	0.098
evm.model.scaffold_375.653.1	50.29	0.212
evm.model.scaffold_375.134	50.62	0.249
evm.model.scaffold_375.214	48.02	0.117
evm.model.scaffold_375.380	50.82	0.122
evm.model.scaffold_309.6	57.31	0.029
evm.model.scaffold_309.14	61	0.69
evm.model.scaffold_309.8	51.75	0.551
evm.model.scaffold_309.2	52.5	0.028
evm.model.scaffold_309.4	46.44	0.596
evm.model.scaffold_309.12	47.84	0.415
evm.model.scaffold_204.3	49.15	0.133
evm.model.scaffold_67.3	55.9	0.025
evm.model.scaffold_67.2	45.43	0.078
evm.model.scaffold_67.5	59.62	0.386
evm.model.scaffold_205.62	43.19	0.105
evm.model.scaffold_205.82	55.55	0.77
evm.model.scaffold_205.101	50.7	0.161
evm.model.scaffold_205.69	55.49	0.183
evm.model.scaffold_205.256	48.86	0.654
evm.model.scaffold_205.215	48.97	0.812
evm.model.scaffold_205.169	50.98	0.526
evm.model.scaffold_205.204	53.88	0.033
evm.model.scaffold_205.27	50.11	0.913
evm.model.scaffold_205.60	55.38	0.024
evm.model.scaffold_205.97	50.09	0.108
evm.model.scaffold_205.158	49.39	0.705
evm.model.scaffold_205.22	40.56	0.345
evm.model.scaffold_205.24	54.22	0.435
evm.model.scaffold_205.238	55.79	0.509
evm.model.scaffold_205.209	48.73	0.567
evm.model.scaffold_205.94	42.2	0.561
evm.model.scaffold_205.157	52.95	0.652
evm.model.scaffold_205.18	56.06	0.041
evm.model.scaffold_205.253	57.88	0.766
evm.model.scaffold_205.67	42.22	0.679
evm.model.scaffold_205.267	49.54	0.042
evm.model.scaffold_205.211	49.61	0.13
evm.model.scaffold_205.12	50.32	0.626
evm.model.scaffold_205.216	55.85	0.663
evm.model.scaffold_205.203	50.51	0.343
evm.model.scaffold_205.230	46.7	0.332
evm.model.scaffold_205.81	48.23	0.016
evm.model.scaffold_205.170	47.97	0.768
evm.model.scaffold_205.37	51.61	0.421
evm.model.scaffold_205.30	49.6	0.067
evm.model.scaffold_205.5	55.59	0.527
evm.model.scaffold_205.205	50.07	0.2
evm.model.scaffold_205.144	56.06	0.104
evm.model.scaffold_205.179	50.04	0.155
evm.model.scaffold_205.35	41.8	0.154
evm.model.scaffold_205.31	49.88	0.395
evm.model.scaffold_205.65	53.9	0.098
evm.model.scaffold_205.197	56.78	0.218
evm.model.scaffold_205.121	49.66	0.095
evm.model.scaffold_476.11	55.43	0.725
evm.model.scaffold_410.2	56.74	0.711
evm.model.scaffold_324.19	49.11	0.186
evm.model.scaffold_324.38	50.12	0.124
evm.model.scaffold_324.15	49.52	0.897
evm.model.scaffold_324.25	59.1	0.084
evm.model.scaffold_324.3	53.98	0.064
evm.model.scaffold_324.20	61	0.119
evm.model.scaffold_324.27	54.53	0.635
evm.model.scaffold_37.9	53.43	0.15
evm.model.scaffold_37.30	52.13	0.033
evm.model.scaffold_37.22	47.32	0.04
evm.model.scaffold_37.73	52.03	0.245
evm.model.scaffold_37.96	51.03	0.115
evm.model.scaffold_37.142	47.3	0.05
evm.model.scaffold_37.3.4	47.39	0.169
evm.model.scaffold_37.60	50.41	0.028
evm.model.scaffold_37.136	58.93	0.154
evm.model.scaffold_37.36	46.98	0.201
evm.model.scaffold_37.108	48.75	0.367
evm.model.scaffold_37.47	50.84	0.299
evm.model.scaffold_37.120	46.18	0.726
evm.model.scaffold_21.24	51.07	0.166
evm.model.scaffold_21.50	45.75	0.578
evm.model.scaffold_21.37	49.66	0.373
evm.model.scaffold_21.49	37.71	0.382
evm.model.scaffold_21.64	49.41	0.022
evm.model.scaffold_21.45	53.33	0.128
evm.model.scaffold_21.6	46.69	0.049
evm.model.scaffold_21.68	49.09	0.197
evm.model.scaffold_21.30.1	52.33	0.486
evm.model.scaffold_21.47	47.71	0.964
evm.model.scaffold_21.3	48.83	0.715
evm.model.scaffold_21.44	56.35	0.799
evm.model.scaffold_21.7	51.86	0.149
evm.model.scaffold_21.9	50.51	0.072
evm.model.scaffold_21.5	49.45	0.074
evm.model.scaffold_21.4	55.04	0.413
evm.model.scaffold_21.73	49.11	0.14
evm.model.scaffold_21.41	51.38	0.518
evm.model.scaffold_12.99	52.07	0.327
evm.model.scaffold_12.315	53.95	0.653
evm.model.scaffold_12.202	51.28	0.819
evm.model.scaffold_12.125	61	0.746
evm.model.scaffold_12.208.1	52.66	0.341
evm.model.scaffold_12.261	34.51	0.378
evm.model.scaffold_12.195	47.98	0.612
evm.model.scaffold_12.294	49.76	0.152
evm.model.scaffold_12.209	52.43	0.093
evm.model.scaffold_12.129	54.66	0.411
evm.model.scaffold_12.290	49.95	0.173
evm.model.scaffold_12.124	35.04	0.089
evm.model.scaffold_12.22	51.86	0.1
evm.model.scaffold_12.186	50.29	0.409
evm.model.scaffold_12.29	51.97	0.497
evm.model.scaffold_12.254	43.03	0.365
evm.model.scaffold_12.48	52.54	0.078
evm.model.scaffold_12.194	56.47	0.407
evm.model.scaffold_12.73	55.32	0.994
evm.model.scaffold_12.282	55.16	0.077
evm.model.scaffold_12.286	50.96	0.98
evm.model.scaffold_12.95	54.22	0.051
evm.model.scaffold_12.68	51.22	0.537
evm.model.scaffold_12.164	53.25	0.022
evm.model.scaffold_12.312	53.05	0.641
evm.model.scaffold_12.321	49.42	0.102
evm.model.scaffold_12.106	52.47	0.279
evm.model.scaffold_12.220	59.06	0.028
evm.model.scaffold_12.117	61	0.237
evm.model.scaffold_12.259	51.45	0.587
evm.model.scaffold_12.249_evm.model.scaffold_12.250	49.56	0.237
evm.model.scaffold_12.144	45.86	0.653
evm.model.scaffold_12.133	48.35	0.058
evm.model.scaffold_12.179	48.93	0.008
evm.model.scaffold_12.123	45.42	0.043
evm.model.scaffold_12.318	53.03	0.23
evm.model.scaffold_12.81	54.33	0.176
evm.model.scaffold_12.270	48.28	0.049
evm.model.scaffold_12.128	52.09	0.016
evm.model.scaffold_12.182	46.41	0.021
evm.model.scaffold_12.247	52.09	0.09
evm.model.scaffold_12.212	51.1	0.966
evm.model.scaffold_12.185	52.92	0.744
evm.model.scaffold_12.152	54.66	0.043
evm.model.scaffold_12.67	51.66	0.485
evm.model.scaffold_12.11	56.62	0.202
evm.model.scaffold_12.245	46.71	0.665
evm.model.scaffold_12.92	45.54	0.063
evm.model.scaffold_12.211	48.36	0.957
evm.model.scaffold_12.284	50.82	0.756
evm.model.scaffold_12.210	54.78	0.805
evm.model.scaffold_12.100	53.79	0.339
evm.model.scaffold_176.155	54.52	0.867
evm.model.scaffold_176.52	54.11	0.506
evm.model.scaffold_176.293	43.59	0.784
evm.model.scaffold_176.88	51.13	0.012
evm.model.scaffold_176.137	54.78	0.443
evm.model.scaffold_176.226	49.66	0.076
evm.model.scaffold_176.13	56.44	0.221
evm.model.scaffold_176.126	51.47	0.058
evm.model.scaffold_176.219	54.57	0.022
evm.model.scaffold_176.281	49.1	0.102
evm.model.scaffold_176.59	55.72	0.346
evm.model.scaffold_176.233	56.56	0.362
evm.model.scaffold_176.250	53.67	0.044
evm.model.scaffold_176.252	51.85	0.918
evm.model.scaffold_176.50	53.64	0.235
evm.model.scaffold_176.307	31.5	0.887
evm.model.scaffold_176.65	51.88	0.203
evm.model.scaffold_176.157	49.66	0.016
evm.model.scaffold_176.106	46.47	0.364
evm.model.scaffold_176.122	56.37	0.75
evm.model.scaffold_176.19	47.28	0.47
evm.model.scaffold_176.268	50.52	0.482
evm.model.scaffold_176.183	51.84	0.555
evm.model.scaffold_176.86	52.93	0.058
evm.model.scaffold_176.207	50.37	0.013
evm.model.scaffold_176.32	49.5	0.454
evm.model.scaffold_176.152	59.99	0.066
evm.model.scaffold_176.317	49.08	0.071
evm.model.scaffold_176.217	48.67	0.245
evm.model.scaffold_176.176	45.57	0.08
evm.model.scaffold_176.292	61	0.091
evm.model.scaffold_176.97	53.22	0.468
evm.model.scaffold_176.90	46.45	0.413
evm.model.scaffold_176.121	46.81	0.038
evm.model.scaffold_176.23	49.59	0.954
evm.model.scaffold_176.270	51.02	0.111
evm.model.scaffold_176.239	54.27	0.334
evm.model.scaffold_176.160	52.29	0.543
evm.model.scaffold_176.114	48.94	0.398
evm.model.scaffold_176.206	48.09	0.008
evm.model.scaffold_176.311	42.68	0.449
evm.model.scaffold_176.153	47.31	0.278
evm.model.scaffold_176.318	54.88	0.012
evm.model.scaffold_176.82	48.64	0.934
evm.model.scaffold_176.87	51.49	0.616
evm.model.scaffold_176.29	55.48	0.277
evm.model.scaffold_176.301	50.51	0.939
evm.model.scaffold_176.191	48.62	0.822
evm.model.scaffold_176.184	47.16	0.536
evm.model.scaffold_176.136	52.44	0.222
evm.model.scaffold_176.116	45.38	0.051
evm.model.scaffold_176.254	43.58	0.335
evm.model.scaffold_176.208	47.04	0.221
evm.model.scaffold_176.93	53.03	0.614
evm.model.scaffold_176.27	54.91	0.129
evm.model.scaffold_176.255	49.87	0.815
evm.model.scaffold_176.10	53.11	0.051
evm.model.scaffold_41.37	52.79	0.103
evm.model.scaffold_41.2	45.63	0.329
evm.model.scaffold_41.10	52.43	0.038
evm.model.scaffold_60.1	59.82	0.032
evm.model.scaffold_60.58	54.42	0.442
evm.model.scaffold_60.57	51.82	0.288
evm.model.scaffold_60.7	48.84	0.039
evm.model.scaffold_168.25	51.65	0.24
evm.model.scaffold_168.20	45.57	0.564
evm.model.scaffold_168.52	51.87	0.394
evm.model.scaffold_168.32	52.79	0.086
evm.model.scaffold_168.49	52.26	0.583
evm.model.scaffold_270.2	51.13	0.275
evm.model.scaffold_116.1	29.85	0.481
evm.model.scaffold_116.3	49.57	0.19
evm.model.scaffold_100.1029	57.73	0.257
evm.model.scaffold_100.781	51.4	0.38
evm.model.scaffold_100.86	54.98	0.03
evm.model.scaffold_100.340	52.63	0.767
evm.model.scaffold_100.433	53.32	0.03
evm.model.scaffold_100.1666	52.2	0.706
evm.model.scaffold_100.694	48.27	0.639
evm.model.scaffold_100.727	61	0.254
evm.model.scaffold_100.803	58.68	0.204
evm.model.scaffold_100.448	45.55	0.356
evm.model.scaffold_100.593	50.75	0.09
evm.model.scaffold_100.243	58.77	0.085
evm.model.scaffold_100.117	52.46	0.04
evm.model.scaffold_100.1901	45.59	0.882
evm.model.scaffold_100.970	51.55	0.59
evm.model.scaffold_100.1075	48.53	0.098
evm.model.scaffold_100.1249	49.18	0.788
evm.model.scaffold_100.811	51.97	0.282
evm.model.scaffold_100.6	58.09	0.052
evm.model.scaffold_100.580	52.82	0.661
evm.model.scaffold_100.302	55.12	0.612
evm.model.scaffold_100.419	52	0.837
evm.model.scaffold_100.1040	54.61	0.044
evm.model.scaffold_100.12	45.85	0.233
evm.model.scaffold_100.123	50.77	0.744
evm.model.scaffold_100.1585	49.85	0.668
evm.model.scaffold_100.1494	41.76	0.056
evm.model.scaffold_100.1685	60.74	0.098
evm.model.scaffold_100.1386	45.91	0.29
evm.model.scaffold_100.1157	52.6	0.298
evm.model.scaffold_100.1268	56.25	0.364
evm.model.scaffold_100.844	59.9	0.871
evm.model.scaffold_100.1324	50.54	0.024
evm.model.scaffold_100.1557	47.37	0.204
evm.model.scaffold_100.1444	50	0.337
evm.model.scaffold_100.1398	54.23	0.208
evm.model.scaffold_100.1233	56.56	0.398
evm.model.scaffold_100.450	50.35	0.882
evm.model.scaffold_100.1709	51.93	0.029
evm.model.scaffold_100.549	46.28	0.413
evm.model.scaffold_100.22	49.15	0.416
evm.model.scaffold_100.1451	55.9	0.483
evm.model.scaffold_100.333	52.7	0.047
evm.model.scaffold_100.1361	45.29	0.771
evm.model.scaffold_100.1033	54.3	0.714
evm.model.scaffold_100.553	57.29	0.134
evm.model.scaffold_100.242	57.86	0.025
evm.model.scaffold_100.376	53.65	0.738
evm.model.scaffold_100.843	51.28	0.622
evm.model.scaffold_100.447	53.13	0.437
evm.model.scaffold_100.334	55.36	0.403
evm.model.scaffold_100.832	40.7	0.986
evm.model.scaffold_100.1767	53.4	0.246
evm.model.scaffold_100.1096	41.7	0.345
evm.model.scaffold_100.678	49.52	0.435
evm.model.scaffold_100.1698	53.65	0.196
evm.model.scaffold_100.1428	57.87	0.573
evm.model.scaffold_100.85	53.59	0.029
evm.model.scaffold_100.1483	49.24	0.42
evm.model.scaffold_100.893	52.7	0.017
evm.model.scaffold_100.83	39.46	0.241
evm.model.scaffold_100.1756	54.28	0.022
evm.model.scaffold_100.1367	55.27	0.82
evm.model.scaffold_100.1845	54.92	0.816
evm.model.scaffold_100.1419	49.44	0.373
evm.model.scaffold_100.927	61	0.263
evm.model.scaffold_100.1461	56.11	0.015
evm.model.scaffold_100.216	53.94	0.134
evm.model.scaffold_100.1729	55.38	0.935
evm.model.scaffold_100.1531	53.93	0.252
evm.model.scaffold_100.845	51.09	0.972
evm.model.scaffold_100.1229	58.96	0.663
evm.model.scaffold_100.1278	56.17	0.118
evm.model.scaffold_100.118	54.39	0.09
evm.model.scaffold_100.1823	51.64	0.015
evm.model.scaffold_100.1000	54.1	0.059
evm.model.scaffold_100.379	53.83	0.097
evm.model.scaffold_100.663	49.8	0.037
evm.model.scaffold_100.1429	50.78	0.853
evm.model.scaffold_100.1174	53.78	0.237
evm.model.scaffold_100.212	53.45	0.175
evm.model.scaffold_100.105	53.99	0.039
evm.model.scaffold_100.464	47.27	0.346
evm.model.scaffold_100.706	56.75	0.447
evm.model.scaffold_100.562	50.66	0.124
evm.model.scaffold_100.159	59.07	0.095
evm.model.scaffold_100.548	56.14	0.035
evm.model.scaffold_100.626	59.31	0.732
evm.model.scaffold_100.630	54.96	0.538
evm.model.scaffold_100.1476	50.43	0.154
evm.model.scaffold_100.611	54.18	0.394
evm.model.scaffold_100.1108	56.28	0.025
evm.model.scaffold_100.100	44.1	0.504
evm.model.scaffold_100.747	51.28	0.251
evm.model.scaffold_100.865	51.58	0.015
evm.model.scaffold_100.842	41.18	0.2
evm.model.scaffold_100.1651	43.55	0.354
evm.model.scaffold_100.1385	47.52	0.733
evm.model.scaffold_100.1296	51.59	0.566
evm.model.scaffold_100.172	56.97	0.597
evm.model.scaffold_100.435	51.47	0.307
evm.model.scaffold_100.1214	52.4	0.53
evm.model.scaffold_100.964	53.35	0.057
evm.model.scaffold_100.1624.1	50.24	0.013
evm.model.scaffold_100.1390	50.56	0.034
evm.model.scaffold_100.81	55.94	0.671
evm.model.scaffold_100.894	53.36	0.947
evm.model.scaffold_100.16	51.03	0.932
evm.model.scaffold_100.1246	50.79	0.19
evm.model.scaffold_100.583.1	52.85	0.714
evm.model.scaffold_100.779	56.56	0.019
evm.model.scaffold_100.1707	54.65	0.077
evm.model.scaffold_100.240	48.39	0.913
evm.model.scaffold_100.1017	50.33	0.662
evm.model.scaffold_100.646	52.24	0.321
evm.model.scaffold_100.825	58.97	0.015
evm.model.scaffold_100.1239	56.94	0.039
evm.model.scaffold_100.1541	50.72	0.2
evm.model.scaffold_100.48	49.72	0.076
evm.model.scaffold_100.1481	52.47	0.04
evm.model.scaffold_100.1519	48.33	0.284
evm.model.scaffold_100.1810	52.54	0.281
evm.model.scaffold_100.756	49.69	0.155
evm.model.scaffold_100.1427	48.3	0.319
evm.model.scaffold_100.1326	50.07	0.113
evm.model.scaffold_100.436	39.12	0.913
evm.model.scaffold_100.139	55.82	0.442
evm.model.scaffold_100.880	46.03	0.946
evm.model.scaffold_100.993	53.1	0.144
evm.model.scaffold_100.1047	55.02	0.069
evm.model.scaffold_100.478	52.66	0.62
evm.model.scaffold_100.1071	55.58	0.367
evm.model.scaffold_100.1532	54.28	0.878
evm.model.scaffold_100.735	54.42	0.465
evm.model.scaffold_100.1570	51.38	0.581
evm.model.scaffold_100.437	47.04	0.85
evm.model.scaffold_100.748	58.01	0.08
evm.model.scaffold_100.837	55.71	0.031
evm.model.scaffold_100.1647	55.21	0.634
evm.model.scaffold_100.705	52.62	0.197
evm.model.scaffold_100.141	57.02	0.686
evm.model.scaffold_100.1142	52.13	0.119
evm.model.scaffold_100.552	53.58	0.754
evm.model.scaffold_100.1894	51.17	0.058
evm.model.scaffold_100.1048	57.24	0.017
evm.model.scaffold_100.1004	50.6	0.781
evm.model.scaffold_100.1881	54.35	0.749
evm.model.scaffold_100.46	53.73	0.108
evm.model.scaffold_100.715	57.43	0.356
evm.model.scaffold_100.1145	59.3	0.137
evm.model.scaffold_100.1152	58.66	0.981
evm.model.scaffold_100.1793	55.59	0.208
evm.model.scaffold_100.819	60.97	0.345
evm.model.scaffold_100.41	48.91	0.89
evm.model.scaffold_100.1652	48.49	0.019
evm.model.scaffold_100.276	49.51	0.095
evm.model.scaffold_100.1603	50.18	0.272
evm.model.scaffold_100.1387	44.71	0.271
evm.model.scaffold_100.1057	55.41	0.525
evm.model.scaffold_100.892	50.74	0.034
evm.model.scaffold_100.592	54.43	0.112
evm.model.scaffold_100.864	54.08	0.077
evm.model.scaffold_100.914	54.5	0.637
evm.model.scaffold_100.1141	51.13	0.425
evm.model.scaffold_100.412	56.71	0.899
evm.model.scaffold_100.443	52.98	0.129
evm.model.scaffold_100.1487	47.67	0.511
evm.model.scaffold_100.991	58.14	0.204
evm.model.scaffold_100.467	49.52	0.124
evm.model.scaffold_100.246	54.62	0.668
evm.model.scaffold_100.621_evm.model.scaffold_100.622	50.74	0.352
evm.model.scaffold_100.224	36.72	0.112
evm.model.scaffold_100.962	53.29	0.111
evm.model.scaffold_100.1396	48.61	0.717
evm.model.scaffold_100.772	61	0.675
evm.model.scaffold_100.1059	54.97	0.307
evm.model.scaffold_100.788	53.98	0.852
evm.model.scaffold_100.1562	53.33	0.798
evm.model.scaffold_100.199	52.67	0.625
evm.model.scaffold_100.438	50.2	0.556
evm.model.scaffold_100.1774	55.24	0.015
evm.model.scaffold_100.167	49.6	0.009
evm.model.scaffold_100.675	50.85	0.115
evm.model.scaffold_100.405	54.29	0.65
evm.model.scaffold_100.1489	46.15	0.376
evm.model.scaffold_100.560	55.35	0.997
evm.model.scaffold_100.546	54.82	0.415
evm.model.scaffold_100.1297	48.16	0.171
evm.model.scaffold_100.1648	50.74	0.138
evm.model.scaffold_100.200	55.61	0.756
evm.model.scaffold_100.259	56.28	0.496
evm.model.scaffold_100.1482	56.49	0.474
evm.model.scaffold_100.1176	35.34	0.924
evm.model.scaffold_100.238	46.71	0.282
evm.model.scaffold_100.1336	48.68	0.504
evm.model.scaffold_100.424	47.16	0.462
evm.model.scaffold_100.1735	59.39	0.292
evm.model.scaffold_100.1649	47.16	0.026
evm.model.scaffold_100.198	52.73	0.697
evm.model.scaffold_100.1186	52.57	0.458
evm.model.scaffold_100.282	50.18	0.116
evm.model.scaffold_100.77	59.12	0.055
evm.model.scaffold_100.933	51.59	0.016
evm.model.scaffold_100.657	52.61	0.415
evm.model.scaffold_100.483	56	0.012
evm.model.scaffold_100.994	44.19	0.134
evm.model.scaffold_100.1345	51.26	0.748
evm.model.scaffold_100.1199	49.51	0.715
evm.model.scaffold_100.951	53.1	0.578
evm.model.scaffold_100.526.2	51.93	0.725
evm.model.scaffold_100.1420	48.58	0.507
evm.model.scaffold_100.32	49.22	0.71
evm.model.scaffold_100.1403	50.12	0.153
evm.model.scaffold_100.1167	55.02	0.29
evm.model.scaffold_100.1365	53.88	0.538
evm.model.scaffold_100.1222	49.61	0.276
evm.model.scaffold_100.792	54.32	0.041
evm.model.scaffold_100.1375	56.24	0.154
evm.model.scaffold_100.257	56.68	0.198
evm.model.scaffold_100.237	52.95	0.248
evm.model.scaffold_100.996	49.18	0.011
evm.model.scaffold_100.771	53.58	0.068
evm.model.scaffold_100.1230	51.63	0.156
evm.model.scaffold_100.1565	46.11	0.642
evm.model.scaffold_100.178	51.56	0.08
evm.model.scaffold_100.541	57.47	0.283
evm.model.scaffold_100.634	56.54	0.072
evm.model.scaffold_100.639	51.73	0.989
evm.model.scaffold_100.1722	52.46	0.024
evm.model.scaffold_100.607	53.88	0.571
evm.model.scaffold_100.174	49.58	0.628
evm.model.scaffold_100.1187	46.59	0.64
evm.model.scaffold_100.1555	50.5	0.08
evm.model.scaffold_100.47	44.2	0.08
evm.model.scaffold_100.395	54.93	0.069
evm.model.scaffold_100.451	56.46	0.192
evm.model.scaffold_100.386	51.73	0.088
evm.model.scaffold_100.866	51.45	0.356
evm.model.scaffold_100.1465	54.12	0.289
evm.model.scaffold_100.130	49.22	0.184
evm.model.scaffold_100.734	60.02	0.218
evm.model.scaffold_100.882	59.25	0.253
evm.model.scaffold_100.347	47.47	0.036
evm.model.scaffold_100.1197	45.94	0.261
evm.model.scaffold_100.1022	46.88	0.143
evm.model.scaffold_100.584	54.49	0.966
evm.model.scaffold_100.699	58.77	0.171
evm.model.scaffold_100.674	49.39	0.293
evm.model.scaffold_100.1271.1	53.86	0.005
evm.model.scaffold_100.684	55.15	0.19
evm.model.scaffold_100.982	54.23	0.877
evm.model.scaffold_100.749	51.84	0.677
evm.model.scaffold_100.1572	53.98	0.226
evm.model.scaffold_100.1175	61	0.521
evm.model.scaffold_100.254	52.59	0.824
evm.model.scaffold_100.1511	54.5	0.783
evm.model.scaffold_100.1008	50.49	0.881
evm.model.scaffold_100.470	52.87	0.332
evm.model.scaffold_100.366	53.7	0.103
evm.model.scaffold_100.527	52.63	0.58
evm.model.scaffold_100.1102	45.15	0.984
evm.model.scaffold_100.106	51.92	0.045
evm.model.scaffold_100.70	58.39	0.819
evm.model.scaffold_100.1677	54.38	0.603
evm.model.scaffold_100.1478	52.14	0.055
evm.model.scaffold_100.632	53.5	0.388
evm.model.scaffold_100.76	55.13	0.396
evm.model.scaffold_100.1399	50.65	0.042
evm.model.scaffold_100.1551	53.81	0.114
evm.model.scaffold_100.90	56.17	0.711
evm.model.scaffold_100.693	51.79	0.86
evm.model.scaffold_100.1841	59.98	0.355
evm.model.scaffold_100.1264	44.67	0.997
evm.model.scaffold_100.485	54.72	0.275
evm.model.scaffold_100.1442	53.92	0.031
evm.model.scaffold_100.807	52.71	0.069
evm.model.scaffold_100.912	53.92	0.039
evm.model.scaffold_100.1220	48.07	0.038
evm.model.scaffold_100.1413	60.76	0.2
evm.model.scaffold_100.358	49.23	0.01
evm.model.scaffold_100.134	52.8	0.285
evm.model.scaffold_100.1283	52.24	0.15
evm.model.scaffold_100.940	51.3	0.656
evm.model.scaffold_100.645	51.91	0.03
evm.model.scaffold_100.1469	46.63	0.109
evm.model.scaffold_426.2	53.74	0.092
evm.model.scaffold_426.4	51.36	0.708
evm.model.scaffold_439.3	49.23	0.087
evm.model.scaffold_111.238	55.93	0.272
evm.model.scaffold_111.130	37.55	0.497
evm.model.scaffold_111.437	50.27	0.09
evm.model.scaffold_111.28	54.58	0.699
evm.model.scaffold_111.424	53.05	0.029
evm.model.scaffold_111.330	53.8	0.509
evm.model.scaffold_111.360	53.14	0.394
evm.model.scaffold_111.327	46.32	0.051
evm.model.scaffold_111.329.1	50.37	0.233
evm.model.scaffold_111.183_evm.model.scaffold_111.184	53.09	0.964
evm.model.scaffold_111.101	35.93	0.685
evm.model.scaffold_111.138	48.37	0.987
evm.model.scaffold_111.118	46.75	0.099
evm.model.scaffold_111.322	52.49	0.038
evm.model.scaffold_111.282	52.34	0.28
evm.model.scaffold_111.47	52.85	0.603
evm.model.scaffold_111.176	48.73	0.026
evm.model.scaffold_111.85	49.28	0.636
evm.model.scaffold_111.216	40.11	0.581
evm.model.scaffold_111.302	59.02	0.272
evm.model.scaffold_111.96	51.61	0.043
evm.model.scaffold_111.286	53.83	0.067
evm.model.scaffold_111.189	47.84	0.081
evm.model.scaffold_111.273	53.29	0.524
evm.model.scaffold_111.292	51.73	0.127
evm.model.scaffold_111.206	47.23	0.487
evm.model.scaffold_111.343	53.54	0.462
evm.model.scaffold_111.133	47.8	0.152
evm.model.scaffold_111.217	43.73	0.816
evm.model.scaffold_111.443	41.15	0.584
evm.model.scaffold_111.58	50.92	0.153
evm.model.scaffold_111.154	47.78	0.645
evm.model.scaffold_111.166	50.06	0.062
evm.model.scaffold_111.40	52.9	0.73
evm.model.scaffold_111.350	44.89	0.341
evm.model.scaffold_111.287	49.13	0.417
evm.model.scaffold_111.407	56.39	0.019
evm.model.scaffold_111.306	45.16	0.897
evm.model.scaffold_111.359	55.77	0.039
evm.model.scaffold_111.181	51.77	0.029
evm.model.scaffold_111.213	48.49	0.504
evm.model.scaffold_111.344	50.55	0.518
evm.model.scaffold_111.220	53.06	0.541
evm.model.scaffold_111.177	49.17	0.319
evm.model.scaffold_111.338	49.24	0.159
evm.model.scaffold_111.72	47.93	0.116
evm.model.scaffold_111.295	55.83	0.103
evm.model.scaffold_111.82	50.92	0.83
evm.model.scaffold_111.99	41.02	0.149
evm.model.scaffold_111.188	40.97	0.181
evm.model.scaffold_111.438	45.42	0.111
evm.model.scaffold_111.341	49.04	0.367
evm.model.scaffold_111.255	48.79	0.006
evm.model.scaffold_111.342	41.84	0.237
evm.model.scaffold_111.426	56.15	0.078
evm.model.scaffold_111.54	50.74	0.17
evm.model.scaffold_111.27	56.5	0.17
evm.model.scaffold_111.102	47.39	0.156
evm.model.scaffold_111.369.1	51.6	0.744
evm.model.scaffold_111.307	51.49	0.19
evm.model.scaffold_111.107	46.69	0.414
evm.model.scaffold_111.435	45.91	0.572
evm.model.scaffold_111.146	54.06	0.413
evm.model.scaffold_111.411	57.52	0.505
evm.model.scaffold_111.237	53.64	0.842
evm.model.scaffold_111.125	51.42	0.332
evm.model.scaffold_111.277	48.9	0.396
evm.model.scaffold_111.83	55.28	0.022
evm.model.scaffold_111.197	47.02	0.014
evm.model.scaffold_111.153	52.83	0.362
evm.model.scaffold_111.205	49.25	0.192
evm.model.scaffold_111.124	48.04	0.064
evm.model.scaffold_111.149	47.11	0.451
evm.model.scaffold_111.357	53.21	0.43
evm.model.scaffold_111.347	48.07	0.058
evm.model.scaffold_111.87	47.74	0.159
evm.model.scaffold_111.150	43.6	0.864
evm.model.scaffold_111.192	48.48	0.468
evm.model.scaffold_111.358	49.3	0.216
evm.model.scaffold_111.370	50.35	0.299
evm.model.scaffold_111.20	55.55	0.551
evm.model.scaffold_111.210	46.16	0.687
evm.model.scaffold_111.429	53.86	0.265
evm.model.scaffold_111.187	41.79	0.455
evm.model.scaffold_111.431	50.9	0.226
evm.model.scaffold_111.305	55.72	0.964
evm.model.scaffold_111.247	52.62	0.062
evm.model.scaffold_111.179	48.8	0.656
evm.model.scaffold_111.157	49.65	0.103
evm.model.scaffold_111.423	47.92	0.113
evm.model.scaffold_111.174	45.9	0.067
evm.model.scaffold_111.367	49.55	0.277
evm.model.scaffold_23.110	61	0.077
evm.model.scaffold_23.26	58.62	0.11
evm.model.scaffold_23.35	56.23	0.793
evm.model.scaffold_23.105	49.08	0.793
evm.model.scaffold_23.99	49.67	0.076
evm.model.scaffold_23.54	54.64	0.518
evm.model.scaffold_23.109	43.68	0.036
evm.model.scaffold_23.84	46.72	0.018
evm.model.scaffold_23.30	56.02	0.017
evm.model.scaffold_23.69	48.57	0.313
evm.model.scaffold_23.40	47.63	0.167
evm.model.scaffold_335.4	61	0.837
evm.model.scaffold_335.43	54.12	0.246
evm.model.scaffold_335.18	47.01	0.261
evm.model.scaffold_335.28.1	49.92	0.238
evm.model.scaffold_335.13	48.08	0.169
evm.model.scaffold_335.16	61	0.181
evm.model.scaffold_335.46	55.37	0.716
evm.model.scaffold_335.10	46.16	0.061
evm.model.scaffold_335.20	51.29	0.805
evm.model.scaffold_335.19	46.94	0.226
evm.model.scaffold_335.17	53.25	0.513
evm.model.scaffold_335.41	50.3	0.529
evm.model.scaffold_218.4	51.22	0.091
evm.model.scaffold_181.63	50.58	0.237
evm.model.scaffold_181.12	53.01	0.604
evm.model.scaffold_181.71	51.98	0.316
evm.model.scaffold_124.2	51.51	0.674
evm.model.scaffold_124.3	52.05	0.453
evm.model.scaffold_150.5	57.55	0.642
evm.model.scaffold_31.27	59.59	0.466
evm.model.scaffold_31.29	54.07	0.373
evm.model.scaffold_31.47	52.8	0.542
evm.model.scaffold_31.71	57.54	0.276
evm.model.scaffold_31.4	52.02	0.567
evm.model.scaffold_31.59	51.22	0.071
evm.model.scaffold_31.42.1	56.72	0.633
evm.model.scaffold_31.33	45.87	0.098
evm.model.scaffold_31.84	51.4	0.769
evm.model.scaffold_31.30	56.76	0.485
evm.model.scaffold_31.34	54.05	0.313
evm.model.scaffold_31.123	49.1	0.341
evm.model.scaffold_160.2	56.04	0.084
evm.model.scaffold_421.1	52.33	0.119
evm.model.scaffold_344.4	56.02	0.439
evm.model.scaffold_344.6	55.37	0.952
evm.model.scaffold_344.5	53.76	0.055
evm.model.scaffold_344.2	50.05	0.412
evm.model.scaffold_122.2	50.48	0.021
evm.model.scaffold_122.3	50.67	0.072
evm.model.scaffold_1.44	50.68	0.53
evm.model.scaffold_1.28	52.34	0.01
evm.model.scaffold_1.21	54.61	0.919
evm.model.scaffold_1.37	48.12	0.806
evm.model.scaffold_1.41	57.21	0.229
evm.model.scaffold_3.74	41.57	0.254
evm.model.scaffold_3.13	51.26	0.576
evm.model.scaffold_3.62	50.86	0.664
evm.model.scaffold_3.22	53.11	0.535
evm.model.scaffold_3.39	57.89	0.051
evm.model.scaffold_3.23	49.37	0.149
evm.model.scaffold_3.24	51.79	0.056
evm.model.scaffold_3.75	54.9	0.071
evm.model.scaffold_189.131_evm.model.scaffold_189.132	55.73	0.074
evm.model.scaffold_189.9	53.76	0.023
evm.model.scaffold_189.37	60.59	0.028
evm.model.scaffold_189.59	54.97	0.025
evm.model.scaffold_189.67	55.23	0.512
evm.model.scaffold_189.110	50.39	0.528
evm.model.scaffold_189.77	46.89	0.384
evm.model.scaffold_189.30	51.13	0.778
evm.model.scaffold_189.54	52.13	0.079
evm.model.scaffold_189.99	55.04	0.023
evm.model.scaffold_189.83	56.95	0.694
evm.model.scaffold_189.5	46.7	0.52
evm.model.scaffold_189.113	47.76	0.36
evm.model.scaffold_394.569	53.28	0.93
evm.model.scaffold_394.122	48.31	0.536
evm.model.scaffold_394.436	51.38	0.022
evm.model.scaffold_394.480	42.65	0.636
evm.model.scaffold_394.506	56.18	0.861
evm.model.scaffold_394.481	49.07	0.924
evm.model.scaffold_394.199	52.01	0.043
evm.model.scaffold_394.72	47.79	0.512
evm.model.scaffold_394.157	52.96	0.489
evm.model.scaffold_394.88	55.91	0.096
evm.model.scaffold_394.487	58.6	0.063
evm.model.scaffold_394.404	60.23	0.88
evm.model.scaffold_394.47	51.21	0.455
evm.model.scaffold_394.193	53.58	0.082
evm.model.scaffold_394.125	52.62	0.49
evm.model.scaffold_394.437	50.85	0.21
evm.model.scaffold_394.19	49.81	0.713
evm.model.scaffold_394.301	52.62	0.299
evm.model.scaffold_394.321	46.01	0.06
evm.model.scaffold_394.281	50.05	0.619
evm.model.scaffold_394.85	53.24	0.071
evm.model.scaffold_394.343	54.01	0.82
evm.model.scaffold_394.241	60.45	0.116
evm.model.scaffold_394.525	52.79	0.934
evm.model.scaffold_394.285	56.55	0.533
evm.model.scaffold_394.493	50.21	0.488
evm.model.scaffold_394.500	54.39	0.816
evm.model.scaffold_394.565	52.66	0.079
evm.model.scaffold_394.12	55.62	0.578
evm.model.scaffold_394.216	52.39	0.114
evm.model.scaffold_394.89	51.68	0.018
evm.model.scaffold_394.55	56.99	0.731
evm.model.scaffold_394.78	48.66	0.025
evm.model.scaffold_394.302	50.63	0.295
evm.model.scaffold_394.247	54.69	0.115
evm.model.scaffold_394.102	54.09	0.438
evm.model.scaffold_394.32	61	0.933
evm.model.scaffold_394.37	53.69	0.105
evm.model.scaffold_394.489	58.81	0.312
evm.model.scaffold_394.106	51.04	0.453
evm.model.scaffold_394.230	49.76	0.511
evm.model.scaffold_394.31	53.98	0.746
evm.model.scaffold_394.418	52.74	0.556
evm.model.scaffold_394.259	54.19	0.547
evm.model.scaffold_394.453	52.96	0.602
evm.model.scaffold_394.305	55.78	0.377
evm.model.scaffold_394.367	57.1	0.877
evm.model.scaffold_394.415	55.38	0.071
evm.model.scaffold_394.534	51.23	0.45
evm.model.scaffold_394.274	57.12	0.729
evm.model.scaffold_394.371	54.01	0.717
evm.model.scaffold_394.86	40.46	0.851
evm.model.scaffold_394.566	51.39	0.428
evm.model.scaffold_394.426	52.93	0.385
evm.model.scaffold_394.143	39.68	0.536
evm.model.scaffold_394.307	47.88	0.035
evm.model.scaffold_394.117	53.24	0.134
evm.model.scaffold_394.74	55.61	0.27
evm.model.scaffold_394.561	51.38	0.249
evm.model.scaffold_394.526	51.36	0.849
evm.model.scaffold_394.438	52.07	0.052
evm.model.scaffold_394.123	48.07	0.765
evm.model.scaffold_394.196	51.35	0.568
evm.model.scaffold_394.98	53.24	0.886
evm.model.scaffold_394.423	49.4	0.641
evm.model.scaffold_394.299	53.33	0.36
evm.model.scaffold_394.435	51.47	0.626
evm.model.scaffold_394.254	55.92	0.448
evm.model.scaffold_394.298	54.33	0.062
evm.model.scaffold_394.253	52.6	0.019
evm.model.scaffold_394.142	37.16	0.817
evm.model.scaffold_394.29	57.71	0.119
evm.model.scaffold_394.79	56.22	0.038
evm.model.scaffold_394.41	57.41	0.09
evm.model.scaffold_394.392	53.8	0.379
evm.model.scaffold_394.197	51	0.192
evm.model.scaffold_394.76	54.34	0.48
evm.model.scaffold_394.201	45.66	0.857
evm.model.scaffold_394.573	54.28	0.206
evm.model.scaffold_394.550	50.44	0.621
evm.model.scaffold_394.379	51.85	0.822
evm.model.scaffold_394.246	52.74	0.779
evm.model.scaffold_394.57	53.1	0.881
evm.model.scaffold_394.455	61	0.299
evm.model.scaffold_394.492.1	51.36	0.851
evm.model.scaffold_394.187	48.31	0.04
evm.model.scaffold_394.30	45.2	0.515
evm.model.scaffold_394.338	53.74	0.439
evm.model.scaffold_394.252	49.79	0.146
evm.model.scaffold_394.543	53.67	0.95
evm.model.scaffold_394.282	48.54	0.152
evm.model.scaffold_394.179	56.79	0.951
evm.model.scaffold_394.27	58.77	0.055
evm.model.scaffold_394.422	50.2	0.192
evm.model.scaffold_394.336	52.46	0.506
evm.model.scaffold_394.2	51.38	0.268
evm.model.scaffold_394.477	58.55	0.04
evm.model.scaffold_394.434	53.76	0.219
evm.model.scaffold_394.234	49.96	0.438
evm.model.scaffold_394.194	50.45	0.091
evm.model.scaffold_394.460	57.24	0.369
evm.model.scaffold_394.322	54.69	0.323
evm.model.scaffold_394.213	53.56	0.315
evm.model.scaffold_394.262	49.07	0.861
evm.model.scaffold_394.15	54.49	0.101
evm.model.scaffold_394.175	51.67	0.467
evm.model.scaffold_394.73	49.21	0.326
evm.model.scaffold_394.524	61	0.051
evm.model.scaffold_394.420	56.98	0.854
evm.model.scaffold_44.389	48.82	0.061
evm.model.scaffold_44.164	54.19	0.029
evm.model.scaffold_44.32	56.31	0.646
evm.model.scaffold_44.205	47.13	0.955
evm.model.scaffold_44.201	48.4	0.058
evm.model.scaffold_44.240	53.07	0.665
evm.model.scaffold_44.70	48.01	0.12
evm.model.scaffold_44.214	48.09	0.219
evm.model.scaffold_44.37	52.5	0.868
evm.model.scaffold_44.181	49.37	0.064
evm.model.scaffold_44.103	53.08	0.539
evm.model.scaffold_44.359	47.64	0.268
evm.model.scaffold_44.274	52.37	0.762
evm.model.scaffold_44.261	50.39	0.685
evm.model.scaffold_44.456	51.42	0.465
evm.model.scaffold_44.514	47.35	0.307
evm.model.scaffold_44.84	43.29	0.21
evm.model.scaffold_44.76	48.49	0.234
evm.model.scaffold_44.320	44.17	0.942
evm.model.scaffold_44.89	44.6	0.09
evm.model.scaffold_44.337	50.46	0.085
evm.model.scaffold_44.25	47.28	0.351
evm.model.scaffold_44.271	54.85	0.398
evm.model.scaffold_44.318	48.35	0.635
evm.model.scaffold_44.502	48.2	0.215
evm.model.scaffold_44.450	47.05	0.924
evm.model.scaffold_44.370	48.65	0.073
evm.model.scaffold_44.30	61	0.546
evm.model.scaffold_44.410	54.73	0.066
evm.model.scaffold_44.114	51.07	0.662
evm.model.scaffold_44.96	50.59	0.117
evm.model.scaffold_44.528	49.17	0.4
evm.model.scaffold_44.74	55.29	0.219
evm.model.scaffold_44.200	48.06	0.025
evm.model.scaffold_44.292	57.11	0.918
evm.model.scaffold_44.422	54.41	0.149
evm.model.scaffold_44.262	48.34	0.339
evm.model.scaffold_44.481	53.75	0.289
evm.model.scaffold_44.455	51.25	0.307
evm.model.scaffold_44.83	47.48	0.084
evm.model.scaffold_44.51	56.88	0.182
evm.model.scaffold_44.487	54.56	0.304
evm.model.scaffold_44.230	54.51	0.217
evm.model.scaffold_44.113	49.87	0.429
evm.model.scaffold_44.228	53.5	0.056
evm.model.scaffold_44.445	50.25	0.594
evm.model.scaffold_44.516	52	0.161
evm.model.scaffold_44.478	52.56	0.126
evm.model.scaffold_44.16	51	0.284
evm.model.scaffold_44.78	51.18	0.085
evm.model.scaffold_44.171	49.82	0.492
evm.model.scaffold_44.11	44.92	0.81
evm.model.scaffold_44.345	50.53	0.034
evm.model.scaffold_44.177	50.61	0.432
evm.model.scaffold_44.276	47.76	0.314
evm.model.scaffold_44.395	55.91	0.15
evm.model.scaffold_44.351	61	0.646
evm.model.scaffold_44.518	46.16	0.142
evm.model.scaffold_44.298	41.22	0.215
evm.model.scaffold_44.531	54.05	0.023
evm.model.scaffold_44.225	43.79	0.412
evm.model.scaffold_44.98	49.48	0.042
evm.model.scaffold_44.31	49.6	0.301
evm.model.scaffold_44.121	55.6	0.528
evm.model.scaffold_44.143	51.36	0.088
evm.model.scaffold_44.210	47.49	0.637
evm.model.scaffold_44.188	58.13	0.762
evm.model.scaffold_44.110	43.19	0.646
evm.model.scaffold_44.159	41.84	0.237
evm.model.scaffold_44.44	49.04	0.345
evm.model.scaffold_44.158	57.97	0.394
evm.model.scaffold_44.434	61	0.11
evm.model.scaffold_44.235	53.16	0.203
evm.model.scaffold_44.340	49.33	0.341
evm.model.scaffold_44.385	44.91	0.058
evm.model.scaffold_44.22	51.5	0.113
evm.model.scaffold_44.62	58.18	0.184
evm.model.scaffold_44.500	46.58	0.277
evm.model.scaffold_44.343	52.03	0.114
evm.model.scaffold_16.1	55.94	0.017
evm.model.scaffold_16.6	51.05	0.099
evm.model.scaffold_16.7	52.46	0.689
evm.model.scaffold_16.5	58.58	0.031
evm.model.scaffold_64.7	53.18	0.035
evm.model.scaffold_64.16	45.63	0.186
evm.model.scaffold_64.48	50.46	0.064
evm.model.scaffold_64.19	50.31	0.054
evm.model.scaffold_64.5	61	0.381
evm.model.scaffold_64.4	48.12	0.816
evm.model.scaffold_64.34	50.8	0.236
evm.model.scaffold_64.61	54.03	0.196
evm.model.scaffold_64.32	51.12	0.125
evm.model.scaffold_64.59	51.31	0.075
evm.model.scaffold_64.26	46.47	0.878
evm.model.scaffold_64.41	60.4	0.176
evm.model.scaffold_64.35	48.19	0.22
evm.model.scaffold_64.8	54.36	0.107
evm.model.scaffold_64.40	49.07	0.124
evm.model.scaffold_64.9	53.57	0.669
evm.model.scaffold_64.11	53.45	0.456
evm.model.scaffold_64.27	50.91	0.481
evm.model.scaffold_64.71	51.32	0.602
evm.model.scaffold_64.46	48.52	0.291
evm.model.scaffold_64.76_evm.model.scaffold_64.77	51.92	0.269
evm.model.scaffold_64.29	54.58	0.064
evm.model.scaffold_385.5	54.53	0.072
evm.model.scaffold_385.3	50.25	0.615
evm.model.scaffold_385.6	55.38	0.073
evm.model.scaffold_385.2	55.58	0.198
evm.model.scaffold_0.65	59.38	0.708
evm.model.scaffold_0.13	48.12	0.967
evm.model.scaffold_0.7	60.88	0.124
evm.model.scaffold_0.2	55.05	0.015
evm.model.scaffold_0.62	54.69	0.354
evm.model.scaffold_0.30	53.63	0.242
evm.model.scaffold_0.44	39.47	0.575
evm.model.scaffold_0.71	53.29	0.133
evm.model.scaffold_290.140	57.4	0.594
evm.model.scaffold_290.6	49.26	0.092
evm.model.scaffold_290.43	53.21	0.122
evm.model.scaffold_290.234	51.65	0.915
evm.model.scaffold_290.78	42.17	0.262
evm.model.scaffold_290.308	49.15	0.097
evm.model.scaffold_290.94	61	0.559
evm.model.scaffold_290.497	48.84	0.257
evm.model.scaffold_290.300	49.32	0.48
evm.model.scaffold_290.477	51.89	0.46
evm.model.scaffold_290.315	50.92	0.621
evm.model.scaffold_290.354	56.42	0.366
evm.model.scaffold_290.26	53.74	0.595
evm.model.scaffold_290.415	46.78	0.391
evm.model.scaffold_290.27	39.32	0.197
evm.model.scaffold_290.126	57.13	0.04
evm.model.scaffold_290.416	46.36	0.739
evm.model.scaffold_290.206	52.47	0.347
evm.model.scaffold_290.400	53.4	0.738
evm.model.scaffold_290.107	60.84	0.904
evm.model.scaffold_290.245	47.98	0.774
evm.model.scaffold_290.207	51.72	0.881
evm.model.scaffold_290.202	56.98	0.797
evm.model.scaffold_290.572	47.93	0.073
evm.model.scaffold_290.147	54.38	0.646
evm.model.scaffold_290.322	52.94	0.46
evm.model.scaffold_290.661	52.76	0.082
evm.model.scaffold_290.67	55.12	0.178
evm.model.scaffold_290.70	51.48	0.127
evm.model.scaffold_290.523	48.09	0.26
evm.model.scaffold_290.69	46.44	0.57
evm.model.scaffold_290.569	44.79	0.163
evm.model.scaffold_290.317	48.2	0.422
evm.model.scaffold_290.696	50.74	0.27
evm.model.scaffold_290.501	61	0.364
evm.model.scaffold_290.676_evm.model.scaffold_290.678	57.5	0.893
evm.model.scaffold_290.687	54.97	0.732
evm.model.scaffold_290.502	49.77	0.175
evm.model.scaffold_290.534	49.77	0.068
evm.model.scaffold_290.218	55.95	0.043
evm.model.scaffold_290.277	60.89	0.459
evm.model.scaffold_290.358	52.23	0.103
evm.model.scaffold_290.683	54.1	0.608
evm.model.scaffold_290.136	53.82	0.078
evm.model.scaffold_290.555	38.26	0.437
evm.model.scaffold_290.280	53.09	0.24
evm.model.scaffold_290.530	44.69	0.042
evm.model.scaffold_290.260	50.75	0.274
evm.model.scaffold_290.411	58.17	0.023
evm.model.scaffold_290.593	44.37	0.016
evm.model.scaffold_290.55	48.2	0.727
evm.model.scaffold_290.521	49.71	0.106
evm.model.scaffold_290.392	37.39	0.074
evm.model.scaffold_290.92	53.02	0.107
evm.model.scaffold_290.504	50.51	0.758
evm.model.scaffold_290.186.1	50.52	0.012
evm.model.scaffold_290.295	46.92	0.176
evm.model.scaffold_290.211	53.16	0.357
evm.model.scaffold_290.513	52.81	0.165
evm.model.scaffold_290.306	50.49	0.026
evm.model.scaffold_290.624	55.25	0.182
evm.model.scaffold_290.328	40.54	0.554
evm.model.scaffold_290.636	50.61	0.404
evm.model.scaffold_290.42	43.63	0.235
evm.model.scaffold_290.639	53.68	0.043
evm.model.scaffold_290.85	61	0.361
evm.model.scaffold_290.232	54.91	0.388
evm.model.scaffold_290.506	49.62	0.263
evm.model.scaffold_290.391	54.03	0.563
evm.model.scaffold_290.197	52.23	0.385
evm.model.scaffold_290.664	45.83	0.907
evm.model.scaffold_290.57	54.86	0.058
evm.model.scaffold_290.21	50.23	0.534
evm.model.scaffold_290.174	51.21	0.41
evm.model.scaffold_290.706	45.7	0.142
evm.model.scaffold_290.113	51.9	0.555
evm.model.scaffold_290.617	47.75	0.016
evm.model.scaffold_290.334	49.07	0.235
evm.model.scaffold_290.633	51.31	0.395
evm.model.scaffold_290.360	49.22	0.912
evm.model.scaffold_9.5	51.68	0.807
evm.model.scaffold_9.76	57.59	0.229
evm.model.scaffold_9.79	37.07	0.562
evm.model.scaffold_9.199	61	0.071
evm.model.scaffold_9.164	54.97	0.702
evm.model.scaffold_9.239	49.46	0.018
evm.model.scaffold_9.118	52.56	0.533
evm.model.scaffold_9.65	38.75	0.809
evm.model.scaffold_9.142	45.32	0.059
evm.model.scaffold_9.83	49.2	0.746
evm.model.scaffold_9.107	54.01	0.42
evm.model.scaffold_9.218	50.93	0.163
evm.model.scaffold_9.132	56.85	0.017
evm.model.scaffold_9.74	44.03	0.924
evm.model.scaffold_9.80	53.34	0.482
evm.model.scaffold_9.134	55.31	0.208
evm.model.scaffold_9.106	57.93	0.146
evm.model.scaffold_9.186	54.93	0.197
evm.model.scaffold_9.217.1	52.01	0.796
evm.model.scaffold_9.73	46.02	0.631
evm.model.scaffold_9.75	53.88	0.041
evm.model.scaffold_9.166	54.18	0.091
evm.model.scaffold_9.200	49.36	0.868
evm.model.scaffold_9.193	61	0.417
evm.model.scaffold_378.138	48.6	0.296
evm.model.scaffold_378.124	55.72	0.648
evm.model.scaffold_378.244	57.14	0.028
evm.model.scaffold_378.260	49.86	0.466
evm.model.scaffold_378.183	48.5	0.213
evm.model.scaffold_378.101	56.74	0.634
evm.model.scaffold_378.141	47.56	0.521
evm.model.scaffold_378.150	51.47	0.149
evm.model.scaffold_378.29	50.96	0.958
evm.model.scaffold_378.241	61	0.256
evm.model.scaffold_378.397	58.03	0.167
evm.model.scaffold_378.136	47.43	0.345
evm.model.scaffold_378.214	44.76	0.178
evm.model.scaffold_378.234	45.63	0.685
evm.model.scaffold_378.351.1	50.7	0.164
evm.model.scaffold_378.144	59.13	0.222
evm.model.scaffold_378.210	50.71	0.016
evm.model.scaffold_378.103	45.62	0.078
evm.model.scaffold_378.13	51.34	0.242
evm.model.scaffold_378.367	45.78	0.025
evm.model.scaffold_378.388	52.63	0.093
evm.model.scaffold_378.159	55.12	0.187
evm.model.scaffold_378.258	52.96	0.164
evm.model.scaffold_378.94	58.54	0.367
evm.model.scaffold_378.93	56.14	0.845
evm.model.scaffold_378.179	48.26	0.084
evm.model.scaffold_378.63	51.79	0.332
evm.model.scaffold_378.330	58.01	0.136
evm.model.scaffold_378.387	57.25	0.727
evm.model.scaffold_378.332	55.92	0.259
evm.model.scaffold_378.377	52.51	0.023
evm.model.scaffold_378.182	52.27	0.209
evm.model.scaffold_378.354	45.41	0.919
evm.model.scaffold_378.140	45.4	0.223
evm.model.scaffold_378.38	49.66	0.127
evm.model.scaffold_378.175	45.61	0.059
evm.model.scaffold_378.162	55.45	0.772
evm.model.scaffold_378.35	51.83	0.094
evm.model.scaffold_378.174	58.14	0.028
evm.model.scaffold_378.147	50.98	0.717
evm.model.scaffold_378.243	57.23	0.021
evm.model.scaffold_378.74	59.25	0.322
evm.model.scaffold_378.209	51.86	0.215
evm.model.scaffold_378.96	60.66	0.457
evm.model.scaffold_378.369	52.07	0.746
evm.model.scaffold_378.347	44.23	0.086
evm.model.scaffold_378.37	35.36	0.285
evm.model.scaffold_378.7	49.76	0.349
evm.model.scaffold_34.32	48.64	0.376
evm.model.scaffold_34.130	56.98	0.369
evm.model.scaffold_34.113	52.07	0.873
evm.model.scaffold_34.5	51.18	0.666
evm.model.scaffold_34.39	53.12	0.705
evm.model.scaffold_34.17	43.83	0.109
evm.model.scaffold_34.96	54.28	0.698
evm.model.scaffold_34.10	51.02	0.094
evm.model.scaffold_34.64	51.77	0.398
evm.model.scaffold_34.112	52.88	0.044
evm.model.scaffold_62.106	55	0.52
evm.model.scaffold_62.171	57.93	0.585
evm.model.scaffold_62.29	54.63	0.903
evm.model.scaffold_62.123	51.67	0.125
evm.model.scaffold_62.37	61	0.255
evm.model.scaffold_62.121	50.99	0.606
evm.model.scaffold_62.99	56.76	0.315
evm.model.scaffold_62.120	49.54	0.623
evm.model.scaffold_62.22	55.2	0.022
evm.model.scaffold_62.1	47.51	0.166
evm.model.scaffold_62.55	45.47	0.055
evm.model.scaffold_62.23	52.36	0.869
evm.model.scaffold_62.157	48.64	0.923
evm.model.scaffold_62.118	59.81	0.614
evm.model.scaffold_62.103	52.51	0.042
evm.model.scaffold_62.130	55.79	0.043
evm.model.scaffold_62.24	56.53	0.555
evm.model.scaffold_62.140	52.09	0.081
evm.model.scaffold_62.11	51	0.749
evm.model.scaffold_62.161	49.15	0.319
evm.model.scaffold_62.38.1	55.29	0.81
evm.model.scaffold_461.245	50.32	0.461
evm.model.scaffold_461.277	46.19	0.472
evm.model.scaffold_461.1053	32.48	0.075
evm.model.scaffold_461.877	47.5	0.029
evm.model.scaffold_461.521	48.05	0.447
evm.model.scaffold_461.1040	61	0.126
evm.model.scaffold_461.91	48.32	0.388
evm.model.scaffold_461.1109	58.11	0.048
evm.model.scaffold_461.989	49.37	0.739
evm.model.scaffold_461.674	52.31	0.515
evm.model.scaffold_461.216	56.27	0.168
evm.model.scaffold_461.971	54.63	0.101
evm.model.scaffold_461.80	53.37	0.886
evm.model.scaffold_461.869	42.88	0.028
evm.model.scaffold_461.643	50.67	0.272
evm.model.scaffold_461.588	47.18	0.769
evm.model.scaffold_461.526	56.01	0.207
evm.model.scaffold_461.1099	52.09	0.295
evm.model.scaffold_461.1159	56.55	0.94
evm.model.scaffold_461.990	50.55	0.197
evm.model.scaffold_461.827	59.58	0.314
evm.model.scaffold_461.561	56.56	0.113
evm.model.scaffold_461.404	55.38	0.196
evm.model.scaffold_461.1111	58.63	0.425
evm.model.scaffold_461.311	49.72	0.41
evm.model.scaffold_461.421	47.88	0.674
evm.model.scaffold_461.1031	53.83	0.059
evm.model.scaffold_461.1078	52.69	0.029
evm.model.scaffold_461.810	54.16	0.546
evm.model.scaffold_461.713	37.87	0.224
evm.model.scaffold_461.138	50.6	0.208
evm.model.scaffold_461.669	49.44	0.354
evm.model.scaffold_461.177	47.46	0.405
evm.model.scaffold_461.424	52.37	0.835
evm.model.scaffold_461.731	52.41	0.153
evm.model.scaffold_461.77	61	0.913
evm.model.scaffold_461.644	47.14	0.301
evm.model.scaffold_461.309	54.54	0.349
evm.model.scaffold_461.761	54.21	0.198
evm.model.scaffold_461.994	61	0.183
evm.model.scaffold_461.408	54.33	0.64
evm.model.scaffold_461.717	46.26	0.746
evm.model.scaffold_461.26	51.61	0.897
evm.model.scaffold_461.790	53.87	0.671
evm.model.scaffold_461.448	51.61	0.917
evm.model.scaffold_461.655	50.41	0.159
evm.model.scaffold_461.922	52.46	0.573
evm.model.scaffold_461.455	47.54	0.648
evm.model.scaffold_461.357	51.64	0.459
evm.model.scaffold_461.93	55.14	0.612
evm.model.scaffold_461.913	53.96	0.027
evm.model.scaffold_461.329	53.44	0.516
evm.model.scaffold_461.605	52.95	0.695
evm.model.scaffold_461.1083	50.46	0.449
evm.model.scaffold_461.734	54.56	0.181
evm.model.scaffold_461.554	54.13	0.4
evm.model.scaffold_461.339	40.91	0.091
evm.model.scaffold_461.476	51.47	0.045
evm.model.scaffold_461.199	54.53	0.029
evm.model.scaffold_461.286	56.68	0.029
evm.model.scaffold_461.1077	54.35	0.39
evm.model.scaffold_461.762	53.16	0.257
evm.model.scaffold_461.857	52.98	0.018
evm.model.scaffold_461.730	52.56	0.799
evm.model.scaffold_461.324	49.96	0.726
evm.model.scaffold_461.115	49.25	0.363
evm.model.scaffold_461.962	41.61	0.301
evm.model.scaffold_461.662	58.72	0.222
evm.model.scaffold_461.126	47.97	0.504
evm.model.scaffold_461.530	40.09	0.201
evm.model.scaffold_461.72	50.29	0.683
evm.model.scaffold_461.714	46.39	0.088
evm.model.scaffold_461.654	48.1	0.777
evm.model.scaffold_461.108	47.02	0.527
evm.model.scaffold_461.306	52.49	0.025
evm.model.scaffold_461.458	49.33	0.336
evm.model.scaffold_461.970	50.27	0.571
evm.model.scaffold_461.1211	51.81	0.744
evm.model.scaffold_461.860	53.2	0.065
evm.model.scaffold_461.95	54.28	0.02
evm.model.scaffold_461.1141	60.22	0.14
evm.model.scaffold_461.575	54.07	0.041
evm.model.scaffold_461.469	52.74	0.156
evm.model.scaffold_461.294	45.17	0.015
evm.model.scaffold_461.146	58.43	0.106
evm.model.scaffold_461.53	50.83	0.81
evm.model.scaffold_461.647	55.83	0.014
evm.model.scaffold_461.1202	55.04	0.031
evm.model.scaffold_461.148	47.95	0.819
evm.model.scaffold_461.194	49.34	0.749
evm.model.scaffold_461.119	42.87	0.263
evm.model.scaffold_461.596	54.51	0.345
evm.model.scaffold_461.1145	46.03	0.114
evm.model.scaffold_461.390	61	0.31
evm.model.scaffold_461.586	36.39	0.029
evm.model.scaffold_461.348	50.13	0.965
evm.model.scaffold_461.193	58.88	0.519
evm.model.scaffold_461.524	56.37	0.271
evm.model.scaffold_461.1046	58.33	0.036
evm.model.scaffold_461.742	57.98	0.373
evm.model.scaffold_461.1116	55.65	0.213
evm.model.scaffold_461.533	46.38	0.408
evm.model.scaffold_461.1214	54.29	0.358
evm.model.scaffold_461.847	47.9	0.077
evm.model.scaffold_461.36	51.59	0.241
evm.model.scaffold_461.858	53.46	0.439
evm.model.scaffold_461.203	54.79	0.287
evm.model.scaffold_461.200	47.08	0.44
evm.model.scaffold_461.1054	45.77	0.952
evm.model.scaffold_461.370	57.06	0.284
evm.model.scaffold_461.660	46.56	0.8
evm.model.scaffold_461.855	52.28	0.513
evm.model.scaffold_461.3	47.33	0.589
evm.model.scaffold_461.154	53.18	0.65
evm.model.scaffold_461.969	55.48	0.104
evm.model.scaffold_461.63.1	51.84	0.735
evm.model.scaffold_461.377	50.68	0.165
evm.model.scaffold_461.484	46.39	0.971
evm.model.scaffold_461.1108	51.86	0.843
evm.model.scaffold_461.94	56.37	0.036
evm.model.scaffold_461.753	51.79	0.202
evm.model.scaffold_461.129	55.46	0.567
evm.model.scaffold_461.100	39.28	0.241
evm.model.scaffold_461.675	56.4	0.068
evm.model.scaffold_461.683	50.34	0.215
evm.model.scaffold_461.770	49.13	0.078
evm.model.scaffold_461.963	47.29	0.289
evm.model.scaffold_461.549	51.36	0.916
evm.model.scaffold_461.300	48.97	0.648
evm.model.scaffold_461.531	54.71	0.729
evm.model.scaffold_461.581	58.42	0.644
evm.model.scaffold_461.354	54.13	0.27
evm.model.scaffold_461.875	52.65	0.516
evm.model.scaffold_461.265	50.02	0.26
evm.model.scaffold_461.538	47.8	0.073
evm.model.scaffold_461.102	51.5	0.197
evm.model.scaffold_461.319	53.84	0.89
evm.model.scaffold_461.884	52.85	0.273
evm.model.scaffold_461.460	57.59	0.268
evm.model.scaffold_461.364	50.06	0.195
evm.model.scaffold_461.928	56.34	0.073
evm.model.scaffold_461.991	50.98	0.613
evm.model.scaffold_461.190	51.43	0.145
evm.model.scaffold_461.60	52.76	0.487
evm.model.scaffold_461.28	54.55	0.44
evm.model.scaffold_461.345	52.79	0.661
evm.model.scaffold_461.540	51.53	0.009
evm.model.scaffold_461.502	57.35	0.346
evm.model.scaffold_461.320	41.27	0.937
evm.model.scaffold_461.278	54.12	0.604
evm.model.scaffold_461.271	55.22	0.879
evm.model.scaffold_461.32	56.74	0.781
evm.model.scaffold_461.326.1	56.96	0.372
evm.model.scaffold_461.787	55.94	0.225
evm.model.scaffold_461.517	50.65	0.525
evm.model.scaffold_461.75	52.58	0.633
evm.model.scaffold_461.402	50.11	0.249
evm.model.scaffold_461.316	50.08	0.212
evm.model.scaffold_461.597	50.65	0.056
evm.model.scaffold_461.640	61	0.463
evm.model.scaffold_461.220	53.07	0.198
evm.model.scaffold_461.695	52.61	0.365
evm.model.scaffold_461.537	37.76	0.298
evm.model.scaffold_461.568	52.86	0.415
evm.model.scaffold_461.573	46.94	0.291
evm.model.scaffold_54.183	49.41	0.99
evm.model.scaffold_54.227	53.55	0.013
evm.model.scaffold_54.287	52	0.514
evm.model.scaffold_54.155	57.28	0.024
evm.model.scaffold_54.115	49.96	0.203
evm.model.scaffold_54.264	47.69	0.202
evm.model.scaffold_54.259	44.8	0.22
evm.model.scaffold_54.117	61	0.588
evm.model.scaffold_54.149	52.96	0.274
evm.model.scaffold_54.273	56.64	0.72
evm.model.scaffold_54.290	51	0.029
evm.model.scaffold_54.53	57.55	0.882
evm.model.scaffold_54.178	50.93	0.179
evm.model.scaffold_54.316	53.03	0.129
evm.model.scaffold_54.136	54.39	0.585
evm.model.scaffold_54.113	55	0.704
evm.model.scaffold_54.260	42.88	0.527
evm.model.scaffold_54.277	52.06	0.796
evm.model.scaffold_54.330	50.66	0.193
evm.model.scaffold_54.262	46.12	0.031
evm.model.scaffold_54.163	52.86	0.866
evm.model.scaffold_54.321	50.98	0.036
evm.model.scaffold_54.104	43.62	0.292
evm.model.scaffold_54.210	50.19	0.542
evm.model.scaffold_54.233	52.79	0.256
evm.model.scaffold_54.206	50.71	0.326
evm.model.scaffold_54.296	52.72	0.631
evm.model.scaffold_54.152	56.82	0.106
evm.model.scaffold_54.63	55.2	0.268
evm.model.scaffold_54.76	53.7	0.14
evm.model.scaffold_54.184	51.98	0.323
evm.model.scaffold_54.348	51.43	0.286
evm.model.scaffold_54.94	51.66	0.079
evm.model.scaffold_54.110	39.33	0.993
evm.model.scaffold_54.229	61	0.692
evm.model.scaffold_54.173	53.37	0.026
evm.model.scaffold_54.195	51.47	0.563
evm.model.scaffold_54.142	50.61	0.015
evm.model.scaffold_54.280	57.74	0.115
evm.model.scaffold_54.292	50.01	0.982
evm.model.scaffold_54.192	50.51	0.976
evm.model.scaffold_54.211	49.84	0.69
evm.model.scaffold_54.41	59.3	0.248
evm.model.scaffold_54.331	57.46	0.284
evm.model.scaffold_54.250	48.84	0.08
evm.model.scaffold_54.203_evm.model.scaffold_54.204	52.86	0.053
evm.model.scaffold_54.166	44.42	0.051
evm.model.scaffold_54.252	59.35	0.439
evm.model.scaffold_54.349	52.36	0.031
evm.model.scaffold_230.3	53.24	0.033
evm.model.scaffold_230.5	55.89	0.271
evm.model.scaffold_230.6	48.62	0.035
evm.model.scaffold_230.2	50.59	0.338
evm.model.scaffold_247.28	50.59	0.476
evm.model.scaffold_247.37	47.01	0.031
evm.model.scaffold_247.20	48.04	0.079
evm.model.scaffold_247.44	38.72	0.744
evm.model.scaffold_247.3	56.27	0.265
evm.model.scaffold_357.3	56.05	0.247
evm.model.scaffold_130.4	55.84	0.038
evm.model.scaffold_130.2	48.95	0.142
evm.model.scaffold_130.6	53.7	0.338
evm.model.scaffold_130.12	48.31	0.159
evm.model.scaffold_130.14	61	0.181
evm.model.scaffold_130.15	52.37	0.011
evm.model.scaffold_130.5	54.01	0.034
evm.model.scaffold_61.4	55.54	0.582
evm.model.scaffold_61.49	61	0.99
evm.model.scaffold_61.23	56.18	0.261
evm.model.scaffold_61.12	53.58	0.565
evm.model.scaffold_427.92	48.8	0.149
evm.model.scaffold_427.34	51.49	0.034
evm.model.scaffold_427.56	52	0.097
evm.model.scaffold_427.93	46.11	0.081
evm.model.scaffold_427.68	50.2	0.473
evm.model.scaffold_427.97	55.15	0.309
evm.model.scaffold_427.209	50.38	0.144
evm.model.scaffold_427.227	51.72	0.369
evm.model.scaffold_427.195	53.29	0.753
evm.model.scaffold_427.1	51.72	0.039
evm.model.scaffold_427.44.1	49.79	0.101
evm.model.scaffold_427.208	60.89	0.109
evm.model.scaffold_427.138	55.2	0.794
evm.model.scaffold_427.191	55.48	0.022
evm.model.scaffold_427.33	49.15	0.056
evm.model.scaffold_427.115	55.12	0.545
evm.model.scaffold_427.234	59.52	0.463
evm.model.scaffold_427.14	52.82	0.443
evm.model.scaffold_427.107	50.71	0.013
evm.model.scaffold_427.58	47.81	0.13
evm.model.scaffold_427.190	54.04	0.027
evm.model.scaffold_427.47	51.6	0.892
evm.model.scaffold_427.215	48.56	0.063
evm.model.scaffold_427.51.1	40.53	0.395
evm.model.scaffold_427.143	51.17	0.445
evm.model.scaffold_427.154	54.53	0.351
evm.model.scaffold_427.134	50.34	0.204
evm.model.scaffold_427.13	50.36	0.904
evm.model.scaffold_427.91	61	0.824
evm.model.scaffold_427.2	52.96	0.091
evm.model.scaffold_427.140	57.8	0.738
evm.model.scaffold_427.23	54.59	0.339
evm.model.scaffold_427.181	54.22	0.556
evm.model.scaffold_427.31	58.3	0.301
evm.model.scaffold_427.117	56.44	0.168
evm.model.scaffold_427.36	59.08	0.11
evm.model.scaffold_427.75	46.43	0.12
evm.model.scaffold_427.157	51.83	0.08
evm.model.scaffold_427.171	52.2	0.417
evm.model.scaffold_2.1	58.25	0.085
evm.model.scaffold_2.8	47.17	0.035
evm.model.scaffold_134.9	48.54	0.156
evm.model.scaffold_134.10	45.79	0.214
evm.model.scaffold_29.425	44.42	0.367
evm.model.scaffold_29.628	52.93	0.091
evm.model.scaffold_29.257	50.56	0.16
evm.model.scaffold_29.725	50.88	0.717
evm.model.scaffold_29.679	49.23	0.028
evm.model.scaffold_29.414	49.75	0.015
evm.model.scaffold_29.648	52.29	0.999
evm.model.scaffold_29.304	46.35	0.546
evm.model.scaffold_29.703	48.94	0.372
evm.model.scaffold_29.364	53.06	0.108
evm.model.scaffold_29.619	49.33	0.361
evm.model.scaffold_29.326	48.23	0.236
evm.model.scaffold_29.571.1	40.07	0.137
evm.model.scaffold_29.488	52.51	0.935
evm.model.scaffold_29.258	53.42	0.525
evm.model.scaffold_29.493	50.77	0.012
evm.model.scaffold_29.780	51.3	0.822
evm.model.scaffold_29.7	45.57	0.641
evm.model.scaffold_29.787	44.21	0.161
evm.model.scaffold_29.469	52.33	0.01
evm.model.scaffold_29.351	48.03	0.698
evm.model.scaffold_29.134	49.28	0.067
evm.model.scaffold_29.202	45.05	0.377
evm.model.scaffold_29.32	33.95	0.793
evm.model.scaffold_29.176	44.56	0.11
evm.model.scaffold_29.298	56.41	0.78
evm.model.scaffold_29.180	48.42	0.215
evm.model.scaffold_29.291	48.97	0.652
evm.model.scaffold_29.342	58.31	0.072
evm.model.scaffold_29.375	52.51	0.421
evm.model.scaffold_29.657	44.9	0.295
evm.model.scaffold_29.213	51.24	0.023
evm.model.scaffold_29.293	49.92	0.376
evm.model.scaffold_29.781	50.29	0.706
evm.model.scaffold_29.122	59.27	0.735
evm.model.scaffold_29.691	50.24	0.689
evm.model.scaffold_29.577	53.78	0.035
evm.model.scaffold_29.782	58.67	0.19
evm.model.scaffold_29.660	53.21	0.88
evm.model.scaffold_29.289	55.6	0.291
evm.model.scaffold_29.386	61	0.408
evm.model.scaffold_29.483	46.36	0.054
evm.model.scaffold_29.428	51.31	0.818
evm.model.scaffold_29.419	51.05	0.373
evm.model.scaffold_29.143	48.38	0.018
evm.model.scaffold_29.150	55.61	0.644
evm.model.scaffold_29.415	43.75	0.293
evm.model.scaffold_29.778	53.43	0.703
evm.model.scaffold_29.416	53.5	0.599
evm.model.scaffold_29.470	55.33	0.807
evm.model.scaffold_29.697	60.29	0.103
evm.model.scaffold_29.412	55.59	0.577
evm.model.scaffold_29.655	51.69	0.61
evm.model.scaffold_29.266	51.9	0.03
evm.model.scaffold_29.389	48.99	0.157
evm.model.scaffold_29.574	54.1	0.496
evm.model.scaffold_29.118	48.74	0.716
evm.model.scaffold_29.473	51.79	0.234
evm.model.scaffold_29.785	56.32	0.159
evm.model.scaffold_29.295	48.22	0.899
evm.model.scaffold_29.753	48.26	0.036
evm.model.scaffold_29.91	59.16	0.087
evm.model.scaffold_29.435	45.56	0.055
evm.model.scaffold_29.393	44.72	0.334
evm.model.scaffold_29.442	46.86	0.952
evm.model.scaffold_29.232	49.93	0.368
evm.model.scaffold_29.587	45.8	0.162
evm.model.scaffold_29.481	54.63	0.713
evm.model.scaffold_29.336	56.21	0.667
evm.model.scaffold_29.256	49.31	0.098
evm.model.scaffold_29.275	51.38	0.822
evm.model.scaffold_29.449	41.19	0.361
evm.model.scaffold_29.231	58.24	0.073
evm.model.scaffold_29.754	53	0.172
evm.model.scaffold_29.366	53.89	0.165
evm.model.scaffold_29.685	47.38	0.02
evm.model.scaffold_29.706	51.62	0.034
evm.model.scaffold_29.418	51.6	0.712
evm.model.scaffold_29.445	52.7	0.077
evm.model.scaffold_29.108	42.51	0.131
evm.model.scaffold_29.259	57.18	0.228
evm.model.scaffold_29.371	50.85	0.144
evm.model.scaffold_29.250	47.59	0.318
evm.model.scaffold_29.453	51.58	0.27
evm.model.scaffold_29.348	52.49	0.638
evm.model.scaffold_29.267	51.9	0.393
evm.model.scaffold_29.742	41.87	0.411
evm.model.scaffold_29.129	50.4	0.191
evm.model.scaffold_29.377	47.86	0.181
evm.model.scaffold_29.254	51.94	0.008
evm.model.scaffold_29.779	50.7	0.64
evm.model.scaffold_29.567	54.06	0.234
evm.model.scaffold_29.740	59.27	0.065
evm.model.scaffold_29.394	48.74	0.345
evm.model.scaffold_29.77	53.01	0.65
evm.model.scaffold_29.319	55.59	0.183
evm.model.scaffold_29.41	46.23	0.017
evm.model.scaffold_29.307	48.51	0.551
evm.model.scaffold_29.398	50.48	0.392
evm.model.scaffold_29.711	50.86	0.596
evm.model.scaffold_29.84	54.61	0.076
evm.model.scaffold_29.625	52.83	0.254
evm.model.scaffold_29.128	49.77	0.161
evm.model.scaffold_29.671	60.68	0.416
evm.model.scaffold_29.436	54.21	0.498
evm.model.scaffold_29.454	50.43	0.031
evm.model.scaffold_29.589	50.17	0.016
evm.model.scaffold_29.642	38.2	0.049
evm.model.scaffold_29.160	50.9	0.234
evm.model.scaffold_29.169	54.16	0.604
evm.model.scaffold_29.183.1	49.36	0.632
evm.model.scaffold_29.654	52.61	0.526
evm.model.scaffold_29.627	51.92	0.634
evm.model.scaffold_29.244	52.8	0.709
evm.model.scaffold_29.503	53.57	0.02
evm.model.scaffold_29.103	49.88	0.152
evm.model.scaffold_29.132	49.63	0.64
evm.model.scaffold_29.755	48.55	0.705
evm.model.scaffold_29.164	54.97	0.969
evm.model.scaffold_29.109_evm.model.scaffold_29.111	52.63	0.968
evm.model.scaffold_29.66.2	47.71	0.106
evm.model.scaffold_29.775	45.2	0.498
evm.model.scaffold_29.187	44.73	0.013
evm.model.scaffold_178.4	46.39	0.893
evm.model.scaffold_452.1	46.24	0.024
evm.model.scaffold_307.205	48.97	0.038
evm.model.scaffold_307.283	55.05	0.033
evm.model.scaffold_307.437	49.64	0.27
evm.model.scaffold_307.250	52.75	0.03
evm.model.scaffold_307.167	50.68	0.308
evm.model.scaffold_307.264	48.61	0.19
evm.model.scaffold_307.195	53.88	0.603
evm.model.scaffold_307.59	50.74	0.025
evm.model.scaffold_307.150	54.68	0.335
evm.model.scaffold_307.370	53.93	0.011
evm.model.scaffold_307.54	50.75	0.748
evm.model.scaffold_307.273	52.09	0.153
evm.model.scaffold_307.238	55.18	0.47
evm.model.scaffold_307.109	43.6	0.417
evm.model.scaffold_307.228	48.59	0.074
evm.model.scaffold_307.123	53.55	0.578
evm.model.scaffold_307.232	45.35	0.111
evm.model.scaffold_307.75	52.38	0.176
evm.model.scaffold_307.113	54.41	0.093
evm.model.scaffold_307.231	41.41	0.111
evm.model.scaffold_307.322	51.11	0.101
evm.model.scaffold_307.403	46.03	0.088
evm.model.scaffold_307.419	44.9	0.543
evm.model.scaffold_307.425	50.15	0.873
evm.model.scaffold_307.263	52.72	0.55
evm.model.scaffold_307.25	36.61	0.437
evm.model.scaffold_307.63	59.68	0.545
evm.model.scaffold_307.251	49.52	0.618
evm.model.scaffold_307.230	44.14	0.04
evm.model.scaffold_307.415	54.77	0.029
evm.model.scaffold_307.10	53.05	0.093
evm.model.scaffold_307.355	52.09	0.097
evm.model.scaffold_307.274	50.97	0.224
evm.model.scaffold_307.18	45.55	0.306
evm.model.scaffold_307.58	57.89	0.355
evm.model.scaffold_307.27	55.65	0.108
evm.model.scaffold_307.435	55.3	0.177
evm.model.scaffold_307.114	52.33	0.53
evm.model.scaffold_307.144	47.78	0.712
evm.model.scaffold_307.400	57.1	0.131
evm.model.scaffold_162.116	61	0.08
evm.model.scaffold_162.48	54.94	0.015
evm.model.scaffold_162.107	39.93	0.033
evm.model.scaffold_162.203	48.04	0.264
evm.model.scaffold_162.75	49.89	0.133
evm.model.scaffold_162.180_evm.model.scaffold_162.181	53.37	0.069
evm.model.scaffold_162.189	50.02	0.377
evm.model.scaffold_162.30	53.79	0.643
evm.model.scaffold_162.33	52.17	0.408
evm.model.scaffold_162.238	49.29	0.008
evm.model.scaffold_162.156	49.14	0.196
evm.model.scaffold_162.141	46.61	0.02
evm.model.scaffold_162.34	56.47	0.259
evm.model.scaffold_162.2_evm.model.scaffold_162.3	43.9	0.191
evm.model.scaffold_162.40	51.95	0.296
evm.model.scaffold_162.13	48.1	0.586
evm.model.scaffold_162.158	54.41	0.017
evm.model.scaffold_162.59	48.42	0.472
evm.model.scaffold_162.231	52.32	0.03
evm.model.scaffold_162.37	61	0.174
evm.model.scaffold_162.114	52.99	0.41
evm.model.scaffold_162.258	46.69	0.03
evm.model.scaffold_162.233	50.63	0.189
evm.model.scaffold_162.207	53.65	0.27
evm.model.scaffold_162.256	54.09	0.228
evm.model.scaffold_162.65	50.27	0.737
evm.model.scaffold_162.73	54.18	0.631
evm.model.scaffold_162.241	46.28	0.111
evm.model.scaffold_162.99	50.1	0.223
evm.model.scaffold_162.201	54.32	0.07
evm.model.scaffold_162.227	46.71	0.44
evm.model.scaffold_162.139	50.33	0.607
evm.model.scaffold_162.186	50.17	0.417
evm.model.scaffold_162.117	61	0.355
evm.model.scaffold_162.56	41.62	0.566
evm.model.scaffold_162.228	56.66	0.437
[truncated: 3,895 more rows]
