# Supplementary material for: Comparative Analysis of Codon Usage Patterns in Nuclear and Chloroplast Genome of Dalbergia (Fabaceae)
Source: Genes (Basel). 2023 May 19;14(5):1110. doi: 10.3390/genes14051110 (PMC10217945; doi:10.3390/genes14051110)
Supplement: Supplementary file 1 [file genes-14-01110-s001.zip › Supplementary Excel S9.xlsx]

## Sheet: leaf-atcg_5
Indicators
T	C	A	G
32.211	62.511	10.274	27.243
35.828	36.267	11.589	11.34
13.106	431.273	10.916	57.041
19.755	19.412	19.698	13.521
37.53	34.4	16.909	17.724
28.135	110.75	98.265	15.33
23.597	30.355	16.383	21.946
16.215	14.275	40.422	29.733
34.685	19.693	60.458	40.964
29.624	12.13	14.295	17.862
37.337	17.328	20.129	27.247
10.141	21.01	10.519	15.547
19.285	65.437	32.118	38.169
35.458	262.018	144.226	10.325
75.121	40.086	69.903	29.785
48.94	70.747	74.286	38.966
17.025	20.32	10.598	90.085
27.928	62.151	21.492	10.718
31.362	302.801	11.94	15.366
133.24	57.932	20.631	57.863
16.171	59.361	25.937	106.343
14.597	39.067	10.1	34.471
50.616	137.131	378.507	29.957
44.369	45.839	13.285	58.566
495.985	18.403	29.718	20.317
38.959	22.975	11.378	151.572
10.698	103.766	32.387	50.784
32.282	19.024	10.444	13.349
128.345	11.08	38.446	32.23
60.84	55.159	22.134	30.145
10.747	27.787	10.107	13.794
22.159	35.834	19.789	312.519
65.669	139.597	26.268	65.356
65.384	11.051	37.638	11.131
36.364	11.141	28.934	3789.21
27.522	33.221	10.593	20.546
44.342	81.044	14.66	15.019
21.152	353.399	30.224	700.848
57.311	28.382	13.348	20.934
93.378	15.054	14.832	23.945
93.918	50.486	14.834	19.312
81.741	15.391	154.063	35.114
78.859	15.147	19.966	16.063
50.563	20.52	17.413	54.5
18.651	97.068	1305.81	143.972
16.492	44.432	11.29	76.636
10.218	32.282	15.65	527.664
68.167	27.479	15.188	13.735
52.762	18.124	46.279	15.892
38.324	10.085	12.032	22.174
24.873	325.665	41.098	1165.56
82.244	22.937	38.199	10.034
35.486	22.707	12.893	288.562
17.161	29.023	10.445	46.999
30.902	16.758	18.38	18.116
117.16	17.304	56.157	61.867
41.466	42.513	14.126	68.996
28.399	41.854	22.923	15.472
20.468	59.904	17.948	61.45
26.906	35.469	27.356	273.517
13.972	25.254	35.681	22.741
59.692	95.283	10.041	11.794
16.82	11.346	15.896	38.676
23.8	108.744	12.328	16.676
12.528	190.352	60.018	2830.09
42.261	95.813	33.74	101.395
30.448	136.32	51.201	275.277
16.648	20.807	12.236	39.432
52.456	717.654	90.164	1912.36
114.399	36.461	31.317	3520.39
15.296	68.447	16.583	66.505
362.883	40.149	30.314	152.915
14.208	10.984	77.733	13.336
46.076	171.107	61.354	17.809
21.725	11.784	251.461	10.002
53.558	10.387	110.57	17.114
10.458	37.028	173.734	16.688
41.775	11.956	12.12	77.914
28.945	25.238	16.832	235.166
130.61	29.51	159.673	66.511
12.881	152.173	68.415	27.678
76.685	79.214	31.727	14.649
10.626	34.879	10.874	20.949
123.572	11.581	672.478	166.22
12.345	14.664	23.273	105.734
41.36	44.74	43.346	31.961
21.386	10.771	77.597	380.173
30.637	15.578	21.682	18.929
17.605	47.064	41.757	57.413
14.407	11.308	48.154	73.395
32.412	63.041	24.769	16.701
30.229	48.906	16.137	21.378
49.308	34.015	22.753	10.978
21.515	45.1	11.662	78.892
109.001	19.183	165.418	85.768
10.716	16.498	56.816	46.89
39.591	15.467	20.983	136.567
10.094	31.601	35.36	57.06
10.626	84.106	20.378	15.926
76.754	147.438	16.005	630.558
214.92	45.524	17.037	23.124
33.886	98.161	37.085	161.585
35.62	57.327	11.429	40.566
10.81	74.605	66.836	44.221
82.304	48.18	18.161	14.772
116.561	28.924	21.585	24.209
59.749	14.586	29.572	23.788
50.404	17.578	29.268	86.929
27.137	10.145	10.78	10.685
34.875	51.718	41.085	31.763
47.006	16.53	47.374	602.227
48.843	48.447	18.204	12.625
13.248	107.066	13.144	128.793
58.435	30.798	64.648	10.889
10.47	35.499	16.379	19.321
20.48	27.167	38.469	62.596
23.605	130.736	82.928	18.71
13.498	14.116	10.714	270.379
14.244	84.423	11.315	119.181
12.407	11.419	56.161	12.547
12.687	13.516	61.989	21.764
10.653	26.236	24.192	39.109
16.177	55.159	21.603	67.577
54.159	33.795	69.981	12.297
26.727	30.241	19.061	14.972
11.626	314.552	91.073	81.843
10.285	10.623	17.525	23.131
29.991	15.769	55.261	21.871
13.252	22.003	49.56	16.973
65.319	23.149	15.044	45.523
29.41	26.979	50.924	14.786
12.967	87.057	14.259	2850.16
21.188	213.225	248.823	22.012
13.344	14.894	108.62	164.859
30.426	11.898	43.828	14.988
26.158	27.777	11.602	15.532
11.244	12.576	16.4	19.775
10.697	19.023	45.125	168.202
95.771	16.102	15.654	15.045
222.244	105.973	305.826	10.873
21.896	64.702	27.735	13.955
19.062	149.674	10.78	81.14
20.07	310.569	11.438	12.256
13.988	124.648	294.044	353.322
10.294	28.512	45.285	38.745
65.118	13.319	73.275	75.859
15.079	15.941	23.855	152.962
28.678	35.083	76.705	110.671
26.402	115.878	53.228	28.577
29.507	77.406	12.178	43.773
16.626	361.589	17.486	116.47
10.713	15.001	10.008	20.495
10.418	26.715	15.341	27.495
10.908	38.706	15.868	75.388
33.799	12.161	22.554	25.259
36.812	24.376	11.83	569.931
449.439	19.028	23.065	130.005
54.746	18.41	14.408	69.066
26.552	24.984	103.188	15.536
28.23	16.44	19.232	19.915
39.103	344.442	238.01	391.846
15.556	225.728	19.14	120.716
21.519	18.218	19.982	60.215
41.25	98.706	30.546	840.892
60.403	44.885	10.096	26.54
19.281	16.277	10.703	54.134
11.43	41.624	11.599	14.528
27.205	29.179	15.136	17.094
37.948	33.33	13.585	10.657
20.37	77.02	15.613	37.825
10.482	181.237	18.091	23.273
11.144	29.393	80.119	86.27
15.795	108.012	11.555	143.551
30.54	16.817	31.54	170.838
13.789	14.675	10.007	80.774
130.235	182.765	64.933	10.351
28.235	17.658	12.877	338.811
26.84	17.228	54.448	20.155
10.31	35.305	15.09	334.032
12.19	10.695	58.547	69.388
12.627	11.386	10.943	112.6
39.09	277.65	13.576	14.74
13.856	185.709	11.539	47.619
11.286	13.173	21.799	1544.53
23.663	48.585	21.192	10.271
15.173	24.201	20.254	142.816
20.052	88.434	51.185	34.106
27.735	18.19	21.953	11.763
28.784	18.283	18.331	16.094
21.398	54.49	54.121	70.955
198.451	21.755	450.7	14.304
12.673	35.723	16.756	310.719
52.101	55.971	14.362	35.71
11.861	16.139	25.367	28.416
26.493	26.479	10.677	17.381
22.755	21.148	20.585	144.578
43.82	36.156	23.619	14.913
21.89	36.649	27.447	17.001
19.585	16.367	13.621	23.915
10.244	83.035	14.847	52.617
14.852	54.613	14.361	76.098
15.388	54.701	491.382	34.479
96.011	166.594	10.186	12.203
39.585	347.489	33.82	160.305
24.661	29.278	18.549	54.681
78.262	18.174	13.618	12.126
19.373	84.389	83.116	51.871
24.444	22.217	41.554	43.241
26.589	10.094	48.555	20.216
25.675	74.953	17.065	29.279
128.702	33.903	12	20.172
49.049	49.038	32.755	28.947
11.514	13.415	18.85	28.442
19.896	102.259	10.788	18.37
13.42	88.13	34.649	11.19
32.201	44.235	25.761	162.554
98.672	235.313	32.133	11.299
15.551	143.287	20.022	19.446
110.394	47.28	27.383	12.57
13.717	41.899	16.983	111.83
37.35	89.703	28.96	24.808
101.386	48.259	19.218	20.774
17.022	113.701	18.023	22.7
17.901	17.435	22.963	30.631
29.406	33.186	45.352	25.543
42.578	28.084	13.283	17.903
20.365	50.403	29.788	75.225
39.532	17.168	12.368	32.831
21.856	27.496	145.265	49.793
23.1	31.506	62.524	28.489
35.289	19.171	14.674	12.743
11.128	12.127	45.638	210.737
11.914	23.424	14.447	34.43
20.273	105.393	10.073	93.226
28.689	396.268	18.376	12.072
26.793	112.923	21.442	30.076
11.751	21.347	10.242	61.167
10.971	19.926	35.893	119.457
940.174	68.634	41.377	12.793
13.767	13.044	13.234	532.421
17.424	19.32	45.411	18.148
13.163	30.233	41.001	45.848
16.04	36.008	10.938	11.389
25.399	156.884	28.651	24.023
11.093	10.517	16.159	16.951
34.085	100.152	10.69	13.434
21.79	14.418	21.35	18.36
47.646	18.69	32.079	111.194
32.752	51.131	18.417	26.745
48.141	32.135	2914.72	12.982
13.676	57.986	35.145	47.074
13.78	15.272	16.884	83.464
19.984	24.939	13.136	25.256
23.633	16.063	47.432	17.352
16.437	63.461	22.568	195.754
12.692	44.772	61.527	10.145
14.012	22.307	11.434	78.485
11.449	11.713	18.293	24.768
19.637	106.94	75.599	36.7
13.988	10.976	15.311	59.663
26.046	26.462	11.852	174.576
25.178	78.424	17.831	29.372
992.1	177.02	125.746	50.324
20.203	49.799	38.929	413.407
30.04	853.457	198.231	20.035
11.609	41.468	30.108	29.506
14.325	79.582	58.763	356.682
10.318	431.867	18.54	59.988
17.699	70.912	61.364	63.46
18.45	19.394	184.544	29.337
30.303	33.248	27.327	37.195
20.584	24.107	21.508	19.642
14.642	22.589	18.499	21.004
36.79	57.162	68.534	238.929
10.42	13.333	21.149	16.011
42.288	67.541	15.472	848.059
48.103	25.7	18.793	91.994
13.078	22.69	14.683	20.302
15.745	19.917	31.799	64.676
24.336	29.297	30.071	67.811
14.772	18.473	94.989	11.775
30.396	20.038	20.446	14.999
13.121	256.661	25.982	73.025
25.317	15.599	21.501	17.212
20.535	16.179	66.44	23.632
42.085	17.905	53.035	22.02
22.351	54.914	33.188	18.328
12.394	28.071	11.424	133.559
61.18	24.649	131.477	11.845
24.1	40.253	130.353	27.591
70.93	12.401	13.85	49.169
112.026	35.363	66.077	276.029
48.049	12.365	14.79	51.026
80.143	39.139	12.741	12.134
15.507	25.325	14.936	19.752
10.353	77.429	18.711	28.117
19.394	42.728	71.956	41.162
14.122	34.48	25.448	33.977
10.274	158.355	55.723	39.679
426.244	11.589	10.108	89.383
29.212	55.434	71.738	37.731
40.175	264.669	31.34	16.613
32.317	28.928	14.624	10.025
38.301	19.64	217.063	72.871
49.295	10.913	53.741	10.451
15.206	24.432	34.447	30.148
17.391	50.372	23.828	171.936
15.822	33.639	19.541	29.138
14.251	36.849	20.432	50.774
24.006	284.565	49.63	25.262
13.866	365.574	10.034	47.733
31.783	23.593	19.841	10.14
14.561	22.633	18.798	29.772
17.096	32.43	16.872	29.218
73.997	20.227	22.874	64.48
10.568	12.644	17.028	35.88
16.161	27.552	32.697	15.43
25.399	17.816	17.333	11.049
621.767	43.649	104.118	29.197
19.578	57.947	12.981	46.77
35.357	11.313	15.995	4417.37
349.362	33.617	11.462	690.099
42.183	51.932	20.718	1126.41
60.022	11.253	278.818	12.093
26.374	62.721	25.588	1253.44
83.172	11.274	13.084	11.365
41.444	17.986	22.724	21.21
57.475	142.331	84.825	12.111
19.497	17.546	14.169	147.691
773.174	67.198	10.961	208.675
10.398	45.786	99.274	10.487
10.955	4342.42	24.601	49.386
13.153	93.782	49.937	218.029
12.807	66.208	26.556	17.328
60.994	272.794	24.993	16.608
18.39	98.807	10.458	30.013
36.181	117.763	12.837	37.282
22.418	14.658	10.668	35.569
40.026	50.112	12.005	30.775
32.527	15.426	10.202	127.179
10.642	17.623	223.532	62.626
20.668	53.117	14.04	24.817
12.236	33.105	15.048	126.827
14.443	27.043	24.133	14.794
16.074	15.391	20.197	59.975
31.738	15.845	79.919	18.304
591.418	21.332	23.012	30.255
15.239	28.976	14.864	396.131
20.651	16.072	12.689	15.336
28.337	24.947	30.548	141.394
26.953	27.044	65.941	46.353
12.115	10.097	15.358	77.67
30.684	16.391	22.287	81.324
12.927	42.431	43.334	63.135
94.088	11.589	35.941	15.495
30.632	48.607	57.52	38.75
15.195	26.404	25.672	15.688
50.734	10.692	10.412	11.565
53.708	43.189	341.402	10.733
22.294	30.748	42.944	63.708
10.647	21.001	10.822	1158.99
52.64	16.618	30.006	18.894
29.344	11.179	17.765	110.577
87.285	19.699	32.986	29.5
17.949	844.219	20.656	50.897
10.177	18.155	18.743	106.547
13.589	181.402	19.263	485.385
22.547	12.391	19.9	24.921
14.373	110.736	25.541	38.545
33.214	195.789	20.408	28.644
11.63	46.459	14.239	38.41
34.204	22.476	12.657	13.964
11.839	52.346	11.131	31.134
34.464	38.404	17.439	43.851
12.216	79.832	21.643	79.255
35.199	20.076	15.801	12.31
22.583	10.018	16.393	15.843
22.954	58.021	53.446	20.768
14.934	29.845	125.473	105.174
85.821	13.428	15.594	73.705
12.663	54.089	13.485	689.106
11.283	15.977	11.4	59.848
33.878	43.224	22.405	139.503
10.564	12.307	58.26	144.125
16.028	54.659	20.729	22.482
32.105	52.189	76.861	14.747
19.71	91.892	51.509	44.017
66.397	39.584	56.745	123.311
15.892	62.062	244.541	30.037
12.621	115.228	13.326	20.278
27.341	26.383	26.487	95.276
37.714	96.529	23.921	15.642
33.604	82.393	13.371	30.12
35.152	21.902	10.552	140.373
13.015	47.387	10.885	60.317
47.779	15.777	41.912	135.422
18.225	22.259	12.352	10.499
18.603	65.302	10.499	217.645
14.446	39.592	41.883	13.473
14.989	534.945	13.751	14.481
10.791	103.579	34.365	33.559
32.668	10.09	48.425	12.928
14.925	14.539	31.905	48.176
114.607	10.913	35.534	84.968
10.148	62.842	299.882	371.845
27.715	67.976	11.538	39.291
10.84	121.284	17.893	10.651
11.49	51.095	34.644	22.516
409.108	51.161	14.619	63.394
41.133	95.271	17.25	24.834
37.06	23.095	10.869	108.697
10.156	35.182	159.23	11.901
11.261	19.494	140.737	201.518
15.741	14.397	39.119	100.101
52.194	82.851	91.236	16.995
27.544	14.587	10.047	22.127
11.113	160.177	65.787	44.536
17.981	25.698	29.055	68.708
22.601	19.307	27.281	25.334
87.378	47.41	34.335	22.132
100.117	13.525	10.745	20.972
20.918	16.194	24.322	19.725
73.091	25.085	71.929	10.509
22.479	14.011	10.515	46.547
23.876	11.432	13.408	133.092
100.794	22.129	22.451	83.274
17.882	101.8	183.441	389.031
14.386	25.036	36.879	140.91
65.631	11.206	30.089	124.671
22	10.274	32.496	13.511
231.61	43.399	17.903	22.812
18.994	17.15	89.798	24.177
14.403	80.434	26.123	34.043
14.081	20.492	10.477	39.13
88.04	20.205	12.341	38.745
45.799	102.694	12.537	69.71
42.202	13.696	43.68	43.712
13.153	96.607	19.843	157.623
88.832	23.764	22.946	12.931
16.636	53.625	70.887	35.177
204.764	10.457	68.19	113.923
288.149	79.648	11.154	36.802
111.748	279.754	11.483	235.253
25.96	13.519	40.477	14.41
76.753	188.823	111.41	17.287
38	29.182	365.128	46.608
32.616	17.371	20.012	19.407
35.996	158.274	13.332	62.258
24.865	10.932	34.134	134.073
23.244	13.751	14.919	69.219
43.137	285.399	41.82	140.818
27.612	25.683	18.642	73.334
114.563	19.321	14.447	23.565
395.193	13.482	177.677	18.049
28.694	30.451	13.275	10.013
63.288	194.193	34.874	40.051
18.744	113.845	17.857	75.799
21.29	25.23	12.347	21.248
45.442	110.8	34.688	17.041
35.908	15.209	50.57	12.565
11.88	86.761	28.152	93.823
36.619	37.63	15.422	21.513
28.784	113.215	19.063	52.091
13.002	33.744	32.042	25.619
85.327	160.69	29.268	139.869
41.17	26.684	80.174	21.204
123.077	11.315	23.637	10.149
13.918	31.754	40.687	9801.17
22.122	14.565	43.89	61.952
33.987	11.84	21.922	81.468
36.026	12.537		11.962
12.543	40.545		6143.03
37.129	170.787		13.319
10.96	183.072		15.444
20.327	10.858		32.461
16.851	56.908		73.673
15.156	33.64		255.217
11.664	18.947		13.832
11.866	141.518		4527.92
23.831	51.381		108.636
48.382	394.729		16.043
14.407	15.061		98.847
12.061	559.845		11.112
12.281	65.004		279.07
15.708	80.487		178.895
19.254	53.674		48.373
33.497	58.86		15.781
32.38	48.32		356.054
54.526	10.191		20.321
17.944	10.667		107.089
38.474	19.562		787.146
10.409	86.31		27.486
38.296	25.387		23.433
103.493	29.042		126.064
17.841	27.618		12.651
14.186	19.761		15.93
10.063	11.873		14.215
46.8	78.847		132.691
10.756	31.221		28.724
37.877	39.183		212.371
53.379	17.537		19.277
51.22	11.628		93.836
62.719	183.1		16.284
155.354	19.323		10.46
12.472	25.572		85.803
12.628	75.004		15.693
23.068	23.548		17.08
26.812	16.001		21.976
55.321	285.724		46.174
35.322	36.325		424.861
24.707	193.6		19.928
17.296	335.889		59.37
31.675	11.8		10.749
19.683	12.887		19.215
23.471	20.786		88.087
38.16	92.714		15.225
16.751	231.538		264.447
53.49	64.992		18.449
14.806	25.175		14.607
10.572	109.445		44.242
17.285	29.06		98.461
29.177	27.127		28.815
58.708	107.677		16.895
10.039	858.876		26.207
12.417	73.711		421.562
40.068	49.12		19.105
22.509	84.948		179.884
247.463	46.155		760.841
13.741	622.188		41.396
41.299	38.564		26.351
55.485	25.778		22.18
96.803	17.343		18.987
50.502	24.6		35.007
315.473	10.604		14.829
14.371	23.693		57.223
246.933	20.075		121.043
11.779	77.878		43.337
37.354	12.714		98.288
32.97	29.08		11.068
36.638	14.618		13.869
38.167	29.209		24.471
28.749	16.536		73.395
20.861	14.365		337.861
34.304	26.81		17.132
29.21	22.954		218.576
16.68	19.516		133.967
31.796	63.425		20.643
10.993	33.939		28.092
16.651	10.069		16.787
558.477	84.616		21.545
50.097	94.664		32.328
17.03	113.649		27.71
124.78	551.662		22.169
16.434	112.665		42.922
61.873	25.729		105.578
58.033	34.849		38.386
43.924	16.335		58.7
55.917	232.017		17.764
51.31	22.712		47.852
51.952	26.244		11.252
39.189	10.898		352.616
14.558	17.599		25.126
18.94	27.675		36.293
22.326	89.294		28.375
14.735	204.151		203.076
18.712	17.567		45.486
89.042	69.357		786.206
12.645	562.91		91.109
10.292	145.526		26.797
64.266	22.118		82.106
134.818	90.667		25.556
13.904	11.773		28.2
92.595	293.396		24.312
62.774	11.216		246.681
19.628	70.228		83.958
40.336	47.676		84.912
134.411	393.823		649.278
10.556	37.997		22.106
123.244	70.604		41.76
24.789	62.01		36.049
105.652	63.008		106.463
55.042	238.965		78.539
14.945	35.341		71.768
14.296	63.119		634.196
34.293	65.132		25.669
50.928	31.918		11.224
1304.21	28.163		31.229
130.642	13.836		10.277
15.457	149.481		89.158
55.23	46.924		48.418
76.225	11.677		14.281
37.143	15.91		44.915
25.686	88.912		72.262
15.763	11.85		112.261
2330.76	17.871		46.875
29.516	59.409		13.393
63.044	48.928		11.484
15.492	12.864		38.484
12.793	36.982		10.878
15.775	19.385		25.291
130.327	15.113		55.478
11.168	47.321		53.589
36.437	333.307		66.288
12.097	22.015		47.339
16.524	148.226		38.274
3227.67	22.799		29.402
101.176	60.275		113.726
15.358	105.493		24.638
48.548	106.546		201.551
18.492	96.035		97.994
22.479	65.43		77.544
10.651	23.308		15.524
34.023	1403.3		12.606
48.051	25.971		38.769
14.233	130.785		1085.12
40.114	127.176		16.556
20.215	129.231		17.891
13.933	36.25		17.975
20.279	58.398		12.148
71.355	179.294		38.05
75.794	13.198		51.85
30.401	19.408		27.091
1179.08	44.758		41.735
118.857	28.411		39.492
29.092	20.506		149.591
40.042	13.045		18.779
18.779	223.251		105.482
48.822	10.089		11.525
53.104	143.169		37.694
10.044	31.872		33.937
23.1	207.698		34.224
85.692	11.662		11.997
11.555	70.973		49.221
10.69	17.316		24.527
15.743	64.793		102.558
10.978	35.543		76.147
34.437	22.797		34.099
16.585	25.48		218.046
36.899	10.685		22.861
13.211	28.424		70.004
158.003	19.245		128.487
16.486	49.551		54.248
35.007	76.093		129.659
12.976	38.381		14.808
173.686	67.652		20.364
49.099	41.857		85.851
26.295	40.928		59.346
16.172	32.4		16.699
11.999	25.078		55.914
19.024	11.253		10.915
57.095	38.76		51.265
17.05	61.328		26.904
156.998	21.413		24.081
114.871	242.726		217.59
13.6	32.096		23.273
44.545	12.162		10.344
184.416	20.316		14.34
15.652	24.67		29.873
18.453	13.811		88.858
111.524	36.567		148.594
16.531	41.425		94.742
49.914	14.815		16.528
34.862	16.012		48.808
15.711	70.332		18.015
14.339	52.33		39.451
39.826	20.584		35.427
14.562	14.362		15.425
11.076	182.512		10.323
53.931	36.825		13.469
10.158	14.227		66.402
22.806	14.707		18.682
23.239	200.792		17.435
140.829	25.712		58.821
149.887	108.609		55.55
15.891	14.813		12.292
31.031	58.654		33.998
30.163	70.399		47.998
27.543	22.285		69.82
33.779	32.351		2032.91
22.776	40.936		59.266
37.991	46.187		12.199
79.155	19.175		24.718
10.376	20.448		18.926
28.856	20.187		12.567
12.436	1859.5		15.83
25.63	971.901		35.493
14.028	14.516		79.422
17.708	29.909		91.475
177.837	16.127		273.185
28.614	451.286		37.598
69.295	30.78		15.942
14.844	14.493		11.195
20.775	27.355		123.428
52.569	33.644		84.536
12.11	700.14		11.787
40.909	21.984		48.259
64.083	13.807		16.815
48.674	104.439		24.526
117.375	22.153		49.554
14.044	16.295		19.224
16.694	158.572		233.164
14.604	21.391		16.205
11.002	16.301		15.853
11.417	22.996		23.982
55.242	29.222		106.741
50.986	752.25		50.39
64.006	33.25		10.037
112.974	11.877		15.105
16.663	13.122		37.889
39.581	11.541		15.049
44.301	65.185		11.607
93.265	20.535		59.217
12.676	72.955		11.259
128.719	48.396		24.787
11.391	56.654		161.37
13.041	32.458		30.781
18.556	189.138		11.674
68.871	22.146		10.908
224.636	15.832		18.355
92.648	16.719		19.566
82.702	61.387		21.758
20.333	75.068		70.25
14.264	21.635		29.653
10.277	23.203		30.677
29.333	31.107		159.145
12.022	38.789		244.163
18.913	13.886		17.793
34.811	71.122		31.252
31.592	38.574		10.2
17.107	62.87		23.891
12.995	28.893		20.506
12.651	63.924		10.203
19.73	15.469		89.118
20.988	11.149		69.631
138.441	45.87		34.232
12.563	14.601		19.619
134.954	136.12		304.706
63.471	57.254		37.918
70.878	17.876		13.792
13.907	24.274		21.906
26.942	15.658		421.437
40.136	10.623		43.467
30.571	57.741		22.73
22.759	19.907		10.538
31.217	272.734		19.621
23.64	1944.61		45.241
22.179	11.775		23.162
16.845	57.449		13.56
16.098	62.16		12.644
23.241	55.577		10.319
73.902	53.442		61.844
21.89	15.837		471.763
109.267	18.236		233.094
11.262	99.553		18.878
149.785	145.144		23.058
42.942	25.695		34.416
12.568	24.544		108.277
71.688	123.533		28.328
35.281	22.264		44.429
12.112	12.875		598.53
28.501	37.22		32.781
34.068	29.93		17.418
27.007	87.588		34.565
22.115	21.535		699.913
23.891	43.66		30.799
89.724	10.422		39.988
40.375	37.972		25.117
12.097	13.182		17.215
13.994	373		29.369
19.976	34.738		286.44
22.522	63.463		2482.2
22.727	39.201		113.904
35.91	50.149		38.846
16.328	32.477		16.897
14.417	25.709		14.224
20.24	25.688		152.73
45.951	78.062		24.764
18.188	215.176		1397.58
13.452	19.692		25.198
16.69	151.225		16.554
14.348	31.587		10.019
106.173	47.964		15.607
24.758	17.231		23.52
28.429	15.839		18.529
39.662	74.807		10.987
24.769	19.053		386.913
15.671	435.948		23.114
49.43	15.624		13.87
31.42	45.775		58.959
14.561	95.018		25.407
68.374	14.348		97.796
295.1	309.068		2315.63
29.083	35.224		79.81
25.227	10.47		18.665
16.622	17.323		11.771
31.798	11.53		89.233
534.717	79.812		120.881
25.839	22.193		157.8
12.632	14.317		21.667
84.336	20.766		150.444
53.865	47.256		15.64
24.531	26.001		21.266
25.166	53.847		77.398
103.401	11.841		39.386
260.474	114.323		12.817
46.989	77.566		39.659
27.993	10.347		58.664
35.172	16.025		54.963
11.096	27.257		113.775
11.899	54.344		41.906
18.232	13.485		31.616
19.219	18.272		12.795
28.655	92.523		41.073
72.09	31.677		100.473
10.815	22.473		544.594
15.005	13.343		62.451
26.241	11.543		40.948
27.403	24.088		12.148
10.399	56.768		45.277
10.231	46.08		269.041
240.232	41.39		46.707
37.882	59.873		38.874
94.978	16.621		10.154
40.624	24.506		20.041
106.548	11.659		423.36
49.033	649.526		12.447
16.543	39.341		40.019
10.274	81.275		164.814
53.864	64.686		17.166
14.853	14.49		10.988
215.905	20.705		50.118
18.158	13.6		13.251
103.29	381.298		197.026
57.006	32.289		16.573
14.912	16.973		32.407
56.494	16.232		44.68
50.304	252.063		19.13
114.46	2060.72		12.94
10.057	38.184		39.228
88.845	31.236		17.739
49.088	24.559		334.027
20.223	133.594		25.998
17.493	12.241		94.281
43.88	19.692		16.921
12.712	37.54		29.022
19.829	124.29		14.061
35.386	18.831		75.301
12.221	118.61		19.021
28.449	66.771		16.047
17.325	22.64		37.47
21.343	28.631		36.418
215.952	16.286		51.923
20.215	100.792		19.387
11.47	14.174		70.801
29.452	123.259		16.484
25.985	27.888		16.59
15.017	114.66		14.367
11.398	43.034		19.148
10.402	11.503		66.135
23.381	184.452		21.292
19.108	11.62		31.174
11.847	44.899		20.821
24.652	104.706		50.765
11.743	141.142		14.756
10.919	3035.48		48.486
235.564	31.68		33.188
10.723	18.189		11.597
20.923	379.455		202.901
41.713	21.831		49.033
122.99	21.751		258.013
13.454	27.284		20.572
77.643	14.712
157.046	70.949
20.227	18.482
19.454	30.238
28.401	789.096
49.572	375.133
43.92	41.992
57.157	38.919
13.098	19.224
14.238	42.87
12.378	25.211
199.976	10.927
35.665	29.262
134.393	23.453
28.734	45.851
12.489	32.73
23.781	10.43
49.806	153.325
47.829	432.047
10.464	97.798
19.459	11.295
41.219	58.769
25.417	12.519
45.119	50.652
30.244	182.135
52.699	28.845
28.308	26.364
77.104	13.217
20.426	21.812
12.306	42.063
12.887	24.043
12.732	36.431
270.954	177.241
24.729	114.067
81.801	24.283
12.472	37.581
22.618	216.097
38.862	26.603
18.337	13.724
61.419	131.477
237.499	38.294
161.702	11.34
14.77	14.004
77.48	12.282
16.177	130.927
45.439	10.047
45.108	36.906
30.495	1049.59
15.604	30.704
16.835	30.044
20.649	72.505
20.244	41.422
11.161	14.44
19.046	75.791
36.744	97.981
194.269	28.798
77.411	41.059
10.379	14.278
19.233	148.176
13.717	20.148
40.46	325.826
130.561	46.334
168.836	106.145
10.157	53.108
15.618	11.554
11.779	10.405
22.89	316.497
31.265	44.936
91.758	35.686
55.959	48.061
36.995	63.628
51.577	36.679
11.083	26.702
150.766	55.972
21.772	10.582
20.407	27.114
15.42	29.197
218.415	15.63
20.738	219.665
26.159	2220.07
43.966	11.437
24.675	97.871
15.378	44.713
14.404	85.633
127.854	54.794
26.27	10.308
20.958	69.455
114.314	120.353
17.113	851.776
152.336	193.87
33.659	17.227
11.611	12.414
29.214	36.804
31.665	53.114
17.887	106.618
12.817	48.377
12.723	15.288
42.634	51.957
34.443	14.82
74.093	17.869
25.577	27.114
18.877	16.899
20.618	25.33
31.564	13.248
37.513	13.521
14.448	14.215
16.979	45.6
15.924	46.752
26.387	135.011
28.951	148.388
177.58	20.149
26.225	502.796
15.119	182.691
36.848	32.344
13.366	12.81
12.025	36.769
65.365	29.656
25.364	45.99
19.653	421.383
35.359	183.698
104.918	38.207
17.358	14.773
12.461	17.093
50.63	201.857
43.344	51.645
97.545	12.35
36.642	45.57
32.062	22.001
53.787	22.053
15.26	77.199
34.651	22.5
33.201	29.538
24.809	14.403
28.029	461.525
10.596	15.255
35.589	18.391
21.05	13.534
14.622	31.869
24.627	29.725
32.115	54.353
41.698	45.579
12.403	11.637
49.766	102.847
16.52	25.978
215.046	27.993
56.777	13.274
40.678	133.793
11.695	10.671
13.692	142.316
14.407	68.325
11.703	16.05
12.302	22.423
11.998	23.406
10.661	94.297
13.72	927.564
29.335	467.514
20.046	126.615
33.378	20.811
71.747	13.282
39.099	53.67
30.698	36.326
36.07	150.541
10.195	24.056
11.489	43.331
237.597	68.816
31.406	94.735
36.741	53
12.674	52.081
49.523	11.922
33.534	77.654
27.104	373.87
154.088	37.785
16.271	150.743
13.373	13.086
20.321	48.716
14.027	10.431
30.495	55.114
15.118	234.753
29.938	53.484
35.958	117.306
21.604	15.184
22.63	10.433
11.054	201.902
16.448	13.425
20.757	23.595
51.015	11.753
32.459	106.103
11.766	10.328
19.498	98.885
36.739	47.461
12.362	34.763
11.258	38.658
719.196	112.904
43.476	64.738
28.675	23.612
530.064	34.216
19.504	39.711
21.455	74.683
39.045	23.133
10.489	21.841
16.105	143.821
11.702	24.069
10.735	16.867
130.203	12.042
14.351	29.581
356.697	15.584
17.461	47.393
20.432	89.023
32.917	11.326
31.929	39.864
17.189	156.136
21.705	113.038
33.004	14.941
12.526	14.457
19.747	20.067
28.413	10.885
29.288	70.205
13.129	19.289
26.168	11.348
83.103	11.206
26.984	29.195
89.319	69.925
19.59	16.146
24.233	25.997
22.451	44.519
15.786	31.757
11.28	16.344
10.281	10.513
40.658	18.905
24.77	21.509
11.083	22.323
12.149	37.514
26.723	88.959
36.724	45.061
10.327	29.786
11.829	70.596
22.03	237.635
14.921	208.754
29.092	135.78
11.413	18.983
17.917	12.978
56.604	48.843
234.02	15.479
10.573	26.909
119.592	39.943
16.782	99.629
15.712	31.429
35.276	17.449
23.2	23.081
14.836	1580.38
11.393	23.034
19.354	160.459
12.218	23.526
12.805	372.437
10.844	244.17
11.052	125.221
12.646	27.987
16.407	52.177
11.104	10.939
50.35	14.902
25.316	19.666
14.082	33.95
128.233	12.179
11.909	10.336
14.707	46.423
17.527	26.447
29.808	15.984
74.78	21.409
24.42	217.209
12.846	100.743
13.603	55.294
29.903	17.844
58.281	39.409
22.422	11.42
54.874	2017.26
10.612	346.005
60.044	79.71
19.789	46.461
59.039	10.439
192.107	29.647
11.169	15.847
10.544	185.504
62.986	41.312
14.064	31.173
41.008	68.989
11.009	56.13
201.135	10.117
60.189	131.819
32.945	1007
20.7	46.316
72.871	339.238
30.07	13.583
69.156	31.269
137.265	23.556
43.526	201.958
49.711	20.431
26.68	31.958
60.767	27.113
12.855	41.268
155.297	86.255
15.392	521.551
15.484	37.959
10.504	50.971
167.958	24.714
63.242	36.944
41.964	20.673
44.799	348.918
10.526	20.276
38.206	81.727
12.864	15.845
20.928	38.422
81.998	60.717
14.716	41.37
21.083	31.547
10.094	18.014
37.584	66.201
36.113	45.468
13.486	476.433
21.583	58.861
49.839	46.885
13.583	32.915
11.277	92.969
11.563	53.705
30.63	131.889
143.976	20.228
78.092	22.325
75.435	14.757
39.083	26.325
74.047	70.843
14.444	56.293
59.014	156.858
654.145	68.615
11.818	81.66
42.397	135.709
42.427	10.538
122.274	221.612
30.825	55.648
12.535	254.501
13.251	47.038
24.749	32.32
45.399	56.996
17.07	31.053
49.021	31.049
54.384	37.017
20.08	33.527
55.205
46.229
27.972
15.385
20.9
10.488
10.919
25.215
63.837
91.868
21.033
12.359
29.211
21.671
136.347
28.689
23.19
91.14
10.344
952.058
16.9
26.105
184.065
90.925
12.625
334.172
365.343
11.255
14.003
34.395
379.606
44.481
24.169
23.387
10.761
24.083
38.519
34.628
27.718
27.223
12.654
50.064
17.73
21.438
2105.94
40.715
128.095
15.972
12.819
55.5
31.714
73.863
18.828
35.968
17.826
11.022
29.662
52.511
10.594
14.762
11.666
13.785
53.771
22.838
13.308
31.861
131.432
11.887
326.863
20.378
70.364
10.904
55.337
22.678
10.235
27.036
21.07
28.679
15.21
34.332
11.31
30.894
13.607
17.992
12.551
32.226
10.248
28.007
45.76
443.558
17.205
18.65
98.374
41.738
10.818
14.809
34.399
104.368
267.287
143.926
29.313
24.023
17.114
11.603
20.626
35.417
76.132
10.894
21.143
21.492
10.667
24.9
50.172
17.067
76.153
138.258
37.685
144.429
25.812
49.245
27.981
29.926
14.928
104.161
22.26
10.987
110.48
15.068
107.994
12.419
16.145
13.26
24.317
306.458
164.473
179.318
18.2
16.562
43.938
19.232
15.957
111.309
54.591
32.558
16.284
56.644
29.28
29.43
23.516
22.53
83.449
10.734
20.662
24.522
22.79
29.521
35.383
10.678
26.492
28.889
10.51
11.887
11.567
124.139
15.507
18.174
15.627
11.339
11.134
11.252
63.849
129.998
21.634
15.943
10.085
1203.3
140.704
38.74
15.415
27.822
16.581
14.113
108.573
20.092
81.768
93.429
17.987
44.362
31.12
132.779
10.106
28.483
17.903
17.055
13.843
218.62
178.038
51.487
38.289
80.291
20.26
15.751
23.577
17.569
44.922
16.522
25.832
84.755
23.118
22.965
57.05
80.123
22.314
405.143
30.203
26.999
292.54
35.442
10.752
19.951
28.087
19.643
54.24
23.683
14.005
121.952
19.409
62.741
18.678
70.545
59.16
22.336
30.194
34.386
60.515
18.356
16.48
35.975
117.71
38.711
23.166
17.374
22.784
15.022
26.041
197.591
36.393
601.138
69.877
34.387
15.552
351.591
599.954
21.175
12.816
14.055
118.306
16.861
50.073
21.344
199.207
43.864
38.382
29.309
18.944
16.303
77.712
55.284
13.245
34.391
36.123
84.714
57.069
10.683
39.994
62.964
140.861
70.968
30.554
16.925
12.51
16.063
13.975
35.06
11.678
12.876
159.386
54.425
24.878
28.209
18.944
23.124
16.087
11.735
35.746
24.583
101.158
10.26
11.768
586.4
34.498
70.165
20.096
14.702
31.834
16.597
35.729
32.143
21.187
71.999
30.394
14.391
17.007
20.708
12.205
17.993
18.454
17.487
18.545
12.669
21.839
12.527
263.941
133.929
11.775
87.532
20.548
33.402
17.452
321.548
28.383
13.878
18.225
25.361
16.019
12.991
98.619
17.881
15.345
10.375
11.397
22.836
94.967
291.912
17.252
12.996
10.612
14.075
66.022
474.184
300.678
32.517
93.703
33.119
22.793
84.802
48.035
11.512
16.347
13.232
18.353
14.39
10.549
18.608
11.392
54.768
20.64
14.479
21.722
13.442
13.055
29
50.133
23.66
31.15
38.04
13.402
41.321
18.186
26.04
109.649
40.034
50.694
16.169
46.194
56.32
28.621
15.964
35.08
27.06
11.855
14.981
21.644
15.457
42.939
14.066
49.939
16.985
28.251
23.335
64.185
35.403
167.906
116.794
108.076
37.151
10.03
24.674
26.606
11.098
28.736
28.722
17.361
26.357
85.289
35.455
29.342
11.343
47.566
59.132
16.871
20.351
45.943
69.696
16.899
16.869
11.114
12.78
14.469
18.719
210.983
34.085
11.732
59.045
56.969
52.775
44.912
15.604
112.37
14.225
35.88
12.603
13.501
122.283
35.68
70.199
15.704
14.167
15.539
13.231
16.055
86.327
14.602
10.278
25.227
16.71
14.337
13.312
10.084
37.995
45.977
12.974
58.275
12.462
45.946
28.617
42.892
45.26
20.67
43.684
11.916
67.114
30.808
25.663
32.581
14.803
41.776
16.245
97.641
45.059
84.598
14.516
43.009
414.438
42.476
62.645
154.752
133.797
23.779
33.722
26.931
33.035
22.861
10.279
28.996
17.748
55.518
26.7
17.361
10.347
34.33
41.697
36.454
12.674
38.751
103.533
23.626
20.431
52.778
146.336
17.575
17.291
20.063
42.794
1652.07
261.469
217.625
27.784
55.398
12.519
28.176
10.96
131.587
47.109
25.604
28.968
32.222
11.942
20.631
12.634
94.426
101.778
103.094
15.773
132.329
51.702
12.987
64.703
21.869
10.063
39.671
12.951
48.39
10.411
15.516
32.009
24.366
31.369
56.231
21.04
13.377
39.549
14.844
18.199
12.058
15.764
28.481
17.293
25.782
29.377
15.303
184.63
24.06
19.3
33.457
36.528
94.136
42.108
69.744
69.059
47.238
96.206
50.12
38.95
25.758
27.735
90.681
12.92
23.946
2765.63
156.176
10.109
253.691
21.53
18.224
26.037
34.531
85.651
31.862
45.698
40.073
23.846
13.725
13.353
77.708
11.55
36.051
31.082
70.422
16.655
14.678
25.064
23.655
14.984
17.645
20.554
15.225
35.967
56.655
13.241
15.209
10.747
13.96
23.959
11.063
36.796
23.324
13.367
13.057
45.918
19.113
42.812
10.932
16.301
43.244
13.626
125.881
10.15
17.926
10.007
19.179
14.558
34.094
191.481
90.1
11.315
12.441
48.805
96.627
29.689
45.756
30.014
13.422
21.791
47.964
15.978
187.145
32.984
20.161
28.743
43.17
48.567
17.402
11.823
14.854
20.16
32.507
26.968
234.64
14.562
13.348
13.25
18.569
48.166
10.571
52.34
51.957
16.441
18.49
21.398
12.685
27.566
14.596
49.69
12.45
30.286
39.04
20.364
21.017
46.184
12.653
27.462
12.893
73.865
18.826
77.687
70.477
22.019
23.386
34.609
57.423
122.361
82.623
101.944
13.002
15.656
52.045
12.498
13.442
10.971
69.341
29.719
18.842
47.162
12.098
22.274
11.637
54.042
16.502
44.83
20.825
15.164
189.873
20.225
11.423
12.285
61.045
46.028
14.313
23.842
42.447
40.513
41.666
11.326
188.905
11.619
308.598
33.53
12.096
36.461
14.295
109.259
1668.49
26.674
39.802
15.202
44.507
17.795
67.445
13.139
86.245
10.307
13.81
77.052
12.601
60.574
26.424
17.101
13.115
57.589
86.264
10.422
32.326
39.294
29.082
10.906
13.326
110.83
26.342
209.377
65.365
1047.76
33.331
42.538
234.848
26.734
53.95
27.933
13.124
23.289
27.281
18.086
25.17
16.976
86.299
25.154
11.379
17.688
80
18.705
256.164
10.652
[truncated: 4,615 more rows]
