# Supplementary material for: Comparative Analysis of Codon Usage Patterns in Nuclear and Chloroplast Genome of Dalbergia (Fabaceae)
Source: Genes (Basel). 2023 May 19;14(5):1110. doi: 10.3390/genes14051110 (PMC10217945; doi:10.3390/genes14051110)
Supplement: Supplementary file 1 [file genes-14-01110-s001.zip › Supplementary Excel S10.xlsx]

## Sheet: Phe
Gene	UUU	UUC	RPKM
evm.model.scaffold_30.17	1.67	0.33	32.211
evm.model.scaffold_30.74	1.6	0.4	35.828
evm.model.scaffold_30.18	1.4	0.6	13.106
evm.model.scaffold_30.35	0.5	1.5	19.755
evm.model.scaffold_30.6	0.91	1.09	10.274
evm.model.scaffold_30.99.1	1.08	0.92	37.53
evm.model.scaffold_30.15	1.6	0.4	28.135
evm.model.scaffold_30.57	1	1	23.597
evm.model.scaffold_30.58	1.12	0.88	16.215
evm.model.scaffold_30.13	1	1	27.243
evm.model.scaffold_30.16	1.2	0.8	34.685
evm.model.scaffold_30.50	1.59	0.41	29.624
evm.model.scaffold_185.490	0.67	1.33	37.337
evm.model.scaffold_185.428	0.77	1.23	10.141
evm.model.scaffold_185.496	1.03	0.97	19.285
evm.model.scaffold_185.534	1.17	0.83	35.458
evm.model.scaffold_185.340.1	1.2	0.8	75.121
evm.model.scaffold_185.28	0.25	1.75	48.94
evm.model.scaffold_185.262	1.08	0.92	17.025
evm.model.scaffold_185.32	0.67	1.33	62.511
evm.model.scaffold_185.29	1	1	27.928
evm.model.scaffold_185.117	1	1	31.362
evm.model.scaffold_185.325	1.05	0.95	133.24
evm.model.scaffold_185.376	1.38	0.63	16.171
evm.model.scaffold_185.518	0.76	1.24	14.597
evm.model.scaffold_185.307	1	1	11.589
evm.model.scaffold_185.82	1.47	0.53	50.616
evm.model.scaffold_185.129	0.71	1.29	36.267
evm.model.scaffold_185.34	1.5	0.5	44.369
evm.model.scaffold_185.115	0.57	1.43	11.34
evm.model.scaffold_185.514	1.12	0.88	495.985
evm.model.scaffold_185.255	0.91	1.09	38.959
evm.model.scaffold_185.384	1	1	10.698
evm.model.scaffold_185.301	1.33	0.67	32.282
evm.model.scaffold_185.541	1.5	0.5	128.345
evm.model.scaffold_185.48	0.86	1.14	60.84
evm.model.scaffold_185.163	1.2	0.8	10.747
evm.model.scaffold_185.35	0.67	1.33	431.273
evm.model.scaffold_185.310	1.45	0.55	57.041
evm.model.scaffold_185.323	1.33	0.67	22.159
evm.model.scaffold_185.293	1.13	0.88	65.669
evm.model.scaffold_185.482	2	0	65.384
evm.model.scaffold_185.368	1	1	10.916
evm.model.scaffold_185.407	1.11	0.89	36.364
evm.model.scaffold_185.110	0.67	1.33	27.522
evm.model.scaffold_185.104	1.57	0.43	44.342
evm.model.scaffold_185.59	1.55	0.45	21.152
evm.model.scaffold_185.391	1.71	0.29	57.311
evm.model.scaffold_185.87	1.33	0.67	93.378
evm.model.scaffold_185.268	1.36	0.64	93.918
evm.model.scaffold_185.241	0.77	1.23	81.741
evm.model.scaffold_185.337_evm.model.scaffold_185.338	1.27	0.73	78.859
evm.model.scaffold_185.158	0.29	1.71	13.521
evm.model.scaffold_185.156	1.38	0.63	50.563
evm.model.scaffold_185.244	1.23	0.77	18.651
evm.model.scaffold_185.308	1	1	16.492
evm.model.scaffold_185.73	1.07	0.93	10.218
evm.model.scaffold_185.275	0.93	1.07	68.167
evm.model.scaffold_185.330	1.55	0.45	52.762
evm.model.scaffold_185.250	0.9	1.1	38.324
evm.model.scaffold_185.61	0.7	1.3	19.412
evm.model.scaffold_185.317	0.92	1.08	24.873
evm.model.scaffold_185.51	1.33	0.67	19.698
evm.model.scaffold_185.401	1.33	0.67	82.244
evm.model.scaffold_185.114	0.71	1.29	35.486
evm.model.scaffold_185.131	1.33	0.67	34.4
evm.model.scaffold_185.26	1.29	0.71	17.161
evm.model.scaffold_185.456	1.3	0.7	30.902
evm.model.scaffold_185.458	1.09	0.91	117.16
evm.model.scaffold_185.238	0.78	1.22	17.724
evm.model.scaffold_185.15	0.29	1.71	110.75
evm.model.scaffold_185.89	1.33	0.67	41.466
evm.model.scaffold_185.159	1.45	0.55	28.399
evm.model.scaffold_185.361	0.93	1.07	20.468
evm.model.scaffold_185.313	1.2	0.8	26.906
evm.model.scaffold_185.491	1.14	0.86	30.355
evm.model.scaffold_185.277	1.23	0.77	13.972
evm.model.scaffold_185.504	0.76	1.24	59.692
evm.model.scaffold_185.96	0	2	15.33
evm.model.scaffold_185.388	1.33	0.67	16.82
evm.model.scaffold_185.78	1.09	0.91	23.8
evm.model.scaffold_185.322	0.8	1.2	14.275
evm.model.scaffold_185.157	0.57	1.43	21.946
evm.model.scaffold_185.79	0.33	1.67	19.693
evm.model.scaffold_185.94	0.56	1.44	12.13
evm.model.scaffold_185.121	0.4	1.6	12.528
evm.model.scaffold_185.134	1.5	0.5	42.261
evm.model.scaffold_185.66_evm.model.scaffold_185.67	1.46	0.54	30.448
evm.model.scaffold_185.374	1.33	0.67	16.648
evm.model.scaffold_185.77	1.75	0.25	16.909
evm.model.scaffold_185.372	0.44	1.56	29.733
evm.model.scaffold_185.102	1.5	0.5	52.456
evm.model.scaffold_185.50	0.92	1.08	114.399
evm.model.scaffold_185.154	1.3	0.7	15.296
evm.model.scaffold_185.133	1.16	0.84	362.883
evm.model.scaffold_185.197	1.04	0.96	14.208
evm.model.scaffold_185.109	1.09	0.91	46.076
evm.model.scaffold_185.72	1.33	0.67	21.725
evm.model.scaffold_185.379	1.16	0.84	53.558
evm.model.scaffold_185.360	0.6	1.4	40.964
evm.model.scaffold_185.57	0.63	1.37	10.458
evm.model.scaffold_185.230	1	1	17.862
evm.model.scaffold_185.167	1.3	0.7	41.775
evm.model.scaffold_185.44	1.31	0.69	28.945
evm.model.scaffold_185.472	0.86	1.14	130.61
evm.model.scaffold_185.137	2	0	27.247
evm.model.scaffold_185.383	1	1	12.881
evm.model.scaffold_185.461	0.4	1.6	15.547
evm.model.scaffold_185.291	1	1	98.265
evm.model.scaffold_185.261	1.36	0.64	76.685
evm.model.scaffold_185.75	1	1	38.169
evm.model.scaffold_185.506	1.25	0.75	10.626
evm.model.scaffold_185.248	0.33	1.67	123.572
evm.model.scaffold_185.433	1.13	0.88	12.345
evm.model.scaffold_185.118	1.4	0.6	41.36
evm.model.scaffold_185.112	1.43	0.57	21.386
evm.model.scaffold_185.60	0.44	1.56	30.637
evm.model.scaffold_185.520	1.45	0.55	17.605
evm.model.scaffold_185.263	1.5	0.5	14.407
evm.model.scaffold_185.231	0.4	1.6	32.412
evm.model.scaffold_185.292	0.86	1.14	30.229
evm.model.scaffold_185.334	0.86	1.14	17.328
evm.model.scaffold_185.127	0.3	1.7	21.01
evm.model.scaffold_185.199	0.72	1.28	16.383
evm.model.scaffold_185.53	1.45	0.55	49.308
evm.model.scaffold_185.276	1.13	0.87	21.515
evm.model.scaffold_185.408	1.3	0.7	109.001
evm.model.scaffold_185.41	1.16	0.84	10.716
evm.model.scaffold_185.395	1.09	0.91	39.591
evm.model.scaffold_185.287	1	1	10.094
evm.model.scaffold_185.356	1.13	0.87	10.626
evm.model.scaffold_185.253	2	0	40.422
evm.model.scaffold_185.470	0.5	1.5	65.437
evm.model.scaffold_185.435	0.96	1.04	76.754
evm.model.scaffold_185.380	0.17	1.83	262.018
evm.model.scaffold_185.168	0.5	1.5	40.086
evm.model.scaffold_185.321	0.9	1.1	214.92
evm.model.scaffold_185.52	0	2	70.747
evm.model.scaffold_185.161	1.15	0.85	33.886
evm.model.scaffold_185.309	1.05	0.95	35.62
evm.model.scaffold_185.389	1.82	0.18	10.81
evm.model.scaffold_185.519	0.89	1.11	60.458
evm.model.scaffold_185.455	1.09	0.91	82.304
evm.model.scaffold_185.311	1.6	0.4	116.561
evm.model.scaffold_185.91	1.29	0.71	59.749
evm.model.scaffold_185.402	1.5	0.5	10.325
evm.model.scaffold_185.49	1.05	0.95	50.404
evm.model.scaffold_185.62	0.87	1.13	20.32
evm.model.scaffold_185.359	0.44	1.56	29.785
evm.model.scaffold_185.316	0.69	1.31	62.151
evm.model.scaffold_185.545	1.14	0.86	27.137
evm.model.scaffold_185.175	1	1	14.295
evm.model.scaffold_185.103	1.39	0.61	34.875
evm.model.scaffold_185.362.1	0.8	1.2	38.966
evm.model.scaffold_185.303	0.92	1.08	47.006
evm.model.scaffold_185.457	2	0	48.843
evm.model.scaffold_185.355	1	1	13.248
evm.model.scaffold_185.370	0	2	302.801
evm.model.scaffold_185.56	0.88	1.12	58.435
evm.model.scaffold_185.278	1.1	0.9	90.085
evm.model.scaffold_35.30	1	1	10.47
evm.model.scaffold_35.873	0.78	1.22	20.48
evm.model.scaffold_35.1151	1.25	0.75	23.605
evm.model.scaffold_35.449	1.1	0.9	13.498
evm.model.scaffold_35.1079	1.26	0.74	14.244
evm.model.scaffold_35.1185	1.08	0.92	12.407
evm.model.scaffold_35.369	1.28	0.72	12.687
evm.model.scaffold_35.957	0	2	10.653
evm.model.scaffold_35.177	0.4	1.6	16.177
evm.model.scaffold_35.834	0.5	1.5	54.159
evm.model.scaffold_35.1136	0.82	1.18	10.718
evm.model.scaffold_35.958	0.86	1.14	26.727
evm.model.scaffold_35.113	1.27	0.73	11.626
evm.model.scaffold_35.383	1.05	0.95	10.285
evm.model.scaffold_35.1090	0	0	15.366
evm.model.scaffold_35.659	0.89	1.11	29.991
evm.model.scaffold_35.522	1.33	0.67	57.863
evm.model.scaffold_35.477	1.15	0.85	13.252
evm.model.scaffold_35.404	0.29	1.71	65.319
evm.model.scaffold_35.933	0.88	1.12	57.932
evm.model.scaffold_35.168	1.47	0.53	29.41
evm.model.scaffold_35.227	0.8	1.2	59.361
evm.model.scaffold_35.507	1.67	0.33	12.967
evm.model.scaffold_35.907	0.94	1.06	21.188
evm.model.scaffold_35.338	1.75	0.25	13.344
evm.model.scaffold_35.105	1.67	0.33	30.426
evm.model.scaffold_35.1046	0.6	1.4	26.158
evm.model.scaffold_35.542	1	1	11.244
evm.model.scaffold_35.1001	1.1	0.9	10.697
evm.model.scaffold_35.974	0.75	1.25	95.771
evm.model.scaffold_35.197	0.98	1.02	222.244
evm.model.scaffold_35.239	1.39	0.61	21.896
evm.model.scaffold_35.172	1	1	19.062
evm.model.scaffold_35.305	1.53	0.47	20.07
evm.model.scaffold_35.478	1.47	0.53	13.988
evm.model.scaffold_35.820	0.35	1.65	39.067
evm.model.scaffold_35.1014	0.6	1.4	10.294
evm.model.scaffold_35.188	0.22	1.78	65.118
evm.model.scaffold_35.586	0.57	1.43	137.131
evm.model.scaffold_35.747	1.03	0.97	15.079
evm.model.scaffold_35.510	1.56	0.44	28.678
evm.model.scaffold_35.100	0.91	1.09	26.402
evm.model.scaffold_35.578	1.33	0.67	29.507
evm.model.scaffold_35.234	1.39	0.61	16.626
evm.model.scaffold_35.559	1.5	0.5	10.713
evm.model.scaffold_35.641	1	1	10.418
evm.model.scaffold_35.1028	0.67	1.33	45.839
evm.model.scaffold_35.670	0.32	1.68	106.343
evm.model.scaffold_35.420	0.97	1.03	10.908
evm.model.scaffold_35.902	0.86	1.14	18.403
evm.model.scaffold_35.407	2	0	34.471
evm.model.scaffold_35.620	1.67	0.33	20.129
evm.model.scaffold_35.1058	0.77	1.23	10.519
evm.model.scaffold_35.679	1.2	0.8	33.799
evm.model.scaffold_35.626	1.16	0.84	36.812
evm.model.scaffold_35.694.1	2	0	449.439
evm.model.scaffold_35.784_evm.model.scaffold_35.785	1.74	0.26	54.746
evm.model.scaffold_35.286	0.97	1.03	26.552
evm.model.scaffold_35.421	1.25	0.75	28.23
evm.model.scaffold_35.236	0	2	22.975
evm.model.scaffold_35.757	1.67	0.33	39.103
evm.model.scaffold_35.752	1.39	0.61	15.556
evm.model.scaffold_35.663	1.82	0.18	21.519
evm.model.scaffold_35.397	0.8	1.2	41.25
evm.model.scaffold_35.564	1	1	60.403
evm.model.scaffold_35.245	1.17	0.83	19.281
evm.model.scaffold_35.1022.2	1.44	0.56	11.43
evm.model.scaffold_35.618	1.05	0.95	27.205
evm.model.scaffold_35.575	0.89	1.11	103.766
evm.model.scaffold_35.909.2	1.29	0.71	37.948
evm.model.scaffold_35.743	1.23	0.77	20.37
evm.model.scaffold_35.1019	1.2	0.8	10.482
evm.model.scaffold_35.321	1.29	0.71	11.144
evm.model.scaffold_35.881	0.67	1.33	15.795
evm.model.scaffold_35.269	1.1	0.9	30.54
evm.model.scaffold_35.592	1.37	0.63	13.789
evm.model.scaffold_35.499	1	1	130.235
evm.model.scaffold_35.711	1.25	0.75	28.235
evm.model.scaffold_35.1072	1.13	0.88	26.84
evm.model.scaffold_35.466	1.63	0.38	10.31
evm.model.scaffold_35.498	1.71	0.29	12.19
evm.model.scaffold_35.668	0	2	19.024
evm.model.scaffold_35.729	1	1	12.627
evm.model.scaffold_35.894	0.67	1.33	39.09
evm.model.scaffold_35.751	1.26	0.74	13.856
evm.model.scaffold_35.792	1.2	0.8	11.286
evm.model.scaffold_35.520	1	1	23.663
evm.model.scaffold_35.328	1	1	32.118
evm.model.scaffold_35.758	1.4	0.6	15.173
evm.model.scaffold_35.536	1.25	0.75	20.052
evm.model.scaffold_35.547	0.42	1.58	29.957
evm.model.scaffold_35.823	1.33	0.67	27.735
evm.model.scaffold_35.744	1	1	28.784
evm.model.scaffold_35.252	0.75	1.25	21.398
evm.model.scaffold_35.419	0.8	1.2	58.566
evm.model.scaffold_35.231	0.8	1.2	11.08
evm.model.scaffold_35.633	1.33	0.67	198.451
evm.model.scaffold_35.765	0.91	1.09	55.159
evm.model.scaffold_35.39	1.36	0.64	12.673
evm.model.scaffold_35.150	0.92	1.08	52.101
evm.model.scaffold_35.88	1.1	0.9	11.861
evm.model.scaffold_35.311	1.06	0.94	26.493
evm.model.scaffold_35.372	1.45	0.55	22.755
evm.model.scaffold_35.67	1	1	43.82
evm.model.scaffold_35.87	1.33	0.67	21.89
evm.model.scaffold_35.129	0.64	1.36	19.585
evm.model.scaffold_35.952	1.11	0.89	10.244
evm.model.scaffold_35.335.1	1.79	0.21	14.852
evm.model.scaffold_35.355	2	0	15.388
evm.model.scaffold_35.198	2	0	96.011
evm.model.scaffold_35.764	0.91	1.09	27.787
evm.model.scaffold_35.99	1.39	0.61	39.585
evm.model.scaffold_35.135	1.2	0.8	24.661
evm.model.scaffold_35.793	1.11	0.89	78.262
evm.model.scaffold_35.84	1.03	0.97	19.373
evm.model.scaffold_35.833	1.38	0.62	24.444
evm.model.scaffold_35.488	2	0	26.589
evm.model.scaffold_35.414	1.27	0.73	25.675
evm.model.scaffold_35.629	1.21	0.79	128.702
evm.model.scaffold_35.461	1.17	0.83	49.049
evm.model.scaffold_35.1102	0.91	1.09	11.514
evm.model.scaffold_35.85	1	1	19.896
evm.model.scaffold_35.1070	1.33	0.67	13.42
evm.model.scaffold_35.924	1	1	32.201
evm.model.scaffold_35.755	0.5	1.5	20.317
evm.model.scaffold_35.408	0.73	1.27	98.672
evm.model.scaffold_35.181	0	2	151.572
evm.model.scaffold_35.1150	1.57	0.43	15.551
evm.model.scaffold_35.3	1.23	0.77	110.394
evm.model.scaffold_35.1171	2	0	13.717
evm.model.scaffold_35.971	0.62	1.38	37.35
evm.model.scaffold_35.737	2	0	101.386
evm.model.scaffold_35.115	1.08	0.92	17.022
evm.model.scaffold_35.8	1	1	17.901
evm.model.scaffold_35.24	0.94	1.06	29.406
evm.model.scaffold_35.801	0.65	1.35	35.834
evm.model.scaffold_35.961	1.07	0.93	42.578
evm.model.scaffold_35.762	0.9	1.1	50.784
evm.model.scaffold_35.230	1.09	0.91	20.365
evm.model.scaffold_35.1045	0.29	1.71	13.349
evm.model.scaffold_35.453	1.14	0.86	39.532
evm.model.scaffold_35.409	0.6	1.4	21.856
evm.model.scaffold_35.2	1.42	0.58	23.1
evm.model.scaffold_35.825	1.47	0.53	35.289
evm.model.scaffold_35.395	0	2	139.597
evm.model.scaffold_35.925	1.47	0.53	11.128
evm.model.scaffold_35.81	1.42	0.58	11.914
evm.model.scaffold_35.794	1.09	0.91	20.273
evm.model.scaffold_35.572	0.67	1.33	28.689
evm.model.scaffold_35.317	1.57	0.43	26.793
evm.model.scaffold_35.666	0.33	1.67	32.23
evm.model.scaffold_35.722	0.67	1.33	11.051
evm.model.scaffold_35.258	1.28	0.72	11.751
evm.model.scaffold_35.804	1.33	0.67	10.971
evm.model.scaffold_35.459	1	1	940.174
evm.model.scaffold_35.350	0.97	1.03	13.767
evm.model.scaffold_35.194	2	0	144.226
evm.model.scaffold_35.750	1	1	69.903
evm.model.scaffold_35.233	0.89	1.11	17.424
evm.model.scaffold_35.687	1	1	13.163
evm.model.scaffold_35.742	1.36	0.64	16.04
evm.model.scaffold_35.257	2	0	25.399
evm.model.scaffold_35.90	0.67	1.33	11.141
evm.model.scaffold_35.1055	1.33	0.67	11.093
evm.model.scaffold_35.271	1.33	0.67	34.085
evm.model.scaffold_35.332	1.09	0.91	21.79
evm.model.scaffold_35.728	1	1	47.646
evm.model.scaffold_35.625	1.25	0.75	32.752
evm.model.scaffold_35.1000	0.57	1.43	30.145
evm.model.scaffold_35.658	1.67	0.33	48.141
evm.model.scaffold_35.184	1.17	0.83	13.676
evm.model.scaffold_35.735	0.67	1.33	13.78
evm.model.scaffold_35.726	1.27	0.73	19.984
evm.model.scaffold_35.1083	0.44	1.56	33.221
evm.model.scaffold_35.106	1.67	0.33	23.633
evm.model.scaffold_35.56.2	0.96	1.04	74.286
evm.model.scaffold_35.1117	1.71	0.29	16.437
evm.model.scaffold_35.1039	1.13	0.87	12.692
evm.model.scaffold_35.48	1.44	0.56	14.012
evm.model.scaffold_35.441	1.67	0.33	11.449
evm.model.scaffold_35.169	0.72	1.28	13.794
evm.model.scaffold_35.526	1	1	19.637
evm.model.scaffold_35.1115	1.58	0.42	13.988
evm.model.scaffold_35.201	0.88	1.12	26.046
evm.model.scaffold_35.824	1.24	0.76	25.178
evm.model.scaffold_35.406	0.89	1.11	992.1
evm.model.scaffold_35.33	0.93	1.07	20.203
evm.model.scaffold_35.218_evm.model.scaffold_35.219	1.6	0.4	30.04
evm.model.scaffold_35.644	0.91	1.09	11.609
evm.model.scaffold_35.216	0.44	1.56	81.044
evm.model.scaffold_35.316	0.64	1.36	312.519
evm.model.scaffold_35.485	1	1	14.325
evm.model.scaffold_35.570.1	1.27	0.73	10.318
evm.model.scaffold_35.591	1.6	0.4	17.699
evm.model.scaffold_35.970	1.6	0.4	18.45
evm.model.scaffold_35.681	1.48	0.52	30.303
evm.model.scaffold_35.487	2	0	20.584
evm.model.scaffold_35.127	1.26	0.74	65.356
evm.model.scaffold_35.1003	0.67	1.33	14.642
evm.model.scaffold_35.504	0.73	1.27	11.131
evm.model.scaffold_35.790	0.8	1.2	353.399
evm.model.scaffold_35.325	1.18	0.82	36.79
evm.model.scaffold_35.589	1.42	0.58	10.42
evm.model.scaffold_35.327	1.14	0.86	42.288
evm.model.scaffold_35.1125	0.33	1.67	48.103
evm.model.scaffold_35.182	1.27	0.73	13.078
evm.model.scaffold_35.467	0.54	1.46	28.382
evm.model.scaffold_35.678	0.89	1.11	15.745
evm.model.scaffold_35.807	0.89	1.11	24.336
evm.model.scaffold_35.693	1.18	0.82	14.772
evm.model.scaffold_35.294	1.29	0.71	30.396
evm.model.scaffold_35.275	1.33	0.67	13.121
evm.model.scaffold_35.345	1.43	0.57	25.317
evm.model.scaffold_35.738	1.3	0.7	20.535
evm.model.scaffold_35.1004	0.67	1.33	42.085
evm.model.scaffold_35.313	1.17	0.83	22.351
evm.model.scaffold_35.1170	0.8	1.2	3789.21
evm.model.scaffold_35.333.1	1.19	0.81	12.394
evm.model.scaffold_35.208	0.77	1.23	20.546
evm.model.scaffold_35.199	1.6	0.4	15.019
evm.model.scaffold_35.246	1.25	0.75	10.598
evm.model.scaffold_35.1159	0.95	1.05	61.18
evm.model.scaffold_35.207	0.57	1.43	15.054
evm.model.scaffold_35.405	1.06	0.94	24.1
evm.model.scaffold_35.125	0.4	1.6	70.93
evm.model.scaffold_35.791	1.33	0.67	700.848
evm.model.scaffold_35.228	1.26	0.74	112.026
evm.model.scaffold_35.425	0.57	1.43	48.049
evm.model.scaffold_35.91	0.57	1.43	50.486
evm.model.scaffold_35.174	1	1	80.143
evm.model.scaffold_35.519	1.71	0.29	15.507
evm.model.scaffold_35.746	1.06	0.94	10.353
evm.model.scaffold_35.563	1.33	0.67	19.394
evm.model.scaffold_35.356	1.53	0.47	14.122
evm.model.scaffold_35.966	1.08	0.92	10.274
evm.model.scaffold_35.75.1	0.29	1.71	426.244
evm.model.scaffold_35.426	0.88	1.13	29.212
evm.model.scaffold_35.238	1.41	0.59	40.175
evm.model.scaffold_35.200	1	1	32.317
evm.model.scaffold_35.173	1.33	0.67	21.492
evm.model.scaffold_35.810	1.14	0.86	11.94
evm.model.scaffold_35.14	0.36	1.64	15.391
evm.model.scaffold_35.685_evm.model.scaffold_35.686	1	1	38.301
evm.model.scaffold_35.866	0.82	1.18	49.295
evm.model.scaffold_35.178	1.2	0.8	15.206
evm.model.scaffold_35.223	1.47	0.53	17.391
evm.model.scaffold_35.1017	0.7	1.3	15.147
evm.model.scaffold_35.375	1.2	0.8	15.822
evm.model.scaffold_35.7	1.55	0.45	14.251
evm.model.scaffold_35.1140	1.33	0.67	24.006
evm.model.scaffold_35.1080	0.77	1.23	20.52
evm.model.scaffold_35.1086	1.11	0.89	20.631
evm.model.scaffold_35.77	0.95	1.05	13.866
evm.model.scaffold_35.220	1.43	0.57	31.783
evm.model.scaffold_35.1002	1.43	0.57	14.561
evm.model.scaffold_35.1099	1.14	0.86	17.096
evm.model.scaffold_99.54	1.14	0.86	73.997
evm.model.scaffold_99.58	1.3	0.7	10.568
evm.model.scaffold_99.21	1.2	0.8	16.161
evm.model.scaffold_99.65	1.27	0.73	25.399
evm.model.scaffold_99.9	0.67	1.33	621.767
evm.model.scaffold_99.8	1.21	0.79	19.578
evm.model.scaffold_99.57	0	2	97.068
evm.model.scaffold_99.79	0.64	1.36	20.934
evm.model.scaffold_99.37	0.36	1.64	44.432
evm.model.scaffold_99.55	0.86	1.14	35.357
evm.model.scaffold_99.51	0.7	1.3	349.362
evm.model.scaffold_99.28	1.08	0.92	42.183
evm.model.scaffold_99.56	1.47	0.53	60.022
evm.model.scaffold_99.75	0.92	1.08	26.374
evm.model.scaffold_99.31	1	1	83.172
evm.model.scaffold_99.36	0.64	1.36	32.282
evm.model.scaffold_99.29	1.5	0.5	23.945
evm.model.scaffold_99.78	0.8	1.2	41.444
evm.model.scaffold_99.30	1.33	0.67	57.475
evm.model.scaffold_99.10	1	1	19.497
evm.model.scaffold_99.73	0.67	1.33	27.479
evm.model.scaffold_99.67	0.91	1.09	773.174
evm.model.scaffold_99.60	0.46	1.54	10.398
evm.model.scaffold_99.34	0.4	1.6	18.124
evm.model.scaffold_99.22	1.83	0.17	10.955
evm.model.scaffold_311.9	1	1	19.312
evm.model.scaffold_311.4	1.6	0.4	13.153
evm.model.scaffold_311.5	1.23	0.77	12.807
evm.model.scaffold_334.7	1	1	60.994
evm.model.scaffold_375.676	0.82	1.18	10.085
evm.model.scaffold_375.111	0.11	1.89	325.665
evm.model.scaffold_375.101_evm.model.scaffold_375.102	1.26	0.74	18.39
evm.model.scaffold_375.107	1.33	0.67	36.181
evm.model.scaffold_375.759	1.56	0.44	22.418
evm.model.scaffold_375.113	0.33	1.67	22.937
evm.model.scaffold_375.171	1.5	0.5	40.026
evm.model.scaffold_375.122	1.69	0.31	32.527
evm.model.scaffold_375.779	1.17	0.83	10.642
evm.model.scaffold_375.360	0.76	1.24	20.668
evm.model.scaffold_375.679	1.47	0.53	12.236
evm.model.scaffold_375.32	1.22	0.78	14.443
evm.model.scaffold_375.731	1.56	0.44	16.074
evm.model.scaffold_375.64.2	1.33	0.67	35.114
evm.model.scaffold_375.575	1.33	0.67	25.937
evm.model.scaffold_375.417	0.71	1.29	31.738
evm.model.scaffold_375.774	1.33	0.67	16.063
evm.model.scaffold_375.536	0	2	54.5
evm.model.scaffold_375.364	0.4	1.6	22.707
evm.model.scaffold_375.714	1	1	591.418
evm.model.scaffold_375.40	0	0	29.023
evm.model.scaffold_375.229	1.33	0.67	15.239
evm.model.scaffold_375.314	1.11	0.89	10.1
evm.model.scaffold_375.290	0.57	1.43	16.758
evm.model.scaffold_375.215	0.2	1.8	17.304
evm.model.scaffold_375.527.1	1.6	0.4	20.651
evm.model.scaffold_375.233	1.38	0.63	28.337
evm.model.scaffold_375.168	1.18	0.82	26.953
evm.model.scaffold_375.207	0.27	1.73	42.513
evm.model.scaffold_375.155	1.2	0.8	12.115
evm.model.scaffold_375.240	1.5	0.5	30.684
evm.model.scaffold_375.603	1	1	41.854
evm.model.scaffold_375.65	1.25	0.75	12.927
evm.model.scaffold_375.499	1	1	94.088
evm.model.scaffold_375.217	0.7	1.3	30.632
evm.model.scaffold_375.656	0.97	1.03	143.972
evm.model.scaffold_375.124	0	2	76.636
evm.model.scaffold_375.202	1.5	0.5	15.195
evm.model.scaffold_375.237	1.43	0.57	50.734
evm.model.scaffold_375.46	1.43	0.57	53.708
evm.model.scaffold_375.58	1.41	0.59	22.294
evm.model.scaffold_375.114	1	1	59.904
evm.model.scaffold_375.681	1.14	0.86	10.647
evm.model.scaffold_375.56	1.24	0.76	52.64
evm.model.scaffold_375.444	1.07	0.93	29.344
evm.model.scaffold_375.607.3	1.04	0.96	87.285
evm.model.scaffold_375.562	0.31	1.69	35.469
evm.model.scaffold_375.205	1.31	0.69	17.949
evm.model.scaffold_375.528	1.33	0.67	10.177
evm.model.scaffold_375.739	1.6	0.4	13.589
evm.model.scaffold_375.517	0.75	1.25	527.664
evm.model.scaffold_375.773	1.33	0.67	22.547
evm.model.scaffold_375.516	1.03	0.97	14.373
evm.model.scaffold_375.123	0.8	1.2	33.214
evm.model.scaffold_375.188	1.25	0.75	11.63
evm.model.scaffold_375.197	0.5	1.5	378.507
evm.model.scaffold_375.399	1	1	34.204
evm.model.scaffold_375.143.1	1.5	0.5	11.839
evm.model.scaffold_375.289	0.55	1.45	34.464
evm.model.scaffold_375.510	0.8	1.2	12.216
evm.model.scaffold_375.119	1.18	0.82	35.199
evm.model.scaffold_375.212	1.5	0.5	22.583
evm.model.scaffold_375.619	0.4	1.6	13.735
evm.model.scaffold_375.291	1	1	22.954
evm.model.scaffold_375.16	1	1	14.934
evm.model.scaffold_375.116	0.67	1.33	25.254
evm.model.scaffold_375.487	1	1	95.283
evm.model.scaffold_375.688	0.25	1.75	11.346
evm.model.scaffold_375.261.1	1.33	0.67	85.821
evm.model.scaffold_375.320	1.2	0.8	12.663
evm.model.scaffold_375.279	1.25	0.75	11.283
evm.model.scaffold_375.191	1.29	0.71	33.878
evm.model.scaffold_375.687	0.86	1.14	10.564
evm.model.scaffold_375.395	0.94	1.06	16.028
evm.model.scaffold_375.117	1.63	0.38	32.105
evm.model.scaffold_375.469	2	0	19.71
evm.model.scaffold_375.166	1	1	66.397
evm.model.scaffold_375.47.5	1.78	0.22	15.892
evm.model.scaffold_375.506	1	1	12.621
evm.model.scaffold_375.573	1.33	0.67	27.341
evm.model.scaffold_375.747	0.73	1.27	37.714
evm.model.scaffold_375.534	0.75	1.25	33.604
evm.model.scaffold_375.60	0.57	1.43	35.152
evm.model.scaffold_375.634	2	0	13.015
evm.model.scaffold_375.470	0.8	1.2	47.779
evm.model.scaffold_375.467	1.18	0.82	18.225
evm.model.scaffold_375.472	0.71	1.29	108.744
evm.model.scaffold_375.363	0.7	1.3	190.352
evm.model.scaffold_375.160	0.1	1.9	15.892
evm.model.scaffold_375.99	1.44	0.56	18.603
evm.model.scaffold_375.689	1.27	0.73	13.285
evm.model.scaffold_375.468	0.91	1.09	14.446
evm.model.scaffold_375.6	0.8	1.2	14.989
evm.model.scaffold_375.125	0.75	1.25	10.791
evm.model.scaffold_375.309	2	0	29.718
evm.model.scaffold_375.332	0.75	1.25	32.668
evm.model.scaffold_375.288	1.14	0.86	95.813
evm.model.scaffold_375.398	1.5	0.5	14.925
evm.model.scaffold_375.513	1.71	0.29	114.607
evm.model.scaffold_375.746	1.2	0.8	10.148
evm.model.scaffold_375.525	1	1	27.715
evm.model.scaffold_375.540	0.86	1.14	10.84
evm.model.scaffold_375.130	1.2	0.8	11.49
evm.model.scaffold_375.721	1.09	0.91	409.108
evm.model.scaffold_375.387.1	1.43	0.57	41.133
evm.model.scaffold_375.73	1	1	37.06
evm.model.scaffold_375.165	1.24	0.76	10.156
evm.model.scaffold_375.219	1.37	0.63	11.261
evm.model.scaffold_375.142	1.18	0.82	15.741
evm.model.scaffold_375.539	1	1	52.194
evm.model.scaffold_375.34	1.16	0.84	27.544
evm.model.scaffold_375.449	0.44	1.56	136.32
evm.model.scaffold_375.738	0.58	1.42	11.113
evm.model.scaffold_375.466	1.43	0.57	17.981
evm.model.scaffold_375.258	1.33	0.67	22.601
evm.model.scaffold_375.726	0.67	1.33	22.174
evm.model.scaffold_375.586	1.36	0.64	87.378
evm.model.scaffold_375.190	1.4	0.6	100.117
evm.model.scaffold_375.157	1.14	0.86	20.918
evm.model.scaffold_375.27	1.71	0.29	73.091
evm.model.scaffold_375.445	1.07	0.93	22.479
evm.model.scaffold_375.154	0.62	1.38	23.876
evm.model.scaffold_375.294	1.13	0.87	100.794
evm.model.scaffold_375.412_evm.model.scaffold_375.414	0.59	1.41	17.882
evm.model.scaffold_375.213	2	0	14.386
evm.model.scaffold_375.431	0.67	1.33	65.631
evm.model.scaffold_375.587	1.53	0.47	22
evm.model.scaffold_375.663	1.33	0.67	231.61
evm.model.scaffold_375.658	1.38	0.62	18.994
evm.model.scaffold_375.223	0.55	1.45	20.807
evm.model.scaffold_375.713	1.2	0.8	14.403
evm.model.scaffold_375.662	0.97	1.03	14.081
evm.model.scaffold_375.434	1.68	0.32	88.04
evm.model.scaffold_375.74.1	1.4	0.6	45.799
evm.model.scaffold_375.566	1.26	0.74	42.202
evm.model.scaffold_375.151	1	1	13.153
evm.model.scaffold_375.450	0.5	1.5	717.654
evm.model.scaffold_375.505	0.5	1.5	11.378
evm.model.scaffold_375.761	0	0	1165.56
evm.model.scaffold_375.519	1	1	88.832
evm.model.scaffold_375.426	1.58	0.42	16.636
evm.model.scaffold_375.362	1.5	0.5	204.764
evm.model.scaffold_375.730	1.33	0.67	32.387
evm.model.scaffold_375.707	1.14	0.86	36.461
evm.model.scaffold_375.531.1	0.8	1.2	288.149
evm.model.scaffold_375.322	0.84	1.16	68.447
evm.model.scaffold_375.43	0.91	1.09	111.748
evm.model.scaffold_375.264	1.11	0.89	40.149
evm.model.scaffold_375.654	0.33	1.67	10.984
evm.model.scaffold_375.305	0.5	1.5	171.107
evm.model.scaffold_375.598	0.67	1.33	10.444
evm.model.scaffold_375.593	1.67	0.33	25.96
evm.model.scaffold_375.62	1.53	0.47	76.753
evm.model.scaffold_375.256	0	2	11.784
evm.model.scaffold_375.203	1	1	38
evm.model.scaffold_375.685	0.86	1.14	10.034
evm.model.scaffold_375.199	0	2	288.562
evm.model.scaffold_375.700	1	1	38.446
evm.model.scaffold_375.661	1.27	0.73	32.616
evm.model.scaffold_375.36	0.57	1.43	35.996
evm.model.scaffold_375.617	0.67	1.33	46.999
evm.model.scaffold_375.743	0.5	1.5	24.865
evm.model.scaffold_375.677	1.38	0.62	23.244
evm.model.scaffold_375.596	0.75	1.25	22.134
evm.model.scaffold_375.230	0.86	1.14	43.137
evm.model.scaffold_375.353	1.22	0.78	27.612
evm.model.scaffold_375.605	1.11	0.89	114.563
evm.model.scaffold_375.418	1.6	0.4	10.107
evm.model.scaffold_375.589	0.67	1.33	395.193
evm.model.scaffold_375.682	1.28	0.72	28.694
evm.model.scaffold_375.750	1.16	0.84	63.288
evm.model.scaffold_375.635	0	0	18.744
evm.model.scaffold_375.321	1.08	0.92	21.29
evm.model.scaffold_375.271	0.93	1.07	45.442
evm.model.scaffold_375.167	1.2	0.8	35.908
evm.model.scaffold_375.421	0.87	1.13	19.789
evm.model.scaffold_375.136	1.33	0.67	18.116
evm.model.scaffold_375.235	0	2	11.88
evm.model.scaffold_375.109	0.5	1.5	26.268
evm.model.scaffold_375.140	0.75	1.25	10.387
evm.model.scaffold_375.218	1.53	0.47	36.619
evm.model.scaffold_375.163	1.08	0.92	28.784
evm.model.scaffold_375.481	1.41	0.59	13.002
evm.model.scaffold_375.352	1.67	0.33	37.638
evm.model.scaffold_375.391	0.31	1.69	37.028
evm.model.scaffold_375.601	1	1	85.327
evm.model.scaffold_375.735	1	1	41.17
evm.model.scaffold_309.24	1.33	0.67	123.077
evm.model.scaffold_309.31	0.67	1.33	11.956
evm.model.scaffold_309.22	1.56	0.44	13.918
evm.model.scaffold_205.119	1.43	0.57	22.122
evm.model.scaffold_205.210	0.5	1.5	61.867
evm.model.scaffold_205.147	1.24	0.76	33.987
evm.model.scaffold_205.78	0.31	1.69	25.238
evm.model.scaffold_205.118	1.08	0.92	36.026
evm.model.scaffold_205.149	0.2	1.8	29.51
evm.model.scaffold_205.129	0	2	152.173
evm.model.scaffold_205.79	1.6	0.4	12.543
evm.model.scaffold_205.153	0.55	1.45	37.129
evm.model.scaffold_205.219	0.6	1.4	79.214
evm.model.scaffold_205.166	1.54	0.46	10.96
evm.model.scaffold_205.176	1.38	0.63	20.327
evm.model.scaffold_205.167	0.48	1.52	68.996
evm.model.scaffold_205.273	0.73	1.27	16.851
evm.model.scaffold_205.220	0.91	1.09	15.156
evm.model.scaffold_205.196	2	0	11.664
evm.model.scaffold_205.141	1.45	0.55	11.866
evm.model.scaffold_205.227	1.2	0.8	28.934
evm.model.scaffold_205.145	1.08	0.92	15.472
evm.model.scaffold_205.73.1	1.27	0.73	23.831
evm.model.scaffold_205.262	0.8	1.2	48.382
evm.model.scaffold_205.259	0.5	1.5	14.407
evm.model.scaffold_205.272	1.4	0.6	12.061
evm.model.scaffold_205.248	1.25	0.75	12.281
evm.model.scaffold_205.185	1.63	0.38	15.708
evm.model.scaffold_205.252	0.76	1.24	34.879
evm.model.scaffold_205.218	0.8	1.2	11.581
evm.model.scaffold_205.226	0.17	1.83	61.45
evm.model.scaffold_205.263	1.5	0.5	19.254
evm.model.scaffold_205.271	1.29	0.71	33.497
evm.model.scaffold_205.168	0.78	1.22	32.38
evm.model.scaffold_205.148	0.8	1.2	54.526
evm.model.scaffold_205.274	1.24	0.76	17.944
evm.model.scaffold_205.224	0.57	1.43	273.517
evm.model.scaffold_205.173	0.92	1.08	38.474
evm.model.scaffold_205.54	0.89	1.11	22.741
evm.model.scaffold_205.192	1	1	11.794
evm.model.scaffold_205.44	0.73	1.27	10.593
evm.model.scaffold_205.127	1.33	0.67	10.409
evm.model.scaffold_205.180	1.2	0.8	14.664
evm.model.scaffold_205.208	1.33	0.67	14.66
evm.model.scaffold_205.260	0.24	1.76	44.74
evm.model.scaffold_476.10	1.33	0.67	38.296
evm.model.scaffold_476.9	1.2	0.8	103.493
evm.model.scaffold_324.17	1	1	38.676
evm.model.scaffold_324.39	1.09	0.91	17.841
evm.model.scaffold_324.29	0.38	1.63	10.771
evm.model.scaffold_324.32	1.05	0.95	14.186
evm.model.scaffold_324.23	0	2	10.063
evm.model.scaffold_324.43	1.6	0.4	46.8
evm.model.scaffold_324.24	1.64	0.36	10.756
evm.model.scaffold_324.2	0.47	1.53	15.578
evm.model.scaffold_324.42	1.2	0.8	16.676
evm.model.scaffold_324.31	0.67	1.33	37.877
evm.model.scaffold_37.114.1	0	2	53.379
evm.model.scaffold_37.91.1	0.73	1.27	47.064
evm.model.scaffold_37.132	1	1	51.22
evm.model.scaffold_37.131	1	1	62.719
evm.model.scaffold_37.17	1	1	155.354
evm.model.scaffold_37.70	1.26	0.74	12.472
evm.model.scaffold_37.37	0.8	1.2	2830.09
evm.model.scaffold_37.115	0.89	1.11	11.308
evm.model.scaffold_37.52	1.56	0.44	12.628
evm.model.scaffold_37.72	1.11	0.89	23.068
evm.model.scaffold_37.61	0	2	101.395
evm.model.scaffold_37.137_evm.model.scaffold_37.138	0.78	1.22	26.812
evm.model.scaffold_37.43	0.8	1.2	275.277
evm.model.scaffold_37.141	0.71	1.29	55.321
evm.model.scaffold_37.90	1.4	0.6	35.322
evm.model.scaffold_37.71	1.22	0.78	24.707
evm.model.scaffold_37.18	0	2	39.432
evm.model.scaffold_37.144	1	1	17.296
evm.model.scaffold_37.41	1	1	1912.36
evm.model.scaffold_37.116	1.36	0.64	31.675
evm.model.scaffold_37.143	0.8	1.2	30.224
evm.model.scaffold_37.24.1	1.2	0.8	19.683
evm.model.scaffold_37.19	1.33	0.67	23.471
evm.model.scaffold_37.63	1.4	0.6	38.16
evm.model.scaffold_37.39	0.8	1.2	3520.39
evm.model.scaffold_21.69	0.67	1.33	16.751
evm.model.scaffold_21.21	1.36	0.64	53.49
evm.model.scaffold_21.19	1.7	0.3	14.806
evm.model.scaffold_21.39	0.57	1.43	63.041
evm.model.scaffold_21.46	1.11	0.89	48.906
evm.model.scaffold_21.22	1.14	0.86	10.572
evm.model.scaffold_21.32	1.33	0.67	17.285
evm.model.scaffold_21.38	1.58	0.42	29.177
evm.model.scaffold_21.53	1.13	0.87	58.708
evm.model.scaffold_21.17	1.17	0.83	10.039
evm.model.scaffold_21.54	1.17	0.83	12.417
evm.model.scaffold_21.42	1.17	0.83	40.068
evm.model.scaffold_21.58	1	1	22.509
evm.model.scaffold_21.59	2	0	247.463
evm.model.scaffold_21.60	1.67	0.33	13.741
evm.model.scaffold_21.71	1.22	0.78	41.299
evm.model.scaffold_12.101	0.5	1.5	55.485
evm.model.scaffold_12.230	1	1	96.803
evm.model.scaffold_12.75	1.64	0.36	50.502
evm.model.scaffold_12.140	1.07	0.93	315.473
evm.model.scaffold_12.278	1.41	0.59	14.371
evm.model.scaffold_12.320.1	0.88	1.13	246.933
evm.model.scaffold_12.66	1.5	0.5	11.779
evm.model.scaffold_12.271	0.74	1.26	37.354
evm.model.scaffold_12.41	1.23	0.77	32.97
evm.model.scaffold_12.170	1.13	0.88	36.638
evm.model.scaffold_12.215	2	0	66.505
evm.model.scaffold_12.127.3	1.25	0.75	38.167
evm.model.scaffold_12.272.1	1.18	0.82	28.749
evm.model.scaffold_12.146.1	1.62	0.38	20.861
evm.model.scaffold_12.201	0.58	1.42	34.015
evm.model.scaffold_12.28	1.08	0.92	34.304
evm.model.scaffold_12.240	0.89	1.11	45.1
evm.model.scaffold_12.274.3	1.11	0.89	29.21
evm.model.scaffold_12.306	1.31	0.69	16.68
evm.model.scaffold_12.71	1.62	0.38	31.796
evm.model.scaffold_12.244.1	1.29	0.71	10.993
evm.model.scaffold_12.74	0.5	1.5	152.915
evm.model.scaffold_12.86	1.24	0.76	16.651
evm.model.scaffold_12.232	1.5	0.5	558.477
evm.model.scaffold_12.226	1.36	0.64	13.348
evm.model.scaffold_12.33	0.8	1.2	50.097
evm.model.scaffold_12.248	1.23	0.77	17.03
evm.model.scaffold_12.221.2	1.55	0.45	124.78
evm.model.scaffold_12.158	1.37	0.63	16.434
evm.model.scaffold_12.204	0.27	1.73	19.183
evm.model.scaffold_12.149	0.86	1.14	14.832
evm.model.scaffold_12.253	0	2	16.498
evm.model.scaffold_12.222	1.2	0.8	61.873
evm.model.scaffold_12.288	0.88	1.12	15.467
evm.model.scaffold_12.36	1.14	0.86	58.033
evm.model.scaffold_12.276	1	1	43.924
evm.model.scaffold_12.298	0	2	55.917
evm.model.scaffold_12.80	0.75	1.25	31.601
evm.model.scaffold_12.314	1.53	0.47	51.31
evm.model.scaffold_176.314	1.33	0.67	51.952
evm.model.scaffold_176.163	1	1	39.189
evm.model.scaffold_176.196	1.43	0.57	13.336
evm.model.scaffold_176.272	1.38	0.62	14.558
evm.model.scaffold_176.291	0.89	1.11	18.94
evm.model.scaffold_176.22	1.26	0.74	22.326
evm.model.scaffold_176.260	0	2	14.834
evm.model.scaffold_176.12.1	0.84	1.16	14.735
evm.model.scaffold_176.130	1.33	0.67	18.712
evm.model.scaffold_176.323.4	0.97	1.03	89.042
evm.model.scaffold_176.315	1.14	0.86	12.645
evm.model.scaffold_176.76	1.27	0.73	10.292
evm.model.scaffold_176.295	0	2	64.266
evm.model.scaffold_176.89	1.24	0.76	134.818
evm.model.scaffold_176.335	1.42	0.58	13.904
evm.model.scaffold_176.240	0	2	84.106
evm.model.scaffold_176.133	1.33	0.67	92.595
evm.model.scaffold_176.60	1.18	0.82	17.809
evm.model.scaffold_176.170	1.43	0.57	62.774
evm.model.scaffold_176.73	1.29	0.71	154.063
evm.model.scaffold_176.276	1.25	0.75	19.628
evm.model.scaffold_176.6_evm.model.scaffold_176.7	1.3	0.7	40.336
evm.model.scaffold_176.216	0.5	1.5	134.411
evm.model.scaffold_176.327.1	0.8	1.2	10.556
evm.model.scaffold_176.296	1.07	0.93	123.244
evm.model.scaffold_176.262	0.89	1.11	24.789
evm.model.scaffold_176.242	0.89	1.11	105.652
evm.model.scaffold_176.161	1.33	0.67	55.042
evm.model.scaffold_176.138.1	1.19	0.81	14.945
evm.model.scaffold_176.54	1.47	0.53	14.296
evm.model.scaffold_176.172	1.6	0.4	10.002
evm.model.scaffold_176.35	1.58	0.42	34.293
evm.model.scaffold_176.220	1.79	0.21	50.928
evm.model.scaffold_176.80	1.38	0.62	1304.21
evm.model.scaffold_176.241	1.57	0.43	130.642
evm.model.scaffold_176.92	1.28	0.72	15.457
evm.model.scaffold_176.290	0.29	1.71	147.438
evm.model.scaffold_176.186	1.6	0.4	55.23
evm.model.scaffold_176.64.1	0.97	1.03	76.225
evm.model.scaffold_176.210	1	1	19.966
evm.model.scaffold_176.188	1.25	0.75	37.143
evm.model.scaffold_176.279	0.82	1.18	25.686
evm.model.scaffold_176.243	1.5	0.5	15.763
evm.model.scaffold_176.78	1	1	2330.76
evm.model.scaffold_176.218.1	1.63	0.38	29.516
evm.model.scaffold_176.305	0.29	1.71	45.524
evm.model.scaffold_176.199	0.86	1.14	63.044
evm.model.scaffold_176.228	0.81	1.19	15.492
evm.model.scaffold_176.151	0.71	1.29	12.793
evm.model.scaffold_176.132	1.6	0.4	15.775
evm.model.scaffold_176.277	1.6	0.4	17.413
evm.model.scaffold_176.235	1.25	0.75	130.327
evm.model.scaffold_176.267	1.33	0.67	11.168
evm.model.scaffold_176.261	1.33	0.67	17.114
evm.model.scaffold_176.316	1.36	0.64	36.437
evm.model.scaffold_176.329	0.67	1.33	16.688
evm.model.scaffold_176.165	1.33	0.67	12.097
evm.model.scaffold_176.238	0.4	1.6	98.161
evm.model.scaffold_176.332	0.67	1.33	16.524
evm.model.scaffold_176.79	1.08	0.92	3227.67
evm.model.scaffold_176.213	0.7	1.3	57.327
evm.model.scaffold_176.298	1.56	0.44	101.176
evm.model.scaffold_176.265	1.2	0.8	15.358
evm.model.scaffold_176.139	0.33	1.67	48.548
evm.model.scaffold_176.169	1.33	0.67	18.492
evm.model.scaffold_176.74	1.33	0.67	22.479
evm.model.scaffold_176.131	1.48	0.52	10.651
evm.model.scaffold_176.246	1.19	0.81	34.023
evm.model.scaffold_176.104	1.09	0.91	48.051
evm.model.scaffold_176.77	0.8	1.2	1305.81
evm.model.scaffold_176.266	0.25	1.75	77.914
evm.model.scaffold_176.330	1.33	0.67	14.233
evm.model.scaffold_176.264	1.8	0.2	40.114
evm.model.scaffold_176.200	0.4	1.6	20.215
evm.model.scaffold_176.278	1	1	74.605
evm.model.scaffold_176.103	0.5	1.5	13.933
evm.model.scaffold_176.333	1.06	0.94	20.279
evm.model.scaffold_176.83	1.5	0.5	235.166
evm.model.scaffold_176.287	1.41	0.59	71.355
evm.model.scaffold_176.212	1.05	0.95	75.794
evm.model.scaffold_176.337	1.45	0.55	30.401
evm.model.scaffold_176.156	0.92	1.08	1179.08
evm.model.scaffold_176.282	0.73	1.27	66.511
evm.model.scaffold_176.297	0.89	1.11	118.857
evm.model.scaffold_176.178	1	1	29.092
evm.model.scaffold_176.289	1.25	0.75	40.042
evm.model.scaffold_176.203	1.22	0.78	18.779
evm.model.scaffold_176.8	1.56	0.44	48.822
evm.model.scaffold_41.38	1	1	53.104
evm.model.scaffold_41.24	1.3	0.7	10.044
evm.model.scaffold_41.48	0.5	1.5	27.678
evm.model.scaffold_41.14	0	0	48.18
evm.model.scaffold_41.16	0.8	1.2	28.924
evm.model.scaffold_41.26	1.3	0.7	23.1
evm.model.scaffold_464.1	1.33	0.67	14.649
evm.model.scaffold_60.15	1	1	85.692
evm.model.scaffold_60.41	1.4	0.6	11.29
evm.model.scaffold_60.56	1	1	11.555
evm.model.scaffold_60.21	1	1	20.949
evm.model.scaffold_60.54	0.88	1.13	10.69
evm.model.scaffold_60.51.1	1.2	0.8	15.65
evm.model.scaffold_60.25	1	1	15.743
evm.model.scaffold_168.26	0.55	1.45	14.586
evm.model.scaffold_168.24	0.57	1.43	10.978
evm.model.scaffold_168.3	0.73	1.27	17.578
evm.model.scaffold_168.31	0.2	1.8	10.145
evm.model.scaffold_168.40	0.92	1.08	51.718
evm.model.scaffold_168.45	1.24	0.76	34.437
evm.model.scaffold_168.10	0.2	1.8	16.53
evm.model.scaffold_168.14	1.33	0.67	16.585
evm.model.scaffold_100.915	1.27	0.73	36.899
evm.model.scaffold_100.38	0	2	166.22
evm.model.scaffold_100.1009	0.8	1.2	13.211
evm.model.scaffold_100.1289	0.53	1.47	105.734
evm.model.scaffold_100.116	0	2	48.447
evm.model.scaffold_100.1161	1.2	0.8	158.003
evm.model.scaffold_100.1692	1.33	0.67	16.486
evm.model.scaffold_100.1335	1.14	0.86	35.007
evm.model.scaffold_100.331	0.77	1.23	107.066
evm.model.scaffold_100.1259	0.6	1.4	30.798
evm.model.scaffold_100.388	0.82	1.18	12.976
evm.model.scaffold_100.1154	0.8	1.2	173.686
evm.model.scaffold_100.1137	0.94	1.06	35.499
evm.model.scaffold_100.1263	1	1	49.099
evm.model.scaffold_100.97	1.36	0.64	26.295
evm.model.scaffold_100.742	1.48	0.52	16.172
evm.model.scaffold_100.98	0.69	1.31	31.961
evm.model.scaffold_100.660	1.33	0.67	11.999
evm.model.scaffold_100.99	1	1	19.024
evm.model.scaffold_100.697	0.86	1.14	380.173
evm.model.scaffold_100.1595	1.08	0.92	57.095
evm.model.scaffold_100.1710	1.25	0.75	18.929
evm.model.scaffold_100.1543	0.67	1.33	17.05
evm.model.scaffold_100.897	1	1	156.998
evm.model.scaffold_100.1625	1.21	0.79	114.871
evm.model.scaffold_100.397	1.08	0.92	13.6
evm.model.scaffold_100.848	1.08	0.92	44.545
evm.model.scaffold_100.142	1.33	0.67	184.416
evm.model.scaffold_100.745	1.14	0.86	15.188
evm.model.scaffold_100.785	1.6	0.4	57.413
evm.model.scaffold_100.1144	1.22	0.78	15.652
evm.model.scaffold_100.75	1.04	0.96	18.453
evm.model.scaffold_100.415	1.33	0.67	111.524
evm.model.scaffold_100.1438	1.14	0.86	16.531
evm.model.scaffold_100.205	0.86	1.14	49.914
evm.model.scaffold_100.656	1.2	0.8	34.862
evm.model.scaffold_100.1737	1.5	0.5	15.711
evm.model.scaffold_100.1400	1.45	0.55	14.339
evm.model.scaffold_100.439	0	2	39.826
evm.model.scaffold_100.643	0	2	73.395
evm.model.scaffold_100.1277	1.33	0.67	14.562
evm.model.scaffold_100.375	1.1	0.9	16.701
evm.model.scaffold_100.510	1.54	0.46	11.076
evm.model.scaffold_100.61	0.55	1.45	27.167
evm.model.scaffold_100.465	1.11	0.89	53.931
evm.model.scaffold_100.890	0.36	1.64	10.158
evm.model.scaffold_100.1251.1	1.27	0.73	22.806
evm.model.scaffold_100.971	1.11	0.89	23.239
evm.model.scaffold_100.143	1.07	0.93	140.829
evm.model.scaffold_100.1697	0.73	1.27	21.378
evm.model.scaffold_100.896	1.38	0.62	149.887
evm.model.scaffold_100.1439	0.8	1.2	46.279
evm.model.scaffold_100.1577	1	1	15.891
evm.model.scaffold_100.52	1.07	0.93	31.031
evm.model.scaffold_100.78	1.14	0.86	30.163
evm.model.scaffold_100.1262	0.8	1.2	12.032
evm.model.scaffold_100.1164	0.44	1.56	130.736
evm.model.scaffold_100.1084	1.6	0.4	27.543
evm.model.scaffold_100.1540	0	2	10.978
evm.model.scaffold_100.531	1.43	0.57	33.779
evm.model.scaffold_100.582	0.75	1.25	22.776
evm.model.scaffold_100.1513	0.5	1.5	37.991
evm.model.scaffold_100.1795	1.09	0.91	79.155
evm.model.scaffold_100.34	1.14	0.86	78.892
evm.model.scaffold_100.960	0.8	1.2	14.116
evm.model.scaffold_100.1010	1.6	0.4	10.376
evm.model.scaffold_100.1274	1.26	0.74	28.856
evm.model.scaffold_100.1906_evm.model.scaffold_100.1907	1.25	0.75	12.436
evm.model.scaffold_100.1821	0.74	1.26	41.098
evm.model.scaffold_100.36	0.43	1.57	84.423
evm.model.scaffold_100.1547.1	1.09	0.91	25.63
evm.model.scaffold_100.851.2	1.13	0.88	14.028
evm.model.scaffold_100.667	0.31	1.69	11.419
evm.model.scaffold_100.1079	0.71	1.29	17.708
evm.model.scaffold_100.1216	1.1	0.9	177.837
evm.model.scaffold_100.1581	0.73	1.27	13.516
evm.model.scaffold_100.1242	0.88	1.12	28.614
evm.model.scaffold_100.60	0.75	1.25	85.768
evm.model.scaffold_100.827	1.16	0.84	69.295
evm.model.scaffold_100.1020	1.24	0.76	14.844
evm.model.scaffold_100.858	1	1	20.775
evm.model.scaffold_100.474	1.09	0.91	26.236
evm.model.scaffold_100.507	1.19	0.81	52.569
evm.model.scaffold_100.280	1.41	0.59	12.11
evm.model.scaffold_100.900	1.69	0.31	40.909
evm.model.scaffold_100.1172	1.11	0.89	64.083
evm.model.scaffold_100.809	1.38	0.62	46.89
evm.model.scaffold_100.554	0.86	1.14	48.674
evm.model.scaffold_100.1508	1.17	0.83	136.567
evm.model.scaffold_100.690	0	2	55.159
evm.model.scaffold_100.1206	0.77	1.23	117.375
evm.model.scaffold_100.171	1.6	0.4	14.044
evm.model.scaffold_100.384	0.94	1.06	16.694
evm.model.scaffold_100.1359	1.25	0.75	14.604
evm.model.scaffold_100.389	1.2	0.8	11.002
evm.model.scaffold_100.1466	1.18	0.82	11.417
evm.model.scaffold_100.1695	1.3	0.7	55.242
evm.model.scaffold_100.941	1.43	0.57	50.986
evm.model.scaffold_100.125	1.41	0.59	64.006
evm.model.scaffold_100.15	0.93	1.07	112.974
evm.model.scaffold_100.348	1	1	57.06
evm.model.scaffold_100.173	0.67	1.33	15.926
evm.model.scaffold_100.1002	0.67	1.33	33.795
evm.model.scaffold_100.720	1.36	0.64	16.663
evm.model.scaffold_100.1333	0.89	1.11	38.199
evm.model.scaffold_100.367	0.96	1.04	30.241
evm.model.scaffold_100.420	0.8	1.2	39.581
evm.model.scaffold_100.1136	0.27	1.73	314.552
evm.model.scaffold_100.1384	0	2	630.558
evm.model.scaffold_100.292	1.65	0.35	44.301
evm.model.scaffold_100.1306	0	2	10.623
evm.model.scaffold_100.1247	0.67	1.33	12.893
evm.model.scaffold_100.300	0.83	1.17	15.769
evm.model.scaffold_100.569	0	2	22.003
evm.model.scaffold_100.702	0.83	1.17	93.265
evm.model.scaffold_100.1473	1.58	0.42	12.676
evm.model.scaffold_100.1672	0.33	1.67	128.719
evm.model.scaffold_100.1766	1	1	23.124
evm.model.scaffold_100.226	0.5	1.5	11.391
evm.model.scaffold_100.309	0.33	1.67	23.149
evm.model.scaffold_100.1098	1.67	0.33	13.041
evm.model.scaffold_100.73	0.96	1.04	18.556
evm.model.scaffold_100.714	0.6	1.4	161.585
evm.model.scaffold_100.114	0.8	1.2	40.566
evm.model.scaffold_100.10	0.53	1.47	26.979
evm.model.scaffold_100.505	0.89	1.11	68.871
evm.model.scaffold_100.838	1.07	0.93	224.636
evm.model.scaffold_100.1062	0.8	1.2	10.445
evm.model.scaffold_100.19	1	1	44.221
evm.model.scaffold_100.359	1.6	0.4	92.648
evm.model.scaffold_100.154	2	0	82.702
evm.model.scaffold_100.392	1	1	18.38
evm.model.scaffold_100.704.2	1.26	0.74	20.333
evm.model.scaffold_100.863	0.5	1.5	14.264
evm.model.scaffold_100.889	1.6	0.4	10.277
evm.model.scaffold_100.351	1.33	0.67	29.333
evm.model.scaffold_100.814	1.03	0.97	12.022
evm.model.scaffold_100.1360	1.45	0.55	56.157
evm.model.scaffold_100.1328	1.71	0.29	18.913
evm.model.scaffold_100.631	1.23	0.77	34.811
evm.model.scaffold_100.875_evm.model.scaffold_100.876	1.45	0.55	31.592
evm.model.scaffold_100.984	1.75	0.25	17.107
evm.model.scaffold_100.1904	1	1	14.126
evm.model.scaffold_100.1038	1.41	0.59	12.995
evm.model.scaffold_100.1011	0.89	1.11	12.651
evm.model.scaffold_100.442	1.18	0.82	19.73
evm.model.scaffold_100.1516	0.9	1.1	20.988
evm.model.scaffold_100.802	1.33	0.67	138.441
evm.model.scaffold_100.1514	1	1	12.563
evm.model.scaffold_100.482	0.8	1.2	134.954
evm.model.scaffold_100.856	0.67	1.33	87.057
evm.model.scaffold_100.1023	1.19	0.81	63.471
evm.model.scaffold_100.1339	1.33	0.67	70.878
evm.model.scaffold_100.1013	0.6	1.4	13.907
evm.model.scaffold_100.119	1.33	0.67	26.942
evm.model.scaffold_100.1015.1	1.2	0.8	40.136
evm.model.scaffold_100.176	0.94	1.06	14.772
evm.model.scaffold_100.1321	0.75	1.25	30.571
evm.model.scaffold_100.323	0.67	1.33	213.225
evm.model.scaffold_100.1683	1.17	0.83	22.923
evm.model.scaffold_100.881.1	1.33	0.67	22.759
evm.model.scaffold_100.1394	0.64	1.36	24.209
evm.model.scaffold_100.49	1.29	0.71	31.217
evm.model.scaffold_100.1805	0.73	1.27	23.64
evm.model.scaffold_100.1586	1	1	17.948
evm.model.scaffold_100.1752	2	0	22.179
evm.model.scaffold_100.1856	1.5	0.5	16.845
evm.model.scaffold_100.1753	0.53	1.47	16.098
evm.model.scaffold_100.1393	0.93	1.07	23.241
evm.model.scaffold_100.1313	1	1	23.788
evm.model.scaffold_100.1454	2	0	27.356
evm.model.scaffold_100.1548	1.5	0.5	73.902
evm.model.scaffold_100.51	0.4	1.6	21.89
evm.model.scaffold_100.1414	1	1	14.894
evm.model.scaffold_100.1046	0.9	1.1	109.267
evm.model.scaffold_100.1058	1.2	0.8	11.262
evm.model.scaffold_100.990	1	1	149.785
evm.model.scaffold_100.57	1	1	42.942
evm.model.scaffold_100.1191	1.14	0.86	12.568
evm.model.scaffold_100.1044	1	1	71.688
evm.model.scaffold_100.1171	1.09	0.91	35.281
evm.model.scaffold_100.187	0.27	1.73	11.898
evm.model.scaffold_100.158	0.5	1.5	27.777
evm.model.scaffold_100.1397	1.04	0.96	12.112
evm.model.scaffold_100.312	1.74	0.26	28.501
evm.model.scaffold_100.1238	0.67	1.33	12.576
evm.model.scaffold_100.1118	1	1	86.929
evm.model.scaffold_100.1776	0.52	1.48	19.023
evm.model.scaffold_100.945	0	2	16.102
evm.model.scaffold_100.1847	1.27	0.73	34.068
evm.model.scaffold_100.356	1	1	27.007
evm.model.scaffold_100.1813	1.27	0.73	22.115
evm.model.scaffold_100.218	0.43	1.57	105.973
evm.model.scaffold_100.1347	1.2	0.8	23.891
evm.model.scaffold_100.683	0.95	1.05	89.724
evm.model.scaffold_100.227	1	1	10.685
evm.model.scaffold_100.361	0.71	1.29	64.702
evm.model.scaffold_100.434	1.33	0.67	40.375
evm.model.scaffold_100.104	0.5	1.5	12.097
evm.model.scaffold_100.1485	0	2	149.674
evm.model.scaffold_100.475	1.33	0.67	310.569
evm.model.scaffold_100.535	0.83	1.17	13.994
evm.model.scaffold_100.318	1.43	0.57	19.976
evm.model.scaffold_100.1674	1.48	0.52	22.522
evm.model.scaffold_100.186	0.57	1.43	31.763
evm.model.scaffold_100.1188	1.03	0.97	22.727
evm.model.scaffold_100.1149	0.67	1.33	35.91
evm.model.scaffold_100.942.1	1.23	0.77	16.328
evm.model.scaffold_100.1227	0	0	14.417
evm.model.scaffold_100.283	0.92	1.08	602.227
evm.model.scaffold_100.1181	1.63	0.38	20.24
evm.model.scaffold_100.306	1.43	0.57	45.951
evm.model.scaffold_100.609	1.43	0.57	18.188
evm.model.scaffold_100.956	1.2	0.8	13.452
evm.model.scaffold_100.1861	2	0	16.69
evm.model.scaffold_100.166	0.89	1.11	14.348
evm.model.scaffold_100.1150.5	1.53	0.47	106.173
evm.model.scaffold_100.1452	0.89	1.11	24.758
evm.model.scaffold_100.709	0.82	1.18	12.625
evm.model.scaffold_100.778	0.36	1.64	28.429
evm.model.scaffold_100.489	1.2	0.8	39.662
evm.model.scaffold_100.248.1	0.92	1.08	24.769
evm.model.scaffold_100.800	1.57	0.43	15.671
evm.model.scaffold_100.1106	0.83	1.17	49.43
evm.model.scaffold_100.1241	0.3	1.7	128.793
evm.model.scaffold_100.986	1.3	0.7	31.42
evm.model.scaffold_100.103	0.71	1.29	14.561
evm.model.scaffold_100.644	0.2	1.8	124.648
evm.model.scaffold_100.1162	0	2	68.374
evm.model.scaffold_100.373	1.5	0.5	295.1
evm.model.scaffold_100.910	1.33	0.67	29.083
evm.model.scaffold_100.862	1.32	0.68	25.227
evm.model.scaffold_100.830	0.75	1.25	16.622
evm.model.scaffold_100.1103	0.71	1.29	31.798
evm.model.scaffold_100.381	0.25	1.75	28.512
evm.model.scaffold_100.1903	0.86	1.14	10.889
evm.model.scaffold_100.537.1	1.47	0.53	534.717
evm.model.scaffold_100.591	0.57	1.43	13.319
evm.model.scaffold_100.374	1.83	0.17	25.839
evm.model.scaffold_100.253	0.71	1.29	35.681
evm.model.scaffold_100.1184	1.33	0.67	12.632
evm.model.scaffold_100.952	0.93	1.07	84.336
evm.model.scaffold_100.1349	1.14	0.86	53.865
evm.model.scaffold_100.452	0.86	1.14	24.531
evm.model.scaffold_100.1377	1.3	0.7	25.166
evm.model.scaffold_100.773.1	1.29	0.71	103.401
evm.model.scaffold_100.1087	1.02	0.98	260.474
evm.model.scaffold_100.653.1	0.93	1.07	46.989
evm.model.scaffold_100.687.2	1.44	0.56	27.993
evm.model.scaffold_100.1027	1.64	0.36	35.172
evm.model.scaffold_100.185	1.2	0.8	11.096
evm.model.scaffold_100.1408	0.36	1.64	15.941
evm.model.scaffold_100.981	1.5	0.5	11.899
evm.model.scaffold_100.1318.1	1.33	0.67	18.232
evm.model.scaffold_100.460	0.63	1.38	10.041
evm.model.scaffold_100.350	1.47	0.53	19.219
evm.model.scaffold_100.1854	1.45	0.55	28.655
evm.model.scaffold_100.481	0.81	1.19	19.321
evm.model.scaffold_100.1503	1	1	72.09
evm.model.scaffold_100.1720	1.26	0.74	10.815
evm.model.scaffold_100.353	0.75	1.25	35.083
evm.model.scaffold_100.1148	1.23	0.77	15.005
evm.model.scaffold_100.17	1.2	0.8	115.878
evm.model.scaffold_100.1116	0.86	1.14	26.241
evm.model.scaffold_100.651	0.67	1.33	27.403
evm.model.scaffold_100.1030	0.42	1.58	10.399
evm.model.scaffold_100.299	0.44	1.56	62.596
evm.model.scaffold_100.1240	0.67	1.33	77.406
evm.model.scaffold_100.650	0.9	1.1	10.231
evm.model.scaffold_100.487	1	1	18.71
evm.model.scaffold_100.1111	1	1	240.232
evm.model.scaffold_100.1440	1.33	0.67	37.882
evm.model.scaffold_100.891	2	0	361.589
evm.model.scaffold_100.540	1.33	0.67	94.978
evm.model.scaffold_100.932.2	1.2	0.8	40.624
evm.model.scaffold_100.884	1	1	106.548
evm.model.scaffold_100.1537	1.2	0.8	49.033
evm.model.scaffold_100.905	1.29	0.71	16.543
evm.model.scaffold_100.1597	0.38	1.63	15.001
evm.model.scaffold_100.1905	1.31	0.69	10.274
evm.model.scaffold_100.921	1	1	53.864
evm.model.scaffold_100.456	1.33	0.67	14.853
evm.model.scaffold_100.330	0.57	1.43	215.905
evm.model.scaffold_100.934	1.14	0.86	18.158
evm.model.scaffold_100.1787	0.4	1.6	26.715
evm.model.scaffold_100.357	0	2	103.29
evm.model.scaffold_100.1288	0	2	38.706
evm.model.scaffold_100.206	1	1	57.006
evm.model.scaffold_100.563	0.67	1.33	270.379
evm.model.scaffold_100.846	1.16	0.84	14.912
evm.model.scaffold_100.1573	1.36	0.64	56.494
evm.model.scaffold_100.695	1.33	0.67	50.304
evm.model.scaffold_100.287	1.5	0.5	114.46
evm.model.scaffold_100.498	0	2	12.161
evm.model.scaffold_100.1699	1.45	0.55	10.057
evm.model.scaffold_100.719	0.33	1.67	119.181
evm.model.scaffold_100.335	0.78	1.22	24.376
evm.model.scaffold_100.917	1.5	0.5	88.845
evm.model.scaffold_100.1879	1	1	49.088
evm.model.scaffold_100.383	1.54	0.46	20.223
evm.model.scaffold_100.1082	1.38	0.62	17.493
evm.model.scaffold_100.1389	1.33	0.67	43.88
evm.model.scaffold_100.320	1.39	0.61	12.712
evm.model.scaffold_100.857	0.33	1.67	19.829
evm.model.scaffold_100.506	1.11	0.89	35.386
evm.model.scaffold_100.140	0	2	12.547
evm.model.scaffold_100.1063	1.2	0.8	12.221
evm.model.scaffold_100.399	1.2	0.8	15.896
evm.model.scaffold_100.493	1	1	28.449
evm.model.scaffold_100.1395	1.08	0.92	17.325
evm.model.scaffold_100.149	1.04	0.96	21.343
evm.model.scaffold_100.1671	1.05	0.95	215.952
evm.model.scaffold_100.520	0.8	1.2	12.328
evm.model.scaffold_100.1351	1.43	0.57	20.215
evm.model.scaffold_100.394	1	1	11.47
evm.model.scaffold_100.718	0.67	1.33	19.028
evm.model.scaffold_100.1654.1	1.27	0.73	29.452
evm.model.scaffold_100.908	1.24	0.76	25.985
evm.model.scaffold_100.532	1.5	0.5	15.017
evm.model.scaffold_100.1667	1.13	0.87	11.398
evm.model.scaffold_100.1744	0.5	1.5	18.41
evm.model.scaffold_100.499_evm.model.scaffold_100.500	1.38	0.63	10.402
evm.model.scaffold_100.556	0.29	1.71	24.984
evm.model.scaffold_100.54	1.42	0.58	23.381
evm.model.scaffold_100.686	0.77	1.23	21.764
evm.model.scaffold_100.1228	0.44	1.56	16.44
evm.model.scaffold_100.904	1	1	19.108
evm.model.scaffold_100.794.1	1.29	0.71	11.847
evm.model.scaffold_100.635	0.38	1.63	344.442
evm.model.scaffold_100.1745	0.8	1.2	39.109
evm.model.scaffold_100.1539	1.17	0.83	24.652
evm.model.scaffold_100.1499	0.86	1.14	11.743
evm.model.scaffold_100.1556	0.32	1.68	225.728
evm.model.scaffold_100.137	1.1	0.9	10.919
evm.model.scaffold_100.50	0.62	1.38	67.577
evm.model.scaffold_100.791.1	0.87	1.13	18.218
evm.model.scaffold_100.56.1	1.27	0.73	235.564
evm.model.scaffold_100.744	0.83	1.17	10.723
evm.model.scaffold_100.1474	1.14	0.86	20.923
evm.model.scaffold_100.1658	0.6	1.4	41.713
evm.model.scaffold_100.40	0	2	122.99
evm.model.scaffold_100.701	1.38	0.62	13.454
evm.model.scaffold_100.337	0.71	1.29	77.643
evm.model.scaffold_100.922	0.91	1.09	157.046
evm.model.scaffold_100.637	0.8	1.2	60.018
evm.model.scaffold_100.473	0.67	1.33	12.297
evm.model.scaffold_100.285	0.33	1.67	98.706
evm.model.scaffold_100.1765	1.29	0.71	20.227
evm.model.scaffold_100.833	1.38	0.62	19.454
evm.model.scaffold_100.414.1	1	1	33.74
evm.model.scaffold_100.1696	1.33	0.67	28.401
evm.model.scaffold_100.138	1.33	0.67	14.972
evm.model.scaffold_100.1421	1.48	0.52	49.572
evm.model.scaffold_100.1455	1.2	0.8	43.92
evm.model.scaffold_100.574	1.37	0.63	57.157
evm.model.scaffold_100.1153	1.03	0.97	13.098
evm.model.scaffold_100.1536	1.27	0.73	14.238
evm.model.scaffold_100.741	1.2	0.8	12.378
evm.model.scaffold_100.828	1.5	0.5	199.976
evm.model.scaffold_100.127	1.57	0.43	35.665
evm.model.scaffold_100.1160	0.35	1.65	81.843
evm.model.scaffold_100.1434	2	0	134.393
evm.model.scaffold_100.1135	1.33	0.67	28.734
evm.model.scaffold_100.1305.4	1.29	0.71	12.489
evm.model.scaffold_100.1638.2	1.65	0.35	23.781
evm.model.scaffold_100.871	1.08	0.92	44.885
evm.model.scaffold_100.290.1	1.56	0.44	49.806
evm.model.scaffold_100.652.1	0	2	23.131
evm.model.scaffold_100.345	0.5	1.5	21.871
evm.model.scaffold_100.1490	1	1	47.829
evm.model.scaffold_100.1619	0.71	1.29	10.464
evm.model.scaffold_100.217	1.08	0.92	51.201
evm.model.scaffold_100.1700	1	1	16.277
evm.model.scaffold_100.1253.2	1.28	0.72	19.459
evm.model.scaffold_100.413	0.67	1.33	41.219
evm.model.scaffold_100.182	0.91	1.09	25.417
evm.model.scaffold_100.708	1.17	0.83	12.236
evm.model.scaffold_100.1374	0.84	1.16	45.119
evm.model.scaffold_100.909	0.33	1.67	90.164
evm.model.scaffold_100.750	0.97	1.03	30.244
evm.model.scaffold_100.1316	1.27	0.73	52.699
evm.model.scaffold_100.1550	0.33	1.67	41.624
evm.model.scaffold_100.445	0.8	1.2	16.973
evm.model.scaffold_100.462.1	1.43	0.57	28.308
evm.model.scaffold_100.45	0.75	1.25	77.104
evm.model.scaffold_100.872	1	1	31.317
evm.model.scaffold_100.1223_evm.model.scaffold_100.1224	0.5	1.5	20.426
evm.model.scaffold_100.24	1.19	0.81	12.306
evm.model.scaffold_100.1749	1	1	12.887
evm.model.scaffold_100.1083	1.07	0.93	16.583
evm.model.scaffold_100.18	0.93	1.07	12.732
evm.model.scaffold_100.579	1	1	270.954
evm.model.scaffold_100.1146	1.33	0.67	24.729
evm.model.scaffold_100.344	0.33	1.67	45.523
evm.model.scaffold_100.221	1	1	14.786
evm.model.scaffold_100.1245	0.5	1.5	29.179
evm.model.scaffold_100.777	1	1	30.314
evm.model.scaffold_100.799	1.67	0.33	81.801
evm.model.scaffold_100.1412	2	0	12.472
evm.model.scaffold_100.1726	1.45	0.55	22.618
evm.model.scaffold_100.530	0.91	1.09	38.862
evm.model.scaffold_100.911	1.25	0.75	18.337
evm.model.scaffold_100.1024	1.36	0.64	61.419
evm.model.scaffold_100.1402	0.77	1.23	237.499
evm.model.scaffold_100.150	1	1	161.702
evm.model.scaffold_100.369	1.18	0.82	14.77
evm.model.scaffold_100.293	1	1	77.48
evm.model.scaffold_100.480	0.71	1.29	33.33
evm.model.scaffold_100.1298.1	0.75	1.25	77.02
evm.model.scaffold_100.770	0.67	1.33	77.733
evm.model.scaffold_100.72	1.14	0.86	2850.16
evm.model.scaffold_100.1453	1.08	0.92	16.177
evm.model.scaffold_100.222	0.94	1.06	45.439
evm.model.scaffold_100.739	1.5	0.5	45.108
evm.model.scaffold_100.1086	0.91	1.09	30.495
evm.model.scaffold_100.175	1.05	0.95	15.604
evm.model.scaffold_100.71	1.11	0.89	16.835
evm.model.scaffold_100.260.1	0.93	1.07	20.649
evm.model.scaffold_100.1080	1.42	0.58	20.244
evm.model.scaffold_100.1276	1.17	0.83	11.161
evm.model.scaffold_100.1025	1.64	0.36	19.046
evm.model.scaffold_100.1538	0.89	1.11	36.744
evm.model.scaffold_100.65	1	1	194.269
evm.model.scaffold_100.886	1.33	0.67	77.411
evm.model.scaffold_100.504	1.29	0.71	10.379
evm.model.scaffold_100.466	1.2	0.8	19.233
evm.model.scaffold_100.497	1.17	0.83	13.717
evm.model.scaffold_100.958	0.82	1.18	40.46
evm.model.scaffold_100.400	1.12	0.88	130.561
evm.model.scaffold_100.524	0.6	1.4	168.836
evm.model.scaffold_100.1280	1.54	0.46	10.157
evm.model.scaffold_100.649	1.29	0.71	15.618
evm.model.scaffold_100.449	1.03	0.97	11.779
evm.model.scaffold_100.551.1	1	1	61.354
evm.model.scaffold_100.1495	1.63	0.37	22.89
evm.model.scaffold_100.688	0.67	1.33	22.012
evm.model.scaffold_100.578.1	1.21	0.79	31.265
evm.model.scaffold_100.782	0.8	1.2	91.758
evm.model.scaffold_100.1629	1	1	251.461
evm.model.scaffold_100.126	0.75	1.25	55.959
evm.model.scaffold_100.403	0.57	1.43	181.237
evm.model.scaffold_100.1497	0.53	1.47	164.859
evm.model.scaffold_100.1819	1	1	29.393
evm.model.scaffold_100.1250	0.32	1.68	108.012
evm.model.scaffold_100.829	1.11	0.89	36.995
evm.model.scaffold_100.1124.3	1.07	0.93	51.577
evm.model.scaffold_100.66	0.95	1.05	11.083
evm.model.scaffold_100.1194	0.4	1.6	150.766
evm.model.scaffold_100.207	1.4	0.6	21.772
evm.model.scaffold_100.1035	0.73	1.27	16.817
evm.model.scaffold_100.1147	1.18	0.82	20.407
evm.model.scaffold_100.878	2	0	15.42
evm.model.scaffold_100.1045	1	1	218.415
evm.model.scaffold_100.322	1.25	0.75	20.738
evm.model.scaffold_100.1835	0	2	14.988
evm.model.scaffold_100.924	0.4	1.6	14.675
evm.model.scaffold_100.588	1.26	0.74	26.159
evm.model.scaffold_100.33	0	2	182.765
evm.model.scaffold_100.538	1.17	0.83	43.966
evm.model.scaffold_100.1771	0.86	1.14	17.658
evm.model.scaffold_100.691.1	1.39	0.61	24.675
evm.model.scaffold_100.82	0.89	1.11	15.532
evm.model.scaffold_100.557	1.07	0.93	15.378
evm.model.scaffold_100.1007	0	2	14.404
evm.model.scaffold_100.1105	0.61	1.39	127.854
evm.model.scaffold_100.1862	0.44	1.56	17.228
evm.model.scaffold_100.332	0.5	1.5	19.775
evm.model.scaffold_100.363	0.4	1.6	110.57
evm.model.scaffold_100.1747	0.57	1.43	168.202
evm.model.scaffold_100.1504	1.14	0.86	26.27
evm.model.scaffold_100.868	0.93	1.07	20.958
evm.model.scaffold_100.1282	1.21	0.79	15.045
evm.model.scaffold_100.281	0.75	1.25	173.734
evm.model.scaffold_100.1493	1	1	10.873
evm.model.scaffold_100.547	0.86	1.14	114.314
evm.model.scaffold_100.1778	1.05	0.95	17.113
evm.model.scaffold_100.573	1.2	0.8	152.336
evm.model.scaffold_100.220	1.71	0.29	33.659
evm.model.scaffold_100.402	1.09	0.91	11.611
evm.model.scaffold_100.1209	0	2	13.955
evm.model.scaffold_100.1743	0.38	1.62	35.305
evm.model.scaffold_100.55	1.6	0.4	29.214
evm.model.scaffold_100.1790	0.91	1.09	10.695
evm.model.scaffold_100.1334	1.67	0.33	31.665
evm.model.scaffold_100.1827	1.08	0.92	17.887
evm.model.scaffold_100.393	1	1	12.817
evm.model.scaffold_100.885	1.67	0.33	12.723
evm.model.scaffold_100.1090	0	2	11.386
evm.model.scaffold_100.191	1	1	12.12
evm.model.scaffold_100.279	0.5	1.5	42.634
evm.model.scaffold_100.784	1.22	0.78	34.443
evm.model.scaffold_100.1342	0.67	1.33	74.093
evm.model.scaffold_100.1293	1.17	0.83	25.577
evm.model.scaffold_100.180	0.83	1.17	277.65
evm.model.scaffold_100.145	0.67	1.33	18.877
evm.model.scaffold_100.1640	0.82	1.18	185.709
evm.model.scaffold_100.263_evm.model.scaffold_100.264	1.61	0.39	20.618
evm.model.scaffold_100.978	1	1	31.564
evm.model.scaffold_100.608	0.86	1.14	37.513
evm.model.scaffold_100.972	0.86	1.14	14.448
evm.model.scaffold_100.1358	0.36	1.64	13.173
evm.model.scaffold_100.408.2	1.26	0.74	16.979
evm.model.scaffold_100.642	0.58	1.42	48.585
evm.model.scaffold_100.155	1	1	81.14
evm.model.scaffold_100.888	0.29	1.71	12.256
evm.model.scaffold_100.1728	2	0	15.924
evm.model.scaffold_100.853	0.91	1.09	26.387
evm.model.scaffold_100.529	1.09	0.91	24.201
evm.model.scaffold_100.1370	1.4	0.6	28.951
evm.model.scaffold_100.700	0.52	1.48	88.434
evm.model.scaffold_100.1055	0.44	1.56	18.19
evm.model.scaffold_100.1760	0.55	1.45	177.58
evm.model.scaffold_100.378	0.94	1.06	18.283
evm.model.scaffold_100.536	1	1	26.225
evm.model.scaffold_100.1873	1.6	0.4	15.119
evm.model.scaffold_100.1431	1.33	0.67	36.848
evm.model.scaffold_100.716	0.2	1.8	54.49
evm.model.scaffold_100.188	1.25	0.75	353.322
evm.model.scaffold_111.119.1	1.25	0.75	13.366
evm.model.scaffold_111.80	1.47	0.53	12.025
evm.model.scaffold_111.41	1.11	0.89	65.365
evm.model.scaffold_111.111	0.4	1.6	25.364
evm.model.scaffold_111.296	0.86	1.14	19.653
evm.model.scaffold_111.190	1	1	16.832
evm.model.scaffold_111.417	1.41	0.59	35.359
evm.model.scaffold_111.9	1.24	0.76	104.918
evm.model.scaffold_111.349	1.09	0.91	17.358
evm.model.scaffold_111.432	1.5	0.5	12.461
evm.model.scaffold_111.323	1.6	0.4	50.63
evm.model.scaffold_111.30	0.8	1.2	21.755
evm.model.scaffold_111.419	1.53	0.47	43.344
evm.model.scaffold_111.97	0.88	1.13	97.545
evm.model.scaffold_111.98	1.47	0.53	36.642
evm.model.scaffold_111.92	1.89	0.11	32.062
evm.model.scaffold_111.59	0.33	1.67	38.745
evm.model.scaffold_111.408	0.89	1.11	53.787
evm.model.scaffold_111.6	0.94	1.06	15.26
evm.model.scaffold_111.281	1.43	0.57	35.723
evm.model.scaffold_111.372	0.86	1.14	34.651
evm.model.scaffold_111.283	0.73	1.27	33.201
evm.model.scaffold_111.298	0.91	1.09	75.859
evm.model.scaffold_111.345	0.97	1.03	24.809
evm.model.scaffold_111.19	1.33	0.67	28.029
evm.model.scaffold_111.336	1	1	152.962
evm.model.scaffold_111.335	1.8	0.2	10.596
evm.model.scaffold_111.293	1.4	0.6	35.589
evm.model.scaffold_111.412	0.89	1.11	159.673
evm.model.scaffold_111.195	0	2	110.671
evm.model.scaffold_111.122	1.13	0.88	21.05
evm.model.scaffold_111.387	1.17	0.83	28.577
evm.model.scaffold_111.442	0.67	1.33	43.773
evm.model.scaffold_111.75	1.11	0.89	14.622
evm.model.scaffold_111.354	2	0	55.971
evm.model.scaffold_111.45	1	1	24.627
evm.model.scaffold_111.313	1.45	0.55	32.115
evm.model.scaffold_111.381	1.47	0.53	41.698
evm.model.scaffold_111.60	0.5	1.5	16.139
evm.model.scaffold_111.93	2	0	12.403
evm.model.scaffold_111.24	0.67	1.33	26.479
evm.model.scaffold_111.37.1	1.25	0.75	49.766
evm.model.scaffold_111.25	1.35	0.65	16.52
evm.model.scaffold_111.137	1.15	0.85	215.046
evm.model.scaffold_111.71	0.57	1.43	56.777
evm.model.scaffold_111.264	0.78	1.22	40.678
evm.model.scaffold_111.141	0.94	1.06	11.695
evm.model.scaffold_111.31	0.57	1.43	21.148
evm.model.scaffold_111.276_evm.model.scaffold_111.275	1.25	0.75	13.692
evm.model.scaffold_111.321	1.75	0.25	14.407
evm.model.scaffold_111.162	1.44	0.56	11.703
evm.model.scaffold_111.386	0.33	1.67	36.156
evm.model.scaffold_111.84	1.43	0.57	12.302
evm.model.scaffold_111.171	0.85	1.15	11.998
evm.model.scaffold_111.126	1.27	0.73	10.661
evm.model.scaffold_111.132	1.14	0.86	13.72
evm.model.scaffold_111.127	1.16	0.84	29.335
evm.model.scaffold_111.81	1	1	20.046
evm.model.scaffold_111.34.1	1.47	0.53	33.378
evm.model.scaffold_111.53	0.55	1.45	71.747
evm.model.scaffold_111.340	1	1	39.099
evm.model.scaffold_111.269	1.37	0.63	30.698
evm.model.scaffold_111.268	0	0	36.07
evm.model.scaffold_111.399	0.4	1.6	36.649
evm.model.scaffold_111.250	1.43	0.57	10.195
evm.model.scaffold_111.208	0.5	1.5	16.367
evm.model.scaffold_111.401	1.44	0.56	11.489
evm.model.scaffold_111.316	1.05	0.95	237.597
evm.model.scaffold_111.297	0.8	1.2	31.406
evm.model.scaffold_111.373	1.43	0.57	68.415
evm.model.scaffold_111.331	1.29	0.71	36.741
evm.model.scaffold_111.415	1	1	116.47
evm.model.scaffold_111.291	1	1	12.674
evm.model.scaffold_111.355	0.71	1.29	49.523
evm.model.scaffold_111.304	0.8	1.2	33.534
evm.model.scaffold_111.371	0.5	1.5	27.104
evm.model.scaffold_111.32	1.18	0.82	20.495
evm.model.scaffold_111.67	1	1	154.088
evm.model.scaffold_111.70	1.04	0.96	16.271
evm.model.scaffold_111.62	1.14	0.86	13.373
evm.model.scaffold_111.346	0.44	1.56	20.321
evm.model.scaffold_111.193	0.71	1.29	14.027
evm.model.scaffold_111.270	1.02	0.98	30.495
evm.model.scaffold_111.279	1.23	0.77	15.118
evm.model.scaffold_111.128	1.43	0.57	29.938
evm.model.scaffold_111.18	0.92	1.08	35.958
evm.model.scaffold_111.36	1.6	0.4	27.495
evm.model.scaffold_111.420	1.17	0.83	21.604
evm.model.scaffold_111.142	0	2	75.388
evm.model.scaffold_111.299.1	0.67	1.33	83.035
evm.model.scaffold_111.274	1.42	0.58	22.63
evm.model.scaffold_111.170	0.86	1.14	54.613
evm.model.scaffold_111.116	1.43	0.57	11.054
evm.model.scaffold_111.289	1.33	0.67	16.448
evm.model.scaffold_111.63	1.27	0.73	20.757
evm.model.scaffold_111.46	0.78	1.22	51.015
evm.model.scaffold_111.285	1.53	0.47	32.459
evm.model.scaffold_111.351	0.57	1.43	54.701
evm.model.scaffold_111.15	1.36	0.64	11.766
evm.model.scaffold_111.61	1.05	0.95	19.498
evm.model.scaffold_111.236	1.4	0.6	36.739
evm.model.scaffold_111.196	1.33	0.67	12.362
evm.model.scaffold_111.110	0.57	1.43	11.258
evm.model.scaffold_111.147	0.13	1.88	166.594
evm.model.scaffold_111.103	0.93	1.07	719.196
evm.model.scaffold_111.254	1.25	0.75	31.727
evm.model.scaffold_111.78	1.17	0.83	43.476
evm.model.scaffold_111.352.4	1.07	0.93	28.675
evm.model.scaffold_111.160	0.53	1.47	530.064
evm.model.scaffold_111.267	1.2	0.8	19.504
evm.model.scaffold_111.260_evm.model.scaffold_111.261	1	1	25.259
evm.model.scaffold_111.385	1.09	0.91	21.455
evm.model.scaffold_111.398	0.86	1.14	39.045
evm.model.scaffold_111.69	1.18	0.82	10.489
evm.model.scaffold_111.44	0.71	1.29	347.489
evm.model.scaffold_111.290	2	0	16.105
evm.model.scaffold_111.198	1.33	0.67	11.702
evm.model.scaffold_111.319	0.77	1.23	10.735
evm.model.scaffold_111.390.2	1.67	0.33	130.203
evm.model.scaffold_23.103	1.74	0.26	14.351
evm.model.scaffold_23.16	0	2	29.278
evm.model.scaffold_23.92.1	0.82	1.18	356.697
evm.model.scaffold_23.45	1.41	0.59	17.461
evm.model.scaffold_23.49	0	2	18.174
evm.model.scaffold_23.93	0.67	1.33	20.432
evm.model.scaffold_23.22	1.2	0.8	32.917
evm.model.scaffold_23.25.1	0.5	1.5	84.389
evm.model.scaffold_23.36	0.75	1.25	22.217
evm.model.scaffold_23.12	1.16	0.84	31.929
evm.model.scaffold_23.7	1.75	0.25	17.189
evm.model.scaffold_23.17	1	1	21.705
evm.model.scaffold_23.2	1.22	0.78	33.004
evm.model.scaffold_23.6	1.33	0.67	12.526
evm.model.scaffold_23.18	2	0	19.747
evm.model.scaffold_23.8	1.36	0.64	28.413
evm.model.scaffold_23.90	1.06	0.94	29.288
evm.model.scaffold_23.48	1.2	0.8	13.129
evm.model.scaffold_335.40	0.67	1.33	26.168
evm.model.scaffold_335.11	0.35	1.65	10.094
evm.model.scaffold_335.9	1.33	0.67	83.103
evm.model.scaffold_335.32	1.35	0.65	26.984
evm.model.scaffold_335.53	0.95	1.05	89.319
evm.model.scaffold_335.24	1.56	0.44	19.59
evm.model.scaffold_335.12	1.17	0.83	24.233
evm.model.scaffold_335.8	0.35	1.65	74.953
evm.model.scaffold_335.34	0.4	1.6	33.903
evm.model.scaffold_335.30	0.94	1.06	22.451
evm.model.scaffold_335.23	1.33	0.67	15.786
evm.model.scaffold_335.5	0	0	11.28
evm.model.scaffold_335.47	1.54	0.46	10.281
evm.model.scaffold_335.1	1.6	0.4	40.658
evm.model.scaffold_335.26.2	0.86	1.14	24.77
evm.model.scaffold_335.6	1	1	11.083
evm.model.scaffold_181.28	1.33	0.67	12.149
evm.model.scaffold_181.19	0.93	1.07	26.723
evm.model.scaffold_181.20	1.67	0.33	36.724
evm.model.scaffold_181.11	1.16	0.84	569.931
evm.model.scaffold_181.24	1.6	0.4	10.327
evm.model.scaffold_181.44	1.45	0.55	11.829
evm.model.scaffold_181.56	1	1	130.005
evm.model.scaffold_181.60	0.29	1.71	69.066
evm.model.scaffold_181.55	0.43	1.57	15.536
evm.model.scaffold_181.15	0.83	1.17	22.03
evm.model.scaffold_181.32	1.55	0.45	14.921
evm.model.scaffold_6.5	1.56	0.44	10.874
evm.model.scaffold_31.82	2	0	29.092
evm.model.scaffold_31.78	1.22	0.78	11.413
evm.model.scaffold_31.26	1	1	17.917
evm.model.scaffold_31.8	1.18	0.82	56.604
evm.model.scaffold_31.63	0.86	1.14	49.038
evm.model.scaffold_31.10	0.71	1.29	19.915
evm.model.scaffold_31.100	0.57	1.43	234.02
evm.model.scaffold_31.21	1.2	0.8	391.846
evm.model.scaffold_31.25	1.33	0.67	10.573
evm.model.scaffold_31.64	1	1	13.415
evm.model.scaffold_31.118	1.2	0.8	672.478
evm.model.scaffold_31.22	0	2	120.716
evm.model.scaffold_31.124	0.29	1.71	60.215
evm.model.scaffold_31.77	0.67	1.33	840.892
evm.model.scaffold_31.19	2	0	119.592
evm.model.scaffold_31.35	1.32	0.68	16.782
evm.model.scaffold_160.14	1.28	0.72	15.712
evm.model.scaffold_160.19	0.69	1.31	26.54
evm.model.scaffold_160.13	0	2	23.273
evm.model.scaffold_160.7	1.27	0.73	35.276
evm.model.scaffold_160.25	0.67	1.33	54.134
evm.model.scaffold_160.1	1	1	23.2
evm.model.scaffold_160.6	1.25	0.75	43.346
evm.model.scaffold_421.3	1.18	0.82	14.836
evm.model.scaffold_1.2	1.31	0.69	11.393
evm.model.scaffold_3.32	1.26	0.74	19.354
evm.model.scaffold_3.66	1.5	0.5	12.218
evm.model.scaffold_3.15	1	1	12.805
evm.model.scaffold_3.31	1.14	0.86	10.844
evm.model.scaffold_3.71	1.56	0.44	11.052
evm.model.scaffold_3.85	1.04	0.96	12.646
evm.model.scaffold_3.45	0.15	1.85	14.528
evm.model.scaffold_189.19	1.22	0.78	16.407
evm.model.scaffold_189.39	1.33	0.67	11.104
evm.model.scaffold_189.86	1.23	0.77	50.35
evm.model.scaffold_189.31	1.25	0.75	25.316
evm.model.scaffold_189.11	0.67	1.33	77.597
evm.model.scaffold_189.88	1.56	0.44	14.082
evm.model.scaffold_189.82	0.73	1.27	102.259
evm.model.scaffold_189.34	1.38	0.63	128.233
evm.model.scaffold_189.40	1.25	0.75	11.909
evm.model.scaffold_189.91	1.33	0.67	14.707
evm.model.scaffold_189.97	1.45	0.55	17.527
evm.model.scaffold_189.100	1.43	0.57	17.094
evm.model.scaffold_189.18	1.18	0.82	29.808
evm.model.scaffold_189.26	1.29	0.71	10.657
evm.model.scaffold_189.46	0.57	1.43	37.825
evm.model.scaffold_189.24	0.38	1.62	88.13
evm.model.scaffold_189.72	1.33	0.67	23.273
evm.model.scaffold_189.14	1.75	0.25	74.78
evm.model.scaffold_189.76	0.38	1.62	44.235
evm.model.scaffold_189.85	0.96	1.04	24.42
evm.model.scaffold_189.55	1.11	0.89	12.846
evm.model.scaffold_189.71	0.33	1.67	21.682
evm.model.scaffold_189.62	0.96	1.04	13.603
evm.model.scaffold_189.98	1.6	0.4	29.903
evm.model.scaffold_189.89	1	1	58.281
evm.model.scaffold_189.38	0.75	1.25	22.422
evm.model.scaffold_189.45	1.56	0.44	54.874
evm.model.scaffold_189.75	1.5	0.5	86.27
evm.model.scaffold_394.385	1.67	0.33	10.612
evm.model.scaffold_394.141	1.33	0.67	60.044
evm.model.scaffold_394.537	0.33	1.67	235.313
evm.model.scaffold_394.92	0.67	1.33	143.287
evm.model.scaffold_394.320	1.2	0.8	19.789
evm.model.scaffold_394.291	1.63	0.38	59.039
evm.model.scaffold_394.65	0.8	1.2	47.28
evm.model.scaffold_394.184	1.43	0.57	192.107
evm.model.scaffold_394.5	1.27	0.73	11.169
evm.model.scaffold_394.421	0.5	1.5	41.899
evm.model.scaffold_394.176	1.08	0.92	10.544
evm.model.scaffold_394.272	1.4	0.6	62.986
evm.model.scaffold_394.536	1.11	0.89	14.064
evm.model.scaffold_394.180	1.57	0.43	41.008
evm.model.scaffold_394.195	0.89	1.11	89.703
evm.model.scaffold_394.369	1.17	0.83	11.009
evm.model.scaffold_394.185	0	0	201.135
evm.model.scaffold_394.319	0.29	1.71	48.259
evm.model.scaffold_394.162	1	1	113.701
evm.model.scaffold_394.429	0.5	1.5	17.435
evm.model.scaffold_394.40	0.75	1.25	33.186
evm.model.scaffold_394.104.1	1.33	0.67	60.189
evm.model.scaffold_394.67	0.75	1.25	32.945
evm.model.scaffold_394.508	1.11	0.89	20.7
evm.model.scaffold_394.22	1.33	0.67	72.871
evm.model.scaffold_394.170	1.38	0.62	30.07
evm.model.scaffold_394.563	1.5	0.5	69.156
evm.model.scaffold_394.527	1.56	0.44	137.265
evm.model.scaffold_394.181	0.86	1.14	43.526
evm.model.scaffold_394.490	1.23	0.77	49.711
evm.model.scaffold_394.77	0.29	1.71	28.084
evm.model.scaffold_394.292	1.82	0.18	26.68
evm.model.scaffold_394.496_evm.model.scaffold_394.497	1.12	0.88	60.767
evm.model.scaffold_394.152	0	2	143.551
evm.model.scaffold_394.270	1.33	0.67	12.855
evm.model.scaffold_394.309.2	0.96	1.04	155.297
evm.model.scaffold_394.182	1.38	0.62	15.392
evm.model.scaffold_394.529	1.53	0.47	15.484
evm.model.scaffold_394.146	1	1	41.757
evm.model.scaffold_394.495	1.54	0.46	10.504
evm.model.scaffold_394.342	1.07	0.93	167.958
evm.model.scaffold_394.441	1.45	0.55	63.242
evm.model.scaffold_394.557	1	1	41.964
evm.model.scaffold_394.553	1.21	0.79	44.799
evm.model.scaffold_394.335	0.86	1.14	10.526
evm.model.scaffold_394.428	1.2	0.8	38.206
evm.model.scaffold_394.387	0	2	170.838
evm.model.scaffold_394.351	0.71	1.29	12.864
evm.model.scaffold_394.163	0.62	1.38	50.403
evm.model.scaffold_394.58	0.15	1.85	17.168
evm.model.scaffold_394.399	1.56	0.44	20.928
evm.model.scaffold_394.535.1	1.04	0.96	81.998
evm.model.scaffold_394.547	1.37	0.63	14.716
evm.model.scaffold_394.458	0.95	1.05	21.083
evm.model.scaffold_394.8	1.13	0.87	10.094
evm.model.scaffold_394.131	1.13	0.87	37.584
evm.model.scaffold_394.459	0	2	36.113
evm.model.scaffold_394.353.2	1.14	0.86	13.486
evm.model.scaffold_394.264	1.13	0.88	21.583
evm.model.scaffold_394.147	1.45	0.55	49.839
evm.model.scaffold_394.119	1.05	0.95	13.583
evm.model.scaffold_394.519	0.89	1.11	11.277
evm.model.scaffold_394.290	1.29	0.71	11.563
evm.model.scaffold_394.517	0.73	1.27	30.63
evm.model.scaffold_394.328	1.33	0.67	143.976
evm.model.scaffold_394.372	0.17	1.83	27.496
evm.model.scaffold_394.348	0.8	1.2	78.092
evm.model.scaffold_394.20	1.6	0.4	75.435
evm.model.scaffold_394.35	0.61	1.39	31.506
evm.model.scaffold_394.114	0.5	1.5	39.083
evm.model.scaffold_394.463	1.18	0.82	74.047
evm.model.scaffold_394.167	0	2	19.171
evm.model.scaffold_394.173	0.93	1.07	80.774
evm.model.scaffold_394.395	0.86	1.14	14.444
evm.model.scaffold_394.365	0.73	1.27	12.127
evm.model.scaffold_394.410	1.15	0.85	59.014
evm.model.scaffold_394.424	0.74	1.26	654.145
evm.model.scaffold_394.214	1	1	11.818
evm.model.scaffold_394.28	0.31	1.69	23.424
evm.model.scaffold_394.134	0.6	1.4	42.397
evm.model.scaffold_394.135	0.17	1.83	105.393
evm.model.scaffold_394.312	1.2	0.8	42.427
evm.model.scaffold_394.68	1	1	122.274
evm.model.scaffold_394.212	1.17	0.83	30.825
evm.model.scaffold_394.273	1.47	0.53	12.535
evm.model.scaffold_394.357	0.8	1.2	13.251
evm.model.scaffold_394.36	1.08	0.92	24.749
evm.model.scaffold_394.108	1.27	0.73	45.399
evm.model.scaffold_394.405	0.74	1.26	17.07
evm.model.scaffold_394.346	0.46	1.54	10.351
evm.model.scaffold_394.11	0.88	1.13	49.021
evm.model.scaffold_394.226	1.06	0.94	54.384
evm.model.scaffold_394.389	1.41	0.59	20.08
evm.model.scaffold_394.337	1.2	0.8	55.205
evm.model.scaffold_394.265	1	1	46.229
evm.model.scaffold_394.59	0.25	1.75	396.268
evm.model.scaffold_394.288	1.44	0.56	27.972
evm.model.scaffold_394.445	0.86	1.14	15.385
evm.model.scaffold_394.518	0.62	1.38	338.811
evm.model.scaffold_394.564	1.14	0.86	20.9
evm.model.scaffold_394.440	1.33	0.67	10.488
evm.model.scaffold_394.340	1.24	0.76	10.919
evm.model.scaffold_394.394	1.18	0.82	25.215
evm.model.scaffold_394.350	1.26	0.74	63.837
evm.model.scaffold_394.150	1.5	0.5	91.868
evm.model.scaffold_394.43	1.2	0.8	20.155
evm.model.scaffold_394.502	0.98	1.02	21.033
evm.model.scaffold_394.388	0.71	1.29	12.359
evm.model.scaffold_394.451	1.2	0.8	29.211
evm.model.scaffold_394.522	0.64	1.36	112.923
evm.model.scaffold_394.383	1.08	0.92	21.671
evm.model.scaffold_394.362	1.13	0.87	136.347
evm.model.scaffold_394.416	1.18	0.82	21.347
evm.model.scaffold_394.192	0.8	1.2	19.926
evm.model.scaffold_394.330	1.26	0.74	28.689
evm.model.scaffold_394.126	0.65	1.35	23.19
evm.model.scaffold_394.464	1.33	0.67	91.14
evm.model.scaffold_394.120	1	1	10.344
evm.model.scaffold_394.442	0	2	68.634
evm.model.scaffold_394.548	0.5	1.5	13.044
evm.model.scaffold_394.382	0.4	1.6	952.058
evm.model.scaffold_394.138.1	1.38	0.62	16.9
evm.model.scaffold_394.512	1.82	0.18	26.105
evm.model.scaffold_394.400	1.5	0.5	184.065
evm.model.scaffold_394.66	1.11	0.89	90.925
evm.model.scaffold_394.132	1.29	0.71	12.625
evm.model.scaffold_394.154	0.88	1.13	334.172
evm.model.scaffold_394.412.1	1.2	0.8	365.343
evm.model.scaffold_394.149	1.54	0.46	11.255
evm.model.scaffold_394.555	1.33	0.67	14.003
evm.model.scaffold_394.63	1.4	0.6	34.395
evm.model.scaffold_394.552	1.08	0.92	379.606
evm.model.scaffold_394.39	2	0	48.154
evm.model.scaffold_394.140	1.43	0.57	44.481
evm.model.scaffold_394.128	0.93	1.07	24.169
evm.model.scaffold_394.551	1.02	0.98	23.387
evm.model.scaffold_394.52	1.52	0.48	10.761
evm.model.scaffold_394.300	1.05	0.95	24.083
evm.model.scaffold_394.452	1.5	0.5	38.519
evm.model.scaffold_394.136.1	0.86	1.14	34.628
evm.model.scaffold_394.413	1.43	0.57	27.718
evm.model.scaffold_394.165	1.18	0.82	27.223
evm.model.scaffold_394.446	0.56	1.44	19.32
evm.model.scaffold_394.95	0.38	1.63	30.233
evm.model.scaffold_394.225	0.5	1.5	12.654
evm.model.scaffold_394.384	1.45	0.55	50.064
evm.model.scaffold_394.112	1.18	0.82	17.73
evm.model.scaffold_394.151	0.46	1.54	36.008
evm.model.scaffold_394.531	0.5	1.5	21.438
evm.model.scaffold_394.352	2	0	334.032
evm.model.scaffold_394.558	0.92	1.08	2105.94
evm.model.scaffold_394.44	0.86	1.14	69.388
evm.model.scaffold_394.235	0.67	1.33	40.715
evm.model.scaffold_394.183	1.5	0.5	128.095
evm.model.scaffold_394.499	0.94	1.06	112.6
evm.model.scaffold_394.208	0	2	156.884
evm.model.scaffold_394.110	1.47	0.53	15.972
evm.model.scaffold_394.116	0.67	1.33	10.517
evm.model.scaffold_394.4	1.55	0.45	12.819
evm.model.scaffold_394.431	0	2	14.74
evm.model.scaffold_394.80.1	1.33	0.67	55.5
evm.model.scaffold_394.153	1.2	0.8	31.714
evm.model.scaffold_394.541	0.84	1.16	73.863
evm.model.scaffold_394.148	0	2	100.152
evm.model.scaffold_394.121	0.29	1.71	14.418
evm.model.scaffold_394.514.1	0.7	1.3	18.828
evm.model.scaffold_47.3	0.67	1.33	24.769
evm.model.scaffold_44.272	0	2	18.69
evm.model.scaffold_44.496	0.62	1.38	47.619
evm.model.scaffold_44.38	1.26	0.74	35.968
evm.model.scaffold_44.245	1.23	0.77	17.826
evm.model.scaffold_44.468	1.33	0.67	11.022
evm.model.scaffold_44.135	0.67	1.33	29.662
evm.model.scaffold_44.474	1.5	0.5	52.511
evm.model.scaffold_44.358	1.37	0.63	10.594
evm.model.scaffold_44.361	0.73	1.27	14.762
evm.model.scaffold_44.520	1	1	51.131
evm.model.scaffold_44.50	1.33	0.67	11.666
evm.model.scaffold_44.433	0.8	1.2	13.785
evm.model.scaffold_44.87	1.23	0.77	53.771
evm.model.scaffold_44.118	1.43	0.57	22.838
evm.model.scaffold_44.383	1.18	0.82	13.308
evm.model.scaffold_44.216	1.2	0.8	16.137
evm.model.scaffold_44.347	1.45	0.55	31.861
evm.model.scaffold_44.449	0.72	1.28	32.135
evm.model.scaffold_44.258	0.38	1.62	57.986
evm.model.scaffold_44.403	1.5	0.5	131.432
evm.model.scaffold_44.122	2	0	1544.53
evm.model.scaffold_44.69	0.86	1.14	11.887
evm.model.scaffold_44.379	1	1	326.863
evm.model.scaffold_44.48	1.33	0.67	20.378
evm.model.scaffold_44.219	0.8	1.2	70.364
evm.model.scaffold_44.33	1.14	0.86	10.904
evm.model.scaffold_44.42	0	2	15.272
evm.model.scaffold_44.243	1	1	55.337
evm.model.scaffold_44.273	1.33	0.67	22.678
evm.model.scaffold_44.304	1.5	0.5	10.235
evm.model.scaffold_44.287	0.67	1.33	27.036
evm.model.scaffold_44.170	0.55	1.45	21.07
evm.model.scaffold_44.390	1.56	0.44	28.679
evm.model.scaffold_44.173	1.08	0.92	15.21
evm.model.scaffold_44.335_evm.model.scaffold_44.336	1.23	0.77	34.332
evm.model.scaffold_44.24	0.89	1.11	22.753
evm.model.scaffold_44.213	1.33	0.67	11.662
evm.model.scaffold_44.244	1.25	0.75	165.418
evm.model.scaffold_44.109	1.05	0.95	11.31
evm.model.scaffold_44.257	1.6	0.4	56.816
evm.model.scaffold_44.476	1.35	0.65	30.894
evm.model.scaffold_44.454	0.76	1.24	13.607
evm.model.scaffold_44.35	1.39	0.61	17.992
evm.model.scaffold_44.128.1	1.5	0.5	12.551
evm.model.scaffold_44.512	1.06	0.94	32.226
evm.model.scaffold_44.282	1.2	0.8	24.939
evm.model.scaffold_44.368	1.2	0.8	10.248
evm.model.scaffold_44.108	0.92	1.08	28.007
evm.model.scaffold_44.256	0.92	1.08	45.76
evm.model.scaffold_44.401	1.64	0.36	443.558
evm.model.scaffold_44.348	1.79	0.21	17.205
evm.model.scaffold_44.137	1.5	0.5	18.65
evm.model.scaffold_44.505	1.33	0.67	98.374
evm.model.scaffold_44.79	1.12	0.88	41.738
evm.model.scaffold_44.382	1.85	0.15	10.818
evm.model.scaffold_44.136	1	1	14.809
evm.model.scaffold_44.504	1.25	0.75	34.399
evm.model.scaffold_44.186.1	2	0	104.368
evm.model.scaffold_44.115	0.63	1.38	267.287
evm.model.scaffold_44.290	0	2	16.063
evm.model.scaffold_44.250	1.12	0.88	143.926
evm.model.scaffold_44.58	0.8	1.2	10.271
evm.model.scaffold_44.399	1.25	0.75	29.313
evm.model.scaffold_44.503	0.95	1.05	24.023
evm.model.scaffold_44.525	1.54	0.46	17.114
evm.model.scaffold_44.308	0.86	1.14	20.983
evm.model.scaffold_44.373	1.33	0.67	63.461
evm.model.scaffold_44.489	2	0	142.816
evm.model.scaffold_44.427	1.25	0.75	11.603
evm.model.scaffold_44.154	1.09	0.91	20.626
evm.model.scaffold_44.350	1.38	0.63	35.417
evm.model.scaffold_44.330	0.93	1.07	76.132
evm.model.scaffold_44.193	1.38	0.63	10.894
evm.model.scaffold_44.283	1.31	0.69	21.143
evm.model.scaffold_44.527	1.23	0.77	21.492
evm.model.scaffold_44.305	2	0	10.667
evm.model.scaffold_44.60	0.67	1.33	34.106
evm.model.scaffold_44.29	1.09	0.91	11.763
evm.model.scaffold_44.491	1.21	0.79	16.094
evm.model.scaffold_44.469	0.86	1.14	24.9
evm.model.scaffold_44.224	0.8	1.2	50.172
evm.model.scaffold_44.483	2	0	17.067
evm.model.scaffold_44.375	1.25	0.75	76.153
evm.model.scaffold_44.112	0.71	1.29	138.258
evm.model.scaffold_44.255	0.91	1.09	37.685
evm.model.scaffold_44.362	0.68	1.32	44.772
evm.model.scaffold_44.492	0.8	1.2	144.429
evm.model.scaffold_44.310	1	1	22.307
evm.model.scaffold_44.23	0.92	1.08	25.812
evm.model.scaffold_44.384	1.2	0.8	49.245
evm.model.scaffold_44.168	0.98	1.02	27.981
evm.model.scaffold_44.116	1	1	29.926
evm.model.scaffold_44.119	1.37	0.63	14.928
evm.model.scaffold_44.331	1.4	0.6	104.161
evm.model.scaffold_44.515	0.43	1.57	70.955
evm.model.scaffold_44.155	1.2	0.8	22.26
evm.model.scaffold_44.470	0.88	1.13	10.987
evm.model.scaffold_44.86	1.3	0.7	110.48
evm.model.scaffold_44.88	1.5	0.5	15.068
evm.model.scaffold_44.77	0.97	1.03	107.994
evm.model.scaffold_44.465	0.67	1.33	12.419
evm.model.scaffold_44.428	1.16	0.84	16.145
evm.model.scaffold_44.429	0.97	1.03	13.26
evm.model.scaffold_44.90	1.35	0.65	24.317
evm.model.scaffold_44.241	1.43	0.57	306.458
evm.model.scaffold_44.400	1.27	0.73	164.473
evm.model.scaffold_44.372	1.54	0.46	179.318
evm.model.scaffold_44.265	0.67	1.33	18.2
evm.model.scaffold_44.451	1.09	0.91	16.562
evm.model.scaffold_44.286	1.33	0.67	43.938
evm.model.scaffold_44.102.1	0.83	1.17	19.232
evm.model.scaffold_44.338	1	1	15.957
evm.model.scaffold_44.374	2	0	111.309
evm.model.scaffold_44.511	1.14	0.86	54.591
evm.model.scaffold_44.344	1.07	0.93	32.558
evm.model.scaffold_44.309.2	1.36	0.64	16.284
evm.model.scaffold_44.447	0.69	1.31	11.713
evm.model.scaffold_44.131	1.33	0.67	56.644
evm.model.scaffold_44.464	0.92	1.08	29.28
evm.model.scaffold_44.54	0.44	1.56	14.304
evm.model.scaffold_44.39	1.29	0.71	29.43
evm.model.scaffold_44.461	1	1	23.516
evm.model.scaffold_44.291	0.53	1.47	22.53
evm.model.scaffold_44.249	1.21	0.79	83.449
evm.model.scaffold_16.12	0.75	1.25	106.94
evm.model.scaffold_16.13	1.33	0.67	10.734
evm.model.scaffold_16.8	1.4	0.6	20.662
evm.model.scaffold_64.22	0.86	1.14	24.522
evm.model.scaffold_64.60	0.62	1.38	22.79
evm.model.scaffold_64.30	0.22	1.78	10.976
evm.model.scaffold_64.38	0.89	1.11	29.521
evm.model.scaffold_64.18	0.32	1.68	26.462
evm.model.scaffold_64.13	1.56	0.44	35.383
evm.model.scaffold_64.67	1.23	0.77	10.678
evm.model.scaffold_64.14.2	1.36	0.64	26.492
evm.model.scaffold_64.21	1.25	0.75	310.719
evm.model.scaffold_64.3	1	1	28.889
evm.model.scaffold_64.75	1.08	0.92	10.51
evm.model.scaffold_64.37	1.36	0.64	11.887
evm.model.scaffold_64.6	0.73	1.27	78.424
evm.model.scaffold_0.16	0.53	1.47	177.02
evm.model.scaffold_0.40	1.25	0.75	11.567
evm.model.scaffold_0.64	0.67	1.33	124.139
evm.model.scaffold_0.61	1.47	0.53	15.507
evm.model.scaffold_0.39	1	1	18.174
evm.model.scaffold_0.63	1.3	0.7	15.627
evm.model.scaffold_0.9	2	0	11.339
evm.model.scaffold_0.26	1	1	11.134
evm.model.scaffold_0.69	1.3	0.7	11.252
evm.model.scaffold_290.604.1	1.1	0.9	63.849
evm.model.scaffold_290.20	1.3	0.7	129.998
evm.model.scaffold_290.237	1.24	0.76	21.634
evm.model.scaffold_290.495	1.29	0.71	15.943
evm.model.scaffold_290.629	1	1	10.085
evm.model.scaffold_290.511	2	0	35.71
evm.model.scaffold_290.342	1.12	0.88	28.416
evm.model.scaffold_290.599	0.5	1.5	1203.3
evm.model.scaffold_290.193	0.67	1.33	49.799
evm.model.scaffold_290.396	1	1	140.704
evm.model.scaffold_290.570	1.43	0.57	38.74
evm.model.scaffold_290.545	1.71	0.29	15.415
evm.model.scaffold_290.658	1.2	0.8	27.822
evm.model.scaffold_290.1	1.12	0.88	16.581
evm.model.scaffold_290.93	1.33	0.67	14.113
evm.model.scaffold_290.309.1	1.2	0.8	108.573
evm.model.scaffold_290.432	1.82	0.18	20.092
evm.model.scaffold_290.592	0.5	1.5	81.768
evm.model.scaffold_290.692	0.2	1.8	853.457
evm.model.scaffold_290.454	0.13	1.87	41.468
evm.model.scaffold_290.395	1.27	0.73	93.429
evm.model.scaffold_290.213	1.13	0.88	17.987
evm.model.scaffold_290.350	1.04	0.96	44.362
evm.model.scaffold_290.461	1.25	0.75	31.12
evm.model.scaffold_290.708	1.25	0.75	132.779
evm.model.scaffold_290.17	0.8	1.2	10.106
evm.model.scaffold_290.471	0.71	1.29	28.483
evm.model.scaffold_290.588	0.67	1.33	17.381
evm.model.scaffold_290.318	1.11	0.89	17.903
evm.model.scaffold_290.347	1.5	0.5	17.055
evm.model.scaffold_290.484	1.33	0.67	13.843
evm.model.scaffold_290.364.2	1.6	0.4	218.62
evm.model.scaffold_290.190	0.94	1.06	178.038
evm.model.scaffold_290.453	1	1	51.487
evm.model.scaffold_290.641	1.11	0.89	38.289
evm.model.scaffold_290.344	0.53	1.47	79.582
evm.model.scaffold_290.584	1.29	0.71	80.291
evm.model.scaffold_290.650	0.84	1.16	144.578
evm.model.scaffold_290.447_evm.model.scaffold_290.448	1	1	20.26
evm.model.scaffold_290.493	1.15	0.85	15.751
evm.model.scaffold_290.485	1	1	23.577
evm.model.scaffold_290.151.3	1.63	0.38	17.569
evm.model.scaffold_290.201	1.67	0.33	44.922
evm.model.scaffold_290.153.3	1.14	0.86	16.522
evm.model.scaffold_290.646	1.5	0.5	25.832
evm.model.scaffold_290.91	0.92	1.08	84.755
evm.model.scaffold_290.125	1.38	0.63	23.118
evm.model.scaffold_290.5	1.6	0.4	22.965
evm.model.scaffold_290.31	1.45	0.55	57.05
evm.model.scaffold_290.303	1	1	14.913
evm.model.scaffold_290.605	0.5	1.5	80.123
evm.model.scaffold_290.690	1.2	0.8	22.314
evm.model.scaffold_290.361	1	1	405.143
evm.model.scaffold_290.704	0	2	431.867
evm.model.scaffold_290.158	1.32	0.68	30.203
evm.model.scaffold_290.564	1	1	26.999
evm.model.scaffold_290.662	0.89	1.11	17.001
evm.model.scaffold_290.669	1.29	0.71	292.54
evm.model.scaffold_290.433	1.33	0.67	35.442
evm.model.scaffold_290.261	1.11	0.89	10.752
evm.model.scaffold_290.196	1	1	19.951
[truncated: 7,173 more rows]

## Sheet: Leu
Gene	UUA	UUG	CUU	CUC	CUA	CUG	RPKM
evm.model.scaffold_30.17	0.97	1.94	0.97	0.19	0.77	1.16	32.211
evm.model.scaffold_30.74	0.6	1.8	1.4	0.4	1	0.8	35.828
evm.model.scaffold_30.18	0.64	1.92	1.36	0.48	0.64	0.96	13.106
evm.model.scaffold_30.35	0.77	1.74	1.16	0.77	0.77	0.77	19.755
evm.model.scaffold_30.6	0.51	0.89	1.79	1.02	0.77	1.02	10.274
evm.model.scaffold_30.99.1	0.33	1	1.67	0.33	0	2.67	37.53
evm.model.scaffold_30.15	1.33	1.67	1	0.67	0.67	0.67	28.135
evm.model.scaffold_30.57	0.75	2.25	1.5	0.75	0.75	0	23.597
evm.model.scaffold_30.58	0.62	1.45	2.69	0.52	0.31	0.41	16.215
evm.model.scaffold_30.13	0.18	2.18	1.09	0.55	0.91	1.09	27.243
evm.model.scaffold_30.16	1.64	1.09	0	0.55	1.64	1.09	34.685
evm.model.scaffold_30.50	0.68	1.45	1.55	0.77	0.48	1.06	29.624
evm.model.scaffold_185.490	0.5	1	2	0.67	0.83	1	37.337
evm.model.scaffold_185.428	0.65	0.32	1.46	2.59	0.49	0.49	10.141
evm.model.scaffold_185.496	0.76	1.1	1.52	1.52	0.48	0.62	19.285
evm.model.scaffold_185.534	0.97	2.11	1.62	0.65	0.32	0.32	35.458
evm.model.scaffold_185.340.1	1.16	0.97	2.13	0.97	0.58	0.19	75.121
evm.model.scaffold_185.28	0.75	1.88	1.13	0.38	0.38	1.5	48.94
evm.model.scaffold_185.262	0.19	2.13	1.94	0.39	0.58	0.77	17.025
evm.model.scaffold_185.32	0	1.29	0	2.57	0	2.14	62.511
evm.model.scaffold_185.29	0.68	1.48	1.36	1.18	0.49	0.8	27.928
evm.model.scaffold_185.117	1	2	0.67	1.67	0.33	0.33	31.362
evm.model.scaffold_185.325	1.3	1.57	1.57	0.39	0.26	0.91	133.24
evm.model.scaffold_185.376	0.96	1.56	1.44	0.36	0.72	0.96	16.171
evm.model.scaffold_185.518	0.51	1.37	2.06	0.69	0.43	0.94	14.597
evm.model.scaffold_185.307	1.36	1.09	1.91	0.27	0.82	0.55	11.589
evm.model.scaffold_185.82	0.79	1.25	1.92	0.91	0.45	0.68	50.616
evm.model.scaffold_185.129	0.24	1.44	0.96	1.92	0.48	0.96	36.267
evm.model.scaffold_185.34	0.7	1.4	1.81	0.42	0.42	1.26	44.369
evm.model.scaffold_185.115	0	1.58	1.26	0.95	0.32	1.89	11.34
evm.model.scaffold_185.514	1.41	1.06	1.41	0.71	0.71	0.71	495.985
evm.model.scaffold_185.255	0.46	1.15	1.62	1.85	0	0.92	38.959
evm.model.scaffold_185.384	1.8	1.2	1.2	0.6	0.6	0.6	10.698
evm.model.scaffold_185.301	1	0.5	2.5	1	0	1	32.282
evm.model.scaffold_185.541	0	1.25	3	0.5	0	1.25	128.345
evm.model.scaffold_185.48	1.07	1.93	1.07	0.64	0.64	0.64	60.84
evm.model.scaffold_185.163	0.72	1.2	1.32	0.36	0.48	1.92	10.747
evm.model.scaffold_185.35	0	0.5	0	3	0	2.5	431.273
evm.model.scaffold_185.310	0.64	1.71	2.14	1.07	0.43	0	57.041
evm.model.scaffold_185.323	1	1.2	1.6	1	0.8	0.4	22.159
evm.model.scaffold_185.293	0.86	1.29	1.57	0.57	0.14	1.57	65.669
evm.model.scaffold_185.482	0	3.27	1.64	0	0	1.09	65.384
evm.model.scaffold_185.368	1.03	1.03	0.83	1.86	0.41	0.83	10.916
evm.model.scaffold_185.407	0.42	1.55	1.62	0.99	0.71	0.71	36.364
evm.model.scaffold_185.110	0.6	0.9	1.2	1.8	0.9	0.6	27.522
evm.model.scaffold_185.104	0.44	3.51	1.32	0	0	0.73	44.342
evm.model.scaffold_185.59	0.54	0.96	2.14	0.96	0.32	1.07	21.152
evm.model.scaffold_185.391	0.43	2.14	2.14	0.21	0.86	0.21	57.311
evm.model.scaffold_185.87	0.61	1.3	1.3	0.52	0.96	1.3	93.378
evm.model.scaffold_185.268	0.63	0.79	2.21	0.32	0.32	1.74	93.918
evm.model.scaffold_185.241	1.07	1.29	0.86	0.21	0.64	1.93	81.741
evm.model.scaffold_185.337_evm.model.scaffold_185.338	0.95	1.26	1.58	0.32	0.95	0.95	78.859
evm.model.scaffold_185.158	0.6	1.2	0.6	1.8	0	1.8	13.521
evm.model.scaffold_185.156	0.25	2.5	0.75	1.25	0.75	0.5	50.563
evm.model.scaffold_185.244	1.03	1.6	1.53	0.39	0.39	1.07	18.651
evm.model.scaffold_185.308	0.43	0.86	0.86	2.14	0.86	0.86	16.492
evm.model.scaffold_185.73	1.39	1.57	1.13	0.52	0.61	0.78	10.218
evm.model.scaffold_185.275	0.82	0.27	1.91	1.09	0.82	1.09	68.167
evm.model.scaffold_185.330	0.64	1.92	1.52	0.4	0.72	0.8	52.762
evm.model.scaffold_185.250	1.02	1.85	1.11	1.11	0.28	0.65	38.324
evm.model.scaffold_185.61	0.24	2.08	0.86	0.98	0.37	1.47	19.412
evm.model.scaffold_185.317	0.29	1.06	1.88	1	0.71	1.06	24.873
evm.model.scaffold_185.51	0.4	1.6	0.8	1.6	0	1.6	19.698
evm.model.scaffold_185.401	0.51	1.44	2.11	0.85	0.51	0.59	82.244
evm.model.scaffold_185.114	0.83	1.34	1.66	0.72	0.62	0.83	35.486
evm.model.scaffold_185.131	0.69	1.2	1.54	1.03	0.34	1.2	34.4
evm.model.scaffold_185.26	0.91	1.04	1.7	0.65	1.57	0.13	17.161
evm.model.scaffold_185.456	0.96	1.8	1.8	0.12	0.48	0.84	30.902
evm.model.scaffold_185.458	1	1.56	1.44	0.22	0.56	1.22	117.16
evm.model.scaffold_185.238	0.33	2.09	1.04	1.37	0.39	0.78	17.724
evm.model.scaffold_185.15	0	2.15	1.23	1.85	0.15	0.62	110.75
evm.model.scaffold_185.89	0.33	1.33	2.33	1	0.67	0.33	41.466
evm.model.scaffold_185.159	0.62	1.66	1.66	0.83	0.62	0.62	28.399
evm.model.scaffold_185.361	0.4	2	1.2	0.8	0.6	1	20.468
evm.model.scaffold_185.313	0.3	1.8	2.1	0.6	0.6	0.6	26.906
evm.model.scaffold_185.491	0.26	0.91	2.09	1.3	0.65	0.78	30.355
evm.model.scaffold_185.277	0.93	1.2	1.47	0.8	0.67	0.93	13.972
evm.model.scaffold_185.504	0.82	1.36	1.5	1.36	0.27	0.68	59.692
evm.model.scaffold_185.96	0	6	0	0	0	0	15.33
evm.model.scaffold_185.388	0.36	2.04	1.92	0.36	0.72	0.6	16.82
evm.model.scaffold_185.78	0.67	1.33	0	0.67	0	3.33	23.8
evm.model.scaffold_185.322	0	1.06	1.41	2.47	0.71	0.35	14.275
evm.model.scaffold_185.157	0	1.71	0.86	2.57	0	0.86	21.946
evm.model.scaffold_185.79	0.19	2.25	0.56	2.63	0	0.38	19.693
evm.model.scaffold_185.94	0.58	1.65	0.87	1.35	0.39	1.16	12.13
evm.model.scaffold_185.121	0.41	1.97	1.86	0.52	0.31	0.93	12.528
evm.model.scaffold_185.134	1.09	1.64	0.55	0	1.09	1.64	42.261
evm.model.scaffold_185.66_evm.model.scaffold_185.67	1	1.25	2	0.5	0.88	0.38	30.448
evm.model.scaffold_185.374	1.33	0.67	0.67	2	0.67	0.67	16.648
evm.model.scaffold_185.77	0.86	1.32	2.26	0.47	0.47	0.62	16.909
evm.model.scaffold_185.372	0	2.18	0	2.18	0.55	1.09	29.733
evm.model.scaffold_185.102	0.96	2.4	1.2	0.48	0.24	0.72	52.456
evm.model.scaffold_185.50	0.69	0.46	1.38	2.31	0.46	0.69	114.399
evm.model.scaffold_185.154	0.64	1.41	1.48	1.06	0.49	0.92	15.296
evm.model.scaffold_185.133	0.65	1.53	1.64	0.55	0.55	1.09	362.883
evm.model.scaffold_185.197	0.38	1.53	1.28	1.02	0.51	1.28	14.208
evm.model.scaffold_185.109	0.55	0.91	1.45	1.27	1.27	0.55	46.076
evm.model.scaffold_185.72	0.79	1.38	1.57	0.69	0.79	0.79	21.725
evm.model.scaffold_185.379	0.86	0.86	1.71	1.93	0.43	0.21	53.558
evm.model.scaffold_185.360	0	1.42	1.11	1.74	0.32	1.42	40.964
evm.model.scaffold_185.57	0.87	1.53	1.31	0.98	0.55	0.76	10.458
evm.model.scaffold_185.230	0.3	0.9	1.5	1.5	0.6	1.2	17.862
evm.model.scaffold_185.167	0.57	2.43	1.62	0.41	0.24	0.73	41.775
evm.model.scaffold_185.44	1.04	2.08	1.04	0.35	0.46	1.04	28.945
evm.model.scaffold_185.472	0.39	1.35	1.35	1.94	0.19	0.77	130.61
evm.model.scaffold_185.137	0.86	2.57	0.86	0	0.57	1.14	27.247
evm.model.scaffold_185.383	2.4	0.6	1.2	0	0	1.8	12.881
evm.model.scaffold_185.461	0.62	1.24	0.62	1.45	0.83	1.24	15.547
evm.model.scaffold_185.291	0.4	2.2	0.6	1.6	0.6	0.6	98.265
evm.model.scaffold_185.261	0	2	1.27	1.27	0.91	0.55	76.685
evm.model.scaffold_185.75	0.18	0.73	1.09	1.64	0	2.36	38.169
evm.model.scaffold_185.506	0.57	2	1.14	2	0.29	0	10.626
evm.model.scaffold_185.248	0	1.29	2.57	0.86	0	1.29	123.572
evm.model.scaffold_185.433	0.84	1.8	1.44	0.84	0.12	0.96	12.345
evm.model.scaffold_185.118	0.51	1.73	1.32	0.61	0.61	1.22	41.36
evm.model.scaffold_185.112	0.38	1.88	1.13	0	1.5	1.13	21.386
evm.model.scaffold_185.60	0.75	0.75	2.25	1.13	0.75	0.38	30.637
evm.model.scaffold_185.520	0	2	1.67	1	1	0.33	17.605
evm.model.scaffold_185.263	0	2.57	1.71	0.43	0.86	0.43	14.407
evm.model.scaffold_185.231	0	0.33	2.67	1	0.33	1.67	32.412
evm.model.scaffold_185.292	0.67	1.78	2	0.22	0.67	0.67	30.229
evm.model.scaffold_185.334	0.55	1.09	1.64	1.36	0.41	0.95	17.328
evm.model.scaffold_185.127	0.23	0.92	1.5	2.31	0.12	0.92	21.01
evm.model.scaffold_185.199	1.35	1.5	0.9	0.3	0.6	1.35	16.383
evm.model.scaffold_185.53	0.61	1.67	2	0.57	0.24	0.9	49.308
evm.model.scaffold_185.276	0.65	1.14	2.11	1.3	0.16	0.65	21.515
evm.model.scaffold_185.408	0.41	2.18	1.5	0.41	0.41	1.09	109.001
evm.model.scaffold_185.41	0.72	2.4	1.44	0	0.72	0.72	10.716
evm.model.scaffold_185.395	0.38	1.69	1.13	0.94	0.38	1.5	39.591
evm.model.scaffold_185.287	0.39	2.07	1.28	0.89	0.79	0.59	10.094
evm.model.scaffold_185.356	0.56	1.3	1.91	0.6	0.79	0.84	10.626
evm.model.scaffold_185.253	1.38	1.38	1.38	0.46	0.46	0.92	40.422
evm.model.scaffold_185.470	0	0.36	0.73	3.64	0.18	1.09	65.437
evm.model.scaffold_185.435	0.52	1.04	1.83	1.04	0.65	0.91	76.754
evm.model.scaffold_185.380	0.36	0.72	0.48	3	0.12	1.32	262.018
evm.model.scaffold_185.168	0.18	0.35	0.53	3.71	0.53	0.71	40.086
evm.model.scaffold_185.321	0.88	1.06	1.59	1.24	0	1.24	214.92
evm.model.scaffold_185.52	0	0	1.5	3.75	0	0.75	70.747
evm.model.scaffold_185.161	0.5	2	2.1	0.5	0	0.9	33.886
evm.model.scaffold_185.309	0.13	1.83	1.96	0.52	0.52	1.04	35.62
evm.model.scaffold_185.389	1.13	1.88	1.5	0.38	0.38	0.75	10.81
evm.model.scaffold_185.519	0.84	0.95	1.37	0.42	1.37	1.05	60.458
evm.model.scaffold_185.455	0.4	1.6	1.6	0.8	0.8	0.8	82.304
evm.model.scaffold_185.311	1.09	2.73	1.09	0	0	1.09	116.561
evm.model.scaffold_185.91	0.13	1.96	1.57	0.91	0.91	0.52	59.749
evm.model.scaffold_185.402	0	2.4	0.8	0.8	0.8	1.2	10.325
evm.model.scaffold_185.49	0.4	2.16	1.92	0.4	0.56	0.56	50.404
evm.model.scaffold_185.62	0.63	0.95	1.74	1.11	0.32	1.26	20.32
evm.model.scaffold_185.359	0.17	0.86	0.51	1.71	0.34	2.4	29.785
evm.model.scaffold_185.316	1.68	0.48	0.72	1.68	1.2	0.24	62.151
evm.model.scaffold_185.545	0.58	2.13	1.16	0.97	0.39	0.77	27.137
evm.model.scaffold_185.175	0.56	1.44	1.68	0.72	0.96	0.64	14.295
evm.model.scaffold_185.103	0.13	1.47	2.53	0.67	0.67	0.53	34.875
evm.model.scaffold_185.362.1	0.24	0.72	0.96	1.2	0	2.88	38.966
evm.model.scaffold_185.303	0.51	0.92	1.53	1.32	0.41	1.32	47.006
evm.model.scaffold_185.457	1.8	1.2	1.2	0.6	0.3	0.9	48.843
evm.model.scaffold_185.355	0.86	1.5	1.29	0.43	0.86	1.07	13.248
evm.model.scaffold_185.370	0	0.8	0.8	1.6	0.8	2	302.801
evm.model.scaffold_185.56	0.84	1.03	1.69	1.13	0.38	0.94	58.435
evm.model.scaffold_185.278	0.6	1.2	1.2	1.56	0.48	0.96	90.085
evm.model.scaffold_35.30	0.43	1.93	1.71	0.21	1.07	0.64	10.47
evm.model.scaffold_35.873	0.48	1.68	1.92	0.48	0.24	1.2	20.48
evm.model.scaffold_35.1151	0.46	1.85	1.38	0	0	2.31	23.605
evm.model.scaffold_35.449	0.83	1.66	1.81	0.31	0.57	0.83	13.498
evm.model.scaffold_35.1079	0.28	2.65	1.26	0.14	0.7	0.98	14.244
evm.model.scaffold_35.1185	0.89	1.4	2.04	1.15	0.38	0.13	12.407
evm.model.scaffold_35.369	0.56	1.88	1.5	0.94	0.38	0.75	12.687
evm.model.scaffold_35.957	0.38	1.13	2.63	1.13	0.38	0.38	10.653
evm.model.scaffold_35.177	0.75	1.75	1	0.75	1	0.75	16.177
evm.model.scaffold_35.834	0	2.62	1.85	0.62	0.15	0.77	54.159
evm.model.scaffold_35.1136	0.26	1.66	0.77	2.55	0.13	0.64	10.718
evm.model.scaffold_35.958	0.6	1	1.4	1.4	0.6	1	26.727
evm.model.scaffold_35.113	1.2	1.8	1.6	0.4	0.2	0.8	11.626
evm.model.scaffold_35.383	0.14	1.5	1.91	0.82	0.68	0.95	10.285
evm.model.scaffold_35.1090	1.5	1	0.5	0.5	1	1.5	15.366
evm.model.scaffold_35.659	0.5	1	2	1	1	0.5	29.991
evm.model.scaffold_35.522	0	2.29	0	1.14	1.14	1.43	57.863
evm.model.scaffold_35.477	0.99	1.25	1.79	0.45	0.36	1.16	13.252
evm.model.scaffold_35.404	0.92	0.92	1.85	0	0	2.31	65.319
evm.model.scaffold_35.933	0.68	0.91	1.7	1.7	0.45	0.57	57.932
evm.model.scaffold_35.168	0	1.69	1.38	0.77	0.77	1.38	29.41
evm.model.scaffold_35.227	1.5	3	0	1.5	0	0	59.361
evm.model.scaffold_35.507	1.57	2.09	0.52	0.52	0.78	0.52	12.967
evm.model.scaffold_35.907	0.41	1.45	2.07	0.41	0.14	1.52	21.188
evm.model.scaffold_35.338	0.71	1.41	1.41	0	0.35	2.12	13.344
evm.model.scaffold_35.105	1.5	1.13	1.88	0.38	0.75	0.38	30.426
evm.model.scaffold_35.1046	1.6	1.4	1.2	1.2	0.4	0.2	26.158
evm.model.scaffold_35.542	1.67	1	1.33	1.33	0.33	0.33	11.244
evm.model.scaffold_35.1001	0.62	1.66	0.83	1.03	0.83	1.03	10.697
evm.model.scaffold_35.974	0	0	3.27	0.55	0	2.18	95.771
evm.model.scaffold_35.197	0.5	1.5	1.86	0.64	0.64	0.86	222.244
evm.model.scaffold_35.239	0.89	1.67	1.97	0.2	0.49	0.79	21.896
evm.model.scaffold_35.172	1.38	2.31	0.92	0.92	0	0.46	19.062
evm.model.scaffold_35.305	0.71	1.42	1.78	0.62	0.58	0.89	20.07
evm.model.scaffold_35.478	1.06	0.88	1.76	1.24	0.53	0.53	13.988
evm.model.scaffold_35.820	0.14	0.57	1	3	0.29	1	39.067
evm.model.scaffold_35.1014	1.2	1.2	1.5	0.9	0	1.2	10.294
evm.model.scaffold_35.188	0.38	2.63	1.5	0.38	0.38	0.75	65.118
evm.model.scaffold_35.586	0.23	0.69	0.92	2.08	0.92	1.15	137.131
evm.model.scaffold_35.747	0.49	1.35	1.47	0.98	0.98	0.73	15.079
evm.model.scaffold_35.510	1.29	1.16	1.74	0.58	0.71	0.52	28.678
evm.model.scaffold_35.100	0.7	1.79	1.64	0.62	0.39	0.86	26.402
evm.model.scaffold_35.578	1	2	2	0	0	1	29.507
evm.model.scaffold_35.234	1.01	1.18	1.52	0.59	0.76	0.93	16.626
evm.model.scaffold_35.559	0.8	0.8	2.4	0.8	0.4	0.8	10.713
evm.model.scaffold_35.641	0.22	1.56	2	0.67	0.44	1.11	10.418
evm.model.scaffold_35.1028	0	0.75	0.75	3	0	1.5	45.839
evm.model.scaffold_35.670	0.46	1.23	0.77	1.69	0.77	1.08	106.343
evm.model.scaffold_35.420	0.34	1.71	1.71	0.69	1.03	0.51	10.908
evm.model.scaffold_35.902	0.38	1.28	1.15	1.79	0.38	1.02	18.403
evm.model.scaffold_35.407	1	2	0	2	0	1	34.471
evm.model.scaffold_35.620	0	2.5	0.5	1	0.5	1.5	20.129
evm.model.scaffold_35.1058	0.63	0.95	1.89	0.63	0.95	0.95	10.519
evm.model.scaffold_35.679	1.14	1.62	1.62	0.49	0.32	0.81	33.799
evm.model.scaffold_35.626	0.18	1.24	2.47	1.06	0.18	0.88	36.812
evm.model.scaffold_35.694.1	0	1.38	0.92	0.92	0.92	1.85	449.439
evm.model.scaffold_35.784_evm.model.scaffold_35.785	0.83	2.5	1.17	0.5	0.33	0.67	54.746
evm.model.scaffold_35.286	0.93	1.61	1.61	0.51	0.59	0.76	26.552
evm.model.scaffold_35.421	0.33	2.33	1.33	0.67	0.67	0.67	28.23
evm.model.scaffold_35.236	0.6	1.2	0.6	3.6	0	0	22.975
evm.model.scaffold_35.757	1.04	1.7	1.17	0.52	0.52	1.04	39.103
evm.model.scaffold_35.752	0.95	1.89	1.26	0.42	0.42	1.05	15.556
evm.model.scaffold_35.663	0.86	1.71	1.07	0	1.29	1.07	21.519
evm.model.scaffold_35.397	0.55	2.18	1.09	1.64	0	0.55	41.25
evm.model.scaffold_35.564	0.92	1.38	2.77	0.46	0.46	0	60.403
evm.model.scaffold_35.245	0.81	1.62	1.46	0.81	0.32	0.97	19.281
evm.model.scaffold_35.1022.2	0.92	1.62	1.62	0.23	0.92	0.69	11.43
evm.model.scaffold_35.618	0.44	1.02	1.9	1.61	0.44	0.59	27.205
evm.model.scaffold_35.575	0	1.71	0.86	2.23	0.86	0.34	103.766
evm.model.scaffold_35.909.2	0.41	2.48	1.45	0.41	0.41	0.83	37.948
evm.model.scaffold_35.743	0.69	1.85	1.54	0.38	0.31	1.23	20.37
evm.model.scaffold_35.1019	0	1.8	1.2	1.8	0	1.2	10.482
evm.model.scaffold_35.321	0.25	1.75	1	1.75	0.5	0.75	11.144
evm.model.scaffold_35.881	0.5	0.67	1.5	1.67	1.17	0.5	15.795
evm.model.scaffold_35.269	0.7	1.67	1.4	1.26	0.7	0.28	30.54
evm.model.scaffold_35.592	0.55	1.39	1.88	0.67	0.67	0.85	13.789
evm.model.scaffold_35.499	0	1.5	1.13	1.5	1.13	0.75	130.235
evm.model.scaffold_35.711	0.71	2.47	0.35	1.76	0	0.71	28.235
evm.model.scaffold_35.1072	0.52	1.57	1.83	0.91	0.39	0.78	26.84
evm.model.scaffold_35.466	0.75	1.5	1.63	0.63	0.88	0.63	10.31
evm.model.scaffold_35.498	0.75	1.88	1.5	0.38	0.75	0.75	12.19
evm.model.scaffold_35.668	0	0	0	3.6	1.2	1.2	19.024
evm.model.scaffold_35.729	0.43	1.29	1.71	0	0.86	1.71	12.627
evm.model.scaffold_35.894	0.67	0.67	1.5	1.67	1.17	0.33	39.09
evm.model.scaffold_35.751	1.05	1.47	1.58	0.32	0.74	0.84	13.856
evm.model.scaffold_35.792	0.81	1.73	1.63	0.92	0.51	0.41	11.286
evm.model.scaffold_35.520	2.4	0.4	0.8	0.4	0.4	1.6	23.663
evm.model.scaffold_35.328	0.21	1.71	0.86	1.5	0.64	1.07	32.118
evm.model.scaffold_35.758	0.29	1.43	1.14	0.57	0.57	2	15.173
evm.model.scaffold_35.536	0.86	1.71	1.29	0.86	0.21	1.07	20.052
evm.model.scaffold_35.547	0.3	2.36	0.59	1.77	0.2	0.79	29.957
evm.model.scaffold_35.823	0.38	3.75	0.75	0.38	0	0.75	27.735
evm.model.scaffold_35.744	0.91	1.64	0.91	0.73	1.27	0.55	28.784
evm.model.scaffold_35.252	1	0.71	1.86	0.43	0.71	1.29	21.398
evm.model.scaffold_35.419	0.43	2.57	0.43	0.86	0.43	1.29	58.566
evm.model.scaffold_35.231	0.51	0.69	1.54	2.06	0.69	0.51	11.08
evm.model.scaffold_35.633	1.2	1.2	2.4	0	1.2	0	198.451
evm.model.scaffold_35.765	0	0.26	1.04	2.61	0	2.09	55.159
evm.model.scaffold_35.39	0.38	1.75	2	0.63	0.38	0.88	12.673
evm.model.scaffold_35.150	1.26	1.58	1.58	0.63	0.95	0	52.101
evm.model.scaffold_35.88	0.68	2.05	1.09	1.09	0	1.09	11.861
evm.model.scaffold_35.311	0	0.73	2	1.64	1.09	0.55	26.493
evm.model.scaffold_35.372	1.07	1.93	1.93	0.86	0.21	0	22.755
evm.model.scaffold_35.67	0	2.29	2	0.86	0.57	0.29	43.82
evm.model.scaffold_35.87	0.67	1.67	2	0.33	0.33	1	21.89
evm.model.scaffold_35.129	0.32	2.16	1.68	0.8	0.4	0.64	19.585
evm.model.scaffold_35.952	1.27	0.73	1.64	0.64	0.45	1.27	10.244
evm.model.scaffold_35.335.1	0.58	1.35	1.35	1.74	0.39	0.58	14.852
evm.model.scaffold_35.355	0.55	2.18	1.09	0.55	1.09	0.55	15.388
evm.model.scaffold_35.198	0.53	1.41	1.76	0.53	0.71	1.06	96.011
evm.model.scaffold_35.764	0	0.52	1.04	2.61	0	1.83	27.787
evm.model.scaffold_35.99	0.78	2.1	1.4	0.55	0.23	0.94	39.585
evm.model.scaffold_35.135	0.92	0.92	2.31	0.62	0.31	0.92	24.661
evm.model.scaffold_35.793	1.5	0.75	0.75	0.75	0	2.25	78.262
evm.model.scaffold_35.84	0.35	1.94	1.24	1.41	0.35	0.71	19.373
evm.model.scaffold_35.833	0.63	1.89	1.58	0.32	0.63	0.95	24.444
evm.model.scaffold_35.488	0.67	4	0.67	0.67	0	0	26.589
evm.model.scaffold_35.414	1.43	0.29	1.14	1.43	0.86	0.86	25.675
evm.model.scaffold_35.629	0.63	1.38	1.88	0.38	1	0.75	128.702
evm.model.scaffold_35.461	0.23	1.85	1.38	0.46	0.69	1.38	49.049
evm.model.scaffold_35.1102	0.8	1.2	1.8	0.6	0.4	1.2	11.514
evm.model.scaffold_35.85	0.22	2.56	1.67	0.11	0.78	0.67	19.896
evm.model.scaffold_35.1070	0.86	1.71	1.5	0.43	0.21	1.29	13.42
evm.model.scaffold_35.924	0	1.15	0.92	2.77	0.23	0.92	32.201
evm.model.scaffold_35.755	0.6	1.2	0	1.8	0	2.4	20.317
evm.model.scaffold_35.408	0.32	2.21	1.58	0.32	1.58	0	98.672
evm.model.scaffold_35.181	0	1.09	0.55	3.27	0	1.09	151.572
evm.model.scaffold_35.1150	0.44	2.18	1.64	0.76	0.55	0.44	15.551
evm.model.scaffold_35.3	0.6	1	2.4	1.2	0.2	0.6	110.394
evm.model.scaffold_35.1171	0.45	1.81	1.36	0.91	0.34	1.13	13.717
evm.model.scaffold_35.971	0.56	0.56	1.67	1.67	0.28	1.26	37.35
evm.model.scaffold_35.737	0.35	1.41	2.12	0.35	0	1.76	101.386
evm.model.scaffold_35.115	0.82	1.36	1.77	0.89	0.48	0.68	17.022
evm.model.scaffold_35.8	0.8	0.4	2	0.4	0.8	1.6	17.901
evm.model.scaffold_35.24	0.34	1.2	2.4	0.94	0.6	0.51	29.406
evm.model.scaffold_35.801	0.29	1.66	0.65	2.02	0.29	1.08	35.834
evm.model.scaffold_35.961	0.9	1.05	1.05	1.8	0.45	0.75	42.578
evm.model.scaffold_35.762	0.82	0.82	1.18	1.06	0.24	1.88	50.784
evm.model.scaffold_35.230	1.22	1.37	1.82	0.3	0.38	0.91	20.365
evm.model.scaffold_35.1045	0	2.31	0.69	1.85	0.46	0.69	13.349
evm.model.scaffold_35.453	0.15	0.9	1.95	2.1	0.3	0.6	39.532
evm.model.scaffold_35.409	0.3	2.1	1.5	0.3	1.8	0	21.856
evm.model.scaffold_35.2	0.64	1.57	1.79	0.57	0.57	0.86	23.1
evm.model.scaffold_35.825	0.58	1.94	0.97	0.58	0.58	1.35	35.289
evm.model.scaffold_35.395	0.33	0	0.33	5	0.33	0	139.597
evm.model.scaffold_35.925	1.02	1.32	1.56	0.48	0.42	1.2	11.128
evm.model.scaffold_35.81	0.84	1.78	1.73	0.22	0.62	0.8	11.914
evm.model.scaffold_35.794	0.8	1.6	2.4	0	0.4	0.8	20.273
evm.model.scaffold_35.572	0.32	1.3	1.46	1.14	0.65	1.14	28.689
evm.model.scaffold_35.317	0	1.83	2.09	1.04	0.52	0.52	26.793
evm.model.scaffold_35.666	0.63	0.79	0.79	2.37	0.63	0.79	32.23
evm.model.scaffold_35.722	1.4	0.8	2	1	0.6	0.2	11.051
evm.model.scaffold_35.258	0.67	1.73	2	0.67	0.67	0.27	11.751
evm.model.scaffold_35.804	0.82	1.18	1.29	1.18	0.59	0.94	10.971
evm.model.scaffold_35.459	0	2.5	2	0.5	0.5	0.5	940.174
evm.model.scaffold_35.350	0.33	2.07	1.85	0.65	0.55	0.55	13.767
evm.model.scaffold_35.194	0	1	2	0	1.5	1.5	144.226
evm.model.scaffold_35.750	0.55	0.68	1.23	1.23	1.5	0.82	69.903
evm.model.scaffold_35.233	0	1.6	2.4	1.2	0	0.8	17.424
evm.model.scaffold_35.687	0.54	1.29	1.61	1.07	0.54	0.96	13.163
evm.model.scaffold_35.742	1.06	1.65	1.41	0.41	0.18	1.29	16.04
evm.model.scaffold_35.257	0.4	3.6	1.2	0	0	0.8	25.399
evm.model.scaffold_35.90	0.23	1.38	0.69	2.54	0	1.15	11.141
evm.model.scaffold_35.1055	0.55	1.09	1.64	1.09	0.55	1.09	11.093
evm.model.scaffold_35.271	0.36	1.82	1.09	0.36	0.36	2	34.085
evm.model.scaffold_35.332	0.27	1.47	1.87	0.53	0.27	1.6	21.79
evm.model.scaffold_35.728	0	1.67	1.67	1.67	0.67	0.33	47.646
evm.model.scaffold_35.625	0.67	1.33	2.22	0.22	0.67	0.89	32.752
evm.model.scaffold_35.1000	0.9	1.2	2.1	0.6	0	1.2	30.145
evm.model.scaffold_35.658	0.29	2.14	2.29	0.29	0.43	0.57	48.141
evm.model.scaffold_35.184	0.44	1.64	1.85	0.33	0.87	0.87	13.676
evm.model.scaffold_35.735	0	1	1.33	2	1	0.67	13.78
evm.model.scaffold_35.726	0.61	0.81	1.93	1.22	0.2	1.22	19.984
evm.model.scaffold_35.1083	0	0	1.5	3.5	0	1	33.221
evm.model.scaffold_35.106	1	1.4	1.6	0.2	0.6	1.2	23.633
evm.model.scaffold_35.56.2	1.2	1.8	1.2	0.2	0.8	0.8	74.286
evm.model.scaffold_35.1117	1.11	1.11	2	0.22	0.89	0.67	16.437
evm.model.scaffold_35.1039	0.56	2	1.78	0.11	0.89	0.67	12.692
evm.model.scaffold_35.48	0.6	1.46	1.8	0.34	0.86	0.94	14.012
evm.model.scaffold_35.441	0.19	0.97	1.35	1.16	0.58	1.74	11.449
evm.model.scaffold_35.169	0.22	1.89	0.94	1.28	0.17	1.5	13.794
evm.model.scaffold_35.526	0.8	1.2	1.6	1.2	0	1.2	19.637
evm.model.scaffold_35.1115	0.8	1.53	1.88	0.61	0.61	0.57	13.988
evm.model.scaffold_35.201	1.06	1.29	1.97	0.46	0.53	0.68	26.046
evm.model.scaffold_35.824	0.35	3.18	1.06	0.35	0	1.06	25.178
evm.model.scaffold_35.406	0.32	2.53	1.58	0.32	1.26	0	992.1
evm.model.scaffold_35.33	0.55	0.55	1.91	1.36	0.82	0.82	20.203
evm.model.scaffold_35.218_evm.model.scaffold_35.219	0.56	1.33	2	0.56	0.56	1	30.04
evm.model.scaffold_35.644	0.76	1.16	1.64	0.93	0.49	1.02	11.609
evm.model.scaffold_35.216	0	1	0	3.5	0.5	1	81.044
evm.model.scaffold_35.316	0.12	1.85	0.92	1.73	0.35	1.04	312.519
evm.model.scaffold_35.485	1.2	1.2	0	2.4	0	1.2	14.325
evm.model.scaffold_35.570.1	0.82	2.18	1.36	0.82	0	0.82	10.318
evm.model.scaffold_35.591	0.57	2.57	1.43	0.29	0.57	0.57	17.699
evm.model.scaffold_35.970	0	1.85	0.92	0.92	1.38	0.92	18.45
evm.model.scaffold_35.681	0.95	1.26	1.89	0.53	0.53	0.84	30.303
evm.model.scaffold_35.487	0.55	2.73	2.18	0	0.55	0	20.584
evm.model.scaffold_35.127	0	1.85	1.38	0.46	0.46	1.85	65.356
evm.model.scaffold_35.1003	0.55	1.64	2.18	1.09	0	0.55	14.642
evm.model.scaffold_35.504	1.07	1.6	1.07	0.67	0.8	0.8	11.131
evm.model.scaffold_35.790	0.43	0.86	0.86	2.14	0.43	1.29	353.399
evm.model.scaffold_35.325	0.5	1.83	2	0.5	0.67	0.5	36.79
evm.model.scaffold_35.589	0.7	1.79	1.85	0.57	0.51	0.57	10.42
evm.model.scaffold_35.327	0.38	1.13	1.88	0.75	1.13	0.75	42.288
evm.model.scaffold_35.1125	0	2	2.5	0.5	0.5	0.5	48.103
evm.model.scaffold_35.182	0.78	1.3	1.83	0.52	0.52	1.04	13.078
evm.model.scaffold_35.467	0.43	1.57	1.29	1.86	0.29	0.57	28.382
evm.model.scaffold_35.678	0	3.33	0.67	0.67	0	1.33	15.745
evm.model.scaffold_35.807	0.9	0.9	1.9	0.4	0.6	1.3	24.336
evm.model.scaffold_35.693	0.79	1.21	1.64	0.5	0.93	0.93	14.772
evm.model.scaffold_35.294	0.77	1.26	1.65	0.77	0.29	1.26	30.396
evm.model.scaffold_35.275	1.04	1.27	1.58	0.57	0.77	0.77	13.121
evm.model.scaffold_35.345	1.5	0.5	1.5	0.5	0	2	25.317
evm.model.scaffold_35.738	1.14	1.43	1.43	0.71	0.86	0.43	20.535
evm.model.scaffold_35.1004	0.69	1.54	1.54	1.03	0.51	0.69	42.085
evm.model.scaffold_35.313	0.46	2.54	1.15	0	0.69	1.15	22.351
evm.model.scaffold_35.1170	0	0.67	2	2	0	1.33	3789.21
evm.model.scaffold_35.333.1	0.73	1.76	1.76	0.73	0	1.02	12.394
evm.model.scaffold_35.208	0.09	1.29	1.29	2.06	0.26	1.03	20.546
evm.model.scaffold_35.199	0	1.09	1.64	0.55	0	2.73	15.019
evm.model.scaffold_35.246	0.51	1.37	1.2	1.37	0.86	0.69	10.598
evm.model.scaffold_35.1159	0.6	1.35	1.95	0.3	0.9	0.9	61.18
evm.model.scaffold_35.207	0	0.86	0	4.29	0.86	0	15.054
evm.model.scaffold_35.405	0.22	1.56	1.33	1.33	0.67	0.89	24.1
evm.model.scaffold_35.125	0	6	0	0	0	0	70.93
evm.model.scaffold_35.791	0.46	1.38	1.38	1.38	0	1.38	700.848
evm.model.scaffold_35.228	1.02	1.79	0.64	0.38	0.77	1.4	112.026
evm.model.scaffold_35.425	0.67	1	1.33	1.67	0.67	0.67	48.049
evm.model.scaffold_35.91	0.34	0.94	1.37	1.89	0.34	1.11	50.486
evm.model.scaffold_35.174	1.26	1.4	1.12	0.84	1.12	0.28	80.143
evm.model.scaffold_35.519	0.75	1.5	1.5	0	0.75	1.5	15.507
evm.model.scaffold_35.746	0.75	1.31	1.88	1.31	0.38	0.38	10.353
evm.model.scaffold_35.563	0	0.86	2.57	0.86	0.86	0.86	19.394
evm.model.scaffold_35.356	1.39	1.39	1.61	0.54	0.21	0.86	14.122
evm.model.scaffold_35.966	1.02	0.89	1.66	0.77	0.64	1.02	10.274
evm.model.scaffold_35.75.1	0	0	2	4	0	0	426.244
evm.model.scaffold_35.426	1.36	1.91	0.82	0.55	0.82	0.55	29.212
evm.model.scaffold_35.238	0.8	2.34	1.46	0.29	0.73	0.37	40.175
evm.model.scaffold_35.200	0.52	1.57	1.96	0.65	0.26	1.04	32.317
evm.model.scaffold_35.173	0.75	1.13	1.5	0.38	1.5	0.75	21.492
evm.model.scaffold_35.810	0.74	1.56	0.96	1.26	0.81	0.67	11.94
evm.model.scaffold_35.14	0.86	0	2.57	0.86	0	1.71	15.391
evm.model.scaffold_35.685_evm.model.scaffold_35.686	0.3	1.67	1.18	1.57	0.49	0.79	38.301
evm.model.scaffold_35.866	0.32	1.71	2.14	0.32	0.86	0.64	49.295
evm.model.scaffold_35.178	1.44	1.68	0.48	0.24	0.96	1.2	15.206
evm.model.scaffold_35.223	0.88	1.52	1.84	0.16	0.4	1.2	17.391
evm.model.scaffold_35.1017	0.11	0.68	1.36	1.58	0.45	1.81	15.147
evm.model.scaffold_35.375	0.55	2.18	0.55	1.09	1.09	0.55	15.822
evm.model.scaffold_35.7	0.88	1.4	1.5	0.62	0.67	0.93	14.251
evm.model.scaffold_35.1140	0.23	2.54	0.46	0.69	0.92	1.15	24.006
evm.model.scaffold_35.1080	0	1.38	1.38	1.38	0.46	1.38	20.52
evm.model.scaffold_35.1086	0.57	1.14	0.86	1.14	1.71	0.57	20.631
evm.model.scaffold_35.77	1.27	0.92	1.38	1.15	0.35	0.92	13.866
evm.model.scaffold_35.220	0.78	1.17	0.91	1.43	0.65	1.04	31.783
evm.model.scaffold_35.1002	1.14	1.78	0.97	0.97	0.32	0.81	14.561
evm.model.scaffold_35.1099	0.71	0.86	2.14	1.14	0.71	0.43	17.096
evm.model.scaffold_99.54	1.71	1.14	1.14	0.57	0.29	1.14	73.997
evm.model.scaffold_99.58	0.74	1.56	1.48	0.52	0.52	1.19	10.568
evm.model.scaffold_99.21	0.82	1.58	1.73	0.38	0.52	0.98	16.161
evm.model.scaffold_99.65	0.82	1.36	1.64	0.82	0.55	0.82	25.399
evm.model.scaffold_99.9	0	1.57	2.09	1.04	0.26	1.04	621.767
evm.model.scaffold_99.8	0.48	2.4	0.72	0.24	0.48	1.68	19.578
evm.model.scaffold_99.57	0	0.32	0.95	1.58	0	3.16	97.068
evm.model.scaffold_99.79	0.77	0.46	1.38	1.08	0.46	1.85	20.934
evm.model.scaffold_99.37	0.17	0.5	0.33	2.5	0.33	2.17	44.432
evm.model.scaffold_99.55	1.09	1.64	2.18	0.36	0.55	0.18	35.357
evm.model.scaffold_99.51	0	1.44	1.92	0.72	0.24	1.68	349.362
evm.model.scaffold_99.28	0.67	2.22	1.11	1.11	0	0.89	42.183
evm.model.scaffold_99.56	1.53	0.84	1.81	0.28	0.56	0.98	60.022
evm.model.scaffold_99.75	0.41	1.45	1.03	1.24	1.03	0.83	26.374
evm.model.scaffold_99.31	0	1.2	4.2	0	0.6	0	83.172
evm.model.scaffold_99.36	1.06	1.76	0.35	1.76	0	1.06	32.282
evm.model.scaffold_99.29	0	1.38	0.46	0.92	0	3.23	23.945
evm.model.scaffold_99.78	1.6	1.4	0.8	0.4	1.2	0.6	41.444
evm.model.scaffold_99.30	1.33	1.33	1.33	0.33	0.33	1.33	57.475
evm.model.scaffold_99.10	1.16	1.16	1.55	0.97	0.19	0.97	19.497
evm.model.scaffold_99.73	0.65	1.61	1.42	1.16	0.39	0.77	27.479
evm.model.scaffold_99.67	1	1.25	1.5	1	0	1.25	773.174
evm.model.scaffold_99.60	0	1.5	1.69	1.5	0.19	1.13	10.398
evm.model.scaffold_99.34	0.38	1.5	0.94	2.06	0.19	0.94	18.124
evm.model.scaffold_99.22	0.6	1.4	2.2	1	0.6	0.2	10.955
evm.model.scaffold_311.9	0	2.57	0.57	1.14	0.57	1.14	19.312
evm.model.scaffold_311.4	0.52	2.09	1.3	0.78	0.52	0.78	13.153
evm.model.scaffold_311.5	0.95	1.32	1.76	0.66	0.59	0.73	12.807
evm.model.scaffold_334.7	0.5	2.5	1.5	1	0.5	0	60.994
evm.model.scaffold_375.676	0.86	0.86	1.29	2.57	0.43	0	10.085
evm.model.scaffold_375.111	0.33	0.83	1.5	2	0.17	1.17	325.665
evm.model.scaffold_375.101_evm.model.scaffold_375.102	0.85	1.12	1.43	0.85	0.69	1.06	18.39
evm.model.scaffold_375.107	0.52	1.3	0.78	0.78	0.52	2.09	36.181
evm.model.scaffold_375.759	0.6	1.8	1.8	0.9	0.6	0.3	22.418
evm.model.scaffold_375.113	0	1.2	0.6	3.3	0	0.9	22.937
evm.model.scaffold_375.171	0.35	3.53	0.71	0	0	1.41	40.026
evm.model.scaffold_375.122	1.03	2.07	0.62	0.41	0.83	1.03	32.527
evm.model.scaffold_375.779	1.12	1.4	1.12	0.14	0.84	1.4	10.642
evm.model.scaffold_375.360	0.57	2.03	1.14	0.89	0.57	0.81	20.668
evm.model.scaffold_375.679	0.78	1.57	0.87	0.78	0.43	1.57	12.236
evm.model.scaffold_375.32	1.03	1.89	1.71	0.34	0.51	0.51	14.443
evm.model.scaffold_375.731	0.83	2.07	0.83	0.41	1.03	0.83	16.074
evm.model.scaffold_375.64.2	0.43	1.71	0.43	1.5	0.43	1.5	35.114
evm.model.scaffold_375.575	0.43	1.29	1.07	1.07	1.29	0.86	25.937
evm.model.scaffold_375.417	0.92	1.15	1.15	1.85	0.46	0.46	31.738
evm.model.scaffold_375.774	0.27	2.4	0.8	1.47	0.4	0.67	16.063
evm.model.scaffold_375.536	0.6	0.6	0	1.8	0.6	2.4	54.5
evm.model.scaffold_375.364	0.4	1.2	0.8	2	1.2	0.4	22.707
evm.model.scaffold_375.714	0	1.2	1.2	0	2.4	1.2	591.418
evm.model.scaffold_375.40	0	0.6	1.2	3.6	0	0.6	29.023
evm.model.scaffold_375.229	0.46	1.62	1.62	0.81	0.69	0.81	15.239
evm.model.scaffold_375.314	0.69	1.71	1.71	0.86	0.51	0.51	10.1
evm.model.scaffold_375.290	0	0.72	0.48	2.64	0.72	1.44	16.758
evm.model.scaffold_375.215	0.35	0.35	1.41	1.06	0.35	2.47	17.304
evm.model.scaffold_375.527.1	1.43	1.71	1.14	0.57	0.29	0.86	20.651
evm.model.scaffold_375.233	0.58	1.04	2.08	0.46	0.58	1.27	28.337
evm.model.scaffold_375.168	0.87	1.6	2.53	0.2	0.27	0.53	26.953
evm.model.scaffold_375.207	1	1.33	1	1.67	0.67	0.33	42.513
evm.model.scaffold_375.155	0.56	1.12	2.08	0.96	0.48	0.8	12.115
evm.model.scaffold_375.240	0.75	1.31	1.5	1.31	0.56	0.56	30.684
evm.model.scaffold_375.603	0.62	2.28	0.62	1.03	1.03	0.41	41.854
evm.model.scaffold_375.65	0.63	1.33	1.71	0.76	0.95	0.63	12.927
evm.model.scaffold_375.499	0	1.88	1.13	0.75	0	2.25	94.088
evm.model.scaffold_375.217	0.33	1.67	0.67	1.33	0	2	30.632
evm.model.scaffold_375.656	0.81	2.24	0.71	1.12	0.61	0.51	143.972
evm.model.scaffold_375.124	0.4	1	0.6	2	0.4	1.6	76.636
evm.model.scaffold_375.202	0.71	1.41	2.12	1.06	0	0.71	15.195
evm.model.scaffold_375.237	1.13	1	2.5	0.25	0.5	0.63	50.734
evm.model.scaffold_375.46	0.38	1.13	1.5	2.25	0	0.75	53.708
evm.model.scaffold_375.58	0.83	1.5	1.17	0.67	0.5	1.33	22.294
evm.model.scaffold_375.114	0.27	0.82	0.82	3	0	1.09	59.904
evm.model.scaffold_375.681	0.67	1.11	2.22	0.44	0.22	1.33	10.647
evm.model.scaffold_375.56	0.79	1.58	1.58	0.47	0.47	1.11	52.64
evm.model.scaffold_375.444	0.43	2.4	1.46	0.51	0.51	0.69	29.344
evm.model.scaffold_375.607.3	0.31	2	1.69	1	0.38	0.62	87.285
evm.model.scaffold_375.562	0.33	0.83	0.67	2.17	0.5	1.5	35.469
evm.model.scaffold_375.205	1.11	1.33	1.93	0.59	0.22	0.81	17.949
evm.model.scaffold_375.528	0.89	1.78	0.98	0.66	0.52	1.17	10.177
evm.model.scaffold_375.739	1.38	1.38	0.46	0.46	0.92	1.38	13.589
evm.model.scaffold_375.517	0.3	1.5	0.6	0.3	1.8	1.5	527.664
evm.model.scaffold_375.773	1.23	1.46	1.23	0.85	0.31	0.92	22.547
evm.model.scaffold_375.516	0.61	1.33	1.39	0.85	0.73	1.09	14.373
evm.model.scaffold_375.123	1.08	1.57	0.69	1.38	0.1	1.18	33.214
evm.model.scaffold_375.188	0.28	1.95	1.67	0.84	0.7	0.56	11.63
evm.model.scaffold_375.197	1	1.83	0.83	0.17	1.5	0.67	378.507
evm.model.scaffold_375.399	0	3.6	1.8	0.6	0	0	34.204
evm.model.scaffold_375.143.1	0	1.43	1.43	1.14	0.57	1.43	11.839
evm.model.scaffold_375.289	0.94	1.13	1.31	0.75	0.56	1.31	34.464
evm.model.scaffold_375.510	1.58	1.89	1.89	0	0	0.63	12.216
evm.model.scaffold_375.119	1.06	1.44	1.25	0.58	0.77	0.91	35.199
evm.model.scaffold_375.212	0.69	0.92	1.62	0.92	0.69	1.15	22.583
evm.model.scaffold_375.619	0.13	1.83	1.7	1.17	0.26	0.91	13.735
evm.model.scaffold_375.291	0.78	1.83	1.83	0.26	0.26	1.04	22.954
evm.model.scaffold_375.16	0.36	2	1.27	0.91	0.91	0.55	14.934
evm.model.scaffold_375.116	0.27	0.55	0.55	3.55	0.27	0.82	25.254
evm.model.scaffold_375.487	0.4	1.6	0.8	2.4	0.4	0.4	95.283
evm.model.scaffold_375.688	0	0.55	0.55	2.18	0.55	2.18	11.346
evm.model.scaffold_375.261.1	0.6	1.1	1.9	0.8	0.6	1	85.821
evm.model.scaffold_375.320	1.52	1.14	1.33	0.19	0.86	0.95	12.663
evm.model.scaffold_375.279	0.92	1.38	1.23	0.92	0.46	1.08	11.283
evm.model.scaffold_375.191	0.55	2.32	1.36	1.23	0	0.55	33.878
evm.model.scaffold_375.687	0.57	2.86	1.43	0.29	0.29	0.57	10.564
evm.model.scaffold_375.395	0	1.62	2.31	1.15	0.23	0.69	16.028
evm.model.scaffold_375.117	0.46	0.69	1.27	1.27	1.04	1.27	32.105
evm.model.scaffold_375.469	1.26	2.53	0.95	0	0	1.26	19.71
evm.model.scaffold_375.166	0.6	1.5	1.5	0.3	0.9	1.2	66.397
evm.model.scaffold_375.47.5	0.55	1.27	1.09	0.73	1.09	1.27	15.892
evm.model.scaffold_375.506	0.21	0.62	2.69	1.03	0.41	1.03	12.621
evm.model.scaffold_375.573	0.35	1.76	1.76	0.71	0.71	0.71	27.341
evm.model.scaffold_375.747	0.38	1.15	1.66	1.28	0.38	1.15	37.714
evm.model.scaffold_375.534	2	0	1	1	2	0	33.604
evm.model.scaffold_375.60	1.24	1.03	0.41	1.45	0.62	1.24	35.152
evm.model.scaffold_375.634	0	0	2	0	2	2	13.015
evm.model.scaffold_375.470	0	0.86	1.71	0.86	0.43	2.14	47.779
evm.model.scaffold_375.467	0.88	2.05	1.17	0.29	0.73	0.88	18.225
evm.model.scaffold_375.472	0.21	0.75	0.86	2.57	0.32	1.29	108.744
evm.model.scaffold_375.363	0.73	1.27	1.64	0.91	0.36	1.09	190.352
evm.model.scaffold_375.160	0.3	0	0.6	2.4	0	2.7	15.892
evm.model.scaffold_375.99	1.04	1.73	1.38	1.04	0.35	0.46	18.603
evm.model.scaffold_375.689	0.43	1.71	2.57	0	0.86	0.43	13.285
evm.model.scaffold_375.468	0.58	0.97	2.13	0.19	0.58	1.55	14.446
evm.model.scaffold_375.6	0.96	1.2	1.92	0.48	0.24	1.2	14.989
evm.model.scaffold_375.125	0.86	1.71	0.86	1.71	0.43	0.43	10.791
evm.model.scaffold_375.309	0.4	1.6	1.2	0.4	1.2	1.2	29.718
evm.model.scaffold_375.332	1.07	1.71	1.5	1.07	0	0.64	32.668
evm.model.scaffold_375.288	0.32	1.58	0.63	1.89	0	1.58	95.813
evm.model.scaffold_375.398	1.14	1.57	1	1.14	0.21	0.93	14.925
evm.model.scaffold_375.513	0.8	1.2	2	0.4	0.4	1.2	114.607
evm.model.scaffold_375.746	0.67	2.33	1	0.67	0.67	0.67	10.148
evm.model.scaffold_375.525	0	1.09	2.18	1.09	0.27	1.36	27.715
evm.model.scaffold_375.540	0.35	1.41	1.41	1.41	0.71	0.71	10.84
evm.model.scaffold_375.130	0	3.27	1.09	0	0.55	1.09	11.49
evm.model.scaffold_375.721	0.23	1.85	1.15	1.38	0.92	0.46	409.108
evm.model.scaffold_375.387.1	0.63	0.63	2.05	0.47	0.63	1.58	41.133
evm.model.scaffold_375.73	0.86	0.86	1.14	2.29	0	0.86	37.06
evm.model.scaffold_375.165	0.88	1.41	1.49	0.65	0.31	1.26	10.156
evm.model.scaffold_375.219	0.61	1.96	1.22	0.86	0.49	0.86	11.261
evm.model.scaffold_375.142	1	1.6	1.8	0.4	0.4	0.8	15.741
evm.model.scaffold_375.539	0	1.13	2.25	0.75	1.13	0.75	52.194
evm.model.scaffold_375.34	0.76	2.02	1.83	0.38	0.38	0.63	27.544
evm.model.scaffold_375.449	0	3.6	0.4	1.6	0	0.4	136.32
evm.model.scaffold_375.738	0.24	1.59	1.22	2.08	0.24	0.61	11.113
evm.model.scaffold_375.466	0.78	2.22	0.91	0.52	0.65	0.91	17.981
evm.model.scaffold_375.258	0.53	1.59	1.06	1.24	0.35	1.24	22.601
evm.model.scaffold_375.726	0.23	1.15	1.15	1.85	0.23	1.38	22.174
evm.model.scaffold_375.586	0.89	1.53	1.28	1.02	0.38	0.89	87.378
evm.model.scaffold_375.190	0.27	2.18	1.09	1.09	0.27	1.09	100.117
evm.model.scaffold_375.157	0.86	1.71	0.86	0.86	0.86	0.86	20.918
evm.model.scaffold_375.27	0.55	1.36	1.09	0.82	0.55	1.64	73.091
evm.model.scaffold_375.445	0.98	1.53	1.96	0.22	0.44	0.87	22.479
evm.model.scaffold_375.154	1.15	1.15	1.96	0.58	0.46	0.69	23.876
evm.model.scaffold_375.294	1.2	1.95	1.5	0.3	0.45	0.6	100.794
evm.model.scaffold_375.412_evm.model.scaffold_375.414	0.21	1.86	1.45	1.45	0.41	0.62	17.882
evm.model.scaffold_375.213	0.86	1.71	1.29	0.43	0.43	1.29	14.386
evm.model.scaffold_375.431	2.18	1.09	1.09	0.55	0.55	0.55	65.631
evm.model.scaffold_375.587	0.99	1.18	1.55	0.43	0.87	0.99	22
evm.model.scaffold_375.663	0	1.33	0	2	0	2.67	231.61
evm.model.scaffold_375.658	0.95	1.68	1.45	0.59	0.5	0.82	18.994
evm.model.scaffold_375.223	0.61	1.47	0.98	1.22	0.73	0.98	20.807
evm.model.scaffold_375.713	0.46	2.08	1.15	0.23	1.15	0.92	14.403
evm.model.scaffold_375.662	1.03	1.94	1.23	0.39	0.39	1.03	14.081
evm.model.scaffold_375.434	0.75	1.88	1.5	0.75	0.19	0.94	88.04
evm.model.scaffold_375.74.1	0.18	1.64	2.18	1.27	0.18	0.55	45.799
evm.model.scaffold_375.566	0.95	1.64	1.36	0.68	0.95	0.41	42.202
evm.model.scaffold_375.151	0.75	1.5	2.25	1.5	0	0	13.153
evm.model.scaffold_375.450	0.29	1.14	0.86	2	0.57	1.14	717.654
evm.model.scaffold_375.505	0.67	1	1.33	1.33	1.33	0.33	11.378
evm.model.scaffold_375.761	0	4.59	0	0	0	1.41	1165.56
evm.model.scaffold_375.519	0.75	1.5	0.75	1.5	0.75	0.75	88.832
evm.model.scaffold_375.426	0.7	1.47	2.17	0.89	0.26	0.51	16.636
evm.model.scaffold_375.362	0.86	1.29	1.29	0.43	1.29	0.86	204.764
evm.model.scaffold_375.730	0.86	0.86	2.57	0	0.86	0.86	32.387
evm.model.scaffold_375.707	0.96	1.68	0.96	0.96	0.24	1.2	36.461
evm.model.scaffold_375.531.1	0.15	1.17	1.17	1.61	0.44	1.46	288.149
evm.model.scaffold_375.322	0	1.2	1.89	1.71	0	1.2	68.447
evm.model.scaffold_375.43	0.47	1.26	1.11	0.63	1.11	1.42	111.748
evm.model.scaffold_375.264	0.33	1.33	1	2.33	0.33	0.67	40.149
evm.model.scaffold_375.654	0.26	1.04	1.57	1.57	0	1.57	10.984
evm.model.scaffold_375.305	1	0	1	1	1	2	171.107
evm.model.scaffold_375.598	0.89	1.78	1.11	0.89	0.67	0.67	10.444
evm.model.scaffold_375.593	0.6	1.8	1.8	0.6	0	1.2	25.96
evm.model.scaffold_375.62	0.68	1.09	2.32	0.41	0.55	0.95	76.753
evm.model.scaffold_375.256	0.43	0.86	0.86	2.57	0.43	0.86	11.784
evm.model.scaffold_375.203	0.72	1.45	1.86	0.72	0.31	0.93	38
evm.model.scaffold_375.685	0.86	1.71	0	1.71	0.43	1.29	10.034
evm.model.scaffold_375.199	0	1.88	1.13	1.88	0.38	0.75	288.562
evm.model.scaffold_375.700	0.4	0.8	1.6	1.6	0.6	1	38.446
evm.model.scaffold_375.661	0.74	1.89	1.58	0.63	0.74	0.42	32.616
evm.model.scaffold_375.36	0	1.71	1.71	1.71	0.86	0	35.996
evm.model.scaffold_375.617	0.86	0.43	1.29	1.29	0.86	1.29	46.999
evm.model.scaffold_375.743	0.29	2.2	1.46	0.29	0.59	1.17	24.865
evm.model.scaffold_375.677	0.56	1.69	2.06	0.56	0.56	0.56	23.244
evm.model.scaffold_375.596	0.21	2.36	1.29	0.64	1.07	0.43	22.134
evm.model.scaffold_375.230	0.3	1.4	2.4	1.4	0.1	0.4	43.137
evm.model.scaffold_375.353	0.6	1.6	1.1	1.1	0.8	0.8	27.612
evm.model.scaffold_375.605	0.26	1.3	1.96	1.04	0.52	0.91	114.563
evm.model.scaffold_375.418	0.75	1.88	1.13	0.75	1.31	0.19	10.107
evm.model.scaffold_375.589	0.46	1.85	0.92	1.85	0	0.92	395.193
evm.model.scaffold_375.682	0.61	1.84	1.59	0.37	0.37	1.22	28.694
evm.model.scaffold_375.750	0.66	2.04	1.58	0.53	0.66	0.53	63.288
evm.model.scaffold_375.635	1.33	2	1.33	0	0.67	0.67	18.744
evm.model.scaffold_375.321	0.33	1.78	1	1.22	0.33	1.33	21.29
evm.model.scaffold_375.271	0.86	1.37	1.89	1.2	0.34	0.34	45.442
evm.model.scaffold_375.167	0.43	0.86	3.43	0.43	0	0.86	35.908
evm.model.scaffold_375.421	1.02	1.12	1.02	0.92	1.12	0.81	19.789
evm.model.scaffold_375.136	0.46	1.15	1.38	0.69	0.69	1.62	18.116
evm.model.scaffold_375.235	0.35	0.35	1.41	1.41	0.71	1.76	11.88
evm.model.scaffold_375.109	0.6	1.8	0.6	1.5	0.3	1.2	26.268
evm.model.scaffold_375.140	0.18	1.45	0.91	2.36	0.36	0.73	10.387
evm.model.scaffold_375.218	1.27	1.91	1.27	0.28	0.56	0.71	36.619
evm.model.scaffold_375.163	0.41	1.02	1.22	1.42	1.12	0.81	28.784
evm.model.scaffold_375.481	1	1.15	1.92	0.54	0.62	0.77	13.002
evm.model.scaffold_375.352	1	1.5	1	0.5	1.5	0.5	37.638
evm.model.scaffold_375.391	0	1.09	0.41	3.95	0	0.55	37.028
evm.model.scaffold_375.601	0.5	0.5	3	0.5	0.5	1	85.327
evm.model.scaffold_375.735	0.95	1.11	2.05	0.95	0.32	0.63	41.17
evm.model.scaffold_309.24	0.43	0.86	2.14	0	0.43	2.14	123.077
evm.model.scaffold_309.31	0	0.67	1.33	3.33	0	0.67	11.956
evm.model.scaffold_309.22	1.01	1.52	1.39	0.32	0.88	0.88	13.918
evm.model.scaffold_205.119	0.94	2.12	0.82	0.24	0.47	1.41	22.122
evm.model.scaffold_205.210	0.92	0.92	1.38	1.85	0.46	0.46	61.867
evm.model.scaffold_205.147	0.8	1.2	1.5	0.6	0.8	1.1	33.987
evm.model.scaffold_205.78	0.27	0.41	0.82	2.18	0.82	1.5	25.238
evm.model.scaffold_205.118	0.83	1.21	1.47	0.83	0.64	1.02	36.026
evm.model.scaffold_205.149	0.27	1.6	0.53	1.87	0.27	1.47	29.51
evm.model.scaffold_205.129	0	0	0.43	3.86	0	1.71	152.173
evm.model.scaffold_205.79	1.2	1.2	1.2	0.8	0.4	1.2	12.543
evm.model.scaffold_205.153	1.16	0.97	1.35	1.35	0.77	0.39	37.129
evm.model.scaffold_205.219	0.32	1.58	0.32	2.53	0	1.26	79.214
evm.model.scaffold_205.166	1.5	1.35	1.35	0.45	0.75	0.6	10.96
evm.model.scaffold_205.176	0.89	1.11	0.89	1.11	0.67	1.33	20.327
evm.model.scaffold_205.167	0.6	2.1	0.6	1.2	0.3	1.2	68.996
evm.model.scaffold_205.273	0.25	2.25	1.25	1	1.25	0	16.851
evm.model.scaffold_205.220	0.11	1.47	1.36	1.25	0.79	1.02	15.156
evm.model.scaffold_205.196	0.63	1.89	1.26	0.32	0.95	0.95	11.664
evm.model.scaffold_205.141	0.36	1.09	2.55	0.82	0.27	0.91	11.866
evm.model.scaffold_205.227	0	2.57	0	0	0.86	2.57	28.934
evm.model.scaffold_205.145	0	1.67	1.81	0.84	0.14	1.53	15.472
evm.model.scaffold_205.73.1	1.12	1.12	1.81	0.56	0.84	0.56	23.831
evm.model.scaffold_205.262	0	0.6	4.2	0.2	1	0	48.382
evm.model.scaffold_205.259	0.86	0.86	1.71	1.29	0.43	0.86	14.407
evm.model.scaffold_205.272	1.09	1.23	1.77	0.41	0.41	1.09	12.061
evm.model.scaffold_205.248	0.92	1.21	1.85	0.6	0.67	0.75	12.281
evm.model.scaffold_205.185	1.09	1.45	1.64	0.55	0.73	0.55	15.708
evm.model.scaffold_205.252	0.37	1.47	0.73	2.08	0.37	0.98	34.879
evm.model.scaffold_205.218	0	1.76	0.35	2.82	0	1.06	11.581
evm.model.scaffold_205.226	0.29	2.05	0.73	1.76	0.15	1.02	61.45
evm.model.scaffold_205.263	0.4	2	1.4	0.8	0.8	0.6	19.254
evm.model.scaffold_205.271	1.33	1.17	2.5	0	0	1	33.497
evm.model.scaffold_205.168	1.15	1.38	2.31	0.92	0.23	0	32.38
evm.model.scaffold_205.148	0.35	1.76	1.76	0.88	0.35	0.88	54.526
evm.model.scaffold_205.274	0.82	1.73	1.97	0.41	0.33	0.74	17.944
evm.model.scaffold_205.224	0	1.09	1.64	1.64	0.55	1.09	273.517
evm.model.scaffold_205.173	0.8	1.2	1.4	0.8	0.6	1.2	38.474
evm.model.scaffold_205.54	0.55	1.64	1.09	0.82	0.55	1.36	22.741
evm.model.scaffold_205.192	0.91	1.96	0.91	0.78	0.52	0.91	11.794
evm.model.scaffold_205.44	0.16	0.81	1.78	0.97	1.3	0.97	10.593
evm.model.scaffold_205.127	0.19	1.5	1.88	1.88	0.19	0.38	10.409
evm.model.scaffold_205.180	0	1.71	0	3	0.43	0.86	14.664
evm.model.scaffold_205.208	0	1.5	0	1.5	1.5	1.5	14.66
evm.model.scaffold_205.260	0	0.61	0.24	3.31	0.12	1.71	44.74
evm.model.scaffold_476.10	0	1.8	0.6	0.6	1.2	1.8	38.296
evm.model.scaffold_476.9	0.26	1.57	2.35	1.3	0.52	0	103.493
evm.model.scaffold_324.17	1.06	1.06	1.06	1.06	0	1.76	38.676
evm.model.scaffold_324.39	1.04	0.52	2.09	1.04	0.78	0.52	17.841
evm.model.scaffold_324.29	0	1.29	0.64	3	0.32	0.75	10.771
evm.model.scaffold_324.32	0.81	1.16	2.06	0.99	0.27	0.72	14.186
evm.model.scaffold_324.23	1.2	1.2	0.6	0.6	0	2.4	10.063
evm.model.scaffold_324.43	1.2	1.2	2.4	0.9	0.3	0	46.8
evm.model.scaffold_324.24	0.63	1.34	1.89	0.39	0.79	0.95	10.756
evm.model.scaffold_324.2	0.24	0.82	1.06	2.71	0.12	1.06	15.578
evm.model.scaffold_324.42	0.51	2.06	1.11	1.11	0.51	0.69	16.676
evm.model.scaffold_324.31	1.3	0.78	0.78	1.57	0.52	1.04	37.877
evm.model.scaffold_37.114.1	1.06	0.35	0.35	2.47	1.06	0.71	53.379
evm.model.scaffold_37.91.1	1.09	2.18	1.64	0.82	0.27	0	47.064
evm.model.scaffold_37.132	0.6	1.8	2.4	0.6	0	0.6	51.22
evm.model.scaffold_37.131	0.75	0.75	1.88	0.75	0.38	1.5	62.719
evm.model.scaffold_37.17	0.75	2.25	0.75	0.6	0.6	1.05	155.354
evm.model.scaffold_37.70	0.98	1.81	1.67	0.28	0.7	0.56	12.472
evm.model.scaffold_37.37	0.67	2.67	2	0	0	0.67	2830.09
evm.model.scaffold_37.115	0.1	1.66	1.34	1.55	0.72	0.62	11.308
evm.model.scaffold_37.52	0.9	2.55	1.5	0.3	0.6	0.15	12.628
evm.model.scaffold_37.72	0.5	2.33	1.33	0.5	0	1.33	23.068
evm.model.scaffold_37.61	1.64	2.73	0.55	0.55	0	0.55	101.395
evm.model.scaffold_37.137_evm.model.scaffold_37.138	0.41	1.24	1.24	1.76	0.62	0.72	26.812
evm.model.scaffold_37.43	0.6	2.4	1.2	0	0	1.8	275.277
evm.model.scaffold_37.141	0.52	2.61	1.57	0.26	0.52	0.52	55.321
evm.model.scaffold_37.90	0	2.08	0.92	1.38	0.92	0.69	35.322
evm.model.scaffold_37.71	0.62	1.24	1.03	2.07	0.62	0.41	24.707
evm.model.scaffold_37.18	0.38	2.25	1.88	0.38	0.75	0.38	39.432
evm.model.scaffold_37.144	0.48	2.16	1.68	0.48	0.96	0.24	17.296
evm.model.scaffold_37.41	0.67	2.67	2	0	0	0.67	1912.36
evm.model.scaffold_37.116	0.95	1.58	1.58	0.63	0.95	0.32	31.675
evm.model.scaffold_37.143	0.67	0.89	2.67	0.22	1.11	0.44	30.224
evm.model.scaffold_37.24.1	0.89	1.96	1.45	0.55	0.55	0.6	19.683
evm.model.scaffold_37.19	0.95	1.7	1.62	0.47	0.67	0.59	23.471
evm.model.scaffold_37.63	1.14	1.03	1.24	0.72	0.93	0.93	38.16
evm.model.scaffold_37.39	0.67	2.67	2	0	0	0.67	3520.39
evm.model.scaffold_21.69	0.69	2.08	1.62	0.46	0.46	0.69	16.751
evm.model.scaffold_21.21	0.63	1.26	1.58	0.95	0.47	1.11	53.49
evm.model.scaffold_21.19	1.07	1.33	1.87	0.13	0.53	1.07	14.806
evm.model.scaffold_21.39	0	1.5	0.86	2.14	0.64	0.86	63.041
evm.model.scaffold_21.46	0	1.27	0.91	1.82	0.36	1.64	48.906
evm.model.scaffold_21.22	1.33	1.78	1.56	0.67	0.22	0.44	10.572
evm.model.scaffold_21.32	1.17	1.3	1.83	0.52	0.78	0.39	17.285
evm.model.scaffold_21.38	0.83	1.5	1.67	0.5	0.33	1.17	29.177
evm.model.scaffold_21.53	0.67	1.7	1.78	0.51	0.47	0.87	58.708
evm.model.scaffold_21.17	2	1.5	0.5	0	0	2	10.039
evm.model.scaffold_21.54	0.44	1.56	1.56	2	0.22	0.22	12.417
evm.model.scaffold_21.42	0.62	2	1.23	0.92	0.46	0.77	40.068
evm.model.scaffold_21.58	0.82	1.41	1.06	0.94	0.35	1.41	22.509
evm.model.scaffold_21.59	0.6	0.6	1.8	1.2	0.3	1.5	247.463
evm.model.scaffold_21.60	0.39	1.16	1.84	0.68	1.06	0.87	13.741
evm.model.scaffold_21.71	0.99	2.04	1.49	0.44	0.44	0.61	41.299
evm.model.scaffold_12.101	0.32	0.95	2.21	1.26	0.63	0.63	55.485
evm.model.scaffold_12.230	0.91	1.81	1.7	0.57	0.23	0.79	96.803
evm.model.scaffold_12.75	1.29	1.71	1.29	0.86	0	0.86	50.502
evm.model.scaffold_12.140	0.36	1.09	3.09	0.91	0	0.55	315.473
evm.model.scaffold_12.278	0.64	0.96	1.6	0.72	0.96	1.12	14.371
evm.model.scaffold_12.320.1	0.82	2.73	1.64	0.27	0.55	0	246.933
evm.model.scaffold_12.66	0.6	1.8	1.5	0.3	0.9	0.9	11.779
evm.model.scaffold_12.271	0	2.18	2	1.27	0.18	0.36	37.354
evm.model.scaffold_12.41	0.6	1.2	1.8	1.2	0.6	0.6	32.97
evm.model.scaffold_12.170	0.31	1.38	1.85	1.08	0.77	0.62	36.638
evm.model.scaffold_12.215	0	1.2	2.4	1.8	0	0.6	66.505
evm.model.scaffold_12.127.3	1.24	2.29	0.88	0.53	0.71	0.35	38.167
evm.model.scaffold_12.272.1	0.84	0.91	2.51	0.42	0.49	0.84	28.749
evm.model.scaffold_12.146.1	0.72	1.8	1.68	0.24	0.36	1.2	20.861
evm.model.scaffold_12.201	0.19	1.55	0.39	3.68	0	0.19	34.015
evm.model.scaffold_12.28	0.43	2.14	1.71	0.43	0	1.29	34.304
evm.model.scaffold_12.240	0.55	0.55	1.64	1.64	1.09	0.55	45.1
evm.model.scaffold_12.274.3	0.46	1.15	1.38	1.38	0.69	0.92	29.21
evm.model.scaffold_12.306	0.57	1.58	2.04	0.45	0.23	1.13	16.68
evm.model.scaffold_12.71	0.36	0.96	2.16	0.24	0.96	1.32	31.796
evm.model.scaffold_12.244.1	2.11	1.3	0.97	0.16	0.97	0.49	10.993
evm.model.scaffold_12.74	0	1.71	2	0.57	0	1.71	152.915
evm.model.scaffold_12.86	1.07	2.15	1.52	0.36	0.45	0.45	16.651
evm.model.scaffold_12.232	0.53	1.6	2.53	0.93	0.27	0.13	558.477
evm.model.scaffold_12.226	1.38	1.15	1.62	0.92	0.69	0.23	13.348
evm.model.scaffold_12.33	0	0.86	1.29	1.29	0.43	2.14	50.097
evm.model.scaffold_12.248	0.39	1.74	1.55	0.77	0.58	0.97	17.03
evm.model.scaffold_12.221.2	0.71	1.57	2.29	0.71	0.14	0.57	124.78
evm.model.scaffold_12.158	0.77	1.55	1.35	0.97	0.77	0.58	16.434
evm.model.scaffold_12.204	0.38	0.75	1.88	1.5	0	1.5	19.183
evm.model.scaffold_12.149	0.71	2.12	1.06	0.35	0	1.76	14.832
evm.model.scaffold_12.253	0.46	1.85	0.92	1.85	0.46	0.46	16.498
evm.model.scaffold_12.222	0.3	2.1	0.9	0.9	0.9	0.9	61.873
evm.model.scaffold_12.288	0.61	1.22	0.92	2.24	0.41	0.61	15.467
evm.model.scaffold_12.36	0	1.29	0.86	1.29	0.86	1.71	58.033
evm.model.scaffold_12.276	0.43	0.86	1.93	1.29	0.64	0.86	43.924
evm.model.scaffold_12.298	1.2	1.2	1.2	1.2	0	1.2	55.917
evm.model.scaffold_12.80	0.55	1.64	0.55	1.64	0.55	1.09	31.601
evm.model.scaffold_12.314	0.8	1.6	1.87	0.4	0.93	0.4	51.31
evm.model.scaffold_176.314	0.75	0.75	2.25	0	0	2.25	51.952
evm.model.scaffold_176.163	0.4	1.6	1.3	1.2	0.4	1.1	39.189
evm.model.scaffold_176.196	0	1.8	1.8	1.8	0.6	0	13.336
evm.model.scaffold_176.272	0.94	2.06	1.5	0.19	0.75	0.56	14.558
evm.model.scaffold_176.291	0	2.12	1.59	1.06	0.35	0.88	18.94
evm.model.scaffold_176.22	0.87	1.65	1.55	0.29	0.48	1.16	22.326
evm.model.scaffold_176.260	1.33	0.67	1.33	1.33	0.67	0.67	14.834
evm.model.scaffold_176.12.1	0.8	1.36	1.76	0.88	0.56	0.64	14.735
evm.model.scaffold_176.130	0.75	1.5	2.25	0.25	0.25	1	18.712
evm.model.scaffold_176.323.4	0.54	1.31	1.92	0.85	0.69	0.69	89.042
evm.model.scaffold_176.315	0	2.77	1.85	0	0.46	0.92	12.645
evm.model.scaffold_176.76	0.92	0.46	1.38	1.85	0.46	0.92	10.292
evm.model.scaffold_176.295	0.67	2	2	1.33	0	0	64.266
evm.model.scaffold_176.89	0.6	1.65	1.65	1.2	0.45	0.45	134.818
evm.model.scaffold_176.335	0.92	0.69	2.31	0.69	0.46	0.92	13.904
evm.model.scaffold_176.240	0	1.25	0.75	3	0.25	0.75	84.106
evm.model.scaffold_176.133	0.84	2.09	1.26	0.42	0.84	0.56	92.595
evm.model.scaffold_176.60	0.26	2.22	1.17	0.98	0.46	0.91	17.809
evm.model.scaffold_176.170	0.45	1.95	1.05	1.2	0.75	0.6	62.774
evm.model.scaffold_176.73	1.06	0.35	1.76	1.76	0.71	0.35	154.063
evm.model.scaffold_176.276	0.92	1.33	1.92	0.42	0.58	0.83	19.628
evm.model.scaffold_176.6_evm.model.scaffold_176.7	0.76	0.98	1.64	1.2	0.76	0.65	40.336
evm.model.scaffold_176.216	0.86	1.71	0.86	1.71	0.86	0	134.411
evm.model.scaffold_176.327.1	1.5	1.88	0.75	0.38	0.75	0.75	10.556
evm.model.scaffold_176.296	0.67	1.78	2	0.67	0	0.89	123.244
evm.model.scaffold_176.262	1.32	1.08	1.8	0.84	0.36	0.6	24.789
evm.model.scaffold_176.242	0.75	2.25	0	1.5	0	1.5	105.652
evm.model.scaffold_176.161	0.23	1.15	2.54	0.92	0.23	0.92	55.042
evm.model.scaffold_176.138.1	0.9	1.35	1.35	0.15	1.2	1.05	14.945
evm.model.scaffold_176.54	0.8	1.87	1.2	0.67	0.27	1.2	14.296
evm.model.scaffold_176.172	0.63	1.89	0.63	0.95	0.63	1.26	10.002
evm.model.scaffold_176.35	1.2	1.2	1.87	0.4	0.4	0.93	34.293
evm.model.scaffold_176.220	0.19	2.32	1.16	1.16	0.19	0.97	50.928
evm.model.scaffold_176.80	1.29	0.43	1.71	1.71	0.43	0.43	1304.21
evm.model.scaffold_176.241	0	2	2.33	0.33	0.33	1	130.642
evm.model.scaffold_176.92	0.83	1.14	1.66	0.62	0.62	1.14	15.457
evm.model.scaffold_176.290	0	0	0.72	3.6	0	1.68	147.438
evm.model.scaffold_176.186	2	2	2	0	0	0	55.23
evm.model.scaffold_176.64.1	1.06	1.65	1.74	0.1	0.58	0.87	76.225
evm.model.scaffold_176.210	0	2	1	0	0.5	2.5	19.966
evm.model.scaffold_176.188	1.29	0.64	2.14	0.21	0.64	1.07	37.143
evm.model.scaffold_176.279	0.48	1.08	1.32	1.32	0.48	1.32	25.686
evm.model.scaffold_176.243	0.83	1.32	1.65	0.94	0.33	0.94	15.763
evm.model.scaffold_176.78	0.55	0.55	2.18	2.73	0	0	2330.76
evm.model.scaffold_176.218.1	0.71	2.12	1.59	0.53	0.35	0.71	29.516
evm.model.scaffold_176.305	0.82	1.64	1.09	1.64	0	0.82	45.524
evm.model.scaffold_176.199	1	1	2.29	0.43	0.14	1.14	63.044
evm.model.scaffold_176.228	0.56	1.5	1.13	1.31	0.75	0.75	15.492
evm.model.scaffold_176.151	0.86	1.29	1.71	1.29	0	0.86	12.793
evm.model.scaffold_176.132	1.08	2	0.77	0.92	0.23	1	15.775
evm.model.scaffold_176.277	0.67	2	2.33	0.33	0.33	0.33	17.413
evm.model.scaffold_176.235	0	2.67	0	2	0.67	0.67	130.327
evm.model.scaffold_176.267	0.67	1.2	1.73	0.67	0.53	1.2	11.168
evm.model.scaffold_176.261	0	0.33	1	2.33	0.67	1.67	17.114
evm.model.scaffold_176.316	0.51	1.32	2.34	0.31	0.51	1.02	36.437
evm.model.scaffold_176.329	0	0.71	1.41	1.76	0	2.12	16.688
evm.model.scaffold_176.165	0.49	2.35	1.54	0.41	0.73	0.49	12.097
evm.model.scaffold_176.238	0	1	3	1.5	0	0.5	98.161
evm.model.scaffold_176.332	0.6	0.6	1.8	1.2	0	1.8	16.524
evm.model.scaffold_176.79	0.8	0.8	2.4	1.6	0	0.4	3227.67
evm.model.scaffold_176.213	1.04	1.04	1.57	1.83	0	0.52	57.327
evm.model.scaffold_176.298	0.78	1.04	1.43	1.43	0.39	0.91	101.176
evm.model.scaffold_176.265	0.36	1.82	1.64	1.03	0.42	0.73	15.358
evm.model.scaffold_176.139	0.46	2.54	0.92	0.23	0.69	1.15	48.548
evm.model.scaffold_176.169	1.13	2.63	1.88	0.38	0	0	18.492
evm.model.scaffold_176.74	0	0.46	2.31	1.85	0.46	0.92	22.479
evm.model.scaffold_176.131	1.04	1.57	1.57	0.39	0.78	0.65	10.651
evm.model.scaffold_176.246	0.7	2.09	1.4	0.42	0.42	0.98	34.023
evm.model.scaffold_176.104	0.43	1.07	1.93	0.64	0.86	1.07	48.051
evm.model.scaffold_176.77	0.86	0.43	2.14	1.71	0.43	0.43	1305.81
evm.model.scaffold_176.266	0	1.91	0.82	1.09	0.55	1.64	77.914
evm.model.scaffold_176.330	0.29	2.57	0.57	2	0	0.57	14.233
evm.model.scaffold_176.264	0.4	0	2.8	0.4	1.2	1.2	40.114
evm.model.scaffold_176.200	0.43	0.43	2.14	2.14	0.86	0	20.215
evm.model.scaffold_176.278	0	1.06	1.06	1.76	0	2.12	74.605
evm.model.scaffold_176.103	0.69	0.92	1.62	1.15	0.69	0.92	13.933
evm.model.scaffold_176.333	0.71	2.29	1.24	0.18	0.71	0.88	20.279
evm.model.scaffold_176.83	0.4	2	1.2	0	0.4	2	235.166
evm.model.scaffold_176.287	0.44	1.78	1.56	0.89	0.22	1.11	71.355
evm.model.scaffold_176.212	0.49	1.48	1.28	0.79	1.08	0.89	75.794
evm.model.scaffold_176.337	1.3	1.26	1.61	0.52	0.7	0.61	30.401
evm.model.scaffold_176.156	1.13	1.13	1.69	0.75	0.56	0.75	1179.08
evm.model.scaffold_176.282	0	0.77	0.58	2.32	0	2.32	66.511
evm.model.scaffold_176.297	0.19	1.5	1.88	0.56	0.75	1.13	118.857
evm.model.scaffold_176.178	0	1.8	2.4	1.2	0.6	0	29.092
evm.model.scaffold_176.289	1	1.67	2	0.67	0	0.67	40.042
evm.model.scaffold_176.203	0.38	0.89	2.43	0.38	0.64	1.28	18.779
evm.model.scaffold_176.8	0.39	1.57	1.3	0.65	0.91	1.17	48.822
evm.model.scaffold_41.38	0.46	2.31	1.38	0.92	0.92	0	53.104
evm.model.scaffold_41.24	0.9	1.6	1.5	0.6	0.6	0.8	10.044
evm.model.scaffold_41.48	0	1.85	1.85	0.46	0	1.85	27.678
evm.model.scaffold_41.14	0	0	1.2	1.6	0.8	2.4	48.18
evm.model.scaffold_41.16	0	0.57	1.71	2.29	0	1.43	28.924
evm.model.scaffold_41.26	0	2.1	0.6	1.2	0.3	1.8	23.1
evm.model.scaffold_464.1	0.75	0.75	0	3	0	1.5	14.649
evm.model.scaffold_60.15	1.64	1.09	0.55	1.09	0	1.64	85.692
evm.model.scaffold_60.41	1.22	1.29	1.14	0.68	0.68	0.99	11.29
evm.model.scaffold_60.56	0.25	2	2	0.5	0.5	0.75	11.555
evm.model.scaffold_60.21	0.27	3.55	0.55	0.82	0.27	0.55	20.949
evm.model.scaffold_60.54	0.2	1.6	2	0.2	0.6	1.4	10.69
evm.model.scaffold_60.51.1	1.6	1.2	2.8	0	0.4	0	15.65
evm.model.scaffold_60.25	0.89	1.33	1.33	0.67	0.89	0.89	15.743
evm.model.scaffold_168.26	0.35	1.06	0.71	2.12	0.71	1.06	14.586
evm.model.scaffold_168.24	0	0.67	0.67	2.67	0	2	10.978
evm.model.scaffold_168.3	0.48	0.48	0.96	2.4	0	1.68	17.578
evm.model.scaffold_168.31	0.21	1.45	1.24	2.28	0.41	0.41	10.145
evm.model.scaffold_168.40	0.29	0.73	0.88	2.34	0.44	1.32	51.718
evm.model.scaffold_168.45	0.36	1.64	0.91	1.09	0.73	1.27	34.437
evm.model.scaffold_168.10	0	0.67	0	3.78	0	1.56	16.53
evm.model.scaffold_168.14	0.88	1.59	1.41	0.18	0.53	1.41	16.585
evm.model.scaffold_100.915	0.47	1.41	1.31	1.22	0.66	0.94	36.899
evm.model.scaffold_100.38	0.55	2.18	1.64	1.09	0	0.55	166.22
evm.model.scaffold_100.1009	0.83	1.66	1.66	0.21	0.41	1.24	13.211
evm.model.scaffold_100.1289	0.12	1.65	0.82	1.76	0.35	1.29	105.734
evm.model.scaffold_100.116	0.63	2.21	1.26	0.95	0	0.95	48.447
evm.model.scaffold_100.1161	0.63	0.63	1.89	0.32	1.26	1.26	158.003
evm.model.scaffold_100.1692	0.96	1.2	1.44	1.2	0.24	0.96	16.486
evm.model.scaffold_100.1335	0.69	1.2	1.37	0.86	0.51	1.37	35.007
evm.model.scaffold_100.331	0.21	1.5	1.29	2.14	0	0.86	107.066
evm.model.scaffold_100.1259	0.32	1.89	0.63	0.95	0.32	1.89	30.798
evm.model.scaffold_100.388	0.31	1.73	1.93	0.51	0.41	1.12	12.976
evm.model.scaffold_100.1154	0.55	1.45	1.82	1.09	0.18	0.91	173.686
evm.model.scaffold_100.1137	0.21	1.29	0.86	1.93	0.64	1.07	35.499
evm.model.scaffold_100.1263	0.2	2	0.6	1.4	0	1.8	49.099
evm.model.scaffold_100.97	0.58	1.55	1.94	0.77	0.58	0.58	26.295
evm.model.scaffold_100.742	1.08	1.84	1.46	0.41	0.5	0.7	16.172
evm.model.scaffold_100.98	0.67	2.17	0.83	1	0.83	0.5	31.961
evm.model.scaffold_100.660	0.23	2.54	1.15	1.38	0.23	0.46	11.999
evm.model.scaffold_100.99	0.73	1.76	1.32	1.02	0.73	0.44	19.024
evm.model.scaffold_100.697	0	2.5	2	0.5	0.5	0.5	380.173
evm.model.scaffold_100.1595	0.51	1.03	2.14	0.51	0.51	1.29	57.095
evm.model.scaffold_100.1710	0	2.25	1.13	1.13	0.38	1.13	18.929
evm.model.scaffold_100.1543	1.17	1.33	1.17	1	0.58	0.75	17.05
evm.model.scaffold_100.897	0	1.5	2.25	0.38	0.75	1.13	156.998
evm.model.scaffold_100.1625	0.79	1.5	1.66	0.71	0.39	0.95	114.871
evm.model.scaffold_100.397	0.54	1.74	1.5	0.66	0.54	1.02	13.6
evm.model.scaffold_100.848	0.7	1.22	1.83	1.04	0.43	0.78	44.545
evm.model.scaffold_100.142	1.29	2.36	0.86	0.43	0.21	0.86	184.416
evm.model.scaffold_100.745	1.09	2.18	1.64	0.27	0.27	0.55	15.188
evm.model.scaffold_100.785	0.63	2.84	0.95	1.58	0	0	57.413
evm.model.scaffold_100.1144	0.43	2.02	1.47	0.73	0.61	0.73	15.652
evm.model.scaffold_100.75	0.6	1.56	0.96	0.84	0.6	1.44	18.453
evm.model.scaffold_100.415	0.67	3.33	0.67	0	0.67	0.67	111.524
evm.model.scaffold_100.1438	0.59	1.32	1.76	0.73	0.73	0.88	16.531
evm.model.scaffold_100.205	0.61	1.22	1.84	0.49	0.73	1.1	49.914
evm.model.scaffold_100.656	1.05	1.2	0.75	0.9	1.05	1.05	34.862
evm.model.scaffold_100.1737	0.47	1.42	2.53	0.63	0.47	0.47	15.711
evm.model.scaffold_100.1400	0.93	1.55	1.45	0.62	0.62	0.83	14.339
evm.model.scaffold_100.439	0.58	0.58	1.55	0.77	0.97	1.55	39.826
evm.model.scaffold_100.643	0	1.71	1.29	2.14	0	0.86	73.395
evm.model.scaffold_100.1277	1	1.33	2	1.33	0	0.33	14.562
evm.model.scaffold_100.375	0.62	2.12	0.97	1.24	0.53	0.53	16.701
evm.model.scaffold_100.510	0.68	1.45	1.65	0.39	0.87	0.97	11.076
evm.model.scaffold_100.61	0.45	0.91	0.79	2.6	0.34	0.91	27.167
evm.model.scaffold_100.465	0.68	0.82	1.77	0.95	0.82	0.95	53.931
evm.model.scaffold_100.890	0.69	1.85	0.46	1.62	0.23	1.15	10.158
evm.model.scaffold_100.1251.1	0.36	2.55	0.91	0.73	0.73	0.73	22.806
evm.model.scaffold_100.971	0	2.18	1.91	0.55	0.82	0.55	23.239
evm.model.scaffold_100.143	0.75	1.75	1.5	0.75	0.75	0.5	140.829
evm.model.scaffold_100.1697	0.3	0.9	1.2	2.1	0.6	0.9	21.378
evm.model.scaffold_100.896	0.48	1.44	1.92	1.68	0.24	0.24	149.887
evm.model.scaffold_100.1439	0.46	1.15	1.38	1.38	1.15	0.46	46.279
evm.model.scaffold_100.1577	0.17	0.86	1.89	1.2	1.37	0.51	15.891
evm.model.scaffold_100.52	0.51	1.54	2.23	0.51	0.17	1.03	31.031
evm.model.scaffold_100.78	0	1.6	1.2	1.6	0	1.6	30.163
evm.model.scaffold_100.1262	0.55	1.09	1.64	2.18	0.55	0	12.032
evm.model.scaffold_100.1164	0.15	1.85	1.08	2.31	0.15	0.46	130.736
evm.model.scaffold_100.1084	0	1.64	1.64	1.64	0.55	0.55	27.543
evm.model.scaffold_100.1540	0	2.25	1.5	1.5	0	0.75	10.978
evm.model.scaffold_100.531	0.71	1.76	1.06	0	0.71	1.76	33.779
evm.model.scaffold_100.582	0.9	1.65	1.35	0.9	0.9	0.3	22.776
evm.model.scaffold_100.1513	1.64	0	2.18	0.55	1.09	0.55	37.991
evm.model.scaffold_100.1795	1.06	1.41	2.12	0.53	0.18	0.71	79.155
evm.model.scaffold_100.34	0	0	1.5	1.5	0	3	78.892
evm.model.scaffold_100.960	0.32	0.81	0.32	2.76	0.16	1.62	14.116
evm.model.scaffold_100.1010	1.43	1.17	1.43	0.52	0.65	0.78	10.376
evm.model.scaffold_100.1274	0.83	1.44	1.83	0.56	0.56	0.78	28.856
evm.model.scaffold_100.1906_evm.model.scaffold_100.1907	1.48	1.74	1.43	0.39	0.13	0.83	12.436
evm.model.scaffold_100.1821	1.46	1.46	1.62	0.32	0.65	0.49	41.098
evm.model.scaffold_100.36	0	0.86	0.64	3.43	0	1.07	84.423
evm.model.scaffold_100.1547.1	1	2.5	1.5	0.5	0	0.5	25.63
evm.model.scaffold_100.851.2	0.64	2.17	1.53	0.64	0.26	0.77	14.028
evm.model.scaffold_100.667	0.12	1.88	1.41	2.12	0.12	0.35	11.419
evm.model.scaffold_100.1079	0.4	1.6	1.2	0.93	0.67	1.2	17.708
evm.model.scaffold_100.1216	0.37	2.08	1.1	0.61	0.73	1.1	177.837
evm.model.scaffold_100.1581	0	0.55	1.91	2.45	0.55	0.55	13.516
evm.model.scaffold_100.1242	0.56	1.44	1.44	1.33	0.44	0.78	28.614
evm.model.scaffold_100.60	0.62	1.86	1.24	1.03	0.21	1.03	85.768
evm.model.scaffold_100.827	1.16	1.05	1.89	0.74	0.74	0.42	69.295
evm.model.scaffold_100.1020	0.48	1.8	2.04	0.24	0.6	0.84	14.844
evm.model.scaffold_100.858	0.6	1.2	1.2	0.6	2.4	0	20.775
evm.model.scaffold_100.474	0.67	1.33	1.33	1	1	0.67	26.236
evm.model.scaffold_100.507	0.85	1.21	1.88	0.67	0.61	0.79	52.569
evm.model.scaffold_100.280	0.93	1.82	1.14	0.55	0.72	0.85	12.11
evm.model.scaffold_100.900	0.88	1.41	1.59	0.88	0.71	0.53	40.909
evm.model.scaffold_100.1172	0	2	2.33	0.67	0	1	64.083
evm.model.scaffold_100.809	0.48	1.06	0.87	1.84	0.39	1.35	46.89
evm.model.scaffold_100.554	0.2	1.5	1.9	0.8	0.8	0.8	48.674
evm.model.scaffold_100.1508	0.32	1.46	0.97	0.97	0.32	1.95	136.567
evm.model.scaffold_100.690	0.22	1.11	0.89	3.11	0.22	0.44	55.159
evm.model.scaffold_100.1206	0.72	0.96	1.2	2.4	0.24	0.48	117.375
evm.model.scaffold_100.171	1	1	2	0	0.33	1.67	14.044
evm.model.scaffold_100.384	0.14	0.71	2.43	1	0.86	0.86	16.694
evm.model.scaffold_100.1359	0.35	2.47	1.41	0.35	0.35	1.06	14.604
evm.model.scaffold_100.389	0.32	1.89	1.89	1.58	0	0.32	11.002
evm.model.scaffold_100.1466	0.97	1.94	0.58	0.19	0.97	1.35	11.417
evm.model.scaffold_100.1695	0.91	1.96	1.43	0.13	0.78	0.78	55.242
evm.model.scaffold_100.941	0.71	1.41	1.76	0	0.71	1.41	50.986
evm.model.scaffold_100.125	0.88	1.59	0.53	1.41	0.53	1.06	64.006
evm.model.scaffold_100.15	0.43	1.71	1.5	0.64	0.43	1.29	112.974
evm.model.scaffold_100.348	0	2.73	1.09	2.18	0	0	57.06
evm.model.scaffold_100.173	0.35	0	1.76	0.71	0	3.18	15.926
evm.model.scaffold_100.1002	0	0	0	3.82	0	2.18	33.795
evm.model.scaffold_100.720	0.91	1.91	1.27	0.45	0.64	0.82	16.663
evm.model.scaffold_100.1333	0.48	1.44	0.72	0.24	1.68	1.44	38.199
evm.model.scaffold_100.367	0.8	1.33	0.8	1.6	0.27	1.2	30.241
evm.model.scaffold_100.420	0.51	1.63	1.02	1.02	0.41	1.42	39.581
evm.model.scaffold_100.1136	0.3	1.38	0.39	2.16	0.49	1.28	314.552
evm.model.scaffold_100.1384	0.75	3.75	0	1.5	0	0	630.558
evm.model.scaffold_100.292	1.5	1.5	1.5	0	0.38	1.13	44.301
evm.model.scaffold_100.1306	0	1	1.5	2	0.5	1	10.623
evm.model.scaffold_100.1247	1.06	2.82	1.06	0	0.71	0.35	12.893
evm.model.scaffold_100.300	0	0.86	1.29	2.14	0.43	1.29	15.769
evm.model.scaffold_100.569	0	0.92	1.15	2.31	0.23	1.38	22.003
evm.model.scaffold_100.702	0.26	1.83	0.78	0.78	1.57	0.78	93.265
evm.model.scaffold_100.1473	0.41	1.86	1.97	0.31	0.41	1.03	12.676
evm.model.scaffold_100.1672	0	2.14	0.86	2.14	0.43	0.43	128.719
evm.model.scaffold_100.1766	0.48	0.72	2.64	0.48	0.96	0.72	23.124
evm.model.scaffold_100.226	0.8	2.4	0.8	0.8	1.2	0	11.391
evm.model.scaffold_100.309	0	0.6	1.8	1.8	0.8	1	23.149
evm.model.scaffold_100.1098	1.23	1.64	1.77	0.55	0.27	0.55	13.041
evm.model.scaffold_100.73	1.09	1.36	1.36	0.27	0.82	1.09	18.556
evm.model.scaffold_100.714	0.44	1.56	0.89	0.89	0.44	1.78	161.585
evm.model.scaffold_100.114	0.43	1.29	0.86	1.07	0.86	1.5	40.566
evm.model.scaffold_100.10	0.3	1.2	0.3	2.4	1.5	0.3	26.979
evm.model.scaffold_100.505	0.35	0.71	1.06	1.06	1.76	1.06	68.871
evm.model.scaffold_100.838	0.38	1.5	0.94	2.06	0.56	0.56	224.636
evm.model.scaffold_100.1062	1	2	1	0.25	0.75	1	10.445
evm.model.scaffold_100.19	1.09	1.64	1.27	0.36	1.09	0.55	44.221
evm.model.scaffold_100.359	0.94	1.78	1.31	0.66	0.28	1.03	92.648
evm.model.scaffold_100.154	2.4	1.2	0	1.2	0	1.2	82.702
evm.model.scaffold_100.392	0.56	1.88	0.94	0.56	1.5	0.56	18.38
evm.model.scaffold_100.704.2	1	1.63	2	0	0.38	1	20.333
evm.model.scaffold_100.863	0.47	1.11	0.95	1.58	0.79	1.11	14.264
evm.model.scaffold_100.889	0.67	2.33	1	0	1	1	10.277
evm.model.scaffold_100.351	0.4	1.6	2	0.4	0.8	0.8	29.333
evm.model.scaffold_100.814	0.68	1.02	1.58	0.79	0.57	1.36	12.022
evm.model.scaffold_100.1360	1.03	1.2	1.71	0.86	0.34	0.86	56.157
evm.model.scaffold_100.1328	1.2	1.8	1.8	0.6	0	0.6	18.913
evm.model.scaffold_100.631	0.69	1.15	2.31	0.92	0.23	0.69	34.811
evm.model.scaffold_100.875_evm.model.scaffold_100.876	1.16	0.97	0.77	0.58	1.16	1.35	31.592
evm.model.scaffold_100.984	0.86	1.71	1.03	0.17	1.2	1.03	17.107
evm.model.scaffold_100.1904	0	1.33	1.33	0.67	0.67	2	14.126
evm.model.scaffold_100.1038	0.95	1.22	1.44	0.9	0.59	0.9	12.995
evm.model.scaffold_100.1011	0.71	2.12	1.41	1.06	0.35	0.35	12.651
evm.model.scaffold_100.442	0.69	0.69	1.62	1.62	0.92	0.46	19.73
evm.model.scaffold_100.1516	0.21	2.04	1.71	0.64	0.75	0.64	20.988
evm.model.scaffold_100.802	0.5	1.5	1	2	0.5	0.5	138.441
evm.model.scaffold_100.1514	1	1.17	1.83	0.33	1	0.67	12.563
evm.model.scaffold_100.482	0.46	0.92	0.46	2.77	0.46	0.92	134.954
evm.model.scaffold_100.856	0.38	1.5	0.75	2.25	0	1.13	87.057
evm.model.scaffold_100.1023	1.19	1.5	1.94	0.31	0.44	0.63	63.471
evm.model.scaffold_100.1339	1.6	1.6	1.6	0	0.8	0.4	70.878
evm.model.scaffold_100.1013	0.75	0.75	1.75	1	0.5	1.25	13.907
evm.model.scaffold_100.119	1.11	0.67	1.78	0.89	0.89	0.67	26.942
evm.model.scaffold_100.1015.1	0.57	2.29	1.24	0.67	0.38	0.86	40.136
evm.model.scaffold_100.176	0.5	0.63	1.38	1.5	0.5	1.5	14.772
evm.model.scaffold_100.1321	0.33	2.5	0.5	1.67	0	1	30.571
evm.model.scaffold_100.323	0.55	0.55	0.55	3.82	0.55	0	213.225
evm.model.scaffold_100.1683	0.78	2.09	1.3	0.78	0.52	0.52	22.923
evm.model.scaffold_100.881.1	1.29	2.14	1.29	0.86	0	0.43	22.759
evm.model.scaffold_100.1394	0.19	1.45	1.06	2.23	0.29	0.77	24.209
evm.model.scaffold_100.49	0.65	1.42	1.68	0.97	0.52	0.77	31.217
evm.model.scaffold_100.1805	0.34	1.36	1.7	1.02	0.27	1.3	23.64
evm.model.scaffold_100.1586	1.25	1.25	0.75	0.75	0.75	1.25	17.948
evm.model.scaffold_100.1752	2	1	2	0	0	1	22.179
evm.model.scaffold_100.1856	0	1.5	3	0	0	1.5	16.845
evm.model.scaffold_100.1753	0.52	1.3	1.57	1.04	0.78	0.78	16.098
evm.model.scaffold_100.1393	0.44	1.56	1.56	0.89	0.33	1.22	23.241
evm.model.scaffold_100.1313	0.88	3	0.53	0.88	0.18	0.53	23.788
evm.model.scaffold_100.1454	1.33	1.33	1.33	0.67	0	1.33	27.356
evm.model.scaffold_100.1548	0.8	1.6	1.6	0	1.6	0.4	73.902
evm.model.scaffold_100.51	0	0.92	2.31	0.46	1.38	0.92	21.89
evm.model.scaffold_100.1414	0.5	1.5	1.5	0.5	1	1	14.894
evm.model.scaffold_100.1046	0.71	1.71	0.86	0.57	0.71	1.43	109.267
evm.model.scaffold_100.1058	0.67	1.62	1.24	1.05	0.95	0.48	11.262
evm.model.scaffold_100.990	0	2	1.2	1.2	0.4	1.2	149.785
evm.model.scaffold_100.57	0.73	1.54	1.86	0.49	0.57	0.81	42.942
evm.model.scaffold_100.1191	0.89	0.89	1.79	1.02	0.26	1.15	12.568
evm.model.scaffold_100.1044	1.2	2.4	0	1.2	1.2	0	71.688
evm.model.scaffold_100.1171	0.88	1.9	2.05	0.44	0.15	0.59	35.281
evm.model.scaffold_100.187	0	0.81	0.35	4.27	0.12	0.46	11.898
evm.model.scaffold_100.158	0.4	0.4	1.2	3.2	0	0.8	27.777
evm.model.scaffold_100.1397	0.29	2	1.9	0.95	0.38	0.48	12.112
evm.model.scaffold_100.312	0.88	0.44	2.93	0.44	0.59	0.73	28.501
evm.model.scaffold_100.1238	0.6	1.05	1.05	1.65	0.3	1.35	12.576
evm.model.scaffold_100.1118	0	1.8	1.2	1.2	0	1.8	86.929
evm.model.scaffold_100.1776	0.45	2.04	1.13	0.91	0.34	1.13	19.023
evm.model.scaffold_100.945	0	1.13	1.13	1.5	0.38	1.88	16.102
evm.model.scaffold_100.1847	0.62	1.45	1.03	0.62	1.24	1.03	34.068
evm.model.scaffold_100.356	1.01	1.52	1.61	0.76	0.68	0.42	27.007
evm.model.scaffold_100.1813	1.24	1.36	1.79	0.56	0.49	0.56	22.115
evm.model.scaffold_100.218	0.21	1.71	1.07	2.57	0.21	0.21	105.973
evm.model.scaffold_100.1347	0	1.2	1.8	1.2	0.6	1.2	23.891
evm.model.scaffold_100.683	0.9	1.8	1.2	0.75	0.45	0.9	89.724
evm.model.scaffold_100.227	0	0.67	0.67	2.67	1.33	0.67	10.685
evm.model.scaffold_100.361	0.43	1.07	0.86	1.71	0.86	1.07	64.702
evm.model.scaffold_100.434	0.8	0.93	1.33	1.6	0.53	0.8	40.375
evm.model.scaffold_100.104	0.71	0	1.76	0.71	1.41	1.41	12.097
evm.model.scaffold_100.1485	0.86	0	1.71	2.57	0	0.86	149.674
evm.model.scaffold_100.475	0.43	0.86	1.29	1.29	0.86	1.29	310.569
evm.model.scaffold_100.535	1.09	1.36	1.36	0.82	0.27	1.09	13.994
evm.model.scaffold_100.318	0.71	2.12	1.24	0.88	0.53	0.53	19.976
evm.model.scaffold_100.1674	1.07	1.07	1.6	0.53	1.2	0.53	22.522
evm.model.scaffold_100.186	0.17	0.83	1	2	0.83	1.17	31.763
evm.model.scaffold_100.1188	0.51	1.71	1.2	1.37	0.43	0.77	22.727
evm.model.scaffold_100.1149	0.29	1.02	1.61	0.88	0.73	1.46	35.91
evm.model.scaffold_100.942.1	1.11	1.53	1.42	0.58	0.47	0.89	16.328
evm.model.scaffold_100.1227	0	4.36	0	0.55	0.55	0.55	14.417
evm.model.scaffold_100.283	0.9	2.1	0.3	1.2	0	1.5	602.227
evm.model.scaffold_100.1181	0.38	1.79	1.66	0.26	0.89	1.02	20.24
evm.model.scaffold_100.306	1.32	1.12	1.73	0.41	0.41	1.02	45.951
evm.model.scaffold_100.609	0.86	0	3.43	0	0	1.71	18.188
evm.model.scaffold_100.956	0.39	1.55	1.74	1.16	0.58	0.58	13.452
evm.model.scaffold_100.1861	1.33	1.33	1.67	0	0	1.67	16.69
evm.model.scaffold_100.166	0.75	1.69	0.94	0.19	0.94	1.5	14.348
evm.model.scaffold_100.1150.5	0.38	2.06	1.5	0.94	0.38	0.75	106.173
evm.model.scaffold_100.1452	0.6	0.9	1.5	0.9	1.2	0.9	24.758
evm.model.scaffold_100.709	0.34	1.54	1.54	1.03	0.34	1.2	12.625
evm.model.scaffold_100.778	1.04	1.04	2.09	0.26	0.78	0.78	28.429
evm.model.scaffold_100.489	0.8	1.8	1.6	0.6	0.6	0.6	39.662
evm.model.scaffold_100.248.1	0.53	1.58	1.58	1.05	0.74	0.53	24.769
evm.model.scaffold_100.800	0.52	1.04	2.35	0.52	0.78	0.78	15.671
evm.model.scaffold_100.1106	0.26	1.3	1.83	1.3	0.52	0.78	49.43
evm.model.scaffold_100.1241	0	1.85	0.92	1.85	0.46	0.92	128.793
evm.model.scaffold_100.986	1.22	1.31	1.88	0.47	0.66	0.47	31.42
evm.model.scaffold_100.103	0.75	1.25	2	1	0.5	0.5	14.561
evm.model.scaffold_100.644	0	0	1.29	3	0.43	1.29	124.648
evm.model.scaffold_100.1162	0.6	2.4	1.8	0	0.6	0.6	68.374
evm.model.scaffold_100.373	0.55	0.55	3.27	1.09	0	0.55	295.1
evm.model.scaffold_100.910	1.3	2.09	1.3	0	0.52	0.78	29.083
evm.model.scaffold_100.862	0.44	1.6	1.87	1.1	0.5	0.5	25.227
evm.model.scaffold_100.830	1.31	1.31	1.31	0.38	1.31	0.38	16.622
evm.model.scaffold_100.1103	0.31	1.85	1.23	1.38	0.31	0.92	31.798
evm.model.scaffold_100.381	0.3	0.6	1.8	2.4	0.6	0.3	28.512
evm.model.scaffold_100.1903	0.55	3.27	0.55	0.55	0.55	0.55	10.889
evm.model.scaffold_100.537.1	0	2.63	0.38	1.88	0.75	0.38	534.717
evm.model.scaffold_100.591	2	0	2	0	2	0	13.319
evm.model.scaffold_100.374	0.33	1.17	2.83	0.67	0	1	25.839
evm.model.scaffold_100.253	0.62	1.24	1.66	1.03	0.83	0.62	35.681
evm.model.scaffold_100.1184	1.08	1.21	1.89	0.54	0.54	0.74	12.632
evm.model.scaffold_100.952	0	2.67	1	1	0	1.33	84.336
evm.model.scaffold_100.1349	0.5	1.63	1.63	0.5	0.38	1.38	53.865
evm.model.scaffold_100.452	0.6	1.4	1.4	2	0.4	0.2	24.531
evm.model.scaffold_100.1377	0.57	1.29	1.57	1	0.71	0.86	25.166
evm.model.scaffold_100.773.1	0.63	2.21	0.63	1.58	0	0.95	103.401
evm.model.scaffold_100.1087	0.77	1.11	1.37	1.63	0.34	0.77	260.474
evm.model.scaffold_100.653.1	0.29	0.86	1.14	1.71	0.86	1.14	46.989
evm.model.scaffold_100.687.2	1	1.42	1.67	0.58	0.42	0.92	27.993
evm.model.scaffold_100.1027	0.69	1.24	2.41	0.69	0.14	0.83	35.172
evm.model.scaffold_100.185	0.5	3	1.17	0.17	0.17	1	11.096
evm.model.scaffold_100.1408	0	1.06	0.35	2.47	0.71	1.41	15.941
evm.model.scaffold_100.981	1.89	0.32	1.58	1.89	0	0.32	11.899
evm.model.scaffold_100.1318.1	1.71	0.86	1.54	0.34	0.17	1.37	18.232
evm.model.scaffold_100.460	0.51	1.37	1.54	1.37	0.51	0.69	10.041
evm.model.scaffold_100.350	0.67	1.89	1.67	0.33	0.78	0.67	19.219
evm.model.scaffold_100.1854	0.39	0.77	1.55	2.32	0.19	0.77	28.655
evm.model.scaffold_100.481	0.44	1.94	0.97	1.24	0.53	0.88	19.321
evm.model.scaffold_100.1503	0.44	1.33	1.56	1.11	0.67	0.89	72.09
evm.model.scaffold_100.1720	0.76	1.81	1.38	0.67	0.43	0.95	10.815
evm.model.scaffold_100.353	0.2	1.18	1.48	1.77	0.59	0.79	35.083
evm.model.scaffold_100.1148	0.64	1.55	1.34	0.99	0.92	0.56	15.005
evm.model.scaffold_100.17	1	0.5	0	2	1	1.5	115.878
evm.model.scaffold_100.1116	0.2	2.2	1.8	0.8	0.4	0.6	26.241
evm.model.scaffold_100.651	0	1.5	2	2.5	0	0	27.403
evm.model.scaffold_100.1030	0.56	1.13	1.69	1.88	0.56	0.19	10.399
evm.model.scaffold_100.299	0.16	1.58	1.11	1.58	0.47	1.11	62.596
evm.model.scaffold_100.1240	0.55	0.68	1.23	1.77	0.55	1.23	77.406
evm.model.scaffold_100.650	0.93	2	1.07	0.4	0.27	1.33	10.231
evm.model.scaffold_100.487	0	4.67	0.67	0	0	0.67	18.71
evm.model.scaffold_100.1111	0.33	0.83	1	1.83	0.67	1.33	240.232
evm.model.scaffold_100.1440	0.97	0.97	1.35	0.97	0.58	1.16	37.882
evm.model.scaffold_100.891	0	2	2	1	0	1	361.589
evm.model.scaffold_100.540	0	0.86	2.14	0.43	1.29	1.29	94.978
evm.model.scaffold_100.932.2	0.97	1.62	1.62	0.42	0.51	0.88	40.624
evm.model.scaffold_100.884	0.75	1.5	2.25	0	0	1.5	106.548
evm.model.scaffold_100.1537	0	2	2	1	0	1	49.033
evm.model.scaffold_100.905	0.77	1.67	1.58	0.59	0.59	0.81	16.543
evm.model.scaffold_100.1597	0.41	1.86	0.52	1.97	0.41	0.83	15.001
evm.model.scaffold_100.1905	1.08	2.31	1.23	0.31	0.31	0.77	10.274
evm.model.scaffold_100.921	0.4	0.91	2	1.14	0.63	0.91	53.864
evm.model.scaffold_100.456	0.75	1.13	3	0.75	0	0.38	14.853
evm.model.scaffold_100.330	0	1.09	3.27	0.55	0.55	0.55	215.905
evm.model.scaffold_100.934	1	1	2.2	0.4	0.6	0.8	18.158
evm.model.scaffold_100.1787	0.17	0.83	2	1.33	0.5	1.17	26.715
evm.model.scaffold_100.357	0.46	2.77	0.92	1.38	0	0.46	103.29
evm.model.scaffold_100.1288	0.56	0.75	1.22	2.25	0.19	1.03	38.706
evm.model.scaffold_100.206	1.2	1.2	0.8	1.2	0.4	1.2	57.006
evm.model.scaffold_100.563	0.29	2.57	0.57	0.57	0.57	1.43	270.379
evm.model.scaffold_100.846	0.43	1.57	1.65	0.78	0.7	0.87	14.912
evm.model.scaffold_100.1573	0.46	2.77	1.15	0.23	0.23	1.15	56.494
evm.model.scaffold_100.695	1.14	2.57	1.14	0.57	0	0.57	50.304
evm.model.scaffold_100.287	0.95	2.21	1.26	0.95	0	0.63	114.46
evm.model.scaffold_100.498	0	0	1.2	2.4	0	2.4	12.161
evm.model.scaffold_100.1699	0	1.36	1.64	1.09	0.82	1.09	10.057
evm.model.scaffold_100.719	0	4.5	1.5	0	0	0	119.181
evm.model.scaffold_100.335	0.27	0.27	0.82	3.27	0.27	1.09	24.376
evm.model.scaffold_100.917	2.77	0	0.92	1.38	0	0.92	88.845
evm.model.scaffold_100.1879	0.24	2	2	1.18	0.24	0.35	49.088
evm.model.scaffold_100.383	0.65	1.14	1.95	0.65	0.97	0.65	20.223
evm.model.scaffold_100.1082	0.81	1.42	1.32	0.81	0.81	0.81	17.493
evm.model.scaffold_100.1389	0.62	1.66	1.24	1.24	0.83	0.41	43.88
evm.model.scaffold_100.320	0.62	1.24	1.45	0.21	0.83	1.66	12.712
evm.model.scaffold_100.857	0.6	1.8	0.6	1.65	1.35	0	19.829
evm.model.scaffold_100.506	0.38	1.13	2.25	1.13	0.75	0.38	35.386
evm.model.scaffold_100.140	0.6	1.8	2.4	0	0.6	0.6	12.547
evm.model.scaffold_100.1063	1.06	0.88	2.47	0.88	0.18	0.53	12.221
evm.model.scaffold_100.399	1.26	1.58	0.95	0	0.63	1.58	15.896
evm.model.scaffold_100.493	0.75	2.06	1.5	0.56	0.38	0.75	28.449
evm.model.scaffold_100.1395	2.14	1.29	1.07	0.21	0.21	1.07	17.325
evm.model.scaffold_100.149	0.76	1.53	1.31	0.55	1.2	0.65	21.343
evm.model.scaffold_100.1671	0.19	1.74	1.16	0.39	0.77	1.74	215.952
evm.model.scaffold_100.520	1.74	1.16	0.39	1.35	0.58	0.77	12.328
evm.model.scaffold_100.1351	1.3	1.3	1.57	1.04	0.52	0.26	20.215
evm.model.scaffold_100.394	1	1.5	1.25	0.75	0.25	1.25	11.47
evm.model.scaffold_100.718	0	1.2	0.6	4.2	0	0	19.028
evm.model.scaffold_100.1654.1	1.45	1.24	1.24	1.24	0	0.83	29.452
evm.model.scaffold_100.908	0.56	1.22	2.25	0.56	0.47	0.94	25.985
evm.model.scaffold_100.532	0.3	0.6	2.7	0.3	0.6	1.5	15.017
evm.model.scaffold_100.1667	0.57	1.62	2.48	0.29	0.29	0.76	11.398
evm.model.scaffold_100.1744	0.24	0	1.2	2.88	0.96	0.72	18.41
evm.model.scaffold_100.499_evm.model.scaffold_100.500	0.72	2.15	1.34	0.72	0.54	0.54	10.402
evm.model.scaffold_100.556	0.4	1.5	0.8	2.3	0.2	0.8	24.984
evm.model.scaffold_100.54	0.58	0.97	1.16	1.16	0.58	1.55	23.381
evm.model.scaffold_100.686	1.03	1.45	0.83	0.41	1.24	1.03	21.764
evm.model.scaffold_100.1228	0.19	1.16	1.74	1.94	0.58	0.39	16.44
evm.model.scaffold_100.904	0.29	1.14	1.43	1.43	0.29	1.43	19.108
evm.model.scaffold_100.794.1	0.73	1.1	1.22	1.47	0.86	0.61	11.847
evm.model.scaffold_100.635	0.57	2	0.43	2.29	0.29	0.43	344.442
evm.model.scaffold_100.1745	0.67	2.13	1.07	0.4	0.27	1.47	39.109
evm.model.scaffold_100.1539	0.57	1.43	2	0	0.29	1.71	24.652
evm.model.scaffold_100.1499	0.57	1.86	2.14	0.43	0.29	0.71	11.743
evm.model.scaffold_100.1556	0	0.62	1.86	1.66	0.41	1.45	225.728
evm.model.scaffold_100.137	0.66	1.42	1.65	1.28	0.38	0.61	10.919
evm.model.scaffold_100.50	0.43	1.71	1.29	0.86	0.43	1.29	67.577
evm.model.scaffold_100.791.1	0.26	1.04	1.57	2.09	0.13	0.91	18.218
evm.model.scaffold_100.56.1	0.65	2.4	1.42	0.65	0.33	0.55	235.564
evm.model.scaffold_100.744	0.3	2.1	1.2	1.35	0.3	0.75	10.723
evm.model.scaffold_100.1474	0.4	2	0.8	0.8	1.2	0.8	20.923
evm.model.scaffold_100.1658	0	1.36	1.09	1.64	0.55	1.36	41.713
evm.model.scaffold_100.40	0.46	0.46	2.77	1.38	0	0.92	122.99
evm.model.scaffold_100.701	0.69	2.31	1.15	0.46	0.23	1.15	13.454
evm.model.scaffold_100.337	0.18	1.91	1.45	2.18	0	0.27	77.643
evm.model.scaffold_100.922	0	1.89	1.71	1.2	0	1.2	157.046
evm.model.scaffold_100.637	0.89	1.33	1.11	1.11	0.67	0.89	60.018
evm.model.scaffold_100.473	0	2.14	0.43	0.86	0.43	2.14	12.297
evm.model.scaffold_100.285	0	0.8	2	2	0	1.2	98.706
evm.model.scaffold_100.1765	1.29	1.71	1.5	0.43	0.43	0.64	20.227
evm.model.scaffold_100.833	0.82	0.59	2.24	0.94	0.71	0.71	19.454
evm.model.scaffold_100.414.1	0.89	1.11	1.33	0.89	0.67	1.11	33.74
evm.model.scaffold_100.1696	0	1.41	1.41	0.71	0.35	2.12	28.401
evm.model.scaffold_100.138	0.63	0.95	0.95	1.26	0.32	1.89	14.972
evm.model.scaffold_100.1421	0.49	2.22	1.32	0.49	0.49	0.99	49.572
evm.model.scaffold_100.1455	0	0	3.6	0	0	2.4	43.92
evm.model.scaffold_100.574	0.94	1.5	1.59	0.38	0.38	1.22	57.157
evm.model.scaffold_100.1153	0.61	1.83	1.89	0.67	0.44	0.56	13.098
evm.model.scaffold_100.1536	0.47	1.89	1.42	0.95	0.63	0.63	14.238
evm.model.scaffold_100.741	0.25	2.5	1.25	1	0.25	0.75	12.378
evm.model.scaffold_100.828	0.55	1.64	2.18	0.55	0	1.09	199.976
evm.model.scaffold_100.127	0.93	1.66	0.93	0.83	0.52	1.14	35.665
evm.model.scaffold_100.1160	0.92	1.85	1.38	0.92	0	0.92	81.843
evm.model.scaffold_100.1434	0.55	1.09	2.18	0	0.55	1.64	134.393
evm.model.scaffold_100.1135	0.46	1.38	2.31	0.92	0	0.92	28.734
evm.model.scaffold_100.1305.4	0.62	1.69	1.69	1.23	0.31	0.46	12.489
evm.model.scaffold_100.1638.2	0.82	1.58	1.27	0.45	0.82	1.05	23.781
evm.model.scaffold_100.871	0.36	1.27	0.55	2	0.55	1.27	44.885
evm.model.scaffold_100.290.1	0.95	2.21	1.47	0.42	0.42	0.53	49.806
evm.model.scaffold_100.652.1	0.35	1.76	0.71	1.06	0.71	1.41	23.131
evm.model.scaffold_100.345	0.55	1.64	2.18	0.55	0	1.09	21.871
evm.model.scaffold_100.1490	0.22	1.75	2.07	0.65	0.87	0.44	47.829
evm.model.scaffold_100.1619	0.67	2.67	0.67	0	0.67	1.33	10.464
evm.model.scaffold_100.217	1	1.5	1.5	0.75	0.75	0.5	51.201
evm.model.scaffold_100.1700	0	0.6	1.2	2.4	1.8	0	16.277
evm.model.scaffold_100.1253.2	1.35	1.15	1.55	0.35	0.65	0.95	19.459
evm.model.scaffold_100.413	0.55	1.64	1.36	0.82	0.55	1.09	41.219
evm.model.scaffold_100.182	0.57	2	0.86	0.86	0.86	0.86	25.417
evm.model.scaffold_100.708	0.19	2.44	0.75	1.5	0.56	0.56	12.236
evm.model.scaffold_100.1374	0.86	1.71	0.86	1.71	0.21	0.64	45.119
evm.model.scaffold_100.909	0.4	1.6	1.2	2	0	0.8	90.164
evm.model.scaffold_100.750	0.44	1.59	1.85	0.62	0.53	0.97	30.244
evm.model.scaffold_100.1316	0.77	1.85	1.08	0.31	0.31	1.69	52.699
evm.model.scaffold_100.1550	0	1.64	0.55	2.18	0	1.64	41.624
evm.model.scaffold_100.445	0	2.05	1.9	1.32	0	0.73	16.973
evm.model.scaffold_100.462.1	0.59	1.17	1.46	1.17	0.73	0.88	28.308
evm.model.scaffold_100.45	0.35	1.06	0.71	3.53	0	0.35	77.104
evm.model.scaffold_100.872	1	1.75	0.75	0.75	0	1.75	31.317
evm.model.scaffold_100.1223_evm.model.scaffold_100.1224	0.6	1.2	1.6	1.6	0.6	0.4	20.426
evm.model.scaffold_100.24	0.69	1.32	1.89	0.6	0.53	0.97	12.306
evm.model.scaffold_100.1749	1.55	1.16	1.16	0.77	0.58	0.77	12.887
evm.model.scaffold_100.1083	0.44	2	0.89	1.33	0.89	0.44	16.583
evm.model.scaffold_100.18	0.44	0.89	1.56	2	0.44	0.67	12.732
evm.model.scaffold_100.579	0.38	0.75	1.88	0.75	0.38	1.88	270.954
evm.model.scaffold_100.1146	0.73	1.18	2.09	0.64	0.73	0.64	24.729
evm.model.scaffold_100.344	0.25	1.5	0.5	2	0.25	1.5	45.523
evm.model.scaffold_100.221	0	1.71	1.29	0.43	0	2.57	14.786
evm.model.scaffold_100.1245	0.67	2.33	0.67	1.33	0.33	0.67	29.179
evm.model.scaffold_100.777	1.5	0.25	0.75	1	1	1.5	30.314
evm.model.scaffold_100.799	0.25	2.5	1.5	0.75	0.25	0.75	81.801
evm.model.scaffold_100.1412	1.5	1.5	0.75	0.75	0.75	0.75	12.472
evm.model.scaffold_100.1726	0.78	1.08	1.32	0.78	0.84	1.2	22.618
evm.model.scaffold_100.530	0	1.67	1	1.33	0	2	38.862
evm.model.scaffold_100.911	1	1	2.5	1	0	0.5	18.337
evm.model.scaffold_100.1024	0.84	1.58	1.05	0.84	0.63	1.05	61.419
evm.model.scaffold_100.1402	0	1.04	1.3	2.35	0.26	1.04	237.499
evm.model.scaffold_100.150	0.75	0.75	2.25	1.5	0	0.75	161.702
evm.model.scaffold_100.369	0.64	1.53	1.4	0.64	0.89	0.89	14.77
evm.model.scaffold_100.293	0.59	2	1.06	1.06	0.47	0.82	77.48
evm.model.scaffold_100.480	0.6	0.96	1.44	2.04	0.36	0.6	33.33
evm.model.scaffold_100.1298.1	0.18	0.53	0.71	3	0.18	1.41	77.02
evm.model.scaffold_100.770	0.5	1.5	1	1.5	0.5	1	77.733
evm.model.scaffold_100.72	0	0.75	0	0.75	0	4.5	2850.16
evm.model.scaffold_100.1453	0.95	1.26	1.26	0.32	1.26	0.95	16.177
evm.model.scaffold_100.222	0.2	1.32	1.73	1.02	0.31	1.42	45.439
evm.model.scaffold_100.739	0.8	1.2	0.4	0.8	0	2.8	45.108
evm.model.scaffold_100.1086	0.82	1.64	1.36	1.36	0	0.82	30.495
evm.model.scaffold_100.175	0.36	2	1.73	0.27	0.45	1.18	15.604
evm.model.scaffold_100.71	0.64	1.29	1.5	1.18	0.32	1.07	16.835
evm.model.scaffold_100.260.1	0.73	1.32	0.73	0.59	1.17	1.46	20.649
evm.model.scaffold_100.1080	0.86	1.4	1.99	0.49	0.57	0.69	20.244
evm.model.scaffold_100.1276	0	1.36	3	0.55	0.27	0.82	11.161
evm.model.scaffold_100.1025	0.36	1.45	2.36	0.36	0.55	0.91	19.046
evm.model.scaffold_100.1538	0.91	2.18	0.55	0.36	0.55	1.45	36.744
evm.model.scaffold_100.65	0.5	1	1.5	2	0	1	194.269
evm.model.scaffold_100.886	0.46	1.62	1.62	0.69	0.69	0.92	77.411
evm.model.scaffold_100.504	0.82	0.55	1.91	1.09	1.09	0.55	10.379
evm.model.scaffold_100.466	0.51	0.89	1.53	1.28	1.15	0.64	19.233
evm.model.scaffold_100.497	1.26	1.89	0.63	0.63	0.63	0.95	13.717
evm.model.scaffold_100.958	0.49	1.62	0.97	1.95	0	0.97	40.46
evm.model.scaffold_100.400	0.51	1.77	1.52	0.76	0.57	0.88	130.561
evm.model.scaffold_100.524	0.65	1.95	1.62	0.81	0.65	0.32	168.836
evm.model.scaffold_100.1280	1	1.63	1.75	0.75	0.5	0.38	10.157
evm.model.scaffold_100.649	1	1.82	1.64	0.64	0.36	0.55	15.618
evm.model.scaffold_100.449	0.52	0.7	2.52	1.04	0.35	0.87	11.779
evm.model.scaffold_100.551.1	0	1.71	0.86	2.57	0.86	0	61.354
evm.model.scaffold_100.1495	0.36	2	1.64	0.55	0.18	1.27	22.89
evm.model.scaffold_100.688	0.73	0.91	1.27	0.55	0.36	2.18	22.012
evm.model.scaffold_100.578.1	0.84	1.67	1.12	0.7	0.84	0.84	31.265
evm.model.scaffold_100.782	0.4	2.2	1	1.2	0.2	1	91.758
evm.model.scaffold_100.1629	0.6	1.35	1.65	0.75	0.15	1.5	251.461
evm.model.scaffold_100.126	0.83	0.83	1.24	1.03	0.83	1.24	55.959
evm.model.scaffold_100.403	0	1.5	1	2	0	1.5	181.237
evm.model.scaffold_100.1497	0	1.59	1.41	0.88	0.18	1.94	164.859
evm.model.scaffold_100.1819	0.6	1.2	0.3	2.4	0.6	0.9	29.393
evm.model.scaffold_100.1250	0.4	1.47	0.93	2.8	0	0.4	108.012
evm.model.scaffold_100.829	0	1.58	0.63	1.26	0.95	1.58	36.995
evm.model.scaffold_100.1124.3	0.28	1.12	1.53	1.12	0.56	1.4	51.577
evm.model.scaffold_100.66	0.86	1.52	1.71	0.48	0.86	0.57	11.083
evm.model.scaffold_100.1194	0	0	0	2.25	0.75	3	150.766
evm.model.scaffold_100.207	0.77	1.08	2	0.77	0.77	0.62	21.772
evm.model.scaffold_100.1035	0.22	1.78	0.67	1.33	0.67	1.33	16.817
evm.model.scaffold_100.1147	0.86	1.93	1.43	0.36	0.57	0.86	20.407
evm.model.scaffold_100.878	0.75	1.5	1.88	0.75	0.38	0.75	15.42
evm.model.scaffold_100.1045	0.71	1.43	1	0.43	0.57	1.86	218.415
evm.model.scaffold_100.322	0.23	1.15	1.85	0.92	0.92	0.92	20.738
evm.model.scaffold_100.1835	0.67	2	0	2.67	0	0.67	14.988
evm.model.scaffold_100.924	0.5	0	4	1.5	0	0	14.675
evm.model.scaffold_100.588	0.95	1.73	1.55	0.39	0.47	0.91	26.159
evm.model.scaffold_100.33	0	0.46	1.38	4.15	0	0	182.765
evm.model.scaffold_100.538	0.46	1.56	1.15	1.33	0.81	0.69	43.966
evm.model.scaffold_100.1771	0.76	0.87	0.65	2.07	0.87	0.76	17.658
evm.model.scaffold_100.691.1	0.77	1.4	1.4	0.64	0.64	1.15	24.675
evm.model.scaffold_100.82	0.3	1.79	1.15	0.72	0.94	1.11	15.532
evm.model.scaffold_100.557	0.8	1.5	1.3	1.6	0.2	0.6	15.378
evm.model.scaffold_100.1007	0	0.82	1.64	1.36	0.27	1.91	14.404
evm.model.scaffold_100.1105	1	1.67	1.5	0.17	0.5	1.17	127.854
evm.model.scaffold_100.1862	0.92	0.23	1.15	3	0.23	0.46	17.228
evm.model.scaffold_100.332	0.12	1.22	1.22	1.96	0	1.47	19.775
evm.model.scaffold_100.363	0.88	1.76	1.76	0.18	0.88	0.53	110.57
evm.model.scaffold_100.1747	0.69	0.92	0.46	1.85	0.46	1.62	168.202
evm.model.scaffold_100.1504	0.71	2.12	1.06	0.35	0.71	1.06	26.27
evm.model.scaffold_100.868	0.6	1.8	1.92	0.84	0.36	0.48	20.958
evm.model.scaffold_100.1282	0.32	1.37	1.26	1.58	0.74	0.74	15.045
evm.model.scaffold_100.281	0	1.71	0.86	1.71	0.86	0.86	173.734
evm.model.scaffold_100.1493	0.55	0.55	1.09	2.18	0.55	1.09	10.873
evm.model.scaffold_100.547	0.48	2.4	1.44	0.96	0	0.72	114.314
evm.model.scaffold_100.1778	0.63	1.38	1.5	0.75	0.5	1.25	17.113
evm.model.scaffold_100.573	1.44	0.96	1.44	0.96	0.48	0.72	152.336
evm.model.scaffold_100.220	0.95	1.42	1.26	0.79	0.47	1.11	33.659
evm.model.scaffold_100.402	0.72	1.2	0.96	1.2	0.48	1.44	11.611
evm.model.scaffold_100.1209	0.5	2	1	1.5	0.5	0.5	13.955
evm.model.scaffold_100.1743	0.24	0.86	0.49	3.06	0.49	0.86	35.305
evm.model.scaffold_100.55	0.93	1.86	1.28	0.58	0.47	0.87	29.214
evm.model.scaffold_100.1790	0.49	1.38	1.48	0.59	0.59	1.48	10.695
evm.model.scaffold_100.1334	1.06	0.71	2.12	0	0.71	1.41	31.665
evm.model.scaffold_100.1827	0.48	1.68	0.72	0.96	0.72	1.44	17.887
evm.model.scaffold_100.393	0.86	1.29	1.29	0.86	0.86	0.86	12.817
evm.model.scaffold_100.885	1.2	1.8	0.8	1	0.8	0.4	12.723
evm.model.scaffold_100.1090	0.8	0.4	1.6	2.4	0	0.8	11.386
evm.model.scaffold_100.191	0.31	2.15	0.62	0.92	1.08	0.92	12.12
evm.model.scaffold_100.279	0.44	1.33	2	1.56	0.22	0.44	42.634
evm.model.scaffold_100.784	0.87	1.58	1.11	0.87	0.47	1.11	34.443
evm.model.scaffold_100.1342	1	1.5	0	1.5	0.5	1.5	74.093
evm.model.scaffold_100.1293	0.14	1.95	1.81	0.42	0.7	0.98	25.577
evm.model.scaffold_100.180	0	1.06	1.76	2.47	0.35	0.35	277.65
evm.model.scaffold_100.145	0.4	1.6	2	0.8	0.8	0.4	18.877
evm.model.scaffold_100.1640	0.19	1.65	0.68	1.65	0.48	1.35	185.709
evm.model.scaffold_100.263_evm.model.scaffold_100.264	0.92	1.27	1.94	0.49	0.6	0.78	20.618
evm.model.scaffold_100.978	0.64	1.07	2.57	0.86	0.64	0.21	31.564
evm.model.scaffold_100.608	0.75	1.25	1.25	1	0.5	1.25	37.513
evm.model.scaffold_100.972	0.6	1.2	2.4	1.2	0.6	0	14.448
evm.model.scaffold_100.1358	0.8	1.6	1.2	1.2	0.8	0.4	13.173
evm.model.scaffold_100.408.2	0.69	1.03	1.89	1.03	0.51	0.86	16.979
evm.model.scaffold_100.642	0.15	1.35	0.6	3.3	0.45	0.15	48.585
evm.model.scaffold_100.155	0.21	0.62	1.24	2.48	0.83	0.62	81.14
evm.model.scaffold_100.888	0	0.92	1.38	0.46	1.38	1.85	12.256
evm.model.scaffold_100.1728	0.5	2	2	0.5	0.5	0.5	15.924
evm.model.scaffold_100.853	1.18	1.06	2.12	0.59	0.41	0.65	26.387
evm.model.scaffold_100.529	0	1.43	1.71	1.71	0.57	0.57	24.201
evm.model.scaffold_100.1370	0.2	2	1.4	1	0.8	0.6	28.951
evm.model.scaffold_100.700	0.65	1.59	1.23	1.73	0.43	0.36	88.434
evm.model.scaffold_100.1055	0	1.5	1.25	2.75	0.5	0	18.19
evm.model.scaffold_100.1760	0.55	2.45	1.91	0.55	0.27	0.27	177.58
evm.model.scaffold_100.378	0.39	1.55	0.97	1.35	1.16	0.58	18.283
evm.model.scaffold_100.536	0.38	2.63	1.13	1.13	0.56	0.19	26.225
evm.model.scaffold_100.1873	1.2	2.4	1.2	0.8	0.4	0	15.119
evm.model.scaffold_100.1431	1.09	0	2.73	0	1.64	0.55	36.848
evm.model.scaffold_100.716	0	1.38	0.46	3.23	0.46	0.46	54.49
evm.model.scaffold_100.188	0.55	1.64	2.18	0.55	0	1.09	353.322
evm.model.scaffold_111.119.1	0.5	2	1.5	0.33	1.17	0.5	13.366
evm.model.scaffold_111.80	0.81	0.97	2.76	0.81	0.16	0.49	12.025
evm.model.scaffold_111.41	0	2.18	1.36	1.91	0	0.55	65.365
evm.model.scaffold_111.111	0.55	2.73	2.18	0	0	0.55	25.364
evm.model.scaffold_111.296	0.43	2.14	1.29	0.86	0.86	0.43	19.653
evm.model.scaffold_111.190	1.83	1.3	1.57	0.26	0.52	0.52	16.832
evm.model.scaffold_111.417	0.59	0.94	1.29	0.59	1.29	1.29	35.359
evm.model.scaffold_111.9	0.61	1.35	1.1	1.47	0.73	0.73	104.918
evm.model.scaffold_111.349	1.2	1.05	2.25	0.75	0.15	0.6	17.358
evm.model.scaffold_111.432	0.79	1.36	1.7	0.45	0.45	1.25	12.461
evm.model.scaffold_111.323	0.19	2.13	1.35	0.58	0.77	0.97	50.63
evm.model.scaffold_111.30	0.52	1.14	1.14	1.45	0.31	1.45	21.755
evm.model.scaffold_111.419	0.83	1.58	2.08	0.42	0.5	0.58	43.344
evm.model.scaffold_111.97	0.71	1.06	1.76	0.82	0.71	0.94	97.545
evm.model.scaffold_111.98	0.63	1.25	1.52	0.99	0.36	1.25	36.642
evm.model.scaffold_111.92	0.18	2	1.27	1.64	0.55	0.36	32.062
evm.model.scaffold_111.59	0	2.25	0.75	0.75	0	2.25	38.745
evm.model.scaffold_111.408	0.67	1.22	1.33	0.89	0.89	1	53.787
evm.model.scaffold_111.6	0.92	1.23	2.15	0.62	0.46	0.62	15.26
evm.model.scaffold_111.281	0.33	0.33	1	1.67	0.67	2	35.723
evm.model.scaffold_111.372	0	1.06	1.06	2.47	0.71	0.71	34.651
evm.model.scaffold_111.283	0	1.85	1.85	0.46	1.38	0.46	33.201
evm.model.scaffold_111.298	0.46	2.31	0.46	1.85	0.92	0	75.859
evm.model.scaffold_111.345	0.95	1.32	2.34	0.22	0.37	0.8	24.809
evm.model.scaffold_111.19	0.74	1.79	1.54	0.45	0.69	0.79	28.029
evm.model.scaffold_111.336	0.22	2.22	0.89	0.44	0.89	1.33	152.962
evm.model.scaffold_111.335	1.62	2.27	0.81	0.32	0.32	0.65	10.596
evm.model.scaffold_111.293	0.7	1.3	1.7	1	0.8	0.5	35.589
evm.model.scaffold_111.412	0.71	1.06	2.12	1.41	0.71	0	159.673
evm.model.scaffold_111.195	0	0	1	3	1	1	110.671
evm.model.scaffold_111.122	0.75	1.65	1.35	0.9	0.75	0.6	21.05
evm.model.scaffold_111.387	0	2.25	2.5	0.75	0	0.5	28.577
evm.model.scaffold_111.442	1.09	0.55	0.55	0	1.64	2.18	43.773
evm.model.scaffold_111.75	0.35	0.53	2.65	0.88	0.35	1.24	14.622
evm.model.scaffold_111.354	1.33	2	2	0	0	0.67	55.971
evm.model.scaffold_111.45	0	2.18	1.09	1.09	0.55	1.09	24.627
evm.model.scaffold_111.313	0.47	1.29	2.24	0.94	0.47	0.59	32.115
evm.model.scaffold_111.381	0.4	1.6	0.6	1	1.2	1.2	41.698
evm.model.scaffold_111.60	0	1.84	0.73	2.08	0.24	1.1	16.139
evm.model.scaffold_111.93	0.86	2	1.14	0.57	0.29	1.14	12.403
evm.model.scaffold_111.24	0.2	1	1	2.8	0.2	0.8	26.479
evm.model.scaffold_111.37.1	0.6	1.5	1.5	0.6	0.3	1.5	49.766
evm.model.scaffold_111.25	0.75	1.3	1.57	0.68	0.89	0.82	16.52
evm.model.scaffold_111.137	0.78	1.33	1.89	0.67	0.56	0.78	215.046
evm.model.scaffold_111.71	0	1	1.5	1.5	0.75	1.25	56.777
evm.model.scaffold_111.264	0.62	2.07	1.66	0	0.62	1.03	40.678
evm.model.scaffold_111.141	0.89	2	2.22	0.33	0.22	0.33	11.695
evm.model.scaffold_111.31	0.38	1.79	1.15	1.4	0.13	1.15	21.148
evm.model.scaffold_111.276_evm.model.scaffold_111.275	0.9	2.1	1.05	0.45	0.15	1.35	13.692
evm.model.scaffold_111.321	1.13	2.25	1.13	0	1.5	0	14.407
evm.model.scaffold_111.162	0.22	2	2	0.67	0.67	0.44	11.703
evm.model.scaffold_111.386	0	0	0.55	4.91	0	0.55	36.156
evm.model.scaffold_111.84	0.3	1.2	2.1	2.1	0	0.3	12.302
evm.model.scaffold_111.171	0.71	1.42	1.73	1.22	0.41	0.51	11.998
evm.model.scaffold_111.126	0.49	0.32	2.92	0.81	0.32	1.14	10.661
evm.model.scaffold_111.132	0	0.86	0.86	2.57	1.29	0.43	13.72
evm.model.scaffold_111.127	0.75	0.9	2.1	0.75	0.75	0.75	29.335
evm.model.scaffold_111.81	0	1.5	2	1	0.5	1	20.046
evm.model.scaffold_111.34.1	1.17	1.32	1.46	0.88	0.59	0.59	33.378
evm.model.scaffold_111.53	0.78	1.04	2.09	1.3	0.26	0.52	71.747
evm.model.scaffold_111.340	0.8	0.8	1.6	1.6	0.8	0.4	39.099
evm.model.scaffold_111.269	0	1.92	2.88	0.24	0.72	0.24	30.698
evm.model.scaffold_111.268	0.67	2	0	0.67	0.67	2	36.07
evm.model.scaffold_111.399	0.46	0.92	0.23	3.23	0.69	0.46	36.649
evm.model.scaffold_111.250	0.36	2.42	1.61	0.54	0.54	0.54	10.195
evm.model.scaffold_111.208	0	0.3	1.8	2.7	0.3	0.9	16.367
evm.model.scaffold_111.401	0.43	2.14	1	1.29	1	0.14	11.489
evm.model.scaffold_111.316	0.12	1.35	2.08	1.1	0.12	1.22	237.597
evm.model.scaffold_111.297	0.25	3	1.5	0.25	0.5	0.5	31.406
evm.model.scaffold_111.373	0.4	0.4	2	2.4	0	0.8	68.415
evm.model.scaffold_111.331	0.59	1.77	1.67	0.59	0.39	0.98	36.741
evm.model.scaffold_111.415	0.21	2.14	1.07	0.64	0.21	1.71	116.47
evm.model.scaffold_111.291	0.91	1.09	2	0.45	0.73	0.82	12.674
evm.model.scaffold_111.355	0	1.5	1.88	1.13	0.38	1.13	49.523
evm.model.scaffold_111.304	0.34	1.92	1.02	1.58	0.91	0.23	33.534
evm.model.scaffold_111.371	0	1	1.33	2.33	1	0.33	27.104
evm.model.scaffold_111.32	0.13	2.04	0.89	0.77	0.51	1.66	20.495
evm.model.scaffold_111.67	0.71	2.12	0.71	0.35	1.06	1.06	154.088
evm.model.scaffold_111.70	1.09	1.09	2.26	0.7	0.23	0.62	16.271
evm.model.scaffold_111.62	0.79	1.5	1.68	0.71	0.71	0.62	13.373
evm.model.scaffold_111.346	0.57	1.71	1.71	0.29	0.57	1.14	20.321
evm.model.scaffold_111.193	0.6	3	1.2	1	0	0.2	14.027
evm.model.scaffold_111.270	0.71	1.36	2	0.57	0.64	0.71	30.495
evm.model.scaffold_111.279	1.02	1.17	2.34	0.59	0.44	0.44	15.118
evm.model.scaffold_111.128	0.52	1.57	1.83	0.78	0.26	1.04	29.938
evm.model.scaffold_111.18	0.43	1.86	2	0.29	0.71	0.71	35.958
evm.model.scaffold_111.36	0	2	1	2	0	1	27.495
evm.model.scaffold_111.420	0.58	2.52	0.77	1.16	0.58	0.39	21.604
evm.model.scaffold_111.142	0	0.67	1.33	2	0.67	1.33	75.388
evm.model.scaffold_111.299.1	0.46	0.92	1.38	2.15	0.77	0.31	83.035
evm.model.scaffold_111.274	0.43	1.08	2.02	0.65	1.01	0.8	22.63
evm.model.scaffold_111.170	0.41	1.24	1.03	1.86	0.41	1.03	54.613
evm.model.scaffold_111.116	0.88	1.75	1.38	0.5	0.25	1.25	11.054
evm.model.scaffold_111.289	0.48	0.72	1.92	1.44	0	1.44	16.448
evm.model.scaffold_111.63	0.96	0.96	2.64	0.24	0.48	0.72	20.757
evm.model.scaffold_111.46	0.28	0.98	2.23	0.7	0.56	1.26	51.015
evm.model.scaffold_111.285	1.29	2.12	0.59	0.82	0.71	0.47	32.459
evm.model.scaffold_111.351	0.35	2.12	1.41	1.06	0.71	0.35	54.701
evm.model.scaffold_111.15	1.18	0.76	1.86	0.59	0.68	0.93	11.766
evm.model.scaffold_111.61	1.03	2.07	1.66	0.83	0.21	0.21	19.498
evm.model.scaffold_111.236	1.04	0.78	1.57	1.04	0.26	1.3	36.739
evm.model.scaffold_111.196	0.6	2.4	0.8	0.6	0.8	0.8	12.362
evm.model.scaffold_111.110	0.5	0.75	1.25	2	0.5	1	11.258
evm.model.scaffold_111.147	0	1.29	0.21	2.79	0	1.71	166.594
evm.model.scaffold_111.103	0.3	1.2	2.1	1.2	0	1.2	719.196
evm.model.scaffold_111.254	0.6	0.6	3	0.6	0	1.2	31.727
evm.model.scaffold_111.78	0	0.33	2.17	1.83	0.17	1.5	43.476
evm.model.scaffold_111.352.4	0.86	1.29	3	0.43	0	0.43	28.675
evm.model.scaffold_111.160	0	1.5	1.5	1.5	0.5	1	530.064
evm.model.scaffold_111.267	0	1.91	3	0.55	0.27	0.27	19.504
evm.model.scaffold_111.260_evm.model.scaffold_111.261	0.44	1.56	1.33	0.89	0.67	1.11	25.259
evm.model.scaffold_111.385	0.19	1.94	1.74	0.77	0	1.35	21.455
evm.model.scaffold_111.398	0.56	1.44	1.44	1	0.67	0.89	39.045
evm.model.scaffold_111.69	0.61	1.96	1.59	0.24	0.49	1.1	10.489
evm.model.scaffold_111.44	0	1.88	1.69	1.31	0.38	0.75	347.489
evm.model.scaffold_111.290	0.95	1.89	1.89	0.95	0	0.32	16.105
evm.model.scaffold_111.198	0.75	3	0	0.75	0	1.5	11.702
evm.model.scaffold_111.319	1	0.67	2.33	1	0.67	0.33	10.735
evm.model.scaffold_111.390.2	0.43	2.14	1.71	0.43	0.43	0.86	130.203
evm.model.scaffold_23.103	0.47	1.89	1.26	0.32	0.95	1.11	14.351
evm.model.scaffold_23.16	1.2	2.4	0	2.4	0	0	29.278
evm.model.scaffold_23.92.1	0.5	1.83	0.83	0.33	0.33	2.17	356.697
evm.model.scaffold_23.45	0.53	1.07	2.13	0.67	0.53	1.07	17.461
evm.model.scaffold_23.49	0	0.46	0.92	3.23	0.46	0.92	18.174
evm.model.scaffold_23.93	0.82	1.91	1.36	0.82	0.82	0.27	20.432
evm.model.scaffold_23.22	0.7	1.12	1.26	1.67	0.14	1.12	32.917
evm.model.scaffold_23.25.1	0	2.31	0.46	1.85	0.46	0.92	84.389
evm.model.scaffold_23.36	0.34	0.86	1.37	1.54	0.34	1.54	22.217
evm.model.scaffold_23.12	0.81	0.97	2.27	0.97	0.32	0.65	31.929
evm.model.scaffold_23.7	0.96	2.04	1.08	0.36	0.24	1.32	17.189
evm.model.scaffold_23.17	1.57	1.83	1.3	0.26	0.78	0.26	21.705
evm.model.scaffold_23.2	1.65	1.95	0.6	0.75	0.6	0.45	33.004
evm.model.scaffold_23.6	0.86	1.65	1.45	0.53	0.73	0.79	12.526
evm.model.scaffold_23.18	0	3.43	1.71	0	0.86	0	19.747
evm.model.scaffold_23.8	0.68	2.04	1.02	0.45	0.45	1.36	28.413
evm.model.scaffold_23.90	0.6	1.5	1.5	0.3	0.9	1.2	29.288
evm.model.scaffold_23.48	0.33	1.67	1.33	1.33	0.33	1	13.129
evm.model.scaffold_335.40	0.55	0.82	3	0.82	0.55	0.27	26.168
evm.model.scaffold_335.11	0	0.82	1.36	1.36	0.55	1.91	10.094
evm.model.scaffold_335.9	0.5	0.5	3.5	0	0.5	1	83.103
evm.model.scaffold_335.32	0.75	1.65	1.5	0.45	0.3	1.35	26.984
evm.model.scaffold_335.53	0.67	2.22	2	0.44	0.44	0.22	89.319
evm.model.scaffold_335.24	1.29	1.14	1.86	0.43	0.71	0.57	19.59
evm.model.scaffold_335.12	0.24	0	2.88	1.44	0.72	0.72	24.233
evm.model.scaffold_335.8	0	1.43	0.86	2	0	1.71	74.953
evm.model.scaffold_335.34	0	1.69	0.94	2.34	0.28	0.75	33.903
evm.model.scaffold_335.30	1.11	1.78	0.67	0.67	1.11	0.67	22.451
evm.model.scaffold_335.23	0.88	1.76	2.12	0.35	0.18	0.71	15.786
evm.model.scaffold_335.5	1.5	1.5	2.25	0	0	0.75	11.28
evm.model.scaffold_335.47	0.44	1.11	2.44	0.44	0.89	0.67	10.281
evm.model.scaffold_335.1	1.14	1.71	2	0	0.57	0.57	40.658
evm.model.scaffold_335.26.2	0.68	1.35	1.77	0.93	0.25	1.01	24.77
evm.model.scaffold_335.6	0.64	0.64	1.29	0	1.07	2.36	11.083
evm.model.scaffold_181.28	0.2	1.97	1.48	0.3	0.59	1.48	12.149
evm.model.scaffold_181.19	0.96	1.56	1.56	0.72	0.6	0.6	26.723
evm.model.scaffold_181.20	0.55	1.64	2.18	0.73	0.73	0.18	36.724
evm.model.scaffold_181.11	0.3	3	1.5	0.3	0.3	0.6	569.931
evm.model.scaffold_181.24	0.6	0	1.8	0	1.8	1.8	10.327
evm.model.scaffold_181.44	0.35	1.81	1.67	0.56	0.42	1.19	11.829
evm.model.scaffold_181.56	1	1	1	1	0	2	130.005
evm.model.scaffold_181.60	0.5	0	0.5	3.5	0	1.5	69.066
evm.model.scaffold_181.55	0.43	1.07	0.21	2.57	0.21	1.5	15.536
evm.model.scaffold_181.15	0.68	1.27	0.9	1.5	0.38	1.27	22.03
evm.model.scaffold_181.32	0.62	1.66	1.86	1.03	0.62	0.21	14.921
evm.model.scaffold_6.5	0.55	1.64	1.64	1.09	1.09	0	10.874
evm.model.scaffold_31.82	1	1.5	1	1	0	1.5	29.092
evm.model.scaffold_31.78	0.63	1.56	1.79	0.52	0.58	0.92	11.413
evm.model.scaffold_31.26	0.55	1.09	1.64	1.09	1.09	0.55	17.917
evm.model.scaffold_31.8	1.18	1.91	0.73	0.82	0.36	1	56.604
evm.model.scaffold_31.63	0.29	0.57	1.71	1.71	0.57	1.14	49.038
evm.model.scaffold_31.10	0.71	1.06	0.53	1.76	0.88	1.06	19.915
evm.model.scaffold_31.100	0.4	2.4	1.2	0.8	0.8	0.4	234.02
evm.model.scaffold_31.21	0	0	3	2	0	1	391.846
evm.model.scaffold_31.25	0.7	1.34	1.6	0.83	0.51	1.02	10.573
evm.model.scaffold_31.64	0	0.51	1.2	2.23	0.86	1.2	13.415
evm.model.scaffold_31.118	1.71	2.29	0.86	0.29	0.57	0.29	672.478
evm.model.scaffold_31.22	0	0.8	0.4	2	0	2.8	120.716
evm.model.scaffold_31.124	0.52	1.04	1.04	0.78	0.52	2.09	60.215
evm.model.scaffold_31.77	0.46	1.85	0.92	0.92	0.46	1.38	840.892
evm.model.scaffold_31.19	1	1.67	1.67	0.67	0.33	0.67	119.592
evm.model.scaffold_31.35	1.1	1.02	1.61	0.66	0.66	0.95	16.782
evm.model.scaffold_160.14	1.55	1.36	1.45	0.27	0.45	0.91	15.712
evm.model.scaffold_160.19	0	1.71	0.96	1.39	0.11	1.82	26.54
evm.model.scaffold_160.13	1.6	1.2	1.73	0.27	0.27	0.93	23.273
evm.model.scaffold_160.7	1.71	1.71	2	0	0.57	0	35.276
evm.model.scaffold_160.25	0	1.09	1.09	2.73	0.55	0.55	54.134
evm.model.scaffold_160.1	0.97	0.77	1.35	0.97	0.77	1.16	23.2
evm.model.scaffold_160.6	0.33	1.33	1	0.67	1.33	1.33	43.346
evm.model.scaffold_421.3	0.66	0.84	2.53	1.03	0.38	0.56	14.836
evm.model.scaffold_1.2	0.46	0.46	2.31	1.15	0.23	1.38	11.393
evm.model.scaffold_3.32	0.52	1.86	1.03	1.14	0.31	1.14	19.354
evm.model.scaffold_3.66	1.5	0.75	2.25	0	1.5	0	12.218
evm.model.scaffold_3.15	0.48	1.28	1.44	1.6	0.32	0.88	12.805
evm.model.scaffold_3.31	0.96	1.32	1.8	0.6	0.6	0.72	10.844
evm.model.scaffold_3.71	0.79	0.98	1.57	0.98	0.39	1.28	11.052
evm.model.scaffold_3.85	0.75	1.67	1.58	0.67	0.42	0.92	12.646
evm.model.scaffold_3.45	0	2.5	0	1.5	0	2	14.528
evm.model.scaffold_189.19	0.67	1.5	1.5	0.67	0.33	1.33	16.407
evm.model.scaffold_189.39	0	1.03	1.45	1.66	0.62	1.24	11.104
evm.model.scaffold_189.86	0.8	1.51	1.51	0.76	0.61	0.8	50.35
evm.model.scaffold_189.31	1	1.5	1.13	1.38	0.38	0.63	25.316
evm.model.scaffold_189.11	0	2.57	1.29	0.43	0.86	0.86	77.597
evm.model.scaffold_189.88	0	1.71	1.43	1	0.71	1.14	14.082
evm.model.scaffold_189.82	0.32	0.95	0.32	1.89	0.32	2.21	102.259
evm.model.scaffold_189.34	0.84	1.37	1.89	0.42	0.84	0.63	128.233
evm.model.scaffold_189.40	0.72	1.44	1.56	0.72	0.72	0.84	11.909
evm.model.scaffold_189.91	0	2	1.33	0.67	0.67	1.33	14.707
evm.model.scaffold_189.97	0.27	0.82	1.64	1.64	0	1.64	17.527
evm.model.scaffold_189.100	0.21	2.36	1.71	0.21	0.86	0.64	17.094
evm.model.scaffold_189.18	0.56	2.25	1.31	1.13	0	0.75	29.808
evm.model.scaffold_189.26	0.75	0.75	0.75	0.75	1.13	1.88	10.657
evm.model.scaffold_189.46	0	1.09	0.27	2.18	0.55	1.91	37.825
evm.model.scaffold_189.24	0	1.36	0.27	3.14	0.14	1.09	88.13
evm.model.scaffold_189.72	0.5	0.5	1	1	0.5	2.5	23.273
evm.model.scaffold_189.14	0.46	1.62	1.15	0.69	0.46	1.62	74.78
evm.model.scaffold_189.76	0.5	1.13	0.75	2	0.5	1.13	44.235
evm.model.scaffold_189.85	0.81	0.97	1.95	1.62	0.32	0.32	24.42
evm.model.scaffold_189.55	1.3	1.46	1.78	0.49	0.16	0.81	12.846
evm.model.scaffold_189.71	0.86	0.43	1.29	1.71	0.86	0.86	21.682
evm.model.scaffold_189.62	0.86	1.1	0.86	1.35	0.37	1.47	13.603
evm.model.scaffold_189.98	1.8	1.2	0	0	1.8	1.2	29.903
evm.model.scaffold_189.89	0.55	2.73	0.55	0.55	0.55	1.09	58.281
evm.model.scaffold_189.38	0.91	1.27	2.36	0.91	0.18	0.36	22.422
evm.model.scaffold_189.45	0.36	1.27	1.64	0.55	0.73	1.45	54.874
evm.model.scaffold_189.75	0.38	3.38	1.13	0	0	1.13	86.27
evm.model.scaffold_394.385	2.4	1.2	1.8	0.6	0	0	10.612
evm.model.scaffold_394.141	0.6	0.6	2.1	0.6	0.6	1.5	60.044
evm.model.scaffold_394.537	0.12	0.86	0.61	3.06	0.37	0.98	235.313
evm.model.scaffold_394.92	0	1.37	1.16	2.53	0	0.95	143.287
evm.model.scaffold_394.320	0.63	1.38	1.13	1	0.88	1	19.789
evm.model.scaffold_394.291	0.39	1.35	2.52	0.97	0	0.77	59.039
evm.model.scaffold_394.65	0.16	0.81	1.14	2.11	0.32	1.46	47.28
evm.model.scaffold_394.184	1.71	2.57	0.86	0	0	0.86	192.107
evm.model.scaffold_394.5	0.88	1.76	1.06	1.24	0.35	0.71	11.169
evm.model.scaffold_394.421	0.27	0.27	1.36	2.18	0.27	1.64	41.899
evm.model.scaffold_394.176	0.64	1.57	1.38	1.43	0.3	0.69	10.544
evm.model.scaffold_394.272	0.43	1.71	1.71	1.29	0.43	0.43	62.986
evm.model.scaffold_394.536	0.5	2	1.75	0.75	0.25	0.75	14.064
evm.model.scaffold_394.180	0.36	1.27	2	0.36	1.09	0.91	41.008
evm.model.scaffold_394.195	0	1.5	1.5	0.75	0	2.25	89.703
evm.model.scaffold_394.369	0.89	1.4	1.72	0.77	0.38	0.83	11.009
evm.model.scaffold_394.185	1	1.33	1.67	0.67	0.67	0.67	201.135
evm.model.scaffold_394.319	0	1.85	0.77	2	0.15	1.23	48.259
evm.model.scaffold_394.162	0	3	1.2	0.6	0.6	0.6	113.701
evm.model.scaffold_394.429	0	2.75	0.25	2.75	0	0.25	17.435
evm.model.scaffold_394.40	1.71	1.29	0.43	0.86	0.86	0.86	33.186
evm.model.scaffold_394.104.1	0.9	3.3	0.6	0.6	0.3	0.3	60.189
evm.model.scaffold_394.67	1	2	1.75	0.5	0	0.75	32.945
evm.model.scaffold_394.508	0.67	0.33	2.67	1.33	0.5	0.5	20.7
evm.model.scaffold_394.22	0.9	1.5	1.5	0.9	0.6	0.6	72.871
evm.model.scaffold_394.170	0.84	1.4	1.26	0.7	0.42	1.4	30.07
evm.model.scaffold_394.563	0.55	1.09	2.73	0.55	0.55	0.55	69.156
evm.model.scaffold_394.527	0.35	1.41	1.41	1.41	0.71	0.71	137.265
evm.model.scaffold_394.181	0	2.14	0.86	1.29	1.29	0.43	43.526
evm.model.scaffold_394.490	0.4	1.43	1.43	1.49	0.51	0.74	49.711
evm.model.scaffold_394.77	0	1.03	0.41	3.72	0	0.83	28.084
evm.model.scaffold_394.292	1.33	1.33	1	0.33	1.33	0.67	26.68
evm.model.scaffold_394.496_evm.model.scaffold_394.497	1.06	0.94	2.59	0.59	0.12	0.71	60.767
evm.model.scaffold_394.152	0	0.5	0.5	2	0.25	2.75	143.551
evm.model.scaffold_394.270	1.64	1.64	0.95	0.68	0.68	0.41	12.855
evm.model.scaffold_394.309.2	0.67	1.26	1.56	1.26	0.81	0.44	155.297
evm.model.scaffold_394.182	0.38	0.94	2.44	0.94	0.38	0.94	15.392
evm.model.scaffold_394.529	0.52	1.3	1.65	0.78	0.61	1.13	15.484
evm.model.scaffold_394.146	1.5	2.25	0.75	0.38	0.75	0.38	41.757
evm.model.scaffold_394.495	0.73	1.18	1.64	0.64	0.27	1.55	10.504
evm.model.scaffold_394.342	0.56	1.69	1.13	1.69	0.19	0.75	167.958
evm.model.scaffold_394.441	0.78	1.17	1.7	0.78	0.52	1.04	63.242
evm.model.scaffold_394.557	0.43	1.71	0.86	1.29	0.86	0.86	41.964
evm.model.scaffold_394.553	0.75	1.63	1.25	0.5	0.63	1.25	44.799
evm.model.scaffold_394.335	0.43	1.71	1.5	0.43	0.86	1.07	10.526
evm.model.scaffold_394.428	0.86	0.86	3.43	0.86	0	0	38.206
evm.model.scaffold_394.387	0.5	1	0.5	2	0.5	1.5	170.838
evm.model.scaffold_394.351	1	1	1.5	0.25	0.5	1.75	12.864
evm.model.scaffold_394.163	0	1.13	0.88	1.88	0.88	1.25	50.403
evm.model.scaffold_394.58	0	0.32	0	1.58	0.32	3.79	17.168
evm.model.scaffold_394.399	0.99	1.51	1.61	0.47	0.76	0.66	20.928
evm.model.scaffold_394.535.1	0.51	1.49	1.54	0.57	0.63	1.26	81.998
evm.model.scaffold_394.547	0.53	1.47	1.26	0.84	0.84	1.05	14.716
evm.model.scaffold_394.458	1.43	1.3	1.3	0.26	0.78	0.91	21.083
evm.model.scaffold_394.8	1.05	1.65	1.71	0.26	0.73	0.59	10.094
evm.model.scaffold_394.131	0.71	1.76	1.24	1.06	0.53	0.71	37.584
evm.model.scaffold_394.459	0	0.86	0	1.71	2.57	0.86	36.113
evm.model.scaffold_394.353.2	0.62	1.36	1.48	0.49	0.93	1.11	13.486
evm.model.scaffold_394.264	0.32	1.26	2.21	1.58	0	0.63	21.583
evm.model.scaffold_394.147	0.24	0.24	1.92	0.96	0.48	2.16	49.839
evm.model.scaffold_394.119	0.76	1.24	1.62	0.76	0.76	0.86	13.583
evm.model.scaffold_394.519	0	1.2	1.2	1.2	0.8	1.6	11.277
evm.model.scaffold_394.290	0.29	2	1.71	0.29	0.57	1.14	11.563
evm.model.scaffold_394.517	0	0.6	2.4	1.8	0.6	0.6	30.63
evm.model.scaffold_394.328	0	0.6	1.8	3.6	0	0	143.976
evm.model.scaffold_394.372	0.36	0.73	1.27	2.18	0.36	1.09	27.496
evm.model.scaffold_394.348	0.52	2.35	1.83	0.78	0.52	0	78.092
evm.model.scaffold_394.20	0.81	1.14	2.11	0.65	0.32	0.97	75.435
evm.model.scaffold_394.35	0.2	1.25	1.05	1.71	0.33	1.45	31.506
evm.model.scaffold_394.114	0	0	3	2.25	0	0.75	39.083
evm.model.scaffold_394.463	0.47	1.42	1.74	1.58	0.79	0	74.047
evm.model.scaffold_394.167	0	0.38	0.75	4.13	0	0.75	19.171
evm.model.scaffold_394.173	0.53	1.59	0.88	1.06	0.88	1.06	80.774
evm.model.scaffold_394.395	1.09	1.09	1.5	1.09	0.55	0.68	14.444
evm.model.scaffold_394.365	0.6	2	0.6	1	1	0.8	12.127
evm.model.scaffold_394.410	0.54	1.34	1.88	0.81	0.63	0.81	59.014
evm.model.scaffold_394.424	0	0.2	1.4	2	0.2	2.2	654.145
evm.model.scaffold_394.214	0.82	1.58	1.65	0.9	0.45	0.6	11.818
evm.model.scaffold_394.28	0	0.38	0.56	2.44	0.19	2.44	23.424
evm.model.scaffold_394.134	0.84	0.94	1.88	0.84	0.66	0.84	42.397
evm.model.scaffold_394.135	0	1.67	1.33	2	0.33	0.67	105.393
evm.model.scaffold_394.312	0.23	2.08	1.15	0.92	0.92	0.69	42.427
evm.model.scaffold_394.68	0	1.5	0	1.5	0	3	122.274
evm.model.scaffold_394.212	0.92	1.11	1.69	0.73	0.82	0.73	30.825
evm.model.scaffold_394.273	0.72	1.08	0.96	2.04	0.24	0.96	12.535
evm.model.scaffold_394.357	0	2.12	1.76	1.06	0.35	0.71	13.251
evm.model.scaffold_394.36	0.56	2.06	1.13	1.31	0.38	0.56	24.749
evm.model.scaffold_394.108	0.5	1.46	1.51	1.06	0.61	0.86	45.399
evm.model.scaffold_394.405	0.53	2.53	0.95	0.32	0.74	0.95	17.07
evm.model.scaffold_394.346	0	1.3	0.78	1.04	0.26	2.61	10.351
evm.model.scaffold_394.11	0.62	1.86	1.76	0.72	0.31	0.72	49.021
evm.model.scaffold_394.226	1.09	1.64	1.5	0.68	0.68	0.41	54.384
evm.model.scaffold_394.389	0.53	1.41	1.76	0.94	0.59	0.76	20.08
evm.model.scaffold_394.337	0.68	1.7	1.25	1.25	0.34	0.79	55.205
evm.model.scaffold_394.265	0.35	0.71	3.53	0	0.71	0.71	46.229
evm.model.scaffold_394.59	0.38	0.38	0	4.5	0	0.75	396.268
evm.model.scaffold_394.288	1.12	1.26	1.53	1.12	0.28	0.7	27.972
evm.model.scaffold_394.445	0.65	0.92	1.48	1.2	0.46	1.29	15.385
evm.model.scaffold_394.518	0	1.31	1.22	1.5	0.66	1.31	338.811
evm.model.scaffold_394.564	1.15	0.46	1.62	1.15	0.23	1.38	20.9
evm.model.scaffold_394.440	0.69	1.71	1.2	0.51	0.86	1.03	10.488
evm.model.scaffold_394.340	0.55	1.15	2.24	0.3	0.73	1.03	10.919
evm.model.scaffold_394.394	0.91	2.36	1.64	0.18	0.18	0.73	25.215
evm.model.scaffold_394.350	0.32	0.86	1.82	1.18	0.54	1.29	63.837
evm.model.scaffold_394.150	1	3	1	0	0	1	91.868
evm.model.scaffold_394.43	0.46	0.62	0.77	2.15	0.31	1.69	20.155
evm.model.scaffold_394.502	0.49	0.87	1.61	1.24	0.62	1.18	21.033
evm.model.scaffold_394.388	0.5	1.25	2.25	1.5	0	0.5	12.359
evm.model.scaffold_394.451	1.29	2.14	0.43	1.29	0	0.86	29.211
evm.model.scaffold_394.522	0.15	0.59	0.88	2.05	0.88	1.46	112.923
evm.model.scaffold_394.383	0.56	1.31	1.5	0.56	0.56	1.5	21.671
evm.model.scaffold_394.362	0.84	1.32	1.8	0.96	0.36	0.72	136.347
evm.model.scaffold_394.416	0.41	0.93	1.55	2.07	0.31	0.72	21.347
evm.model.scaffold_394.192	1.13	1.13	0.38	1.88	0	1.5	19.926
evm.model.scaffold_394.330	0.83	1.5	1.67	0.5	0.5	1	28.689
evm.model.scaffold_394.126	0.69	1.38	1.57	1.18	0.3	0.89	23.19
evm.model.scaffold_394.464	0	0	2	1.2	1.2	1.6	91.14
evm.model.scaffold_394.120	0.98	1.81	1.4	0.28	0.84	0.7	10.344
evm.model.scaffold_394.442	0.33	1.67	0.67	2.67	0.67	0	68.634
evm.model.scaffold_394.548	0.38	0.38	1.13	2.25	0.75	1.13	13.044
evm.model.scaffold_394.382	0	1.86	0.83	2.07	0.83	0.41	952.058
evm.model.scaffold_394.138.1	0.82	1.76	1.65	0.41	0.59	0.76	16.9
evm.model.scaffold_394.512	0.8	1.6	1.2	0.8	0.2	1.4	26.105
evm.model.scaffold_394.400	0.38	2.81	1.13	0.75	0.38	0.56	184.065
evm.model.scaffold_394.66	0	2	1.4	1	1.2	0.4	90.925
evm.model.scaffold_394.132	0.62	1.76	1.86	0.62	0.62	0.52	12.625
evm.model.scaffold_394.154	0.78	1.3	1.3	0.52	1.04	1.04	334.172
evm.model.scaffold_394.412.1	0	1.3	2.09	1.3	0.52	0.78	365.343
evm.model.scaffold_394.149	0.69	2.25	0.81	1.1	0.23	0.92	11.255
evm.model.scaffold_394.555	0.67	1.22	2	0.67	0.67	0.78	14.003
evm.model.scaffold_394.63	0.75	1.5	1.13	0.38	1.5	0.75	34.395
evm.model.scaffold_394.552	0.67	1.5	1.67	0.83	0.33	1	379.606
evm.model.scaffold_394.39	1.33	1	1	0.67	1.33	0.67	48.154
evm.model.scaffold_394.140	0.95	1.89	1.26	0.32	0.95	0.63	44.481
evm.model.scaffold_394.128	0.24	2.64	0.24	1.44	0.48	0.96	24.169
evm.model.scaffold_394.551	0.91	1.6	1.26	0.63	0.69	0.91	23.387
evm.model.scaffold_394.52	0.7	1.2	1.6	0.8	0.7	1	10.761
evm.model.scaffold_394.300	0.31	2.14	1.63	0.61	0.92	0.41	24.083
evm.model.scaffold_394.452	1.58	2.53	0.95	0	0.32	0.63	38.519
evm.model.scaffold_394.136.1	0.25	1.5	1.75	0.5	0.25	1.75	34.628
evm.model.scaffold_394.413	0.35	2.33	1.63	0.7	0.41	0.58	27.718
evm.model.scaffold_394.165	1.71	0.43	2.14	0.86	0.43	0.43	27.223
evm.model.scaffold_394.446	0.84	1.95	1.4	1.26	0.28	0.28	19.32
evm.model.scaffold_394.95	0.46	1.38	1.15	2.31	0.23	0.46	30.233
evm.model.scaffold_394.225	1.2	2.4	0.6	0.6	1.2	0	12.654
evm.model.scaffold_394.384	0.56	0.84	2.37	1.26	0.14	0.84	50.064
evm.model.scaffold_394.112	0.77	1.55	1.35	1.35	0.19	0.77	17.73
evm.model.scaffold_394.151	0	1.2	1.2	2.23	0.34	1.03	36.008
evm.model.scaffold_394.531	1.5	1.13	1.13	1.5	0.38	0.38	21.438
evm.model.scaffold_394.352	0.86	0.86	1.71	0.86	0.86	0.86	334.032
evm.model.scaffold_394.558	0.21	1.66	2.28	1.24	0	0.62	2105.94
evm.model.scaffold_394.44	0.42	1.25	1.33	1.25	0.58	1.17	69.388
evm.model.scaffold_394.235	0.09	1.79	0.54	1.7	0.63	1.25	40.715
evm.model.scaffold_394.183	0.43	1.71	1.29	0.43	0.43	1.71	128.095
evm.model.scaffold_394.499	0.6	2	1	1.4	0	1	112.6
evm.model.scaffold_394.208	0	0.4	1.2	2.4	0.4	1.6	156.884
evm.model.scaffold_394.110	0.82	1.38	2	0.56	0.44	0.79	15.972
evm.model.scaffold_394.116	0	1.35	0.97	2.32	0.39	0.97	10.517
evm.model.scaffold_394.4	1.06	2	1.29	0.71	0.24	0.71	12.819
evm.model.scaffold_394.431	1.5	0	0	0	1.5	3	14.74
evm.model.scaffold_394.80.1	1	1.33	1.67	0.33	0.5	1.17	55.5
evm.model.scaffold_394.153	0.79	1.74	0.79	1.26	0.63	0.79	31.714
evm.model.scaffold_394.541	0	1.64	1.36	1.91	0	1.09	73.863
evm.model.scaffold_394.148	0	1.09	1.64	2.18	0.55	0.55	100.152
evm.model.scaffold_394.121	0	2.25	0	2.25	0	1.5	14.418
evm.model.scaffold_394.514.1	0.71	1.14	1.71	1	0.29	1.14	18.828
evm.model.scaffold_47.3	0.92	0.69	1.15	1.15	0.69	1.38	24.769
evm.model.scaffold_44.272	0	0.67	2	2	0	1.33	18.69
evm.model.scaffold_44.496	0.3	0.9	0.9	2.1	0.3	1.5	47.619
evm.model.scaffold_44.38	1.09	1.64	1.64	0.73	0.73	0.18	35.968
evm.model.scaffold_44.245	1.41	1.06	0.71	1.06	0.71	1.06	17.826
evm.model.scaffold_44.468	0.44	2.29	1.41	0.26	0.71	0.88	11.022
evm.model.scaffold_44.135	0	1.78	1.78	1.33	0.44	0.67	29.662
evm.model.scaffold_44.474	0.92	2.31	0.92	0	0	1.85	52.511
evm.model.scaffold_44.358	0.65	1.47	1.52	0.75	0.68	0.93	10.594
evm.model.scaffold_44.361	0.28	1.12	1.12	1.12	0.98	1.4	14.762
evm.model.scaffold_44.520	0	1	1.5	3	0	0.5	51.131
evm.model.scaffold_44.50	0.53	1.24	1.24	1.06	0.88	1.06	11.666
evm.model.scaffold_44.433	0	0.75	3	1.5	0.75	0	13.785
evm.model.scaffold_44.87	0.4	0.4	2	0.4	0.4	2.4	53.771
evm.model.scaffold_44.118	0.8	1.2	1.2	0.4	0.8	1.6	22.838
evm.model.scaffold_44.383	1.03	0.83	1.24	0.62	0.41	1.86	13.308
evm.model.scaffold_44.216	1.02	2.05	1.02	0.44	0.59	0.88	16.137
evm.model.scaffold_44.347	1.5	0	3	0	1.5	0	31.861
evm.model.scaffold_44.449	0.44	1.61	0.88	2.05	0.15	0.88	32.135
evm.model.scaffold_44.258	0	0.69	0.69	1.85	1.15	1.62	57.986
evm.model.scaffold_44.403	0.36	2.55	1.45	0.91	0.18	0.55	131.432
evm.model.scaffold_44.122	0	2.08	1.38	0.23	0.23	2.08	1544.53
evm.model.scaffold_44.69	0.73	0.91	1.27	1.27	0.55	1.27	11.887
evm.model.scaffold_44.379	0	1.09	1.91	1.09	0	1.91	326.863
evm.model.scaffold_44.48	0.72	1.44	2.16	0.96	0.24	0.48	20.378
evm.model.scaffold_44.219	0.27	1.09	1.64	1.64	1.09	0.27	70.364
evm.model.scaffold_44.33	0.42	0.98	1.95	1.53	0.42	0.7	10.904
evm.model.scaffold_44.42	0.75	1.5	0.75	2.25	0.75	0	15.272
evm.model.scaffold_44.243	0.96	0.24	1.2	2.4	0.72	0.48	55.337
evm.model.scaffold_44.273	0.4	2	2	0.4	0.4	0.8	22.678
evm.model.scaffold_44.304	1	2.5	1	1	0	0.5	10.235
evm.model.scaffold_44.287	0.35	2.12	1.41	1.06	0	1.06	27.036
evm.model.scaffold_44.170	0.88	1.41	1.76	0.53	0.88	0.53	21.07
evm.model.scaffold_44.390	1.07	1.64	1.97	0.49	0.16	0.66	28.679
evm.model.scaffold_44.173	0.47	1.5	1.78	0.75	0.75	0.75	15.21
evm.model.scaffold_44.335_evm.model.scaffold_44.336	0.62	1.58	1.54	0.62	0.67	0.96	34.332
evm.model.scaffold_44.24	0.67	1.78	1.78	0	0.44	1.33	22.753
evm.model.scaffold_44.213	0.21	2.07	1.45	0.41	0.62	1.24	11.662
evm.model.scaffold_44.244	1.41	0.35	1.06	1.76	1.06	0.35	165.418
evm.model.scaffold_44.109	0.82	0.95	1.77	1.23	0.41	0.82	11.31
evm.model.scaffold_44.257	1.26	2.21	1.26	0.63	0	0.63	56.816
evm.model.scaffold_44.476	0.94	2.06	1.5	0.28	0.28	0.94	30.894
evm.model.scaffold_44.454	0.48	1.2	1.2	1.2	0.72	1.2	13.607
evm.model.scaffold_44.35	1.05	0.98	1.58	0.9	0.3	1.2	17.992
evm.model.scaffold_44.128.1	1.16	2.32	0.77	0.97	0.77	0	12.551
evm.model.scaffold_44.512	0.4	1.2	1.07	2.4	0	0.93	32.226
evm.model.scaffold_44.282	0	0.6	0.6	4.2	0	0.6	24.939
evm.model.scaffold_44.368	0.43	1.43	2.14	1.14	0.29	0.57	10.248
evm.model.scaffold_44.108	0.51	1.54	2.74	0.51	0	0.69	28.007
evm.model.scaffold_44.256	0.23	1.79	0.94	1.79	0.62	0.62	45.76
evm.model.scaffold_44.401	1.2	2.1	1.5	0.3	0.6	0.3	443.558
evm.model.scaffold_44.348	0.86	0	3.43	0	1.71	0	17.205
evm.model.scaffold_44.137	0	1.07	1.71	0.86	0.86	1.5	18.65
evm.model.scaffold_44.505	0.69	1.2	2.23	1.2	0.17	0.51	98.374
evm.model.scaffold_44.79	0.47	2.05	2.05	0.16	0.47	0.79	41.738
evm.model.scaffold_44.382	0.82	2.45	0.82	0.55	0.27	1.09	10.818
evm.model.scaffold_44.136	1.5	2.4	1.5	0	0	0.6	14.809
evm.model.scaffold_44.504	0.33	2	1	1	1	0.67	34.399
evm.model.scaffold_44.186.1	0.32	1.89	0.63	0.63	0.63	1.89	104.368
evm.model.scaffold_44.115	0	1.69	2.06	1.13	0.19	0.94	267.287
evm.model.scaffold_44.290	0	1.8	1.2	1.8	0.6	0.6	16.063
evm.model.scaffold_44.250	0.69	1.54	1.71	0.51	1.03	0.51	143.926
evm.model.scaffold_44.58	0.3	4.8	0.6	0.3	0	0	10.271
evm.model.scaffold_44.399	0.8	0.91	2.4	0.51	0.63	0.74	29.313
evm.model.scaffold_44.503	0.9	1.34	1.52	0.63	0.9	0.72	24.023
evm.model.scaffold_44.525	0.74	1.37	1.68	0.63	0.42	1.16	17.114
evm.model.scaffold_44.308	0.38	1.88	1.88	1.13	0.75	0	20.983
evm.model.scaffold_44.373	1.2	1.6	1.6	1.2	0.4	0	63.461
evm.model.scaffold_44.489	0	2.25	0.75	1.5	0.75	0.75	142.816
evm.model.scaffold_44.427	0	1.64	2.18	1.09	0.55	0.55	11.603
evm.model.scaffold_44.154	0.83	1	2	1.33	0.33	0.5	20.626
evm.model.scaffold_44.350	1.03	1.59	1.52	0.9	0.34	0.62	35.417
evm.model.scaffold_44.330	0.49	0.81	1.78	1.62	0.65	0.65	76.132
evm.model.scaffold_44.193	0.89	1.11	1.78	1.22	0.67	0.33	10.894
evm.model.scaffold_44.283	0.79	1.32	1.5	0.53	0.35	1.5	21.143
evm.model.scaffold_44.527	1.05	1.47	1.47	0.52	0.52	0.98	21.492
evm.model.scaffold_44.305	0.43	1.29	0.86	1.29	0.86	1.29	10.667
evm.model.scaffold_44.60	0.17	1.83	1.17	1.17	0.67	1	34.106
evm.model.scaffold_44.29	0.86	3.43	0.43	0	0	1.29	11.763
evm.model.scaffold_44.491	0.24	1.56	1.8	1.08	0.48	0.84	16.094
evm.model.scaffold_44.469	0.55	2.73	0.82	1.09	0.27	0.55	24.9
evm.model.scaffold_44.224	0.27	1.09	1.64	1.64	1.09	0.27	50.172
evm.model.scaffold_44.483	0.92	0.92	1.38	1.38	0.46	0.92	17.067
evm.model.scaffold_44.375	0.74	1.05	2.21	0.63	0.53	0.84	76.153
evm.model.scaffold_44.112	0	1.64	1.36	1.91	0.55	0.55	138.258
evm.model.scaffold_44.255	0.33	1.33	1.67	0.33	1.33	1	37.685
evm.model.scaffold_44.362	0.18	2	1	1.36	0.91	0.55	44.772
evm.model.scaffold_44.492	0.52	2.09	1.83	0.52	0.52	0.52	144.429
evm.model.scaffold_44.310	0.21	2.28	1.24	1.34	0.21	0.72	22.307
evm.model.scaffold_44.23	0.49	1.62	1.62	0.65	0.32	1.3	25.812
evm.model.scaffold_44.384	0	1.33	2	1.33	0	1.33	49.245
evm.model.scaffold_44.168	0.43	1.54	1.97	1.11	0.26	0.69	27.981
evm.model.scaffold_44.116	0.43	0.86	2.57	2.14	0	0	29.926
evm.model.scaffold_44.119	1.33	1.24	1.33	0.38	0.95	0.76	14.928
evm.model.scaffold_44.331	1.16	1.55	1.16	0.97	0.58	0.58	104.161
evm.model.scaffold_44.515	0.72	1.68	1.2	1.44	0.48	0.48	70.955
evm.model.scaffold_44.155	0.81	1.38	1.15	0.69	1.15	0.81	22.26
evm.model.scaffold_44.470	0.64	1.29	1.5	1.5	0.86	0.21	10.987
evm.model.scaffold_44.86	0.64	1.64	1.36	0.73	0.64	1	110.48
evm.model.scaffold_44.88	0	2.57	0.86	2	0	0.57	15.068
evm.model.scaffold_44.77	0.53	1.79	1.58	0.84	0.63	0.63	107.994
evm.model.scaffold_44.465	0.33	1.5	1.5	1.17	0.5	1	12.419
evm.model.scaffold_44.428	0.32	1.95	1.78	0.65	0.16	1.14	16.145
evm.model.scaffold_44.429	0.74	1.3	1.87	0.45	0.68	0.96	13.26
evm.model.scaffold_44.90	0.41	1.38	2.07	0.62	0.62	0.9	24.317
evm.model.scaffold_44.241	0	1.64	3.27	0.55	0.55	0	306.458
evm.model.scaffold_44.400	1.26	1.89	0.32	0	1.26	1.26	164.473
evm.model.scaffold_44.372	0	1.78	1.78	0.89	0.22	1.33	179.318
evm.model.scaffold_44.265	0.46	1.85	0.92	0.92	1.38	0.46	18.2
evm.model.scaffold_44.451	1.25	0.25	1.75	1	1	0.75	16.562
evm.model.scaffold_44.286	0.63	1.26	2.53	0.63	0	0.95	43.938
evm.model.scaffold_44.102.1	0.67	1.33	1.78	1.33	0.89	0	19.232
evm.model.scaffold_44.338	0.65	1.64	1.42	0.76	1.09	0.44	15.957
evm.model.scaffold_44.374	0.67	0.67	1.33	0.67	0.67	2	111.309
evm.model.scaffold_44.511	0.62	1.66	1.45	0.21	0.21	1.86	54.591
evm.model.scaffold_44.344	0.46	1.85	1.15	1.85	0	0.69	32.558
evm.model.scaffold_44.309.2	0.87	1.43	1.47	0.9	0.7	0.63	16.284
evm.model.scaffold_44.447	0.35	1.65	0.82	2	0.47	0.71	11.713
evm.model.scaffold_44.131	0.61	1.42	1.32	1.02	0.61	1.02	56.644
evm.model.scaffold_44.464	0.26	2.48	1.04	1.57	0.39	0.26	29.28
evm.model.scaffold_44.54	0.18	2.29	0.88	1.41	0.71	0.53	14.304
evm.model.scaffold_44.39	0.41	1.24	2.28	0.62	0.62	0.83	29.43
evm.model.scaffold_44.461	0	0.96	2.4	0.72	0.72	1.2	23.516
evm.model.scaffold_44.291	0.2	1.6	1.4	1.2	0.2	1.4	22.53
evm.model.scaffold_44.249	1.44	0.48	1.68	1.2	0.72	0.48	83.449
evm.model.scaffold_16.12	0	0.6	0	1.8	0.6	3	106.94
evm.model.scaffold_16.13	0.17	2	1.33	0.83	0.5	1.17	10.734
evm.model.scaffold_16.8	1.21	1.4	1.49	0.65	0.74	0.51	20.662
evm.model.scaffold_64.22	0	1.2	1.6	2	0.4	0.8	24.522
evm.model.scaffold_64.60	2.31	0.46	0.92	0	0.92	1.38	22.79
evm.model.scaffold_64.30	0.46	0	1.38	2.31	0.92	0.92	10.976
evm.model.scaffold_64.38	0	3.5	1	1	0	0.5	29.521
evm.model.scaffold_64.18	0	1.09	0.91	3.09	0	0.91	26.462
evm.model.scaffold_64.13	0.67	0	4	1.33	0	0	35.383
evm.model.scaffold_64.67	1.15	1.28	1.15	0.89	0.64	0.89	10.678
evm.model.scaffold_64.14.2	0.81	1.04	1.73	0.46	0.92	1.04	26.492
evm.model.scaffold_64.21	0.27	1.64	1.64	1.09	0.27	1.09	310.719
evm.model.scaffold_64.3	0.69	1.48	1.77	0.79	0.39	0.89	28.889
evm.model.scaffold_64.75	0.61	1.48	2.17	0.43	0.35	0.96	10.51
evm.model.scaffold_64.37	0.83	1.86	1.03	0.21	1.03	1.03	11.887
evm.model.scaffold_64.6	0.33	1	0.67	2.33	0.33	1.33	78.424
evm.model.scaffold_0.16	0	2	0.57	1.43	0.86	1.14	177.02
evm.model.scaffold_0.40	0.7	1.74	1.33	0.63	0.42	1.19	11.567
evm.model.scaffold_0.64	0.32	1.26	1.26	1.58	1.26	0.32	124.139
evm.model.scaffold_0.61	0.59	1.02	2.2	1.02	1.02	0.15	15.507
evm.model.scaffold_0.39	1.41	0.71	1.76	0.71	0.71	0.71	18.174
evm.model.scaffold_0.63	1.39	1.83	1.39	0.35	0.35	0.7	15.627
evm.model.scaffold_0.9	0	1.6	1.2	1.2	1.2	0.8	11.339
evm.model.scaffold_0.26	0.65	1.64	1.53	0.76	0.33	1.09	11.134
evm.model.scaffold_0.69	0.69	1.92	1.54	0.92	0.46	0.46	11.252
evm.model.scaffold_290.604.1	0.42	1.26	2.79	0.56	0.42	0.56	63.849
evm.model.scaffold_290.20	0.2	2.6	1.6	0.4	0.4	0.8	129.998
evm.model.scaffold_290.237	0.88	1.62	1.85	0.45	0.55	0.65	21.634
evm.model.scaffold_290.495	0.53	2.03	1.41	0.26	0.97	0.79	15.943
evm.model.scaffold_290.629	0.3	1.8	1.8	1.2	0.6	0.3	10.085
evm.model.scaffold_290.511	2.77	0.92	1.85	0	0.46	0	35.71
evm.model.scaffold_290.342	0.7	2.23	0.56	1.12	0.56	0.84	28.416
evm.model.scaffold_290.599	0.67	0.67	2.67	1.33	0	0.67	1203.3
evm.model.scaffold_290.193	0	0.55	0.55	2.73	1.09	1.09	49.799
evm.model.scaffold_290.396	0.55	2.18	2.18	0.55	0	0.55	140.704
evm.model.scaffold_290.570	1.04	1.23	1.86	0.52	0.56	0.78	38.74
evm.model.scaffold_290.545	0.8	2.8	1.2	0	0.4	0.8	15.415
evm.model.scaffold_290.658	0.77	1.42	1.74	0.84	0.52	0.71	27.822
evm.model.scaffold_290.1	0.61	1.59	1.96	0.49	0.49	0.86	16.581
evm.model.scaffold_290.93	1.2	1.37	1.54	0.69	0.17	1.03	14.113
evm.model.scaffold_290.309.1	0	2.1	2.1	0.6	0.9	0.3	108.573
evm.model.scaffold_290.432	0.77	1.35	2.32	0.58	0.19	0.77	20.092
evm.model.scaffold_290.592	0	1.5	0.75	1.5	1.5	0.75	81.768
evm.model.scaffold_290.692	0.29	1.43	1.14	2.57	0	0.57	853.457
evm.model.scaffold_290.454	0.08	0.8	0.72	2.96	0.16	1.28	41.468
evm.model.scaffold_290.395	0.75	1.25	1.75	0.75	0.25	1.25	93.429
evm.model.scaffold_290.213	0.56	1.13	1.88	1.31	0.56	0.56	17.987
evm.model.scaffold_290.350	0.45	1.16	1.52	1.16	0.72	0.99	44.362
evm.model.scaffold_290.461	0.98	1.09	1.53	0.76	0.65	0.98	31.12
evm.model.scaffold_290.708	1.43	1.43	1.71	0.57	0.29	0.57	132.779
evm.model.scaffold_290.17	0	2.25	0.38	0.75	1.13	1.5	10.106
evm.model.scaffold_290.471	1	1	1.8	1	0.6	0.6	28.483
evm.model.scaffold_290.588	0	2	1.67	2	0	0.33	17.381
evm.model.scaffold_290.318	0.92	1.25	1.25	0.83	1.25	0.5	17.903
evm.model.scaffold_290.347	1.2	1.71	1.46	0.6	0.51	0.51	17.055
evm.model.scaffold_290.484	0.47	1.18	2.47	0.82	0.24	0.82	13.843
evm.model.scaffold_290.364.2	0.22	1.78	1.78	0.44	0.44	1.33	218.62
evm.model.scaffold_290.190	0.55	1.09	2.18	1.64	0.36	0.18	178.038
evm.model.scaffold_290.453	0.17	1.17	1.5	1.5	0.5	1.17	51.487
evm.model.scaffold_290.641	0.42	1.53	1.81	1.12	0.7	0.42	38.289
evm.model.scaffold_290.344	0	1.09	0.91	3.27	0.18	0.55	79.582
evm.model.scaffold_290.584	0.78	0.78	1.57	0.78	1.04	1.04	80.291
evm.model.scaffold_290.650	0.6	2.2	1.8	0.8	0.4	0.2	144.578
evm.model.scaffold_290.447_evm.model.scaffold_290.448	0.16	1.84	1.52	1.28	0.48	0.72	20.26
evm.model.scaffold_290.493	0.6	2.06	1.2	0.51	1.03	0.6	15.751
evm.model.scaffold_290.485	1.03	2.07	1.45	0.21	0.83	0.41	23.577
evm.model.scaffold_290.151.3	1.02	1.9	1.46	0.59	0.73	0.29	17.569
evm.model.scaffold_290.201	1	0.67	2.67	1	0.67	0	44.922
evm.model.scaffold_290.153.3	0.94	1.5	1.69	0.38	0.94	0.56	16.522
evm.model.scaffold_290.646	1.22	1.83	1.22	0.56	0.28	0.89	25.832
evm.model.scaffold_290.91	1.41	1.76	1.06	0.71	0	1.06	84.755
evm.model.scaffold_290.125	0.96	1.07	1.29	1.29	0.75	0.64	23.118
evm.model.scaffold_290.5	1	1	0	1	1	2	22.965
evm.model.scaffold_290.31	1.6	0.8	1.2	0.8	1.2	0.4	57.05
evm.model.scaffold_290.303	0.53	1.6	0.93	1.73	0.27	0.93	14.913
evm.model.scaffold_290.605	0.67	1.33	1	2	0.33	0.67	80.123
evm.model.scaffold_290.690	0.55	2.18	1.64	1.09	0.55	0	22.314
evm.model.scaffold_290.361	0.78	2.09	1.3	0.52	1.04	0.26	405.143
evm.model.scaffold_290.704	1.09	1.64	0.55	1.64	0.55	0.55	431.867
evm.model.scaffold_290.158	0.83	1.62	1.98	0.57	0.37	0.63	30.203
evm.model.scaffold_290.564	1.03	1.45	1.24	1.03	0.62	0.62	26.999
evm.model.scaffold_290.662	0.86	1.54	1.37	0.51	0.51	1.2	17.001
evm.model.scaffold_290.669	0.4	1.6	1.4	1.4	0.6	0.6	292.54
evm.model.scaffold_290.433	1.2	0.8	1.2	0.4	0	2.4	35.442
evm.model.scaffold_290.261	0.33	1.22	1.33	1.44	0.67	1	10.752
evm.model.scaffold_290.196	0.88	1.02	1.32	1.32	1.02	0.44	19.951
[truncated: 7,173 more rows]

## Sheet: Ile
Gene	AUU	AUC	AUA	RPKM
evm.model.scaffold_30.17	1.91	0.82	0.27	32.211
evm.model.scaffold_30.74	1.6	0.2	1.2	35.828
evm.model.scaffold_30.18	1.29	0.43	1.29	13.106
evm.model.scaffold_30.35	1.5	0.9	0.6	19.755
evm.model.scaffold_30.6	1.43	0.78	0.78	10.274
evm.model.scaffold_30.99.1	2.18	0.55	0.27	37.53
evm.model.scaffold_30.15	0.86	0.43	1.71	28.135
evm.model.scaffold_30.57	1.5	0.6	0.9	23.597
evm.model.scaffold_30.58	1.77	0.41	0.82	16.215
evm.model.scaffold_30.13	1.71	0.96	0.32	27.243
evm.model.scaffold_30.16	2	0	1	34.685
evm.model.scaffold_30.50	1.54	0.62	0.85	29.624
evm.model.scaffold_185.490	1.33	1.33	0.33	37.337
evm.model.scaffold_185.428	1.32	0.6	1.08	10.141
evm.model.scaffold_185.496	1.33	0.83	0.83	19.285
evm.model.scaffold_185.534	1.44	0.78	0.78	35.458
evm.model.scaffold_185.340.1	1.65	0.9	0.45	75.121
evm.model.scaffold_185.28	1.5	0	1.5	48.94
evm.model.scaffold_185.262	1.93	0.64	0.43	17.025
evm.model.scaffold_185.32	0	3	0	62.511
evm.model.scaffold_185.29	1.39	0.8	0.8	27.928
evm.model.scaffold_185.117	0.86	1.43	0.71	31.362
evm.model.scaffold_185.325	1.66	0.62	0.72	133.24
evm.model.scaffold_185.376	1.96	0.39	0.65	16.171
evm.model.scaffold_185.518	1.45	0.73	0.82	14.597
evm.model.scaffold_185.307	1.91	0	1.09	11.589
evm.model.scaffold_185.82	1.42	0.79	0.79	50.616
evm.model.scaffold_185.129	0.6	2.1	0.3	36.267
evm.model.scaffold_185.34	2.18	0.55	0.27	44.369
evm.model.scaffold_185.115	0.43	1.71	0.86	11.34
evm.model.scaffold_185.514	1.44	0.56	1	495.985
evm.model.scaffold_185.255	1.5	1	0.5	38.959
evm.model.scaffold_185.384	2	1	0	10.698
evm.model.scaffold_185.301	1.36	0.82	0.82	32.282
evm.model.scaffold_185.541	2	0.5	0.5	128.345
evm.model.scaffold_185.48	1.41	0.88	0.71	60.84
evm.model.scaffold_185.163	1.56	0.56	0.89	10.747
evm.model.scaffold_185.35	0.27	2.73	0	431.273
evm.model.scaffold_185.310	1.09	0.55	1.36	57.041
evm.model.scaffold_185.323	1.57	0.65	0.78	22.159
evm.model.scaffold_185.293	1.23	0.82	0.95	65.669
evm.model.scaffold_185.482	1.5	1.5	0	65.384
evm.model.scaffold_185.368	0.69	1.15	1.15	10.916
evm.model.scaffold_185.407	1.92	0.42	0.67	36.364
evm.model.scaffold_185.110	1.64	1.36	0	27.522
evm.model.scaffold_185.104	2	0.4	0.6	44.342
evm.model.scaffold_185.59	1.71	0.21	1.07	21.152
evm.model.scaffold_185.391	1.4	0.8	0.8	57.311
evm.model.scaffold_185.87	1.84	0.39	0.77	93.378
evm.model.scaffold_185.268	1.56	0.84	0.6	93.918
evm.model.scaffold_185.241	1	0.5	1.5	81.741
evm.model.scaffold_185.337_evm.model.scaffold_185.338	1.5	0	1.5	78.859
evm.model.scaffold_185.158	1.33	1.67	0	13.521
evm.model.scaffold_185.156	0.25	1	1.75	50.563
evm.model.scaffold_185.244	1.64	0.45	0.91	18.651
evm.model.scaffold_185.308	0.38	1.88	0.75	16.492
evm.model.scaffold_185.73	1.64	0.36	1	10.218
evm.model.scaffold_185.275	1.85	0	1.15	68.167
evm.model.scaffold_185.330	1.8	0.26	0.94	52.762
evm.model.scaffold_185.250	1.7	0.7	0.6	38.324
evm.model.scaffold_185.61	2.37	0.32	0.32	19.412
evm.model.scaffold_185.317	1.22	1.03	0.75	24.873
evm.model.scaffold_185.51	1.8	0.6	0.6	19.698
evm.model.scaffold_185.401	1.29	1.29	0.43	82.244
evm.model.scaffold_185.114	1.09	0.73	1.18	35.486
evm.model.scaffold_185.131	1.75	0.75	0.5	34.4
evm.model.scaffold_185.26	1.5	0.6	0.9	17.161
evm.model.scaffold_185.456	1.77	0.41	0.82	30.902
evm.model.scaffold_185.458	1.15	0.92	0.92	117.16
evm.model.scaffold_185.238	1.34	1.18	0.47	17.724
evm.model.scaffold_185.15	1.06	1.94	0	110.75
evm.model.scaffold_185.89	1.75	1	0.25	41.466
evm.model.scaffold_185.159	1.36	1.09	0.55	28.399
evm.model.scaffold_185.361	1.69	0.75	0.56	20.468
evm.model.scaffold_185.313	1.38	0.69	0.92	26.906
evm.model.scaffold_185.491	1.64	0.82	0.55	30.355
evm.model.scaffold_185.277	1.97	0.62	0.41	13.972
evm.model.scaffold_185.504	0.96	0.43	1.61	59.692
evm.model.scaffold_185.96	1.5	1.5	0	15.33
evm.model.scaffold_185.388	1.21	0.64	1.14	16.82
evm.model.scaffold_185.78	1.5	1.5	0	23.8
evm.model.scaffold_185.322	0.5	2	0.5	14.275
evm.model.scaffold_185.157	1.2	1.2	0.6	21.946
evm.model.scaffold_185.79	1.17	1.57	0.26	19.693
evm.model.scaffold_185.94	1.1	1	0.9	12.13
evm.model.scaffold_185.121	2.05	0.27	0.68	12.528
evm.model.scaffold_185.134	2.33	0.33	0.33	42.261
evm.model.scaffold_185.66_evm.model.scaffold_185.67	1.33	0.56	1.11	30.448
evm.model.scaffold_185.374	1	2	0	16.648
evm.model.scaffold_185.77	1.14	0.43	1.43	16.909
evm.model.scaffold_185.372	2.25	0.75	0	29.733
evm.model.scaffold_185.102	2.25	0.38	0.38	52.456
evm.model.scaffold_185.50	1.38	1.15	0.46	114.399
evm.model.scaffold_185.154	1.5	0.63	0.87	15.296
evm.model.scaffold_185.133	1.21	0.93	0.86	362.883
evm.model.scaffold_185.197	2.03	0.48	0.48	14.208
evm.model.scaffold_185.109	1.15	0.92	0.92	46.076
evm.model.scaffold_185.72	1.32	1.15	0.53	21.725
evm.model.scaffold_185.379	1.33	1	0.67	53.558
evm.model.scaffold_185.360	2.18	0.27	0.55	40.964
evm.model.scaffold_185.57	0.95	0.95	1.11	10.458
evm.model.scaffold_185.230	0.75	0.75	1.5	17.862
evm.model.scaffold_185.167	1.82	0.47	0.71	41.775
evm.model.scaffold_185.44	1.5	0.84	0.66	28.945
evm.model.scaffold_185.472	1	1	1	130.61
evm.model.scaffold_185.137	0.75	1.5	0.75	27.247
evm.model.scaffold_185.383	0.86	0.43	1.71	12.881
evm.model.scaffold_185.461	1	1.2	0.8	15.547
evm.model.scaffold_185.291	1.14	0.83	1.03	98.265
evm.model.scaffold_185.261	1.5	0.9	0.6	76.685
evm.model.scaffold_185.75	1.13	1.69	0.19	38.169
evm.model.scaffold_185.506	1.71	1.07	0.21	10.626
evm.model.scaffold_185.248	2.14	0.43	0.43	123.572
evm.model.scaffold_185.433	1.46	0.81	0.73	12.345
evm.model.scaffold_185.118	1.3	0.5	1.2	41.36
evm.model.scaffold_185.112	0.43	1.29	1.29	21.386
evm.model.scaffold_185.60	1.88	0	1.13	30.637
evm.model.scaffold_185.520	2.25	0.75	0	17.605
evm.model.scaffold_185.263	1.09	1.09	0.82	14.407
evm.model.scaffold_185.231	2.25	0.75	0	32.412
evm.model.scaffold_185.292	1.42	0.95	0.63	30.229
evm.model.scaffold_185.334	1.38	0.23	1.38	17.328
evm.model.scaffold_185.127	1.06	1.35	0.58	21.01
evm.model.scaffold_185.199	1.2	0.9	0.9	16.383
evm.model.scaffold_185.53	1.59	0.84	0.58	49.308
evm.model.scaffold_185.276	1.5	1.07	0.43	21.515
evm.model.scaffold_185.408	1.44	0.84	0.72	109.001
evm.model.scaffold_185.41	1.65	0.3	1.05	10.716
evm.model.scaffold_185.395	1	1.5	0.5	39.591
evm.model.scaffold_185.287	1.85	0.46	0.69	10.094
evm.model.scaffold_185.356	1.45	0.69	0.85	10.626
evm.model.scaffold_185.253	0	1.5	1.5	40.422
evm.model.scaffold_185.470	0.27	2.18	0.55	65.437
evm.model.scaffold_185.435	2.1	0.3	0.6	76.754
evm.model.scaffold_185.380	0.95	1.64	0.41	262.018
evm.model.scaffold_185.168	0	2.81	0.19	40.086
evm.model.scaffold_185.321	1.39	0.54	1.07	214.92
evm.model.scaffold_185.52	0	3	0	70.747
evm.model.scaffold_185.161	1.61	0.95	0.44	33.886
evm.model.scaffold_185.309	1.2	1.08	0.72	35.62
evm.model.scaffold_185.389	1.5	0.94	0.56	10.81
evm.model.scaffold_185.519	0.88	1	1.13	60.458
evm.model.scaffold_185.455	1.75	0.25	1	82.304
evm.model.scaffold_185.311	0.75	1.5	0.75	116.561
evm.model.scaffold_185.91	0.56	1.13	1.31	59.749
evm.model.scaffold_185.402	1	1.67	0.33	10.325
evm.model.scaffold_185.49	1.59	0.67	0.73	50.404
evm.model.scaffold_185.62	1.3	1.43	0.26	20.32
evm.model.scaffold_185.359	0.88	1.94	0.18	29.785
evm.model.scaffold_185.316	0.92	0.69	1.38	62.151
evm.model.scaffold_185.545	1.5	1.17	0.33	27.137
evm.model.scaffold_185.175	1.09	1	0.91	14.295
evm.model.scaffold_185.103	1.68	0.72	0.6	34.875
evm.model.scaffold_185.362.1	1.5	0.5	1	38.966
evm.model.scaffold_185.303	1.24	0.72	1.03	47.006
evm.model.scaffold_185.457	1.41	0.71	0.88	48.843
evm.model.scaffold_185.355	1.67	0.67	0.67	13.248
evm.model.scaffold_185.370	1.36	0.82	0.82	302.801
evm.model.scaffold_185.56	1.17	1.22	0.61	58.435
evm.model.scaffold_185.278	0.33	1.5	1.17	90.085
evm.model.scaffold_35.30	2	0.2	0.8	10.47
evm.model.scaffold_35.873	1.41	0.53	1.06	20.48
evm.model.scaffold_35.1151	2.4	0	0.6	23.605
evm.model.scaffold_35.449	1.24	0.53	1.24	13.498
evm.model.scaffold_35.1079	2.04	0.32	0.64	14.244
evm.model.scaffold_35.1185	1.93	1.07	0	12.407
evm.model.scaffold_35.369	1.24	0.53	1.24	12.687
evm.model.scaffold_35.957	1.8	1.2	0	10.653
evm.model.scaffold_35.177	1.6	0.6	0.8	16.177
evm.model.scaffold_35.834	1.86	0.86	0.29	54.159
evm.model.scaffold_35.1136	1.57	1.04	0.39	10.718
evm.model.scaffold_35.958	1.4	0.6	1	26.727
evm.model.scaffold_35.113	1.3	0.65	1.04	11.626
evm.model.scaffold_35.383	1.15	1.04	0.81	10.285
evm.model.scaffold_35.1090	0	1	2	15.366
evm.model.scaffold_35.659	0.75	1.13	1.13	29.991
evm.model.scaffold_35.522	2	0.6	0.4	57.863
evm.model.scaffold_35.477	1.8	0.34	0.86	13.252
evm.model.scaffold_35.404	1.71	0.86	0.43	65.319
evm.model.scaffold_35.933	0.65	1.57	0.78	57.932
evm.model.scaffold_35.168	1.5	0.6	0.9	29.41
evm.model.scaffold_35.227	3	0	0	59.361
evm.model.scaffold_35.507	1.8	0.8	0.4	12.967
evm.model.scaffold_35.907	1.92	0.5	0.58	21.188
evm.model.scaffold_35.338	0.9	0.6	1.5	13.344
evm.model.scaffold_35.105	2.25	0.38	0.38	30.426
evm.model.scaffold_35.1046	1.36	0.68	0.95	26.158
evm.model.scaffold_35.542	1.29	1.07	0.64	11.244
evm.model.scaffold_35.1001	1.18	0.96	0.86	10.697
evm.model.scaffold_35.974	0.6	1.2	1.2	95.771
evm.model.scaffold_35.197	1.63	0.56	0.81	222.244
evm.model.scaffold_35.239	1.69	0.54	0.77	21.896
evm.model.scaffold_35.172	1.13	1.5	0.38	19.062
evm.model.scaffold_35.305	1.7	0.45	0.85	20.07
evm.model.scaffold_35.478	1.4	0.4	1.2	13.988
evm.model.scaffold_35.820	0.82	1.91	0.27	39.067
evm.model.scaffold_35.1014	1.29	0.43	1.29	10.294
evm.model.scaffold_35.188	0.69	0.92	1.38	65.118
evm.model.scaffold_35.586	0.82	1.91	0.27	137.131
evm.model.scaffold_35.747	1.8	0.43	0.77	15.079
evm.model.scaffold_35.510	1.86	0.57	0.57	28.678
evm.model.scaffold_35.100	1.33	0.67	1	26.402
evm.model.scaffold_35.578	1	1	1	29.507
evm.model.scaffold_35.234	1.54	0.43	1.03	16.626
evm.model.scaffold_35.559	2	0	1	10.713
evm.model.scaffold_35.641	1.5	0.6	0.9	10.418
evm.model.scaffold_35.1028	0	3	0	45.839
evm.model.scaffold_35.670	0.9	1.5	0.6	106.343
evm.model.scaffold_35.420	1.59	1.06	0.35	10.908
evm.model.scaffold_35.902	1.27	1.27	0.46	18.403
evm.model.scaffold_35.407	1.8	1.2	0	34.471
evm.model.scaffold_35.620	0.5	1.5	1	20.129
evm.model.scaffold_35.1058	1	0.63	1.38	10.519
evm.model.scaffold_35.679	1.03	1.13	0.84	33.799
evm.model.scaffold_35.626	2.33	0.33	0.33	36.812
evm.model.scaffold_35.694.1	0	1.2	1.8	449.439
evm.model.scaffold_35.784_evm.model.scaffold_35.785	1.33	0.63	1.05	54.746
evm.model.scaffold_35.286	1.31	0.92	0.77	26.552
evm.model.scaffold_35.421	1.71	0.43	0.86	28.23
evm.model.scaffold_35.236	1	1	1	22.975
evm.model.scaffold_35.757	1.5	0.55	0.95	39.103
evm.model.scaffold_35.752	0.89	0.67	1.44	15.556
evm.model.scaffold_35.663	1.93	0.43	0.64	21.519
evm.model.scaffold_35.397	1	1.67	0.33	41.25
evm.model.scaffold_35.564	3	0	0	60.403
evm.model.scaffold_35.245	1.59	0.71	0.71	19.281
evm.model.scaffold_35.1022.2	1.5	1.17	0.33	11.43
evm.model.scaffold_35.618	1.34	0.72	0.93	27.205
evm.model.scaffold_35.575	1.6	0.4	1	103.766
evm.model.scaffold_35.909.2	2.17	0.5	0.33	37.948
evm.model.scaffold_35.743	1.46	0.73	0.8	20.37
evm.model.scaffold_35.1019	2	0	1	10.482
evm.model.scaffold_35.321	1	0.75	1.25	11.144
evm.model.scaffold_35.881	1.33	0.83	0.83	15.795
evm.model.scaffold_35.269	1.2	0.6	1.2	30.54
evm.model.scaffold_35.592	1.56	0.75	0.69	13.789
evm.model.scaffold_35.499	2.18	0.55	0.27	130.235
evm.model.scaffold_35.711	1.29	1.14	0.57	28.235
evm.model.scaffold_35.1072	1.5	0.45	1.05	26.84
evm.model.scaffold_35.466	1.5	0.66	0.84	10.31
evm.model.scaffold_35.498	0.67	2	0.33	12.19
evm.model.scaffold_35.668	0.6	2.4	0	19.024
evm.model.scaffold_35.729	1.5	0.5	1	12.627
evm.model.scaffold_35.894	1.41	0.88	0.71	39.09
evm.model.scaffold_35.751	1.2	0.4	1.4	13.856
evm.model.scaffold_35.792	1.33	0.67	1	11.286
evm.model.scaffold_35.520	1.5	1.13	0.38	23.663
evm.model.scaffold_35.328	1.74	0.47	0.79	32.118
evm.model.scaffold_35.758	1.76	0.71	0.53	15.173
evm.model.scaffold_35.536	1.8	0.9	0.3	20.052
evm.model.scaffold_35.547	0.94	1.59	0.47	29.957
evm.model.scaffold_35.823	1.2	0.6	1.2	27.735
evm.model.scaffold_35.744	1.69	0.38	0.94	28.784
evm.model.scaffold_35.252	2	0.4	0.6	21.398
evm.model.scaffold_35.419	1.06	1.41	0.53	58.566
evm.model.scaffold_35.231	0.83	1.17	1	11.08
evm.model.scaffold_35.633	1.29	1.29	0.43	198.451
evm.model.scaffold_35.765	1.11	1.89	0	55.159
evm.model.scaffold_35.39	2.06	0.69	0.26	12.673
evm.model.scaffold_35.150	1.07	1.07	0.86	52.101
evm.model.scaffold_35.88	1.2	1.4	0.4	11.861
evm.model.scaffold_35.311	0.96	0.72	1.32	26.493
evm.model.scaffold_35.372	1.05	0.75	1.2	22.755
evm.model.scaffold_35.67	0.43	1.71	0.86	43.82
evm.model.scaffold_35.87	2.45	0.27	0.27	21.89
evm.model.scaffold_35.129	1.32	0.97	0.71	19.585
evm.model.scaffold_35.952	0.96	0.36	1.68	10.244
evm.model.scaffold_35.335.1	1.14	1	0.86	14.852
evm.model.scaffold_35.355	1.5	0	1.5	15.388
evm.model.scaffold_35.198	1.71	0.64	0.64	96.011
evm.model.scaffold_35.764	1.11	1.89	0	27.787
evm.model.scaffold_35.99	1.25	0.75	1	39.585
evm.model.scaffold_35.135	1.42	0.79	0.79	24.661
evm.model.scaffold_35.793	1.8	0	1.2	78.262
evm.model.scaffold_35.84	1.2	0.6	1.2	19.373
evm.model.scaffold_35.833	1.4	0.8	0.8	24.444
evm.model.scaffold_35.488	0	0	0	26.589
evm.model.scaffold_35.414	1.85	0.23	0.92	25.675
evm.model.scaffold_35.629	1.5	0.88	0.62	128.702
evm.model.scaffold_35.461	1.88	0.75	0.38	49.049
evm.model.scaffold_35.1102	1.4	0.8	0.8	11.514
evm.model.scaffold_35.85	1.67	0.75	0.58	19.896
evm.model.scaffold_35.1070	1.5	0.45	1.05	13.42
evm.model.scaffold_35.924	1.29	0.64	1.07	32.201
evm.model.scaffold_35.755	0.43	1.71	0.86	20.317
evm.model.scaffold_35.408	1.62	0.92	0.46	98.672
evm.model.scaffold_35.181	0.55	2.45	0	151.572
evm.model.scaffold_35.1150	1.93	0.54	0.54	15.551
evm.model.scaffold_35.3	1.38	0.88	0.75	110.394
evm.model.scaffold_35.1171	1.42	0.95	0.63	13.717
evm.model.scaffold_35.971	1.65	1.35	0	37.35
evm.model.scaffold_35.737	1.71	0.43	0.86	101.386
evm.model.scaffold_35.115	1.45	0.66	0.89	17.022
evm.model.scaffold_35.8	1.5	0.75	0.75	17.901
evm.model.scaffold_35.24	1.26	1.06	0.68	29.406
evm.model.scaffold_35.801	1.47	0.98	0.55	35.834
evm.model.scaffold_35.961	1.57	0.57	0.86	42.578
evm.model.scaffold_35.762	1.33	1.11	0.56	50.784
evm.model.scaffold_35.230	1.71	0.6	0.69	20.365
evm.model.scaffold_35.1045	1.38	1.38	0.23	13.349
evm.model.scaffold_35.453	1.2	1.2	0.6	39.532
evm.model.scaffold_35.409	1.64	1.09	0.27	21.856
evm.model.scaffold_35.2	1.5	0.35	1.15	23.1
evm.model.scaffold_35.825	1.39	0.54	1.07	35.289
evm.model.scaffold_35.395	0.25	2.25	0.5	139.597
evm.model.scaffold_35.925	1.69	0.5	0.81	11.128
evm.model.scaffold_35.81	1.52	0.46	1.01	11.914
evm.model.scaffold_35.794	1.75	0.5	0.75	20.273
evm.model.scaffold_35.572	1.35	0.6	1.05	28.689
evm.model.scaffold_35.317	1.36	1.09	0.55	26.793
evm.model.scaffold_35.666	1.38	1.27	0.35	32.23
evm.model.scaffold_35.722	0.3	2.4	0.3	11.051
evm.model.scaffold_35.258	1.29	0.64	1.07	11.751
evm.model.scaffold_35.804	1.73	0.23	1.04	10.971
evm.model.scaffold_35.459	1.33	1.33	0.33	940.174
evm.model.scaffold_35.350	1.74	0.7	0.56	13.767
evm.model.scaffold_35.194	1.71	0.43	0.86	144.226
evm.model.scaffold_35.750	1.58	0.47	0.95	69.903
evm.model.scaffold_35.233	1.62	0.23	1.15	17.424
evm.model.scaffold_35.687	0.87	0.87	1.27	13.163
evm.model.scaffold_35.742	1.31	0.81	0.88	16.04
evm.model.scaffold_35.257	1	2	0	25.399
evm.model.scaffold_35.90	1.29	1.29	0.43	11.141
evm.model.scaffold_35.1055	1.67	1	0.33	11.093
evm.model.scaffold_35.271	0.94	0.94	1.13	34.085
evm.model.scaffold_35.332	2.29	0.43	0.29	21.79
evm.model.scaffold_35.728	1.67	0.67	0.67	47.646
evm.model.scaffold_35.625	1.16	0.39	1.45	32.752
evm.model.scaffold_35.1000	1.5	0.9	0.6	30.145
evm.model.scaffold_35.658	1	0.8	1.2	48.141
evm.model.scaffold_35.184	1.94	0.58	0.48	13.676
evm.model.scaffold_35.735	1.8	1.2	0	13.78
evm.model.scaffold_35.726	1.57	0.55	0.89	19.984
evm.model.scaffold_35.1083	1.5	1.25	0.25	33.221
evm.model.scaffold_35.106	1.38	0.69	0.92	23.633
evm.model.scaffold_35.56.2	1.2	1.05	0.75	74.286
evm.model.scaffold_35.1117	1.5	0.5	1	16.437
evm.model.scaffold_35.1039	1.58	0.67	0.75	12.692
evm.model.scaffold_35.48	1.11	0.86	1.03	14.012
evm.model.scaffold_35.441	1.06	1.59	0.35	11.449
evm.model.scaffold_35.169	0.78	1.57	0.65	13.794
evm.model.scaffold_35.526	1.88	0.75	0.38	19.637
evm.model.scaffold_35.1115	1.5	0.91	0.59	13.988
evm.model.scaffold_35.201	1.19	0.85	0.96	26.046
evm.model.scaffold_35.824	1.36	0.27	1.36	25.178
evm.model.scaffold_35.406	1.36	1.09	0.55	992.1
evm.model.scaffold_35.33	1.5	0.5	1	20.203
evm.model.scaffold_35.218_evm.model.scaffold_35.219	1.5	0.75	0.75	30.04
evm.model.scaffold_35.644	1.56	0.72	0.72	11.609
evm.model.scaffold_35.216	0.38	2.25	0.38	81.044
evm.model.scaffold_35.316	0.95	1.74	0.32	312.519
evm.model.scaffold_35.485	0.5	1.5	1	14.325
evm.model.scaffold_35.570.1	1.89	0.63	0.47	10.318
evm.model.scaffold_35.591	1.85	0.46	0.69	17.699
evm.model.scaffold_35.970	1.64	0.55	0.82	18.45
evm.model.scaffold_35.681	1.5	0.98	0.52	30.303
evm.model.scaffold_35.487	1.33	0	1.67	20.584
evm.model.scaffold_35.127	1.8	0.3	0.9	65.356
evm.model.scaffold_35.1003	0	3	0	14.642
evm.model.scaffold_35.504	0.53	1.41	1.06	11.131
evm.model.scaffold_35.790	1.5	1.5	0	353.399
evm.model.scaffold_35.325	1.29	0.51	1.2	36.79
evm.model.scaffold_35.589	1.95	0.32	0.73	10.42
evm.model.scaffold_35.327	1.36	1.64	0	42.288
evm.model.scaffold_35.1125	1.5	1	0.5	48.103
evm.model.scaffold_35.182	1.56	0.72	0.72	13.078
evm.model.scaffold_35.467	0.95	1.5	0.55	28.382
evm.model.scaffold_35.678	1.5	0.5	1	15.745
evm.model.scaffold_35.807	1.83	0.83	0.33	24.336
evm.model.scaffold_35.693	1.37	0.65	0.98	14.772
evm.model.scaffold_35.294	1.8	0.3	0.9	30.396
evm.model.scaffold_35.275	1.5	0.78	0.72	13.121
evm.model.scaffold_35.345	1.29	0	1.71	25.317
evm.model.scaffold_35.738	1.31	0.75	0.94	20.535
evm.model.scaffold_35.1004	1.69	0.56	0.75	42.085
evm.model.scaffold_35.313	2	0.67	0.33	22.351
evm.model.scaffold_35.1170	1.29	0.86	0.86	3789.21
evm.model.scaffold_35.333.1	1.16	1.16	0.68	12.394
evm.model.scaffold_35.208	1.13	1.22	0.66	20.546
evm.model.scaffold_35.199	1.88	1.13	0	15.019
evm.model.scaffold_35.246	1.5	1.25	0.25	10.598
evm.model.scaffold_35.1159	0.79	1.03	1.18	61.18
evm.model.scaffold_35.207	0.6	2.4	0	15.054
evm.model.scaffold_35.405	1.93	0.43	0.64	24.1
evm.model.scaffold_35.125	3	0	0	70.93
evm.model.scaffold_35.791	0.6	2.4	0	700.848
evm.model.scaffold_35.228	1.27	0.46	1.27	112.026
evm.model.scaffold_35.425	1	1.67	0.33	48.049
evm.model.scaffold_35.91	1.31	1.08	0.62	50.486
evm.model.scaffold_35.174	1.25	1.13	0.63	80.143
evm.model.scaffold_35.519	1.25	0.75	1	15.507
evm.model.scaffold_35.746	1.4	0.7	0.9	10.353
evm.model.scaffold_35.563	2.45	0	0.55	19.394
evm.model.scaffold_35.356	1.7	0.73	0.57	14.122
evm.model.scaffold_35.966	1.06	0.71	1.24	10.274
evm.model.scaffold_35.75.1	3	0	0	426.244
evm.model.scaffold_35.426	1.8	1.2	0	29.212
evm.model.scaffold_35.238	1.34	0.72	0.93	40.175
evm.model.scaffold_35.200	1.71	0.21	1.07	32.317
evm.model.scaffold_35.173	1.2	1.4	0.4	21.492
evm.model.scaffold_35.810	1.2	0.82	0.98	11.94
evm.model.scaffold_35.14	1.41	1.06	0.53	15.391
evm.model.scaffold_35.685_evm.model.scaffold_35.686	0.95	0.8	1.24	38.301
evm.model.scaffold_35.866	1.5	0.64	0.86	49.295
evm.model.scaffold_35.178	1.07	0.43	1.5	15.206
evm.model.scaffold_35.223	1.66	0.39	0.95	17.391
evm.model.scaffold_35.1017	0.92	1.73	0.35	15.147
evm.model.scaffold_35.375	1	2	0	15.822
evm.model.scaffold_35.7	1.59	0.42	0.98	14.251
evm.model.scaffold_35.1140	1.8	0.6	0.6	24.006
evm.model.scaffold_35.1080	1.6	1.2	0.2	20.52
evm.model.scaffold_35.1086	1.5	0.9	0.6	20.631
evm.model.scaffold_35.77	1.78	0.56	0.66	13.866
evm.model.scaffold_35.220	0.75	0.9	1.35	31.783
evm.model.scaffold_35.1002	1.35	0.6	1.05	14.561
evm.model.scaffold_35.1099	1.5	0.5	1	17.096
evm.model.scaffold_99.54	1.44	0.84	0.72	73.997
evm.model.scaffold_99.58	1.46	0.69	0.85	10.568
evm.model.scaffold_99.21	1.29	0.43	1.29	16.161
evm.model.scaffold_99.65	2.7	0.3	0	25.399
evm.model.scaffold_99.9	1.31	1.13	0.56	621.767
evm.model.scaffold_99.8	2.33	0.17	0.5	19.578
evm.model.scaffold_99.57	0.78	1.43	0.78	97.068
evm.model.scaffold_99.79	1.2	0.9	0.9	20.934
evm.model.scaffold_99.37	0.6	1.8	0.6	44.432
evm.model.scaffold_99.55	0.86	0.43	1.71	35.357
evm.model.scaffold_99.51	1.29	1.5	0.21	349.362
evm.model.scaffold_99.28	1.13	0.75	1.13	42.183
evm.model.scaffold_99.56	1.62	0.92	0.46	60.022
evm.model.scaffold_99.75	1	0.6	1.4	26.374
evm.model.scaffold_99.31	1.29	1.29	0.43	83.172
evm.model.scaffold_99.36	1.13	1.69	0.19	32.282
evm.model.scaffold_99.29	2	0	1	23.945
evm.model.scaffold_99.78	1.67	0.5	0.83	41.444
evm.model.scaffold_99.30	1.5	0.5	1	57.475
evm.model.scaffold_99.10	1.3	0.91	0.78	19.497
evm.model.scaffold_99.73	0.78	1.33	0.89	27.479
evm.model.scaffold_99.67	1.5	0.75	0.75	773.174
evm.model.scaffold_99.60	1.5	1	0.5	10.398
evm.model.scaffold_99.34	0.55	1.09	1.36	18.124
evm.model.scaffold_99.22	1.56	0.96	0.48	10.955
evm.model.scaffold_311.9	0.88	0.71	1.41	19.312
evm.model.scaffold_311.4	1.41	0.53	1.06	13.153
evm.model.scaffold_311.5	1.58	0.55	0.87	12.807
evm.model.scaffold_334.7	2	1	0	60.994
evm.model.scaffold_375.676	1	1.33	0.67	10.085
evm.model.scaffold_375.111	0.82	1.91	0.27	325.665
evm.model.scaffold_375.101_evm.model.scaffold_375.102	1.42	1	0.58	18.39
evm.model.scaffold_375.107	1.13	1.13	0.75	36.181
evm.model.scaffold_375.759	2	1	0	22.418
evm.model.scaffold_375.113	0.6	1.8	0.6	22.937
evm.model.scaffold_375.171	1.8	0	1.2	40.026
evm.model.scaffold_375.122	1.64	1.09	0.27	32.527
evm.model.scaffold_375.779	1.2	0.3	1.5	10.642
evm.model.scaffold_375.360	1.46	0.62	0.92	20.668
evm.model.scaffold_375.679	1.46	0.6	0.94	12.236
evm.model.scaffold_375.32	1.07	1	0.93	14.443
evm.model.scaffold_375.731	1.67	0.33	1	16.074
evm.model.scaffold_375.64.2	1.36	1.09	0.55	35.114
evm.model.scaffold_375.575	1.36	1.09	0.55	25.937
evm.model.scaffold_375.417	1	1.11	0.89	31.738
evm.model.scaffold_375.774	0.86	1.71	0.43	16.063
evm.model.scaffold_375.536	0	1.8	1.2	54.5
evm.model.scaffold_375.364	0.21	1.29	1.5	22.707
evm.model.scaffold_375.714	0.5	2	0.5	591.418
evm.model.scaffold_375.40	0	2.25	0.75	29.023
evm.model.scaffold_375.229	1.36	0.27	1.36	15.239
evm.model.scaffold_375.314	1.36	0.55	1.09	10.1
evm.model.scaffold_375.290	1.36	1.36	0.27	16.758
evm.model.scaffold_375.215	0.75	1.88	0.38	17.304
evm.model.scaffold_375.527.1	1.13	0.94	0.94	20.651
evm.model.scaffold_375.233	2	0.33	0.67	28.337
evm.model.scaffold_375.168	1.57	0.48	0.95	26.953
evm.model.scaffold_375.207	1.85	0.92	0.23	42.513
evm.model.scaffold_375.155	1.5	0.71	0.79	12.115
evm.model.scaffold_375.240	0.86	1.71	0.43	30.684
evm.model.scaffold_375.603	1.5	0.75	0.75	41.854
evm.model.scaffold_375.65	1.98	0.42	0.6	12.927
evm.model.scaffold_375.499	1.88	1.13	0	94.088
evm.model.scaffold_375.217	1.25	1.25	0.5	30.632
evm.model.scaffold_375.656	0.83	1.45	0.72	143.972
evm.model.scaffold_375.124	0.75	2.25	0	76.636
evm.model.scaffold_375.202	1.35	0.9	0.75	15.195
evm.model.scaffold_375.237	1.44	0.56	1	50.734
evm.model.scaffold_375.46	1.71	0.86	0.43	53.708
evm.model.scaffold_375.58	1.59	0.53	0.88	22.294
evm.model.scaffold_375.114	0.86	1.29	0.86	59.904
evm.model.scaffold_375.681	1.09	1.36	0.55	10.647
evm.model.scaffold_375.56	1.31	0.75	0.94	52.64
evm.model.scaffold_375.444	1.47	0.87	0.67	29.344
evm.model.scaffold_375.607.3	1.86	0.73	0.41	87.285
evm.model.scaffold_375.562	0.6	1.8	0.6	35.469
evm.model.scaffold_375.205	1.58	0.67	0.75	17.949
evm.model.scaffold_375.528	1.53	0.55	0.93	10.177
evm.model.scaffold_375.739	1.8	0.9	0.3	13.589
evm.model.scaffold_375.517	1.5	1.13	0.38	527.664
evm.model.scaffold_375.773	2.06	0.43	0.51	22.547
evm.model.scaffold_375.516	1.54	0.54	0.92	14.373
evm.model.scaffold_375.123	1.27	1.04	0.69	33.214
evm.model.scaffold_375.188	1.7	0.39	0.91	11.63
evm.model.scaffold_375.197	1.8	1.2	0	378.507
evm.model.scaffold_375.399	2	0.67	0.33	34.204
evm.model.scaffold_375.143.1	2.1	0	0.9	11.839
evm.model.scaffold_375.289	0.67	0.83	1.5	34.464
evm.model.scaffold_375.510	2.75	0.25	0	12.216
evm.model.scaffold_375.119	1.4	0.53	1.06	35.199
evm.model.scaffold_375.212	1.25	0.5	1.25	22.583
evm.model.scaffold_375.619	1.5	0.95	0.55	13.735
evm.model.scaffold_375.291	1.13	1.13	0.75	22.954
evm.model.scaffold_375.16	1.8	0.45	0.75	14.934
evm.model.scaffold_375.116	1	1.5	0.5	25.254
evm.model.scaffold_375.487	0.86	1.93	0.21	95.283
evm.model.scaffold_375.688	2.5	0.5	0	11.346
evm.model.scaffold_375.261.1	2.06	0.38	0.56	85.821
evm.model.scaffold_375.320	1.46	0.26	1.29	12.663
evm.model.scaffold_375.279	1.5	0.9	0.6	11.283
evm.model.scaffold_375.191	1.82	0.18	1	33.878
evm.model.scaffold_375.687	1.13	1.13	0.75	10.564
evm.model.scaffold_375.395	0.86	1.5	0.64	16.028
evm.model.scaffold_375.117	1.96	0.35	0.69	32.105
evm.model.scaffold_375.469	2.08	0.46	0.46	19.71
evm.model.scaffold_375.166	2	0	1	66.397
evm.model.scaffold_375.47.5	1.11	1.11	0.79	15.892
evm.model.scaffold_375.506	1.13	0.38	1.5	12.621
evm.model.scaffold_375.573	1	1.33	0.67	27.341
evm.model.scaffold_375.747	0.67	1	1.33	37.714
evm.model.scaffold_375.534	2	0.33	0.67	33.604
evm.model.scaffold_375.60	1.11	1.11	0.79	35.152
evm.model.scaffold_375.634	0.75	0.75	1.5	13.015
evm.model.scaffold_375.470	1.5	1.5	0	47.779
evm.model.scaffold_375.467	2.13	0.25	0.63	18.225
evm.model.scaffold_375.472	0.79	2.05	0.16	108.744
evm.model.scaffold_375.363	0.75	0.75	1.5	190.352
evm.model.scaffold_375.160	0.75	1.5	0.75	15.892
evm.model.scaffold_375.99	1.14	0.93	0.93	18.603
evm.model.scaffold_375.689	1.83	0.33	0.83	13.285
evm.model.scaffold_375.468	1.4	0.6	1	14.446
evm.model.scaffold_375.6	1.13	0.38	1.5	14.989
evm.model.scaffold_375.125	1.67	0.33	1	10.791
evm.model.scaffold_375.309	0.75	0.75	1.5	29.718
evm.model.scaffold_375.332	1.41	0.53	1.06	32.668
evm.model.scaffold_375.288	0	3	0	95.813
evm.model.scaffold_375.398	1.42	0.95	0.63	14.925
evm.model.scaffold_375.513	1.5	1.5	0	114.607
evm.model.scaffold_375.746	1	1.5	0.5	10.148
evm.model.scaffold_375.525	1.29	1.29	0.43	27.715
evm.model.scaffold_375.540	2	1	0	10.84
evm.model.scaffold_375.130	1.5	1.5	0	11.49
evm.model.scaffold_375.721	1.5	1.05	0.45	409.108
evm.model.scaffold_375.387.1	1.29	1.29	0.43	41.133
evm.model.scaffold_375.73	1.33	1	0.67	37.06
evm.model.scaffold_375.165	1.66	0.6	0.74	10.156
evm.model.scaffold_375.219	1.43	0.71	0.86	11.261
evm.model.scaffold_375.142	1.26	0.79	0.95	15.741
evm.model.scaffold_375.539	0.55	1.09	1.36	52.194
evm.model.scaffold_375.34	1.44	0.92	0.63	27.544
evm.model.scaffold_375.449	0.75	1.88	0.38	136.32
evm.model.scaffold_375.738	1.27	1.04	0.69	11.113
evm.model.scaffold_375.466	1.5	0.58	0.92	17.981
evm.model.scaffold_375.258	1.42	1.11	0.47	22.601
evm.model.scaffold_375.726	1.15	1.38	0.46	22.174
evm.model.scaffold_375.586	1.71	0.57	0.71	87.378
evm.model.scaffold_375.190	1.29	0.86	0.86	100.117
evm.model.scaffold_375.157	2	0	1	20.918
evm.model.scaffold_375.27	1.93	0.64	0.43	73.091
evm.model.scaffold_375.445	1.3	0.8	0.9	22.479
evm.model.scaffold_375.154	1.71	0.43	0.86	23.876
evm.model.scaffold_375.294	1.16	0.39	1.45	100.794
evm.model.scaffold_375.412_evm.model.scaffold_375.414	1.06	0.88	1.06	17.882
evm.model.scaffold_375.213	2.4	0.6	0	14.386
evm.model.scaffold_375.431	2.57	0	0.43	65.631
evm.model.scaffold_375.587	1.63	0.37	1	22
evm.model.scaffold_375.663	1	2	0	231.61
evm.model.scaffold_375.658	1.44	0.74	0.82	18.994
evm.model.scaffold_375.223	1.5	1	0.5	20.807
evm.model.scaffold_375.713	1	1	1	14.403
evm.model.scaffold_375.662	1.33	0.63	1.04	14.081
evm.model.scaffold_375.434	1.15	0.92	0.92	88.04
evm.model.scaffold_375.74.1	2.25	0.43	0.32	45.799
evm.model.scaffold_375.566	1.4	0.73	0.87	42.202
evm.model.scaffold_375.151	0	3	0	13.153
evm.model.scaffold_375.450	1.13	0.94	0.94	717.654
evm.model.scaffold_375.505	0.75	0	2.25	11.378
evm.model.scaffold_375.761	0	0	0	1165.56
evm.model.scaffold_375.519	1.36	1.09	0.55	88.832
evm.model.scaffold_375.426	2.05	0.37	0.59	16.636
evm.model.scaffold_375.362	1.25	1	0.75	204.764
evm.model.scaffold_375.730	0	1.5	1.5	32.387
evm.model.scaffold_375.707	1.5	0.6	0.9	36.461
evm.model.scaffold_375.531.1	1.7	0.52	0.78	288.149
evm.model.scaffold_375.322	1.57	1.17	0.26	68.447
evm.model.scaffold_375.43	1.75	0.88	0.38	111.748
evm.model.scaffold_375.264	0.5	2	0.5	40.149
evm.model.scaffold_375.654	0.5	2	0.5	10.984
evm.model.scaffold_375.305	0.43	0.86	1.71	171.107
evm.model.scaffold_375.598	1.05	0.6	1.35	10.444
evm.model.scaffold_375.593	1.67	0.67	0.67	25.96
evm.model.scaffold_375.62	1.85	0.62	0.54	76.753
evm.model.scaffold_375.256	0	1.5	1.5	11.784
evm.model.scaffold_375.203	1.59	0.79	0.62	38
evm.model.scaffold_375.685	0.75	1	1.25	10.034
evm.model.scaffold_375.199	1.5	1	0.5	288.562
evm.model.scaffold_375.700	0.67	1.33	1	38.446
evm.model.scaffold_375.661	1.14	0.71	1.14	32.616
evm.model.scaffold_375.36	0	3	0	35.996
evm.model.scaffold_375.617	1.2	1.8	0	46.999
evm.model.scaffold_375.743	1.54	0.69	0.77	24.865
evm.model.scaffold_375.677	2.29	0.18	0.53	23.244
evm.model.scaffold_375.596	1.85	0.69	0.46	22.134
evm.model.scaffold_375.230	2.15	0.31	0.54	43.137
evm.model.scaffold_375.353	1.56	0.56	0.89	27.612
evm.model.scaffold_375.605	1.91	0.55	0.55	114.563
evm.model.scaffold_375.418	1.13	0.5	1.38	10.107
evm.model.scaffold_375.589	2.1	0.3	0.6	395.193
evm.model.scaffold_375.682	1.58	0.5	0.92	28.694
evm.model.scaffold_375.750	1.38	0.58	1.04	63.288
evm.model.scaffold_375.635	1.2	0.6	1.2	18.744
evm.model.scaffold_375.321	1.94	0.53	0.53	21.29
evm.model.scaffold_375.271	1.43	0.91	0.65	45.442
evm.model.scaffold_375.167	1.5	0.9	0.6	35.908
evm.model.scaffold_375.421	1.24	0.8	0.95	19.789
evm.model.scaffold_375.136	1.8	0	1.2	18.116
evm.model.scaffold_375.235	0.6	1.2	1.2	11.88
evm.model.scaffold_375.109	1.25	1	0.75	26.268
evm.model.scaffold_375.140	0.92	1.62	0.46	10.387
evm.model.scaffold_375.218	1.53	0.55	0.93	36.619
evm.model.scaffold_375.163	1.74	0.48	0.77	28.784
evm.model.scaffold_375.481	1.5	0.63	0.88	13.002
evm.model.scaffold_375.352	1.33	0.33	1.33	37.638
evm.model.scaffold_375.391	0.63	2.37	0	37.028
evm.model.scaffold_375.601	2	1	0	85.327
evm.model.scaffold_375.735	1	1	1	41.17
evm.model.scaffold_309.24	2.33	0.33	0.33	123.077
evm.model.scaffold_309.31	1.5	1.13	0.38	11.956
evm.model.scaffold_309.22	1.8	0.67	0.53	13.918
evm.model.scaffold_205.119	1.64	0.71	0.64	22.122
evm.model.scaffold_205.210	1.15	1.38	0.46	61.867
evm.model.scaffold_205.147	1.35	0.75	0.9	33.987
evm.model.scaffold_205.78	0.72	1.44	0.84	25.238
evm.model.scaffold_205.118	1.74	0.28	0.98	36.026
evm.model.scaffold_205.149	0.15	2.55	0.3	29.51
evm.model.scaffold_205.129	0	3	0	152.173
evm.model.scaffold_205.79	2	0	1	12.543
evm.model.scaffold_205.153	1	0.67	1.33	37.129
evm.model.scaffold_205.219	0	1.5	1.5	79.214
evm.model.scaffold_205.166	1	1	1	10.96
evm.model.scaffold_205.176	1.74	0.79	0.47	20.327
evm.model.scaffold_205.167	1.2	1.2	0.6	68.996
evm.model.scaffold_205.273	1.33	0.67	1	16.851
evm.model.scaffold_205.220	1.33	0.91	0.77	15.156
evm.model.scaffold_205.196	1	0.67	1.33	11.664
evm.model.scaffold_205.141	1.8	0.75	0.45	11.866
evm.model.scaffold_205.227	1.2	0.6	1.2	28.934
evm.model.scaffold_205.145	0.96	1.2	0.84	15.472
evm.model.scaffold_205.73.1	1.09	0.68	1.23	23.831
evm.model.scaffold_205.262	1.69	0.56	0.75	48.382
evm.model.scaffold_205.259	1.33	1	0.67	14.407
evm.model.scaffold_205.272	1.27	0.64	1.09	12.061
evm.model.scaffold_205.248	1.58	0.59	0.83	12.281
evm.model.scaffold_205.185	1.73	0.81	0.46	15.708
evm.model.scaffold_205.252	1.35	1.35	0.3	34.879
evm.model.scaffold_205.218	0	1.5	1.5	11.581
evm.model.scaffold_205.226	1.59	1.06	0.35	61.45
evm.model.scaffold_205.263	0.9	1.05	1.05	19.254
evm.model.scaffold_205.271	1.5	0.63	0.88	33.497
evm.model.scaffold_205.168	1.35	1.35	0.3	32.38
evm.model.scaffold_205.148	1.83	0.65	0.52	54.526
evm.model.scaffold_205.274	1.71	0.86	0.43	17.944
evm.model.scaffold_205.224	1.5	1.25	0.25	273.517
evm.model.scaffold_205.173	1.59	0.47	0.94	38.474
evm.model.scaffold_205.54	1.5	0.75	0.75	22.741
evm.model.scaffold_205.192	1.2	1.08	0.72	11.794
evm.model.scaffold_205.44	1.26	0.95	0.79	10.593
evm.model.scaffold_205.127	1.41	0.53	1.06	10.409
evm.model.scaffold_205.180	0.6	2.4	0	14.664
evm.model.scaffold_205.208	0.53	0.88	1.59	14.66
evm.model.scaffold_205.260	0.8	1.8	0.4	44.74
evm.model.scaffold_476.10	1.09	1.36	0.55	38.296
evm.model.scaffold_476.9	2	0.67	0.33	103.493
evm.model.scaffold_324.17	0.6	1.8	0.6	38.676
evm.model.scaffold_324.39	1.59	0.53	0.88	17.841
evm.model.scaffold_324.29	1.09	1.64	0.27	10.771
evm.model.scaffold_324.32	1.67	0.75	0.58	14.186
evm.model.scaffold_324.23	1.71	0.86	0.43	10.063
evm.model.scaffold_324.43	1.62	0.69	0.69	46.8
evm.model.scaffold_324.24	1.69	0.38	0.94	10.756
evm.model.scaffold_324.2	0.72	1.66	0.62	15.578
evm.model.scaffold_324.42	1.17	1.17	0.65	16.676
evm.model.scaffold_324.31	2.45	0.27	0.27	37.877
evm.model.scaffold_37.114.1	1	0.33	1.67	53.379
evm.model.scaffold_37.91.1	1.8	1.2	0	47.064
evm.model.scaffold_37.132	1.91	0.27	0.82	51.22
evm.model.scaffold_37.131	1.8	1.2	0	62.719
evm.model.scaffold_37.17	2	0.78	0.22	155.354
evm.model.scaffold_37.70	1.41	0.88	0.71	12.472
evm.model.scaffold_37.37	1	0.5	1.5	2830.09
evm.model.scaffold_37.115	1.13	1.35	0.52	11.308
evm.model.scaffold_37.52	1.67	0	1.33	12.628
evm.model.scaffold_37.72	2	0.5	0.5	23.068
evm.model.scaffold_37.61	2.25	0.38	0.38	101.395
evm.model.scaffold_37.137_evm.model.scaffold_37.138	1.5	1.24	0.26	26.812
evm.model.scaffold_37.43	1.5	0.38	1.13	275.277
evm.model.scaffold_37.141	1.69	0.56	0.75	55.321
evm.model.scaffold_37.90	1.5	0.25	1.25	35.322
evm.model.scaffold_37.71	1.32	1.08	0.6	24.707
evm.model.scaffold_37.18	0.9	1.5	0.6	39.432
evm.model.scaffold_37.144	1.71	0.86	0.43	17.296
evm.model.scaffold_37.41	1	0.5	1.5	1912.36
evm.model.scaffold_37.116	1.67	1.33	0	31.675
evm.model.scaffold_37.143	0.4	1.8	0.8	30.224
evm.model.scaffold_37.24.1	0.73	0.97	1.3	19.683
evm.model.scaffold_37.19	1.33	0.77	0.91	23.471
evm.model.scaffold_37.63	1.26	0.63	1.11	38.16
evm.model.scaffold_37.39	1	0.5	1.5	3520.39
evm.model.scaffold_21.69	0.9	0.9	1.2	16.751
evm.model.scaffold_21.21	1.29	0.43	1.29	53.49
evm.model.scaffold_21.19	1.44	0.56	1	14.806
evm.model.scaffold_21.39	1.5	1.5	0	63.041
evm.model.scaffold_21.46	0.38	1.5	1.13	48.906
evm.model.scaffold_21.22	1.29	0.86	0.86	10.572
evm.model.scaffold_21.32	1.67	0.33	1	17.285
evm.model.scaffold_21.38	1.41	0.84	0.75	29.177
evm.model.scaffold_21.53	1.4	0.52	1.08	58.708
evm.model.scaffold_21.17	1.76	0.53	0.71	10.039
evm.model.scaffold_21.54	1.31	0.94	0.75	12.417
evm.model.scaffold_21.42	1.43	1.29	0.29	40.068
evm.model.scaffold_21.58	1.68	0.72	0.6	22.509
evm.model.scaffold_21.59	0.75	1.5	0.75	247.463
evm.model.scaffold_21.60	1.18	0.82	1	13.741
evm.model.scaffold_21.71	1.19	0.62	1.19	41.299
evm.model.scaffold_12.101	1.07	1.07	0.86	55.485
evm.model.scaffold_12.230	1.3	0.78	0.91	96.803
evm.model.scaffold_12.75	1.5	1.5	0	50.502
evm.model.scaffold_12.140	2	0.67	0.33	315.473
evm.model.scaffold_12.278	1.32	1.17	0.51	14.371
evm.model.scaffold_12.320.1	1.25	0.75	1	246.933
evm.model.scaffold_12.66	1.8	0.9	0.3	11.779
evm.model.scaffold_12.271	1.44	1.32	0.24	37.354
evm.model.scaffold_12.41	3	0	0	32.97
evm.model.scaffold_12.170	1.57	0.68	0.75	36.638
evm.model.scaffold_12.215	0.5	2	0.5	66.505
evm.model.scaffold_12.127.3	2.25	0.25	0.5	38.167
evm.model.scaffold_12.272.1	1.54	0.44	1.02	28.749
evm.model.scaffold_12.146.1	1.59	0.44	0.97	20.861
evm.model.scaffold_12.201	0.52	2.35	0.13	34.015
evm.model.scaffold_12.28	2.14	0.21	0.64	34.304
evm.model.scaffold_12.240	0	3	0	45.1
evm.model.scaffold_12.274.3	1.43	0.91	0.65	29.21
evm.model.scaffold_12.306	1.68	0.36	0.96	16.68
evm.model.scaffold_12.71	1.5	0.6	0.9	31.796
evm.model.scaffold_12.244.1	1.8	0.6	0.6	10.993
evm.model.scaffold_12.74	0.67	2	0.33	152.915
evm.model.scaffold_12.86	1.94	0.29	0.77	16.651
evm.model.scaffold_12.232	1.8	0.6	0.6	558.477
evm.model.scaffold_12.226	1.29	0.77	0.94	13.348
evm.model.scaffold_12.33	1.5	1.5	0	50.097
evm.model.scaffold_12.248	1.41	0.71	0.88	17.03
evm.model.scaffold_12.221.2	0.95	1.09	0.95	124.78
evm.model.scaffold_12.158	1.38	0.69	0.92	16.434
evm.model.scaffold_12.204	0.27	2.45	0.27	19.183
evm.model.scaffold_12.149	1.5	0.75	0.75	14.832
evm.model.scaffold_12.253	0.75	2.25	0	16.498
evm.model.scaffold_12.222	1.33	0.33	1.33	61.873
evm.model.scaffold_12.288	1.35	1.2	0.45	15.467
evm.model.scaffold_12.36	1.67	1.33	0	58.033
evm.model.scaffold_12.276	1.5	0.5	1	43.924
evm.model.scaffold_12.298	1.71	0.86	0.43	55.917
evm.model.scaffold_12.80	1.13	1.88	0	31.601
evm.model.scaffold_12.314	0.91	0.78	1.3	51.31
evm.model.scaffold_176.314	1.33	0.67	1	51.952
evm.model.scaffold_176.163	1.47	0.98	0.56	39.189
evm.model.scaffold_176.196	0	1.5	1.5	13.336
evm.model.scaffold_176.272	1.4	0.8	0.8	14.558
evm.model.scaffold_176.291	1.92	0.72	0.36	18.94
evm.model.scaffold_176.22	1.09	0.82	1.09	22.326
evm.model.scaffold_176.260	1	0	2	14.834
evm.model.scaffold_176.12.1	1.24	0.72	1.04	14.735
evm.model.scaffold_176.130	0.67	0.67	1.67	18.712
evm.model.scaffold_176.323.4	1.35	0.45	1.2	89.042
evm.model.scaffold_176.315	2.4	0.6	0	12.645
evm.model.scaffold_176.76	0.86	1.71	0.43	10.292
evm.model.scaffold_176.295	2	0	1	64.266
evm.model.scaffold_176.89	1.4	1.2	0.4	134.818
evm.model.scaffold_176.335	1	1.17	0.83	13.904
evm.model.scaffold_176.240	0.82	1.91	0.27	84.106
evm.model.scaffold_176.133	1.76	0.71	0.53	92.595
evm.model.scaffold_176.60	1.14	1	0.86	17.809
evm.model.scaffold_176.170	2.25	0	0.75	62.774
evm.model.scaffold_176.73	0.67	1.67	0.67	154.063
evm.model.scaffold_176.276	1.26	0.32	1.42	19.628
evm.model.scaffold_176.6_evm.model.scaffold_176.7	1.32	0.62	1.06	40.336
evm.model.scaffold_176.216	1.29	0.43	1.29	134.411
evm.model.scaffold_176.327.1	1.41	1.41	0.18	10.556
evm.model.scaffold_176.296	1.5	0.75	0.75	123.244
evm.model.scaffold_176.262	1.26	1.11	0.63	24.789
evm.model.scaffold_176.242	2.25	0.75	0	105.652
evm.model.scaffold_176.161	1.5	1.13	0.38	55.042
evm.model.scaffold_176.138.1	1.45	0.64	0.91	14.945
evm.model.scaffold_176.54	1.29	0.86	0.86	14.296
evm.model.scaffold_176.172	0.6	2.4	0	10.002
evm.model.scaffold_176.35	2.16	0.6	0.24	34.293
evm.model.scaffold_176.220	2.25	0.15	0.6	50.928
evm.model.scaffold_176.80	0.75	1.5	0.75	1304.21
evm.model.scaffold_176.241	2	0.5	0.5	130.642
evm.model.scaffold_176.92	1.54	1.05	0.41	15.457
evm.model.scaffold_176.290	0.75	1.88	0.38	147.438
evm.model.scaffold_176.186	2.47	0.18	0.35	55.23
evm.model.scaffold_176.64.1	1	1.14	0.86	76.225
evm.model.scaffold_176.210	2	1	0	19.966
evm.model.scaffold_176.188	1.67	0.67	0.67	37.143
evm.model.scaffold_176.279	1.26	1.18	0.55	25.686
evm.model.scaffold_176.243	1.43	0.98	0.59	15.763
evm.model.scaffold_176.78	1.29	1.29	0.43	2330.76
evm.model.scaffold_176.218.1	1.8	0.24	0.96	29.516
evm.model.scaffold_176.305	1.69	0.75	0.56	45.524
evm.model.scaffold_176.199	1.2	1.32	0.48	63.044
evm.model.scaffold_176.228	1.57	0.71	0.71	15.492
evm.model.scaffold_176.151	1.29	0.86	0.86	12.793
evm.model.scaffold_176.132	1.5	0.75	0.75	15.775
evm.model.scaffold_176.277	1.62	0	1.38	17.413
evm.model.scaffold_176.235	1.6	1.2	0.2	130.327
evm.model.scaffold_176.267	1.89	0.44	0.67	11.168
evm.model.scaffold_176.261	1.8	1.2	0	17.114
evm.model.scaffold_176.316	1.47	0.53	1	36.437
evm.model.scaffold_176.329	1	1	1	16.688
evm.model.scaffold_176.165	1.46	0.8	0.73	12.097
evm.model.scaffold_176.238	0.75	2	0.25	98.161
evm.model.scaffold_176.332	1.13	1.13	0.75	16.524
evm.model.scaffold_176.79	1.33	1	0.67	3227.67
evm.model.scaffold_176.213	1.33	1.33	0.33	57.327
evm.model.scaffold_176.298	2.22	0.56	0.22	101.176
evm.model.scaffold_176.265	1.68	0.51	0.8	15.358
evm.model.scaffold_176.139	2	0.63	0.38	48.548
evm.model.scaffold_176.169	1.33	0.67	1	18.492
evm.model.scaffold_176.74	1.5	1.5	0	22.479
evm.model.scaffold_176.131	1.93	0.43	0.64	10.651
evm.model.scaffold_176.246	1.38	0.63	1	34.023
evm.model.scaffold_176.104	1.88	1.13	0	48.051
evm.model.scaffold_176.77	1.13	1.13	0.75	1305.81
evm.model.scaffold_176.266	2.1	0.9	0	77.914
evm.model.scaffold_176.330	1.5	0.75	0.75	14.233
evm.model.scaffold_176.264	1.5	1.5	0	40.114
evm.model.scaffold_176.200	1.29	1.29	0.43	20.215
evm.model.scaffold_176.278	0.67	1	1.33	74.605
evm.model.scaffold_176.103	1.91	0.55	0.55	13.933
evm.model.scaffold_176.333	0.75	1.13	1.13	20.279
evm.model.scaffold_176.83	1.5	0.75	0.75	235.166
evm.model.scaffold_176.287	1.83	0.33	0.83	71.355
evm.model.scaffold_176.212	1.04	0.65	1.3	75.794
evm.model.scaffold_176.337	1.67	0.52	0.81	30.401
evm.model.scaffold_176.156	1.35	0.9	0.75	1179.08
evm.model.scaffold_176.282	0.29	2.57	0.14	66.511
evm.model.scaffold_176.297	1.93	0.43	0.64	118.857
evm.model.scaffold_176.178	1	2	0	29.092
evm.model.scaffold_176.289	1.5	1.2	0.3	40.042
evm.model.scaffold_176.203	1.59	1.06	0.35	18.779
evm.model.scaffold_176.8	1.2	0.8	1	48.822
evm.model.scaffold_41.38	1.67	0.67	0.67	53.104
evm.model.scaffold_41.24	1.94	0.53	0.53	10.044
evm.model.scaffold_41.48	2.25	0.75	0	27.678
evm.model.scaffold_41.14	0	0	3	48.18
evm.model.scaffold_41.16	0	3	0	28.924
evm.model.scaffold_41.26	1.5	0.9	0.6	23.1
evm.model.scaffold_464.1	0	3	0	14.649
evm.model.scaffold_60.15	3	0	0	85.692
evm.model.scaffold_60.41	0.95	0.73	1.32	11.29
evm.model.scaffold_60.56	2.73	0.27	0	11.555
evm.model.scaffold_60.21	2.25	0.75	0	20.949
evm.model.scaffold_60.54	1.8	0.3	0.9	10.69
evm.model.scaffold_60.51.1	0.86	0.86	1.29	15.65
evm.model.scaffold_60.25	0.4	1.2	1.4	15.743
evm.model.scaffold_168.26	1.29	0.86	0.86	14.586
evm.model.scaffold_168.24	0.6	1.2	1.2	10.978
evm.model.scaffold_168.3	0.38	2.25	0.38	17.578
evm.model.scaffold_168.31	1.29	1.71	0	10.145
evm.model.scaffold_168.40	0.27	2.18	0.55	51.718
evm.model.scaffold_168.45	2	0.67	0.33	34.437
evm.model.scaffold_168.10	0	3	0	16.53
evm.model.scaffold_168.14	1.8	0.45	0.75	16.585
evm.model.scaffold_100.915	1.5	0.66	0.84	36.899
evm.model.scaffold_100.38	0.6	1.8	0.6	166.22
evm.model.scaffold_100.1009	1.59	0.35	1.06	13.211
evm.model.scaffold_100.1289	2.33	0.33	0.33	105.734
evm.model.scaffold_100.116	1.2	0.6	1.2	48.447
evm.model.scaffold_100.1161	1.15	0.92	0.92	158.003
evm.model.scaffold_100.1692	1.8	0.6	0.6	16.486
evm.model.scaffold_100.1335	1.5	1.05	0.45	35.007
evm.model.scaffold_100.331	1	1.33	0.67	107.066
evm.model.scaffold_100.1259	1.33	1.33	0.33	30.798
evm.model.scaffold_100.388	1.32	0.71	0.97	12.976
evm.model.scaffold_100.1154	1.89	0.63	0.47	173.686
evm.model.scaffold_100.1137	1.16	1.16	0.68	35.499
evm.model.scaffold_100.1263	1.5	0.67	0.83	49.099
evm.model.scaffold_100.97	1.31	0.56	1.13	26.295
evm.model.scaffold_100.742	1.76	0.48	0.76	16.172
evm.model.scaffold_100.98	1.38	0.63	1	31.961
evm.model.scaffold_100.660	1	0.67	1.33	11.999
evm.model.scaffold_100.99	1.59	0.53	0.88	19.024
evm.model.scaffold_100.697	0.86	1.29	0.86	380.173
evm.model.scaffold_100.1595	1.86	0.62	0.52	57.095
evm.model.scaffold_100.1710	0	3	0	18.929
evm.model.scaffold_100.1543	1.2	0.94	0.86	17.05
evm.model.scaffold_100.897	0.5	1.5	1	156.998
evm.model.scaffold_100.1625	1.66	0.55	0.79	114.871
evm.model.scaffold_100.397	1.5	0.38	1.13	13.6
evm.model.scaffold_100.848	1.35	0.9	0.75	44.545
evm.model.scaffold_100.142	2.33	0.5	0.17	184.416
evm.model.scaffold_100.745	0.21	1.07	1.71	15.188
evm.model.scaffold_100.785	1.5	1.13	0.38	57.413
evm.model.scaffold_100.1144	1.74	0.47	0.79	15.652
evm.model.scaffold_100.75	1.41	0.84	0.75	18.453
evm.model.scaffold_100.415	1.5	1.5	0	111.524
evm.model.scaffold_100.1438	2.25	0.56	0.19	16.531
evm.model.scaffold_100.205	1.43	1.04	0.52	49.914
evm.model.scaffold_100.656	1.86	0.52	0.62	34.862
evm.model.scaffold_100.1737	1.33	0.67	1	15.711
evm.model.scaffold_100.1400	1.47	0.87	0.67	14.339
evm.model.scaffold_100.439	1	1.33	0.67	39.826
evm.model.scaffold_100.643	1.29	1.07	0.64	73.395
evm.model.scaffold_100.1277	1.29	1.29	0.43	14.562
evm.model.scaffold_100.375	1	1	1	16.701
evm.model.scaffold_100.510	1.67	0.56	0.78	11.076
evm.model.scaffold_100.61	0.31	1.86	0.83	27.167
evm.model.scaffold_100.465	0.78	0.78	1.43	53.931
evm.model.scaffold_100.890	1.69	0.94	0.38	10.158
evm.model.scaffold_100.1251.1	1.88	1.13	0	22.806
evm.model.scaffold_100.971	1.13	0.56	1.31	23.239
evm.model.scaffold_100.143	1.36	0.82	0.82	140.829
evm.model.scaffold_100.1697	1.13	1.88	0	21.378
evm.model.scaffold_100.896	1.13	1.31	0.56	149.887
evm.model.scaffold_100.1439	1	0.5	1.5	46.279
evm.model.scaffold_100.1577	0.91	0.91	1.17	15.891
evm.model.scaffold_100.52	1.06	0.88	1.06	31.031
evm.model.scaffold_100.78	0.86	0.86	1.29	30.163
evm.model.scaffold_100.1262	1.5	0	1.5	12.032
evm.model.scaffold_100.1164	0.95	1.89	0.16	130.736
evm.model.scaffold_100.1084	1.5	0.43	1.07	27.543
evm.model.scaffold_100.1540	2	0	1	10.978
evm.model.scaffold_100.531	1.5	0	1.5	33.779
evm.model.scaffold_100.582	1.42	0.47	1.11	22.776
evm.model.scaffold_100.1513	2.25	0	0.75	37.991
evm.model.scaffold_100.1795	1.88	0.19	0.94	79.155
evm.model.scaffold_100.34	0.3	1.5	1.2	78.892
evm.model.scaffold_100.960	1.23	1.36	0.41	14.116
evm.model.scaffold_100.1010	1.45	0.58	0.97	10.376
evm.model.scaffold_100.1274	1.39	0.6	1.01	28.856
evm.model.scaffold_100.1906_evm.model.scaffold_100.1907	1.82	0.67	0.51	12.436
evm.model.scaffold_100.1821	1.38	0.5	1.13	41.098
evm.model.scaffold_100.36	0.67	2.17	0.17	84.423
evm.model.scaffold_100.1547.1	1.67	1.17	0.17	25.63
evm.model.scaffold_100.851.2	1.85	0.79	0.35	14.028
evm.model.scaffold_100.667	0.78	1.57	0.65	11.419
evm.model.scaffold_100.1079	1.35	0.9	0.75	17.708
evm.model.scaffold_100.1216	1.56	0.6	0.84	177.837
evm.model.scaffold_100.1581	0.82	1.36	0.82	13.516
evm.model.scaffold_100.1242	2.22	0	0.78	28.614
evm.model.scaffold_100.60	0.92	0.46	1.62	85.768
evm.model.scaffold_100.827	1.42	0.55	1.03	69.295
evm.model.scaffold_100.1020	1.04	0.92	1.04	14.844
evm.model.scaffold_100.858	2.4	0	0.6	20.775
evm.model.scaffold_100.474	2	0.8	0.2	26.236
evm.model.scaffold_100.507	2.15	0.38	0.46	52.569
evm.model.scaffold_100.280	1.4	0.58	1.03	12.11
evm.model.scaffold_100.900	1.76	0.53	0.71	40.909
evm.model.scaffold_100.1172	1.56	0.72	0.72	64.083
evm.model.scaffold_100.809	1.05	1.05	0.89	46.89
evm.model.scaffold_100.554	1.33	0.56	1.11	48.674
evm.model.scaffold_100.1508	0.38	1.5	1.13	136.567
evm.model.scaffold_100.690	0.41	2.32	0.27	55.159
evm.model.scaffold_100.1206	0.6	2.4	0	117.375
evm.model.scaffold_100.171	1.5	0.75	0.75	14.044
evm.model.scaffold_100.384	1.09	0.82	1.09	16.694
evm.model.scaffold_100.1359	1.88	0.75	0.38	14.604
evm.model.scaffold_100.389	2.4	0	0.6	11.002
evm.model.scaffold_100.1466	0.92	0.46	1.62	11.417
evm.model.scaffold_100.1695	1.8	0.72	0.48	55.242
evm.model.scaffold_100.941	1.13	0.75	1.13	50.986
evm.model.scaffold_100.125	0.71	0.86	1.43	64.006
evm.model.scaffold_100.15	1.4	1.6	0	112.974
evm.model.scaffold_100.348	1.2	1.2	0.6	57.06
evm.model.scaffold_100.173	1	2	0	15.926
evm.model.scaffold_100.1002	0.38	1.88	0.75	33.795
evm.model.scaffold_100.720	1.89	0.39	0.71	16.663
evm.model.scaffold_100.1333	0.75	0.75	1.5	38.199
evm.model.scaffold_100.367	0.97	1.54	0.49	30.241
evm.model.scaffold_100.420	1.43	1.14	0.43	39.581
evm.model.scaffold_100.1136	0.78	1.96	0.26	314.552
evm.model.scaffold_100.1384	2.5	0.5	0	630.558
evm.model.scaffold_100.292	1.76	0.35	0.88	44.301
evm.model.scaffold_100.1306	0.67	2	0.33	10.623
evm.model.scaffold_100.1247	1.67	0	1.33	12.893
evm.model.scaffold_100.300	1.15	1.15	0.69	15.769
evm.model.scaffold_100.569	1	2	0	22.003
evm.model.scaffold_100.702	1.5	1.5	0	93.265
evm.model.scaffold_100.1473	1.08	0.48	1.44	12.676
evm.model.scaffold_100.1672	1.5	1.5	0	128.719
evm.model.scaffold_100.1766	1.5	1.5	0	23.124
evm.model.scaffold_100.226	2.4	0	0.6	11.391
evm.model.scaffold_100.309	0.53	1.41	1.06	23.149
evm.model.scaffold_100.1098	1.6	0.6	0.8	13.041
evm.model.scaffold_100.73	1.67	0.5	0.83	18.556
evm.model.scaffold_100.714	2.67	0	0.33	161.585
evm.model.scaffold_100.114	1.2	1.2	0.6	40.566
evm.model.scaffold_100.10	1.2	1.2	0.6	26.979
evm.model.scaffold_100.505	2.08	0.69	0.23	68.871
evm.model.scaffold_100.838	1.5	0.83	0.67	224.636
evm.model.scaffold_100.1062	1.25	1	0.75	10.445
evm.model.scaffold_100.19	1.17	0.33	1.5	44.221
evm.model.scaffold_100.359	1.5	0.8	0.7	92.648
evm.model.scaffold_100.154	0	3	0	82.702
evm.model.scaffold_100.392	1.15	0.69	1.15	18.38
evm.model.scaffold_100.704.2	1.44	0.36	1.2	20.333
evm.model.scaffold_100.863	1.83	0.5	0.67	14.264
evm.model.scaffold_100.889	2	0.5	0.5	10.277
evm.model.scaffold_100.351	1.5	0.83	0.67	29.333
evm.model.scaffold_100.814	1.08	0.85	1.08	12.022
evm.model.scaffold_100.1360	1.42	0.63	0.95	56.157
evm.model.scaffold_100.1328	1.8	0.6	0.6	18.913
evm.model.scaffold_100.631	1.5	0.38	1.13	34.811
evm.model.scaffold_100.875_evm.model.scaffold_100.876	1.2	1.2	0.6	31.592
evm.model.scaffold_100.984	1.94	0.35	0.71	17.107
evm.model.scaffold_100.1904	0	0	0	14.126
evm.model.scaffold_100.1038	1.58	0.62	0.79	12.995
evm.model.scaffold_100.1011	2.63	0.38	0	12.651
evm.model.scaffold_100.442	1.35	0.9	0.75	19.73
evm.model.scaffold_100.1516	1.33	0.83	0.83	20.988
evm.model.scaffold_100.802	1.33	0.67	1	138.441
evm.model.scaffold_100.1514	1.5	0.83	0.67	12.563
evm.model.scaffold_100.482	0.43	2.57	0	134.954
evm.model.scaffold_100.856	2.33	0.33	0.33	87.057
evm.model.scaffold_100.1023	1.72	0.56	0.72	63.471
evm.model.scaffold_100.1339	2.08	0.46	0.46	70.878
evm.model.scaffold_100.1013	1.14	0.71	1.14	13.907
evm.model.scaffold_100.119	1.75	0.75	0.5	26.942
evm.model.scaffold_100.1015.1	1.38	0.77	0.85	40.136
evm.model.scaffold_100.176	0.75	1.5	0.75	14.772
evm.model.scaffold_100.1321	1.29	1.5	0.21	30.571
evm.model.scaffold_100.323	0.75	0	2.25	213.225
evm.model.scaffold_100.1683	1	1.5	0.5	22.923
evm.model.scaffold_100.881.1	0.5	0.67	1.83	22.759
evm.model.scaffold_100.1394	1.07	1.71	0.21	24.209
evm.model.scaffold_100.49	1.5	0.75	0.75	31.217
evm.model.scaffold_100.1805	1.62	0.48	0.9	23.64
evm.model.scaffold_100.1586	0.88	0.88	1.24	17.948
evm.model.scaffold_100.1752	2.14	0.21	0.64	22.179
evm.model.scaffold_100.1856	1	1	1	16.845
evm.model.scaffold_100.1753	1	1	1	16.098
evm.model.scaffold_100.1393	1.22	0.66	1.13	23.241
evm.model.scaffold_100.1313	1.41	1.06	0.53	23.788
evm.model.scaffold_100.1454	1.5	0.6	0.9	27.356
evm.model.scaffold_100.1548	1.36	0.82	0.82	73.902
evm.model.scaffold_100.51	0	1.2	1.8	21.89
evm.model.scaffold_100.1414	0.43	0.86	1.71	14.894
evm.model.scaffold_100.1046	1.5	0	1.5	109.267
evm.model.scaffold_100.1058	2	0.33	0.67	11.262
evm.model.scaffold_100.990	1.69	1.31	0	149.785
evm.model.scaffold_100.57	1.68	1.06	0.26	42.942
evm.model.scaffold_100.1191	1.13	0.75	1.13	12.568
evm.model.scaffold_100.1044	1.67	0.33	1	71.688
evm.model.scaffold_100.1171	1.5	0.5	1	35.281
evm.model.scaffold_100.187	0.43	2.57	0	11.898
evm.model.scaffold_100.158	0.43	1.29	1.29	27.777
evm.model.scaffold_100.1397	1.6	0.6	0.8	12.112
evm.model.scaffold_100.312	1.89	0.16	0.95	28.501
evm.model.scaffold_100.1238	1.17	0.83	1	12.576
evm.model.scaffold_100.1118	1.36	0.82	0.82	86.929
evm.model.scaffold_100.1776	0.9	1.13	0.98	19.023
evm.model.scaffold_100.945	0	3	0	16.102
evm.model.scaffold_100.1847	1.8	0.48	0.72	34.068
evm.model.scaffold_100.356	1.45	0.58	0.97	27.007
evm.model.scaffold_100.1813	1.65	0.45	0.9	22.115
evm.model.scaffold_100.218	0.75	2.25	0	105.973
evm.model.scaffold_100.1347	1	0	2	23.891
evm.model.scaffold_100.683	1.41	1.06	0.53	89.724
evm.model.scaffold_100.227	2.25	0	0.75	10.685
evm.model.scaffold_100.361	1.13	1.13	0.75	64.702
evm.model.scaffold_100.434	1.95	0.6	0.45	40.375
evm.model.scaffold_100.104	1.5	0.75	0.75	12.097
evm.model.scaffold_100.1485	0	3	0	149.674
evm.model.scaffold_100.475	0	2.25	0.75	310.569
evm.model.scaffold_100.535	1.83	0.33	0.83	13.994
evm.model.scaffold_100.318	1.2	0.6	1.2	19.976
evm.model.scaffold_100.1674	0.79	0.79	1.42	22.522
evm.model.scaffold_100.186	1.89	0.63	0.47	31.763
evm.model.scaffold_100.1188	1.15	1.23	0.62	22.727
evm.model.scaffold_100.1149	1.88	0.38	0.75	35.91
evm.model.scaffold_100.942.1	1.89	0.6	0.51	16.328
evm.model.scaffold_100.1227	1.2	0	1.8	14.417
evm.model.scaffold_100.283	0	2.4	0.6	602.227
evm.model.scaffold_100.1181	1.83	0.58	0.58	20.24
evm.model.scaffold_100.306	1.84	0.68	0.48	45.951
evm.model.scaffold_100.609	1.5	1	0.5	18.188
evm.model.scaffold_100.956	1.45	0.97	0.58	13.452
evm.model.scaffold_100.1861	1.91	0.82	0.27	16.69
evm.model.scaffold_100.166	1.64	0.41	0.95	14.348
evm.model.scaffold_100.1150.5	1.7	0.5	0.8	106.173
evm.model.scaffold_100.1452	1.07	1.07	0.86	24.758
evm.model.scaffold_100.709	1.7	0.91	0.39	12.625
evm.model.scaffold_100.778	0.88	1.76	0.35	28.429
evm.model.scaffold_100.489	1.93	0.64	0.43	39.662
evm.model.scaffold_100.248.1	1.5	1	0.5	24.769
evm.model.scaffold_100.800	1.68	0.24	1.08	15.671
evm.model.scaffold_100.1106	1.5	0.75	0.75	49.43
evm.model.scaffold_100.1241	0.67	1.67	0.67	128.793
evm.model.scaffold_100.986	0.9	0.9	1.2	31.42
evm.model.scaffold_100.103	1.25	1.25	0.5	14.561
evm.model.scaffold_100.644	0	3	0	124.648
evm.model.scaffold_100.1162	1	1.5	0.5	68.374
evm.model.scaffold_100.373	1	2	0	295.1
evm.model.scaffold_100.910	0.6	0.3	2.1	29.083
evm.model.scaffold_100.862	1.7	0.65	0.65	25.227
evm.model.scaffold_100.830	1.5	0.25	1.25	16.622
evm.model.scaffold_100.1103	0.81	1.27	0.92	31.798
evm.model.scaffold_100.381	1.8	1.2	0	28.512
evm.model.scaffold_100.1903	1.5	0.75	0.75	10.889
evm.model.scaffold_100.537.1	1.38	0.92	0.69	534.717
evm.model.scaffold_100.591	1.2	0.6	1.2	13.319
evm.model.scaffold_100.374	0.75	0.3	1.95	25.839
evm.model.scaffold_100.253	0.86	1.07	1.07	35.681
evm.model.scaffold_100.1184	1.57	0.46	0.98	12.632
evm.model.scaffold_100.952	1.5	1.29	0.21	84.336
evm.model.scaffold_100.1349	1.8	0.9	0.3	53.865
evm.model.scaffold_100.452	1.74	0.63	0.63	24.531
evm.model.scaffold_100.1377	1.53	0.63	0.84	25.166
evm.model.scaffold_100.773.1	1.75	1	0.25	103.401
evm.model.scaffold_100.1087	2	0.83	0.17	260.474
evm.model.scaffold_100.653.1	1.5	0.75	0.75	46.989
evm.model.scaffold_100.687.2	1.26	0.47	1.26	27.993
evm.model.scaffold_100.1027	1.57	0.75	0.68	35.172
evm.model.scaffold_100.185	1.85	0.58	0.58	11.096
evm.model.scaffold_100.1408	1.5	1.5	0	15.941
evm.model.scaffold_100.981	1.5	1.25	0.25	11.899
evm.model.scaffold_100.1318.1	1.31	1.5	0.19	18.232
evm.model.scaffold_100.460	0.94	1.31	0.75	10.041
evm.model.scaffold_100.350	1.29	0.43	1.29	19.219
evm.model.scaffold_100.1854	1	0.6	1.4	28.655
evm.model.scaffold_100.481	1.24	1.41	0.35	19.321
evm.model.scaffold_100.1503	1.62	0.92	0.46	72.09
evm.model.scaffold_100.1720	1.33	0.67	1	10.815
evm.model.scaffold_100.353	1.76	0.97	0.26	35.083
evm.model.scaffold_100.1148	1.03	1.2	0.77	15.005
evm.model.scaffold_100.17	1.5	1.5	0	115.878
evm.model.scaffold_100.1116	1.7	0.91	0.39	26.241
evm.model.scaffold_100.651	0.6	0.6	1.8	27.403
evm.model.scaffold_100.1030	0.95	0.95	1.11	10.399
evm.model.scaffold_100.299	0.92	1.85	0.23	62.596
evm.model.scaffold_100.1240	1	1.6	0.4	77.406
evm.model.scaffold_100.650	1.64	0.68	0.68	10.231
evm.model.scaffold_100.487	1.5	1.5	0	18.71
evm.model.scaffold_100.1111	1.62	0.69	0.69	240.232
evm.model.scaffold_100.1440	1.75	0.75	0.5	37.882
evm.model.scaffold_100.891	0.6	2.4	0	361.589
evm.model.scaffold_100.540	2.14	0	0.86	94.978
evm.model.scaffold_100.932.2	1.64	0.36	1	40.624
evm.model.scaffold_100.884	2	1	0	106.548
evm.model.scaffold_100.1537	1	1	1	49.033
evm.model.scaffold_100.905	1.33	0.64	1.03	16.543
evm.model.scaffold_100.1597	0.43	1.86	0.71	15.001
evm.model.scaffold_100.1905	1.35	0.58	1.06	10.274
evm.model.scaffold_100.921	0.98	1.03	0.98	53.864
evm.model.scaffold_100.456	1.33	0.33	1.33	14.853
evm.model.scaffold_100.330	1.29	0.86	0.86	215.905
evm.model.scaffold_100.934	1.11	1.26	0.63	18.158
evm.model.scaffold_100.1787	0.92	1.73	0.35	26.715
evm.model.scaffold_100.357	0.6	2.4	0	103.29
evm.model.scaffold_100.1288	0.75	1.88	0.38	38.706
evm.model.scaffold_100.206	1.5	1.5	0	57.006
evm.model.scaffold_100.563	2.25	0.75	0	270.379
evm.model.scaffold_100.846	1.59	0.56	0.84	14.912
evm.model.scaffold_100.1573	1.22	1	0.78	56.494
evm.model.scaffold_100.695	1	1	1	50.304
evm.model.scaffold_100.287	1.2	0.6	1.2	114.46
evm.model.scaffold_100.498	0	3	0	12.161
evm.model.scaffold_100.1699	1.69	0.94	0.38	10.057
evm.model.scaffold_100.719	1.5	1.5	0	119.181
evm.model.scaffold_100.335	0.5	1.75	0.75	24.376
evm.model.scaffold_100.917	1.5	0	1.5	88.845
evm.model.scaffold_100.1879	1.89	0.87	0.24	49.088
evm.model.scaffold_100.383	1.29	0.86	0.86	20.223
evm.model.scaffold_100.1082	1.36	1.09	0.55	17.493
evm.model.scaffold_100.1389	1.25	0.75	1	43.88
evm.model.scaffold_100.320	1.38	0.23	1.38	12.712
evm.model.scaffold_100.857	1.42	0.47	1.11	19.829
evm.model.scaffold_100.506	1.71	0.64	0.64	35.386
evm.model.scaffold_100.140	1.5	0.75	0.75	12.547
evm.model.scaffold_100.1063	1.2	0.72	1.08	12.221
evm.model.scaffold_100.399	1.5	0.75	0.75	15.896
evm.model.scaffold_100.493	1.57	0.71	0.71	28.449
evm.model.scaffold_100.1395	1.36	0.55	1.09	17.325
evm.model.scaffold_100.149	1.46	0.88	0.66	21.343
evm.model.scaffold_100.1671	1.83	0.67	0.5	215.952
evm.model.scaffold_100.520	0	1.29	1.71	12.328
evm.model.scaffold_100.1351	1	2	0	20.215
evm.model.scaffold_100.394	2	0.25	0.75	11.47
evm.model.scaffold_100.718	0.75	1.5	0.75	19.028
evm.model.scaffold_100.1654.1	2	0.43	0.57	29.452
evm.model.scaffold_100.908	1.45	0.64	0.91	25.985
evm.model.scaffold_100.532	1.33	1.33	0.33	15.017
evm.model.scaffold_100.1667	1.25	0.75	1	11.398
evm.model.scaffold_100.1744	3	0	0	18.41
evm.model.scaffold_100.499_evm.model.scaffold_100.500	0.92	1.27	0.81	10.402
evm.model.scaffold_100.556	0.4	1.6	1	24.984
evm.model.scaffold_100.54	1.5	0.64	0.86	23.381
evm.model.scaffold_100.686	0.82	1.64	0.55	21.764
evm.model.scaffold_100.1228	0.71	1.41	0.88	16.44
evm.model.scaffold_100.904	1.36	0.55	1.09	19.108
evm.model.scaffold_100.794.1	1.5	0.64	0.86	11.847
evm.model.scaffold_100.635	1.36	0.82	0.82	344.442
evm.model.scaffold_100.1745	1.2	0.6	1.2	39.109
evm.model.scaffold_100.1539	2.14	0	0.86	24.652
evm.model.scaffold_100.1499	1.56	0.44	1	11.743
evm.model.scaffold_100.1556	0.72	2.16	0.12	225.728
evm.model.scaffold_100.137	1.42	0.65	0.93	10.919
evm.model.scaffold_100.50	1.29	1.29	0.43	67.577
evm.model.scaffold_100.791.1	1.26	1.45	0.29	18.218
evm.model.scaffold_100.56.1	1.3	0.5	1.2	235.564
evm.model.scaffold_100.744	1.76	0.71	0.53	10.723
evm.model.scaffold_100.1474	2.1	0	0.9	20.923
evm.model.scaffold_100.1658	2.54	0.23	0.23	41.713
evm.model.scaffold_100.40	1.71	1.29	0	122.99
evm.model.scaffold_100.701	1.64	0.82	0.55	13.454
evm.model.scaffold_100.337	2	0.63	0.38	77.643
evm.model.scaffold_100.922	1.86	1	0.14	157.046
evm.model.scaffold_100.637	1.71	0.43	0.86	60.018
evm.model.scaffold_100.473	0.43	2.57	0	12.297
evm.model.scaffold_100.285	0	3	0	98.706
evm.model.scaffold_100.1765	1.14	1.03	0.83	20.227
evm.model.scaffold_100.833	1.62	0.81	0.58	19.454
evm.model.scaffold_100.414.1	1	0.8	1.2	33.74
evm.model.scaffold_100.1696	1.5	1	0.5	28.401
evm.model.scaffold_100.138	0.75	1.5	0.75	14.972
evm.model.scaffold_100.1421	1.4	0.63	0.98	49.572
evm.model.scaffold_100.1455	1.64	1.36	0	43.92
evm.model.scaffold_100.574	2.35	0.26	0.39	57.157
evm.model.scaffold_100.1153	1.5	0.68	0.82	13.098
evm.model.scaffold_100.1536	1.5	0.33	1.17	14.238
evm.model.scaffold_100.741	0.6	1.2	1.2	12.378
evm.model.scaffold_100.828	1.5	1.13	0.38	199.976
evm.model.scaffold_100.127	1.71	0.34	0.94	35.665
evm.model.scaffold_100.1160	1	1.5	0.5	81.843
evm.model.scaffold_100.1434	1.5	0.75	0.75	134.393
evm.model.scaffold_100.1135	0.86	1.29	0.86	28.734
evm.model.scaffold_100.1305.4	1.38	0.92	0.69	12.489
evm.model.scaffold_100.1638.2	1.84	0.48	0.68	23.781
evm.model.scaffold_100.871	0.64	1.29	1.07	44.885
evm.model.scaffold_100.290.1	1.66	0.24	1.11	49.806
evm.model.scaffold_100.652.1	1.71	0.43	0.86	23.131
evm.model.scaffold_100.345	1.88	1.13	0	21.871
evm.model.scaffold_100.1490	1.64	0.68	0.68	47.829
evm.model.scaffold_100.1619	0.6	1.8	0.6	10.464
evm.model.scaffold_100.217	1	0.33	1.67	51.201
evm.model.scaffold_100.1700	0	3	0	16.277
evm.model.scaffold_100.1253.2	1.53	0.28	1.19	19.459
evm.model.scaffold_100.413	1.64	0.55	0.82	41.219
evm.model.scaffold_100.182	1	1	1	25.417
evm.model.scaffold_100.708	2.5	0.5	0	12.236
evm.model.scaffold_100.1374	2.25	0.75	0	45.119
evm.model.scaffold_100.909	0.43	1.29	1.29	90.164
evm.model.scaffold_100.750	1.46	0.65	0.89	30.244
evm.model.scaffold_100.1316	1.31	0.38	1.31	52.699
evm.model.scaffold_100.1550	0.86	1.29	0.86	41.624
evm.model.scaffold_100.445	1.92	0.72	0.36	16.973
evm.model.scaffold_100.462.1	1.6	0.8	0.6	28.308
evm.model.scaffold_100.45	2	1	0	77.104
evm.model.scaffold_100.872	1.62	0.23	1.15	31.317
evm.model.scaffold_100.1223_evm.model.scaffold_100.1224	2.31	0.23	0.46	20.426
evm.model.scaffold_100.24	1.55	0.49	0.95	12.306
evm.model.scaffold_100.1749	1.64	1.09	0.27	12.887
evm.model.scaffold_100.1083	0	1.71	1.29	16.583
evm.model.scaffold_100.18	1	1.75	0.25	12.732
evm.model.scaffold_100.579	1.5	1.5	0	270.954
evm.model.scaffold_100.1146	1.2	0.9	0.9	24.729
evm.model.scaffold_100.344	0.6	1.6	0.8	45.523
evm.model.scaffold_100.221	2.25	0	0.75	14.786
evm.model.scaffold_100.1245	1.38	1.15	0.46	29.179
evm.model.scaffold_100.777	1.29	1.29	0.43	30.314
evm.model.scaffold_100.799	1.38	1.38	0.23	81.801
evm.model.scaffold_100.1412	1	1	1	12.472
evm.model.scaffold_100.1726	1.41	1.15	0.44	22.618
evm.model.scaffold_100.530	1.15	1.38	0.46	38.862
evm.model.scaffold_100.911	1.91	0.27	0.82	18.337
evm.model.scaffold_100.1024	1.8	0.53	0.67	61.419
evm.model.scaffold_100.1402	0.8	1.2	1	237.499
evm.model.scaffold_100.150	0.86	1.29	0.86	161.702
evm.model.scaffold_100.369	1.24	1.06	0.71	14.77
evm.model.scaffold_100.293	0.97	0.97	1.06	77.48
evm.model.scaffold_100.480	0.96	1.2	0.84	33.33
evm.model.scaffold_100.1298.1	0.69	2.08	0.23	77.02
evm.model.scaffold_100.770	0	0	3	77.733
evm.model.scaffold_100.72	1.2	0.6	1.2	2850.16
evm.model.scaffold_100.1453	1.91	0.41	0.68	16.177
evm.model.scaffold_100.222	0.83	1.17	1	45.439
evm.model.scaffold_100.739	2.33	0.33	0.33	45.108
evm.model.scaffold_100.1086	1.29	1.71	0	30.495
evm.model.scaffold_100.175	2.23	0.29	0.48	15.604
evm.model.scaffold_100.71	1.26	0.91	0.84	16.835
evm.model.scaffold_100.260.1	1.42	0.63	0.95	20.649
evm.model.scaffold_100.1080	1.55	0.39	1.06	20.244
evm.model.scaffold_100.1276	1.13	0.75	1.13	11.161
evm.model.scaffold_100.1025	2.4	0.6	0	19.046
evm.model.scaffold_100.1538	1.5	1.13	0.38	36.744
evm.model.scaffold_100.65	1.33	1	0.67	194.269
evm.model.scaffold_100.886	1	0.71	1.29	77.411
evm.model.scaffold_100.504	1.25	0	1.75	10.379
evm.model.scaffold_100.466	1.36	1.09	0.55	19.233
evm.model.scaffold_100.497	1.8	0.3	0.9	13.717
evm.model.scaffold_100.958	1.5	1.13	0.38	40.46
evm.model.scaffold_100.400	1.41	0.38	1.22	130.561
evm.model.scaffold_100.524	1.33	1	0.67	168.836
evm.model.scaffold_100.1280	2.04	0.36	0.6	10.157
evm.model.scaffold_100.649	1.39	0.8	0.8	15.618
evm.model.scaffold_100.449	1.6	1.12	0.28	11.779
evm.model.scaffold_100.551.1	0	0	3	61.354
evm.model.scaffold_100.1495	2.43	0.43	0.14	22.89
evm.model.scaffold_100.688	1.09	1.09	0.82	22.012
evm.model.scaffold_100.578.1	2	0.14	0.86	31.265
evm.model.scaffold_100.782	1.33	0.83	0.83	91.758
evm.model.scaffold_100.1629	1.56	0.72	0.72	251.461
evm.model.scaffold_100.126	1.09	0.55	1.36	55.959
evm.model.scaffold_100.403	0.5	2.5	0	181.237
evm.model.scaffold_100.1497	1.46	1.11	0.43	164.859
evm.model.scaffold_100.1819	0.56	2.44	0	29.393
evm.model.scaffold_100.1250	0.95	1.42	0.63	108.012
evm.model.scaffold_100.829	2	0.6	0.4	36.995
evm.model.scaffold_100.1124.3	1.7	1	0.3	51.577
evm.model.scaffold_100.66	1.45	0.29	1.26	11.083
evm.model.scaffold_100.1194	1.8	0.6	0.6	150.766
evm.model.scaffold_100.207	1.7	0.65	0.65	21.772
evm.model.scaffold_100.1035	1	1	1	16.817
evm.model.scaffold_100.1147	1.83	0.67	0.5	20.407
evm.model.scaffold_100.878	1.67	0.33	1	15.42
evm.model.scaffold_100.1045	1.2	0	1.8	218.415
evm.model.scaffold_100.322	1.5	0.9	0.6	20.738
evm.model.scaffold_100.1835	2	1	0	14.988
evm.model.scaffold_100.924	1.5	0.75	0.75	14.675
evm.model.scaffold_100.588	1.45	0.89	0.66	26.159
evm.model.scaffold_100.33	1.15	1.85	0	182.765
evm.model.scaffold_100.538	1.02	1.32	0.66	43.966
evm.model.scaffold_100.1771	1.2	1.6	0.2	17.658
evm.model.scaffold_100.691.1	1.76	0.71	0.53	24.675
evm.model.scaffold_100.82	1.44	0.72	0.84	15.532
evm.model.scaffold_100.557	1.16	0.97	0.87	15.378
evm.model.scaffold_100.1007	1.5	1.13	0.38	14.404
evm.model.scaffold_100.1105	1.22	0.47	1.31	127.854
evm.model.scaffold_100.1862	0.33	2.33	0.33	17.228
evm.model.scaffold_100.332	0.75	1.5	0.75	19.775
evm.model.scaffold_100.363	1.5	0.9	0.6	110.57
evm.model.scaffold_100.1747	1.2	1.2	0.6	168.202
evm.model.scaffold_100.1504	1	1	1	26.27
evm.model.scaffold_100.868	1.36	0.91	0.73	20.958
evm.model.scaffold_100.1282	1.2	0.9	0.9	15.045
evm.model.scaffold_100.281	1.38	0.23	1.38	173.734
evm.model.scaffold_100.1493	1.38	0.92	0.69	10.873
evm.model.scaffold_100.547	1.88	1.13	0	114.314
evm.model.scaffold_100.1778	1.43	0.86	0.71	17.113
evm.model.scaffold_100.573	0.86	2.14	0	152.336
evm.model.scaffold_100.220	1.29	0.86	0.86	33.659
evm.model.scaffold_100.402	1.2	1	0.8	11.611
evm.model.scaffold_100.1209	0.43	1.71	0.86	13.955
evm.model.scaffold_100.1743	0.38	2.63	0	35.305
evm.model.scaffold_100.55	1.27	0.4	1.33	29.214
evm.model.scaffold_100.1790	1.39	1.02	0.59	10.695
evm.model.scaffold_100.1334	1.8	1.2	0	31.665
evm.model.scaffold_100.1827	1.8	0.6	0.6	17.887
evm.model.scaffold_100.393	1.5	1.2	0.3	12.817
evm.model.scaffold_100.885	1.91	0.41	0.68	12.723
evm.model.scaffold_100.1090	0.6	1.8	0.6	11.386
evm.model.scaffold_100.191	0.71	1.14	1.14	12.12
evm.model.scaffold_100.279	1.85	1.15	0	42.634
evm.model.scaffold_100.784	1.23	0.77	1	34.443
evm.model.scaffold_100.1342	1.71	0.43	0.86	74.093
evm.model.scaffold_100.1293	1.32	0.59	1.1	25.577
evm.model.scaffold_100.180	1.5	0.86	0.64	277.65
evm.model.scaffold_100.145	1.8	1.2	0	18.877
evm.model.scaffold_100.1640	0.84	1.59	0.56	185.709
evm.model.scaffold_100.263_evm.model.scaffold_100.264	1.23	0.83	0.93	20.618
evm.model.scaffold_100.978	1.83	0.33	0.83	31.564
evm.model.scaffold_100.608	0.92	1.15	0.92	37.513
evm.model.scaffold_100.972	1.15	0.46	1.38	14.448
evm.model.scaffold_100.1358	1.09	1.91	0	13.173
evm.model.scaffold_100.408.2	1.14	0.72	1.14	16.979
evm.model.scaffold_100.642	1.42	1.11	0.47	48.585
evm.model.scaffold_100.155	1.5	1.25	0.25	81.14
evm.model.scaffold_100.888	2.25	0.38	0.38	12.256
evm.model.scaffold_100.1728	0.5	1	1.5	15.924
evm.model.scaffold_100.853	1.48	0.64	0.89	26.387
evm.model.scaffold_100.529	1	1.25	0.75	24.201
evm.model.scaffold_100.1370	1	0.5	1.5	28.951
evm.model.scaffold_100.700	0.83	1	1.17	88.434
evm.model.scaffold_100.1055	0.88	1.63	0.5	18.19
evm.model.scaffold_100.1760	1.36	1.64	0	177.58
evm.model.scaffold_100.378	1.62	0.92	0.46	18.283
evm.model.scaffold_100.536	1.6	0.8	0.6	26.225
evm.model.scaffold_100.1873	2.57	0.43	0	15.119
evm.model.scaffold_100.1431	1.5	0	1.5	36.848
evm.model.scaffold_100.716	0	2.7	0.3	54.49
evm.model.scaffold_100.188	2	0.67	0.33	353.322
evm.model.scaffold_111.119.1	1.5	1	0.5	13.366
evm.model.scaffold_111.80	1.8	0.84	0.36	12.025
evm.model.scaffold_111.41	1	1.33	0.67	65.365
evm.model.scaffold_111.111	1.62	0.69	0.69	25.364
evm.model.scaffold_111.296	1.29	1.29	0.43	19.653
evm.model.scaffold_111.190	1.43	0.43	1.14	16.832
evm.model.scaffold_111.417	1.61	0.59	0.8	35.359
evm.model.scaffold_111.9	1.5	0.71	0.79	104.918
evm.model.scaffold_111.349	1.05	0.97	0.97	17.358
evm.model.scaffold_111.432	1.32	0.48	1.2	12.461
evm.model.scaffold_111.323	0.97	0.87	1.16	50.63
evm.model.scaffold_111.30	0.84	0.94	1.22	21.755
evm.model.scaffold_111.419	1.46	0.95	0.59	43.344
evm.model.scaffold_111.97	1.6	0.6	0.8	97.545
evm.model.scaffold_111.98	1.6	0.63	0.77	36.642
evm.model.scaffold_111.92	1.57	1.17	0.26	32.062
evm.model.scaffold_111.59	0	1.5	1.5	38.745
evm.model.scaffold_111.408	1.57	0.65	0.78	53.787
evm.model.scaffold_111.6	1.55	0.52	0.93	15.26
evm.model.scaffold_111.281	0.6	1.2	1.2	35.723
evm.model.scaffold_111.372	0.75	1.88	0.38	34.651
evm.model.scaffold_111.283	2.1	0	0.9	33.201
evm.model.scaffold_111.298	0	3	0	75.859
evm.model.scaffold_111.345	1.65	0.76	0.59	24.809
evm.model.scaffold_111.19	1.47	0.52	1.01	28.029
evm.model.scaffold_111.336	0.86	1.5	0.64	152.962
evm.model.scaffold_111.335	1.5	0.69	0.81	10.596
evm.model.scaffold_111.293	1.31	0.54	1.15	35.589
evm.model.scaffold_111.412	1.5	1	0.5	159.673
evm.model.scaffold_111.195	0	3	0	110.671
evm.model.scaffold_111.122	1.61	1.1	0.29	21.05
evm.model.scaffold_111.387	1.14	0.71	1.14	28.577
evm.model.scaffold_111.442	1.33	1.67	0	43.773
evm.model.scaffold_111.75	0.88	1.75	0.38	14.622
evm.model.scaffold_111.354	1.5	0.75	0.75	55.971
evm.model.scaffold_111.45	1.36	1.36	0.27	24.627
evm.model.scaffold_111.313	1.75	0	1.25	32.115
evm.model.scaffold_111.381	1.5	0.75	0.75	41.698
evm.model.scaffold_111.60	0.63	1.89	0.47	16.139
evm.model.scaffold_111.93	1.57	0.57	0.86	12.403
evm.model.scaffold_111.24	0.88	1.41	0.71	26.479
evm.model.scaffold_111.37.1	1.71	0.43	0.86	49.766
evm.model.scaffold_111.25	1.71	0.54	0.75	16.52
evm.model.scaffold_111.137	1.14	0.71	1.14	215.046
evm.model.scaffold_111.71	1.59	1.24	0.18	56.777
evm.model.scaffold_111.264	1.31	0.94	0.75	40.678
evm.model.scaffold_111.141	1.47	0.93	0.6	11.695
evm.model.scaffold_111.31	1.38	0.92	0.69	21.148
evm.model.scaffold_111.276_evm.model.scaffold_111.275	1.43	0.65	0.91	13.692
evm.model.scaffold_111.321	1.11	0.63	1.26	14.407
evm.model.scaffold_111.162	1.71	0.21	1.07	11.703
evm.model.scaffold_111.386	0.33	2.67	0	36.156
evm.model.scaffold_111.84	0.86	1.07	1.07	12.302
evm.model.scaffold_111.171	1.73	0.87	0.4	11.998
evm.model.scaffold_111.126	1.29	0.51	1.2	10.661
evm.model.scaffold_111.132	0.5	1	1.5	13.72
evm.model.scaffold_111.127	1.05	0.9	1.05	29.335
evm.model.scaffold_111.81	1.88	0.38	0.75	20.046
evm.model.scaffold_111.34.1	1.65	0.58	0.77	33.378
evm.model.scaffold_111.53	1.5	1.29	0.21	71.747
evm.model.scaffold_111.340	1.13	0.75	1.13	39.099
evm.model.scaffold_111.269	0.83	0.83	1.33	30.698
evm.model.scaffold_111.268	2	0	1	36.07
evm.model.scaffold_111.399	1.33	1.67	0	36.649
evm.model.scaffold_111.250	1.34	0.71	0.95	10.195
evm.model.scaffold_111.208	0.6	2.4	0	16.367
evm.model.scaffold_111.401	1.63	0.25	1.13	11.489
evm.model.scaffold_111.316	2.1	0.75	0.15	237.597
evm.model.scaffold_111.297	1.2	0.9	0.9	31.406
evm.model.scaffold_111.373	0.55	1.36	1.09	68.415
evm.model.scaffold_111.331	1.5	0.88	0.62	36.741
evm.model.scaffold_111.415	1.15	1.62	0.23	116.47
evm.model.scaffold_111.291	1.08	0.48	1.44	12.674
evm.model.scaffold_111.355	1.91	0.55	0.55	49.523
evm.model.scaffold_111.304	1.8	0.7	0.5	33.534
evm.model.scaffold_111.371	1.09	1.64	0.27	27.104
evm.model.scaffold_111.32	1.67	0.56	0.78	20.495
evm.model.scaffold_111.67	1.64	0.55	0.82	154.088
evm.model.scaffold_111.70	1.82	0.47	0.71	16.271
evm.model.scaffold_111.62	1.58	0.32	1.11	13.373
evm.model.scaffold_111.346	1.8	0.4	0.8	20.321
evm.model.scaffold_111.193	1.33	1	0.67	14.027
evm.model.scaffold_111.270	1.05	0.82	1.13	30.495
evm.model.scaffold_111.279	1.39	0.43	1.18	15.118
evm.model.scaffold_111.128	2	0.6	0.4	29.938
evm.model.scaffold_111.18	0.8	1.4	0.8	35.958
evm.model.scaffold_111.36	0	0	0	27.495
evm.model.scaffold_111.420	1.71	0.57	0.71	21.604
evm.model.scaffold_111.142	0	2.25	0.75	75.388
evm.model.scaffold_111.299.1	1.06	1.41	0.53	83.035
evm.model.scaffold_111.274	1.18	0.95	0.87	22.63
evm.model.scaffold_111.170	0.64	1.5	0.86	54.613
evm.model.scaffold_111.116	1.57	0.65	0.78	11.054
evm.model.scaffold_111.289	0.82	1.91	0.27	16.448
evm.model.scaffold_111.63	1.8	0.15	1.05	20.757
evm.model.scaffold_111.46	2.33	0.5	0.17	51.015
evm.model.scaffold_111.285	1.8	0.7	0.5	32.459
evm.model.scaffold_111.351	0.9	1.8	0.3	54.701
evm.model.scaffold_111.15	1.54	0.62	0.85	11.766
evm.model.scaffold_111.61	1.11	0.63	1.26	19.498
evm.model.scaffold_111.236	1.36	1.09	0.55	36.739
evm.model.scaffold_111.196	1.34	0.62	1.03	12.362
evm.model.scaffold_111.110	0.92	1.15	0.92	11.258
evm.model.scaffold_111.147	0.35	1.59	1.06	166.594
evm.model.scaffold_111.103	1.64	1.36	0	719.196
evm.model.scaffold_111.254	1.8	0.6	0.6	31.727
evm.model.scaffold_111.78	1	1.5	0.5	43.476
evm.model.scaffold_111.352.4	1.6	0.2	1.2	28.675
evm.model.scaffold_111.160	1.44	1.32	0.24	530.064
evm.model.scaffold_111.267	1.5	1.5	0	19.504
evm.model.scaffold_111.260_evm.model.scaffold_111.261	1.38	1.15	0.46	25.259
evm.model.scaffold_111.385	1.46	1.03	0.51	21.455
evm.model.scaffold_111.398	1.58	0.79	0.63	39.045
evm.model.scaffold_111.69	0.6	1	1.4	10.489
evm.model.scaffold_111.44	1.13	1.5	0.38	347.489
evm.model.scaffold_111.290	1.8	0.6	0.6	16.105
evm.model.scaffold_111.198	1.8	0.6	0.6	11.702
evm.model.scaffold_111.319	1.13	1.5	0.38	10.735
evm.model.scaffold_111.390.2	1.4	0.6	1	130.203
evm.model.scaffold_23.103	1.83	0.17	1	14.351
evm.model.scaffold_23.16	0.38	1.88	0.75	29.278
evm.model.scaffold_23.92.1	1.69	0.19	1.13	356.697
evm.model.scaffold_23.45	1.8	0.45	0.75	17.461
evm.model.scaffold_23.49	0.67	2.33	0	18.174
evm.model.scaffold_23.93	2	0	1	20.432
evm.model.scaffold_23.22	1.64	0.68	0.68	32.917
evm.model.scaffold_23.25.1	1.5	1.5	0	84.389
evm.model.scaffold_23.36	0.95	1.5	0.55	22.217
evm.model.scaffold_23.12	1.43	0.57	1	31.929
evm.model.scaffold_23.7	1.32	0.6	1.08	17.189
evm.model.scaffold_23.17	1.69	0.75	0.56	21.705
evm.model.scaffold_23.2	1.71	0.54	0.75	33.004
evm.model.scaffold_23.6	1.73	0.55	0.73	12.526
evm.model.scaffold_23.18	0.67	1.67	0.67	19.747
evm.model.scaffold_23.8	1.5	0.33	1.17	28.413
evm.model.scaffold_23.90	2.33	0.67	0	29.288
evm.model.scaffold_23.48	1	1.5	0.5	13.129
evm.model.scaffold_335.40	1.62	0.46	0.92	26.168
evm.model.scaffold_335.11	1.33	1.33	0.33	10.094
evm.model.scaffold_335.9	1.75	0.75	0.5	83.103
evm.model.scaffold_335.32	1.44	0.96	0.6	26.984
evm.model.scaffold_335.53	1.13	1.13	0.75	89.319
evm.model.scaffold_335.24	1.31	1.13	0.56	19.59
evm.model.scaffold_335.12	1.5	1.5	0	24.233
evm.model.scaffold_335.8	0.25	2.75	0	74.953
evm.model.scaffold_335.34	0.96	1.8	0.24	33.903
evm.model.scaffold_335.30	1.76	0.35	0.88	22.451
evm.model.scaffold_335.23	1.5	0.25	1.25	15.786
evm.model.scaffold_335.5	0.86	0.86	1.29	11.28
evm.model.scaffold_335.47	2.47	0.18	0.35	10.281
evm.model.scaffold_335.1	1.09	0.82	1.09	40.658
evm.model.scaffold_335.26.2	1.17	0.75	1.08	24.77
evm.model.scaffold_335.6	1	1	1	11.083
evm.model.scaffold_181.28	1.5	0.25	1.25	12.149
evm.model.scaffold_181.19	2.4	0.2	0.4	26.723
evm.model.scaffold_181.20	1.8	0.6	0.6	36.724
evm.model.scaffold_181.11	0.75	1.75	0.5	569.931
evm.model.scaffold_181.24	1.5	0.5	1	10.327
evm.model.scaffold_181.44	1.5	0.96	0.54	11.829
evm.model.scaffold_181.56	2.33	0	0.67	130.005
evm.model.scaffold_181.60	0.33	2	0.67	69.066
evm.model.scaffold_181.55	0.35	1.76	0.88	15.536
evm.model.scaffold_181.15	1.42	1.11	0.47	22.03
evm.model.scaffold_181.32	1.3	1.17	0.52	14.921
evm.model.scaffold_6.5	0	0.75	2.25	10.874
evm.model.scaffold_31.82	1.2	0	1.8	29.092
evm.model.scaffold_31.78	1.66	0.52	0.83	11.413
evm.model.scaffold_31.26	1.5	1	0.5	17.917
evm.model.scaffold_31.8	1.35	0.6	1.05	56.604
evm.model.scaffold_31.63	1.13	0.75	1.13	49.038
evm.model.scaffold_31.10	0.88	1.41	0.71	19.915
evm.model.scaffold_31.100	1.2	1.2	0.6	234.02
evm.model.scaffold_31.21	1.5	0.5	1	391.846
evm.model.scaffold_31.25	1.02	1.02	0.95	10.573
evm.model.scaffold_31.64	1.38	0.69	0.92	13.415
evm.model.scaffold_31.118	1.8	1.2	0	672.478
evm.model.scaffold_31.22	0.75	1.88	0.38	120.716
evm.model.scaffold_31.124	0.64	1.93	0.43	60.215
evm.model.scaffold_31.77	1.29	1.71	0	840.892
evm.model.scaffold_31.19	1.5	0.38	1.13	119.592
evm.model.scaffold_31.35	0.97	0.65	1.38	16.782
evm.model.scaffold_160.14	1.55	0.58	0.87	15.712
evm.model.scaffold_160.19	0.94	1.24	0.82	26.54
evm.model.scaffold_160.13	1.38	0.69	0.92	23.273
evm.model.scaffold_160.7	1.71	0.43	0.86	35.276
evm.model.scaffold_160.25	1.29	0.86	0.86	54.134
evm.model.scaffold_160.1	2.05	0.47	0.47	23.2
evm.model.scaffold_160.6	1.71	0.86	0.43	43.346
evm.model.scaffold_421.3	1.78	0.83	0.39	14.836
evm.model.scaffold_1.2	0.5	1	1.5	11.393
evm.model.scaffold_3.32	1.65	0.77	0.58	19.354
evm.model.scaffold_3.66	1.36	1.09	0.55	12.218
evm.model.scaffold_3.15	1.42	0.92	0.67	12.805
evm.model.scaffold_3.31	1.58	0.79	0.63	10.844
evm.model.scaffold_3.71	1.39	0.73	0.88	11.052
evm.model.scaffold_3.85	1.54	0.69	0.77	12.646
evm.model.scaffold_3.45	0	3	0	14.528
evm.model.scaffold_189.19	1.86	0.86	0.29	16.407
evm.model.scaffold_189.39	1.07	0.86	1.07	11.104
evm.model.scaffold_189.86	1.5	0.46	1.04	50.35
evm.model.scaffold_189.31	1.91	0.55	0.55	25.316
evm.model.scaffold_189.11	0.9	0.6	1.5	77.597
evm.model.scaffold_189.88	1.38	0.46	1.15	14.082
evm.model.scaffold_189.82	0.9	1.5	0.6	102.259
evm.model.scaffold_189.34	0.86	0.75	1.39	128.233
evm.model.scaffold_189.40	1.88	0.13	1	11.909
evm.model.scaffold_189.91	0.43	0.86	1.71	14.707
evm.model.scaffold_189.97	0	1.2	1.8	17.527
evm.model.scaffold_189.100	1.29	0.86	0.86	17.094
evm.model.scaffold_189.18	1.86	0.57	0.57	29.808
evm.model.scaffold_189.26	1.29	0.21	1.5	10.657
evm.model.scaffold_189.46	1	1	1	37.825
evm.model.scaffold_189.24	0.94	1.88	0.19	88.13
evm.model.scaffold_189.72	0	1.5	1.5	23.273
evm.model.scaffold_189.14	1.69	0.75	0.56	74.78
evm.model.scaffold_189.76	1.41	1.24	0.35	44.235
evm.model.scaffold_189.85	1.88	0.94	0.19	24.42
evm.model.scaffold_189.55	1.56	0.56	0.89	12.846
evm.model.scaffold_189.71	1.2	1.8	0	21.682
evm.model.scaffold_189.62	1.5	0.75	0.75	13.603
evm.model.scaffold_189.98	1	1.5	0.5	29.903
evm.model.scaffold_189.89	0	3	0	58.281
evm.model.scaffold_189.38	2	0.4	0.6	22.422
evm.model.scaffold_189.45	1.17	0.91	0.91	54.874
evm.model.scaffold_189.75	1	1	1	86.27
evm.model.scaffold_394.385	0.86	0.86	1.29	10.612
evm.model.scaffold_394.141	2	1	0	60.044
evm.model.scaffold_394.537	0.83	2	0.17	235.313
evm.model.scaffold_394.92	1.37	1.63	0	143.287
evm.model.scaffold_394.320	1.65	0.48	0.87	19.789
evm.model.scaffold_394.291	1.41	0.71	0.88	59.039
evm.model.scaffold_394.65	1.15	0.69	1.15	47.28
evm.model.scaffold_394.184	1.2	1.2	0.6	192.107
evm.model.scaffold_394.5	1.29	0.86	0.86	11.169
evm.model.scaffold_394.421	1.5	1.2	0.3	41.899
evm.model.scaffold_394.176	1.64	0.95	0.41	10.544
evm.model.scaffold_394.272	1.71	0.86	0.43	62.986
evm.model.scaffold_394.536	0.75	1.05	1.2	14.064
evm.model.scaffold_394.180	1.68	0.6	0.72	41.008
evm.model.scaffold_394.195	0	3	0	89.703
evm.model.scaffold_394.369	1.5	0.53	0.97	11.009
evm.model.scaffold_394.185	2.5	0.5	0	201.135
evm.model.scaffold_394.319	0.86	1.93	0.21	48.259
evm.model.scaffold_394.162	1.88	0.38	0.75	113.701
evm.model.scaffold_394.429	2.5	0.5	0	17.435
evm.model.scaffold_394.40	1.8	1.2	0	33.186
evm.model.scaffold_394.104.1	1.11	0.63	1.26	60.189
evm.model.scaffold_394.67	2.5	0.5	0	32.945
evm.model.scaffold_394.508	0.67	1.17	1.17	20.7
evm.model.scaffold_394.22	0.92	1.27	0.81	72.871
evm.model.scaffold_394.170	1.74	0.48	0.77	30.07
evm.model.scaffold_394.563	1.5	1.29	0.21	69.156
evm.model.scaffold_394.527	2.5	0.25	0.25	137.265
evm.model.scaffold_394.181	1.5	1.25	0.25	43.526
evm.model.scaffold_394.490	1.44	0.78	0.78	49.711
evm.model.scaffold_394.77	0.71	2.29	0	28.084
evm.model.scaffold_394.292	1.67	0.33	1	26.68
evm.model.scaffold_394.496_evm.model.scaffold_394.497	1.11	0.16	1.74	60.767
evm.model.scaffold_394.152	0.43	2.57	0	143.551
evm.model.scaffold_394.270	1.4	0.8	0.8	12.855
evm.model.scaffold_394.309.2	1.57	0.72	0.72	155.297
evm.model.scaffold_394.182	0.88	1	1.13	15.392
evm.model.scaffold_394.529	1.57	0.5	0.93	15.484
evm.model.scaffold_394.146	0.43	0	2.57	41.757
evm.model.scaffold_394.495	1.31	0.54	1.15	10.504
evm.model.scaffold_394.342	1.36	1.09	0.55	167.958
evm.model.scaffold_394.441	1.64	0.55	0.82	63.242
evm.model.scaffold_394.557	2.1	0.3	0.6	41.964
evm.model.scaffold_394.553	1.23	0.55	1.23	44.799
evm.model.scaffold_394.335	1.85	0.69	0.46	10.526
evm.model.scaffold_394.428	0.86	0	2.14	38.206
evm.model.scaffold_394.387	0	2.25	0.75	170.838
evm.model.scaffold_394.351	1	1.25	0.75	12.864
evm.model.scaffold_394.163	1.41	0.71	0.88	50.403
evm.model.scaffold_394.58	1	1.67	0.33	17.168
evm.model.scaffold_394.399	1.41	0.82	0.76	20.928
evm.model.scaffold_394.535.1	1.42	0.87	0.71	81.998
evm.model.scaffold_394.547	0.75	0.84	1.41	14.716
evm.model.scaffold_394.458	1.76	0.72	0.52	21.083
evm.model.scaffold_394.8	1.58	0.74	0.68	10.094
evm.model.scaffold_394.131	1.57	1.04	0.39	37.584
evm.model.scaffold_394.459	2.4	0.6	0	36.113
evm.model.scaffold_394.353.2	1.53	0.4	1.08	13.486
evm.model.scaffold_394.264	1.2	0.6	1.2	21.583
evm.model.scaffold_394.147	1.2	1.05	0.75	49.839
evm.model.scaffold_394.119	1.29	0.71	1	13.583
evm.model.scaffold_394.519	1.25	1.5	0.25	11.277
evm.model.scaffold_394.290	2.32	0.27	0.41	11.563
evm.model.scaffold_394.517	2.14	0.43	0.43	30.63
evm.model.scaffold_394.328	1.09	1.64	0.27	143.976
evm.model.scaffold_394.372	0.91	1.17	0.91	27.496
evm.model.scaffold_394.348	1.33	0.67	1	78.092
evm.model.scaffold_394.20	0.71	0.86	1.43	75.435
evm.model.scaffold_394.35	1.05	1.65	0.3	31.506
evm.model.scaffold_394.114	1.5	1.5	0	39.083
evm.model.scaffold_394.463	1.88	0.75	0.38	74.047
evm.model.scaffold_394.167	0	2.4	0.6	19.171
evm.model.scaffold_394.173	0.94	1.13	0.94	80.774
evm.model.scaffold_394.395	1.91	0.41	0.68	14.444
evm.model.scaffold_394.365	0.83	1.67	0.5	12.127
evm.model.scaffold_394.410	1.38	0.92	0.69	59.014
evm.model.scaffold_394.424	1.5	1.07	0.43	654.145
evm.model.scaffold_394.214	1.33	0.89	0.78	11.818
evm.model.scaffold_394.28	0.5	2	0.5	23.424
evm.model.scaffold_394.134	1.88	0.56	0.56	42.397
evm.model.scaffold_394.135	1.07	1.93	0	105.393
evm.model.scaffold_394.312	1.78	0.56	0.67	42.427
evm.model.scaffold_394.68	3	0	0	122.274
evm.model.scaffold_394.212	1.38	0.59	1.03	30.825
evm.model.scaffold_394.273	1.05	1.5	0.45	12.535
evm.model.scaffold_394.357	1.29	1.07	0.64	13.251
evm.model.scaffold_394.36	1.65	0.75	0.6	24.749
evm.model.scaffold_394.108	1.38	0.66	0.96	45.399
evm.model.scaffold_394.405	1.5	0.45	1.05	17.07
evm.model.scaffold_394.346	0.6	1.8	0.6	10.351
evm.model.scaffold_394.11	1.33	1.17	0.5	49.021
evm.model.scaffold_394.226	0.83	0.5	1.67	54.384
evm.model.scaffold_394.389	1.34	0.75	0.91	20.08
evm.model.scaffold_394.337	2.09	0.26	0.65	55.205
evm.model.scaffold_394.265	1.08	1.44	0.48	46.229
evm.model.scaffold_394.59	0	3	0	396.268
evm.model.scaffold_394.288	1.63	0.75	0.63	27.972
evm.model.scaffold_394.445	1.59	0.79	0.62	15.385
evm.model.scaffold_394.518	1.36	1.43	0.21	338.811
evm.model.scaffold_394.564	1.31	0.94	0.75	20.9
evm.model.scaffold_394.440	1.67	0.83	0.5	10.488
evm.model.scaffold_394.340	1.4	0.7	0.89	10.919
evm.model.scaffold_394.394	1.5	0.19	1.31	25.215
evm.model.scaffold_394.350	1.63	1	0.38	63.837
evm.model.scaffold_394.150	1.8	0.9	0.3	91.868
evm.model.scaffold_394.43	0.43	1.07	1.5	20.155
evm.model.scaffold_394.502	1.11	1.16	0.74	21.033
evm.model.scaffold_394.388	0.39	2.22	0.39	12.359
evm.model.scaffold_394.451	0.6	0.6	1.8	29.211
evm.model.scaffold_394.522	0.75	1.88	0.38	112.923
evm.model.scaffold_394.383	1.88	0.63	0.5	21.671
evm.model.scaffold_394.362	1.32	0.6	1.08	136.347
evm.model.scaffold_394.416	1.6	1	0.4	21.347
evm.model.scaffold_394.192	1.29	1.57	0.14	19.926
evm.model.scaffold_394.330	1.2	1	0.8	28.689
evm.model.scaffold_394.126	1.1	1.1	0.8	23.19
evm.model.scaffold_394.464	1.8	0.6	0.6	91.14
evm.model.scaffold_394.120	0.5	1.5	1	10.344
evm.model.scaffold_394.442	1.67	0.67	0.67	68.634
evm.model.scaffold_394.548	0.43	2.14	0.43	13.044
evm.model.scaffold_394.382	2.67	0	0.33	952.058
evm.model.scaffold_394.138.1	1.35	0.47	1.18	16.9
evm.model.scaffold_394.512	1.69	0.94	0.38	26.105
evm.model.scaffold_394.400	1.23	1.23	0.55	184.065
evm.model.scaffold_394.66	1.55	0.91	0.55	90.925
evm.model.scaffold_394.132	1.67	0.63	0.7	12.625
evm.model.scaffold_394.154	0.75	1.5	0.75	334.172
evm.model.scaffold_394.412.1	2	0.85	0.15	365.343
evm.model.scaffold_394.149	1.47	0.49	1.05	11.255
evm.model.scaffold_394.555	1.4	0.2	1.4	14.003
evm.model.scaffold_394.63	1.5	0.56	0.94	34.395
evm.model.scaffold_394.552	1.5	0.45	1.05	379.606
evm.model.scaffold_394.39	0.75	1.5	0.75	48.154
evm.model.scaffold_394.140	1.76	0.35	0.88	44.481
evm.model.scaffold_394.128	1	1	1	24.169
evm.model.scaffold_394.551	1.44	0.78	0.78	23.387
evm.model.scaffold_394.52	1.55	0.73	0.73	10.761
evm.model.scaffold_394.300	1.03	0.75	1.22	24.083
evm.model.scaffold_394.452	0.6	0.6	1.8	38.519
evm.model.scaffold_394.136.1	0.38	1.88	0.75	34.628
evm.model.scaffold_394.413	1.65	0.86	0.49	27.718
evm.model.scaffold_394.165	1.13	0.75	1.13	27.223
evm.model.scaffold_394.446	0.91	1.04	1.04	19.32
evm.model.scaffold_394.95	0.82	2.18	0	30.233
evm.model.scaffold_394.225	1.88	0	1.13	12.654
evm.model.scaffold_394.384	1.6	0.8	0.6	50.064
evm.model.scaffold_394.112	1.91	0.82	0.27	17.73
evm.model.scaffold_394.151	1.29	1.29	0.43	36.008
evm.model.scaffold_394.531	2.18	0.55	0.27	21.438
evm.model.scaffold_394.352	1.13	1.5	0.38	334.032
evm.model.scaffold_394.558	0.92	1.15	0.92	2105.94
evm.model.scaffold_394.44	1.83	0.83	0.33	69.388
evm.model.scaffold_394.235	1.25	1.13	0.63	40.715
evm.model.scaffold_394.183	1.64	0.82	0.55	128.095
evm.model.scaffold_394.499	1.5	0.75	0.75	112.6
evm.model.scaffold_394.208	1.2	1.2	0.6	156.884
evm.model.scaffold_394.110	1.62	0.53	0.85	15.972
evm.model.scaffold_394.116	1.35	0.9	0.75	10.517
evm.model.scaffold_394.4	0.94	0.56	1.5	12.819
evm.model.scaffold_394.431	1.5	1.5	0	14.74
evm.model.scaffold_394.80.1	1.4	0.6	1	55.5
evm.model.scaffold_394.153	1.11	1.58	0.32	31.714
evm.model.scaffold_394.541	1.57	1.3	0.13	73.863
evm.model.scaffold_394.148	1.91	1.09	0	100.152
evm.model.scaffold_394.121	0.38	1.88	0.75	14.418
evm.model.scaffold_394.514.1	1.45	0.73	0.82	18.828
evm.model.scaffold_47.3	1.5	0.75	0.75	24.769
evm.model.scaffold_44.272	0	2.25	0.75	18.69
evm.model.scaffold_44.496	0.5	1.5	1	47.619
evm.model.scaffold_44.38	0.69	0.69	1.62	35.968
evm.model.scaffold_44.245	1.4	0.6	1	17.826
evm.model.scaffold_44.468	1.36	0.55	1.09	11.022
evm.model.scaffold_44.135	0.92	0.92	1.15	29.662
evm.model.scaffold_44.474	1.8	1.2	0	52.511
evm.model.scaffold_44.358	1.58	0.54	0.88	10.594
evm.model.scaffold_44.361	1.43	1.14	0.43	14.762
evm.model.scaffold_44.520	0.82	1.91	0.27	51.131
evm.model.scaffold_44.50	0.88	0.5	1.63	11.666
evm.model.scaffold_44.433	1.29	0.86	0.86	13.785
evm.model.scaffold_44.87	0.75	2.25	0	53.771
evm.model.scaffold_44.118	2.5	0.5	0	22.838
evm.model.scaffold_44.383	1.5	0.9	0.6	13.308
evm.model.scaffold_44.216	1.43	0.71	0.86	16.137
evm.model.scaffold_44.347	0.94	0.75	1.31	31.861
evm.model.scaffold_44.449	1	1.4	0.6	32.135
evm.model.scaffold_44.258	0.43	2.14	0.43	57.986
evm.model.scaffold_44.403	1.3	1.17	0.52	131.432
evm.model.scaffold_44.122	0.38	1.5	1.13	1544.53
evm.model.scaffold_44.69	1.06	0.88	1.06	11.887
evm.model.scaffold_44.379	0.82	1.64	0.55	326.863
evm.model.scaffold_44.48	1.5	0.86	0.64	20.378
evm.model.scaffold_44.219	2.14	0.86	0	70.364
evm.model.scaffold_44.33	1.88	0.56	0.56	10.904
evm.model.scaffold_44.42	0	1.36	1.64	15.272
evm.model.scaffold_44.243	1.62	0.46	0.92	55.337
evm.model.scaffold_44.273	1.8	0.3	0.9	22.678
evm.model.scaffold_44.304	0.6	1.2	1.2	10.235
evm.model.scaffold_44.287	0.64	1.29	1.07	27.036
evm.model.scaffold_44.170	1.67	0.67	0.67	21.07
evm.model.scaffold_44.390	1.89	0.33	0.78	28.679
evm.model.scaffold_44.173	1.27	1.42	0.3	15.21
evm.model.scaffold_44.335_evm.model.scaffold_44.336	1.38	0.66	0.96	34.332
evm.model.scaffold_44.24	1.33	0.83	0.83	22.753
evm.model.scaffold_44.213	0.69	1.15	1.15	11.662
evm.model.scaffold_44.244	1.2	0.9	0.9	165.418
evm.model.scaffold_44.109	1.38	1.04	0.58	11.31
evm.model.scaffold_44.257	1.5	0.9	0.6	56.816
evm.model.scaffold_44.476	1.24	0.93	0.83	30.894
evm.model.scaffold_44.454	1.29	0.43	1.29	13.607
evm.model.scaffold_44.35	1.45	0.48	1.06	17.992
evm.model.scaffold_44.128.1	1.07	0.64	1.29	12.551
evm.model.scaffold_44.512	1.74	0.97	0.29	32.226
evm.model.scaffold_44.282	0	3	0	24.939
evm.model.scaffold_44.368	1.39	0.32	1.29	10.248
evm.model.scaffold_44.108	1.96	0.92	0.12	28.007
evm.model.scaffold_44.256	1.57	1.11	0.33	45.76
evm.model.scaffold_44.401	0.6	0.9	1.5	443.558
evm.model.scaffold_44.348	1.06	0.88	1.06	17.205
evm.model.scaffold_44.137	1.76	0.53	0.71	18.65
evm.model.scaffold_44.505	1.34	0.79	0.87	98.374
evm.model.scaffold_44.79	1.38	1.04	0.58	41.738
evm.model.scaffold_44.382	2.25	0.5	0.25	10.818
evm.model.scaffold_44.136	2.06	0.75	0.19	14.809
evm.model.scaffold_44.504	1.5	1.13	0.38	34.399
evm.model.scaffold_44.186.1	2	1	0	104.368
evm.model.scaffold_44.115	1.06	1.94	0	267.287
evm.model.scaffold_44.290	1.5	1.5	0	16.063
evm.model.scaffold_44.250	1.3	0.8	0.9	143.926
evm.model.scaffold_44.58	2.14	0	0.86	10.271
evm.model.scaffold_44.399	1.72	0.44	0.84	29.313
evm.model.scaffold_44.503	1.43	0.68	0.89	24.023
evm.model.scaffold_44.525	1.36	0.64	1	17.114
evm.model.scaffold_44.308	0.33	2	0.67	20.983
evm.model.scaffold_44.373	1	1	1	63.461
evm.model.scaffold_44.489	1.13	1.5	0.38	142.816
evm.model.scaffold_44.427	1.91	0.82	0.27	11.603
evm.model.scaffold_44.154	1.89	0.63	0.47	20.626
evm.model.scaffold_44.350	1.88	0.53	0.59	35.417
evm.model.scaffold_44.330	1.17	1	0.83	76.132
evm.model.scaffold_44.193	1.45	0.52	1.03	10.894
evm.model.scaffold_44.283	1.54	0.51	0.95	21.143
evm.model.scaffold_44.527	1.6	0.52	0.88	21.492
evm.model.scaffold_44.305	2.4	0.6	0	10.667
evm.model.scaffold_44.60	1.6	1	0.4	34.106
evm.model.scaffold_44.29	1	1	1	11.763
evm.model.scaffold_44.491	1.63	0.75	0.63	16.094
evm.model.scaffold_44.469	1.4	0.8	0.8	24.9
evm.model.scaffold_44.224	2.14	0.86	0	50.172
evm.model.scaffold_44.483	1.13	0.75	1.13	17.067
evm.model.scaffold_44.375	2	0.33	0.67	76.153
evm.model.scaffold_44.112	1	1	1	138.258
evm.model.scaffold_44.255	1.33	1.33	0.33	37.685
evm.model.scaffold_44.362	1.08	1.08	0.83	44.772
evm.model.scaffold_44.492	1.5	0.38	1.13	144.429
evm.model.scaffold_44.310	1.56	0.89	0.56	22.307
evm.model.scaffold_44.23	1.65	0.45	0.9	25.812
evm.model.scaffold_44.384	0.9	1.5	0.6	49.245
evm.model.scaffold_44.168	1.33	1.06	0.61	27.981
evm.model.scaffold_44.116	1.88	1.13	0	29.926
evm.model.scaffold_44.119	1.42	0.79	0.79	14.928
evm.model.scaffold_44.331	1.25	1	0.75	104.161
evm.model.scaffold_44.515	0.75	1.75	0.5	70.955
evm.model.scaffold_44.155	1.81	0.5	0.69	22.26
evm.model.scaffold_44.470	1.57	0.65	0.78	10.987
evm.model.scaffold_44.86	1.64	0.55	0.82	110.48
evm.model.scaffold_44.88	0.9	0.3	1.8	15.068
evm.model.scaffold_44.77	1.03	1.03	0.93	107.994
evm.model.scaffold_44.465	1.13	1.5	0.38	12.419
evm.model.scaffold_44.428	1.46	1.11	0.43	16.145
evm.model.scaffold_44.429	1.24	0.72	1.04	13.26
evm.model.scaffold_44.90	1.78	0.38	0.84	24.317
evm.model.scaffold_44.241	0.6	1.2	1.2	306.458
evm.model.scaffold_44.400	1.64	0	1.36	164.473
evm.model.scaffold_44.372	2	0.43	0.57	179.318
evm.model.scaffold_44.265	1.91	0.82	0.27	18.2
evm.model.scaffold_44.451	2.67	0	0.33	16.562
evm.model.scaffold_44.286	1.38	1.38	0.23	43.938
evm.model.scaffold_44.102.1	1.38	0.92	0.69	19.232
evm.model.scaffold_44.338	1.42	0.47	1.11	15.957
evm.model.scaffold_44.374	1.5	0	1.5	111.309
evm.model.scaffold_44.511	1.71	0.86	0.43	54.591
evm.model.scaffold_44.344	1.58	0.95	0.47	32.558
evm.model.scaffold_44.309.2	1.39	0.67	0.94	16.284
evm.model.scaffold_44.447	1.24	1.45	0.31	11.713
evm.model.scaffold_44.131	0.83	1.5	0.67	56.644
evm.model.scaffold_44.464	1.73	1.15	0.12	29.28
evm.model.scaffold_44.54	0.75	1.69	0.56	14.304
evm.model.scaffold_44.39	1.36	0.82	0.82	29.43
evm.model.scaffold_44.461	1.31	0.56	1.13	23.516
evm.model.scaffold_44.291	1.94	0.77	0.29	22.53
evm.model.scaffold_44.249	1.17	0.83	1	83.449
evm.model.scaffold_16.12	1	2	0	106.94
evm.model.scaffold_16.13	1.64	0.82	0.55	10.734
evm.model.scaffold_16.8	1.42	0.51	1.07	20.662
evm.model.scaffold_64.22	1.33	1.5	0.17	24.522
evm.model.scaffold_64.60	0.6	1.2	1.2	22.79
evm.model.scaffold_64.30	1.5	1.13	0.38	10.976
evm.model.scaffold_64.38	2.25	0.75	0	29.521
evm.model.scaffold_64.18	0.82	2.18	0	26.462
evm.model.scaffold_64.13	1.07	0.86	1.07	35.383
evm.model.scaffold_64.67	1.35	0.48	1.16	10.678
evm.model.scaffold_64.14.2	1.86	0.24	0.9	26.492
evm.model.scaffold_64.21	1.26	1.11	0.63	310.719
evm.model.scaffold_64.3	1.26	0.97	0.77	28.889
evm.model.scaffold_64.75	1.5	0.38	1.13	10.51
evm.model.scaffold_64.37	2.13	0.5	0.38	11.887
evm.model.scaffold_64.6	0.86	1.29	0.86	78.424
evm.model.scaffold_0.16	1.5	1	0.5	177.02
evm.model.scaffold_0.40	1.08	0.42	1.5	11.567
evm.model.scaffold_0.64	1.15	1.15	0.69	124.139
evm.model.scaffold_0.61	1.68	0.36	0.96	15.507
evm.model.scaffold_0.39	3	0	0	18.174
evm.model.scaffold_0.63	1.81	0.5	0.69	15.627
evm.model.scaffold_0.9	2	0	1	11.339
evm.model.scaffold_0.26	1.2	0.77	1.03	11.134
evm.model.scaffold_0.69	0.97	1.46	0.57	11.252
evm.model.scaffold_290.604.1	1.39	0.86	0.75	63.849
evm.model.scaffold_290.20	2	0.75	0.25	129.998
evm.model.scaffold_290.237	2	0.3	0.7	21.634
evm.model.scaffold_290.495	1.09	0.68	1.23	15.943
evm.model.scaffold_290.629	2	0.33	0.67	10.085
evm.model.scaffold_290.511	1.2	0.6	1.2	35.71
evm.model.scaffold_290.342	1.35	1.35	0.3	28.416
evm.model.scaffold_290.599	1.5	1.13	0.38	1203.3
evm.model.scaffold_290.193	2	0.5	0.5	49.799
evm.model.scaffold_290.396	1.8	0.6	0.6	140.704
evm.model.scaffold_290.570	1.27	0.59	1.14	38.74
evm.model.scaffold_290.545	1	1	1	15.415
evm.model.scaffold_290.658	1.37	0.95	0.68	27.822
evm.model.scaffold_290.1	1.24	0.83	0.93	16.581
evm.model.scaffold_290.93	1.38	0.63	1	14.113
evm.model.scaffold_290.309.1	2.33	0	0.67	108.573
evm.model.scaffold_290.432	1.8	0.45	0.75	20.092
evm.model.scaffold_290.592	1.62	0.69	0.69	81.768
evm.model.scaffold_290.692	1.31	1.31	0.38	853.457
evm.model.scaffold_290.454	0.76	1.94	0.29	41.468
evm.model.scaffold_290.395	1.71	0.86	0.43	93.429
evm.model.scaffold_290.213	1.5	0.19	1.31	17.987
evm.model.scaffold_290.350	2.21	0.44	0.35	44.362
evm.model.scaffold_290.461	1.62	0.46	0.92	31.12
evm.model.scaffold_290.708	1.33	1	0.67	132.779
evm.model.scaffold_290.17	1.71	0.43	0.86	10.106
evm.model.scaffold_290.471	1.13	0.75	1.13	28.483
evm.model.scaffold_290.588	1	2	0	17.381
evm.model.scaffold_290.318	1.13	0.87	1	17.903
evm.model.scaffold_290.347	1.62	0.49	0.89	17.055
evm.model.scaffold_290.484	1.07	0.64	1.29	13.843
evm.model.scaffold_290.364.2	1.71	0.64	0.64	218.62
evm.model.scaffold_290.190	1.38	1.15	0.46	178.038
evm.model.scaffold_290.453	1.5	0.92	0.58	51.487
evm.model.scaffold_290.641	1.41	0.35	1.24	38.289
evm.model.scaffold_290.344	0	2.57	0.43	79.582
evm.model.scaffold_290.584	1.4	0.4	1.2	80.291
evm.model.scaffold_290.650	2.14	0	0.86	144.578
evm.model.scaffold_290.447_evm.model.scaffold_290.448	1.34	1.03	0.63	20.26
evm.model.scaffold_290.493	1.23	0.68	1.09	15.751
evm.model.scaffold_290.485	0.88	0.53	1.59	23.577
evm.model.scaffold_290.151.3	1.62	0.69	0.69	17.569
evm.model.scaffold_290.201	1.67	0.67	0.67	44.922
evm.model.scaffold_290.153.3	1.31	0.56	1.13	16.522
evm.model.scaffold_290.646	1.8	0.6	0.6	25.832
evm.model.scaffold_290.91	1.33	1.33	0.33	84.755
evm.model.scaffold_290.125	1.32	1.32	0.36	23.118
evm.model.scaffold_290.5	3	0	0	22.965
evm.model.scaffold_290.31	1.2	0.3	1.5	57.05
evm.model.scaffold_290.303	1.38	1.15	0.46	14.913
evm.model.scaffold_290.605	1.57	0.91	0.52	80.123
evm.model.scaffold_290.690	0.75	1.5	0.75	22.314
evm.model.scaffold_290.361	2.14	0.21	0.64	405.143
evm.model.scaffold_290.704	1.5	1.5	0	431.867
evm.model.scaffold_290.158	1.32	0.79	0.89	30.203
evm.model.scaffold_290.564	1.2	0.6	1.2	26.999
evm.model.scaffold_290.662	1.42	0.63	0.95	17.001
evm.model.scaffold_290.669	2.05	0.55	0.41	292.54
evm.model.scaffold_290.433	1	1	1	35.442
evm.model.scaffold_290.261	1.63	0.43	0.94	10.752
evm.model.scaffold_290.196	1.57	0.43	1	19.951
[truncated: 7,173 more rows]

## Sheet: Val
Gene	GUU	GUC	GUA	GUG	RPKM
evm.model.scaffold_30.17	2.35	0.71	0.71	0.24	32.211
evm.model.scaffold_30.74	1.81	0.52	0.52	1.16	35.828
evm.model.scaffold_30.18	2.13	0.67	0.27	0.93	13.106
evm.model.scaffold_30.35	1.14	0.38	0.95	1.52	19.755
evm.model.scaffold_30.6	1.4	0.5	0.8	1.3	10.274
evm.model.scaffold_30.99.1	1.68	1.05	0.21	1.05	37.53
evm.model.scaffold_30.15	1.2	0.4	0.8	1.6	28.135
evm.model.scaffold_30.57	1.6	1.2	0.8	0.4	23.597
evm.model.scaffold_30.58	1.75	0.5	0.63	1.13	16.215
evm.model.scaffold_30.13	1	0.8	0.6	1.6	27.243
evm.model.scaffold_30.16	0.94	0.24	0.24	2.59	34.685
evm.model.scaffold_30.50	1.33	1.11	0.78	0.78	29.624
evm.model.scaffold_185.490	3.2	0.4	0.4	0	37.337
evm.model.scaffold_185.428	1.25	0.5	1	1.25	10.141
evm.model.scaffold_185.496	1.48	0.67	0.81	1.04	19.285
evm.model.scaffold_185.534	2.06	0.9	0.39	0.65	35.458
evm.model.scaffold_185.340.1	1.2	0.4	1	1.4	75.121
evm.model.scaffold_185.28	1.78	1.33	0.22	0.67	48.94
evm.model.scaffold_185.262	2.35	0.71	0	0.94	17.025
evm.model.scaffold_185.32	0.73	1.45	0.36	1.45	62.511
evm.model.scaffold_185.29	1.75	0.77	0.7	0.77	27.928
evm.model.scaffold_185.117	2	1.25	0.25	0.5	31.362
evm.model.scaffold_185.325	1.33	0.78	1.11	0.78	133.24
evm.model.scaffold_185.376	1.96	0.49	0.41	1.14	16.171
evm.model.scaffold_185.518	1.65	0.63	0.63	1.1	14.597
evm.model.scaffold_185.307	0.67	0.33	2.33	0.67	11.589
evm.model.scaffold_185.82	1.78	0.67	0.22	1.33	50.616
evm.model.scaffold_185.129	1.04	1.48	0	1.48	36.267
evm.model.scaffold_185.34	1.26	0.84	0	1.89	44.369
evm.model.scaffold_185.115	0.92	0.62	0	2.46	11.34
evm.model.scaffold_185.514	1.78	0.74	0.44	1.04	495.985
evm.model.scaffold_185.255	1.71	0.29	0.86	1.14	38.959
evm.model.scaffold_185.384	2	0	0	2	10.698
evm.model.scaffold_185.301	1.78	0	0.89	1.33	32.282
evm.model.scaffold_185.541	1	0.67	0.67	1.67	128.345
evm.model.scaffold_185.48	2.8	0.4	0	0.8	60.84
evm.model.scaffold_185.163	2.47	0.24	0.47	0.82	10.747
evm.model.scaffold_185.35	0.89	1.33	0.44	1.33	431.273
evm.model.scaffold_185.310	1.23	1.23	0.31	1.23	57.041
evm.model.scaffold_185.323	1.94	0.48	0.73	0.85	22.159
evm.model.scaffold_185.293	1.85	0.62	0.38	1.15	65.669
evm.model.scaffold_185.482	1.78	0.22	0	2	65.384
evm.model.scaffold_185.368	1.5	0.75	1	0.75	10.916
evm.model.scaffold_185.407	2.11	0.53	0.45	0.91	36.364
evm.model.scaffold_185.110	1.71	1.43	0.29	0.57	27.522
evm.model.scaffold_185.104	2.11	0.11	0.22	1.56	44.342
evm.model.scaffold_185.59	1.46	0.68	0.68	1.17	21.152
evm.model.scaffold_185.391	2	0	1.09	0.91	57.311
evm.model.scaffold_185.87	2	0.5	0.4	1.1	93.378
evm.model.scaffold_185.268	1.85	0.77	0.77	0.62	93.918
evm.model.scaffold_185.241	1.08	0.77	0.46	1.69	81.741
evm.model.scaffold_185.337_evm.model.scaffold_185.338	1.76	0.8	0.8	0.64	78.859
evm.model.scaffold_185.158	0.8	1.6	0	1.6	13.521
evm.model.scaffold_185.156	2.22	0.89	0.44	0.44	50.563
evm.model.scaffold_185.244	2.06	0.39	0.85	0.7	18.651
evm.model.scaffold_185.308	1.75	0.75	0.25	1.25	16.492
evm.model.scaffold_185.73	1.44	0.78	0.56	1.22	10.218
evm.model.scaffold_185.275	1.33	0.33	1	1.33	68.167
evm.model.scaffold_185.330	1.79	0.43	0.51	1.28	52.762
evm.model.scaffold_185.250	1.79	0.26	0.68	1.28	38.324
evm.model.scaffold_185.61	2	0.5	0.5	1	19.412
evm.model.scaffold_185.317	1.78	0.72	0.56	0.94	24.873
evm.model.scaffold_185.51	0.92	0.62	0.62	1.85	19.698
evm.model.scaffold_185.401	1.96	0.39	0.55	1.1	82.244
evm.model.scaffold_185.114	1.7	0.68	0.51	1.11	35.486
evm.model.scaffold_185.131	1.29	1	0.29	1.43	34.4
evm.model.scaffold_185.26	1.66	1.07	0.2	1.07	17.161
evm.model.scaffold_185.456	2	0.2	1	0.8	30.902
evm.model.scaffold_185.458	2.13	0.63	0.38	0.88	117.16
evm.model.scaffold_185.238	1.31	0.88	0.31	1.5	17.724
evm.model.scaffold_185.15	0.89	1.33	0.67	1.11	110.75
evm.model.scaffold_185.89	2.13	0.27	0.53	1.07	41.466
evm.model.scaffold_185.159	1	1	0.6	1.4	28.399
evm.model.scaffold_185.361	1.71	0.57	0.46	1.26	20.468
evm.model.scaffold_185.313	1.5	0.5	0.5	1.5	26.906
evm.model.scaffold_185.491	1.25	0.5	0.25	2	30.355
evm.model.scaffold_185.277	1.91	0.43	0.61	1.04	13.972
evm.model.scaffold_185.504	2.3	0.97	0.12	0.61	59.692
evm.model.scaffold_185.96	2.5	0	0	1.5	15.33
evm.model.scaffold_185.388	2.29	0.34	0.69	0.69	16.82
evm.model.scaffold_185.78	1	1.5	0	1.5	23.8
evm.model.scaffold_185.322	1.67	0.33	0.67	1.33	14.275
evm.model.scaffold_185.157	0.89	0.44	0.44	2.22	21.946
evm.model.scaffold_185.79	1.47	1.2	0	1.33	19.693
evm.model.scaffold_185.94	1.25	0.75	0.5	1.5	12.13
evm.model.scaffold_185.121	1.78	0.3	0.44	1.48	12.528
evm.model.scaffold_185.134	1.33	2	0	0.67	42.261
evm.model.scaffold_185.66_evm.model.scaffold_185.67	1.91	0.17	0.7	1.22	30.448
evm.model.scaffold_185.374	0.67	0.67	1.33	1.33	16.648
evm.model.scaffold_185.77	1.33	0	1.71	0.95	16.909
evm.model.scaffold_185.372	1.6	0.8	0	1.6	29.733
evm.model.scaffold_185.102	1.5	0.75	0.75	1	52.456
evm.model.scaffold_185.50	1.91	0.52	0.52	1.04	114.399
evm.model.scaffold_185.154	1.85	0.31	0.62	1.23	15.296
evm.model.scaffold_185.133	1.33	0.92	0.51	1.23	362.883
evm.model.scaffold_185.197	1.57	1.14	0.71	0.57	14.208
evm.model.scaffold_185.109	1.75	0.5	0.75	1	46.076
evm.model.scaffold_185.72	1.21	0.74	0.56	1.49	21.725
evm.model.scaffold_185.379	0.89	1.11	0.89	1.11	53.558
evm.model.scaffold_185.360	1.5	0.5	0.17	1.83	40.964
evm.model.scaffold_185.57	1.44	0.8	0.16	1.6	10.458
evm.model.scaffold_185.230	1.6	1.2	0	1.2	17.862
evm.model.scaffold_185.167	1.6	0.4	0.64	1.36	41.775
evm.model.scaffold_185.44	2.37	0.44	0.3	0.89	28.945
evm.model.scaffold_185.472	1.56	0.44	0.67	1.33	130.61
evm.model.scaffold_185.137	2	0.67	1.33	0	27.247
evm.model.scaffold_185.383	3	0.5	0	0.5	12.881
evm.model.scaffold_185.461	1.33	0.89	0.89	0.89	15.547
evm.model.scaffold_185.291	1.33	0.89	0.44	1.33	98.265
evm.model.scaffold_185.261	1.38	0.41	0.69	1.52	76.685
evm.model.scaffold_185.75	0.98	0.68	0.39	1.95	38.169
evm.model.scaffold_185.506	1.67	1	0	1.33	10.626
evm.model.scaffold_185.248	2.25	0.5	0.25	1	123.572
evm.model.scaffold_185.433	1.57	0.85	0.59	0.98	12.345
evm.model.scaffold_185.118	2.09	0.35	0.43	1.13	41.36
evm.model.scaffold_185.112	1.71	0	0.57	1.71	21.386
evm.model.scaffold_185.60	1.23	1.23	0.62	0.92	30.637
evm.model.scaffold_185.520	1.67	0	0.67	1.67	17.605
evm.model.scaffold_185.263	1.33	0.89	0	1.78	14.407
evm.model.scaffold_185.231	1.2	0.8	0.4	1.6	32.412
evm.model.scaffold_185.292	2.09	0.52	0.17	1.22	30.229
evm.model.scaffold_185.334	0.94	1.41	0.24	1.41	17.328
evm.model.scaffold_185.127	1.12	1.12	0.28	1.47	21.01
evm.model.scaffold_185.199	1.44	0.96	1.12	0.48	16.383
evm.model.scaffold_185.53	1.7	0.65	0.61	1.04	49.308
evm.model.scaffold_185.276	1.57	1.29	0.43	0.71	21.515
evm.model.scaffold_185.408	1.68	0.74	0.42	1.16	109.001
evm.model.scaffold_185.41	1.7	0.5	0.5	1.3	10.716
evm.model.scaffold_185.395	1.22	0.7	0.7	1.39	39.591
evm.model.scaffold_185.287	1.5	0.4	0.7	1.4	10.094
evm.model.scaffold_185.356	1.87	0.65	0.34	1.14	10.626
evm.model.scaffold_185.253	2	1	0.5	0.5	40.422
evm.model.scaffold_185.470	0.75	1.88	0	1.38	65.437
evm.model.scaffold_185.435	1.33	0.53	0.67	1.47	76.754
evm.model.scaffold_185.380	1.4	1.21	0.09	1.3	262.018
evm.model.scaffold_185.168	1.14	2.57	0	0.29	40.086
evm.model.scaffold_185.321	1.86	0.14	0.71	1.29	214.92
evm.model.scaffold_185.52	0.67	2.67	0	0.67	70.747
evm.model.scaffold_185.161	1.55	0.91	0.45	1.09	33.886
evm.model.scaffold_185.309	2	0.4	0.4	1.2	35.62
evm.model.scaffold_185.389	1.87	1.33	0	0.8	10.81
evm.model.scaffold_185.519	1.86	1	0.29	0.86	60.458
evm.model.scaffold_185.455	0.5	1.5	0	2	82.304
evm.model.scaffold_185.311	2.22	0.44	0.44	0.89	116.561
evm.model.scaffold_185.91	0.76	1.14	0.19	1.9	59.749
evm.model.scaffold_185.402	0	0	2	2	10.325
evm.model.scaffold_185.49	1.73	0.64	0.54	1.09	50.404
evm.model.scaffold_185.62	1.8	0.6	0	1.6	20.32
evm.model.scaffold_185.359	0.44	1.56	0.22	1.78	29.785
evm.model.scaffold_185.316	1.33	0.95	0.57	1.14	62.151
evm.model.scaffold_185.545	1.68	0.63	0.63	1.05	27.137
evm.model.scaffold_185.175	1.63	0.63	0.5	1.25	14.295
evm.model.scaffold_185.103	2.09	0.7	0.35	0.87	34.875
evm.model.scaffold_185.362.1	2.18	0.73	0.36	0.73	38.966
evm.model.scaffold_185.303	1.64	0.91	0.73	0.73	47.006
evm.model.scaffold_185.457	1.52	0.95	0.57	0.95	48.843
evm.model.scaffold_185.355	2	1	0.4	0.6	13.248
evm.model.scaffold_185.370	1	1.33	0.33	1.33	302.801
evm.model.scaffold_185.56	1.65	0.76	0.47	1.12	58.435
evm.model.scaffold_185.278	1.82	0.48	0.36	1.33	90.085
evm.model.scaffold_35.30	1.63	0.5	0.5	1.38	10.47
evm.model.scaffold_35.873	1.71	0.57	0.29	1.43	20.48
evm.model.scaffold_35.1151	0.62	0.92	0.62	1.85	23.605
evm.model.scaffold_35.449	2.26	0.72	0.51	0.51	13.498
evm.model.scaffold_35.1079	1.58	0.25	1.17	1	14.244
evm.model.scaffold_35.1185	2.21	0.28	0.97	0.55	12.407
evm.model.scaffold_35.369	1.43	1	0.71	0.86	12.687
evm.model.scaffold_35.957	2	1.33	0	0.67	10.653
evm.model.scaffold_35.177	2.18	0.73	0.73	0.36	16.177
evm.model.scaffold_35.834	2.19	0.26	0.13	1.42	54.159
evm.model.scaffold_35.1136	0.97	1.82	0.12	1.09	10.718
evm.model.scaffold_35.958	1.26	0.57	0.69	1.49	26.727
evm.model.scaffold_35.113	1.48	0.59	1.04	0.89	11.626
evm.model.scaffold_35.383	1.63	0.44	0.74	1.19	10.285
evm.model.scaffold_35.1090	0.8	0.8	0.4	2	15.366
evm.model.scaffold_35.659	1.33	1.33	0	1.33	29.991
evm.model.scaffold_35.522	1.14	0.86	0.86	1.14	57.863
evm.model.scaffold_35.477	1.46	0.39	0.88	1.27	13.252
evm.model.scaffold_35.404	2.18	0	0.36	1.45	65.319
evm.model.scaffold_35.933	0.13	1.07	0.53	2.27	57.932
evm.model.scaffold_35.168	1.62	0.65	0.43	1.3	29.41
evm.model.scaffold_35.227	1.33	2	0	0.67	59.361
evm.model.scaffold_35.507	0.84	0.63	0.84	1.68	12.967
evm.model.scaffold_35.907	1.8	0.67	0.33	1.2	21.188
evm.model.scaffold_35.338	1.33	0.44	1.11	1.11	13.344
evm.model.scaffold_35.105	2.44	0.67	0.67	0.22	30.426
evm.model.scaffold_35.1046	2	0.33	1.33	0.33	26.158
evm.model.scaffold_35.542	2	0.2	0.4	1.4	11.244
evm.model.scaffold_35.1001	1.69	0.92	0.77	0.62	10.697
evm.model.scaffold_35.974	2	1	0	1	95.771
evm.model.scaffold_35.197	1.86	0.77	0.38	0.99	222.244
evm.model.scaffold_35.239	1.87	0.6	0.6	0.94	21.896
evm.model.scaffold_35.172	0.5	1.5	0.5	1.5	19.062
evm.model.scaffold_35.305	1.93	0.73	0.47	0.87	20.07
evm.model.scaffold_35.478	1.79	0.53	0.74	0.95	13.988
evm.model.scaffold_35.820	1	2.2	0	0.8	39.067
evm.model.scaffold_35.1014	1	0.67	0.67	1.67	10.294
evm.model.scaffold_35.188	2	0.67	0.22	1.11	65.118
evm.model.scaffold_35.586	1.6	0.8	0.8	0.8	137.131
evm.model.scaffold_35.747	1.6	0.46	0.91	1.03	15.079
evm.model.scaffold_35.510	1.73	0.6	0.6	1.07	28.678
evm.model.scaffold_35.100	1.41	0.71	0.94	0.94	26.402
evm.model.scaffold_35.578	2.4	0	0.4	1.2	29.507
evm.model.scaffold_35.234	2.34	0.2	0.59	0.88	16.626
evm.model.scaffold_35.559	1.78	0.44	0.44	1.33	10.713
evm.model.scaffold_35.641	2.26	0.17	0.35	1.22	10.418
evm.model.scaffold_35.1028	0	4	0	0	45.839
evm.model.scaffold_35.670	1.42	0.39	0.13	2.06	106.343
evm.model.scaffold_35.420	1.67	0.17	1	1.17	10.908
evm.model.scaffold_35.902	0.88	1.25	0.5	1.38	18.403
evm.model.scaffold_35.407	0.89	0.89	0.89	1.33	34.471
evm.model.scaffold_35.620	1.45	0	1.45	1.09	20.129
evm.model.scaffold_35.1058	1.33	0.83	0.67	1.17	10.519
evm.model.scaffold_35.679	2.24	0.48	0.64	0.64	33.799
evm.model.scaffold_35.626	2	0.59	0.35	1.06	36.812
evm.model.scaffold_35.694.1	1.33	0.76	0.76	1.14	449.439
evm.model.scaffold_35.784_evm.model.scaffold_35.785	1.13	0.82	1.13	0.92	54.746
evm.model.scaffold_35.286	2	0.38	0.31	1.31	26.552
evm.model.scaffold_35.421	2.53	0	0.21	1.26	28.23
evm.model.scaffold_35.236	0.8	1.6	0.8	0.8	22.975
evm.model.scaffold_35.757	1.79	0.55	0.55	1.1	39.103
evm.model.scaffold_35.752	1.6	0.5	0.5	1.4	15.556
evm.model.scaffold_35.663	1.67	0	0.67	1.67	21.519
evm.model.scaffold_35.397	1	1.5	1	0.5	41.25
evm.model.scaffold_35.564	1.78	0.44	0.44	1.33	60.403
evm.model.scaffold_35.245	1.76	0.64	0.96	0.64	19.281
evm.model.scaffold_35.1022.2	1.73	0.65	0.76	0.86	11.43
evm.model.scaffold_35.618	1.33	1.11	0.44	1.11	27.205
evm.model.scaffold_35.575	1.47	0.63	0.21	1.68	103.766
evm.model.scaffold_35.909.2	2.31	0.31	0.77	0.62	37.948
evm.model.scaffold_35.743	1.65	0.35	1.06	0.94	20.37
evm.model.scaffold_35.1019	0.57	1.14	0	2.29	10.482
evm.model.scaffold_35.321	1.69	0.62	0.31	1.38	11.144
evm.model.scaffold_35.881	1.23	1.23	0	1.54	15.795
evm.model.scaffold_35.269	1.68	0	0.9	1.42	30.54
evm.model.scaffold_35.592	1.73	0.41	0.82	1.05	13.789
evm.model.scaffold_35.499	1.14	1.14	0	1.71	130.235
evm.model.scaffold_35.711	1.45	1.45	0	1.09	28.235
evm.model.scaffold_35.1072	1.5	0.75	1	0.75	26.84
evm.model.scaffold_35.466	1.9	0.6	0.5	1	10.31
evm.model.scaffold_35.498	1.71	0	0.57	1.71	12.19
evm.model.scaffold_35.668	0.4	2.8	0	0.8	19.024
evm.model.scaffold_35.729	2.95	0	0.21	0.84	12.627
evm.model.scaffold_35.894	1.43	1.14	0.29	1.14	39.09
evm.model.scaffold_35.751	1.55	0.55	0.82	1.09	13.856
evm.model.scaffold_35.792	2.32	0.32	0.54	0.81	11.286
evm.model.scaffold_35.520	1.26	0.63	0.84	1.26	23.663
evm.model.scaffold_35.328	1.41	0.94	0.47	1.18	32.118
evm.model.scaffold_35.758	1.67	1	0.33	1	15.173
evm.model.scaffold_35.536	2	0.25	0.5	1.25	20.052
evm.model.scaffold_35.547	1.69	0.62	0.09	1.6	29.957
evm.model.scaffold_35.823	2.3	0.4	0.2	1.1	27.735
evm.model.scaffold_35.744	1.71	0.14	1.14	1	28.784
evm.model.scaffold_35.252	1.74	0.7	0.87	0.7	21.398
evm.model.scaffold_35.419	1.52	0.57	0	1.9	58.566
evm.model.scaffold_35.231	1.43	1.43	0.14	1	11.08
evm.model.scaffold_35.633	1.14	1.71	0	1.14	198.451
evm.model.scaffold_35.765	2.11	0.63	0.63	0.63	55.159
evm.model.scaffold_35.39	1.14	1.03	0.46	1.37	12.673
evm.model.scaffold_35.150	1.33	1.33	0.44	0.89	52.101
evm.model.scaffold_35.88	1.08	0.76	0.76	1.41	11.861
evm.model.scaffold_35.311	1.62	0.51	0.94	0.94	26.493
evm.model.scaffold_35.372	0.91	0.73	0.91	1.45	22.755
evm.model.scaffold_35.67	0.8	1.2	1.2	0.8	43.82
evm.model.scaffold_35.87	1.8	1	0.2	1	21.89
evm.model.scaffold_35.129	1.83	0.58	0.42	1.17	19.585
evm.model.scaffold_35.952	1.71	0.57	0.8	0.91	10.244
evm.model.scaffold_35.335.1	2	0.48	0.67	0.86	14.852
evm.model.scaffold_35.355	3	0	1	0	15.388
evm.model.scaffold_35.198	1.27	1.27	0.91	0.55	96.011
evm.model.scaffold_35.764	1.89	1.05	0.63	0.42	27.787
evm.model.scaffold_35.99	1.9	0.75	0.54	0.81	39.585
evm.model.scaffold_35.135	1.33	2	0	0.67	24.661
evm.model.scaffold_35.793	2	0	2	0	78.262
evm.model.scaffold_35.84	1.93	0.44	0.44	1.19	19.373
evm.model.scaffold_35.833	2.07	0.64	0.57	0.71	24.444
evm.model.scaffold_35.488	1.71	0	0.57	1.71	26.589
evm.model.scaffold_35.414	1.76	0.59	0.59	1.06	25.675
evm.model.scaffold_35.629	1.47	1.16	0.32	1.05	128.702
evm.model.scaffold_35.461	2.22	0.67	0.22	0.89	49.049
evm.model.scaffold_35.1102	1.58	0.61	0.48	1.33	11.514
evm.model.scaffold_35.85	1.04	0.52	1.04	1.39	19.896
evm.model.scaffold_35.1070	2	0.6	0.8	0.6	13.42
evm.model.scaffold_35.924	1.25	0.5	0.5	1.75	32.201
evm.model.scaffold_35.755	0	0	2.29	1.71	20.317
evm.model.scaffold_35.408	1.87	0.27	0	1.87	98.672
evm.model.scaffold_35.181	0.4	1.2	0.8	1.6	151.572
evm.model.scaffold_35.1150	1.44	0.51	0.82	1.23	15.551
evm.model.scaffold_35.3	1.28	0.8	0.8	1.12	110.394
evm.model.scaffold_35.1171	1.24	0.55	0.69	1.52	13.717
evm.model.scaffold_35.971	1.74	0.7	0.52	1.04	37.35
evm.model.scaffold_35.737	2.22	0.89	0.44	0.44	101.386
evm.model.scaffold_35.115	1.59	1.06	0.47	0.88	17.022
evm.model.scaffold_35.8	0.8	0.4	0.8	2	17.901
evm.model.scaffold_35.24	1.5	0.7	0.7	1.1	29.406
evm.model.scaffold_35.801	1.77	0.85	0	1.38	35.834
evm.model.scaffold_35.961	1.21	0.73	0.61	1.45	42.578
evm.model.scaffold_35.762	0.91	0.91	0	2.18	50.784
evm.model.scaffold_35.230	1.77	0.47	0.74	1.02	20.365
evm.model.scaffold_35.1045	2.11	0.84	0.42	0.63	13.349
evm.model.scaffold_35.453	1.88	0.5	0.38	1.25	39.532
evm.model.scaffold_35.409	1.71	0.29	0.29	1.71	21.856
evm.model.scaffold_35.2	1.74	0.62	0.62	1.03	23.1
evm.model.scaffold_35.825	1.95	0.49	0.59	0.98	35.289
evm.model.scaffold_35.395	0.4	1.6	0.8	1.2	139.597
evm.model.scaffold_35.925	2	0.41	0.53	1.06	11.128
evm.model.scaffold_35.81	1.84	0.27	0.81	1.08	11.914
evm.model.scaffold_35.794	2.55	0.36	1.09	0	20.273
evm.model.scaffold_35.572	1.71	1.14	0.57	0.57	28.689
evm.model.scaffold_35.317	1.6	1.07	0.53	0.8	26.793
evm.model.scaffold_35.666	0.51	1.13	0.41	1.95	32.23
evm.model.scaffold_35.722	1.78	0.89	0.44	0.89	11.051
evm.model.scaffold_35.258	1.38	0.63	1	1	11.751
evm.model.scaffold_35.804	2.3	0.4	0.7	0.6	10.971
evm.model.scaffold_35.459	2.29	0	0.57	1.14	940.174
evm.model.scaffold_35.350	1.87	0.71	0.27	1.16	13.767
evm.model.scaffold_35.194	0.89	0.89	1.33	0.89	144.226
evm.model.scaffold_35.750	1.41	0.47	0.71	1.41	69.903
evm.model.scaffold_35.233	1.45	1.09	0.73	0.73	17.424
evm.model.scaffold_35.687	0.98	0.71	0.62	1.69	13.163
evm.model.scaffold_35.742	1.96	0.51	0.17	1.36	16.04
evm.model.scaffold_35.257	1.33	0.44	0	2.22	25.399
evm.model.scaffold_35.90	1.29	1.18	0.24	1.29	11.141
evm.model.scaffold_35.1055	0.44	1.78	0	1.78	11.093
evm.model.scaffold_35.271	1.71	0.71	0.43	1.14	34.085
evm.model.scaffold_35.332	2.13	0.5	0.38	1	21.79
evm.model.scaffold_35.728	1.2	0.4	0.4	2	47.646
evm.model.scaffold_35.625	1.45	0.73	0.55	1.27	32.752
evm.model.scaffold_35.1000	1.22	0.7	0.52	1.57	30.145
evm.model.scaffold_35.658	1.79	0.11	0.53	1.58	48.141
evm.model.scaffold_35.184	2.59	0.22	0.86	0.32	13.676
evm.model.scaffold_35.735	1.54	0.62	0	1.85	13.78
evm.model.scaffold_35.726	1.64	0.36	0.79	1.21	19.984
evm.model.scaffold_35.1083	1.22	1.91	0	0.87	33.221
evm.model.scaffold_35.106	2.8	0	0.4	0.8	23.633
evm.model.scaffold_35.56.2	1.73	0.4	1.07	0.8	74.286
evm.model.scaffold_35.1117	1.52	0.19	0.57	1.71	16.437
evm.model.scaffold_35.1039	2.22	0.33	0.56	0.89	12.692
evm.model.scaffold_35.48	0.95	0.19	0.95	1.9	14.012
evm.model.scaffold_35.441	1.89	0.84	0.84	0.42	11.449
evm.model.scaffold_35.169	1.58	0.85	0.36	1.21	13.794
evm.model.scaffold_35.526	1.4	0.4	1	1.2	19.637
evm.model.scaffold_35.1115	1.87	0.56	0.66	0.92	13.988
evm.model.scaffold_35.201	1.31	0.66	0.52	1.51	26.046
evm.model.scaffold_35.824	2.38	0.54	0.11	0.97	25.178
evm.model.scaffold_35.406	2	0.29	0	1.71	992.1
evm.model.scaffold_35.33	0.62	0.62	1.85	0.92	20.203
evm.model.scaffold_35.218_evm.model.scaffold_35.219	1.62	0.6	0.43	1.36	30.04
evm.model.scaffold_35.644	1.64	0.6	0.44	1.32	11.609
evm.model.scaffold_35.216	0.8	2	0	1.2	81.044
evm.model.scaffold_35.316	1.56	0.78	0	1.67	312.519
evm.model.scaffold_35.485	1.45	0.36	0	2.18	14.325
evm.model.scaffold_35.570.1	2.31	0.62	0.31	0.77	10.318
evm.model.scaffold_35.591	1.5	0.5	1	1	17.699
evm.model.scaffold_35.970	1.78	0	0.44	1.78	18.45
evm.model.scaffold_35.681	2.13	0.44	0.44	0.98	30.303
evm.model.scaffold_35.487	1.82	0.36	1.45	0.36	20.584
evm.model.scaffold_35.127	1.68	0.63	0.42	1.26	65.356
evm.model.scaffold_35.1003	0	0	0	4	14.642
evm.model.scaffold_35.504	1.43	0.38	0	2.19	11.131
evm.model.scaffold_35.790	1.09	1.45	0	1.45	353.399
evm.model.scaffold_35.325	1.79	0.53	0.74	0.95	36.79
evm.model.scaffold_35.589	2.32	0.35	0.63	0.7	10.42
evm.model.scaffold_35.327	2.5	0	0	1.5	42.288
evm.model.scaffold_35.1125	2.15	0.62	0	1.23	48.103
evm.model.scaffold_35.182	1.9	0.57	0.19	1.33	13.078
evm.model.scaffold_35.467	0.83	2.07	0.14	0.97	28.382
evm.model.scaffold_35.678	2	0.67	0	1.33	15.745
evm.model.scaffold_35.807	1.37	0.59	0.88	1.17	24.336
evm.model.scaffold_35.693	1.51	0.53	0.45	1.51	14.772
evm.model.scaffold_35.294	1.58	0.42	0.63	1.37	30.396
evm.model.scaffold_35.275	1.84	0.52	0.65	1	13.121
evm.model.scaffold_35.345	1.05	0.63	0.42	1.89	25.317
evm.model.scaffold_35.738	1.09	0.55	0.73	1.64	20.535
evm.model.scaffold_35.1004	1.69	0.15	1.08	1.08	42.085
evm.model.scaffold_35.313	3.2	0	0	0.8	22.351
evm.model.scaffold_35.1170	1.33	1.33	0.33	1	3789.21
evm.model.scaffold_35.333.1	1.58	0.48	0.61	1.33	12.394
evm.model.scaffold_35.208	1.25	0.75	0.42	1.58	20.546
evm.model.scaffold_35.199	1.11	0.44	0.44	2	15.019
evm.model.scaffold_35.246	1.47	1.26	0.21	1.05	10.598
evm.model.scaffold_35.1159	2.07	0.83	0.14	0.97	61.18
evm.model.scaffold_35.207	1.45	2.18	0	0.36	15.054
evm.model.scaffold_35.405	2	0.8	0.2	1	24.1
evm.model.scaffold_35.125	2.67	0.67	0.67	0	70.93
evm.model.scaffold_35.791	1	1	1	1	700.848
evm.model.scaffold_35.228	1.43	0.57	0.71	1.29	112.026
evm.model.scaffold_35.425	1.78	0.89	0.89	0.44	48.049
evm.model.scaffold_35.91	0.9	1.29	0.39	1.42	50.486
evm.model.scaffold_35.174	1.37	0.69	0.11	1.83	80.143
evm.model.scaffold_35.519	1.14	1.14	0.29	1.43	15.507
evm.model.scaffold_35.746	0.96	0.96	0.8	1.28	10.353
evm.model.scaffold_35.563	1.5	0	0.25	2.25	19.394
evm.model.scaffold_35.356	1.33	0.38	1.14	1.14	14.122
evm.model.scaffold_35.966	1.88	0.38	0.38	1.38	10.274
evm.model.scaffold_35.75.1	0	0	2	2	426.244
evm.model.scaffold_35.426	1.87	0.27	0	1.87	29.212
evm.model.scaffold_35.238	1.84	0.48	0.72	0.96	40.175
evm.model.scaffold_35.200	1.52	0.55	0.83	1.1	32.317
evm.model.scaffold_35.173	0.73	0.73	0.36	2.18	21.492
evm.model.scaffold_35.810	0.94	0.77	0.77	1.53	11.94
evm.model.scaffold_35.14	1.87	0.53	0.27	1.33	15.391
evm.model.scaffold_35.685_evm.model.scaffold_35.686	0.88	0.72	0.64	1.76	38.301
evm.model.scaffold_35.866	1.33	0.56	0.67	1.44	49.295
evm.model.scaffold_35.178	2	0.27	0.4	1.33	15.206
evm.model.scaffold_35.223	1.77	0.38	0.69	1.15	17.391
evm.model.scaffold_35.1017	1.33	0.74	0.15	1.78	15.147
evm.model.scaffold_35.375	1.33	1.33	0.44	0.89	15.822
evm.model.scaffold_35.7	1.53	0.53	0.68	1.26	14.251
evm.model.scaffold_35.1140	1.71	0.69	0.91	0.69	24.006
evm.model.scaffold_35.1080	1.33	1.07	0.53	1.07	20.52
evm.model.scaffold_35.1086	1.33	1.33	0.89	0.44	20.631
evm.model.scaffold_35.77	1.54	0.62	0.77	1.08	13.866
evm.model.scaffold_35.220	2.21	0.55	0.41	0.83	31.783
evm.model.scaffold_35.1002	1.9	0.76	0.38	0.95	14.561
evm.model.scaffold_35.1099	1.53	1.29	0.35	0.82	17.096
evm.model.scaffold_99.54	1.14	1.14	0.86	0.86	73.997
evm.model.scaffold_99.58	1.94	0.74	0.51	0.8	10.568
evm.model.scaffold_99.21	1.83	0.75	0.5	0.92	16.161
evm.model.scaffold_99.65	1.88	1.18	0.24	0.71	25.399
evm.model.scaffold_99.9	1.67	1	0	1.33	621.767
evm.model.scaffold_99.8	1.39	0.96	0.78	0.87	19.578
evm.model.scaffold_99.57	1	1.75	0	1.25	97.068
evm.model.scaffold_99.79	1.7	0.97	0.12	1.21	20.934
evm.model.scaffold_99.37	0.11	1.94	0.23	1.71	44.432
evm.model.scaffold_99.55	1.43	0.86	0.57	1.14	35.357
evm.model.scaffold_99.51	1.04	0.52	0.7	1.74	349.362
evm.model.scaffold_99.28	1.76	0.16	0.64	1.44	42.183
evm.model.scaffold_99.56	1.17	1.17	0.67	1	60.022
evm.model.scaffold_99.75	2.05	0.78	0.39	0.78	26.374
evm.model.scaffold_99.31	1.33	0	0.67	2	83.172
evm.model.scaffold_99.36	0.77	1.08	0.15	2	32.282
evm.model.scaffold_99.29	0	2	0.67	1.33	23.945
evm.model.scaffold_99.78	1	0.5	1	1.5	41.444
evm.model.scaffold_99.30	1.6	0.4	0.8	1.2	57.475
evm.model.scaffold_99.10	1.33	0.67	0.33	1.67	19.497
evm.model.scaffold_99.73	1.59	0.57	0.38	1.46	27.479
evm.model.scaffold_99.67	0	0.67	0	3.33	773.174
evm.model.scaffold_99.60	0.89	1.11	0.89	1.11	10.398
evm.model.scaffold_99.34	1.18	0.47	1.18	1.18	18.124
evm.model.scaffold_99.22	2.45	0.52	0.39	0.65	10.955
evm.model.scaffold_311.9	0.76	1.33	0.38	1.52	19.312
evm.model.scaffold_311.4	1.93	0.14	0.97	0.97	13.153
evm.model.scaffold_311.5	1.76	0.2	0.78	1.27	12.807
evm.model.scaffold_334.7	1.09	1.09	0	1.82	60.994
evm.model.scaffold_375.676	1.65	0.71	0.47	1.18	10.085
evm.model.scaffold_375.111	0.71	1.18	0.47	1.65	325.665
evm.model.scaffold_375.101_evm.model.scaffold_375.102	1.65	0.59	0.59	1.18	18.39
evm.model.scaffold_375.107	1.71	0.57	0.57	1.14	36.181
evm.model.scaffold_375.759	1.6	0.53	0.8	1.07	22.418
evm.model.scaffold_375.113	1	1	0.5	1.5	22.937
evm.model.scaffold_375.171	2	0	0	2	40.026
evm.model.scaffold_375.122	1	1.14	1	0.86	32.527
evm.model.scaffold_375.779	2.11	0.42	0.63	0.84	10.642
evm.model.scaffold_375.360	1.28	0.77	0.17	1.79	20.668
evm.model.scaffold_375.679	1.74	1.03	0.41	0.82	12.236
evm.model.scaffold_375.32	1.71	0.43	0.71	1.14	14.443
evm.model.scaffold_375.731	2.33	0.33	0	1.33	16.074
evm.model.scaffold_375.64.2	1.71	0.57	0	1.71	35.114
evm.model.scaffold_375.575	2.22	0.44	0	1.33	25.937
evm.model.scaffold_375.417	1.64	1.27	0.36	0.73	31.738
evm.model.scaffold_375.774	1.65	0.71	0	1.65	16.063
evm.model.scaffold_375.536	1.54	0.31	0.31	1.85	54.5
evm.model.scaffold_375.364	1.23	1.23	0	1.54	22.707
evm.model.scaffold_375.714	1.07	0.8	0.53	1.6	591.418
evm.model.scaffold_375.40	1.6	1.6	0	0.8	29.023
evm.model.scaffold_375.229	1.67	0.5	0.5	1.33	15.239
evm.model.scaffold_375.314	0.8	0.64	1.76	0.8	10.1
evm.model.scaffold_375.290	1.23	1.38	0.62	0.77	16.758
evm.model.scaffold_375.215	0.57	1.14	0	2.29	17.304
evm.model.scaffold_375.527.1	2.12	0.94	0.47	0.47	20.651
evm.model.scaffold_375.233	2	0.26	0.7	1.04	28.337
evm.model.scaffold_375.168	1.82	0.66	0.66	0.86	26.953
evm.model.scaffold_375.207	1	1	0.4	1.6	42.513
evm.model.scaffold_375.155	1.52	0.48	0.83	1.17	12.115
evm.model.scaffold_375.240	1.09	1.82	0.36	0.73	30.684
evm.model.scaffold_375.603	0.63	1.05	0.84	1.47	41.854
evm.model.scaffold_375.65	1.48	0.26	0.96	1.3	12.927
evm.model.scaffold_375.499	1.26	1.26	0.21	1.26	94.088
evm.model.scaffold_375.217	1.6	1.33	0.27	0.8	30.632
evm.model.scaffold_375.656	1.13	0.75	0.13	2	143.972
evm.model.scaffold_375.124	1.33	1.52	0.19	0.95	76.636
evm.model.scaffold_375.202	2.46	0.62	0.46	0.46	15.195
evm.model.scaffold_375.237	2	0.43	0.52	1.04	50.734
evm.model.scaffold_375.46	1.71	0.57	1.14	0.57	53.708
evm.model.scaffold_375.58	2.06	0.36	0.85	0.73	22.294
evm.model.scaffold_375.114	0.29	1.43	0.29	2	59.904
evm.model.scaffold_375.681	1.71	1.14	0.57	0.57	10.647
evm.model.scaffold_375.56	1.89	0.63	0.32	1.16	52.64
evm.model.scaffold_375.444	1.69	0.45	0.34	1.52	29.344
evm.model.scaffold_375.607.3	1.55	0.41	0.82	1.22	87.285
evm.model.scaffold_375.562	1.63	0.74	0.3	1.33	35.469
evm.model.scaffold_375.205	1.56	0.67	0.74	1.04	17.949
evm.model.scaffold_375.528	1.38	0.85	0.79	0.98	10.177
evm.model.scaffold_375.739	1.14	0.57	1.14	1.14	13.589
evm.model.scaffold_375.517	0.86	0.86	0.29	2	527.664
evm.model.scaffold_375.773	2.04	0.59	0.59	0.78	22.547
evm.model.scaffold_375.516	1.4	0.84	0.77	0.98	14.373
evm.model.scaffold_375.123	1.6	1.4	0.2	0.8	33.214
evm.model.scaffold_375.188	1.43	0.95	0.76	0.86	11.63
evm.model.scaffold_375.197	0.7	1.22	0.52	1.57	378.507
evm.model.scaffold_375.399	1.6	0.8	0	1.6	34.204
evm.model.scaffold_375.143.1	1.5	0.5	0.75	1.25	11.839
evm.model.scaffold_375.289	1	1.25	0.75	1	34.464
evm.model.scaffold_375.510	0	0.67	0	3.33	12.216
evm.model.scaffold_375.119	1.71	0.82	0.76	0.71	35.199
evm.model.scaffold_375.212	1.57	0.71	0.86	0.86	22.583
evm.model.scaffold_375.619	1.54	0.62	0.31	1.54	13.735
evm.model.scaffold_375.291	1.22	0.87	0.17	1.74	22.954
evm.model.scaffold_375.16	1.85	1.23	0.31	0.62	14.934
evm.model.scaffold_375.116	0.47	1.41	0	2.12	25.254
evm.model.scaffold_375.487	1.26	0.63	0.42	1.68	95.283
evm.model.scaffold_375.688	1	2	0	1	11.346
evm.model.scaffold_375.261.1	2.4	0.64	0.8	0.16	85.821
evm.model.scaffold_375.320	1.85	0.44	0.59	1.11	12.663
evm.model.scaffold_375.279	1.71	0.38	0.95	0.95	11.283
evm.model.scaffold_375.191	2.14	1	0.14	0.71	33.878
evm.model.scaffold_375.687	1.85	0.62	0.31	1.23	10.564
evm.model.scaffold_375.395	1.65	1.41	0	0.94	16.028
evm.model.scaffold_375.117	1.83	0.26	0.7	1.22	32.105
evm.model.scaffold_375.469	2.29	0.29	0.86	0.57	19.71
evm.model.scaffold_375.166	1.33	0.27	0.53	1.87	66.397
evm.model.scaffold_375.47.5	1.14	1.03	0.34	1.49	15.892
evm.model.scaffold_375.506	2.4	0	0.8	0.8	12.621
evm.model.scaffold_375.573	1.6	0.8	0.27	1.33	27.341
evm.model.scaffold_375.747	1.48	1.19	0.15	1.19	37.714
evm.model.scaffold_375.534	1.67	0.33	0.67	1.33	33.604
evm.model.scaffold_375.60	1.69	0.62	0.62	1.08	35.152
evm.model.scaffold_375.634	2.5	0.5	0.5	0.5	13.015
evm.model.scaffold_375.470	2	0.67	0.67	0.67	47.779
evm.model.scaffold_375.467	2.12	0.47	0.35	1.06	18.225
evm.model.scaffold_375.472	0.69	0.8	0.23	2.29	108.744
evm.model.scaffold_375.363	1.75	1.25	0	1	190.352
evm.model.scaffold_375.160	0.47	0.71	0.47	2.35	15.892
evm.model.scaffold_375.99	1.82	0.82	0.91	0.45	18.603
evm.model.scaffold_375.689	1.33	0	1.87	0.8	13.285
evm.model.scaffold_375.468	1.78	0.44	0.67	1.11	14.446
evm.model.scaffold_375.6	2.57	0.57	0	0.86	14.989
evm.model.scaffold_375.125	1.09	1.09	0.36	1.45	10.791
evm.model.scaffold_375.309	2.4	0.8	0.8	0	29.718
evm.model.scaffold_375.332	1.67	0	1	1.33	32.668
evm.model.scaffold_375.288	2.22	0.44	0.89	0.44	95.813
evm.model.scaffold_375.398	1.6	0.65	0.73	1.02	14.925
evm.model.scaffold_375.513	2	1.5	0.25	0.25	114.607
evm.model.scaffold_375.746	2	0.67	0	1.33	10.148
evm.model.scaffold_375.525	1.91	0.52	0.17	1.39	27.715
evm.model.scaffold_375.540	1.33	0.89	0.89	0.89	10.84
evm.model.scaffold_375.130	0.57	1.14	0.57	1.71	11.49
evm.model.scaffold_375.721	2.08	0.48	0.32	1.12	409.108
evm.model.scaffold_375.387.1	1.33	0.89	0.67	1.11	41.133
evm.model.scaffold_375.73	1.71	0	0	2.29	37.06
evm.model.scaffold_375.165	2.13	0.62	0.44	0.8	10.156
evm.model.scaffold_375.219	2.48	0.38	0.19	0.95	11.261
evm.model.scaffold_375.142	1.71	0.57	0.57	1.14	15.741
evm.model.scaffold_375.539	1.87	0.53	0.53	1.07	52.194
evm.model.scaffold_375.34	1.6	0.69	0.75	0.96	27.544
evm.model.scaffold_375.449	0.92	1.54	0	1.54	136.32
evm.model.scaffold_375.738	1.49	1.37	0.34	0.8	11.113
evm.model.scaffold_375.466	1.86	0.37	0.56	1.21	17.981
evm.model.scaffold_375.258	1.22	0.87	0.87	1.04	22.601
evm.model.scaffold_375.726	1.52	0	0.57	1.9	22.174
evm.model.scaffold_375.586	2.47	0.47	0.47	0.59	87.378
evm.model.scaffold_375.190	1.2	1.4	0.2	1.2	100.117
evm.model.scaffold_375.157	0	0.8	0.8	2.4	20.918
evm.model.scaffold_375.27	1.75	0.5	0.25	1.5	73.091
evm.model.scaffold_375.445	1.64	1.09	0.36	0.91	22.479
evm.model.scaffold_375.154	1.95	0.88	0.29	0.88	23.876
evm.model.scaffold_375.294	1.12	1.12	0.19	1.58	100.794
evm.model.scaffold_375.412_evm.model.scaffold_375.414	1.67	0.83	0.33	1.17	17.882
evm.model.scaffold_375.213	1.5	0.5	0.75	1.25	14.386
evm.model.scaffold_375.431	0	0.8	0.8	2.4	65.631
evm.model.scaffold_375.587	1.37	0.42	0.78	1.43	22
evm.model.scaffold_375.663	3	0.5	0	0.5	231.61
evm.model.scaffold_375.658	1.65	0.63	0.55	1.18	18.994
evm.model.scaffold_375.223	1.52	1.71	0.57	0.19	20.807
evm.model.scaffold_375.713	1.6	0.4	1.2	0.8	14.403
evm.model.scaffold_375.662	2.03	0.39	0.33	1.25	14.081
evm.model.scaffold_375.434	2.1	0.57	0.38	0.95	88.04
evm.model.scaffold_375.74.1	1.29	0.86	0.57	1.29	45.799
evm.model.scaffold_375.566	1.67	0.84	0.74	0.74	42.202
evm.model.scaffold_375.151	2.67	0.53	0.27	0.53	13.153
evm.model.scaffold_375.450	1.18	0.24	0.47	2.12	717.654
evm.model.scaffold_375.505	2.29	0.57	0	1.14	11.378
evm.model.scaffold_375.761	0.05	0	0	3.95	1165.56
evm.model.scaffold_375.519	1.39	1.22	0.35	1.04	88.832
evm.model.scaffold_375.426	2.35	0.24	0.71	0.71	16.636
evm.model.scaffold_375.362	2	0.57	1.14	0.29	204.764
evm.model.scaffold_375.730	2.4	0	0	1.6	32.387
evm.model.scaffold_375.707	1.09	1.45	0	1.45	36.461
evm.model.scaffold_375.531.1	1.48	0.59	0.74	1.19	288.149
evm.model.scaffold_375.322	1.74	0.92	0.21	1.13	68.447
evm.model.scaffold_375.43	2	0.75	0.38	0.88	111.748
evm.model.scaffold_375.264	0.71	1.41	0	1.88	40.149
evm.model.scaffold_375.654	1.09	2.18	0.36	0.36	10.984
evm.model.scaffold_375.305	0	0	2.86	1.14	171.107
evm.model.scaffold_375.598	1.38	0.75	0.75	1.13	10.444
evm.model.scaffold_375.593	2.33	0.33	0.33	1	25.96
evm.model.scaffold_375.62	1.6	0.8	0.4	1.2	76.753
evm.model.scaffold_375.256	0	1.33	1.33	1.33	11.784
evm.model.scaffold_375.203	1.64	0.29	0.5	1.57	38
evm.model.scaffold_375.685	1.23	0.62	0	2.15	10.034
evm.model.scaffold_375.199	1.78	0.44	0	1.78	288.562
evm.model.scaffold_375.700	1.19	0.74	0.44	1.63	38.446
evm.model.scaffold_375.661	1.09	0.73	1.09	1.09	32.616
evm.model.scaffold_375.36	2.4	0.8	0.8	0	35.996
evm.model.scaffold_375.617	1.14	0.57	0.38	1.9	46.999
evm.model.scaffold_375.743	1.93	0.52	0.67	0.89	24.865
evm.model.scaffold_375.677	1.6	0.8	0.2	1.4	23.244
evm.model.scaffold_375.596	1.92	0.32	0.8	0.96	22.134
evm.model.scaffold_375.230	2.19	1.05	0.38	0.38	43.137
evm.model.scaffold_375.353	1.67	1.33	0.5	0.5	27.612
evm.model.scaffold_375.605	1.57	0.86	0.43	1.14	114.563
evm.model.scaffold_375.418	2.15	0.62	0.31	0.92	10.107
evm.model.scaffold_375.589	1.33	0.67	0	2	395.193
evm.model.scaffold_375.682	1.45	0.45	0.64	1.45	28.694
evm.model.scaffold_375.750	1.71	0.64	0.43	1.21	63.288
evm.model.scaffold_375.635	0.92	0.31	0.92	1.85	18.744
evm.model.scaffold_375.321	2.06	0.26	0.13	1.55	21.29
evm.model.scaffold_375.271	1.45	0.36	0.48	1.7	45.442
evm.model.scaffold_375.167	1	0.5	1	1.5	35.908
evm.model.scaffold_375.421	1.66	0.2	0.49	1.66	19.789
evm.model.scaffold_375.136	2	0.4	0	1.6	18.116
evm.model.scaffold_375.235	2	0	1.2	0.8	11.88
evm.model.scaffold_375.109	2	0.33	0.33	1.33	26.268
evm.model.scaffold_375.140	0.94	1.65	0.71	0.71	10.387
evm.model.scaffold_375.218	1.68	0.43	0.86	1.03	36.619
evm.model.scaffold_375.163	1.62	0.54	0.54	1.3	28.784
evm.model.scaffold_375.481	2.13	0.77	0.68	0.43	13.002
evm.model.scaffold_375.352	1.67	0.67	0.67	1	37.638
evm.model.scaffold_375.391	1.04	1.33	0	1.63	37.028
evm.model.scaffold_375.601	0	0.67	0.67	2.67	85.327
evm.model.scaffold_375.735	1.33	0.83	0.67	1.17	41.17
evm.model.scaffold_309.24	1.67	1	0	1.33	123.077
evm.model.scaffold_309.31	1	1.25	0.25	1.5	11.956
evm.model.scaffold_309.22	1.83	0.59	0.79	0.79	13.918
evm.model.scaffold_205.119	1.57	0.33	0.57	1.52	22.122
evm.model.scaffold_205.210	0.47	0.47	0	3.06	61.867
evm.model.scaffold_205.147	1.36	0.64	0.45	1.55	33.987
evm.model.scaffold_205.78	0.83	0.83	0.14	2.21	25.238
evm.model.scaffold_205.118	1.71	0.46	0.57	1.26	36.026
evm.model.scaffold_205.149	0.73	1.33	0.24	1.7	29.51
evm.model.scaffold_205.129	0	3.43	0	0.57	152.173
evm.model.scaffold_205.79	1.6	0.8	0.8	0.8	12.543
evm.model.scaffold_205.153	1.41	0.94	0.71	0.94	37.129
evm.model.scaffold_205.219	0.67	0	0	3.33	79.214
evm.model.scaffold_205.166	2	1	0	1	10.96
evm.model.scaffold_205.176	1.47	0.84	0.84	0.84	20.327
evm.model.scaffold_205.167	1.29	0.35	0.12	2.24	68.996
evm.model.scaffold_205.273	1.71	0.29	1.71	0.29	16.851
evm.model.scaffold_205.220	1.65	1.04	0.26	1.04	15.156
evm.model.scaffold_205.196	2.12	0.47	0.47	0.94	11.664
evm.model.scaffold_205.141	1.66	0.68	0.39	1.27	11.866
evm.model.scaffold_205.227	0	1.33	0	2.67	28.934
evm.model.scaffold_205.145	2.06	0.97	0.24	0.73	15.472
evm.model.scaffold_205.73.1	1.68	1.03	0.65	0.65	23.831
evm.model.scaffold_205.262	1.67	1	0.5	0.83	48.382
evm.model.scaffold_205.259	0.89	1.11	0.44	1.56	14.407
evm.model.scaffold_205.272	1.93	0.3	0.89	0.89	12.061
evm.model.scaffold_205.248	1.6	0.8	0.53	1.07	12.281
evm.model.scaffold_205.185	2.24	0.32	0.48	0.96	15.708
evm.model.scaffold_205.252	0.8	2.56	0.32	0.32	34.879
evm.model.scaffold_205.218	0.62	0.31	0	3.08	11.581
evm.model.scaffold_205.226	2.2	0.7	0	1.1	61.45
evm.model.scaffold_205.263	1.18	0.71	1.06	1.06	19.254
evm.model.scaffold_205.271	2	0.31	0.77	0.92	33.497
evm.model.scaffold_205.168	1.1	0.69	0.41	1.79	32.38
evm.model.scaffold_205.148	1.33	1.07	0.53	1.07	54.526
evm.model.scaffold_205.274	1.89	0.91	0.53	0.68	17.944
evm.model.scaffold_205.224	0.73	0.73	0.36	2.18	273.517
evm.model.scaffold_205.173	1.33	1	0.5	1.17	38.474
evm.model.scaffold_205.54	0.86	1	0.57	1.57	22.741
evm.model.scaffold_205.192	1.82	0.18	0	2	11.794
evm.model.scaffold_205.44	0.83	1	1	1.17	10.593
evm.model.scaffold_205.127	1	0.5	0	2.5	10.409
evm.model.scaffold_205.180	1.33	1	0.33	1.33	14.664
evm.model.scaffold_205.208	0.44	0	0.44	3.11	14.66
evm.model.scaffold_205.260	0.47	1.53	0.12	1.88	44.74
evm.model.scaffold_476.10	3	0	0.33	0.67	38.296
evm.model.scaffold_476.9	1.71	0.57	0.71	1	103.493
evm.model.scaffold_324.17	0.86	0.57	0	2.57	38.676
evm.model.scaffold_324.39	1.6	0.53	1.07	0.8	17.841
evm.model.scaffold_324.29	1.38	0.97	0.14	1.52	10.771
evm.model.scaffold_324.32	1.71	1.43	0.57	0.29	14.186
evm.model.scaffold_324.23	3.33	0	0.67	0	10.063
evm.model.scaffold_324.43	2	0.4	0.4	1.2	46.8
evm.model.scaffold_324.24	1.86	0.65	0.84	0.65	10.756
evm.model.scaffold_324.2	1.6	1.2	0.13	1.07	15.578
evm.model.scaffold_324.42	1.36	0.32	0.32	2	16.676
evm.model.scaffold_324.31	1.5	1.25	0.25	1	37.877
evm.model.scaffold_37.114.1	1	1	1	1	53.379
evm.model.scaffold_37.91.1	1	1.33	0.33	1.33	47.064
evm.model.scaffold_37.132	0.44	1.33	0.89	1.33	51.22
evm.model.scaffold_37.131	1.23	1.54	0.31	0.92	62.719
evm.model.scaffold_37.17	1.7	0.48	0.36	1.45	155.354
evm.model.scaffold_37.70	1.6	0.57	0.91	0.91	12.472
evm.model.scaffold_37.37	1.07	0.53	0.27	2.13	2830.09
evm.model.scaffold_37.115	1.33	1.33	0.18	1.16	11.308
evm.model.scaffold_37.52	1.33	0.27	0.27	2.13	12.628
evm.model.scaffold_37.72	1.5	0.75	0.25	1.5	23.068
evm.model.scaffold_37.61	0.57	0	0.57	2.86	101.395
evm.model.scaffold_37.137_evm.model.scaffold_37.138	1.3	1.13	0.43	1.13	26.812
evm.model.scaffold_37.43	0.94	0.47	0.24	2.35	275.277
evm.model.scaffold_37.141	1.45	0	0.73	1.82	55.321
evm.model.scaffold_37.90	2.27	0.67	0.13	0.93	35.322
evm.model.scaffold_37.71	1.38	1.08	0.77	0.77	24.707
evm.model.scaffold_37.18	1.33	0	0.44	2.22	39.432
evm.model.scaffold_37.144	2.1	0.76	0.19	0.95	17.296
evm.model.scaffold_37.41	0.86	0.57	0.29	2.29	1912.36
evm.model.scaffold_37.116	2.89	0.67	0.22	0.22	31.675
evm.model.scaffold_37.143	1.71	0.57	0.29	1.43	30.224
evm.model.scaffold_37.24.1	2	0.84	0.63	0.53	19.683
evm.model.scaffold_37.19	1.33	0.73	0.79	1.15	23.471
evm.model.scaffold_37.63	2.24	0.32	0.96	0.48	38.16
evm.model.scaffold_37.39	1.07	0.53	0.27	2.13	3520.39
evm.model.scaffold_21.69	1.19	0.74	1.04	1.04	16.751
evm.model.scaffold_21.21	1.26	0.84	0.84	1.05	53.49
evm.model.scaffold_21.19	1.51	0.76	0.76	0.97	14.806
evm.model.scaffold_21.39	1.83	0.83	0.33	1	63.041
evm.model.scaffold_21.46	0.89	1.78	0	1.33	48.906
evm.model.scaffold_21.22	1.69	0.62	1.54	0.15	10.572
evm.model.scaffold_21.32	2.29	0.19	0.95	0.57	17.285
evm.model.scaffold_21.38	2.07	0.43	0.29	1.21	29.177
evm.model.scaffold_21.53	2.2	0.49	0.46	0.85	58.708
evm.model.scaffold_21.17	1.9	0.38	0.57	1.14	10.039
evm.model.scaffold_21.54	1.78	0.59	0.44	1.19	12.417
evm.model.scaffold_21.42	1.26	0.42	0.84	1.47	40.068
evm.model.scaffold_21.58	1.58	0.84	0.53	1.05	22.509
evm.model.scaffold_21.59	1.5	0.75	0.5	1.25	247.463
evm.model.scaffold_21.60	1.74	0.43	0.78	1.04	13.741
evm.model.scaffold_21.71	1.91	0.62	0.43	1.05	41.299
evm.model.scaffold_12.101	1.78	0.22	0.44	1.56	55.485
evm.model.scaffold_12.230	1.43	0.86	0.57	1.14	96.803
evm.model.scaffold_12.75	1	0.5	0	2.5	50.502
evm.model.scaffold_12.140	1.68	0.53	0.84	0.95	315.473
evm.model.scaffold_12.278	1.52	0.41	0.55	1.52	14.371
evm.model.scaffold_12.320.1	1.78	0	0	2.22	246.933
evm.model.scaffold_12.66	0.89	0.44	1.33	1.33	11.779
evm.model.scaffold_12.271	1.83	1.26	0	0.91	37.354
evm.model.scaffold_12.41	0	2.67	1.33	0	32.97
evm.model.scaffold_12.170	1.83	0.83	0.5	0.83	36.638
evm.model.scaffold_12.215	1.09	0.73	0.36	1.82	66.505
evm.model.scaffold_12.127.3	2.67	0.5	0.67	0.17	38.167
evm.model.scaffold_12.272.1	1.7	0.92	0.66	0.72	28.749
evm.model.scaffold_12.146.1	1.84	0.24	0.88	1.04	20.861
evm.model.scaffold_12.201	1.77	1.02	0.19	1.02	34.015
evm.model.scaffold_12.28	1	1.33	0.33	1.33	34.304
evm.model.scaffold_12.240	0.86	2.57	0	0.57	45.1
evm.model.scaffold_12.274.3	1.22	0.35	0.52	1.91	29.21
evm.model.scaffold_12.306	1.86	0.47	0.65	1.02	16.68
evm.model.scaffold_12.71	1.91	0.91	0.45	0.73	31.796
evm.model.scaffold_12.244.1	1.63	0.88	0.88	0.63	10.993
evm.model.scaffold_12.74	1.14	0.57	0.19	2.1	152.915
evm.model.scaffold_12.86	1.73	0.54	0.76	0.97	16.651
evm.model.scaffold_12.232	1.45	1.45	0.36	0.73	558.477
evm.model.scaffold_12.226	1.6	0.57	0.69	1.14	13.348
evm.model.scaffold_12.33	2	0.67	0.67	0.67	50.097
evm.model.scaffold_12.248	1.04	0.87	0.7	1.39	17.03
evm.model.scaffold_12.221.2	1.78	0.44	0.89	0.89	124.78
evm.model.scaffold_12.158	1.84	0.43	0.65	1.08	16.434
evm.model.scaffold_12.204	1.41	0.94	0.24	1.41	19.183
evm.model.scaffold_12.149	0.57	0.29	1.71	1.43	14.832
evm.model.scaffold_12.253	1	1	0	2	16.498
evm.model.scaffold_12.222	2.53	0.21	0.42	0.84	61.873
evm.model.scaffold_12.288	1.25	1	0	1.75	15.467
evm.model.scaffold_12.36	1.54	0.62	0.62	1.23	58.033
evm.model.scaffold_12.276	2.15	0.92	0	0.92	43.924
evm.model.scaffold_12.298	2	0	0	2	55.917
evm.model.scaffold_12.80	2.4	1.2	0	0.4	31.601
evm.model.scaffold_12.314	1.82	0.73	0.91	0.55	51.31
evm.model.scaffold_176.314	1.45	0	1.09	1.45	51.952
evm.model.scaffold_176.163	1.29	1.43	0.57	0.71	39.189
evm.model.scaffold_176.196	1.23	1.54	0.62	0.62	13.336
evm.model.scaffold_176.272	1.88	0.24	0.94	0.94	14.558
evm.model.scaffold_176.291	1.8	0.4	0.5	1.3	18.94
evm.model.scaffold_176.22	1.85	0.2	0.68	1.27	22.326
evm.model.scaffold_176.260	2	0	0.67	1.33	14.834
evm.model.scaffold_176.12.1	1.56	0.22	1.33	0.89	14.735
evm.model.scaffold_176.130	1.2	0.8	0.4	1.6	18.712
evm.model.scaffold_176.323.4	1.2	0.9	0.9	1	89.042
evm.model.scaffold_176.315	2	1	0.5	0.5	12.645
evm.model.scaffold_176.76	1.33	0	1.33	1.33	10.292
evm.model.scaffold_176.295	2.5	0	1	0.5	64.266
evm.model.scaffold_176.89	0.89	1.56	0.44	1.11	134.818
evm.model.scaffold_176.335	1.82	0.73	0.91	0.55	13.904
evm.model.scaffold_176.240	0.55	1.09	0.18	2.18	84.106
evm.model.scaffold_176.133	1.44	0.56	1	1	92.595
evm.model.scaffold_176.60	1.63	0.47	0.2	1.69	17.809
evm.model.scaffold_176.170	2.13	0.25	1.13	0.5	62.774
evm.model.scaffold_176.73	1.2	0	1.6	1.2	154.063
evm.model.scaffold_176.276	1.14	0.57	1.14	1.14	19.628
evm.model.scaffold_176.6_evm.model.scaffold_176.7	2.21	0.42	0.42	0.95	40.336
evm.model.scaffold_176.216	1.14	1.14	0.57	1.14	134.411
evm.model.scaffold_176.327.1	2.4	0	0.8	0.8	10.556
evm.model.scaffold_176.296	1.75	1.25	0.5	0.5	123.244
evm.model.scaffold_176.262	1.52	0.97	0.83	0.69	24.789
evm.model.scaffold_176.242	0.67	0.67	0	2.67	105.652
evm.model.scaffold_176.161	1.6	0.8	0.8	0.8	55.042
evm.model.scaffold_176.138.1	1.79	0.83	0.69	0.69	14.945
evm.model.scaffold_176.54	2.55	0.36	0.61	0.48	14.296
evm.model.scaffold_176.172	1.71	0.57	0	1.71	10.002
evm.model.scaffold_176.35	1.26	0.44	0.89	1.41	34.293
evm.model.scaffold_176.220	2.13	0.45	0.32	1.1	50.928
evm.model.scaffold_176.80	1.33	0	1.33	1.33	1304.21
evm.model.scaffold_176.241	2.67	0.22	0	1.11	130.642
evm.model.scaffold_176.92	1.66	0.97	0.55	0.83	15.457
evm.model.scaffold_176.290	1.67	1.33	0	1	147.438
evm.model.scaffold_176.186	1.82	0.73	0.36	1.09	55.23
evm.model.scaffold_176.64.1	2.06	0.59	0.41	0.94	76.225
evm.model.scaffold_176.210	1.33	0.89	0.89	0.89	19.966
evm.model.scaffold_176.188	1.54	0.92	0.92	0.62	37.143
evm.model.scaffold_176.279	1.22	0.5	0.22	2.06	25.686
evm.model.scaffold_176.243	2.05	0.41	0.82	0.72	15.763
evm.model.scaffold_176.78	1.67	0	1	1.33	2330.76
evm.model.scaffold_176.218.1	1.79	0.14	1.24	0.83	29.516
evm.model.scaffold_176.305	1.14	0.86	0.29	1.71	45.524
evm.model.scaffold_176.199	1.52	1.14	0.57	0.76	63.044
evm.model.scaffold_176.228	1.69	1.08	0.31	0.92	15.492
evm.model.scaffold_176.151	1.6	0.8	0.27	1.33	12.793
evm.model.scaffold_176.132	1.43	0.57	0.67	1.33	15.775
evm.model.scaffold_176.277	1.14	1.71	1.14	0	17.413
evm.model.scaffold_176.235	2.18	0.73	0	1.09	130.327
evm.model.scaffold_176.267	1.73	0.53	0.53	1.2	11.168
evm.model.scaffold_176.261	0.8	0.8	0	2.4	17.114
evm.model.scaffold_176.316	1.69	1	0.69	0.62	36.437
evm.model.scaffold_176.329	1.5	2	0	0.5	16.688
evm.model.scaffold_176.165	1.93	0.89	0.59	0.59	12.097
evm.model.scaffold_176.238	2.22	1.78	0	0	98.161
evm.model.scaffold_176.332	1.75	0.75	0	1.5	16.524
evm.model.scaffold_176.79	1.43	0	1.14	1.43	3227.67
evm.model.scaffold_176.213	0.53	1.33	0	2.13	57.327
evm.model.scaffold_176.298	1.88	0.88	0.38	0.88	101.176
evm.model.scaffold_176.265	1.93	0.69	0	1.38	15.358
evm.model.scaffold_176.139	1.25	1	0.25	1.5	48.548
evm.model.scaffold_176.169	2.17	0.67	0.17	1	18.492
evm.model.scaffold_176.74	0	0	1.33	2.67	22.479
evm.model.scaffold_176.131	2.34	0.59	0.59	0.49	10.651
evm.model.scaffold_176.246	1.78	0.56	1.11	0.56	34.023
evm.model.scaffold_176.104	2.86	0	0	1.14	48.051
evm.model.scaffold_176.77	1.45	0	1.45	1.09	1305.81
evm.model.scaffold_176.266	0.86	2.29	0.29	0.57	77.914
evm.model.scaffold_176.330	0.8	2	0	1.2	14.233
evm.model.scaffold_176.264	4	0	0	0	40.114
evm.model.scaffold_176.200	2.5	0.75	0.25	0.5	20.215
evm.model.scaffold_176.278	1.54	1.54	0	0.92	74.605
evm.model.scaffold_176.103	1.6	0.53	0.8	1.07	13.933
evm.model.scaffold_176.333	2.15	0.31	0.31	1.23	20.279
evm.model.scaffold_176.83	1.71	0	0.57	1.71	235.166
evm.model.scaffold_176.287	1.18	0.47	0.94	1.41	71.355
evm.model.scaffold_176.212	1.09	0.48	0.73	1.7	75.794
evm.model.scaffold_176.337	1.8	0.41	1.02	0.78	30.401
evm.model.scaffold_176.156	1.12	0.48	1.28	1.12	1179.08
evm.model.scaffold_176.282	0.55	0.91	0.36	2.18	66.511
evm.model.scaffold_176.297	2.06	0.9	0.26	0.77	118.857
evm.model.scaffold_176.178	0.8	1.6	0.8	0.8	29.092
evm.model.scaffold_176.289	1.71	1.14	0.57	0.57	40.042
evm.model.scaffold_176.203	1.95	0.65	0.43	0.97	18.779
evm.model.scaffold_176.8	1.9	0.38	0.76	0.95	48.822
evm.model.scaffold_41.38	1.33	0.53	1.07	1.07	53.104
evm.model.scaffold_41.24	1.76	0.39	0.68	1.17	10.044
evm.model.scaffold_41.48	1.07	1.33	0	1.6	27.678
evm.model.scaffold_41.14	2	0	0	2	48.18
evm.model.scaffold_41.16	2.4	0	0	1.6	28.924
evm.model.scaffold_41.26	2.18	0.36	0.73	0.73	23.1
evm.model.scaffold_464.1	0.8	0	0.8	2.4	14.649
evm.model.scaffold_60.15	0.92	1.54	0.62	0.92	85.692
evm.model.scaffold_60.41	1.38	0.52	0.65	1.46	11.29
evm.model.scaffold_60.56	1.14	0.86	1.14	0.86	11.555
evm.model.scaffold_60.21	2.29	0.29	0	1.43	20.949
evm.model.scaffold_60.54	2.71	0.43	0.43	0.43	10.69
evm.model.scaffold_60.51.1	1.82	0	1.09	1.09	15.65
evm.model.scaffold_60.25	1.91	0.87	0.35	0.87	15.743
evm.model.scaffold_168.26	1.75	0.75	0.5	1	14.586
evm.model.scaffold_168.24	1.68	0.42	0	1.89	10.978
evm.model.scaffold_168.3	1.4	1.4	0	1.2	17.578
evm.model.scaffold_168.31	1.75	1.5	0	0.75	10.145
evm.model.scaffold_168.40	1.18	1.65	0.12	1.06	51.718
evm.model.scaffold_168.45	0.92	0.92	0.77	1.38	34.437
evm.model.scaffold_168.10	0.7	0.87	0.17	2.26	16.53
evm.model.scaffold_168.14	1.83	0.5	0.33	1.33	16.585
evm.model.scaffold_100.915	1.52	0.69	0.55	1.24	36.899
evm.model.scaffold_100.38	2.5	0.5	0	1	166.22
evm.model.scaffold_100.1009	3.33	0	0.17	0.5	13.211
evm.model.scaffold_100.1289	1.28	1.12	0.08	1.52	105.734
evm.model.scaffold_100.116	1.26	1.05	0.84	0.84	48.447
evm.model.scaffold_100.1161	0.75	1	0.75	1.5	158.003
evm.model.scaffold_100.1692	1.23	0.92	0.31	1.54	16.486
evm.model.scaffold_100.1335	1.26	0.84	1.26	0.63	35.007
evm.model.scaffold_100.331	0.63	1.05	0.63	1.68	107.066
evm.model.scaffold_100.1259	1.75	0.5	0	1.75	30.798
evm.model.scaffold_100.388	1.33	0.67	0.86	1.14	12.976
evm.model.scaffold_100.1154	1.6	0.32	0.8	1.28	173.686
evm.model.scaffold_100.1137	1.69	1.08	0.15	1.08	35.499
evm.model.scaffold_100.1263	0.89	0.67	0.22	2.22	49.099
evm.model.scaffold_100.97	1.54	0.77	0.62	1.08	26.295
evm.model.scaffold_100.742	2	0.6	0.54	0.87	16.172
evm.model.scaffold_100.98	1.6	0.8	0.6	1	31.961
evm.model.scaffold_100.660	0.29	0.86	0.57	2.29	11.999
evm.model.scaffold_100.99	2.24	0	0.32	1.44	19.024
evm.model.scaffold_100.697	1.56	0.44	0	2	380.173
evm.model.scaffold_100.1595	1.84	0.65	0.22	1.3	57.095
evm.model.scaffold_100.1710	0.5	0.75	0.25	2.5	18.929
evm.model.scaffold_100.1543	1.19	0.94	0.51	1.36	17.05
evm.model.scaffold_100.897	0.89	1.78	0.44	0.89	156.998
evm.model.scaffold_100.1625	2	0.23	0.54	1.23	114.871
evm.model.scaffold_100.397	1.55	0.57	0.53	1.35	13.6
evm.model.scaffold_100.848	2.18	0.44	0.87	0.51	44.545
evm.model.scaffold_100.142	1.27	0.36	1.09	1.27	184.416
evm.model.scaffold_100.745	1.24	0.97	0.97	0.83	15.188
evm.model.scaffold_100.785	0.87	0.7	0.52	1.91	57.413
evm.model.scaffold_100.1144	2.19	0.58	0.58	0.65	15.652
evm.model.scaffold_100.75	1.63	0.65	0.65	1.06	18.453
evm.model.scaffold_100.415	2.46	0.31	0.31	0.92	111.524
evm.model.scaffold_100.1438	2	1	0.14	0.86	16.531
evm.model.scaffold_100.205	2.43	0.57	0.57	0.43	49.914
evm.model.scaffold_100.656	1.7	0.77	0.43	1.11	34.862
evm.model.scaffold_100.1737	1.33	1.07	1.07	0.53	15.711
evm.model.scaffold_100.1400	2.1	0.76	0.38	0.76	14.339
evm.model.scaffold_100.439	2.15	0.31	0	1.54	39.826
evm.model.scaffold_100.643	0.57	1.71	0	1.71	73.395
evm.model.scaffold_100.1277	0.29	1.14	1.71	0.86	14.562
evm.model.scaffold_100.375	1.33	0.33	0.83	1.5	16.701
evm.model.scaffold_100.510	1.38	0.85	1	0.77	11.076
evm.model.scaffold_100.61	0.6	1.3	0.2	1.9	27.167
evm.model.scaffold_100.465	2.24	0.64	0.48	0.64	53.931
evm.model.scaffold_100.890	1	2	0.33	0.67	10.158
evm.model.scaffold_100.1251.1	1.5	0.75	0.75	1	22.806
evm.model.scaffold_100.971	1.71	0.29	1.14	0.86	23.239
evm.model.scaffold_100.143	0.86	0.57	0.57	2	140.829
evm.model.scaffold_100.1697	0.36	1.09	0.36	2.18	21.378
evm.model.scaffold_100.896	1.8	1.2	0.6	0.4	149.887
evm.model.scaffold_100.1439	0.89	0.89	0.67	1.56	46.279
evm.model.scaffold_100.1577	1.74	0.7	0.52	1.04	15.891
evm.model.scaffold_100.52	1.78	0.59	1.19	0.44	31.031
evm.model.scaffold_100.78	0.75	1	0.75	1.5	30.163
evm.model.scaffold_100.1262	0.57	1.14	1.71	0.57	12.032
evm.model.scaffold_100.1164	1.68	0.74	0.21	1.37	130.736
evm.model.scaffold_100.1084	1.33	0	0.89	1.78	27.543
evm.model.scaffold_100.1540	0	1	0	3	10.978
evm.model.scaffold_100.531	0.5	1.5	2	0	33.779
evm.model.scaffold_100.582	1.22	0.52	0.7	1.57	22.776
evm.model.scaffold_100.1513	1.5	0	0.5	2	37.991
evm.model.scaffold_100.1795	1.57	0.57	0.57	1.29	79.155
evm.model.scaffold_100.34	1.33	1	0.67	1	78.892
evm.model.scaffold_100.960	0.74	0.74	0.15	2.37	14.116
evm.model.scaffold_100.1010	1.9	0.38	0.57	1.14	10.376
evm.model.scaffold_100.1274	1.74	0.82	0.56	0.87	28.856
evm.model.scaffold_100.1906_evm.model.scaffold_100.1907	1.75	0.62	0.76	0.87	12.436
evm.model.scaffold_100.1821	1.76	0.48	0.64	1.12	41.098
evm.model.scaffold_100.36	0.74	1.04	0	2.22	84.423
evm.model.scaffold_100.1547.1	0.83	0.97	0.41	1.79	25.63
evm.model.scaffold_100.851.2	1.08	0.58	0.42	1.92	14.028
evm.model.scaffold_100.667	1.82	0.61	0.12	1.45	11.419
evm.model.scaffold_100.1079	1.57	1	0.43	1	17.708
evm.model.scaffold_100.1216	1.4	0.7	0.3	1.6	177.837
evm.model.scaffold_100.1581	1.85	1.23	0	0.92	13.516
evm.model.scaffold_100.1242	1.63	0.74	0.74	0.89	28.614
evm.model.scaffold_100.60	1.6	0.53	0.27	1.6	85.768
evm.model.scaffold_100.827	1.41	0.67	0.59	1.33	69.295
evm.model.scaffold_100.1020	1.91	0.35	0.52	1.22	14.844
evm.model.scaffold_100.858	2.29	0.57	0	1.14	20.775
evm.model.scaffold_100.474	0.86	0.86	0	2.29	26.236
evm.model.scaffold_100.507	1.89	0.51	0.55	1.05	52.569
evm.model.scaffold_100.280	1.85	0.54	0.59	1.02	12.11
evm.model.scaffold_100.900	1.55	0.39	1.16	0.9	40.909
evm.model.scaffold_100.1172	1.38	1.25	0.25	1.13	64.083
evm.model.scaffold_100.809	1.58	0.61	0.36	1.45	46.89
evm.model.scaffold_100.554	1.2	0.67	0.67	1.47	48.674
evm.model.scaffold_100.1508	0.92	0.92	1.54	0.62	136.567
evm.model.scaffold_100.690	0.8	1	0	2.2	55.159
evm.model.scaffold_100.1206	1	0.5	1	1.5	117.375
evm.model.scaffold_100.171	1.67	0.33	1	1	14.044
evm.model.scaffold_100.384	1.71	1.14	0.57	0.57	16.694
evm.model.scaffold_100.1359	1.74	1.04	0.7	0.52	14.604
evm.model.scaffold_100.389	2.18	0.36	0.36	1.09	11.002
evm.model.scaffold_100.1466	1.33	0	1.52	1.14	11.417
evm.model.scaffold_100.1695	1.33	0.67	0.57	1.43	55.242
evm.model.scaffold_100.941	2	0	0.5	1.5	50.986
evm.model.scaffold_100.125	2.53	0.53	0.67	0.27	64.006
evm.model.scaffold_100.15	1.33	1.33	0.4	0.93	112.974
evm.model.scaffold_100.348	1.09	0.73	0	2.18	57.06
evm.model.scaffold_100.173	0.95	0.76	0	2.29	15.926
evm.model.scaffold_100.1002	1.5	0.5	0	2	33.795
evm.model.scaffold_100.720	1.63	0.41	0.9	1.06	16.663
evm.model.scaffold_100.1333	0.94	1.18	0.71	1.18	38.199
evm.model.scaffold_100.367	1.12	0.64	0.24	2	30.241
evm.model.scaffold_100.420	1.89	0.63	1.05	0.42	39.581
evm.model.scaffold_100.1136	0.84	0.84	0.21	2.11	314.552
evm.model.scaffold_100.1384	1.45	1.45	0	1.09	630.558
evm.model.scaffold_100.292	1.85	0.62	0.62	0.92	44.301
evm.model.scaffold_100.1306	1.23	0.62	0.31	1.85	10.623
evm.model.scaffold_100.1247	1.83	0.67	0.83	0.67	12.893
evm.model.scaffold_100.300	1.5	1.5	0.5	0.5	15.769
evm.model.scaffold_100.569	1.71	0.86	0.57	0.86	22.003
evm.model.scaffold_100.702	1.33	0.67	0	2	93.265
evm.model.scaffold_100.1473	1.58	0.42	0.75	1.25	12.676
evm.model.scaffold_100.1672	2.8	0	0.4	0.8	128.719
evm.model.scaffold_100.1766	2.29	1.14	0.57	0	23.124
evm.model.scaffold_100.226	2.22	0	0.44	1.33	11.391
evm.model.scaffold_100.309	0.62	0.92	0.31	2.15	23.149
evm.model.scaffold_100.1098	1.69	0.62	0.31	1.38	13.041
evm.model.scaffold_100.73	0.86	1.14	0.29	1.71	18.556
evm.model.scaffold_100.714	1.89	0.42	0.42	1.26	161.585
evm.model.scaffold_100.114	1.13	1.13	0.25	1.5	40.566
evm.model.scaffold_100.10	0.24	1.18	0.71	1.88	26.979
evm.model.scaffold_100.505	2.12	0.71	0	1.18	68.871
evm.model.scaffold_100.838	1.94	0.73	0.85	0.48	224.636
evm.model.scaffold_100.1062	0.8	0	2.4	0.8	10.445
evm.model.scaffold_100.19	1.14	1.14	0.69	1.03	44.221
evm.model.scaffold_100.359	1.79	0.74	0.63	0.84	92.648
evm.model.scaffold_100.154	2	0.67	0	1.33	82.702
evm.model.scaffold_100.392	1.43	0.57	1.43	0.57	18.38
evm.model.scaffold_100.704.2	1.88	0.38	0.38	1.38	20.333
evm.model.scaffold_100.863	1.05	1.26	0.53	1.16	14.264
evm.model.scaffold_100.889	1.45	1.09	0.73	0.73	10.277
evm.model.scaffold_100.351	1.33	0.33	1.17	1.17	29.333
evm.model.scaffold_100.814	1.18	0.82	0.47	1.53	12.022
evm.model.scaffold_100.1360	0.62	1.23	0.62	1.54	56.157
evm.model.scaffold_100.1328	2	0	1.33	0.67	18.913
evm.model.scaffold_100.631	1.75	0.75	1	0.5	34.811
evm.model.scaffold_100.875_evm.model.scaffold_100.876	2.24	0.47	0.24	1.06	31.592
evm.model.scaffold_100.984	2.34	0.55	0.41	0.69	17.107
evm.model.scaffold_100.1904	1.87	0	0.8	1.33	14.126
evm.model.scaffold_100.1038	1.04	0.96	0.87	1.13	12.995
evm.model.scaffold_100.1011	1.47	0.63	0.42	1.47	12.651
evm.model.scaffold_100.442	1.41	1.41	0.24	0.94	19.73
evm.model.scaffold_100.1516	2.57	0.71	0	0.71	20.988
evm.model.scaffold_100.802	1.14	0	0.57	2.29	138.441
evm.model.scaffold_100.1514	1.21	0.48	0.36	1.94	12.563
evm.model.scaffold_100.482	1.54	0.31	0.92	1.23	134.954
evm.model.scaffold_100.856	0.8	1.6	0	1.6	87.057
evm.model.scaffold_100.1023	1.85	0.42	0.72	1.01	63.471
evm.model.scaffold_100.1339	1.75	0.75	0.75	0.75	70.878
evm.model.scaffold_100.1013	1.33	0.95	1.14	0.57	13.907
evm.model.scaffold_100.119	1.27	0.91	0.73	1.09	26.942
evm.model.scaffold_100.1015.1	1.57	0.72	0.46	1.25	40.136
evm.model.scaffold_100.176	0.78	1.04	0.26	1.91	14.772
evm.model.scaffold_100.1321	1	0.5	0.25	2.25	30.571
evm.model.scaffold_100.323	0.8	2	0	1.2	213.225
evm.model.scaffold_100.1683	1.56	0.67	0.44	1.33	22.923
evm.model.scaffold_100.881.1	2.31	0.31	0.46	0.92	22.759
evm.model.scaffold_100.1394	1.7	1.33	0	0.97	24.209
evm.model.scaffold_100.49	1.92	0.4	0.56	1.12	31.217
evm.model.scaffold_100.1805	1.6	0.6	0.67	1.13	23.64
evm.model.scaffold_100.1586	1.11	0.89	1.11	0.89	17.948
evm.model.scaffold_100.1752	1.56	0.67	0.67	1.11	22.179
evm.model.scaffold_100.1856	0	3	1	0	16.845
evm.model.scaffold_100.1753	1.14	0.86	0.57	1.43	16.098
evm.model.scaffold_100.1393	2	0.33	0.17	1.5	23.241
evm.model.scaffold_100.1313	1.22	0.56	0.44	1.78	23.788
evm.model.scaffold_100.1454	1.78	1.33	0.89	0	27.356
evm.model.scaffold_100.1548	1.6	0.53	1.6	0.27	73.902
evm.model.scaffold_100.51	2.8	0	0.8	0.4	21.89
evm.model.scaffold_100.1414	0.89	0.44	0.89	1.78	14.894
evm.model.scaffold_100.1046	1.62	0.76	0.32	1.3	109.267
evm.model.scaffold_100.1058	1.91	0.78	0.43	0.87	11.262
evm.model.scaffold_100.990	1.8	1	0.2	1	149.785
evm.model.scaffold_100.57	1.89	0.42	0.84	0.84	42.942
evm.model.scaffold_100.1191	1.07	0.8	0.8	1.33	12.568
evm.model.scaffold_100.1044	1.6	1.07	0	1.33	71.688
evm.model.scaffold_100.1171	2.07	0.55	0.55	0.83	35.281
evm.model.scaffold_100.187	1.05	1.47	0.21	1.26	11.898
evm.model.scaffold_100.158	0.5	1.5	0	2	27.777
evm.model.scaffold_100.1397	1.02	1.19	0.51	1.28	12.112
evm.model.scaffold_100.312	2.37	0.44	0.44	0.74	28.501
evm.model.scaffold_100.1238	1.22	0.17	0.7	1.91	12.576
evm.model.scaffold_100.1118	1.45	0	0	2.55	86.929
evm.model.scaffold_100.1776	1.16	0.89	0.36	1.6	19.023
evm.model.scaffold_100.945	1	2	0	1	16.102
evm.model.scaffold_100.1847	1.83	1	0.83	0.33	34.068
evm.model.scaffold_100.356	1.33	1.14	0.86	0.67	27.007
evm.model.scaffold_100.1813	1.69	0.56	0.56	1.19	22.115
evm.model.scaffold_100.218	1.57	1.04	0	1.39	105.973
evm.model.scaffold_100.1347	3	1	0	0	23.891
evm.model.scaffold_100.683	2.32	0.63	0.21	0.84	89.724
evm.model.scaffold_100.227	1.33	0	0	2.67	10.685
evm.model.scaffold_100.361	1.38	0.55	0.28	1.79	64.702
evm.model.scaffold_100.434	1.89	0.42	0.32	1.37	40.375
evm.model.scaffold_100.104	3.2	0.27	0.27	0.27	12.097
evm.model.scaffold_100.1485	2	2	0	0	149.674
evm.model.scaffold_100.475	0.86	1.43	0.86	0.86	310.569
evm.model.scaffold_100.535	2.6	0.6	0	0.8	13.994
evm.model.scaffold_100.318	1.57	0.57	0.43	1.43	19.976
evm.model.scaffold_100.1674	1.81	0.52	0.65	1.03	22.522
evm.model.scaffold_100.186	0.63	0.21	0.21	2.95	31.763
evm.model.scaffold_100.1188	1.36	1	0.73	0.91	22.727
evm.model.scaffold_100.1149	1.85	0.59	0.59	0.98	35.91
evm.model.scaffold_100.942.1	2.13	0.53	0.8	0.53	16.328
evm.model.scaffold_100.1227	1.71	0.29	0	2	14.417
evm.model.scaffold_100.283	1.33	0.5	0.5	1.67	602.227
evm.model.scaffold_100.1181	1.55	0.65	0.65	1.14	20.24
evm.model.scaffold_100.306	2.15	0.68	0.49	0.68	45.951
evm.model.scaffold_100.609	1.5	1	0.5	1	18.188
evm.model.scaffold_100.956	0.92	0.92	0.62	1.54	13.452
evm.model.scaffold_100.1861	1.74	0.17	0.87	1.22	16.69
evm.model.scaffold_100.166	1.88	0.5	0.13	1.5	14.348
evm.model.scaffold_100.1150.5	1.6	0.64	0.48	1.28	106.173
evm.model.scaffold_100.1452	1.57	1.39	0.17	0.87	24.758
evm.model.scaffold_100.709	0.97	1.24	0.28	1.52	12.625
evm.model.scaffold_100.778	0.86	1.43	0.57	1.14	28.429
evm.model.scaffold_100.489	1.38	0.63	0.63	1.38	39.662
evm.model.scaffold_100.248.1	1.33	0.44	0.56	1.67	24.769
evm.model.scaffold_100.800	1.74	0.52	0.7	1.04	15.671
evm.model.scaffold_100.1106	1.85	1.23	0.62	0.31	49.43
evm.model.scaffold_100.1241	0.89	0.59	0.59	1.93	128.793
evm.model.scaffold_100.986	1.6	1.03	0.91	0.46	31.42
evm.model.scaffold_100.103	2	0.91	0.36	0.73	14.561
evm.model.scaffold_100.644	0.5	3	0.5	0	124.648
evm.model.scaffold_100.1162	1.41	0.71	0	1.88	68.374
evm.model.scaffold_100.373	1.78	0	0.89	1.33	295.1
evm.model.scaffold_100.910	2.25	0	0.25	1.5	29.083
evm.model.scaffold_100.862	1.84	0.96	0.32	0.88	25.227
evm.model.scaffold_100.830	1.82	0	1.09	1.09	16.622
evm.model.scaffold_100.1103	1.71	0.71	0.29	1.29	31.798
evm.model.scaffold_100.381	0.94	1.65	0	1.41	28.512
evm.model.scaffold_100.1903	1.43	0	0.86	1.71	10.889
evm.model.scaffold_100.537.1	0.8	2	0	1.2	534.717
evm.model.scaffold_100.591	2.22	0.89	0.44	0.44	13.319
evm.model.scaffold_100.374	2	1.33	0	0.67	25.839
evm.model.scaffold_100.253	1	1.5	1.25	0.25	35.681
evm.model.scaffold_100.1184	1.63	0.67	0.96	0.74	12.632
evm.model.scaffold_100.952	2.15	0.31	0.31	1.23	84.336
evm.model.scaffold_100.1349	2.32	0.21	0.42	1.05	53.865
evm.model.scaffold_100.452	1.65	1.53	0.12	0.71	24.531
evm.model.scaffold_100.1377	2.05	0.65	0.56	0.74	25.166
evm.model.scaffold_100.773.1	0	1.33	0.67	2	103.401
evm.model.scaffold_100.1087	1.64	0.41	0.72	1.23	260.474
evm.model.scaffold_100.653.1	1.67	1.33	0.33	0.67	46.989
evm.model.scaffold_100.687.2	1.71	0.67	0.67	0.95	27.993
evm.model.scaffold_100.1027	1.52	0.67	0.48	1.33	35.172
evm.model.scaffold_100.185	1.55	0.52	0.26	1.68	11.096
evm.model.scaffold_100.1408	0.86	1.43	0	1.71	15.941
evm.model.scaffold_100.981	2.5	1.5	0	0	11.899
evm.model.scaffold_100.1318.1	1.85	0.15	0.62	1.38	18.232
evm.model.scaffold_100.460	1.78	0	1.33	0.89	10.041
evm.model.scaffold_100.350	2	0.53	1.07	0.4	19.219
evm.model.scaffold_100.1854	0.89	0.44	0.44	2.22	28.655
evm.model.scaffold_100.481	1.71	0.57	0.33	1.39	19.321
evm.model.scaffold_100.1503	2	1.2	0	0.8	72.09
evm.model.scaffold_100.1720	1.51	0.42	1.04	1.04	10.815
evm.model.scaffold_100.353	0.9	1	0.1	2	35.083
evm.model.scaffold_100.1148	1.78	0.59	0.74	0.89	15.005
evm.model.scaffold_100.17	0.5	2	0	1.5	115.878
evm.model.scaffold_100.1116	1.44	0.78	0.56	1.22	26.241
evm.model.scaffold_100.651	1.68	0.42	0	1.89	27.403
evm.model.scaffold_100.1030	1.63	1.19	0.15	1.04	10.399
evm.model.scaffold_100.299	1.08	1.08	0.46	1.38	62.596
evm.model.scaffold_100.1240	0.83	0.17	1	2	77.406
evm.model.scaffold_100.650	1.6	0.53	0.67	1.2	10.231
evm.model.scaffold_100.487	1.33	0.33	0.33	2	18.71
evm.model.scaffold_100.1111	3	0.5	0	0.5	240.232
evm.model.scaffold_100.1440	1.45	0.73	0.73	1.09	37.882
evm.model.scaffold_100.891	0	1.33	0.67	2	361.589
evm.model.scaffold_100.540	1.88	0.24	0.94	0.94	94.978
evm.model.scaffold_100.932.2	2.05	0.34	0.68	0.93	40.624
evm.model.scaffold_100.884	0	2	1	1	106.548
evm.model.scaffold_100.1537	0.67	1.33	1.33	0.67	49.033
evm.model.scaffold_100.905	2	0.67	0.61	0.73	16.543
evm.model.scaffold_100.1597	0.65	0.47	0.37	2.51	15.001
evm.model.scaffold_100.1905	1.93	0.28	0.55	1.24	10.274
evm.model.scaffold_100.921	1.47	1	0.42	1.11	53.864
evm.model.scaffold_100.456	2	0.67	0	1.33	14.853
evm.model.scaffold_100.330	1.33	1.78	0	0.89	215.905
evm.model.scaffold_100.934	1.21	0.97	0.85	0.97	18.158
evm.model.scaffold_100.1787	1.24	1.14	0.1	1.52	26.715
evm.model.scaffold_100.357	1.47	0.63	0.42	1.47	103.29
evm.model.scaffold_100.1288	0.78	0.87	0.09	2.26	38.706
evm.model.scaffold_100.206	2.86	0	0	1.14	57.006
evm.model.scaffold_100.563	1.45	0.36	0.36	1.82	270.379
evm.model.scaffold_100.846	1.78	0.67	0.67	0.89	14.912
evm.model.scaffold_100.1573	2.07	0.28	0.55	1.1	56.494
evm.model.scaffold_100.695	1.04	0.7	1.04	1.22	50.304
evm.model.scaffold_100.287	2	0.44	0.44	1.11	114.46
evm.model.scaffold_100.498	0.8	1.2	0.4	1.6	12.161
evm.model.scaffold_100.1699	1.33	0.33	1	1.33	10.057
evm.model.scaffold_100.719	1.6	0	0	2.4	119.181
evm.model.scaffold_100.335	0.89	1.11	0.22	1.78	24.376
evm.model.scaffold_100.917	1.14	0.57	1.14	1.14	88.845
evm.model.scaffold_100.1879	1.55	1	0.36	1.09	49.088
evm.model.scaffold_100.383	1.48	0.59	0.3	1.63	20.223
evm.model.scaffold_100.1082	1.89	0.68	0.53	0.91	17.493
evm.model.scaffold_100.1389	1.23	0.62	0.62	1.54	43.88
evm.model.scaffold_100.320	1.08	0.92	0.77	1.23	12.712
evm.model.scaffold_100.857	1.71	1.52	0.19	0.57	19.829
evm.model.scaffold_100.506	2.12	0.94	0.71	0.24	35.386
evm.model.scaffold_100.140	1	0	0	3	12.547
evm.model.scaffold_100.1063	1.5	0.7	1.1	0.7	12.221
evm.model.scaffold_100.399	0	0	4	0	15.896
evm.model.scaffold_100.493	2.11	0	0.63	1.26	28.449
evm.model.scaffold_100.1395	2.15	0.31	0.62	0.92	17.325
evm.model.scaffold_100.149	1.49	0.28	0.74	1.49	21.343
evm.model.scaffold_100.1671	2.32	0.39	0.26	1.03	215.952
evm.model.scaffold_100.520	2.18	0.36	0.73	0.73	12.328
evm.model.scaffold_100.1351	1.14	0.57	0.57	1.71	20.215
evm.model.scaffold_100.394	2.86	0	0.57	0.57	11.47
evm.model.scaffold_100.718	1.33	0.89	0.44	1.33	19.028
evm.model.scaffold_100.1654.1	2.82	0.24	0.24	0.71	29.452
evm.model.scaffold_100.908	1.82	0.97	0.73	0.48	25.985
evm.model.scaffold_100.532	1	1	1.25	0.75	15.017
evm.model.scaffold_100.1667	1.66	0.69	0.69	0.97	11.398
evm.model.scaffold_100.1744	0.67	1.33	1.33	0.67	18.41
evm.model.scaffold_100.499_evm.model.scaffold_100.500	1.41	0.63	0.63	1.33	10.402
evm.model.scaffold_100.556	0.42	1.05	0.53	2	24.984
evm.model.scaffold_100.54	2	0.17	1	0.83	23.381
evm.model.scaffold_100.686	1.33	0.22	0.44	2	21.764
evm.model.scaffold_100.1228	1.8	0.2	0	2	16.44
evm.model.scaffold_100.904	2.57	0.29	0.29	0.86	19.108
evm.model.scaffold_100.794.1	2.22	0.89	0.15	0.74	11.847
evm.model.scaffold_100.635	1.18	1.41	0.47	0.94	344.442
evm.model.scaffold_100.1745	1.08	0.77	0.46	1.69	39.109
evm.model.scaffold_100.1539	1.56	0.67	0.67	1.11	24.652
evm.model.scaffold_100.1499	1.75	0.88	0.25	1.13	11.743
evm.model.scaffold_100.1556	1.26	1.89	0	0.84	225.728
evm.model.scaffold_100.137	1.57	0.46	0.39	1.57	10.919
evm.model.scaffold_100.50	1.43	0	0.57	2	67.577
evm.model.scaffold_100.791.1	1.18	1.18	0.24	1.41	18.218
evm.model.scaffold_100.56.1	1.51	0.71	0.71	1.07	235.564
evm.model.scaffold_100.744	1.93	0.44	0	1.63	10.723
evm.model.scaffold_100.1474	2	0	2	0	20.923
evm.model.scaffold_100.1658	3.2	0.4	0.4	0	41.713
evm.model.scaffold_100.40	2.67	0	0	1.33	122.99
evm.model.scaffold_100.701	1.71	0.57	0.29	1.43	13.454
evm.model.scaffold_100.337	1.43	0.95	0.29	1.33	77.643
evm.model.scaffold_100.922	1.78	1	0.22	1	157.046
evm.model.scaffold_100.637	2.67	0.89	0	0.44	60.018
evm.model.scaffold_100.473	0.62	0	0	3.38	12.297
evm.model.scaffold_100.285	1.2	0.8	0	2	98.706
evm.model.scaffold_100.1765	1.15	0.69	1.08	1.08	20.227
evm.model.scaffold_100.833	1.57	0.43	1	1	19.454
evm.model.scaffold_100.414.1	0.94	0.71	1.18	1.18	33.74
evm.model.scaffold_100.1696	1	0.5	0.5	2	28.401
evm.model.scaffold_100.138	1	1.33	0.33	1.33	14.972
evm.model.scaffold_100.1421	1.88	0.46	0.5	1.17	49.572
evm.model.scaffold_100.1455	1.45	1.09	0	1.45	43.92
evm.model.scaffold_100.574	2	0.42	0.32	1.26	57.157
evm.model.scaffold_100.1153	1.76	0.98	0.49	0.78	13.098
evm.model.scaffold_100.1536	1.78	0.67	0.44	1.11	14.238
evm.model.scaffold_100.741	2.25	0.5	0.5	0.75	12.378
evm.model.scaffold_100.828	1.45	0	1.09	1.45	199.976
evm.model.scaffold_100.127	1.73	0.8	0.4	1.07	35.665
evm.model.scaffold_100.1160	1.2	0.6	0.2	2	81.843
evm.model.scaffold_100.1434	0.57	0.57	1.71	1.14	134.393
evm.model.scaffold_100.1135	2.25	1	0.5	0.25	28.734
evm.model.scaffold_100.1305.4	2.17	0.91	0.46	0.46	12.489
evm.model.scaffold_100.1638.2	1.82	0.12	0.73	1.33	23.781
evm.model.scaffold_100.871	2.18	0.55	0.55	0.73	44.885
evm.model.scaffold_100.290.1	1.71	0.57	0.57	1.14	49.806
evm.model.scaffold_100.652.1	0	1	0	3	23.131
evm.model.scaffold_100.345	1.6	0.8	0.8	0.8	21.871
evm.model.scaffold_100.1490	1.8	0.8	0	1.4	47.829
evm.model.scaffold_100.1619	1.14	0.57	0.86	1.43	10.464
evm.model.scaffold_100.217	0.4	2.4	0.8	0.4	51.201
evm.model.scaffold_100.1700	1.33	0	1.33	1.33	16.277
evm.model.scaffold_100.1253.2	1.67	0.78	0.44	1.11	19.459
evm.model.scaffold_100.413	2.29	0.57	0.86	0.29	41.219
evm.model.scaffold_100.182	1.67	0.67	0.67	1	25.417
evm.model.scaffold_100.708	0.8	0.8	1	1.4	12.236
evm.model.scaffold_100.1374	1.9	0	0.76	1.33	45.119
evm.model.scaffold_100.909	2	0	0	2	90.164
evm.model.scaffold_100.750	1.96	0.44	0.65	0.95	30.244
evm.model.scaffold_100.1316	1.4	0.4	0.6	1.6	52.699
evm.model.scaffold_100.1550	1	1.5	0	1.5	41.624
evm.model.scaffold_100.445	1.7	0.3	0.3	1.7	16.973
evm.model.scaffold_100.462.1	0.87	0.87	0.35	1.91	28.308
evm.model.scaffold_100.45	2.29	1.14	0.29	0.29	77.104
evm.model.scaffold_100.872	1.43	0.57	0.57	1.43	31.317
evm.model.scaffold_100.1223_evm.model.scaffold_100.1224	1.33	0.67	1	1	20.426
evm.model.scaffold_100.24	1.82	0.66	0.67	0.85	12.306
evm.model.scaffold_100.1749	1.03	0.52	1.42	1.03	12.887
evm.model.scaffold_100.1083	2	0	0.67	1.33	16.583
evm.model.scaffold_100.18	1.88	0.94	0	1.18	12.732
evm.model.scaffold_100.579	2.12	0.71	0	1.18	270.954
evm.model.scaffold_100.1146	2.08	0.16	0.32	1.44	24.729
evm.model.scaffold_100.344	0.8	0.48	0.32	2.4	45.523
evm.model.scaffold_100.221	1.23	0	0.31	2.46	14.786
evm.model.scaffold_100.1245	1.05	1.47	0	1.47	29.179
evm.model.scaffold_100.777	1.33	0.33	1	1.33	30.314
evm.model.scaffold_100.799	1.33	1.33	0.95	0.38	81.801
evm.model.scaffold_100.1412	2.4	0	0.8	0.8	12.472
evm.model.scaffold_100.1726	1.5	0.56	1	0.94	22.618
evm.model.scaffold_100.530	2.4	0.27	0.27	1.07	38.862
evm.model.scaffold_100.911	1	0	1	2	18.337
evm.model.scaffold_100.1024	1.66	0.9	0.9	0.55	61.419
evm.model.scaffold_100.1402	1.2	0.2	0.4	2.2	237.499
evm.model.scaffold_100.150	1.85	0	0.62	1.54	161.702
evm.model.scaffold_100.369	1.78	1.19	0.3	0.74	14.77
evm.model.scaffold_100.293	1.38	0.92	0.62	1.08	77.48
evm.model.scaffold_100.480	1.5	0.5	0.3	1.7	33.33
evm.model.scaffold_100.1298.1	1.38	1.08	0.15	1.38	77.02
evm.model.scaffold_100.770	1.82	0.36	0.36	1.45	77.733
evm.model.scaffold_100.72	1.14	0.29	0	2.57	2850.16
evm.model.scaffold_100.1453	2.11	0.63	0.84	0.42	16.177
evm.model.scaffold_100.222	1.56	0.52	0.74	1.19	45.439
evm.model.scaffold_100.739	0.92	0.92	0.31	1.85	45.108
evm.model.scaffold_100.1086	0.83	0.83	0.67	1.67	30.495
evm.model.scaffold_100.175	1.6	0.27	0.89	1.24	15.604
evm.model.scaffold_100.71	1.71	0.86	0.36	1.07	16.835
evm.model.scaffold_100.260.1	1.73	0.54	0.76	0.97	20.649
evm.model.scaffold_100.1080	2.03	0.44	0.59	0.94	20.244
evm.model.scaffold_100.1276	2	0.57	0.57	0.86	11.161
evm.model.scaffold_100.1025	1.25	1.5	0.25	1	19.046
evm.model.scaffold_100.1538	1.47	0.42	1.26	0.84	36.744
evm.model.scaffold_100.65	1.45	1.09	1.09	0.36	194.269
evm.model.scaffold_100.886	1.82	0.61	0.73	0.85	77.411
evm.model.scaffold_100.504	0.84	1.05	1.05	1.05	10.379
evm.model.scaffold_100.466	1.45	0.85	0.48	1.21	19.233
evm.model.scaffold_100.497	0	1.5	1	1.5	13.717
evm.model.scaffold_100.958	1.78	0.44	0.59	1.19	40.46
evm.model.scaffold_100.400	1.76	0.56	0.43	1.25	130.561
evm.model.scaffold_100.524	1.47	0.21	1.05	1.26	168.836
evm.model.scaffold_100.1280	1.95	0	0.68	1.37	10.157
evm.model.scaffold_100.649	2	0	0.86	1.14	15.618
evm.model.scaffold_100.449	1.94	0.53	0.41	1.12	11.779
evm.model.scaffold_100.551.1	0.89	0.44	0	2.67	61.354
evm.model.scaffold_100.1495	1.71	0.69	0.69	0.91	22.89
evm.model.scaffold_100.688	0.75	2	0.25	1	22.012
evm.model.scaffold_100.578.1	1.79	0.55	1.24	0.41	31.265
evm.model.scaffold_100.782	1.91	0.17	0.17	1.74	91.758
evm.model.scaffold_100.1629	1.14	1.14	0.38	1.33	251.461
evm.model.scaffold_100.126	1.54	0.62	1.23	0.62	55.959
evm.model.scaffold_100.403	2	1.17	0	0.83	181.237
evm.model.scaffold_100.1497	1.14	0.82	0.24	1.8	164.859
evm.model.scaffold_100.1819	1.45	1.21	0.36	0.97	29.393
evm.model.scaffold_100.1250	0.83	2.07	0	1.1	108.012
evm.model.scaffold_100.829	2.13	1.07	0.27	0.53	36.995
evm.model.scaffold_100.1124.3	1.57	1	0.57	0.86	51.577
evm.model.scaffold_100.66	2.3	0.48	0.85	0.36	11.083
evm.model.scaffold_100.1194	0.4	1.2	1.2	1.2	150.766
evm.model.scaffold_100.207	2.86	0.57	0	0.57	21.772
evm.model.scaffold_100.1035	0.75	1	0.5	1.75	16.817
evm.model.scaffold_100.1147	2.18	0.61	0.73	0.48	20.407
evm.model.scaffold_100.878	2.22	0.44	0.67	0.67	15.42
evm.model.scaffold_100.1045	1.58	0.84	0.53	1.05	218.415
evm.model.scaffold_100.322	2.2	0.4	0.8	0.6	20.738
evm.model.scaffold_100.1835	0.92	1.54	0.62	0.92	14.988
evm.model.scaffold_100.924	1.14	1.14	0	1.71	14.675
evm.model.scaffold_100.588	1.7	0.52	0.84	0.94	26.159
evm.model.scaffold_100.33	1.45	1.82	0	0.73	182.765
evm.model.scaffold_100.538	1.18	0.62	0.51	1.69	43.966
evm.model.scaffold_100.1771	0.59	2.24	0	1.18	17.658
evm.model.scaffold_100.691.1	1.5	0.88	0.88	0.75	24.675
evm.model.scaffold_100.82	1.1	0.71	0.32	1.87	15.532
evm.model.scaffold_100.557	1.76	0.64	0.8	0.8	15.378
evm.model.scaffold_100.1007	1.6	0.8	0	1.6	14.404
evm.model.scaffold_100.1105	1.49	1.12	0.19	1.21	127.854
evm.model.scaffold_100.1862	1.14	1.49	0	1.37	17.228
evm.model.scaffold_100.332	1.2	0.96	0.16	1.68	19.775
evm.model.scaffold_100.363	1.18	0.59	0.59	1.65	110.57
evm.model.scaffold_100.1747	2.14	0.29	0.43	1.14	168.202
evm.model.scaffold_100.1504	1	2	1	0	26.27
evm.model.scaffold_100.868	1.44	0.44	0.56	1.56	20.958
evm.model.scaffold_100.1282	0.91	0.98	0.45	1.66	15.045
evm.model.scaffold_100.281	2.4	0	0.8	0.8	173.734
evm.model.scaffold_100.1493	1.82	0.36	0.73	1.09	10.873
evm.model.scaffold_100.547	2.18	0.73	0	1.09	114.314
evm.model.scaffold_100.1778	1.74	0.7	0.87	0.7	17.113
evm.model.scaffold_100.573	1.14	1.43	0	1.43	152.336
evm.model.scaffold_100.220	1.76	0.35	0.59	1.29	33.659
evm.model.scaffold_100.402	2.4	0.8	0.4	0.4	11.611
evm.model.scaffold_100.1209	0.92	0.62	0.31	2.15	13.955
evm.model.scaffold_100.1743	0	1.82	0	2.18	35.305
evm.model.scaffold_100.55	1.54	0.69	0.51	1.26	29.214
evm.model.scaffold_100.1790	1.23	0.51	0.41	1.85	10.695
evm.model.scaffold_100.1334	3.5	0	0.5	0	31.665
evm.model.scaffold_100.1827	1.52	1.14	0.19	1.14	17.887
evm.model.scaffold_100.393	2.22	0	0.89	0.89	12.817
evm.model.scaffold_100.885	2.08	0.32	1.12	0.48	12.723
evm.model.scaffold_100.1090	0.33	3	0	0.67	11.386
evm.model.scaffold_100.191	1.4	0.8	0.6	1.2	12.12
evm.model.scaffold_100.279	1	1	0.75	1.25	42.634
evm.model.scaffold_100.784	2.13	0.52	0.26	1.1	34.443
evm.model.scaffold_100.1342	1.45	0.91	0.73	0.91	74.093
evm.model.scaffold_100.1293	1.96	0.51	0.34	1.19	25.577
evm.model.scaffold_100.180	0.73	1.82	0.36	1.09	277.65
evm.model.scaffold_100.145	1.54	1.23	0	1.23	18.877
evm.model.scaffold_100.1640	0.57	1.43	0.19	1.81	185.709
evm.model.scaffold_100.263_evm.model.scaffold_100.264	1.93	0.59	0.66	0.83	20.618
evm.model.scaffold_100.978	2.32	0.65	0.13	0.9	31.564
evm.model.scaffold_100.608	1.33	1.11	0.67	0.89	37.513
evm.model.scaffold_100.972	2	0.86	0.86	0.29	14.448
evm.model.scaffold_100.1358	0.71	0	0.47	2.82	13.173
evm.model.scaffold_100.408.2	2.27	0.27	0.27	1.18	16.979
evm.model.scaffold_100.642	0.8	1.73	0.13	1.33	48.585
evm.model.scaffold_100.155	1.74	0.87	0.17	1.22	81.14
evm.model.scaffold_100.888	1.41	0.94	0.24	1.41	12.256
evm.model.scaffold_100.1728	0.8	0.8	0.8	1.6	15.924
evm.model.scaffold_100.853	1.94	0.42	0.55	1.09	26.387
evm.model.scaffold_100.529	3	0.33	0	0.67	24.201
evm.model.scaffold_100.1370	2.22	0.44	1.11	0.22	28.951
evm.model.scaffold_100.700	1.12	0.56	0.19	2.14	88.434
evm.model.scaffold_100.1055	1.7	1.45	0.12	0.73	18.19
evm.model.scaffold_100.1760	1.52	1.14	0.19	1.14	177.58
evm.model.scaffold_100.378	1.04	1.48	0.3	1.19	18.283
evm.model.scaffold_100.536	1.8	0.8	0.2	1.2	26.225
evm.model.scaffold_100.1873	4	0	0	0	15.119
evm.model.scaffold_100.1431	1.33	0.89	1.33	0.44	36.848
evm.model.scaffold_100.716	2	0.4	0.4	1.2	54.49
evm.model.scaffold_100.188	1.09	1.09	0.36	1.45	353.322
evm.model.scaffold_111.119.1	1.33	1.6	0.53	0.53	13.366
evm.model.scaffold_111.80	1.41	0.71	1.06	0.82	12.025
evm.model.scaffold_111.41	2.09	1.04	0.35	0.52	65.365
evm.model.scaffold_111.111	3.43	0.57	0	0	25.364
evm.model.scaffold_111.296	2	0	0	2	19.653
evm.model.scaffold_111.190	1	1	0.6	1.4	16.832
evm.model.scaffold_111.417	1.73	0.76	0.76	0.76	35.359
evm.model.scaffold_111.9	2.21	0.69	0.14	0.97	104.918
evm.model.scaffold_111.349	2.4	0.53	0	1.07	17.358
evm.model.scaffold_111.432	1.82	0.36	0.36	1.45	12.461
evm.model.scaffold_111.323	2.43	0.7	0.09	0.78	50.63
evm.model.scaffold_111.30	1.52	0.57	0.29	1.62	21.755
evm.model.scaffold_111.419	1.38	0.25	0.63	1.75	43.344
evm.model.scaffold_111.97	2	0.4	0.53	1.07	97.545
evm.model.scaffold_111.98	1.74	0.7	0.26	1.3	36.642
evm.model.scaffold_111.92	1.71	1.43	0.29	0.57	32.062
evm.model.scaffold_111.59	0	0.67	0	3.33	38.745
evm.model.scaffold_111.408	1.58	0.58	0.83	1	53.787
evm.model.scaffold_111.6	1.56	1.11	0.22	1.11	15.26
evm.model.scaffold_111.281	0.73	1.82	0.73	0.73	35.723
evm.model.scaffold_111.372	1.71	0.57	1.71	0	34.651
evm.model.scaffold_111.283	1.6	0.4	1.2	0.8	33.201
evm.model.scaffold_111.298	1.14	1.43	0	1.43	75.859
evm.model.scaffold_111.345	1.82	0.73	0.62	0.83	24.809
evm.model.scaffold_111.19	1.68	0.68	1	0.64	28.029
evm.model.scaffold_111.336	1.33	0.76	0.19	1.71	152.962
evm.model.scaffold_111.335	0.84	1.05	0.42	1.68	10.596
evm.model.scaffold_111.293	1.74	0.68	0.6	0.98	35.589
evm.model.scaffold_111.412	0.5	1	0	2.5	159.673
evm.model.scaffold_111.195	1.45	0.73	0	1.82	110.671
evm.model.scaffold_111.122	1.73	0.76	0.32	1.19	21.05
evm.model.scaffold_111.387	1.93	0.55	0.41	1.1	28.577
evm.model.scaffold_111.442	1.09	1.45	0.36	1.09	43.773
evm.model.scaffold_111.75	1.64	1.09	0.18	1.09	14.622
evm.model.scaffold_111.354	1.14	1.14	0	1.71	55.971
evm.model.scaffold_111.45	2	1.71	0	0.29	24.627
evm.model.scaffold_111.313	2	0	0.6	1.4	32.115
evm.model.scaffold_111.381	1.78	0.67	0.44	1.11	41.698
evm.model.scaffold_111.60	1.38	0.97	0.14	1.52	16.139
evm.model.scaffold_111.93	2	0.53	0.63	0.84	12.403
evm.model.scaffold_111.24	0.8	1.51	0.18	1.51	26.479
evm.model.scaffold_111.37.1	1.04	0.7	0.35	1.91	49.766
evm.model.scaffold_111.25	1.58	0.42	0.95	1.05	16.52
evm.model.scaffold_111.137	1.38	0.75	0.63	1.25	215.046
evm.model.scaffold_111.71	0.86	0.86	0	2.29	56.777
evm.model.scaffold_111.264	1.84	0.43	0.22	1.51	40.678
evm.model.scaffold_111.141	1.88	1	0.56	0.56	11.695
evm.model.scaffold_111.31	1.33	1.33	0.19	1.14	21.148
evm.model.scaffold_111.276_evm.model.scaffold_111.275	1.73	0.93	0.4	0.93	13.692
evm.model.scaffold_111.321	1.57	0.52	1.04	0.87	14.407
evm.model.scaffold_111.162	1.54	0	1.54	0.92	11.703
evm.model.scaffold_111.386	0.75	2.5	0.25	0.5	36.156
evm.model.scaffold_111.84	2.21	0.55	0.28	0.97	12.302
evm.model.scaffold_111.171	1.74	0.61	0.35	1.3	11.998
evm.model.scaffold_111.126	1.37	0.98	0.49	1.17	10.661
evm.model.scaffold_111.132	1.85	0.62	0.31	1.23	13.72
evm.model.scaffold_111.127	1.44	0.56	1	1	29.335
evm.model.scaffold_111.81	2.18	0.36	0.36	1.09	20.046
evm.model.scaffold_111.34.1	1.66	0.97	0.41	0.97	33.378
evm.model.scaffold_111.53	2	0	0.57	1.43	71.747
evm.model.scaffold_111.340	2.15	0.92	0	0.92	39.099
evm.model.scaffold_111.269	2.13	0.8	0.53	0.53	30.698
evm.model.scaffold_111.268	2.29	0	0.57	1.14	36.07
evm.model.scaffold_111.399	1.43	1.14	0	1.43	36.649
evm.model.scaffold_111.250	1.81	0.38	0.88	0.93	10.195
evm.model.scaffold_111.208	0	0.57	0.57	2.86	16.367
evm.model.scaffold_111.401	1.33	0.61	0.85	1.21	11.489
evm.model.scaffold_111.316	1.67	1.33	0.11	0.89	237.597
evm.model.scaffold_111.297	2.07	0.69	0.14	1.1	31.406
evm.model.scaffold_111.373	4	0	0	0	68.415
evm.model.scaffold_111.331	1.54	0.21	0.77	1.47	36.741
evm.model.scaffold_111.415	1.67	0.17	0.17	2	116.47
evm.model.scaffold_111.291	2	0.57	0.43	1	12.674
evm.model.scaffold_111.355	1.23	0.92	0.62	1.23	49.523
evm.model.scaffold_111.304	2	0.27	0.4	1.33	33.534
evm.model.scaffold_111.371	2.18	1.09	0.73	0	27.104
evm.model.scaffold_111.32	1.22	0.33	0.33	2.11	20.495
evm.model.scaffold_111.67	1.47	0.84	0.63	1.05	154.088
evm.model.scaffold_111.70	1.51	0.83	0.75	0.91	16.271
evm.model.scaffold_111.62	1.3	0.74	1.02	0.93	13.373
evm.model.scaffold_111.346	1.18	0.24	1.41	1.18	20.321
evm.model.scaffold_111.193	1.75	0.5	0	1.75	14.027
evm.model.scaffold_111.270	1.33	0.77	0.63	1.26	30.495
evm.model.scaffold_111.279	1.08	0.54	0.65	1.73	15.118
evm.model.scaffold_111.128	1.86	0.29	0.86	1	29.938
evm.model.scaffold_111.18	1.2	0.8	0.4	1.6	35.958
evm.model.scaffold_111.36	0.31	0.31	0.31	3.08	27.495
evm.model.scaffold_111.420	1.33	1.04	0.74	0.89	21.604
evm.model.scaffold_111.142	0.57	1.14	0.57	1.71	75.388
evm.model.scaffold_111.299.1	1.3	1.2	0.4	1.1	83.035
evm.model.scaffold_111.274	1.78	0.89	0.53	0.8	22.63
evm.model.scaffold_111.170	2.18	1.09	0.36	0.36	54.613
evm.model.scaffold_111.116	1.82	0.8	0.44	0.95	11.054
evm.model.scaffold_111.289	0.67	1.33	1.33	0.67	16.448
evm.model.scaffold_111.63	2.4	0.53	0.4	0.67	20.757
evm.model.scaffold_111.46	1.52	0.95	0	1.52	51.015
evm.model.scaffold_111.285	1.66	0.8	0.62	0.92	32.459
evm.model.scaffold_111.351	2.46	0.92	0.31	0.31	54.701
evm.model.scaffold_111.15	1.61	0.7	0.77	0.91	11.766
evm.model.scaffold_111.61	1.76	0.16	0.32	1.76	19.498
evm.model.scaffold_111.236	1.87	0.27	0.53	1.33	36.739
evm.model.scaffold_111.196	1.55	0.45	0.73	1.27	12.362
evm.model.scaffold_111.110	1.71	0.86	0	1.43	11.258
evm.model.scaffold_111.147	0.52	1.94	0.13	1.42	166.594
evm.model.scaffold_111.103	2.15	0.92	0	0.92	719.196
evm.model.scaffold_111.254	1.33	1.07	0.27	1.33	31.727
evm.model.scaffold_111.78	1	1.17	0	1.83	43.476
evm.model.scaffold_111.352.4	2	0	0.57	1.43	28.675
evm.model.scaffold_111.160	1.82	0.55	0.36	1.27	530.064
evm.model.scaffold_111.267	1.67	1	0.67	0.67	19.504
evm.model.scaffold_111.260_evm.model.scaffold_111.261	1.23	0.62	0	2.15	25.259
evm.model.scaffold_111.385	2	0.11	0.53	1.37	21.455
evm.model.scaffold_111.398	2.07	0.55	0.55	0.83	39.045
evm.model.scaffold_111.69	1.62	0.76	0.32	1.3	10.489
evm.model.scaffold_111.44	0.86	1.14	0.86	1.14	347.489
evm.model.scaffold_111.290	0	2.4	0.8	0.8	16.105
evm.model.scaffold_111.198	2	1	1	0	11.702
evm.model.scaffold_111.319	2.33	0.67	0	1	10.735
evm.model.scaffold_111.390.2	2.53	0.84	0	0.63	130.203
evm.model.scaffold_23.103	1.96	0.15	0.68	1.21	14.351
evm.model.scaffold_23.16	1.33	0.67	0	2	29.278
evm.model.scaffold_23.92.1	1.33	1.33	0.67	0.67	356.697
evm.model.scaffold_23.45	1.73	0.93	0.27	1.07	17.461
evm.model.scaffold_23.49	1.33	2	0.33	0.33	18.174
evm.model.scaffold_23.93	1.09	0.73	0.73	1.45	20.432
evm.model.scaffold_23.22	2	0.53	0.53	0.95	32.917
evm.model.scaffold_23.25.1	0.33	2	0.67	1	84.389
evm.model.scaffold_23.36	1.57	1.74	0.35	0.35	22.217
evm.model.scaffold_23.12	2.5	1.17	0.17	0.17	31.929
evm.model.scaffold_23.7	2	0.57	0.57	0.86	17.189
evm.model.scaffold_23.17	2.18	0	1.09	0.73	21.705
evm.model.scaffold_23.2	1.73	0.8	0.53	0.93	33.004
evm.model.scaffold_23.6	1.62	0.29	0.95	1.14	12.526
evm.model.scaffold_23.18	3	0	1	0	19.747
evm.model.scaffold_23.8	1.9	0.29	0.67	1.14	28.413
evm.model.scaffold_23.90	1.07	0.27	0.53	2.13	29.288
evm.model.scaffold_23.48	0.63	1.68	0.42	1.26	13.129
evm.model.scaffold_335.40	2.17	0.67	0.17	1	26.168
evm.model.scaffold_335.11	1.17	0.39	0.59	1.85	10.094
evm.model.scaffold_335.9	1.5	1	0.5	1	83.103
evm.model.scaffold_335.32	2	0.44	0.56	1	26.984
evm.model.scaffold_335.53	1.6	0.8	0.32	1.28	89.319
evm.model.scaffold_335.24	0.5	1	1.5	1	19.59
evm.model.scaffold_335.12	2.15	0.31	0.92	0.62	24.233
evm.model.scaffold_335.8	1.17	2	0.33	0.5	74.953
evm.model.scaffold_335.34	1.6	1.24	0	1.16	33.903
evm.model.scaffold_335.30	1.8	0.8	0.6	0.8	22.451
evm.model.scaffold_335.23	1.9	0.19	0.95	0.95	15.786
evm.model.scaffold_335.5	2.67	0	0	1.33	11.28
evm.model.scaffold_335.47	1.39	0.7	0.7	1.22	10.281
evm.model.scaffold_335.1	2.13	0	0.53	1.33	40.658
evm.model.scaffold_335.26.2	1.62	0.77	0.77	0.85	24.77
evm.model.scaffold_335.6	2.29	0	0.29	1.43	11.083
evm.model.scaffold_181.28	1	0.55	0.64	1.82	12.149
evm.model.scaffold_181.19	1.33	0.44	0.89	1.33	26.723
evm.model.scaffold_181.20	2.21	0.53	0.84	0.42	36.724
evm.model.scaffold_181.11	0.86	0.57	0.29	2.29	569.931
evm.model.scaffold_181.24	3.33	0	0	0.67	10.327
evm.model.scaffold_181.44	1.27	0.67	0.6	1.47	11.829
evm.model.scaffold_181.56	1	0	0	3	130.005
evm.model.scaffold_181.60	1.5	1.5	0	1	69.066
evm.model.scaffold_181.55	0.71	0.71	0.29	2.29	15.536
evm.model.scaffold_181.15	1.97	0.98	0.25	0.8	22.03
evm.model.scaffold_181.32	1.22	0.52	1.74	0.52	14.921
evm.model.scaffold_6.5	1.14	0	2.29	0.57	10.874
evm.model.scaffold_31.82	1.33	0	0.67	2	29.092
evm.model.scaffold_31.78	2.03	0.41	0.61	0.95	11.413
evm.model.scaffold_31.26	1.07	0.8	1.07	1.07	17.917
evm.model.scaffold_31.8	2.15	0.49	0.88	0.49	56.604
evm.model.scaffold_31.63	1.33	1.33	0.67	0.67	49.038
evm.model.scaffold_31.10	1.33	0.36	0.24	2.06	19.915
evm.model.scaffold_31.100	2.13	0.27	0.8	0.8	234.02
evm.model.scaffold_31.21	0.76	0.95	0.38	1.9	391.846
evm.model.scaffold_31.25	1.61	0.91	0.84	0.63	10.573
evm.model.scaffold_31.64	1.12	0.96	0.8	1.12	13.415
evm.model.scaffold_31.118	1.43	0.86	0.86	0.86	672.478
evm.model.scaffold_31.22	2	2	0	0	120.716
evm.model.scaffold_31.124	0.62	0.62	0.31	2.46	60.215
evm.model.scaffold_31.77	1.88	0.71	0.47	0.94	840.892
evm.model.scaffold_31.19	2	1.5	0	0.5	119.592
evm.model.scaffold_31.35	1.22	0.9	0.33	1.55	16.782
evm.model.scaffold_160.14	2	0.43	0.78	0.78	15.712
evm.model.scaffold_160.19	1.03	0.77	0.26	1.94	26.54
evm.model.scaffold_160.13	2	0.4	1	0.6	23.273
evm.model.scaffold_160.7	1.18	0.47	0.24	2.12	35.276
evm.model.scaffold_160.25	2	0	0.5	1.5	54.134
evm.model.scaffold_160.1	0.92	0.31	1.85	0.92	23.2
evm.model.scaffold_160.6	0.8	1.6	0	1.6	43.346
evm.model.scaffold_421.3	2.07	0.57	0.36	1	14.836
evm.model.scaffold_1.2	1.33	0.3	0.59	1.78	11.393
evm.model.scaffold_3.32	1.41	0.76	0.76	1.08	19.354
evm.model.scaffold_3.66	1	1	0	2	12.218
evm.model.scaffold_3.15	1.46	0.98	0.39	1.17	12.805
evm.model.scaffold_3.31	1.68	0.65	0.39	1.29	10.844
evm.model.scaffold_3.71	1.58	0.63	0.74	1.05	11.052
evm.model.scaffold_3.85	1.21	0.7	0.57	1.52	12.646
evm.model.scaffold_3.45	1.33	0.44	0	2.22	14.528
evm.model.scaffold_189.19	1.94	0.52	0.65	0.9	16.407
evm.model.scaffold_189.39	1.25	0	0.5	2.25	11.104
evm.model.scaffold_189.86	1.69	0.44	0.47	1.4	50.35
evm.model.scaffold_189.31	1.04	1.04	0.59	1.33	25.316
evm.model.scaffold_189.11	1.2	0.8	0.4	1.6	77.597
evm.model.scaffold_189.88	0.5	1	1.5	1	14.082
evm.model.scaffold_189.82	0.73	2.18	0.36	0.73	102.259
evm.model.scaffold_189.34	1.37	0.46	0.46	1.71	128.233
evm.model.scaffold_189.40	1.91	0.55	0.27	1.27	11.909
evm.model.scaffold_189.91	1.87	0.53	0.27	1.33	14.707
evm.model.scaffold_189.97	1	0.75	0	2.25	17.527
evm.model.scaffold_189.100	1.2	0.8	0.4	1.6	17.094
evm.model.scaffold_189.18	1.83	1.17	0.5	0.5	29.808
evm.model.scaffold_189.26	1.63	0.5	0.38	1.5	10.657
evm.model.scaffold_189.46	1.88	0.47	0	1.65	37.825
evm.model.scaffold_189.24	1.27	1.27	0	1.45	88.13
evm.model.scaffold_189.72	0.57	0.57	0	2.86	23.273
evm.model.scaffold_189.14	2	0.4	1.2	0.4	74.78
evm.model.scaffold_189.76	1.06	1.41	0.35	1.18	44.235
evm.model.scaffold_189.85	1.17	0.33	0.83	1.67	24.42
evm.model.scaffold_189.55	1.8	0	1.4	0.8	12.846
evm.model.scaffold_189.71	2	0	0	2	21.682
evm.model.scaffold_189.62	2.12	0.24	0	1.65	13.603
evm.model.scaffold_189.98	0.89	0.89	0.44	1.78	29.903
evm.model.scaffold_189.89	2	0.8	0	1.2	58.281
evm.model.scaffold_189.38	1.33	0.89	0.67	1.11	22.422
evm.model.scaffold_189.45	1.16	1.16	0.9	0.77	54.874
evm.model.scaffold_189.75	2.4	0	0	1.6	86.27
evm.model.scaffold_394.385	0.89	0.44	1.78	0.89	10.612
evm.model.scaffold_394.141	2.67	0.67	0	0.67	60.044
evm.model.scaffold_394.537	1.16	0.63	0.21	2	235.313
evm.model.scaffold_394.92	0.67	1.78	0.3	1.26	143.287
evm.model.scaffold_394.320	1.87	0.26	0.34	1.53	19.789
evm.model.scaffold_394.291	2.24	0.32	0.32	1.12	59.039
evm.model.scaffold_394.65	0.29	1.29	0.43	2	47.28
evm.model.scaffold_394.184	1	0	1	2	192.107
evm.model.scaffold_394.5	0.36	1.82	0.73	1.09	11.169
evm.model.scaffold_394.421	3.33	0	0	0.67	41.899
evm.model.scaffold_394.176	1.88	0.74	0.3	1.09	10.544
evm.model.scaffold_394.272	1.6	0.8	0	1.6	62.986
evm.model.scaffold_394.536	1.5	1	1	0.5	14.064
evm.model.scaffold_394.180	1.5	1.25	0.5	0.75	41.008
evm.model.scaffold_394.195	1.09	0.36	0.73	1.82	89.703
evm.model.scaffold_394.369	2.22	0.74	0.44	0.59	11.009
evm.model.scaffold_394.185	4	0	0	0	201.135
evm.model.scaffold_394.319	0.5	2.17	0.17	1.17	48.259
evm.model.scaffold_394.162	2	1	0.5	0.5	113.701
evm.model.scaffold_394.429	0.8	0.96	0.64	1.6	17.435
evm.model.scaffold_394.40	1.33	1.33	0	1.33	33.186
evm.model.scaffold_394.104.1	1.78	0.78	0.67	0.78	60.189
evm.model.scaffold_394.67	2.86	0.57	0	0.57	32.945
evm.model.scaffold_394.508	2	0.25	0.25	1.5	20.7
evm.model.scaffold_394.22	1.63	0.75	0.5	1.13	72.871
evm.model.scaffold_394.170	2.29	0.49	0.33	0.9	30.07
evm.model.scaffold_394.563	2.29	0.57	0.57	0.57	69.156
evm.model.scaffold_394.527	1.45	0	0	2.55	137.265
evm.model.scaffold_394.181	2.4	0.8	0	0.8	43.526
evm.model.scaffold_394.490	0.99	1.04	0.88	1.09	49.711
evm.model.scaffold_394.77	0.89	2.67	0	0.44	28.084
evm.model.scaffold_394.292	1.33	0.8	0.8	1.07	26.68
evm.model.scaffold_394.496_evm.model.scaffold_394.497	0.64	1.28	1.12	0.96	60.767
evm.model.scaffold_394.152	0.8	1.2	0	2	143.551
evm.model.scaffold_394.270	2.11	0.56	0.44	0.89	12.855
evm.model.scaffold_394.309.2	1.79	0.34	1.02	0.85	155.297
evm.model.scaffold_394.182	1.09	1.09	0.91	0.91	15.392
evm.model.scaffold_394.529	1.62	0.38	0.95	1.05	15.484
evm.model.scaffold_394.146	2	0.29	0.57	1.14	41.757
evm.model.scaffold_394.495	2.05	0.39	0.88	0.68	10.504
evm.model.scaffold_394.342	1.6	0.2	0.2	2	167.958
evm.model.scaffold_394.441	2.57	0.57	0.14	0.71	63.242
evm.model.scaffold_394.557	0.86	1.14	0.29	1.71	41.964
evm.model.scaffold_394.553	2.26	0.72	0.51	0.51	44.799
evm.model.scaffold_394.335	1.63	0.3	0.74	1.33	10.526
evm.model.scaffold_394.428	3	0.5	0.5	0	38.206
evm.model.scaffold_394.387	0	3	0	1	170.838
evm.model.scaffold_394.351	1.6	0.4	0.4	1.6	12.864
evm.model.scaffold_394.163	1.14	0.57	0.34	1.94	50.403
evm.model.scaffold_394.58	0.92	0	0.62	2.46	17.168
evm.model.scaffold_394.399	1.89	0.49	0.7	0.92	20.928
evm.model.scaffold_394.535.1	2	0.55	0.48	0.97	81.998
evm.model.scaffold_394.547	1.6	0.8	0.8	0.8	14.716
evm.model.scaffold_394.458	1.38	0.77	0.77	1.08	21.083
evm.model.scaffold_394.8	1.88	0.67	0.48	0.97	10.094
evm.model.scaffold_394.131	1.65	0.78	0.43	1.13	37.584
evm.model.scaffold_394.459	3.33	0.67	0	0	36.113
evm.model.scaffold_394.353.2	1.64	1	0.5	0.86	13.486
evm.model.scaffold_394.264	1.93	0.44	0.15	1.48	21.583
evm.model.scaffold_394.147	1.25	1	0.75	1	49.839
evm.model.scaffold_394.119	1.56	0.78	0.44	1.22	13.583
evm.model.scaffold_394.519	0.8	0.4	0	2.8	11.277
evm.model.scaffold_394.290	1.87	0.53	0.53	1.07	11.563
evm.model.scaffold_394.517	1.6	0.8	0	1.6	30.63
evm.model.scaffold_394.328	2.5	1	0	0.5	143.976
evm.model.scaffold_394.372	1.4	1.4	0	1.2	27.496
evm.model.scaffold_394.348	1.71	1.14	0	1.14	78.092
evm.model.scaffold_394.20	1.33	0.83	0.83	1	75.435
evm.model.scaffold_394.35	1.18	1.02	0.39	1.41	31.506
evm.model.scaffold_394.114	1.82	1.45	0.73	0	39.083
evm.model.scaffold_394.463	2.07	1.48	0	0.44	74.047
evm.model.scaffold_394.167	0	2.33	0	1.67	19.171
evm.model.scaffold_394.173	1.48	0.74	0.3	1.48	80.774
evm.model.scaffold_394.395	1.39	0.87	0.35	1.39	14.444
evm.model.scaffold_394.365	1.14	0.86	0.57	1.43	12.127
evm.model.scaffold_394.410	1.87	0.73	0.53	0.87	59.014
evm.model.scaffold_394.424	1.85	0.31	0.92	0.92	654.145
evm.model.scaffold_394.214	1.33	0.93	0.27	1.47	11.818
evm.model.scaffold_394.28	0.18	0.91	0	2.91	23.424
evm.model.scaffold_394.134	1.3	0.4	0.9	1.4	42.397
evm.model.scaffold_394.135	1.28	1.76	0	0.96	105.393
evm.model.scaffold_394.312	1.6	0.34	0.46	1.6	42.427
evm.model.scaffold_394.68	2	0.8	0	1.2	122.274
evm.model.scaffold_394.212	1.76	0.27	0.69	1.28	30.825
evm.model.scaffold_394.273	1.07	1.87	0.4	0.67	12.535
evm.model.scaffold_394.357	1.85	0.62	0.62	0.92	13.251
evm.model.scaffold_394.36	2.4	0.6	0.4	0.6	24.749
evm.model.scaffold_394.108	1.94	0.52	0.26	1.29	45.399
evm.model.scaffold_394.405	1.57	0.57	0.86	1	17.07
evm.model.scaffold_394.346	1.24	0.55	0.28	1.93	10.351
evm.model.scaffold_394.11	1.18	0.71	0.47	1.65	49.021
evm.model.scaffold_394.226	1.53	1.06	0.47	0.94	54.384
evm.model.scaffold_394.389	1.79	0.92	0.62	0.67	20.08
evm.model.scaffold_394.337	1.85	0.59	0.78	0.78	55.205
evm.model.scaffold_394.265	1.67	1.67	0.17	0.5	46.229
evm.model.scaffold_394.59	0.67	2.67	0	0.67	396.268
evm.model.scaffold_394.288	1.6	0.6	0.6	1.2	27.972
evm.model.scaffold_394.445	1.73	0.73	0.45	1.09	15.385
evm.model.scaffold_394.518	1.18	0.55	0	2.27	338.811
evm.model.scaffold_394.564	1.26	1.05	1.05	0.63	20.9
evm.model.scaffold_394.440	1.74	0.87	0.87	0.52	10.488
evm.model.scaffold_394.340	2.15	0.2	0.88	0.78	10.919
evm.model.scaffold_394.394	2.29	0.57	0.76	0.38	25.215
evm.model.scaffold_394.350	1.09	1.27	0.45	1.18	63.837
evm.model.scaffold_394.150	2.4	0	0.4	1.2	91.868
evm.model.scaffold_394.43	1.33	0.83	0	1.83	20.155
evm.model.scaffold_394.502	1.6	0.87	0.58	0.95	21.033
evm.model.scaffold_394.388	1.58	0.63	0.21	1.58	12.359
evm.model.scaffold_394.451	1.82	0	0.36	1.82	29.211
evm.model.scaffold_394.522	0.95	0.48	0.29	2.29	112.923
evm.model.scaffold_394.383	1.5	0.75	0.75	1	21.671
evm.model.scaffold_394.362	1.94	0.77	0.26	1.03	136.347
evm.model.scaffold_394.416	0.86	0.86	0.71	1.57	21.347
evm.model.scaffold_394.192	1.43	0.86	1.14	0.57	19.926
evm.model.scaffold_394.330	1.85	0.92	0	1.23	28.689
evm.model.scaffold_394.126	1.25	1.08	0.33	1.33	23.19
evm.model.scaffold_394.464	1.2	0.4	1.2	1.2	91.14
evm.model.scaffold_394.120	2	0.44	1.11	0.44	10.344
evm.model.scaffold_394.442	1.23	0.92	0.31	1.54	68.634
evm.model.scaffold_394.548	1	1	0	2	13.044
evm.model.scaffold_394.382	0.67	0	0.67	2.67	952.058
evm.model.scaffold_394.138.1	1.53	0.68	0.68	1.11	16.9
evm.model.scaffold_394.512	1.08	1.23	0.62	1.08	26.105
evm.model.scaffold_394.400	2.34	0.55	0.69	0.41	184.065
evm.model.scaffold_394.66	1.52	0.57	0.57	1.33	90.925
evm.model.scaffold_394.132	1.62	0.85	0.77	0.77	12.625
evm.model.scaffold_394.154	1.79	0.83	0.14	1.24	334.172
evm.model.scaffold_394.412.1	1.62	1.14	0.29	0.95	365.343
evm.model.scaffold_394.149	1.48	0.8	0.68	1.05	11.255
evm.model.scaffold_394.555	2.46	0.15	0.62	0.77	14.003
evm.model.scaffold_394.63	1.22	0.52	0.87	1.39	34.395
evm.model.scaffold_394.552	1.69	0.62	0.31	1.38	379.606
evm.model.scaffold_394.39	2.55	0.36	0	1.09	48.154
evm.model.scaffold_394.140	2	0.33	0.33	1.33	44.481
evm.model.scaffold_394.128	1.54	0.92	0.62	0.92	24.169
evm.model.scaffold_394.551	1.51	0.29	0.83	1.37	23.387
evm.model.scaffold_394.52	1.52	0.67	0.76	1.05	10.761
evm.model.scaffold_394.300	2.18	0.36	0.85	0.61	24.083
evm.model.scaffold_394.452	1.82	0	0.36	1.82	38.519
evm.model.scaffold_394.136.1	2	0.86	0.29	0.86	34.628
evm.model.scaffold_394.413	1.74	0.3	1.13	0.83	27.718
evm.model.scaffold_394.165	1.6	1.6	0	0.8	27.223
evm.model.scaffold_394.446	1.89	1.05	0.42	0.63	19.32
evm.model.scaffold_394.95	0.8	0.8	0.32	2.08	30.233
evm.model.scaffold_394.225	0.8	0.8	0.4	2	12.654
evm.model.scaffold_394.384	1.33	1.67	0.33	0.67	50.064
evm.model.scaffold_394.112	1.56	1.33	0.44	0.67	17.73
evm.model.scaffold_394.151	1	1.2	0.4	1.4	36.008
evm.model.scaffold_394.531	2.5	0.5	0	1	21.438
evm.model.scaffold_394.352	1.14	1.14	0.29	1.43	334.032
evm.model.scaffold_394.558	1.88	0.71	0.71	0.71	2105.94
evm.model.scaffold_394.44	0.67	1	0.33	2	69.388
evm.model.scaffold_394.235	1.23	0.77	0.62	1.38	40.715
evm.model.scaffold_394.183	1.6	0.6	0.6	1.2	128.095
evm.model.scaffold_394.499	1.71	0.38	0.38	1.52	112.6
evm.model.scaffold_394.208	1.71	1.14	0.29	0.86	156.884
evm.model.scaffold_394.110	1.98	0.53	0.65	0.84	15.972
evm.model.scaffold_394.116	1.18	1.18	0.71	0.94	10.517
evm.model.scaffold_394.4	0.93	1.2	1.07	0.8	12.819
evm.model.scaffold_394.431	0.67	0.67	0	2.67	14.74
evm.model.scaffold_394.80.1	2.32	0.42	0.21	1.05	55.5
evm.model.scaffold_394.153	1.95	0.84	0.56	0.65	31.714
evm.model.scaffold_394.541	1.39	1.04	0.35	1.22	73.863
evm.model.scaffold_394.148	1.33	1.33	0.44	0.89	100.152
evm.model.scaffold_394.121	0	1.71	0.57	1.71	14.418
evm.model.scaffold_394.514.1	2.11	0.44	0.56	0.89	18.828
evm.model.scaffold_47.3	1.6	0.96	0.96	0.48	24.769
evm.model.scaffold_44.272	0.73	1.09	0.36	1.82	18.69
evm.model.scaffold_44.496	0.8	1.44	0.32	1.44	47.619
evm.model.scaffold_44.38	2.05	0.11	0.54	1.3	35.968
evm.model.scaffold_44.245	1	1	0.5	1.5	17.826
evm.model.scaffold_44.468	2.19	0.38	0.29	1.14	11.022
evm.model.scaffold_44.135	2.5	0.25	0.25	1	29.662
evm.model.scaffold_44.474	1.6	0.8	0.8	0.8	52.511
evm.model.scaffold_44.358	1.84	0.64	0.77	0.75	10.594
evm.model.scaffold_44.361	1.51	0.43	0.76	1.3	14.762
evm.model.scaffold_44.520	1.5	2	0.5	0	51.131
evm.model.scaffold_44.50	2.48	0.19	0.57	0.76	11.666
evm.model.scaffold_44.433	0.67	0.67	0.67	2	13.785
evm.model.scaffold_44.87	1.78	0.89	0.67	0.67	53.771
evm.model.scaffold_44.118	1.23	0.31	0.31	2.15	22.838
evm.model.scaffold_44.383	1.27	0.73	0.91	1.09	13.308
evm.model.scaffold_44.216	2.11	0.42	0.84	0.63	16.137
evm.model.scaffold_44.347	1.33	0.8	0.53	1.33	31.861
evm.model.scaffold_44.449	2.58	1.16	0	0.26	32.135
evm.model.scaffold_44.258	1.07	0.8	0.53	1.6	57.986
evm.model.scaffold_44.403	2.21	0.41	0.83	0.55	131.432
evm.model.scaffold_44.122	1.11	0.44	0.44	2	1544.53
evm.model.scaffold_44.69	1.66	1.1	0.14	1.1	11.887
evm.model.scaffold_44.379	2.33	0.33	0.33	1	326.863
evm.model.scaffold_44.48	1.23	0.31	0.92	1.54	20.378
evm.model.scaffold_44.219	1	0.5	1.25	1.25	70.364
evm.model.scaffold_44.33	1.17	0.33	0.67	1.83	10.904
evm.model.scaffold_44.42	1.14	0.57	0	2.29	15.272
[truncated: 7,356 more rows]

## Sheet: Ser
Gene	UCU	UCC	UCA	UCG	AGU	AGC	RPKM
[truncated: 9,172 more rows]

## Sheet: Pro
Gene	CCU	CCC	CCA	CCG	RPKM
[truncated: 9,172 more rows]

[truncated: 12 more sheets: Thr, Ala, Tyr, His, Gln, Asn, Lys, Asp, Glu, Cys, Arg, Gly]
